# Supplementary material for: Quantitative Proteomics Analysis Expands the Roles of Lysine β‐Hydroxybutyrylation Pathway in Response to Environmental β‐Hydroxybutyrate
Source: Hindawi journal article supplement (doi:10.1155/2022/4592170), 2022-01-01
Supplement: f1 [file 4592170.f1.zip]

**Table S3: The identification of Kbh sites and substrates.**

| Gene name | UniprotID | Site in protein | Peptide                    | Position | Quality | Score  | Ratio:Rep1 | Ratio:Rep2 | Ratio:Rep3  | Ratio_average |
|-----------|-----------|-----------------|----------------------------|----------|---------|--------|------------|------------|-------------|---------------|
| Gls       | D3Z7P3    | 163             | IPVHK(*)FITALK(*)          | K5       | 51.08   | 90.32  | 1.49462365 | 1.01265822 | 1.12765957  | 1.211647153   |
| Prdx6     | O08709    | 144             | LK(*)LSILYPATTGR(*)        | K2       | 72.66   | 1000   | -          | 1.16176470 | -           | -             |
| Prdx6     | O08709    | 56              | AAK(*)LAPEFAK(*)           | K3       | 55.48   | 81.81  | -          | 0.92647058 | 0.80219780  | 0.864334195   |
| Prkcsh    | O08795    | 369             | SK(*)FEEVER(*)             | K2       | 65.35   | 1000   | 1.17708333 | 1.36363636 | 1.10752688  | 1.216082193   |
| Prkcsh    | O08795    | 158             | QSK(*)LLELQAGK(*)          | K3       | 65.1    | 101.72 | 0.97916666 | -          | -           | -             |
| Atox1     | O08997    | 60              | TGK(*)AVSYLGPK(*)          | K3       | 96.52   | 150.89 | -          | 38.6363636 | 45.0112359  | 41.8237998    |
| Phb2      | O35129    | 250             | NPGYIK(*)LR(*)             | K6       | 54.8    | 1000   | 1.28865979 | -          | 1.76595744  | 1.527308621   |
| Phb2      | O35129    | 147             | SVVAK(*)FNASQLITQR(*)      | K5       | 44.67   | 1000   | 1.03092783 | -          | -           | -             |
| Psm4      | O35226    | 74              | ILSK(*)LHTVQPK(*)          | K4       | 14.51   | 104.64 | -          | -          | 0.913043478 | -             |
| Anxa3     | O35639    | 169             | R(*)DESLK(*)VDEHLAK(*)     | K6       | 23.99   | 83.89  | -          | 1.37349397 | -           | -             |
| Nudc      | O35685    | 276             | INPENSK(*)LSDLDSETR(*)     | K7       | 14.89   | 1000   | 1.65555555 | -          | -           | -             |
| Api5      | O35841    | 202             | ILSGLK(*)SLQTVSGR(*)       | K6       | 47.72   | 1000   | 1.28723404 | 0.8        | 0.90217391  | 0.996469319   |
| Cops5     | O35864    | 56              | YC(+57.02)K(*)ISALALLK(*)  | K3       | 27.63   | 150.63 | -          | 1.36       | -           | -             |
| Cavin1    | O54724    | 163             | VMIYQDEVK(*)LPAK(*)        | K9       | 39.03   | 58.99  | 0.55681818 | 1.33766233 | 0.94444444  | 0.946308321   |
| Cavin1    | O54724    | 167             | LPAK(*)LSVSK(*)            | K4       | 37.28   | 73.54  | 0.75       | 1          | -           | 0.875         |
| Sap18     | O55128    | 24              | EK(*)TC(+57.02)PLLLR(*)    | K2       | 45.71   | 1000   | -          | 1.60810810 | -           | -             |
| Rpl35a    | O55142    | 8               | LWC(+57.02)K(*)AIFAGYK(*)  | K4       | 35      | 122.76 | 1.38888888 | -          | 1.28318584  | 1.336037365   |
| Pdlim1    | O70400    | 254             | VAASVGNAQK(*)LPIC(+57.02)  | K10      | 34.7    | 95.35  | 1.88043478 | 1.39473684 | -           | 1.637585813   |
| Psm3      | O70435    | 57              | LVLSK(*)LYEEGSNK(*)        | K5       | 33.19   | 150.77 | -          | 1.17283950 | 1.5         | 1.336419753   |
| Ugdh      | O70475    | 107             | AADLK(*)YIEAC(+57.02)AR(*) | K5       | 46.61   | 1000   | -          | 1.05194805 | -           | -             |
| Hsd17b12  | O70503    | 97              | EK(*)FNVETR(*)             | K2       | 66.61   | 1000   | -          | 1.38571428 | -           | -             |
| Hsd17b12  | O70503    | 86              | SQDK(*)LNQVSNNIK(*)        | K4       | 30.03   | 198.17 | -          | 2.01428571 | -           | -             |
| Wdr1      | O88342    | 182             | FK(*)FTIGDHSR(*)           | K2       | 56.5    | 1000   | 1.67346938 | -          | -           | -             |
| Wdr1      | O88342    | 405             | DYSGQGQVVK(*)LDVQPK(*)     | K9       | 33.09   | 112.31 | -          | 1.83544303 | 1.81914893  | 1.827295987   |
| Wdr1      | O88342    | 81              | YIASGDISGK(*)LR(*)         | K10      | 15.12   | 1000   | -          | 1.73417721 | -           | -             |
| Cops6     | O88545    | 233             | VK(*)LILEYVK(*)            | K2       | 17.05   | 142.27 | -          | 0.81578947 | -           | -             |
| Hnrnpa2b1 | O88569    | 173             | IVLQK(*)YHTINGHNAEVR(*)    | K5       | 74      | 1000   | -          | 1.03947368 | 1.02298850  | 1.031231095   |
| C4b       | P01029    | 1497            | ADLEK(*)LTSLSDR(*)         | K5       | 23.42   | 1000   | 0.07692307 | -          | 0.08333333  | 0.080128205   |
| Lamc1     | P02468    | 1301            | LIDQK(*)LK(*)              | K5       | 16.7    | 1000   | -          | 0.77906976 | -           | -             |
| Lamb1     | P02469    | 1736            | SK(*)LQLLEDLER(*)          | K2       | 57.81   | 1000   | 0.90526315 | 0.7375     | -           | 0.821381579   |
| Lamb1     | P02469    | 1589            | SATDVK(*)VTADMVK(*)        | K6       | 46.75   | 107.64 | -          | 0.825      | -           | -             |

|          |        |      |                            |     |       |        |            |             |                         |
|----------|--------|------|----------------------------|-----|-------|--------|------------|-------------|-------------------------|
| Lamb1    | P02469 | 1208 | ALK(*)ISGVIGPYR(*)         | K3  | 23.98 | 1000   | -          | -           | 1.673913043             |
| Aldoa    | P05064 | 312  | ALQASALK(*)AWGGK(*)        | K8  | 57.02 | 86.16  | -          | -           | 0.954545455             |
| Aldoa    | P05064 | 28   | IVAPGK(*)GILAADESTGSIK(*)  | K6  | 47.28 | 135.22 | -          | 0.746666666 | 1.522727273 1.13469697  |
| Aldoa    | P05064 | 243  | MVTPGHAC(+57.02)TQK(*)FSI  | K11 | 29.13 | 1000   | 1.59574468 | 1.37333333  | - 1.484539007           |
| Tuba1b   | P05213 | 394  | LDHK(*)FDLMYAK(*)          | K4  | 79.4  | 170.44 | -          | -           | -                       |
| Tuba1b   | P05213 | 311  | HGK(*)YMAC(+57.02)C(+57.0  | K3  | 65.74 | 1000   | -          | -           | -                       |
| Tuba1b   | P05213 | 60   | TIGGGDDSFNTFFSETGAGK(*)    | K20 | 11.54 | 1000   | -          | -           | -                       |
| Ldha     | P06151 | 90   | SK(*)LVIITAGAR(*)          | K2  | 89.21 | 1000   | 1.11702127 | 1.06329113  | 0.955555556 1.045289324 |
| Ldha     | P06151 | 126  | IVK(*)YSPHC(+57.02)K(*)    | K3  | 22.06 | 108.85 | -          | 1.31645569  | -                       |
| Gpi      | P06745 | 25   | ANSANLK(*)LR(*)            | K7  | 80.9  | 1000   | -          | 1.06172839  | 1.054945051 1.058336725 |
| Gpi      | P06745 | 57   | ILVDYSK(*)NLVNK(*)         | K7  | 30.38 | 77.53  | -          | 1.61728395  | -                       |
| S100a4   | P07091 | 57   | TDEAAFQK(*)VMSNLDNSNR(*)   | K8  | 74.06 | 1000   | 1.03260869 | 0.79746835  | 1.045977011 0.958684687 |
| Anxa2    | P07356 | 227  | SVC(+57.02)HLQK(*)VFER(*)  | K7  | 97.31 | 1000   | -          | -           | 36.69662921             |
| Anxa2    | P07356 | 302  | SEVDMLK(*)IR(*)            | K7  | 43.44 | 1000   | -          | -           | 1.04494382              |
| Hsp90aa1 | P07901 | 568  | TK(*)FENLC(+57.02)K(*)     | K2  | 94.79 | 151.86 | 1.08421052 | 0.93589743  | 1.011235951 1.010447972 |
| Hsp90aa1 | P07901 | 574  | FENLC(+57.02)K(*)IMK(*)    | K6  | 91.78 | 1000   | 1.01052631 | 0.87179487  | 1.157303371 1.013208186 |
| Hsp90aa1 | P07901 | 568  | K(*)TK(*)FENLC(+57.02)K(*) | K3  | 86.25 | 36.05  | -          | 0.65384615  | 1.179775281 0.916810718 |
| Hsp90aa1 | P07901 | 447  | NIK(*)LGIHEDSQNR(*)        | K3  | 65.39 | 1000   | 1.01052631 | 0.93589743  | 1.011235951 0.985886569 |
| Hsp90aa1 | P07901 | 540  | EFEGK(*)TLVSVTK(*)         | K5  | 21.58 | 78.16  | -          | 1.82051282  | -                       |
| Hsp90aa1 | P07901 | 586  | K(*)VEK(*)VVVSNR(*)        | K4  | 16.1  | 44.44  | -          | -           | 1.213483146             |
| Pdia4    | P08003 | 347  | VSLGK(*)LVLTHPEK(*)        | K5  | 83.62 | 171.6  | 0.94845360 | 0.92592592  | 1 0.958126511           |
| Pdia4    | P08003 | 622  | DLEHLSK(*)FIDEHATK(*)      | K7  | 53.78 | 89.48  | -          | -           | 0.935483871             |
| Aprt     | P08030 | 7    | S(+42.01)EPELK(*)LVAR(*)   | K6  | 14.85 | 1000   | -          | 1.55434782  | -                       |
| Hsp90b1  | P08113 | 75   | SEK(*)FAFQAEVNR(*)         | K3  | 90.4  | 1000   | 1          | 0.975       | 0.946808511 0.97393617  |
| Hsp90b1  | P08113 | 479  | IADEK(*)YNDTFWK(*)         | K5  | 78.39 | 170.44 | 1          | 1           | 0.989361701 0.996453901 |
| Hsp90b1  | P08113 | 455  | ETLQQHK(*)LLK(*)           | K7  | 67.77 | 62.26  | -          | 0.8         | 1.255319141 1.027659575 |
| Hsp90b1  | P08113 | 493  | IK(*)LGVIEDHSNR(*)         | K2  | 66.7  | 1000   | 1.22448979 | 0.8875      | - 1.055994898           |
| Hsp90b1  | P08113 | 87   | MMK(*)LIINSLYK(*)          | K3  | 63.8  | 150.63 | 1.16326530 | 0.8875      | 0.776595741 0.942453684 |
| Hsp90b1  | P08113 | 493  | EFGTNIK(*)LGVIEDHSNR(*)    | K7  | 63.28 | 1000   | 1.02040816 | 0.9625      | 0.957446801 0.980118324 |
| Hsp90b1  | P08113 | 597  | EGVK(*)FDESEK(*)           | K4  | 27.27 | 95.35  | -          | 1.375       | 0.787234041 1.081117022 |
| S100a10  | P08207 | 57   | IMK(*)DLDQC(+57.02)R(*)    | K3  | 22.14 | 1000   | -          | 1.22826087  | 1.098901091 1.163580985 |
| Mdh2     | P08249 | 185  | ANTFVAELK(*)GLDPAR(*)      | K9  | 51.62 | 1000   | 0.98913043 | 0.60493827  | - 0.797034354           |
| Mdh2     | P08249 | 307  | NLGIGK(*)ITPFEEK(*)        | K6  | 28.93 | 81     | -          | 1.22222222  | -                       |
| P4hb     | P09103 | 273  | SVSDYDGK(*)LSSFK(*)        | K8  | 84.76 | 87.95  | 1.05050505 | 0.98734177  | 0.97826087 1.005369231  |

|          |        |      |                            |     |       |        |            |            |             |             |
|----------|--------|------|----------------------------|-----|-------|--------|------------|------------|-------------|-------------|
| P4hb     | P09103 | 226  | EK(*)LLDFIK(*)             | K2  | 79.02 | 101.67 | 0.97979798 | 1.05063291 | 0.98913043  | 1.00652044  |
| P4hb     | P09103 | 446  | VHSFPTLK(*)FFPASADR(*)     | K8  | 72.25 | 1000   | 0.94949494 | 0.78481012 | 1           | 0.911435025 |
| P4hb     | P09103 | 197  | SGVFSK(*)YQLDK(*)          | K6  | 27.46 | 127.18 | 1.35353535 | 1.49367088 | -           | 1.42360312  |
| Ncl      | P09405 | 431  | SK(*)GIAYIEFK(*)           | K2  | 73.19 | 170.86 | 1.13043478 | 0.91358024 | 1.12087912  | 1.054964717 |
| Ncl      | P09405 | 379  | VFGNEIK(*)LEK(*)PK(*)      | K7  | 49.61 | 78.06  | 0.53260869 | 1.03703703 | -           | 0.784822867 |
| Ncl      | P09405 | 372  | ALELTGLK(*)VFGNEIK(*)      | K8  | 37.87 | 137.02 | 1.77173913 | 1.41975308 | 1.37362637  | 1.521706197 |
| Ncl      | P09405 | 546  | EALNSC(+57.02)NK(*)MEIEGR  | K8  | 37.41 | 1000   | 2.66304347 | -          | 1.01098901  | 1.837016245 |
| Pgk1     | P09411 | 48   | AAVPSIK(*)FC(+57.02)LDNGAI | K7  | 82.31 | 118.18 | 1.09782608 | 0.975      | 1           | 1.024275362 |
| Pgk1     | P09411 | 11   | LTLDK(*)LDVK(*)            | K5  | 78.09 | 72.65  | 1.01086956 | 1.025      | 1.05813953  | 1.031336367 |
| Pgk1     | P09411 | 146  | AEPAK(*)IDAFR(*)           | K5  | 76.68 | 1000   | 1.09782608 | 0.8375     | 0.94186046  | 0.959062184 |
| Pgk1     | P09411 | 156  | ASLSK(*)LGDVYVNDAFGTAHR    | K5  | 75.92 | 1000   | 1.07608695 | 0.9625     | 1.10465116  | 1.04774604  |
| Pgk1     | P09411 | 6    | S(+42.01)LSNK(*)LTLDK(*)   | K5  | 68.77 | 119.54 | 1.10869565 | 0.8875     | -           | 0.998097826 |
| Pgk1     | P09411 | 91   | SLLGK(*)DVLFLK(*)          | K5  | 55.65 | 134.33 | 1.07608695 | -          | 1.09302325  | 1.084555107 |
| Pgk1     | P09411 | 353  | GTK(*)SLMDEVVK(*)          | K3  | 54.37 | 121.9  | 0.92391304 | 1.0375     | 1.75581395  | 1.239075665 |
| Pgk1     | P09411 | 220  | VADK(*)IQLINNMLDK(*)       | K4  | 48.27 | 192.46 | 1.61956521 | -          | -           |             |
| Anxa1    | P10107 | 242  | VFQNYGK(*)YSQHDMNK(*)      | K7  | 60.62 | 49.35  | -          | 0.92       | 1           | 0.96        |
| Anxa1    | P10107 | 262  | GDIEK(*)C(+57.02)LTTIVK(*) | K5  | 54.94 | 140.21 | 0.98947368 | 0.98666666 | 1.17241379  | 1.049518048 |
| Anxa1    | P10107 | 250  | YSQHDMNK(*)ALDLELK(*)      | K8  | 47.82 | 104.8  | 1.37894736 | 0.98666666 | 1.59770114  | 1.321105061 |
| Eef1a1   | P10126 | 146  | TLGVK(*)QLIVGVNK(*)        | K5  | 98.26 | 216.51 | 0.94680851 | 1.06578947 | 1.01162790  | 1.008075297 |
| Eef1a1   | P10126 | 392  | K(*)LEDGPK(*)FLK(*)        | K7  | 92.02 | 56.34  | 0.90425531 | 0.90789473 | 0.95348837  | 0.921879476 |
| Eef1a1   | P10126 | 392  | LEDGPK(*)FLK(*)            | K6  | 90.78 | 57.45  | 0.95744680 | 1          | 1.01162790  | 0.989691572 |
| Eef1a1   | P10126 | 41   | TIEK(*)FEK(*)              | K4  | 89.61 | 46.91  | -          | 1.07894736 | 1.06976744  | 1.074357405 |
| Txn      | P10639 | 85   | GQK(*)VGEFSGANK(*)         | K3  | 28.68 | 135.76 | -          | -          | 1.228915663 |             |
| Gstm1    | P10649 | 50   | SQWLNEK(*)FK(*)            | K7  | 28.71 | 22.85  | 1.14606741 | 0.77215189 | 1.31764705  | 1.078622125 |
| Gstm1    | P10649 | 136  | MK(*)LYSEFLGK(*)           | K2  | 20.72 | 113.97 | 1.42696629 | 1.79746835 | -           | 1.612217323 |
| Slc3a2   | P10852 | 53   | VAEDETEAGVK(*)FTGLSK(*)    | K11 | 47.85 | 34.81  | -          | 0.85897435 | -           |             |
| H1-0     | P10922 | 69   | VGENADSQIK(*)LSIK(*)       | K10 | 35.28 | 41.53  | 0.95098039 | 1.09638554 | 1.83116883  | 1.292844922 |
| H1-0     | P10922 | 85   | QTK(*)GVGASGSFR(*)         | K3  | 26.42 | 1000   | -          | 1.38554216 | 1.77922077  | 1.582381474 |
| Fn1      | P11276 | 1115 | IGFK(*)LGVR(*)             | K4  | 50.53 | 1000   | -          | 0.93243243 | -           |             |
| Fn1      | P11276 | 1049 | QYNVGPLASK(*)YPLR(*)       | K10 | 34.57 | 1000   | 1.16666666 | -          | 0.97674418  | 1.071705427 |
| Cdk1     | P11440 | 143  | GTIK(*)LADFGLAR(*)         | K4  | 84.25 | 1000   | 1.01111111 | 0.9375     | 0.95604395  | 0.968218356 |
| Hsp90ab1 | P11499 | 559  | AK(*)FENLC(+57.02)K(*)     | K2  | 98.93 | 151.86 | 1.07368421 | 0.93827160 | 1.20224719  | 1.071401002 |
| Hsp90ab1 | P11499 | 565  | FENLC(+57.02)K(*)LMK(*)    | K6  | 91.86 | 34.94  | 1.01052631 | 0.83950617 | 1.15730337  | 1.002445287 |
| Hsp90ab1 | P11499 | 64   | YESLTDPSK(*)LDSGK(*)       | K9  | 91.8  | 52.68  | 1.04210526 | 0.90123456 | 0.88764044  | 0.943660093 |

|          |        |     |                            |    |       |        |            |            |             |             |
|----------|--------|-----|----------------------------|----|-------|--------|------------|------------|-------------|-------------|
| Hsp90ab1 | P11499 | 275 | EK(*)YIDQEELNK(*)          | K2 | 87.39 | 206.63 | 1.03157894 | 0.93827160 | 0.94382022  | 0.971223592 |
| Hsp90ab1 | P11499 | 72  | ELK(*)IDIIPNPQER(*)        | K3 | 87.08 | 1000   | 1.05263157 | 0.86419753 | 1.01123595  | 0.976021688 |
| Hsp90ab1 | P11499 | 354 | NNIK(*)LYVR(*)             | K4 | 86.71 | 1000   | 1.01052631 | 1.04938271 | 0.98876404  | 1.016224359 |
| Hsp90ab1 | P11499 | 438 | NLK(*)LGIHEDSTNR(*)        | K3 | 85.97 | 1000   | 0.98947368 | 0.88888888 | 1.04494382  | 0.974435464 |
| Hsp90ab1 | P11499 | 531 | EFDGK(*)SLVSVTK(*)         | K5 | 74.93 | 112.7  | 0.85263157 | 0.92592592 | 0.97752809  | 0.918695198 |
| Hsp90ab1 | P11499 | 180 | GTK(*)VILHLK(*)            | K3 | 73.6  | 143.14 | 1.01052631 | 0.91358024 | 1.01123595  | 0.978447506 |
| Hsp90ab1 | P11499 | 435 | FYEAFSK(*)NLK(*)           | K7 | 59.14 | 47.36  | -          | 0.98765432 | 1.37078651  | 1.179220419 |
| Hsp90ab1 | P11499 | 354 | K(*)NNIK(*)LYVR(*)         | K5 | 56.51 | 61.69  | 1          | 0.72839506 | 1           | 0.909465021 |
| Hsp90ab1 | P11499 | 399 | EMLQQSK(*)ILK(*)           | K7 | 22.67 | 44.84  | 1.29473684 | -          | 1.44943820  | 1.372087522 |
| Hsp90ab1 | P11499 | 577 | K(*)VEK(*)VTISNR(*)        | K4 | 22.27 | 47.09  | -          | 0.71604938 | -           | -           |
| Hsp90ab1 | P11499 | 69  | LDSGK(*)ELK(*)             | K5 | 18.88 | 37.81  | -          | 1          | 1.03370786  | 1.016853933 |
| Hsp90ab1 | P11499 | 438 | NLK(*)LGIHEDSTNR(*)R(*)    | K3 | 13.75 | 1000   | -          | 1.41975308 | -           | -           |
| Hsp90ab1 | P11499 | 607 | IMK(*)AQALR(*)             | K3 | 12.09 | 1000   | -          | 1.04938271 | -           | -           |
| Tcp1     | P11983 | 484 | NLK(*)WIGLDLVHGK(*)        | K3 | 48.23 | 168.06 | 0.74736842 | 0.60759493 | 1.03225806  | 0.795740474 |
| Tcp1     | P11983 | 532 | IDDLIK(*)LHPESK(*)         | K6 | 35.42 | 68.66  | 1.45263157 | 1.30379746 | -           | 1.378214524 |
| Tcp1     | P11983 | 233 | IVNAK(*)IAC(+57.02)LDFSLQK | K5 | 32.46 | 183.74 | -          | -          | 1.989247312 | -           |
| Pfkl     | P12382 | 689 | AMLWVSEK(*)LR(*)           | K8 | 45.02 | 1000   | -          | 1.14814814 | -           | -           |
| Rpl7a    | P12970 | 217 | GALAK(*)LVEAIR(*)          | K5 | 75.88 | 1000   | 1.06       | 1.10389610 | 1.18681318  | 1.116903097 |
| Rpl7a    | P12970 | 97  | QTATQLLK(*)LAHK(*)         | K8 | 44.63 | 52.86  | -          | -          | 0.989010989 | -           |
| Rpl7a    | P12970 | 101 | LAHK(*)YR(*)PETK(*)        | K4 | 24.26 | 113.99 | 1.31       | 1.09090909 | 1.12087912  | 1.173929404 |
| Scd2     | P13011 | 208 | AEK(*)LVMFQR(*)            | K3 | 74.49 | 1000   | 1.10389610 | 1.51666666 | 1.51470588  | 1.378422884 |
| Scd2     | P13011 | 198 | GGK(*)LDMSDLK(*)           | K3 | 63.93 | 122.76 | -          | 1.06666666 | -           | -           |
| Gsn      | P13020 | 366 | TASDFISK(*)MQYPR(*)        | K8 | 57.37 | 1000   | 1.03260869 | 0.98684210 | 1.26136363  | 1.093604812 |
| Gsn      | P13020 | 243 | ATQVSK(*)GIR(*)            | K6 | 27.15 | 1000   | -          | 0.96052631 | -           | -           |
| S100a6   | P14069 | 40  | ELIQK(*)ELTIGSK(*)         | K5 | 86.45 | 110.43 | 0.80188679 | 0.8625     | 0.86868686  | 0.844357887 |
| S100a6   | P14069 | 47  | ELTIGSK(*)LQDAEIAR(*)      | K7 | 85.19 | 1000   | 0.83962264 | 0.9625     | 0.87878787  | 0.89363684  |
| S100a6   | P14069 | 35  | ELK(*)ELIQK(*)             | K3 | 73.7  | 115.97 | 0.94339622 | 0.9625     | 1.01010101  | 0.971999079 |
| S100a6   | P14069 | 26  | EGDK(*)HTLSK(*)            | K4 | 68.32 | 127.18 | 0.90566037 | 0.9875     | 0.88888888  | 0.927349755 |
| Rpl27a   | P14115 | 47  | INFDK(*)YHPGYFGK(*)        | K5 | 51.91 | 24.34  | -          | 0.97468354 | -           | -           |
| Rps16    | P14131 | 109 | EIK(*)DILIQYDR(*)          | K3 | 66.88 | 1000   | 1.13265306 | -          | 1.01063829  | 1.07164568  |
| Rps16    | P14131 | 98  | ALVAYYQK(*)YVDEASK(*)      | K8 | 57.52 | 128.65 | 0.81632653 | -          | -           | -           |
| Rps16    | P14131 | 90  | QSISK(*)ALVAYYQK(*)        | K5 | 20.81 | 92.08  | 1.63265306 | -          | -           | -           |
| Mdh1     | P14152 | 170 | SQIALK(*)LGV TADDVK(*)     | K6 | 37.89 | 161.52 | 0.82828282 | -          | 1.57303370  | 1.200658268 |
| Rpsa     | P14206 | 57  | TWEK(*)LLLAAR(*)           | K4 | 90.65 | 1000   | 0.88297872 | 0.88607594 | 1.01111111  | 0.926721928 |

|        |        |      |                              |     |       |        |            |            |             |             |
|--------|--------|------|------------------------------|-----|-------|--------|------------|------------|-------------|-------------|
| Rpsa   | P14206 | 89   | AVLK(*)FAAATGATPIAGR(*)      | K4  | 81.93 | 1000   | 0.95744680 | 0.96202531 | 0.98888888  | 0.969453671 |
| Calr   | P14211 | 64   | DK(*)GLQTSQDAR(*)            | K2  | 94.89 | 1000   | 1.04255319 | 1.0875     | 0.95555555  | 1.028536249 |
| Calr   | P14211 | 48   | SDFGK(*)FVLSSGK(*)           | K5  | 89.81 | 128.65 | 1.02127659 | 1.0125     | 1.05555555  | 1.029777384 |
| Calr   | P14211 | 55   | FVLSSGK(*)FYGDLEK(*)         | K7  | 82    | 98     | 1.02127659 | 0.9875     | 0.97777777  | 0.995518125 |
| Calr   | P14211 | 80   | FYALSAK(*)FEPFSNK(*)         | K7  | 72.4  | 100.04 | 1.51063829 | 0.7        | 0.92222222  | 1.04428684  |
| Calr   | P14211 | 111  | HEQNIDC(+57.02)GGGYVK(*)     | K13 | 39.58 | 127.49 | 1.96808510 | -          | 0.82222222  | 1.395153664 |
| Lmnb1  | P14733 | 135  | ESDLSGAQIK(*)LR(*)           | K10 | 84.93 | 1000   | 0.93684210 | 0.96202531 | 1           | 0.96628914  |
| Lmnb1  | P14733 | 103  | AK(*)LQIELGK(*)              | K2  | 76.73 | 138.97 | 1.12631578 | 1.01265822 | 0.93406593  | 1.02434665  |
| Lmnb1  | P14733 | 135  | K(*)ESDLSGAQIK(*)LR(*)       | K11 | 39.07 | 102.12 | -          | 0.74683544 | 0.96703296  | 0.856934205 |
| Lmnb1  | P14733 | 110  | LQIELGK(*)FK(*)              | K7  | 38.64 | 33.18  | 2          | 0.65822784 | -           | 1.329113924 |
| Anxa6  | P14824 | 81   | YELTGK(*)FER(*)              | K6  | 68.92 | 1000   | 1.25773195 | 1.07792207 | -           | 1.167827019 |
| Rplp0  | P14869 | 77   | GHLENNPALEK(*)LLPHIR(*)      | K11 | 86.6  | 1000   | 0.97849462 | 0.86075949 | 0.93333333  | 0.924195817 |
| H1-2   | P15864 | 85   | LGLK(*)SLVSK(*)              | K4  | 98.48 | 127.18 | 1.15116279 | 0.89156626 | 1.13698630  | 1.059905119 |
| H1-2   | P15864 | 106  | GTGASGSFK(*)LNK(*)           | K9  | 97.81 | 37.54  | -          | 0.86746988 | 1.17808219  | 1.022776036 |
| H1-2   | P15864 | 90   | SLVSK(*)GILVQTK(*)           | K5  | 54.84 | 170.44 | 1.20930232 | -          | 1.13698630  | 1.173144314 |
| Lgals1 | P16045 | 108  | LPDGHEFK(*)FPNR(*)           | K8  | 92.68 | 1000   | 0.86597938 | 0.79220779 | 0.97701149  | 0.878399556 |
| Lgals1 | P16045 | 19   | A(+42.01)C(+57.02)GLVASNLI   | K18 | 74.72 | 23.64  | 0.86597938 | 1.63636363 | 0.81609195  | 1.10614499  |
| Sptan1 | P16546 | 144  | GIK(*)LLQAQK(*)              | K3  | 58.64 | 132.53 | -          | 1.01315789 | -           | -           |
| Sptan1 | P16546 | 441  | EK(*)LSILSEER(*)             | K2  | 51.85 | 1000   | 1.11702127 | -          | 1.42857142  | 1.272796353 |
| Sptan1 | P16546 | 637  | AGQK(*)LIDVNHYAK(*)          | K4  | 44.82 | 130.84 | -          | 0.52631578 | -           | -           |
| Sptan1 | P16546 | 1419 | EK(*)LDILDQER(*)             | K2  | 43.42 | 1000   | 1.36170212 | 1.03947368 | 1.81318681  | 1.404787542 |
| Sptan1 | P16546 | 670  | LLEATELK(*)GIK(*)            | K8  | 42.17 | 26.52  | 0.55319148 | -          | -           | -           |
| Sptan1 | P16546 | 150  | LLQAQK(*)LVQYLR(*)           | K6  | 26.19 | 1000   | -          | 1.48684210 | -           | -           |
| Sptan1 | P16546 | 1334 | AK(*)LGDSHDLQR(*)            | K2  | 13.38 | 1000   | -          | -          | 1.087912088 | -           |
| Gapdh  | P16858 | 225  | VIPELNGK(*)LTGMAFR(*)        | K8  | 95.59 | 1000   | 1          | 0.80722891 | 1.02272727  | 0.94331873  |
| Gapdh  | P16858 | 192  | TVDGPSGK(*)LWR(*)            | K8  | 89.57 | 1000   | 0.85567010 | 0.85542168 | 0.96590909  | 0.892333627 |
| Gapdh  | P16858 | 252  | LEK(*)PAK(*)YDDIK(*)         | K6  | 71.75 | 56.34  | -          | 0.66265060 | 0.73863636  | 0.700643483 |
| Gapdh  | P16858 | 64   | AENGK(*)LVINGK(*)            | K5  | 64.64 | 129.72 | -          | -          | 0.72727272  | -           |
| Gapdh  | P16858 | 137  | FVMGVNHEK(*)YDNSLK(*)        | K9  | 16.29 | 28.13  | -          | 3.18072289 | -           | -           |
| Eno1   | P17182 | 406  | LAK(*)YNQILR(*)              | K3  | 92.29 | 1000   | 1.06382978 | 0.95180722 | 0.96703296  | 0.994223328 |
| Eno1   | P17182 | 60   | FMGK(*)GVSQAVEHINK(*)        | K4  | 87.31 | 195.68 | -          | 0.78313253 | 1.03296703  | 0.908049782 |
| Eno1   | P17182 | 92   | IDK(*)LMIEMDG TENK(*)        | K3  | 80.66 | 201.04 | 1          | 1.08433734 | 0.98901098  | 1.024449446 |
| Eno1   | P17182 | 256  | SGK(*)YDLDFK(*)              | K3  | 70.35 | 156.85 | 1.17021276 | 0.97590361 | 3.81318681  | 1.986434398 |
| Eno1   | P17182 | 335  | AASEK(*)SC(+57.02)NC(+57.02) | K5  | 60.65 | 139.75 | -          | 0.92771084 | 0.92307692  | 0.925393883 |

|          |        |      |                             |     |       |        |            |            |             |             |
|----------|--------|------|-----------------------------|-----|-------|--------|------------|------------|-------------|-------------|
| Ptbp1    | P17225 | 258  | IDFSK(*)LTSLNVK(*)          | K5  | 70.35 | 110.43 | 0.94736842 | 0.93421052 | 0.89247311  | 0.924684022 |
| Ptbp1    | P17225 | 83   | GK(*)VTNLLMLK(*)            | K2  | 40.6  | 132.11 | 0.78947368 | -          | -           | -           |
| Ptbp1    | P17225 | 265  | LTSLNVK(*)YNNDK(*)          | K7  | 30.86 | 47.64  | -          | 2.26315789 | -           | -           |
| Ppia     | P17742 | 131  | HVVFGK(*)VK(*)              | K6  | 95.4  | 36.05  | -          | 1.04819277 | 0.88043478  | 0.964313777 |
| Ppia     | P17742 | 82   | SIYGEK(*)FEDENFILK(*)       | K6  | 87.33 | 137.2  | 0.85       | 0.85542168 | 0.90217391  | 0.869198533 |
| Ppia     | P17742 | 44   | ALSTGEK(*)GFGYK(*)          | K7  | 83.57 | 82.34  | 0.85       | 0.89156626 | 0.94565217  | 0.89573948  |
| Ppia     | P17742 | 125  | TEWLDGK(*)HVVFGK(*)         | K7  | 82.22 | 87.26  | 0.96       | 0.97590361 | 0.92391304  | 0.953272219 |
| Ppia     | P17742 | 49   | GFGYK(*)GSSFHR(*)           | K5  | 78.09 | 1000   | -          | 0.95180722 | 1.01086956  | 0.981338397 |
| Tpi1     | P17751 | 238  | TATPQQAQEVHEK(*)LR(*)       | K13 | 87.72 | 1000   | -          | 0.85135135 | 0.94382022  | 0.897585788 |
| Tpi1     | P17751 | 199  | VVFEQTK(*)VIADNVK(*)        | K7  | 72.97 | 161.52 | 1.21978022 | 1.06756756 | 0.96629213  | 1.084546641 |
| Ctsd     | P18242 | 339  | VSSLPTVYLK(*)LG GK(*)       | K10 | 42.97 | 31.27  | 1.27659574 | 1.02666666 | -           | 1.151631206 |
| Cfl1     | P18760 | 132  | LTGIK(*)HELQANC(+57.02)YEE  | K5  | 91.55 | 186.68 | 1.12244898 | 0.94805194 | 1.01162790  | 1.027376278 |
| Cfl1     | P18760 | 114  | SK(*)MIYASSK(*)             | K2  | 87.01 | 128.79 | -          | 1          | 1.17441860  | 1.087209303 |
| Cfl1     | P18760 | 19   | VFNDMK(*)VR(*)              | K6  | 66.68 | 1000   | 1.07142857 | 1.18181818 | 0.98837209  | 1.080539615 |
| Cfl1     | P18760 | 132  | LTGIK(*)HELQANC(+57.02)YEE  | K5  | 65.67 | 151.17 | 1.19387755 | 1.42857142 | 0.91860465  | 1.18035121  |
| Fasn     | P19096 | 673  | QEGVFAK(*)EVR(*)            | K7  | 39.3  | 1000   | 1.64210526 | 2.75641025 | 2.09782608  | 2.165447202 |
| Fasn     | P19096 | 1143 | ELQLC(+57.02)K(*)GLAR(*)    | K6  | 24.88 | 1000   | -          | 1.46153846 | -           | -           |
| Rpl13a   | P19253 | 191  | IC(+57.02)K(*)FTEVLK(*)     | K3  | 74.89 | 113.99 | 0.94117647 | 0.82716049 | 1.05263157  | 0.940322848 |
| Rpl13a   | P19253 | 191  | K(*)IC(+57.02)K(*)FTEVLK(*) | K4  | 59.47 | 38.16  | 0.78431372 | 0.80246913 | -           | 0.793391431 |
| Rpl13a   | P19253 | 148  | LAHEVGWK(*)YQAVTATLEEK(*)   | K8  | 55.7  | 156.9  | 1.12745098 | 0.54320987 | 1.44210526  | 1.037588707 |
| Serpinh1 | P19324 | 100  | AVLSAEK(*)LR(*)             | K7  | 83.75 | 1000   | 0.92857142 | 0.77215189 | 0.97894736  | 0.893223565 |
| Serpinh1 | P19324 | 34   | K(*)PLEAAAPGTAEK(*)LSSK(*)  | K13 | 76.45 | 88.98  | 0.94897959 | 0.86075949 | 0.81052631  | 0.873421801 |
| Serpinh1 | P19324 | 318  | GVVEVTHDLQK(*)HLAGLGLTE     | K11 | 25.57 | 24.74  | -          | 1.77215189 | -           | -           |
| Serpinh1 | P19324 | 212  | PHWDEK(*)FH HK(*)           | K6  | 21.38 | 82.24  | -          | 1.37974683 | -           | -           |
| Serpinh1 | P19324 | 38   | LSSK(*)ATTLAER(*)           | K4  | 17.09 | 1000   | -          | -          | 1.178947368 | -           |
| Hspa5    | P20029 | 327  | AK(*)FEELNMDLFR(*)          | K2  | 70.58 | 1000   | 1.12765957 | 1.02439024 | 0.96703296  | 1.039694262 |
| Hspa5    | P20029 | 548  | MVNDAEK(*)FAEEDK(*)K(*)     | K7  | 46.96 | 84.46  | 0.82978723 | 0.75609756 | -           | 0.792942398 |
| Hspa5    | P20029 | 345  | PVQK(*)VLESDLK(*)           | K4  | 16.43 | 101.72 | -          | 1          | -           | -           |
| Vim      | P20152 | 188  | EK(*)LQEEMLQR(*)            | K2  | 97.06 | 1000   | 0.95833333 | 1.01265822 | 0.94444444  | 0.971812002 |
| Vim      | P20152 | 294  | SK(*)FADLSEAANR(*)          | K2  | 91.03 | 1000   | 0.88541666 | 1.03797468 | 0.98888888  | 0.97076008  |
| Vim      | P20152 | 120  | FANYIDK(*)VR(*)             | K7  | 68.52 | 1000   | 1.05208333 | 0.97468354 | 1           | 1.008922292 |
| Vim      | P20152 | 104  | TNEK(*)VELQELNDR(*)         | K4  | 50.03 | 1000   | 1.19791666 | 0.84810126 | -           | 1.023008967 |
| Prkca    | P20444 | 172  | AEVTDEK(*)LHVTVR(*)         | K7  | 15.95 | 1000   | -          | 0.89873417 | -           | -           |
| Tpm3     | P21107 | 232  | ILTDK(*)LK(*)               | K5  | 60.36 | 33.18  | -          | 1.27710843 | -           | -           |



|        |        |      |                         |     |       |        |            |            |            |             |
|--------|--------|------|-------------------------|-----|-------|--------|------------|------------|------------|-------------|
| Ubl4a  | P21126 | 33   | HLVSDK(*)LNPVVR(*)      | K6  | 17.14 | 1000   | 1.21590909 | -          | 0.94565217 | 1.080780633 |
| Eno3   | P21550 | 275  | HISGEK(*)LGELYK(*)      | K6  | 12.85 | 53.23  | 3.05263157 | -          | -          | -           |
| Cbx3   | P23198 | 50   | VEYFLK(*)WK(*)          | K6  | 23.58 | 39.76  | 1.71559633 | -          | -          | -           |
| Bcat1  | P24288 | 368  | ILGK(*)LTDIQYGR(*)      | K4  | 22.2  | 1000   | 1.45652173 | -          | -          | -           |
| Ppib   | P24369 | 165  | TSWLDGK(*)HVVFGK(*)     | K7  | 32.65 | 102.87 | -          | 1.59493670 | -          | -           |
| Rps2   | P25444 | 65   | AEDK(*)EWIPVTK(*)LGR(*) | K11 | 76.52 | 148.49 | 0.98979591 | 0.87654321 | 0.90109890 | 0.922479343 |
| Rps2   | P25444 | 65   | EWIPVTK(*)LGR(*)        | K7  | 66.68 | 1000   | 0.94897959 | 0.77777777 | 1.07692307 | 0.934560149 |
| Tln1   | P26039 | 1314 | GISMSSSK(*)LLLAOK(*)    | K8  | 61.32 | 113.99 | -          | 0.96103896 | -          | -           |
| Tln1   | P26039 | 1306 | AQVVSNLK(*)GISMSSSK(*)  | K8  | 61.24 | 135.04 | 0.95789473 | 0.96103896 | 0.88043478 | 0.933122827 |
| Tln1   | P26039 | 1544 | TIK(*)ALDGDFTENR(*)     | K3  | 35.33 | 1000   | -          | 1.87012987 | -          | -           |
| Ezr    | P26040 | 79   | K(*)ENPVQFK(*)FR(*)     | K8  | 40.32 | 67.87  | 1.74509803 | -          | -          | -           |
| Msn    | P26041 | 79   | ESPLLFK(*)FR(*)         | K7  | 90.77 | 1000   | 1.18947368 | 0.71604938 | 0.95555555 | 0.953692874 |
| Msn    | P26041 | 388  | AQSEAEK(*)LAK(*)        | K7  | 83.6  | 40.63  | 1.07368421 | 0.88888888 | 0.97777777 | 0.980116959 |
| Msn    | P26041 | 79   | K(*)ESPLLFK(*)FR(*)     | K8  | 74.1  | 118.17 | 0.74736842 | 0.67901234 | 0.93333333 | 0.786571367 |
| Msn    | P26041 | 350  | EK(*)EELMEK(*)LK(*)     | K8  | 61.98 | 22.85  | 0.96842105 | 0.91358024 | 0.93333333 | 0.938444878 |
| Msn    | P26041 | 151  | SGYLAGDK(*)LLPQR(*)     | K8  | 61.6  | 1000   | -          | 1.39506172 | -          | -           |
| Msn    | P26041 | 60   | AFSTWLK(*)LNK(*)        | K7  | 60.57 | 30.72  | 0.85263157 | -          | 0.92222222 | 0.887426901 |
| Msn    | P26041 | 523  | HLK(*)ALTSELANAR(*)     | K3  | 50.92 | 1000   | 0.86315789 | 0.74074074 | 1.03333333 | 0.879077323 |
| Msn    | P26041 | 27   | TTGK(*)QLFDQVVK(*)      | K4  | 50.81 | 115.01 | 2.86315789 | 0.67901234 | -          | 1.771085121 |
| Msn    | P26041 | 162  | VLEQHK(*)LNK(*)         | K6  | 34.63 | 40.63  | 0          | -          | -          | -           |
| Rdx    | P26043 | 79   | K(*)ENPLQFK(*)FR(*)     | K8  | 48.82 | 51.59  | 1.09574468 | 0.73076923 | -          | 0.913256956 |
| Ctnna1 | P26231 | 163  | VVEDGILK(*)LR(*)        | K8  | 29.95 | 1000   | 0.94949494 | 1.84810126 | -          | 1.398798108 |
| Glud1  | P26443 | 84   | GASIVEDK(*)LVEDLK(*)    | K8  | 48.82 | 108.85 | 0.84693877 | 0.86419753 | 1.47252747 | 1.06122126  |
| Glud1  | P26443 | 527  | TAMK(*)YNLGLDLR(*)      | K4  | 27.16 | 1000   | 1.73469387 | 1.22222222 | -          | 1.47845805  |
| Psmc7  | P26516 | 204  | GLNSK(*)LLDIR(*)        | K5  | 69.52 | 1000   | 1.08421052 | -          | 1.06666666 | 1.075438597 |
| Psmc7  | P26516 | 199  | ITNQVHGLK(*)GLNSK(*)    | K9  | 38.48 | 61.26  | 1.47368421 | 1.31645569 | 1.1        | 1.296713302 |
| Marcks | P26645 | 158  | SFK(*)LSGFSFK(*)        | K3  | 14.61 | 115.21 | 1.5        | -          | -          | -           |
| Man2a1 | P27046 | 1103 | MSVLK(*)LFNK(*)         | K5  | 31    | 87.62  | -          | 1.26582278 | -          | -           |
| Snrbp  | P27048 | 8    | SSK(*)MLQHIDYR(*)       | K3  | 56.99 | 1000   | -          | 0.87804878 | 0.91578947 | 0.896919127 |
| Rpl3   | P27659 | 373  | FIDTTSK(*)FGHGR(*)      | K7  | 83.88 | 1000   | 1.02040816 | 1.01265822 | 0.91666666 | 0.983244353 |
| Rpl3   | P27659 | 366  | IDLK(*)FIDTTSK(*)       | K4  | 77.98 | 96.04  | 0.92857142 | 1.02531645 | 0.90625    | 0.953379295 |
| Rpl3   | P27659 | 286  | IYK(*)IGQGYLIK(*)       | K3  | 76.49 | 161.77 | 1.15306122 | 1.07594936 | 1.08333333 | 1.104114641 |
| Rpl3   | P27659 | 229  | GYK(*)GVTSR(*)          | K3  | 72.32 | 1000   | 1.10204081 | 1.05063291 | 0.98958333 | 1.04741902  |
| Pdia3  | P27773 | 335  | GEK(*)FVMQEEFSR(*)      | K3  | 87.32 | 1000   | 0.93069306 | 0.81707317 | 0.95789473 | 0.901886992 |

|          |        |     |                             |        |       |        |            |            |             |             |
|----------|--------|-----|-----------------------------|--------|-------|--------|------------|------------|-------------|-------------|
| Pdia3    | P27773 | 296 | FLDAGHK(*)LNFAVASR(*)       | K7     | 66.68 | 1000   | 0.93069306 | 0.90243902 | 1           | 0.944377364 |
| Pdia3    | P27773 | 214 | PLHLANK(*)FEDK(*)           | K7     | 53.13 | 81.18  | -          | 0.69512195 | 0.83157894  | 0.763350449 |
| Pdia3    | P27773 | 218 | FEDK(*)TVAYTEK(*)           | K4     | 38.04 | 142.27 | -          | 2.32926829 | 1.38947368  | 1.859370989 |
| Adh5     | P28474 | 120 | VTQGK(*)GLMPDGTSR(*)        | K5     | 37.61 | 1000   | -          | -          | 0.290697674 |             |
| Bgn      | P28653 | 220 | ISEAK(*)LTGIPK(*)           | K5     | 32.33 | 102.61 | -          | -          | 1.62        |             |
| Nap1l1   | P28656 | 82  | VNALK(*)NLQVK(*)            | K5     | 68.01 | 107.29 | 1.01123595 | 1.20779220 | 0.94117647  | 1.053401545 |
| Nap1l1   | P28656 | 82  | R(*)VNALK(*)NLQVK(*)        | K6     | 49.09 | 76.17  | -          | 1.22077922 | -           |             |
| Pabpc1   | P29341 | 213 | ELFGK(*)FGPALSVK(*)         | K5     | 70.17 | 70.68  | 0.38541666 | -          | 1.06451612  | 0.724966398 |
| Pabpc1   | P29341 | 512 | TVPQYK(*)YAAGVR(*)          | K6     | 30.73 | 1000   | 1.67708333 | 0.1625     | 1.22580645  | 1.021796595 |
| Oat      | P29758 | 374 | GK(*)GLLNAIVIR(*)           | K2     | 64.69 | 1000   | 0.94174757 | 0.82716049 | 0.90109890  | 0.890002323 |
| Oat      | P29758 | 107 | SQVDK(*)LTLTSR(*)           | K5     | 37.68 | 1000   | 1          | -          | 0.73626373  | 0.868131868 |
| Fkbp4    | P30416 | 354 | ALELDSNNEK(*)GLFR(*)        | K10    | 54.84 | 1000   | 0.72916666 | 0.7375     | -           | 0.733333334 |
| Hmgb2    | P30681 | 59  | SK(*)FEDLAK(*)              | K2     | 44.47 | 121.92 | 1.23863636 | 1.07042253 | 1.33333333  | 1.214130744 |
| Dbi      | P31786 | 55  | AK(*)WDSWNN(*)              | K2     | 68.62 | 143.14 | -          | -          | 0.931034483 |             |
| Dbi      | P31786 | 61  | WDSWNN(*)LK(*)              | K6     | 54.16 | 26.31  | 1          | 0.60526315 | 0.80459770  | 0.803286953 |
| Ssb      | P32067 | 228 | ALEGK(*)MGC(+57.02)LLK(*)   | K5     | 53.52 | 85.52  | -          | 0.82278481 | 1.19101123  | 1.006898023 |
| Ssb      | P32067 | 78  | AK(*)LMEVSADK(*)            | K2     | 51.39 | 98.53  | -          | -          | 0.595505618 |             |
| Ssb      | P32067 | 303 | VTWK(*)VLEGHAEK(*)          | K4     | 12.12 | 99.23  | -          | -          | 1.426966292 |             |
| Serpinc1 | P32261 | 261 | SK(*)FSPENTR(*)             | K2     | 21.04 | 1000   | -          | 0          | 0           | 0           |
| Ranbp1   | P34022 | 182 | VAEK(*)LEALSVR(*)           | K4     | 66.13 | 1000   | 1.13636363 | 0.92207792 | 1.06818181  | 1.042207792 |
| Mif      | P34884 | 78  | NYSK(*)LLC(+57.02)GLLSDR(*) | K4     | 95.91 | 1000   | 1.15306122 | 1.09589041 | 0.95698924  | 1.068646961 |
| Rab18    | P35293 | 58  | AK(*)LAIWDTAGQER(*)         | K2     | 38.28 | 1000   | 1.56862745 | -          | -           |             |
| Fbl      | P35550 | 149 | SK(*)LAAAILGGVDQIHIK(*)     | PG, K2 | 49.01 | 170.87 | 0.6875     | -          | -           |             |
| Canx     | P35564 | 119 | LPGDK(*)GLVLMSR(*)          | K5     | 93.58 | 1000   | 1          | 1.01298701 | 0.94444444  | 0.985810486 |
| Canx     | P35564 | 104 | YDGK(*)WEVDEMK(*)           | K4     | 52.97 | 72.34  | 1.28125    | 1.36363636 | -           | 1.322443182 |
| Canx     | P35564 | 114 | ETK(*)LPGDK(*)              | K3     | 14.04 | 41.96  | -          | -          | 1.04444444  |             |
| Prdx1    | P35700 | 136 | GLFIIDDK(*)GILR(*)          | K8     | 50.26 | 1000   | 1.30107526 | 1.07407407 | 1.24418604  | 1.20644513  |
| Rpl12    | P35979 | 54  | ATGDWK(*)GLR(*)             | K6     | 74.16 | 1000   | 0.98901098 | 0.94047619 | 1.06818181  | 0.999222999 |
| Rpl12    | P35979 | 61  | ITVK(*)LTIQNR(*)            | K4     | 33.99 | 1000   | -          | 1.11904761 | 1.42045454  | 1.269751082 |
| Rpl18    | P35980 | 97  | ILEVPK(*)LK(*)              | K6     | 58.72 | 20.41  | 1.35483871 | -          | -           |             |
| Rpl18    | P35980 | 30  | LLVK(*)LYR(*)               | K4     | 18.56 | 1000   | -          | 1.33333333 | -           |             |
| Sar1a    | P36536 | 146 | TDAISEEK(*)LR(*)            | K8     | 69.64 | 1000   | -          | 0.67469879 | -           |             |
| Sar1a    | P36536 | 27  | SGK(*)LVFLGLDNAGK(*)        | K3     | 67.89 | 223.6  | 0.69747899 | 0.90361445 | 0.875       | 0.825364483 |
| Hspa9    | P38647 | 345 | HLNMK(*)LTR(*)              | K5     | 76.37 | 1000   | -          | 0.77215189 | -           |             |



|         |        |     |                            |     |       |        |            |            |             |             |
|---------|--------|-----|----------------------------|-----|-------|--------|------------|------------|-------------|-------------|
| Tkt     | P40142 | 327 | AYGLALAK(*)LGHASDR(*)      | K8  | 56.19 | 1000   | 1.2        | 1.05194805 | -           | 1.125974026 |
| Tkt     | P40142 | 465 | AVELAANTK(*)GIC(+57.02)FIR | K9  | 20.95 | 1000   | -          | 0.68831168 | 0.60869565  | 0.64850367  |
| Rpl28   | P41105 | 101 | NK(*)YR(*)PDLR(*)          | K2  | 70.18 | 1000   | 1.03883495 | -          | -           | -           |
| Cd63    | P41731 | 138 | TATILDK(*)LQK(*)           | K7  | 25.43 | 53.53  | -          | 1.08064516 | -           | -           |
| Cct8    | P42932 | 466 | ANEVISK(*)LYSVHQEGNK(*)    | K7  | 79.25 | 68.81  | 0.89795918 | 0.9875     | 0.81914893  | 0.90153604  |
| Cct8    | P42932 | 62  | LEK(*)LFVTNDAATILR(*)      | K3  | 62.93 | 1000   | 0.91836734 | 1.05       | 1.07446808  | 1.014278477 |
| Cct8    | P42932 | 318 | LNSK(*)WDLR(*)             | K4  | 20    | 1000   | -          | -          | 1.425531915 | -           |
| H1-4    | P43274 | 90  | SLVSK(*)GTLVQTK(*)         | K5  | 28.45 | 115.21 | -          | 1.68115942 | -           | -           |
| H1-1    | P43275 | 87  | LGLK(*)SLVNK(*)            | K4  | 93.94 | 98.37  | 1.13186813 | 1.11764705 | 1.1         | 1.116505064 |
| H1-1    | P43275 | 108 | GTGAAGSFK(*)LNK(*)         | K9  | 86.84 | 47.36  | 1.14285714 | 1.07352941 | 1.1625      | 1.126295518 |
| Akr1b1  | P45376 | 78  | IVSK(*)LWC(+57.02)TFHDK(*) | K4  | 17.49 | 107.73 | 1.5        | 1.01219512 | -           | 1.256097561 |
| Rangap1 | P46061 | 31  | GLK(*)LNTAEDAK(*)          | K3  | 55.9  | 154.74 | 0.90909090 | 0.93670886 | 1.20212766  | 1.01597581  |
| Aldh2   | P47738 | 443 | ANDSK(*)YGLAAAVFTK(*)      | K5  | 36.28 | 187.48 | 1.58585858 | 2.01265822 | -           | 1.799258407 |
| Capza1  | P47753 | 97  | NQISFK(*)FDHLR(*)          | K6  | 32.69 | 1000   | 1.56989247 | 1.49295774 | -           | 1.53142511  |
| Capza2  | P47754 | 97  | IC(+57.02)FK(*)FDHLR(*)    | K4  | 30.58 | 1000   | -          | 0.74418604 | 1.45        | 1.097093024 |
| Rpl6    | P47911 | 247 | EK(*)YEITEQR(*)            | K2  | 89.19 | 1000   | -          | 1.11538461 | 1.06666666  | 1.091025641 |
| Rpl6    | P47911 | 200 | THQK(*)FVIATSTK(*)         | K4  | 82.41 | 131.72 | 0.86538461 | 1.05128205 | 0.98888888  | 0.968518518 |
| Rpl6    | P47911 | 218 | IPK(*)HLTDAYFK(*)          | K3  | 67.77 | 171.6  | -          | 1.05128205 | 0.98888888  | 1.02008547  |
| Rpl29   | P47915 | 101 | LAFIAHPK(*)LGK(*)          | K8  | 85.05 | 49.37  | 1.11111111 | 0.94666666 | 1.03571428  | 1.031164021 |
| Rpl29   | P47915 | 33  | YESLK(*)GVDPK(*)           | K5  | 34.61 | 81.69  | -          | 3.54666666 | 1.25        | 2.398333334 |
| Rpl5    | P47962 | 48  | YNTPK(*)YR(*)              | K5  | 76.5  | 1000   | 1          | 0.88505747 | -           | 0.942528736 |
| Rpl5    | P47962 | 43  | NK(*)YNTPK(*)              | K2  | 62.52 | 68.6   | -          | -          | 0.989690722 | -           |
| Rpl5    | P47962 | 158 | TTGNK(*)VFGALK(*)          | K6  | 54.66 | 85.52  | -          | 0.70114942 | -           | -           |
| Rpl5    | P47962 | 270 | WNR(*)PK(*)MSLAQK(*)       | K5  | 13.05 | 69.64  | -          | -          | 1.360824742 | -           |
| Rpl13   | P47963 | 123 | SK(*)LILFPR(*)             | K2  | 48.18 | 1000   | 1.19791666 | 1.24       | 1.68131868  | 1.373078449 |
| Anxa5   | P48036 | 74  | SELTGK(*)FEK(*)            | K6  | 93.11 | 57.45  | 0.90526315 | 0.79487179 | 0.98863636  | 0.896257106 |
| Anxa5   | P48036 | 56  | QEIAQEFK(*)TLFGR(*)        | K8  | 39.71 | 1000   | -          | 1.66666666 | 0.75        | 1.208333334 |
| Lmna    | P48678 | 270 | TYSAK(*)LDNAR(*)           | K5  | 95.68 | 1000   | -          | 1.01282051 | 0.96590909  | 0.989364802 |
| Lmna    | P48678 | 171 | GQVAK(*)LEAALGEAK(*)       | K5  | 85.92 | 206.63 | 0.81443299 | 0.88461538 | 0.98863636  | 0.895894913 |
| Lmna    | P48678 | 135 | LK(*)DLEALLNSK(*)          | K2  | 73.57 | 203.33 | 1.01030927 | 1          | 0.98863636  | 0.999648547 |
| Lmna    | P48678 | 450 | VAVEEVDEEGK(*)FVR(*)       | K11 | 40.75 | 1000   | 1.02061855 | 0.75641025 | 1.70454545  | 1.160524756 |
| Hnrnpa1 | P49312 | 166 | IVIQK(*)YHTVNGHNC(+57.02)  | K5  | 20    | 1000   | -          | 1.36708860 | -           | -           |
| Cav1    | P49817 | 57  | EIDLVNR(*)DPK(*)HLNDDVVK   | K10 | 45.3  | 53.45  | -          | 0.85333333 | -           | -           |
| Ahcy    | P50247 | 188 | SK(*)FDNLYGC(+57.02)R(*)   | K2  | 61.53 | 1000   | 0.90526315 | 1.07792207 | 0.95604395  | 0.979743064 |

|         |        |     |                           |     |       |        |            |            |             |             |
|---------|--------|-----|---------------------------|-----|-------|--------|------------|------------|-------------|-------------|
| Ahcy    | P50247 | 401 | K(*)LDEAVAEHLGK(*)LNVK(*) | K13 | 46.59 | 25.7   | -          | 0.76623376 | 0.59340659  | 0.67982018  |
| S100a11 | P50543 | 50  | NQK(*)DPGVLDR(*)          | K3  | 73.11 | 1000   | -          | 1.125      | 1.05434782  | 1.089673913 |
| Pa2g4   | P50580 | 22  | YK(*)MGGDIANR(*)          | K2  | 45.65 | 1000   | -          | 1.24691358 | -           | -           |
| Rpl9    | P51410 | 121 | NFLGEK(*)YIR(*)           | K6  | 81.66 | 1000   | 1.06315789 | 1.025      | 0.90804597  | 0.998734624 |
| Slc25a5 | P51881 | 155 | EFK(*)GLGDC(+57.02)LVK(*) | K3  | 78.33 | 124.34 | 1.17391304 | 1.24285714 | 0.97777777  | 1.131515988 |
| Slc25a5 | P51881 | 33  | VK(*)LLLQVQHASK(*)        | K2  | 77.85 | 250.23 | 1.09782608 | 1.12857142 | 1.1         | 1.108799172 |
| Pkm     | P52480 | 270 | IISK(*)IENHEGVR(*)        | K4  | 79.42 | 1000   | -          | 0.875      | 1.02197802  | 0.948489011 |
| Pkm     | P52480 | 141 | GATLK(*)ITLDNAYMEK(*)     | K5  | 52.7  | 207.58 | -          | 1.4625     | -           | -           |
| Pkm     | P52480 | 498 | VNLAMDVGK(*)AR(*)         | K9  | 43.11 | 1000   | -          | -          | 1.043956044 | -           |
| Pkm     | P52480 | 166 | NIC(+57.02)K(*)VVEVGSK(*) | K4  | 28.23 | 120.29 | -          | 1.3375     | 1.72527472  | 1.531387363 |
| Sult1a1 | P52840 | 118 | LLDQK(*)IK(*)             | K5  | 16.77 | 22.85  | -          | -          | -           | -           |
| Rpl10a  | P53026 | 156 | STIK(*)FQMK(*)            | K4  | 69.95 | 88.98  | -          | 0.97590361 | 0.93548387  | 0.955693743 |
| Rpl10a  | P53026 | 133 | AGK(*)FPSLLTHNENMVAK(*)   | K3  | 37.35 | 88.07  | 2.27956989 | 1.46987951 | 0.81720430  | 1.522217904 |
| Slc16a1 | P53986 | 235 | GEK(*)LSVFQTINK(*)        | K3  | 58.57 | 181.94 | -          | 0.80487804 | -           | -           |
| Idh2    | P54071 | 384 | GK(*)LDGNQDLIR(*)         | K2  | 69.5  | 1000   | -          | 0.71428571 | 0.80898876  | 0.761637239 |
| Idh2    | P54071 | 69  | EK(*)LILPHVDVQLK(*)       | K2  | 21.24 | 134.4  | -          | 2.58441558 | -           | -           |
| Rad23b  | P54728 | 45  | DAFPVAGQK(*)LIYAGK(*)     | K9  | 76.44 | 94.27  | 1.02173913 | 1.04109589 | 0.92045454  | 0.994429855 |
| Atp5mf  | P56135 | 48  | YYNK(*)YINVR(*)           | K4  | 30.24 | 1000   | -          | 1.5        | -           | -           |
| Atp5f1b | P56480 | 201 | GGK(*)IGLFGGAGVGK(*)      | K3  | 72.53 | 178.02 | 1.09375    | 0.8875     | 1.02127659  | 1.000842199 |
| Atp5f1b | P56480 | 124 | GQK(*)VLDSGAPIK(*)        | K3  | 46.89 | 140.39 | -          | 0.7375     | -           | -           |
| Atp5f1b | P56480 | 480 | MGK(*)LVPLK(*)            | K3  | 12.94 | 95.62  | 2.07291666 | -          | -           | -           |
| Eef1d   | P57776 | 17  | FK(*)YDDAER(*)            | K2  | 83.1  | 1000   | -          | 0.97590361 | 1           | 0.987951807 |
| Eef1d   | P57776 | 15  | IWFDK(*)FK(*)             | K5  | 64.43 | 28.86  | 1.24210526 | 1.02409638 | -           | 1.133100825 |
| Actn4   | P57780 | 418 | LDHLAEK(*)FR(*)           | K7  | 81.44 | 1000   | 1.125      | 1.07692307 | 1.01098901  | 1.070970696 |
| Actn4   | P57780 | 332 | TIQEMQQK(*)LEDGR(*)       | K8  | 60.6  | 1000   | 1          | 0.94871794 | 0.82417582  | 0.924297924 |
| Actn4   | P57780 | 123 | ALDFIASK(*)GVK(*)         | K8  | 48.81 | 32.97  | -          | 1.05128205 | -           | -           |
| Actn4   | P57780 | 115 | INNPNK(*)ALDFIASK(*)      | K6  | 45.78 | 142.27 | 1          | -          | -           | -           |
| Snrpa1  | P57784 | 221 | LK(*)GLLQSGQIPGR(*)       | K2  | 28.3  | 1000   | 1.18556701 | -          | -           | -           |
| Snrpa1  | P57784 | 67  | LK(*)TLLVNNNR(*)          | K2  | 14.3  | 1000   | -          | 1.23456790 | -           | -           |
| Idi1    | P58044 | 192 | AASGEIK(*)LTPWFK(*)       | K7  | 22.1  | 90.32  | 1.27659574 | -          | -           | -           |
| Eef2    | P58252 | 498 | VMK(*)FSVSPVVR(*)         | K3  | 95.43 | 1000   | 0.96842105 | 0.9        | 0.95744680  | 0.941955954 |
| Eef2    | P58252 | 318 | LIEK(*)LDIK(*)            | K4  | 93.46 | 109.97 | 1.06315789 | 1.0125     | 0.92553191  | 1.000396603 |
| Eef2    | P58252 | 322 | LDIK(*)LDSEDK(*)DK(*)     | K4  | 83.21 | 113.99 | 0.93684210 | 0.95       | 0.91489361  | 0.933911907 |
| Eef2    | P58252 | 235 | QFAEMYVAK(*)FAAK(*)       | K9  | 80.39 | 59.3   | 0.91578947 | 0.95       | 0.98936170  | 0.951717059 |

|        |        |     |                             |     |       |        |            |            |             |             |
|--------|--------|-----|-----------------------------|-----|-------|--------|------------|------------|-------------|-------------|
| Eef2   | P58252 | 426 | VFSGVVSTGLK(*)VVR(*)        | K11 | 71.55 | 1000   | 1.04210526 | 1.05       | 1.05319148  | 1.048432251 |
| Eef2   | P58252 | 400 | ISK(*)MVPTSDK(*)            | K3  | 69.99 | 94.43  | 1          | 1.2375     | 1           | 1.079166667 |
| Eef2   | P58252 | 314 | K(*)EETAK(*)LIEK(*)         | K6  | 51.46 | 61.3   | -          | -          | 1.159574468 |             |
| Eef2   | P58252 | 226 | TLK(*)QFAEMYVAK(*)          | K3  | 24.44 | 141.67 | -          | -          | 1.79787234  |             |
| Eef2   | P58252 | 400 | YISK(*)MVPTSDK(*)           | K4  | 12.98 | 51.59  | -          | -          | 1.606382979 |             |
| Tpm1   | P58771 | 12  | MQMLK(*)LDK(*)              | K5  | 94.93 | 62.26  | 0.98936170 | 0.93506493 | 1.10588235  | 1.010102997 |
| Tpm1   | P58771 | 112 | LATALQK(*)LEEAKE(*)         | K7  | 88.64 | 121.92 | 0.82978723 | 0.93506493 | 0.95294117  | 0.905931115 |
| Tpm1   | P58771 | 231 | VLSDK(*)LK(*)               | K5  | 84.52 | 27.16  | 1.08510638 | 1          | 1.2         | 1.095035461 |
| Tpm1   | P58771 | 70  | DAQEK(*)LELAKE(*)           | K5  | 80.28 | 151.86 | 1.86170212 | 0.89610389 | 2.17647058  | 1.644758871 |
| Tpm1   | P58771 | 152 | EAK(*)HIAEDADR(*)           | K3  | 72.03 | 1000   | 1.06382978 | 0.98701298 | 1.11764705  | 1.056163278 |
| Tpm1   | P58771 | 205 | TVTNNLK(*)SLEAQAEK(*)       | K7  | 65    | 130.09 | 0.91489361 | 0.97402597 | 0.97647058  | 0.95513006  |
| Tpm1   | P58771 | 37  | SK(*)QLEDELVS LQK(*)        | K2  | 61.77 | 235.98 | 1.10638297 | 0.89610389 | 0.95294117  | 0.985142684 |
| Tpm1   | P58771 | 12  | MQMLK(*)LDK(*)ENALDR(*)     | K5  | 30.75 | 49.37  | 1.5        | 1.89610389 | -           | 1.698051948 |
| Tpm2   | P58774 | 128 | GMK(*)VIENR(*)              | K3  | 63.39 | 1000   | -          | 0.96052631 | 1.44827586  | 1.204401089 |
| Tpm2   | P58774 | 70  | DAQEK(*)LEQAEK(*)           | K5  | 50.69 | 151.86 | -          | 0.96052631 | 1.03448275  | 0.997504538 |
| Tpm2   | P58774 | 12  | MQMLK(*)LDK(*)ENALDR(*)     | K5  | 30.67 | 1000   | 1.48421052 | 1.92105263 | -           | 1.702631579 |
| Tpm2   | P58774 | 205 | IVTNNLK(*)SLEAQADK(*)       | K7  | 13.68 | 135.81 | -          | 2.51315789 | -           |             |
| Arpc4  | P59999 | 89  | ILC(+57.02)HK(*)FMR(*)      | K5  | 61.34 | 1000   | -          | 0.93827160 | 0.81720430  | 0.877737953 |
| Eif3e  | P60229 | 359 | MLADK(*)LNMTPEEAER(*)       | K5  | 47.3  | 1000   | -          | 1.325      | -           |             |
| Cdc42  | P60766 | 163 | YVEC(+57.02)SALTQK(*)GLK(*) | K10 | 77.98 | 62.26  | -          | 1          | 1.15384615  | 1.076923077 |
| Rps20  | P60867 | 34  | SLEK(*)VC(+57.02)ADLIR(*)   | K4  | 88.27 | 1000   | 1.02       | 0.92405063 | 0.93        | 0.958016878 |
| Ube2n  | P61089 | 82  | IYHPNVDK(*)LGR(*)           | K8  | 54.49 | 1000   | -          | 0.89333333 | 1.55172413  | 1.222528736 |
| Ube2n  | P61089 | 94  | DK(*)WSPALQIR(*)            | K2  | 48.36 | 1000   | 1.6        | 1.12       | 0.81609195  | 1.178697318 |
| Actr2  | P61161 | 388 | VLEK(*)LGVTVR(*)            | K4  | 56.97 | 1000   | 1.58947368 | -          | 0.94505494  | 1.267264315 |
| Actr2  | P61161 | 322 | ELK(*)QLYLER(*)             | K3  | 47.09 | 1000   | 1.30526315 | 0.8        | 1.09890109  | 1.068054752 |
| Actr2  | P61161 | 46  | STTK(*)VGNIIEK(*)           | K4  | 23.92 | 129.86 | -          | 1.2375     | -           |             |
| Rpl26  | P61255 | 2   | MK(*)FNPFVTSR(*)            | K2  | 48.21 | 1000   | -          | -          | 1.15555555  |             |
| Rpl26  | P61255 | 110 | LK(*)LDK(*)DR(*)            | K2  | 37.94 | 77.24  | 0.88349514 | 1.01234567 | 0.93333333  | 0.943058053 |
| Rpl27  | P61358 | 133 | WFFQK(*)LR(*)               | K5  | 82.36 | 1000   | 1.03092783 | 0.81818181 | 1.07777777  | 0.975629144 |
| Rpl27  | P61358 | 3   | GK(*)FMK(*)PGK(*)           | K2  | 63.07 | 78.06  | 0.72164948 | -          | 1           | 0.860824743 |
| Rpl27  | P61358 | 128 | NK(*)WFFQK(*)               | K2  | 60.35 | 105.53 | 1.45360824 | 1.02272727 | -           | 1.23816776  |
| Rpl37a | P61514 | 13  | VGIVGK(*)YGTR(*)            | K6  | 65.3  | 1000   | -          | -          | 0.989795918 |             |
| Nutf2  | P61971 | 55  | AAIVEK(*)LSSLPFQK(*)        | K6  | 58.32 | 135.81 | 1.42696629 | 0.88607594 | -           | 1.156521121 |
| Rps7   | P62082 | 147 | VK(*)LDGSR(*)               | K2  | 77.51 | 1000   | 1.19387755 | -          | 1.27659574  | 1.235236648 |

|        |        |     |                           |     |       |        |            |            |             |
|--------|--------|-----|---------------------------|-----|-------|--------|------------|------------|-------------|
| Rps7   | P62082 | 74  | SFQK(*)IQVR(*)            | K4  | 15.72 | 1000   | 1.66326530 | -          | -           |
| Rps8   | P62242 | 128 | GAK(*)LTPEEEIILNK(*)      | K3  | 73.21 | 142.64 | -          | 0.6625     | -           |
| Rps8   | P62242 | 37  | PAANTK(*)IGPR(*)          | K6  | 55.98 | 1000   | 0.91752577 | 0.8625     | 0.91208791  |
| Rps8   | P62242 | 157 | NAK(*)ISSLLEEQQQKG(*)     | K3  | 40.85 | 226.56 | 1.50515463 | 0.8125     | 1.75824175  |
| Rps15a | P62245 | 71  | LNK(*)C(+57.02)GVISPR(*)  | K3  | 45.14 | 1000   | 1.04166666 | 1.23170731 | 1.43956044  |
| Rps15a | P62245 | 88  | DLEK(*)WQNNLLPSR(*)       | K4  | 44.11 | 1000   | 1.16666666 | -          | -           |
| Rps15a | P62245 | 43  | MK(*)HGYIGFEIIDDHR(*)     | K2  | 43    | 1000   | 1.60416666 | -          | -           |
| Ywhae  | P62259 | 12  | AK(*)LAEQAER(*)           | K2  | 92.06 | 1000   | 1.09183673 | 0.90123456 | 1.01086956  |
| Ywhae  | P62259 | 123 | VFYYK(*)MK(*)             | K5  | 87.78 | 33.18  | 1.02040816 | 0.87654321 | 1.02173913  |
| Ywhae  | P62259 | 78  | EENK(*)GGEDK(*)LK(*)      | K9  | 87.12 | 36.05  | 0.92857142 | 0.75308642 | 0.97826087  |
| Ywhae  | P62259 | 50  | NLLSVAYK(*)NVIGAR(*)      | K8  | 32.92 | 1000   | 1.58163265 | 1.25925925 | -           |
| Rps14  | P62264 | 96  | ELGITALHIK(*)LR(*)        | K10 | 89.6  | 1000   | 1.00980392 | 1.05952381 | 0.92391304  |
| Rps14  | P62264 | 106 | TK(*)TPGPGAQSALR(*)       | K2  | 79.91 | 1000   | -          | 0.72619047 | 0.90217391  |
| Rps23  | P62267 | 54  | GIVLEK(*)VGVEAK(*)        | K6  | 25.57 | 113.99 | 1.25490196 | 1.80555555 | -           |
| Rps23  | P62267 | 37  | AHLGTALK(*)ANPFGGASHAK(*) | K8  | 21.36 | 70.27  | 1.14705882 | -          | -           |
| Rps18  | P62270 | 106 | YSQVLANGLDNK(*)LR(*)      | K12 | 74.83 | 1000   | 1.04040404 | 1.06024096 | 0.92391304  |
| Rps18  | P62270 | 34  | IAFAITAIK(*)GVGR(*)       | K9  | 56.9  | 1000   | 1.07070707 | 0.90361445 | 1.09782608  |
| Rps18  | P62270 | 94  | DGK(*)YSQVLANGLDNK(*)     | K3  | 50.4  | 243.69 | 1.24242424 | -          | -           |
| Rps18  | P62270 | 78  | QYK(*)IPDWFLNR(*)         | K3  | 31.33 | 1000   | 0.71717171 | -          | 1.59782608  |
| Rps18  | P62270 | 34  | AITAIK(*)GVGR(*)          | K6  | 14.71 | 1000   | -          | 0.83132530 | -           |
| Rps11  | P62281 | 38  | YYK(*)NIGLGFK(*)          | K3  | 66.67 | 62.93  | 1.06730769 | -          | -           |
| Rps13  | P62301 | 112 | DK(*)DAK(*)FR(*)          | K5  | 83.53 | 91.37  | 1.22340425 | 0.975      | 1           |
| Rps13  | P62301 | 9   | MHAPGK(*)GLSQSALPYR(*)    | K6  | 58.71 | 1000   | 1.06382978 | 1.175      | -           |
| Rps13  | P62301 | 70  | FVTGNK(*)ILR(*)           | K6  | 55.34 | 1000   | 1.32978723 | -          | 0.76344086  |
| Rps13  | P62301 | 27  | SVPTWLK(*)LTSDDVK(*)      | K7  | 53.86 | 78.16  | 1          | 0.775      | 0.87096774  |
| Rps13  | P62301 | 78  | SK(*)GLAPDLPEDLYHLIK(*)   | K2  | 33.79 | 170.25 | -          | -          | 1.559139785 |
| Lsm6   | P62313 | 23  | PVVVK(*)LNSGVDYR(*)       | K5  | 41.98 | 1000   | 0.35874439 | -          | -           |
| Psmc6  | P62334 | 68  | QLTEEK(*)FIVK(*)          | K6  | 39.91 | 41.04  | -          | 1.10256410 | 1.53333333  |
| Psmc6  | P62334 | 206 | VVSSSIVDK(*)YIGESAR(*)    | K9  | 33.06 | 1000   | -          | -          | 1.544444444 |
| Rps4x  | P62702 | 53  | LK(*)YALTGDEVK(*)         | K2  | 82.01 | 181.94 | 0.96938775 | 0.93827160 | 1.11827957  |
| Rps4x  | P62702 | 134 | IFVGTK(*)GIPHLVTHDAR(*)   | K6  | 81.88 | 1000   | 0.91836734 | 0.95061728 | 1.03225806  |
| Rps4x  | P62702 | 16  | VAAPK(*)HWMMLDK(*)        | K5  | 17.69 | 66.56  | -          | -          | 1.817204301 |
| Rpl23a | P62751 | 70  | NK(*)LDHYAIK(*)           | K2  | 69.74 | 170.86 | 1.3        | 1.15189873 | 1.90588235  |
| Rps6   | P62754 | 2   | MK(*)LNISFPATGC(+57.02)QK | K2  | 60.93 | 163.81 | 0.68       | 0.66666666 | 1.11578947  |

|          |        |     |                            |     |       |        |            |            |             |             |
|----------|--------|-----|----------------------------|-----|-------|--------|------------|------------|-------------|-------------|
| H4f16    | P62806 | 9   | G(+42.01)K(*)GGK(*)GLGK(*) | K5  | 77.07 | 69.71  | 0.94       | 0.91764705 | 1.06382978  | 0.973825615 |
| H4f16    | P62806 | 92  | TVTAMDVVYALK(*)R(*)        | K12 | 74.46 | 1000   | 1.03       | 0.92941176 | 1.11702127  | 1.025477681 |
| H4f16    | P62806 | 9   | GGK(*)GLGK(*)              | K3  | 51.69 | 82.24  | 1.41       | -          | 1.17021276  | 1.290106383 |
| Rab1A    | P62821 | 119 | YASENVNK(*)LLVGNK(*)       | K8  | 80.06 | 84.46  | 1.21875    | 1          | 0.88172043  | 1.033490143 |
| Rab1A    | P62821 | 61  | TIK(*)LQIWDTAGQER(*)       | K3  | 63.72 | 1000   | 0.82291666 | 0.96153846 | -           | 0.892227565 |
| Rab1A    | P62821 | 61  | IK(*)LQIWDTAGQER(*)        | K2  | 45.36 | 1000   | -          | -          | 1.086021505 |             |
| Ran      | P62827 | 60  | GPIK(*)FNVWDTAGQEK(*)      | K4  | 75.63 | 195.68 | 0.78494623 | 0.85185185 | 1.16483516  | 0.933877751 |
| Ran      | P62827 | 71  | FNVWDTAGQEK(*)FGGLR(*)     | K11 | 55.36 | 1000   | -          | 0.91358024 | 0.90109890  | 0.907339574 |
| Rpl23    | P62830 | 13  | GGSSGAK(*)FR(*)            | K7  | 67.77 | 1000   | 1.1875     | 1.18421052 | 1.05376344  | 1.141824656 |
| Rps25    | P62852 | 43  | DK(*)LNNLVLFDK(*)          | K2  | 91.7  | 246.46 | 0.93548387 | 0.83333333 | 0.95505618  | 0.907957795 |
| Rps25    | P62852 | 94  | AALQELLSK(*)GLIK(*)        | K9  | 88.5  | 82.24  | 0.95698924 | 1.08974359 | 1.03370786  | 1.026813567 |
| Rps25    | P62852 | 57  | ATYDK(*)LC(+57.02)K(*)     | K5  | 86.04 | 68.47  | -          | 0.92307692 | 0.87640449  | 0.899740709 |
| Rps25    | P62852 | 66  | YK(*)LITPAVVSER(*)         | K2  | 18.01 | 1000   | -          | 2.01282051 | -           |             |
| Rps28    | P62858 | 10  | VQPIK(*)LAR(*)             | K5  | 82.81 | 1000   | 1.09       | 0.94047619 | 0.82828282  | 0.952919673 |
| Rpl30    | P62889 | 44  | AK(*)LVILANNC(+57.02)PALR  | K2  | 86.2  | 1000   | 0.92380952 | 0.84444444 | 1.02061855  | 0.929624175 |
| Rpl30    | P62889 | 26  | SGK(*)YVLGYK(*)            | K3  | 68.95 | 109.28 | -          | -          | 0.969072165 |             |
| Rpl31    | P62900 | 75  | AVWAK(*)GIR(*)             | K5  | 15.5  | 1000   | -          | -          | 2.418367347 |             |
| Rps3     | P62908 | 141 | GC(+57.02)EVVVSGK(*)LR(*)  | K9  | 84.82 | 1000   | 1.08421052 | 0.98765432 | 0.94565217  | 1.005839007 |
| Rps3     | P62908 | 108 | YK(*)LLGGLAVR(*)           | K2  | 81.48 | 1000   | 0.95789473 | 0.85185185 | 0.80434782  | 0.871364805 |
| Rpl8     | P62918 | 149 | VK(*)LPSGSK(*)             | K2  | 12.3  | 55.13  | -          | 0.80487804 | -           |             |
| Uba52    | P62984 | 48  | LIFAGK(*)QLEDGR(*)         | K6  | 79.95 | 1000   | 1.80769230 | 0.96296296 | 0.89215686  | 1.220937378 |
| Uba52    | P62984 | 6   | MQIFVK(*)TLTGK(*)          | K6  | 21.62 | 38.32  | 3.38461538 | 1.48148148 | 1.59803921  | 2.154712027 |
| Uba52    | P62984 | 88  | QLAQK(*)YNC(+57.02)DK(*)   | K5  | 20.55 | 43.82  | -          | 1.59259259 | -           |             |
| Rac1     | P63001 | 166 | GLK(*)TVFDEAIR(*)          | K3  | 50.6  | 1000   | -          | 3.84810126 | -           |             |
| Rac1     | P63001 | 153 | EIGAVK(*)YLEC(+57.02)SALTQ | K6  | 42.43 | 1000   | -          | 1.08860759 | 1.38372093  | 1.236164263 |
| Rac1     | P63001 | 128 | DDK(*)DTIEK(*)LK(*)        | K8  | 22.46 | 21.68  | -          | -          | 1.395348837 |             |
| Pafah1b1 | P63005 | 351 | GVLFHSGGK(*)FILSC(+57.02)  | K9  | 17.25 | 127.49 | -          | 1.81081081 | -           |             |
| Hspa8    | P63017 | 500 | ENK(*)ITITNDK(*)           | K3  | 72.21 | 72.07  | -          | 0.92207792 | 0.93406593  | 0.928071928 |
| Hspa8    | P63017 | 348 | IQK(*)LLQDFFNGK(*)         | K3  | 62.41 | 184.54 | 0.98969072 | 1.01298701 | 1.28571428  | 1.096130674 |
| Hspa8    | P63017 | 128 | MK(*)EIAEAYLGK(*)          | K2  | 61.07 | 181.94 | 1.04123711 | 1.02597402 | 1.08791208  | 1.051707742 |
| Hspa8    | P63017 | 357 | LLQDFFNGK(*)ELNK(*)        | K9  | 51.14 | 35.13  | 0.86597938 | -          | 1.19780219  | 1.03189079  |
| Hspa8    | P63017 | 550 | NMK(*)ATVEDEK(*)           | K3  | 20.6  | 84.68  | -          | -          | 1.076923077 |             |
| Tpt1     | P63028 | 102 | GK(*)LEEQK(*)PER(*)        | K2  | 79.09 | 56.99  | 0.78217821 | 0.6625     | -           | 0.722339109 |
| Hspd1    | P63038 | 473 | ALK(*)IPAMTIK(*)           | K3  | 94.13 | 97.31  | 0.90721649 | 0.88888888 | 1.02197802  | 0.939361135 |

|        |        |      |                             |     |       |        |            |            |             |             |
|--------|--------|------|-----------------------------|-----|-------|--------|------------|------------|-------------|-------------|
| Hspd1  | P63038 | 396  | LAK(*)LSDGVAVLK(*)          | K3  | 84.53 | 186.74 | 0.91752577 | 0.90123456 | 0.91208791  | 0.910282751 |
| Hspd1  | P63038 | 31   | DVK(*)FGADAR(*)             | K3  | 72.92 | 1000   | 0.91752577 | 1.02469135 | 1.01098901  | 0.984402047 |
| Hmgb1  | P63158 | 59   | GK(*)FEDMAK(*)              | K2  | 84.06 | 104.48 | 1.08602150 | 0.98684210 | 0.97701149  | 1.016625035 |
| Hmgb1  | P63158 | 157  | YEK(*)DIAAYR(*)             | K3  | 79.88 | 1000   | -          | -          | 0.862068966 |             |
| Eif5a  | P63242 | 39   | GR(*)PC(+57.02)K(*)IVEMSTSI | K5  | 61.4  | 55.71  | -          | -          | 1.37755102  |             |
| Actg1  | P63260 | 284  | SIMK(*)C(+57.02)DVDIR(*)    | K4  | 86.81 | 1000   | 0.94174757 | 0.88461538 | 0.97777777  | 0.934713579 |
| Actg1  | P63260 | 328  | IK(*)IIAPPER(*)             | K2  | 86.11 | 1000   | 0.96116504 | 0.98717948 | 0.93333333  | 0.96055929  |
| Actg1  | P63260 | 50   | HQGVVMVGMGQK(*)DSYVGDE      | K11 | 47.75 | 254.02 | -          | 0.64102564 | 1.47777777  | 1.05940171  |
| Actg1  | P63260 | 315  | MQK(*)EITALAPSTMK(*)        | K3  | 34.85 | 141.98 | -          | 1.44871794 | -           |             |
| Actg1  | P63260 | 284  | NSIMK(*)C(+57.02)DVDIR(*)   | K5  | 27.39 | 1000   | 1.41747572 | 0.94871794 | 0.74444444  | 1.036879374 |
| Rps17  | P63276 | 72   | GISIK(*)LQEEER(*)           | K5  | 83.97 | 1000   | 1.26315789 | 1.21333333 | 0.98888888  | 1.155126706 |
| Rps17  | P63276 | 49   | NK(*)IAGYVTHLMK(*)          | K2  | 80.91 | 189.31 | 1.02105263 | 1.02666666 | 0.94444444  | 0.997387914 |
| Rps17  | P63276 | 19   | VIIEK(*)YYTR(*)             | K5  | 59.42 | 1000   | 0.38947368 | 0.74666666 | 2.42222222  | 1.186120858 |
| Ube2i  | P63280 | 59   | GTPWEGGLFK(*)LR(*)          | K10 | 66.72 | 1000   | 1          | 0.95774647 | 0.94252873  | 0.966758405 |
| Rpl22  | P67984 | 84   | YLK(*)YLTK(*)               | K3  | 47.68 | 77.13  | -          | -          | 0.71875     |             |
| Rack1  | P68040 | 183  | VWNLANC(+57.02)K(*)LK(*)    | K8  | 91.18 | 22.85  | 0.95652173 | 0.8875     | 0.96703296  | 0.937018235 |
| Rack1  | P68040 | 175  | LVK(*)VWNLANC(+57.02)K(*)   | K3  | 88.35 | 183.32 | 1.04347826 | 0.8875     | 1.03296703  | 0.987981765 |
| Rack1  | P68040 | 44   | TIIMWK(*)LTR(*)             | K6  | 75.87 | 1000   | 1.07608695 | 0.8375     | 1.17582417  | 1.029803711 |
| Rack1  | P68040 | 130  | TIK(*)LWNTLGVC(+57.02)K(*)  | K3  | 66.46 | 181.94 | 1.26086956 | 0.875      | 1.12087912  | 1.085582895 |
| Ywhaq  | P68254 | 120  | VFYLK(*)MK(*)               | K5  | 95.93 | 36.05  | 0.97058823 | 0.975      | 1.06521739  | 1.003601875 |
| Ywhaq  | P68254 | 3    | M(+42.01)EK(*)TELIQK(*)     | K3  | 73.23 | 134.33 | 1.04901960 | -          | -           |             |
| Ywhaq  | P68254 | 85   | EK(*)VESELR(*)              | K2  | 17.66 | 1000   | -          | 1.2375     | -           |             |
| Tubb4b | P68372 | 58   | INVYYNEATGGK(*)YVPR(*)      | K12 | 41.81 | 1000   | 0.34042553 | -          | 1.10112359  | 0.720774564 |
| H3c11  | P68433 | 57   | YQK(*)STELLIR(*)            | K3  | 98.49 | 1000   | 0.94565217 | 0.94871794 | 0.90909090  | 0.934487011 |
| H3c11  | P68433 | 24   | K(+42.01)(*)QLATK(*)AAR(*)  | K6  | 97.38 | 1000   | 278.260869 | -          | -           |             |
| H3c11  | P68433 | 57   | R(*)YQK(*)STELLIR(*)        | K4  | 77.52 | 1000   | 1.43478260 | 1.07692307 | 1.03409090  | 1.181932198 |
| H3c11  | P68433 | 123  | VTIMPK(*)DIQLAR(*)          | K6  | 75.42 | 1000   | 1.43478260 | 0.91025641 | -           | 1.17251951  |
| H3c11  | P68433 | 80   | EIAQDFK(*)TDLR(*)           | K7  | 60.24 | 1000   | 1.07608695 | 0.93589743 | 1.27272727  | 1.094903889 |
| H3c11  | P68433 | 123  | R(*)VTIMPK(*)DIQLAR(*)      | K7  | 46.2  | 1000   | -          | 1.33333333 | -           |             |
| Kpnb1  | P70168 | 835  | DVLK(*)LVEAR(*)             | K4  | 61.62 | 1000   | 1.30107526 | 1.03797468 | -           | 1.169524977 |
| Kpnb1  | P70168 | 23   | LELEAAQK(*)FLER(*)          | K8  | 43.68 | 1000   | 1.18279569 | 0.87341772 | -           | 1.028106711 |
| Rad50  | P70388 | 874  | SEK(*)LQIATNLQR(*)          | K3  | 31.75 | 1000   | -          | 1.32467532 | -           |             |
| Naca   | P70670 | 2054 | AMSK(*)LGLR(*)              | K4  | 13.68 | 1000   | 1.52747252 | -          | -           |             |
| Ctps1  | P70698 | 309  | YTK(*)FSDSYASVIK(*)         | K3  | 32.58 | 133.99 | -          | 2.01315789 | -           |             |



|       |        |     |                              |     |       |        |            |            |             |             |
|-------|--------|-----|------------------------------|-----|-------|--------|------------|------------|-------------|-------------|
| Cct7  | P80313 | 47  | GMDK(*)LIVDGR(*)             | K4  | 57.32 | 1000   | 1.04210526 | 0.91139240 | 0.96666666  | 0.973388112 |
| Cct7  | P80313 | 67  | ATISNDGATILK(*)LLDVVHPAAI    | K12 | 28.04 | 47.07  | -          | 2          | -           |             |
| Cct2  | P80314 | 46  | STLGPK(*)GMDK(*)             | K6  | 54.18 | 61.37  | -          | -          | 0.597826087 |             |
| Cct2  | P80314 | 181 | DHFTK(*)LAVEAVLR(*)          | K5  | 40.23 | 1000   | -          | 1.1625     | 1.13043478  | 1.146467392 |
| Cct2  | P80314 | 284 | ILK(*)HGINC(+57.02)FINR(*)   | K3  | 26.32 | 1000   | -          | 2.075      | -           |             |
| Cct2  | P80314 | 82  | NIGVDNPAAK(*)VLVDMSR(*)      | K10 | 14.91 | 1000   | -          | 1.0125     | -           |             |
| Cct4  | P80315 | 489 | HAQGEK(*)TTGINVR(*)          | K6  | 63.08 | 1000   | 1.17708333 | 0.7625     | 0.77419354  | 0.904592294 |
| Cct4  | P80315 | 395 | GSNK(*)LVIEEAER(*)           | K4  | 57.27 | 1000   | -          | 0.75       | -           |             |
| Cct4  | P80315 | 143 | ALEK(*)GLEILTDMSR(*)         | K4  | 44.85 | 1000   | 0.76041666 | 1          | 1.88172043  | 1.214045699 |
| Cct4  | P80315 | 375 | LFK(*)ITGC(+57.02)TSPGK(*)   | K3  | 27.56 | 123.34 | -          | 1.7375     | -           |             |
| Cct5  | P80316 | 265 | HK(*)LDVMSVEDYK(*)           | K2  | 68.6  | 168.06 | 0.97959183 | 0.91358024 | -           | 0.946586042 |
| Cct5  | P80316 | 176 | TTLGSK(*)VINSCL(+57.02)HR(*) | K6  | 61.13 | 1000   | 1.20408163 | 1.13580246 | 1.22826087  | 1.189381657 |
| Cct5  | P80316 | 223 | LEDTK(*)LIK(*)               | K5  | 56.47 | 62.26  | 1.06122449 | -          | 1.05434782  | 1.057786158 |
| Cct5  | P80316 | 284 | EK(*)FEEMIK(*)               | K2  | 13.41 | 95.35  | 1.15306122 | 1.53086419 | -           | 1.341962711 |
| Cct6a | P80317 | 55  | MLVSGAGDIK(*)LTK(*)          | K10 | 80.31 | 32.97  | 0.87755102 | 0.85365853 | 0.93617021  | 0.88912659  |
| Cct6a | P80317 | 45  | GTMK(*)MLVSGAGDIK(*)         | K4  | 63.02 | 158.16 | 1.14285714 | 0.82926829 | 0.91489361  | 0.962339684 |
| Cct3  | P80318 | 370 | DPK(*)AC(+57.02)TILLR(*)     | K3  | 72.04 | 1000   | 0.86458333 | 0.49367088 | 1.05319148  | 0.803815236 |
| Ap2m1 | P84091 | 256 | LSK(*)FDSEK(*)               | K3  | 14.8  | 1000   | -          | 1.60810810 | 1.37931034  | 1.493709227 |
| Rpl19 | P84099 | 144 | ILMEHIHK(*)LK(*)             | K8  | 60.8  | 22.85  | 1.125      | 0.98809523 | 1.1         | 1.071031746 |
| Rpl19 | P84099 | 92  | MPEK(*)VTWMR(*)              | K4  | 42.82 | 1000   | 1.04166666 | -          | -           |             |
| Mcm6  | P97311 | 205 | FVDFQK(*)VR(*)               | K6  | 42.26 | 1000   | -          | 0.88888888 | 1.30769230  | 1.098290599 |
| Rps3a | P97351 | 187 | EVVVK(*)LIPDSIGK(*)          | K5  | 90.33 | 92.28  | 0.95098039 | 0.93975903 | 0.9375      | 0.942746476 |
| Rps3a | P97351 | 85  | FK(*)LITEDVQGK(*)            | K2  | 84.16 | 146.24 | 0.95098039 | 0.83132530 | 0.88541666  | 0.889240787 |
| Rps3a | P97351 | 56  | TQGTK(*)IASDGLK(*)           | K5  | 74.92 | 57.92  | -          | 1.06024096 | 0.89583333  | 0.978037149 |
| Rps3a | P97351 | 109 | DK(*)MC(+57.02)SMVK(*)       | K2  | 24.06 | 95.35  | -          | 1          | -           |             |
| Rps3a | P97351 | 227 | FELGK(*)LMELHGEKGSSGK(*)     | K5  | 23.71 | 49.25  | -          | 2.06024096 | -           |             |
| Anxa4 | P97429 | 259 | SMK(*)GLGTDDNTLIR(*)         | K3  | 29.21 | 1000   | -          | 2.15189873 | -           |             |
| Fhl1  | P97447 | 4   | S(+42.01)EK(*)FDC(+57.02)HY  | K3  | 59.53 | 1000   | 0.91836734 | 0.97435897 | -           | 0.946363161 |
| Rps5  | P97461 | 47  | YAK(*)YLPHSAGR(*)            | K3  | 33.8  | 1000   | -          | 0.85185185 | 1.92134831  | 1.386600084 |
| Tubb5 | P99024 | 58  | ISVYYNEATGGK(*)YVPR(*)       | K12 | 88.12 | 1000   | 1.01020408 | 1.12658227 | 0.90322580  | 1.013337389 |
| Top2a | Q01320 | 613 | YYK(*)GLGTSTSK(*)            | K3  | 19.41 | 63.7   | -          | -          | 1.26744186  |             |
| Rsu1  | Q01730 | 158 | LTK(*)LQILSLR(*)             | K3  | 58    | 1000   | 1.19565217 | 0.86046511 | 1.22826087  | 1.09479272  |
| Nme2  | Q01768 | 39  | LVAMK(*)FLR(*)               | K5  | 97.35 | 1000   | 1.03157894 | 0.97530864 | 1.1         | 1.035629196 |
| Nme2  | Q01768 | 49  | ASEEHLK(*)QHYYDLK(*)         | K7  | 60.95 | 79.54  | 0.78947368 | 0.83950617 | -           | 0.814489929 |

|           |        |      |                           |     |       |        |             |             |             |             |
|-----------|--------|------|---------------------------|-----|-------|--------|-------------|-------------|-------------|-------------|
| Vcp       | Q01853 | 505  | FLK(*)FGMTPSK(*)          | K3  | 81.89 | 127.53 | 0.916666666 | 0.666666666 | 0.923076923 | 0.835470086 |
| Uba1      | Q02053 | 185  | GIK(*)LVVADTR(*)          | K3  | 60.48 | 1000   | 1.79787234  | -           | -           |             |
| Uba1      | Q02053 | 838  | ATLPSPDK(*)LPGFK(*)       | K8  | 15.63 | 38.32  | 1.34042553  | -           | -           |             |
| Nucb1     | Q02819 | 70   | EK(*)LQAANAEDIK(*)        | K2  | 42.98 | 165.51 | 0.87368421  | 1.63636363  | 1.226190476 | 1.245412774 |
| Atp5f1a   | Q03265 | 434  | QVAGTMK(*)LELAQYR(*)      | K7  | 64.19 | 1000   | 1.01020408  | 0.95180722  | 0.67391304  | 0.878641451 |
| Atp5f1a   | Q03265 | 539  | ISEQSDAK(*)LK(*)          | K8  | 61.16 | 26.31  | 1.47959183  | 0.95180722  | -           | 1.215699533 |
| Atp5f1a   | Q03265 | 531  | SDGK(*)ISEQSDAK(*)        | K4  | 39.3  | 117.11 | -           | 1.19277108  | 0.79347826  | 0.993124673 |
| Top1      | Q04750 | 722  | QIALGTSK(*)LNYLDPR(*)     | K8  | 39.59 | 1000   | 1.71568627  | 0.48837209  | -           | 1.102029184 |
| Fabp5     | Q05816 | 10   | DLEGK(*)WR(*)             | K5  | 14.64 | 1000   | -           | 1.58536585  | -           |             |
| Cab39     | Q06138 | 196  | HK(*)LLSAEFLEQHYDR(*)     | K2  | 60.27 | 1000   | -           | -           | 1.068181818 |             |
| Cnn2      | Q08093 | 134  | TK(*)GLQSGVDIGVK(*)       | K2  | 73.48 | 256.29 | 0.94505494  | 0.88157894  | 0.94505494  | 0.923896279 |
| Cnn2      | Q08093 | 25   | LLSK(*)YDPQK(*)           | K4  | 69.05 | 98.37  | -           | 0.89473684  | 0.97802197  | 0.93637941  |
| Cnn2      | Q08093 | 234  | HIYDTK(*)LGTDK(*)         | K6  | 67.82 | 70.86  | -           | 1.09210526  | 0.87912087  | 0.985613071 |
| Cnn2      | Q08093 | 55   | GLK(*)DGVILC(+57.02)TLMNK | K3  | 35.23 | 249.7  | 0.85714285  | 1.77631578  | -           | 1.316729323 |
| Npepps    | Q11011 | 280  | AEQ GK(*)FALEVA AK(*)     | K5  | 37.94 | 142.27 | 1.26881720  | 0.60526315  | 1.36046511  | 1.078181826 |
| Ddb1      | Q3U1J4 | 570  | ILK(*)LPSFELLHK(*)        | K3  | 32.78 | 143.22 | 1.48453608  | 1.21518987  | -           | 1.349862978 |
| Pdap1     | Q3UHX2 | 126  | YMK(*)MHLAGK(*)           | K3  | 54.31 | 121.92 | -           | -           | 0.784090909 |             |
| Edc4      | Q3UJB9 | 1097 | SK(*)NLTD AIAR(*)         | K2  | 17.02 | 1000   | 1.54444444  | -           | -           |             |
| Abrac1    | Q4KML4 | 25   | NADGK(*)LSVK(*)           | K5  | 15.78 | 48.97  | -           | 1.26506024  | 1.05319148  | 1.159125865 |
| Arcn1     | Q5XJY5 | 309  | ISDDK(*)FGR(*)            | K5  | 15.3  | 1000   | -           | -           | 1.208791209 |             |
| Cttn      | Q60598 | 235  | GFGGK(*)FGVQTDR(*)        | K5  | 37.52 | 1000   | 1.18367346  | 1.62337662  | 1.03260869  | 1.279886263 |
| Cttn      | Q60598 | 124  | GFGGK(*)FGVQMDR(*)        | K5  | 25.3  | 1000   | -           | -           | 1.206521739 |             |
| Cttn      | Q60598 | 87   | ASHGYGGK(*)FGVEQDR(*)     | K8  | 20.54 | 1000   | -           | -           | 1.25        |             |
| Myl6      | Q60605 | 56   | VLGNPK(*)SDEMNVK(*)       | K6  | 81.14 | 102.29 | 0.99        | 0.8625      | 0.82954545  | 0.894015152 |
| Myl6      | Q60605 | 26   | TGDGK(*)ILYSQC(+57.02)GDV | K5  | 59.4  | 1000   | -           | 0.925       | -           |             |
| Ppp5c     | Q60676 | 111  | AASN MALGK(*)FR(*)        | K9  | 53.45 | 1000   | -           | -           | 0.90625     |             |
| P4ha1     | Q60715 | 320  | NPK(*)FILAPAK(*)          | K3  | 23.06 | 161.52 | 0.95789473  | 1.32894736  | 1.46067415  | 1.249172087 |
| Serp inb6 | Q60854 | 100  | LFGDK(*)TC(+57.02)DLLASF  | K5  | 37.54 | 195.94 | -           | 1.76623376  | -           |             |
| Stip1     | Q60864 | 284  | ELC(+57.02)EK(*)AIEVGR(*) | K5  | 33.54 | 1000   | -           | 1.4625      | -           |             |
| Stip1     | Q60864 | 229  | EK(*)ELGNDAYK(*)          | K2  | 32.12 | 99.23  | -           | 1.275       | 0.95652173  | 1.11576087  |
| Stip1     | Q60864 | 169  | ELIEQLQNK(*)PSDLGK(*)LQD  | K16 | 26.81 | 83.89  | -           | 3.15        | 2.03260869  | 2.591304348 |
| Stip1     | Q60864 | 136  | NLPNLYQK(*)LENDPR(*)      | K8  | 16.89 | 1000   | 1.74489795  | 2.2375      | 1.81521739  | 1.93253845  |
| Vdac3     | Q60931 | 163  | SK(*)LSQNNFALGYK(*)       | K2  | 43.41 | 213.66 | 1.3         | 0.96385542  | 1.44210526  | 1.235320228 |
| Vdac1     | Q60932 | 109  | GLK(*)LTFDSSFSPNTGK(*)    | K3  | 32.7  | 178.91 | 2.32291666  | 2.06024096  | -           | 2.191578816 |

|         |        |      |                            |     |       |        |            |            |             |             |
|---------|--------|------|----------------------------|-----|-------|--------|------------|------------|-------------|-------------|
| Hars    | Q61035 | 257  | NEMVGEK(*)GLAPEVADR(*)     | K7  | 25.09 | 1000   | -          | 1.74358974 | -           |             |
| Mapre1  | Q61166 | 204  | VLK(*)LTVEDLEK(*)          | K3  | 73.28 | 150.63 | -          | 1.02531645 | 1.23456790  | 1.129942179 |
| Mapre1  | Q61166 | 220  | DFYFGK(*)LR(*)             | K6  | 21.59 | 1000   | -          | -          | 1.444444444 |             |
| Prdx2   | Q61171 | 29   | EIK(*)LSDYR(*)             | K3  | 18.68 | 1000   | 1.10526315 | -          | -           |             |
| Hspa4   | Q61316 | 610  | MIMQDK(*)LEK(*)            | K6  | 61.68 | 53.53  | 1.77894736 | 0.875      | -           | 1.326973684 |
| Hspa4   | Q61316 | 675  | QVYVDK(*)LAELK(*)          | K6  | 50.72 | 76.42  | 1.32631578 | 0.775      | 1.08888888  | 1.063401559 |
| Hspa4   | Q61316 | 680  | LAELK(*)SLGQPIK(*)         | K5  | 49.36 | 142.27 | -          | 1.1625     | -           |             |
| Hspa4   | Q61316 | 632  | DK(*)LSGEYEK(*)            | K2  | 42.18 | 148.49 | -          | 1.0625     | 0.9         | 0.98125     |
| Hspa4   | Q61316 | 305  | GK(*)FLEMC(+57.02)DDLLAR(  | K2  | 32.57 | 1000   | 1.07368421 | 1.2375     | 1.72222222  | 1.344468811 |
| Hspa4   | Q61316 | 329  | SVLEQSK(*)LK(*)            | K7  | 30.66 | 20.41  | 1.47368421 | -          | 1.77777777  | 1.625730995 |
| Bcap31  | Q61335 | 95   | VNLQNNPGAMEHFHMK(*)LFR     | K16 | 77.19 | 1000   | -          | 1.03947368 | 1.17021276  | 1.104843225 |
| Bcap31  | Q61335 | 167  | GAAEDGDK(*)LDIGNTEMK(*)    | K8  | 44.5  | 159.26 | 1.26804123 | -          | 1.28723404  | 1.27763764  |
| Glg1    | Q61543 | 626  | AMDVK(*)LDPALQDK(*)        | K5  | 29.07 | 109.84 | -          | 1.25333333 | -           |             |
| Gdi2    | Q61598 | 210  | IK(*)LYSESLAR(*)           | K2  | 71.26 | 1000   | 1.08163265 | 1.525      | -           | 1.303316327 |
| Hsph1   | Q61699 | 665  | FIC(+57.02)EQEHEK(*)FLR(*) | K9  | 36.93 | 1000   | -          | 1.28947368 | 3.01136363  | 2.15041866  |
| Phgdh   | Q61753 | 69   | VTADVINA AEK(*)LQVVGR(*)   | K11 | 57.02 | 1000   | 1.02173913 | 1.30379746 | 0.78651685  | 1.037351151 |
| Phgdh   | Q61753 | 394  | QADVNLVNAK(*)LLVK(*)       | K10 | 56.34 | 88.98  | 0.83695652 | 0.86075949 | 0.73033707  | 0.809351032 |
| Myh10   | Q61879 | 1800 | AK(*)LQELEGAVK(*)          | K2  | 83.3  | 161.68 | 1.14       | 0.9625     | 1.04255319  | 1.048351064 |
| Myh10   | Q61879 | 1331 | QK(*)LNLSSR(*)             | K2  | 68.41 | 1000   | -          | 0.825      | 1.05319148  | 0.939095745 |
| Myh10   | Q61879 | 663  | ESLTK(*)LMATLR(*)          | K5  | 50.48 | 1000   | 0.54       | -          | 1.11702127  | 0.828510639 |
| Mcm7    | Q61881 | 159  | ADSVGK(*)LLTVR(*)          | K6  | 49.01 | 1000   | 0.98958333 | 0.90123456 | 0.94565217  | 0.945490025 |
| Npm1    | Q61937 | 265  | VEAK(*)FINYVK(*)           | K4  | 96.52 | 143.14 | 1.01020408 | 1          | 0.94623655  | 0.985480214 |
| Npm1    | Q61937 | 248  | AK(*)MQASIEK(*)            | K2  | 87.15 | 128.65 | -          | 0.9375     | 0.96774193  | 0.952620968 |
| Srsf2   | Q62093 | 36   | VFEK(*)YGR(*)              | K4  | 13.91 | 1000   | -          | -          | 1.408163265 |             |
| Sptbn1  | Q62261 | 1354 | EK(*)LTGLHK(*)             | K2  | 66.27 | 101.67 | 1.12765957 | 1.35897435 | 1.18478260  | 1.223805514 |
| Sptbn1  | Q62261 | 1913 | LVDTGDK(*)FR(*)            | K7  | 49.68 | 1000   | -          | 1.33333333 | 1.21739130  | 1.275362319 |
| Tsn     | Q62348 | 187  | LLNLK(*)NDSLRL(*)          | K5  | 37.71 | 1000   | 2.35483871 | 1.14864864 | -           | 1.75174368  |
| Snrnp70 | Q62376 | 118  | VNYDTTESK(*)LR(*)          | K9  | 48.29 | 1000   | 1.30303030 | 0.95061728 | 0.83695652  | 1.03020137  |
| Sh3gl1  | Q62419 | 67   | AK(*)LTMLNTVSK(*)          | K2  | 37.99 | 143.22 | -          | 1.1125     | 1.22352941  | 1.168014706 |
| Cstb    | Q62426 | 34   | ENQK(*)FDVFK(*)            | K4  | 80.82 | 115.97 | 1.12631578 | 1.11688311 | 0.93023255  | 1.057810488 |
| Eif4g2  | Q62448 | 170  | LLISK(*)LQDEFENR(*)        | K5  | 27.89 | 1000   | -          | -          | 1.258426966 |             |
| Eif4g2  | Q62448 | 760  | DNISPK(*)LHVDK(*)          | K6  | 20.28 | 46.62  | -          | 1.5        | -           |             |
| Zyx     | Q62523 | 263  | FAPVAPK(*)FTPVVSK(*)       | K7  | 23.02 | 71.72  | -          | 1.49253731 | 1.65        | 1.571268657 |
| Raly    | Q64012 | 165  | TTIPVK(*)LFAR(*)           | K6  | 36.15 | 1000   | -          | 1.33783783 | 1.76744186  | 1.552639849 |

|            |        |      |                              |    |       |        |            |            |             |             |
|------------|--------|------|------------------------------|----|-------|--------|------------|------------|-------------|-------------|
| Btf3       | Q64152 | 55   | LAK(*)LQAQVR(*)              | K3 | 83.01 | 1000   | 1.16853932 | 1.18181818 | 1.13793103  | 1.162762847 |
| Btf3       | Q64152 | 52   | ETIMNQEK(*)LAK(*)            | K8 | 43.24 | 32.69  | 1.33707865 | 1.74025974 | 1.19540229  | 1.424246897 |
| Hist2h2bb  | Q64525 | 117  | HAVSEGTK(*)AVTK(*)           | K8 | 79.76 | 72.09  | -          | -          | -           | -           |
| Hist2h2bb  | Q64525 | 109  | LLLPGELAK(*)HAVSEGTK(*)      | K9 | 74.5  | 36.48  | -          | -          | -           | -           |
| Hist2h2bb  | Q64525 | 47   | VLK(*)QVHPDTGISSK(*)         | K3 | 68.11 | 139.71 | -          | -          | -           | -           |
| Vcl        | Q64727 | 778  | EVENSEDPK(*)FR(*)            | K9 | 76.24 | 1000   | -          | 0.91025641 | 0.93478260  | 0.92251951  |
| Vcl        | Q64727 | 276  | ALASIDSK(*)LNQAK(*)          | K8 | 70.59 | 100.21 | 0.96907216 | 0.88461538 | 1.03260869  | 0.962098749 |
| Cltc       | Q68FD5 | 1612 | VDK(*)LDASESLR(*)            | K3 | 74.07 | 1000   | 0.98969072 | 0.9        | 0.55434782  | 0.814679516 |
| Cltc       | Q68FD5 | 163  | QK(*)WLLLTGISAQQNR(*)        | K2 | 28.87 | 1000   | -          | 1.4375     | -           | -           |
| Myof       | Q69ZN7 | 871  | HK(*)FSDVTGK(*)              | K2 | 18.08 | 104.64 | 1.30526315 | -          | 1.73033707  | 1.517800119 |
| Hist2h2aa2 | Q6GSS7 | 96   | NDEELNK(*)LLGK(*)            | K7 | 88.57 | 87.62  | -          | -          | -           | -           |
| Tpm4       | Q6IRU2 | 169  | NVTNNLK(*)SLEAASEK(*)        | K7 | 85.85 | 151.55 | 1.01030927 | 0.90123456 | 1.04395604  | 0.98516663  |
| Tpm4       | Q6IRU2 | 195  | LLSDK(*)LK(*)                | K5 | 85    | 33.18  | 0.94845360 | 1          | 1.09890109  | 1.015784902 |
| Tpm4       | Q6IRU2 | 116  | EAK(*)HITDEADR(*)            | K3 | 46.95 | 1000   | -          | 0.56790123 | -           | -           |
| Tpm4       | Q6IRU2 | 223  | TIDDLEEK(*)LAQAK(*)          | K8 | 21.06 | 80.41  | -          | -          | 1.505494505 | -           |
| Dnajc8     | Q6NZB0 | 108  | AYK(*)LLLDQEQQ(*)            | K3 | 40.97 | 150.89 | 1.19801980 | -          | -           | -           |
| Srsf1      | Q6PDM2 | 38   | DIEDVIFYK(*)YGAIR(*)         | K8 | 30.7  | 1000   | 1.59375    | 2.32098765 | -           | 1.957368827 |
| Srsf1      | Q6PDM2 | 179  | K(*)LDNTK(*)FR(*)            | K6 | 14.52 | 86.16  | 1.01041666 | -          | -           | -           |
| Rps9       | Q6ZWN5 | 93   | M(+15.99)K(*)LDYILGLK(*)     | K2 | 90.75 | 154.74 | 1.03191489 | 0.89156626 | 1.03191489  | 0.985132018 |
| Rps9       | Q6ZWN5 | 116  | LQTQVFK(*)LGLAK(*)           | K7 | 86.71 | 87.95  | 0.94680851 | 0.91566265 | 0.97872340  | 0.947064855 |
| Rps9       | Q6ZWN5 | 47   | VK(*)FTLAK(*)                | K2 | 80.1  | 98.37  | -          | 0.96385542 | 0.95744680  | 0.960651116 |
| Rps9       | Q6ZWN5 | 155  | LDSQK(*)HIDFSLR(*)           | K5 | 73.56 | 1000   | 1.06382978 | 0.86746988 | 1.04255319  | 0.991284286 |
| Rps9       | Q6ZWN5 | 30   | LDQELK(*)LIGEYGLR(*)         | K6 | 60.55 | 1000   | 1.05319148 | -          | 1.05319148  | 1.053191489 |
| Rps9       | Q6ZWN5 | 91   | IGVLDEGK(*)MK(*)             | K8 | 58.16 | 30.83  | 1.28723404 | 0.96385542 | 1.09574468  | 1.115611382 |
| Rpl10      | Q6ZWV3 | 101  | INK(*)MLSC(+57.02)AGADR(*)   | K3 | 72.68 | 1000   | 1.21875    | 0.83544303 | -           | 1.027096519 |
| Rpl10      | Q6ZWV3 | 74   | IC(+57.02)ANK(*)YMVK(*)      | K5 | 68.54 | 82.24  | 1.22916666 | 0.89873417 | 1.20652173  | 1.111474194 |
| Rpl10      | Q6ZWV3 | 198  | LIPDGC(+57.02)GVK(*)YIPNR(*) | K9 | 54.46 | 1000   | 0.70833333 | 0.65822784 | -           | 0.683280591 |
| Rpl10      | Q6ZWV3 | 175  | TK(*)FNADEFEDMVAEK(*)        | K2 | 38.37 | 205.45 | 0.98958333 | -          | -           | -           |
| Rpl35      | Q6ZWV7 | 43   | VTGGAASK(*)LSK(*)            | K8 | 97.46 | 53.53  | 0.86868686 | 0.72164948 | 0.98837209  | 0.859569482 |
| Rpl35      | Q6ZWV7 | 25   | QLDDLK(*)VELSQLR(*)          | K6 | 29.29 | 1000   | -          | 0.67010309 | 1.48837209  | 1.079237593 |
| Ppp2r1a    | Q76MZ3 | 188  | AAASK(*)LGEFAK(*)            | K5 | 89.23 | 132.53 | 1.03333333 | 0.93150684 | 0.96428571  | 0.976375299 |
| Ppp2r1a    | Q76MZ3 | 266  | YMVADK(*)FTELQK(*)           | K6 | 64.75 | 113.99 | 1.07777777 | 0.95890411 | 1.04761904  | 1.028100312 |
| Syncrip    | Q7TMK9 | 363  | SFSQFGK(*)LER(*)             | K7 | 51.57 | 1000   | 1.39583333 | 0.76623376 | 1.10989011  | 1.090652403 |
| Dek        | Q7TNV0 | 91   | GQK(*)LC(+57.02)EIER(*)      | K3 | 63.83 | 1000   | -          | 0.96153846 | 1.06896551  | 1.01525199  |

|          |        |      |                           |     |       |        |            |            |             |             |
|----------|--------|------|---------------------------|-----|-------|--------|------------|------------|-------------|-------------|
| Actn1    | Q7TPR4 | 312  | VPENTMHAMQQK(*)LEDGR(*)   | K12 | 60.87 | 1000   | 1.10416666 | 0.83333333 | 0.82417582  | 0.920558608 |
| Actn1    | Q7TPR4 | 195  | HR(*)PELIDYGG(*)LR(*)     | K10 | 53.06 | 1000   | 1.63541666 | 0.92307692 | 1.15384615  | 1.237446581 |
| Actn1    | Q7TPR4 | 312  | AMQQK(*)LEDGR(*)          | K5  | 42.72 | 1000   | 1.17708333 | -          | -           | -           |
| Mybbp1a  | Q7TPV4 | 1097 | TVNHEK(*)LSVDLTAPLGVLSK   | K6  | 61.68 | 298.8  | 0.98958333 | -          | -           | -           |
| Mybbp1a  | Q7TPV4 | 54   | ATEK(*)LLEYLR(*)          | K4  | 57.61 | 1000   | 1.10416666 | -          | -           | -           |
| Septin9  | Q80UG5 | 488  | LVNEK(*)FR(*)             | K5  | 71.3  | 1000   | 1.15789473 | 0.95       | 1.24175824  | 1.116550993 |
| Flnb     | Q80X90 | 495  | GPK(*)GLEELVK(*)          | K3  | 69.91 | 148.49 | -          | 0.83116883 | -           | -           |
| Flnb     | Q80X90 | 1005 | EC(+57.02)STAK(*)FIPR(*)  | K6  | 53.83 | 1000   | -          | 1.11688311 | -           | -           |
| Flnb     | Q80X90 | 1801 | YAPTEVGLHEMHK(*)YR(*)     | K14 | 48.51 | 1000   | 1.16842105 | 0.70129870 | 0.9         | 0.923239918 |
| Tufm     | Q8BFR5 | 88   | ILAEGGGAK(*)FK(*)         | K9  | 33.06 | 22.85  | 1.40425531 | 1.08108108 | -           | 1.2426682   |
| Tnpo1    | Q8BFY9 | 192  | FLQFFK(*)HSSPK(*)         | K6  | 32.23 | 115.97 | -          | 2          | -           | -           |
| Hnrnpa3  | Q8BG05 | 57   | EHFEK(*)WGTLTDC(+57.02)W  | K5  | 23.38 | 1000   | -          | -          | 1.27272727  | 3           |
| Aars     | Q8BGQ7 | 338  | YSHEK(*)LNASR(*)          | K5  | 28.81 | 1000   | -          | 1.35443038 | 1.31868131  | 1.33655585  |
| Aars     | Q8BGQ7 | 476  | AK(*)GLEATDDSPK(*)        | K2  | 28.35 | 168.62 | -          | -          | 1.252747253 | -           |
| Nup93    | Q8BJ71 | 619  | VASVAENK(*)GLFEEAAK(*)    | K8  | 42.63 | 78.17  | 1.36559139 | 1.225      | 1.43010752  | 1.340232975 |
| Nup93    | Q8BJ71 | 718  | LK(*)LVPLNQESVEER(*)      | K2  | 32.37 | 1000   | -          | 1          | -           | -           |
| Ipo5     | Q8BKC5 | 800  | AK(*)LEEHEFK(*)           | K2  | 74.22 | 129.15 | 0.95789473 | 1.15189873 | 1.22340425  | 1.111065909 |
| Ipo5     | Q8BKC5 | 712  | LK(*)FYFHDGVR(*)          | K2  | 39.95 | 1000   | 2.87368421 | -          | -           | -           |
| Slc25a24 | Q8BMD8 | 283  | LLTEEGQK(*)LGTFR(*)       | K8  | 37.58 | 1000   | 0.54639175 | 0.61842105 | 1.54216867  | 0.90232716  |
| Eif1ax   | Q8BMJ3 | 88   | DYQDNK(*)ADVILK(*)        | K6  | 30.6  | 69.64  | -          | -          | 1.73333333  | -           |
| Ckap4    | Q8BMK4 | 167  | QDLTEK(*)AVK(*)           | K6  | 78.4  | 53.53  | -          | 1.16455696 | 0.95604395  | 1.060300459 |
| Ckap4    | Q8BMK4 | 361  | R(*)LEEELQQLK(*)VGAHGSEEG | K10 | 48.92 | 82.05  | 1.08080808 | 1.16455696 | -           | 1.122682522 |
| Ckap4    | Q8BMK4 | 335  | LALQALTEK(*)LLR(*)        | K9  | 45.68 | 1000   | 1.37373737 | -          | -           | -           |
| Ckap4    | Q8BMK4 | 524  | SSVSQVESDLK(*)MLR(*)      | K11 | 45.1  | 1000   | 0.95959596 | 0.98734177 | -           | 0.973468866 |
| Ckap4    | Q8BMK4 | 251  | MK(*)VASLEESK(*)          | K2  | 21.73 | 78.75  | -          | -          | 1.406593407 | -           |
| NARS1    | Q8BP47 | 42   | TGLK(*)ALMTVGK(*)         | K4  | 14.5  | 78.16  | -          | 1.71604938 | -           | -           |
| Rpl24    | Q8BP67 | 27   | TDGK(*)VFQFLNAK(*)        | K4  | 47.81 | 154.74 | 1.02912621 | -          | 0.89473684  | 0.961931528 |
| Flna     | Q8BTM8 | 120  | ESIK(*)LVSIDSK(*)         | K4  | 78.8  | 110.43 | 0.90425531 | 0.93506493 | 0.94318181  | 0.927500691 |
| Flna     | Q8BTM8 | 906  | GK(*)LDVQFSGLAK(*)        | K2  | 68.93 | 148.29 | 1.10638297 | 0.92207792 | 1.22727272  | 1.085244543 |
| Flna     | Q8BTM8 | 2563 | VVAK(*)GLGLSK(*)          | K4  | 68.54 | 151.86 | 1.11702127 | -          | 0.88636363  | 1.001692457 |
| Flna     | Q8BTM8 | 127  | LVSIDSK(*)AIVDGNLK(*)     | K7  | 49.3  | 97.31  | 0.87234042 | 0.70129870 | 0.82954545  | 0.801061527 |
| Iars     | Q8BU30 | 254  | GK(*)LFILTEAR(*)          | K2  | 54.94 | 1000   | -          | 1          | 1.04255319  | 1.021276596 |
| Iars     | Q8BU30 | 169  | QLYDK(*)GLVYR(*)          | K5  | 17.76 | 1000   | 2.25531914 | -          | -           | -           |
| Etf1     | Q8BWY3 | 171  | EVLHK(*)FTVDLPK(*)        | K5  | 22.66 | 68.46  | 1.72043010 | -          | -           | -           |

|           |        |      |                             |     |       |        |            |            |             |             |
|-----------|--------|------|-----------------------------|-----|-------|--------|------------|------------|-------------|-------------|
| Pgam5     | Q8BX10 | 140  | LASLGLK(*)FNK(*)            | K7  | 22.96 | 44.44  | 2.83132530 | 1.58108108 | -           | 2.206203191 |
| Gemin5    | Q8BX17 | 738  | LSQFK(*)PK(*)               | K5  | 1.87  | 22.85  | -          | 0          | 0           | 0           |
| Septin11  | Q8C1B7 | 366  | ELHEK(*)FDLLK(*)            | K5  | 81.95 | 115.97 | 1.03030303 | 0.85185185 | 0.98863636  | 0.956930415 |
| Smc4      | Q8CG47 | 387  | EK(*)FTQLDLEDVQVR(*)        | K2  | 19.61 | 1000   | 1.69696969 | -          | -           |             |
| Smc2      | Q8CG48 | 1160 | TK(*)FVDGVSTVAR(*)          | K2  | 44.77 | 1000   | -          | -          | 1.042105263 |             |
| Smc2      | Q8CG48 | 677  | SQAASILTK(*)FQEVK(*)        | K9  | 30.58 | 61.26  | 1.75510204 | 1.43421052 | -           | 1.594656284 |
| Eprs      | Q8CGC7 | 1389 | DTGEK(*)LTIAEK(*)           | K5  | 53.85 | 108.85 | 0.89690721 | 1.16666666 | 0.93617021  | 0.999914699 |
| Eprs      | Q8CGC7 | 282  | YAEK(*)LIQEGK(*)            | K4  | 30.52 | 113.99 | -          | 2.96153846 | -           |             |
| H2bc12    | Q8CGP1 | 6    | PEPAK(*)SAPAPK(*)           | K5  | 99.73 | 85.52  | 387.878787 | -          | 400         | 393.939394  |
| H2bc12    | Q8CGP1 | 121  | AVTK(*)YTSAK(*)             | K4  | 48.53 | 51     | 1.28787878 | 1.26666666 | 0.953125    | 1.169223485 |
| Hist1h2ah | Q8CGP6 | 96   | NDEELNK(*)LLGR(*)           | K7  | 99.3  | 1000   | 0.93814433 | 0.88095238 | 1.01162790  | 0.943574873 |
| Eif3b     | Q8JZQ9 | 243  | NADGYK(*)LDK(*)             | K6  | 24.38 | 32.97  | -          | -          | 1.433333333 |             |
| Eif3b     | Q8JZQ9 | 353  | GIALWGGDK(*)FK(*)           | K9  | 13.4  | 21.68  | -          | 1.89024390 | -           |             |
| Bclaf1    | Q8K019 | 591  | SIFDHIK(*)LPQANK(*)         | K7  | 11.27 | 36.87  | -          | 1.24       | -           |             |
| Dnm1l     | Q8K1M6 | 244  | VIPVK(*)LGIIGVVNR(*)        | K5  | 53.93 | 1000   | 1.02083333 | 1.20253164 | 0.96629213  | 1.063219038 |
| Sdha      | Q8K2B3 | 179  | AFGGQSLK(*)FGK(*)           | K8  | 32.63 | 49.37  | 1.54       | 1.21428571 | -           | 1.377142857 |
| Matr3     | Q8K310 | 473  | VHLSQK(*)YK(*)              | K6  | 26.63 | 45.01  | -          | -          | 2.044444444 |             |
| Eif3l     | Q8QZY1 | 465  | SFLK(*)LYTTMPVAK(*)         | K4  | 22.89 | 140.79 | -          | 1.69047619 | -           |             |
| Gspt1     | Q8R050 | 350  | TAGVK(*)HLIVLINK(*)         | K5  | 20.9  | 171.6  | 2.18681318 | -          | -           |             |
| Eif3c     | Q8R1B4 | 551  | LC(+57.02)K(*)YIYAK(*)      | K3  | 16.84 | 98.37  | -          | 0.6375     | -           |             |
| Slc38a4   | Q8R1S9 | 140  | EGGSLIYEK(*)LGEK(*)         | K9  | 37.12 | 48.12  | -          | 1.32926829 | -           |             |
| Nup58     | Q8R332 | 300  | LK(*)LETAQELK(*)            | K2  | 79.95 | 139.75 | -          | 0.84931506 | 0.70526315  | 0.777289113 |
| Nup85     | Q8R480 | 540  | LTFLGK(*)YR(*)              | K6  | 23.09 | 1000   | -          | 1.31578947 | -           |             |
| Arl6ip5   | Q8R5J9 | 151  | LENK(*)MEGIGLK(*)           | K4  | 22.13 | 102.29 | -          | 1.57692307 | -           |             |
| Myh9      | Q8VDD5 | 1793 | AK(*)LQEMESAVK(*)           | K2  | 97.68 | 195.41 | 0.97959183 | 0.91139240 | 0.97802197  | 0.956335407 |
| Myh9      | Q8VDD5 | 1324 | QK(*)LSLSTK(*)              | K2  | 93.3  | 109.62 | 0.94897959 | 0.97468354 | 1.04395604  | 0.989206393 |
| Myh9      | Q8VDD5 | 656  | EQLAK(*)LMATLR(*)           | K5  | 80.48 | 1000   | 0.87755102 | 0.88607594 | 1.12087912  | 0.96150203  |
| Myh9      | Q8VDD5 | 299  | TDLLLEPYNK(*)YR(*)          | K10 | 80.09 | 1000   | 1.16326530 | 1.02531645 | 0.94505494  | 1.044545569 |
| Myh9      | Q8VDD5 | 1024 | NK(*)HEAMITDLEER(*)         | K2  | 78.93 | 1000   | 0.94897959 | 0.98734177 | 1.02197802  | 0.986099795 |
| Myh9      | Q8VDD5 | 8    | A(+42.01)QQAADK(*)YLYVDK(*) | K7  | 78.44 | 109.28 | 1.33673469 | 1.27848101 | 1.03296703  | 1.216060913 |
| Myh9      | Q8VDD5 | 989  | K(*)LEEDQIIMEDQNC(+57.02)   | K15 | 77.16 | 38.16  | 1.10204081 | 1.22784810 | 0.97802197  | 1.102636965 |
| Myh9      | Q8VDD5 | 860  | EK(*)HLAAENR(*)             | K2  | 74.49 | 1000   | 0.96938775 | 1.02531645 | 1.01098901  | 1.001897741 |
| Myh9      | Q8VDD5 | 1410 | VAAYDK(*)LEK(*)             | K6  | 73.56 | 37.54  | -          | 0.70886075 | 0.90109890  | 0.80497983  |
| Myh9      | Q8VDD5 | 1477 | ETK(*)ALSLAR(*)             | K3  | 68.99 | 1000   | -          | 0.94936708 | 1.30769230  | 1.128529699 |



|         |        |      |                            |    |       |        |            |            |             |             |
|---------|--------|------|----------------------------|----|-------|--------|------------|------------|-------------|-------------|
| Myh9    | Q8VDD5 | 1459 | TISAK(*)YAEER(*)           | K5 | 56.3  | 1000   | -          | 1.20253164 | 1.31868131  | 1.260606483 |
| Myh9    | Q8VDD5 | 580  | VDYK(*)ADEWLMK(*)          | K4 | 54.85 | 114.14 | 0.89795918 | 0.84810126 | 1.04395604  | 0.930005498 |
| Myh9    | Q8VDD5 | 682  | AGK(*)LDPHLVLDQLR(*)       | K3 | 46.89 | 1000   | 1.77551020 | -          | -           | -           |
| Myh9    | Q8VDD5 | 1620 | K(*)LEMDLK(*)DLEAHIDTANK(  | K7 | 40.23 | 22.09  | 0.79591836 | -          | -           | -           |
| Myh9    | Q8VDD5 | 1193 | QK(*)HSQAVEELADQLEQTK(*)   | K2 | 39.29 | 211.93 | -          | 0.51898734 | 2.56043956  | 1.539713451 |
| Myh9    | Q8VDD5 | 1332 | LK(*)QMEDEK(*)             | K2 | 24.81 | 121.92 | -          | 1.06329113 | -           | -           |
| Myh9    | Q8VDD5 | 833  | LFTK(*)VK(*)PLLNSIR(*)     | K4 | 10.78 | 60.92  | -          | 1.26582278 | -           | -           |
| Atp1a1  | Q8VDN2 | 45   | EVSMDDHK(*)LSLDELHR(*)     | K8 | 51.14 | 1000   | 1.15625    | -          | -           | -           |
| Ddx39a  | Q8VDW0 | 190  | NVK(*)HFVLDEC(+57.02)DK(*) | K3 | 53.01 | 181.07 | -          | 1.67105263 | -           | -           |
| Ddx39a  | Q8VDW0 | 137  | FSK(*)YMPSVK(*)            | K3 | 23.65 | 49.54  | -          | -          | 1.144444444 | -           |
| Hnrnpu  | Q8VEK3 | 527  | QMADTGK(*)LNTLLQR(*)       | K7 | 78.22 | 1000   | 1.14285714 | 1.10389610 | 1.14444444  | 1.13039923  |
| Hnrnpu  | Q8VEK3 | 328  | HLTK(*)DIDIHEVR(*)         | K5 | 74.77 | 1000   | 1.16483516 | 1.05194805 | 0.92222222  | 1.046335146 |
| Hnrnpu  | Q8VEK3 | 541  | APQC(+57.02)LGK(*)FIEIAAR( | K7 | 71.23 | 1000   | 1.17582417 | 1.23376623 | 1.35555555  | 1.255048655 |
| Hnrnpu  | Q8VEK3 | 31   | GLK(*)ADLMDR(*)            | K3 | 67.27 | 1000   | 0.94505494 | 0.77922077 | 1.05555555  | 0.926610427 |
| Hnrnpu  | Q8VEK3 | 640  | EEAQK(*)LLEQYK(*)          | K5 | 39.76 | 143.14 | 0.67032967 | -          | -           | -           |
| Hnrnpu  | Q8VEK3 | 611  | DLPEHAVLK(*)MK(*)          | K9 | 28.72 | 30.36  | -          | 2.07792207 | 1.73333333  | 1.905627706 |
| Hnrnpu  | Q8VEK3 | 500  | HAAENPGK(*)YNILGTNTIMDK    | K8 | 26.25 | 106.18 | -          | 1.29870129 | -           | -           |
| Hnrnpu  | Q8VEK3 | 12   | LK(*)VSELK(*)EELK(*)       | K2 | 18.97 | 76.17  | -          | 1.07792207 | -           | -           |
| Slc25a3 | Q8VEM8 | 308  | GVWK(*)GLFAR(*)            | K4 | 72.7  | 1000   | 0.98979591 | 1          | 0.92473118  | 0.971509034 |
| Slc25a3 | Q8VEM8 | 242  | TVEALYK(*)FVVPK(*)         | K7 | 43.19 | 49.68  | 1.15306122 | -          | -           | -           |
| Slc25a3 | Q8VEM8 | 229  | TMMK(*)FAC(+57.02)FER(*)   | K4 | 16    | 1000   | 1.40816326 | -          | -           | -           |
| Flnc    | Q8VHX6 | 114  | EHK(*)LVSIDSK(*)           | K4 | 68.7  | 163.4  | 0.88888888 | 0.85135135 | 1.04651162  | 0.928917289 |
| Flnc    | Q8VHX6 | 1832 | YAPTEK(*)GLHQMGIK(*)       | K6 | 39.04 | 115.01 | 0.88888888 | 1.20270270 | 1.02325581  | 1.038282469 |
| Flnc    | Q8VHX6 | 902  | AK(*)LDVHFAGAAK(*)         | K2 | 30.93 | 172.15 | -          | 1.08108108 | -           | -           |
| Sfpq    | Q8VIJ6 | 405  | STGK(*)GIVEFASK(*)         | K4 | 22.19 | 132.12 | -          | -          | 1.976744186 | -           |
| Acly    | Q91V92 | 265  | SGASLK(*)LTLLNPK(*)        | K6 | 64.03 | 161.52 | 1.19148936 | 0.83333333 | 0.83146067  | 0.952094456 |
| Cavin3  | Q91VJ2 | 121  | GK(*)LHVLLFK(*)            | K2 | 27.77 | 161.52 | -          | 1.09756097 | -           | -           |
| Rbmxl1  | Q91VM5 | 30   | ALEAVFGK(*)YGR(*)          | K8 | 59.08 | 1000   | 1.16666666 | 0.97402597 | 0.65476190  | 0.931818182 |
| Ddx1    | Q91VR5 | 358  | LDDLVTGK(*)LNLSQVR(*)      | K9 | 28.58 | 1000   | 1.79166666 | -          | -           | -           |
| Ddx1    | Q91VR5 | 317  | YIDNPK(*)LR(*)             | K6 | 11.59 | 1000   | -          | -          | 1.285714286 | -           |
| Rpn1    | Q91YQ5 | 588  | DTYLENEK(*)LSSGK(*)        | K8 | 41.56 | 79.02  | 1.74489795 | 0.93975903 | -           | 1.342328498 |
| Rpn1    | Q91YQ5 | 565  | ELVLK(*)SAVEAER(*)         | K5 | 21.72 | 1000   | -          | 0.98795180 | -           | -           |
| Lrp1    | Q91ZX7 | 2391 | AEK(*)LYFSDATLDK(*)        | K3 | 18.77 | 131.64 | 1.42574257 | -          | -           | -           |
| Supt16h | Q920B9 | 216  | HSK(*)LAESVEK(*)           | K3 | 13.95 | 102.29 | -          | 1.41772151 | -           | -           |

|         |        |      |                           |     |       |        |            |            |                                |
|---------|--------|------|---------------------------|-----|-------|--------|------------|------------|--------------------------------|
| Fdps    | Q920E5 | 31   | VLTEK(*)ELGHPEIGDAIAR(*)  | K5  | 58.85 | 1000   | -          | 0.88607594 | -                              |
| Fdps    | Q920E5 | 57   | EVLEYNALGGK(*)YNR(*)      | K11 | 35.54 | 1000   | -          | 1.55696202 | 0.9777777777777777 1.267369902 |
| Rheb    | Q921J2 | 102  | VIHGK(*)LLDMVGK(*)        | K5  | 32.78 | 161.52 | -          | 1.54794520 | -                              |
| Sf3b3   | Q921M3 | 965  | VLIGVGK(*)LLR(*)          | K7  | 29.83 | 1000   | -          | 1.04819277 | -                              |
| Clip1   | Q922J3 | 812  | EK(*)FASTSEEAVSAQTR(*)    | K2  | 37.23 | 1000   | -          | 0.91666666 | 1.73626373 1.326465202         |
| Far1    | Q922J9 | 29   | VLLEK(*)LLR(*)            | K5  | 52.12 | 1000   | -          | -          | 1.24691358                     |
| Far1    | Q922J9 | 63   | VEEILSSK(*)LFDR(*)        | K8  | 43.65 | 1000   | 1.06451612 | 1.25333333 | 1.45679012 1.258213195         |
| Lrrc59  | Q922Q8 | 73   | NK(*)LQQLPADFGR(*)        | K2  | 93.29 | 1000   | 0.98039215 | 0.96296296 | 1.03409090 0.99248201          |
| Lrrc59  | Q922Q8 | 111  | NLK(*)WLDLK(*)            | K3  | 53.77 | 115.97 | -          | 1          | 1.52272727 1.261363637         |
| Taldo1  | Q93092 | 269  | DNSK(*)LAPALSVK(*)        | K4  | 36.1  | 118.18 | -          | -          | 0.988095238                    |
| Rap1b   | Q99JI6 | 5    | EYK(*)LVVLGSGGVGK(*)      | K3  | 48.12 | 159.14 | -          | 1.36111111 | -                              |
| Eif3m   | Q99JX4 | 155  | WISDWK(*)LTTEK(*)         | K6  | 32.92 | 76.42  | -          | 1.41025641 | -                              |
| Actr3   | Q99JY9 | 348  | LK(*)LSEELSGGR(*)         | K2  | 58.61 | 1000   | -          | 0.87341772 | 1.02222222 0.947819972         |
| Nono    | Q99K48 | 297  | EK(*)LEMEMEAAR(*)         | K2  | 49.5  | 1000   | 1.01098901 | -          | 3.56179775 2.286393382         |
| Nono    | Q99K48 | 98   | K(*)LFEK(*)YGK(*)         | K5  | 47.55 | 37.54  | -          | -          | 1.393258427                    |
| Nono    | Q99K48 | 192  | GR(*)PSGK(*)GIVEFSGK(*)   | K6  | 15.26 | 73.08  | -          | 1.17333333 | -                              |
| Psat1   | Q99K85 | 190  | PVDVSK(*)FGVIFAGAQK(*)    | K6  | 63.52 | 133.99 | 1.01063829 | 0.80519480 | 1.41573033 1.077187813         |
| Psat1   | Q99K85 | 269  | NNGGAAAMEK(*)LSSIK(*)     | K10 | 48.67 | 30.64  | -          | 0.98701298 | 0.91011236 0.948562674         |
| Tmed9   | Q99KF1 | 160  | DK(*)LSELQLR(*)           | K2  | 47.07 | 1000   | 1.8        | -          | -                              |
| Aco2    | Q99KI0 | 50   | YDLLEK(*)NINIVR(*)        | K6  | 29.04 | 1000   | 2.05050505 | 1.70129870 | - 1.875901876                  |
| Dctn2   | Q99KJ8 | 65   | VGTK(*)GLDFSDR(*)         | K4  | 11.99 | 1000   | -          | -          | 1.244444444                    |
| Prpf19  | Q99KP6 | 428  | NFK(*)TLQLDNNFEVK(*)      | K3  | 39.12 | 183.46 | 1.29787234 | -          | -                              |
| St13    | Q99L47 | 141  | AIDLFTDAIK(*)LNPR(*)      | K10 | 61.65 | 1000   | 0.80851063 | 0.74074074 | 1.10989011 0.886380496         |
| St13    | Q99L47 | 362  | VMNLISK(*)LSAK(*)         | K7  | 16.36 | 42.89  | -          | 1.75308642 | -                              |
| Gps1    | Q99LD4 | 317  | FYESK(*)YASC(+57.02)LK(*) | K5  | 19.59 | 63.05  | -          | 2.62162162 | -                              |
| Kars1   | Q99MN1 | 139  | ASGGK(*)LIFYDLR(*)        | K5  | 58.45 | 1000   | 0.97916666 | 0.87951807 | - 0.92934237                   |
| Srrt    | Q99MR6 | 525  | LAAG(*)LIHTLDDR(*)        | K4  | 16.63 | 1000   | -          | 1.67567567 | -                              |
| Rrbp1   | Q99PL5 | 1564 | AAIK(*)LQELLK(*)          | K4  | 55.99 | 134.33 | 0.98039215 | -          | 0.86813186 0.924262013         |
| Rrbp1   | Q99PL5 | 1124 | VAELHSK(*)LQSSEVEVK(*)    | K7  | 30.17 | 74.73  | -          | 0.97368421 | -                              |
| Atp5mg  | Q9CPQ8 | 66   | TGSFK(*)HLTVK(*)          | K5  | 65.57 | 105.53 | -          | 0.97402597 | 1.04255319 1.008289583         |
| Mydgf   | Q9CPT4 | 154  | AELSK(*)LVIVAK(*)         | K5  | 27.01 | 121.92 | -          | 1.12       | -                              |
| Bzw1    | Q9CQC6 | 60   | FLDASGAK(*)LDYR(*)        | K8  | 75.4  | 1000   | 1.07446808 | 0.96153846 | 0.97701149 1.004339347         |
| Chmp1b2 | Q9CQD4 | 12   | HLFNLK(*)FAAK(*)          | K6  | 28.11 | 48.83  | -          | 1.38888888 | -                              |
| Ykt6    | Q9CQW1 | 166  | GEK(*)LDDLVSX(*)          | K3  | 12.65 | 75.79  | -          | 1.02597402 | -                              |

|         |        |     |                               |     |       |        |            |            |             |             |
|---------|--------|-----|-------------------------------|-----|-------|--------|------------|------------|-------------|-------------|
| Rpl14   | Q9CR57 | 85  | ADINTK(*)WAATR(*)             | K6  | 74.65 | 1000   | 1.32352941 | 0.9        | 1.04347826  | 1.089002558 |
| Rpl14   | Q9CR57 | 103 | AK(*)MTDFDR(*)                | K2  | 70.64 | 1000   | 1.07843137 | 1.0375     | 0.94565217  | 1.020527849 |
| Rpl14   | Q9CR57 | 23  | AGK(*)LVAVDVIDQNR(*)          | K3  | 40.04 | 1000   | 0.85294117 | -          | -           | -           |
| Xpot    | Q9CRT8 | 635 | VLLEK(*)LMMAQDEER(*)          | K5  | 13.97 | 1000   | 0.83505154 | -          | 0.81521739  | 0.825134469 |
| Pfdn1   | Q9CWM4 | 28  | VK(*)LADIQIEQLNR(*)           | K2  | 52.32 | 1000   | -          | 0.94520547 | -           | -           |
| Psm8    | Q9CX56 | 284 | AYEK(*)ILFAEATR(*)            | K4  | 10.23 | 1000   | -          | 0.43037974 | -           | -           |
| Hnrnpa0 | Q9CX86 | 159 | AAVVK(*)FHPIQGHR(*)           | K5  | 67.38 | 1000   | -          | 0.79487179 | 0.93333333  | 0.864102564 |
| Rpl11   | Q9CXW4 | 85  | AEEILEK(*)GLK(*)              | K7  | 86.42 | 57.45  | 0.95959596 | 0.875      | 1           | 0.94486532  |
| Rpl11   | Q9CXW4 | 67  | NEK(*)IAVHC(+57.02)TVR(*)     | K3  | 33.43 | 1000   | -          | 0.89772727 | 1.61111111  | 1.254419192 |
| Rpl11   | Q9CXW4 | 67  | R(*)NEK(*)IAVHC(+57.02)TVR(*) | K4  | 13.45 | 1000   | -          | -          | 1.13333333  | -           |
| Serbp1  | Q9CY58 | 122 | R(*)PDQQLQGDGK(*)LIDR(*)      | K11 | 76.18 | 1000   | 0.98936170 | 0.85897435 | -           | 0.924168031 |
| Serbp1  | Q9CY58 | 302 | AK(*)VEFNIR(*)                | K2  | 39.67 | 1000   | 0.54255319 | -          | -           | -           |
| Gars1   | Q9CZD3 | 187 | TSGHVDK(*)FADFMVK(*)          | K7  | 59.45 | 110.43 | 1.12765957 | 0.86842105 | -           | 0.998040314 |
| Rpl15   | Q9CZM2 | 93  | PVHHGVNQLK(*)FAR(*)           | K10 | 64.24 | 1000   | -          | -          | 0.829545455 | -           |
| Shmt2   | Q9CZN7 | 464 | TAK(*)LQDFK(*)                | K3  | 59.21 | 96.93  | 0.86458333 | 0.91566265 | -           | 0.890122992 |
| Cs      | Q9CZU6 | 327 | DVSDEK(*)LR(*)                | K6  | 58.16 | 1000   | -          | 1.74712643 | -           | -           |
| Cs      | Q9CZU6 | 459 | SMSTDGLMK(*)FVDSK(*)          | K9  | 51.85 | 87.95  | 0.99009901 | 0.86206896 | 1.26666666  | 1.039611548 |
| Cs      | Q9CZU6 | 327 | EVGK(*)DVSDEK(*)LR(*)         | K10 | 15.81 | 62.39  | -          | 1.74712643 | -           | -           |
| Cs      | Q9CZU6 | 366 | EFALK(*)HLPK(*)               | K5  | 14.24 | 69.71  | 1.95049505 | -          | -           | -           |
| Rps19   | Q9CZX8 | 38  | VPEWVDTVK(*)LAK(*)            | K9  | 62.95 | 40.63  | 0.84313725 | 0.89534883 | 0.92929292  | 0.889259674 |
| Rps19   | Q9CZX8 | 29  | LK(*)VPEWVDTVK(*)             | K2  | 58.41 | 105.42 | -          | 0.74418604 | 1.09090909  | 0.917547569 |
| Rps19   | Q9CZX8 | 111 | VLQALEGLK(*)MVEK(*)           | K9  | 39.84 | 52.86  | 1.24509803 | 0.83720930 | 1.35353535  | 1.145280898 |
| Rps19   | Q9CZX8 | 77  | GGAGVGSMTK(*)IYGGR(*)         | K10 | 33.05 | 1000   | -          | 1.61627907 | 1.27272727  | 1.444503172 |
| Pbdc1   | Q9D0B6 | 63  | LISSVDPQFLK(*)LTK(*)          | K11 | 35.05 | 28.96  | -          | 0.79012345 | -           | -           |
| Hnrnpm  | Q9D0E1 | 671 | DK(*)FNEC(+57.02)GHVLYADI     | K2  | 46.82 | 39.02  | -          | 0.7        | -           | -           |
| Rars    | Q9D0I9 | 484 | DK(*)VLTEEELK(*)              | K2  | 73.97 | 135.81 | -          | 0.63291139 | 0.64835164  | 0.64063152  |
| Tars1   | Q9D0R2 | 242 | ILNEK(*)VNTPTTTVYR(*)         | K5  | 11.06 | 1000   | -          | 1.20779220 | -           | -           |
| Tmed10  | Q9D1D4 | 143 | VEK(*)LK(*)PLEVELR(*)         | K3  | 19.31 | 43.88  | -          | 1.23170731 | -           | -           |
| Sarnp   | Q9D1J3 | 10  | A(+42.01)AETVELHK(*)LK(*)     | K9  | 51.33 | 26.31  | 1.12037037 | 1.01265822 | -           | 1.066514299 |
| Eef1e1  | Q9D1M4 | 138 | EK(*)YLNVSr(*)                | K2  | 16.98 | 1000   | -          | 1.62650602 | -           | -           |
| Chordc1 | Q9D1P4 | 134 | LK(*)LSSGSEEDK(*)K(*)EEDSDI   | K2  | 16.16 | 60.15  | -          | -          | 1.33333333  | -           |
| Bcas2   | Q9D287 | 177 | NMQLTAGSK(*)LR(*)             | K9  | 29.2  | 1000   | 1.14285714 | 1.30379746 | 1.32989690  | 1.258850506 |
| Nop56   | Q9D6Z1 | 375 | YLANK(*)C(+57.02)SIASR(*)     | K5  | 26.46 | 1000   | -          | 2.09756097 | -           | -           |
| Ppa1    | Q9D819 | 57  | WSNAK(*)MEIATK(*)             | K5  | 14.57 | 50.87  | -          | 1.74074074 | -           | -           |

|         |        |      |                            |     |       |        |            |            |             |             |
|---------|--------|------|----------------------------|-----|-------|--------|------------|------------|-------------|-------------|
| Uqcrb   | Q9D855 | 12   | SAVSASSK(*)WLDGFR(*)       | K8  | 14.8  | 1000   | 1.21311475 | -          | -           |             |
| Rpl4    | Q9D8E6 | 239  | LNILK(*)LAPGGHVGR(*)       | K5  | 79.11 | 1000   | 0.76842105 | 0.85185185 | 1.125       | 0.915090968 |
| Rpl4    | Q9D8E6 | 327  | IMLK(*)LNPYAK(*)           | K4  | 61.53 | 113.99 | -          | 1.07407407 | -           |             |
| Rpl4    | Q9D8E6 | 333  | LNPYAK(*)TMR(*)            | K6  | 48.25 | 1000   | -          | 1.39506172 | 1.125       | 1.260030864 |
| Eef1g   | Q9D8N0 | 434  | AVNQGK(*)IFK(*)            | K6  | 97.78 | 50.22  | -          | -          | 36.83870968 |             |
| Eef1g   | Q9D8N0 | 212  | LC(+57.02)EK(*)MAQFDAK(*)  | K4  | 94.27 | 148.49 | 1.05208333 | 0.96341463 | 0.97849462  | 0.99799753  |
| Eef1g   | Q9D8N0 | 147  | ILGLLDTHLK(*)TR(*)         | K10 | 57.34 | 1000   | 1.04166666 | -          | 0.91397849  | 0.977822581 |
| Eef1g   | Q9D8N0 | 208  | AILGEVK(*)LC(+57.02)EK(*)  | K7  | 51.7  | 69.71  | 1.58333333 | 0.80487804 | 0.97849462  | 1.122235335 |
| Cnn3    | Q9DAW9 | 156  | R(*)FDEGK(*)LK(*)          | K6  | 14.84 | 30.83  | -          | -          | 0.775280899 |             |
| Atp5po  | Q9DB20 | 192  | IGEK(*)YVDMSAK(*)          | K4  | 51.26 | 104.64 | -          | -          | 0.935483871 |             |
| Ap2b1   | Q9DBG3 | 721  | AK(*)GLEISGTFTHR(*)        | K2  | 32.1  | 1000   | -          | 1.3875     | -           |             |
| Rpn2    | Q9DBG6 | 460  | NVYK(*)FELDTSER(*)         | K4  | 23.3  | 1000   | -          | 1.76315789 | -           |             |
| Gnai3   | Q9DC51 | 35   | EVK(*)LLLLGAGESGK(*)       | K3  | 35.74 | 176.98 | -          | 3.03846153 | 1.91764705  | 2.478054299 |
| Gnai3   | Q9DC51 | 92   | LK(*)IDFGESAR(*)           | K2  | 17.46 | 1000   | -          | 1.89743589 | -           |             |
| Tomm20  | Q9DCC8 | 56   | AGLSK(*)LPDLK(*)           | K5  | 15.04 | 81.69  | -          | -          | -           |             |
| Eif3f   | Q9DCH4 | 242  | TVK(*)YAYYDTER(*)          | K3  | 19.52 | 1000   | -          | 1.14285714 | -           |             |
| Paics   | Q9DCL9 | 53   | K(*)NHLEGK(*)AAISNK(*)     | K7  | 16.96 | 46.17  | -          | -          | 1.444444444 |             |
| Etfb    | Q9DCW4 | 176  | LK(*)LPAVVTADLR(*)         | K2  | 56.44 | 1000   | -          | 0.79487179 | -           |             |
| Pes1    | Q9EQ61 | 81   | FLLHEPIVVK(*)FR(*)         | K10 | 25.25 | 1000   | 1.42696629 | -          | -           |             |
| Vps35   | Q9EQH3 | 38   | NK(*)LMDALK(*)             | K2  | 67.06 | 123.86 | -          | 0.93506493 | 1.17582417  | 1.055444556 |
| Mvp     | Q9EQK5 | 745  | IEGEGSVLQAK(*)LK(*)        | K11 | 23.68 | 22.85  | 2.31632653 | -          | -           |             |
| Rtn3    | Q9ES97 | 954  | IQAK(*)LPGIAK(*)           | K4  | 44.04 | 62.39  | -          | -          | 2.206185567 |             |
| Anp32b  | Q9EST5 | 116  | R(*)LDC(+57.02)LK(*)SLDLFG | K6  | 24.14 | 1000   | 1.60439560 | -          | -           |             |
| Tmod3   | Q9JHJ0 | 230  | TLEANTHVK(*)HFSLAATR(*)    | K9  | 23.85 | 1000   | -          | 1.41095890 | -           |             |
| Dync1h1 | Q9JHU4 | 679  | GWENHVEGQK(*)LK(*)         | K10 | 19.52 | 32.28  | -          | 1.37974683 | 1.59340659  | 1.486576714 |
| Dync1h1 | Q9JHU4 | 1117 | VNLK(*)YDSWHK(*)           | K4  | 16.91 | 76.27  | -          | 2.29113924 | -           |             |
| Prmt1   | Q9JIF0 | 134  | ANK(*)LDHVVTIHK(*)         | K3  | 61.74 | 159.26 | 1.03092783 | 0.72839506 | -           | 0.879661449 |
| Copb1   | Q9JIF7 | 298  | ESDNNVK(*)LIVLDR(*)        | K7  | 25.9  | 1000   | 1.68085106 | -          | 2.32584269  | 2.003346881 |
| Ddx21   | Q9JIK5 | 750  | GK(*)LGVC(+57.02)FDVR(*)   | K2  | 53.59 | 1000   | 1.34693877 | 1.11111111 | 1.47959183  | 1.312547241 |
| Eny2    | Q9JIX0 | 19   | AAINQK(*)LIETGER(*)        | K6  | 59.47 | 1000   | 1.10280373 | 0.94871794 | 0.91208791  | 0.987869866 |
| Iqgap1  | Q9JKF1 | 1562 | ISLK(*)YTAAR(*)            | K4  | 24.95 | 1000   | -          | 1.46835443 | -           |             |
| Hyou1   | Q9JKR6 | 391  | VPK(*)VQEVLLK(*)           | K3  | 40.92 | 102.29 | -          | 0.72368421 | 1.19101123  | 0.957347724 |
| Usp14   | Q9JMA1 | 291  | YLFTGLK(*)LR(*)            | K7  | 65.27 | 1000   | 0.94505494 | 1.06756756 | 0.97727272  | 0.996631747 |
| Prep    | Q9QUR6 | 172  | VK(*)FTC(+57.02)MAWTHDG    | K2  | 24.97 | 183.46 | -          | -          | 2.793478261 |             |

|          |        |      |                            |     |       |        |            |            |            |             |
|----------|--------|------|----------------------------|-----|-------|--------|------------|------------|------------|-------------|
| Plec     | Q9QXS1 | 1983 | VLTEK(*)LAAISEATR(*)       | K5  | 93.41 | 1000   | 1.18085106 | 0.97435897 | 1.22222222 | 1.125810753 |
| Plec     | Q9QXS1 | 2460 | EK(*)MQAVQEATR(*)          | K2  | 67.36 | 1000   | -          | 0.58974359 | 1.28888888 | 0.93931624  |
| Plec     | Q9QXS1 | 4482 | FPVTEAVNK(*)GLVDK(*)       | K9  | 64.79 | 81.69  | 0.86170212 | 0.93589743 | 1.12222222 | 0.973273929 |
| Plec     | Q9QXS1 | 311  | EK(*)LLLWSQR(*)            | K2  | 63.28 | 1000   | 0.86170212 | 0.94871794 | 2.13333333 | 1.31458447  |
| Plec     | Q9QXS1 | 3060 | ATVSAPFGK(*)FQGR(*)        | K9  | 47.09 | 1000   | -          | 1.07692307 | -          | -           |
| Plec     | Q9QXS1 | 748  | LDLQYAK(*)LLNSSK(*)        | K7  | 43.37 | 62.39  | 1.21276595 | -          | 0.88888888 | 1.050827423 |
| Plec     | Q9QXS1 | 2660 | AK(*)LEQLFQDEVAK(*)        | K2  | 35.4  | 236.99 | -          | 1.66666666 | -          | -           |
| Plec     | Q9QXS1 | 2561 | QAEEIGEK(*)LHR(*)          | K8  | 33.67 | 1000   | -          | 1.23076923 | 1.52222222 | 1.376495727 |
| Plec     | Q9QXS1 | 4511 | TK(*)MSAAQALK(*)           | K2  | 24.33 | 113.97 | -          | 1.55128205 | 1.36666666 | 1.458974359 |
| Plec     | Q9QXS1 | 2033 | R(*)LEEQAALHK(*)ADIEER(*)  | K10 | 22.82 | 1000   | -          | 1.38461538 | -          | -           |
| Plec     | Q9QXS1 | 4147 | DK(*)LLSAER(*)             | K2  | 19.61 | 1000   | -          | -          | 1.25555556 | -           |
| Plec     | Q9QXS1 | 247  | FHK(*)LQNVQIALDYLR(*)      | K3  | 18.35 | 1000   | -          | 2.62820512 | -          | -           |
| Plec     | Q9QXS1 | 2055 | QK(*)GLVEDTLR(*)           | K2  | 15.33 | 1000   | -          | 1.73076923 | -          | -           |
| Dnaja2   | Q9QYJ0 | 134  | TTK(*)LQLSK(*)             | K3  | 35.62 | 95.62  | -          | 0.88607594 | 0.90625    | 0.896162975 |
| Esd      | Q9R0P3 | 4    | A(+42.01)LK(*)QISSNR(*)    | K3  | 84.42 | 1000   | 0.95744680 | 0.95121951 | 0.94736842 | 0.952011581 |
| Ptges3   | Q9R0Q7 | 33   | DVNVNFEK(*)SK(*)           | K8  | 87.65 | 33.18  | -          | 34.8717948 | -          | -           |
| Ptges3   | Q9R0Q7 | 35   | SK(*)LTFSC(+57.02)LGGSDNFI | K2  | 79.21 | 181.47 | 0.94505494 | 0.91025641 | 1.28409090 | 1.046467421 |
| Acot9    | Q9R0X4 | 102  | DK(*)YVTVQNTVR(*)          | K2  | 32.92 | 1000   | 1.27368421 | -          | 1.45348837 | 1.363586292 |
| Psma4    | Q9R1P0 | 205  | TMDVSK(*)LSAEK(*)          | K6  | 57.3  | 52.68  | -          | 1.63157894 | 0.66666666 | 1.149122807 |
| Sae1     | Q9R1T2 | 49   | VLIVGMK(*)GLGAEIAK(*)      | K7  | 71    | 161.77 | 0.95       | 0.90909090 | 0.76595744 | 0.875016119 |
| Vapa     | Q9WV55 | 188  | LQGEMMK(*)LSEENR(*)        | K7  | 19.14 | 1000   | 2.77528089 | -          | -          | -           |
| Vapa     | Q9WV55 | 125  | EAK(*)PDELMDSK(*)LR(*)     | K11 | 15.74 | 78.75  | -          | 2          | -          | -           |
| Tagln2   | Q9WVA4 | 54   | ENFQK(*)WLK(*)             | K5  | 38.77 | 32.69  | -          | 1.23456790 | 0.90322580 | 1.068896854 |
| Ehd1     | Q9WVK4 | 32   | QLYAQK(*)LLPLEEHYR(*)      | K6  | 33.21 | 1000   | 1.57777777 | 0.8375     | -          | 1.207638889 |
| Eif2s3x  | Q9Z0N1 | 183  | LK(*)HILILQNK(*)           | K2  | 58.6  | 217.23 | 1.36263736 | 0.7        | -          | 1.031318682 |
| Eif2s3x  | Q9Z0N1 | 80   | NITIK(*)LGYANAK(*)         | K5  | 38.99 | 127.53 | 2.04395604 | 1.1875     | 0.69565217 | 1.309036073 |
| Eif2s3x  | Q9Z0N1 | 285  | GGVAGGSILK(*)GVLK(*)       | K10 | 35.31 | 63.97  | 0.83516483 | 1.6125     | -          | 1.223832418 |
| Aldh18a1 | Q9Z110 | 649  | IHAGPK(*)FASYLTFSPSEVK(*)  | K6  | 27.22 | 187.28 | -          | 2.22077922 | -          | -           |
| Vars     | Q9Z1Q9 | 951  | HFC(+57.02)NK(*)LWNATK(*)  | K5  | 56.83 | 69.64  | -          | 0.89473684 | 1.10752688 | 1.001131862 |
| Vars     | Q9Z1Q9 | 842  | LTGK(*)LPFR(*)             | K4  | 13.42 | 1000   | 1.21978022 | 2.19736842 | -          | 1.708574321 |
| Ilf3     | Q9Z1X4 | 100  | VGLVAK(*)GLLLK(*)          | K6  | 52.32 | 95.62  | 1.31182795 | -          | 1.14772727 | 1.229777615 |
| Hnrnpc   | Q9Z204 | 39   | SDVEAIFSK(*)YGK(*)         | K9  | 60.07 | 40.63  | 0.45360824 | 0.34615384 | 0.63333333 | 0.477698475 |
| Hnrnpc   | Q9Z204 | 39   | K(*)SDVEAIFSK(*)YGK(*)     | K10 | 54.11 | 32.97  | -          | 0.66666666 | -          | -           |
| Hnrnpc   | Q9Z204 | 207  | QK(*)VDSLLESLEK(*)         | K2  | 25.01 | 112.95 | 1.11340206 | 1.26923076 | -          | 1.191316416 |

|       |        |     |                 |    |       |       |   |              |
|-------|--------|-----|-----------------|----|-------|-------|---|--------------|
| Psma7 | Q9Z2U0 | 52  | SVAK(*)LQDER(*) | K4 | 20.07 | 1000  | - | 1.04054054 - |
| Sart1 | Q9Z315 | 183 | LLNQK(*)LGK(*)  | K5 | 20.34 | 57.45 | - | 0.98684210 - |
