# Supplementary material for: Quantitative Proteomics Analysis Expands the Roles of Lysine β‐Hydroxybutyrylation Pathway in Response to Environmental β‐Hydroxybutyrate
Source: Hindawi journal article supplement (doi:10.1155/2022/4592170), 2022-01-01
Supplement: f1 [file 4592170.f1.zip]

**Table S2: The identification of Kac sites and substrates.**

| Gene name | UniprotID | Site in pI | Peptide                          | Position | Quality Score | Score  | Ratio: Samp | Ratio: Sam | Ratio: Sam | Ratio: average |
|-----------|-----------|------------|----------------------------------|----------|---------------|--------|-------------|------------|------------|----------------|
| Cul4b     | A2A432    | 872        | FIC(+57.02)NDDFK(*)HK(*)         | K8       | 57.45         | 33.18  | 0.7872340   | 1.162162   | 1.1666666  | 1.0386876      |
| Cul4b     | A2A432    | 582        | DK(*)VDHIIDTC(+57.02)FLK(*)      | K2       | 52.98         | 175.94 | -           | -          | 1.0222222  | 1.0222222      |
| Cul4b     | A2A432    | 766        | LQEIFK(*)TFYLGK(*)               | K6       | 49.32         | 113.99 | 0.7021276   | 1.108108   | 0.9        | 0.9034119      |
| Tanc2     | A2A690    | 14         | MLLTGGK(*)SSR(*)                 | K7       | 58.1          | 1000   | -           | -          | -          | -              |
| Gpatch8   | A2A6A1    | 61         | LGQGLGK(*)SLQGR(*)               | K7       | 38.61         | 1000   | 1.2234042   | 0.460526   | 0.9090909  | 0.8643405      |
| Chd5      | A2A8L1    | 945        | NMPAK(*)TELIVR(*)                | K5       | 23.49         | 1000   | -           | -          | 0.4761904  | 0.4761904      |
| Osbp19    | A2A8Z1    | 688        | DIDAATEAK(*)HR(*)                | K9       | 45.9          | 1000   | 1.5384615   | 1.253333   | 1.525641   | 1.4391453      |
| Sh3pxd2b  | A2AAY5    | 565        | GSSPK(*)PPGMILPMIPAK(*)HAPLA     | K17      | 7.42          | 143.73 | 1.1022727   | -          | -          | -              |
| Dock11    | A2AF47    | 1342       | VHDAWLSK(*)HFGIDR(*)             | K8       | 36.58         | 1000   | 0.7052631   | -          | 0.8295454  | 0.7674043      |
| Dock11    | A2AF47    | 1147       | NLLIK(*)HAFDTR(*)                | K5       | 35.89         | 1000   | 1.0210526   | 0.715596   | 1.181818   | 0.9728224      |
| Med12     | A2AGH6    | 1800       | SQPATK(*)NEDYGMGPGR(*)           | K6       | 60.64         | 1000   | 0.4179104   | 0.662337   | 0.366279   | 0.4821757      |
| Ckap5     | A2AGT5    | 1761       | TLK(*)TLLHTLC(+57.02)K(*)        | K3       | 59.89         | 171.6  | -           | -          | 0.7666666  | 0.7666666      |
| Ckap5     | A2AGT5    | 940        | QHVK(*)NLGIPVITVLGDSK(*)         | K4       | 41.68         | 189.02 | 1.4         | -          | 1.111111   | 1.2555556      |
| Ckap5     | A2AGT5    | 1799       | MMK(*)HSMDQTGSK(*)               | K3       | 33.2          | 119.03 | 1.06        | -          | 1.233333   | 1.1466667      |
| Ckap5     | A2AGT5    | 200        | DAVK(*)HTLQNINSVQLK(*)           | K4       | 32.11         | 89.67  | -           | -          | 0.7888888  | 0.7888888      |
| Ckap5     | A2AGT5    | 761        | AFISNVK(*)TALAATNPAVR(*)         | K7       | 20.1          | 1000   | 1.45        | -          | 1.177777   | 1.3138889      |
| Ubr4      | A2AN08    | 4817       | GQVVTGK(*)TALLK(*)               | K6       | 54.23         | 107.29 | -           | 0.807692   | 0.956043   | 0.8818681      |
| Ubr4      | A2AN08    | 1432       | FFTK(*)LFQLTEK(*)                | K4       | 36.44         | 95.63  | 1.3888888   | -          | 0.802197   | 1.0955433      |
| Ubr4      | A2AN08    | 3570       | LIGSHTISK(*)VTVK(*)              | K9       | 34.13         | 44.28  | -           | -          | 0.8131868  | 0.8131868      |
| Ubr4      | A2AN08    | 920        | EVEENWSK(*)HFSSDAAPQPR(*)        | K8       | 17.1          | 1000   | -           | -          | 1.1978021  | 1.1978021      |
| Tpx2      | A2APB8    | 58         | GIGEPFQGK(*)NSLR(*)              | K9       | 51.59         | 1000   | 1.6785714   | 0.704545   | 1.125      | 1.1693723      |
| Tpx2      | A2APB8    | 492        | SPVFALK(*)NR(*)                  | K7       | 29.17         | 1000   | -           | 0.693181   | 0.567307   | 0.6302448      |
| Tpx2      | A2APB8    | 523        | AQPVPHYGVYPK(*)PHIAEAR(*)        | K12      | 26.43         | 1000   | -           | -          | 0.6346153  | 0.6346153      |
| Tpx2      | A2APB8    | 608        | AEMWK(*)HQLLEEQK(*)              | K5       | 8.65          | 131.72 | -           | -          | 1.0288461  | 1.0288461      |
| Ppig      | A2AR02    | 61         | STQK(*)PLHYK(*)SC(+57.02)LFHR(*) | K9       | 75.58         | 61.26  | 0.75        | -          | 0.765217   | 0.7576087      |
| Ppig      | A2AR02    | 705        | SSTLK(*)NQEDEK(*)                | K5       | 8.04          | 64.21  | 1.16        | -          | -          | -              |
| Ppig      | A2AR02    | 383        | GDK(*)SELNEIK(*)                 | K3       | 4.58          | 34.57  | -           | -          | 0.7739130  | 0.7739130      |
| Upf2      | A2AT37    | 364        | EYFTSLTK(*)HLK(*)                | K8       | 29.25         | 24.24  | -           | 0.946236   | 0.850574   | 0.8984056      |
| Rabgap1   | A2AWA9    | 803        | LMELAC(+57.02)NTK(*)ISQK(*)      | K9       | 12.72         | 38.03  | -           | 1.914634   | -          | -              |
| Mga       | A2AWL7    | 2038       | AGSK(*)NIDIMALQSIR(*)            | K4       | 12.51         | 1000   | -           | -          | -          | -              |
| Arid1a    | A2BH40    | 2018       | LILLHHK(*)HPER(*)                | K7       | 65            | 1000   | 0.8484848   | 0.479338   | 1.46875    | 0.9321912      |

|        |        |      |                                  |     |       |        |           |          |                    |
|--------|--------|------|----------------------------------|-----|-------|--------|-----------|----------|--------------------|
| Kansl3 | A2RSY1 | 544  | TK(*)VTTVTSTQK(*)                | K2  | 22.53 | 54.49  | -         | -        | -                  |
| Trmt1l | A2RSY6 | 220  | YIAASTAK(*)SSNEILK(*)            | K8  | 34.07 | 34.57  | -         | -        | 0.539130435        |
| Chd6   | A3KFM7 | 1903 | GK(*)NLSFHQDEAK(*)               | K2  | 62.92 | 235.31 | 0.8172043 | 0.631578 | - 0.7243916        |
| Phrf1  | A6H619 | 768  | GK(*)GIGSSFESFR(*)               | K2  | 41.37 | 1000   | -         | 0.530487 | 1.573529 1.0520086 |
| Armt1  | A6H630 | 40   | HK(*)SEFFEK(*)                   | K2  | 79.62 | 95.35  | -         | 1.015384 | -                  |
| Wdr76  | A6PWY4 | 105  | ALSSK(*)ADSLLLK(*)               | K5  | 51.78 | 148.49 | -         | -        | 1.468085106        |
| Thada  | A8C756 | 1649 | LASK(*)IIAYR(*)                  | K4  | 28.47 | 1000   | -         | -        | 1.166666667        |
| Slfn9  | B1ARD6 | 643  | DFIQAK(*)NIC(+57.02)QAVTR(*)     | K6  | 17.33 | 1000   | 0.9662921 | -        | 1.176470 1.0713814 |
| Thoc2  | B1AZI6 | 1106 | LTK(*)ASVHC(+57.02)LETGEYTHIR(*) | K3  | 76.2  | 1000   | 0.8       | 0.897435 | 1.022727 0.9067211 |
|        | B2KF05 |      | ESC(+57.02)SK(*)HASGTSFHLPQPSF   | K5  | 72.96 | 1000   | -         | -        | -                  |
| Cad    | B2RQC6 | 2036 | HPQPGAVELAAK(*)HC(+57.02)R(*)    | K12 | 94.76 | 1000   | 0.7916666 | 0.772151 | 0.989247 0.851022  |
| Cad    | B2RQC6 | 1325 | NK(*)SELLPTVR(*)                 | K2  | 93.03 | 1000   | 0.8541666 | 0.898734 | 1.032258 0.9283863 |
| Cad    | B2RQC6 | 1411 | LSSFVTK(*)GYR(*)                 | K7  | 83.3  | 1000   | 0.8541666 | -        | 0.913978 0.8840726 |
| Cad    | B2RQC6 | 754  | VSTK(*)IGSC(+57.02)MK(*)         | K4  | 82.88 | 102.87 | 0.7291666 | 0.734177 | 0.978494 0.8139462 |
| Cad    | B2RQC6 | 1313 | IPEK(*)NILLTIGSYK(*)             | K4  | 77.12 | 149.94 | 0.8333333 | 0.696202 | 0.881720 0.8037521 |
| Cad    | B2RQC6 | 1934 | QFTK(*)DQMSHLFNVAHTLR(*)         | K4  | 62.91 | 1000   | 0.8958333 | -        | 1 0.9479167        |
| Cad    | B2RQC6 | 2082 | TITMVGDLK(*)HGR(*)               | K9  | 50.08 | 1000   | 0.5520833 | -        | -                  |
| Cad    | B2RQC6 | 1323 | NILLTIGSYK(*)NK(*)               | K10 | 41.58 | 36.05  | -         | -        | 0.612903226        |
| Cad    | B2RQC6 | 1625 | K(*)EEILLIK(*)TAK(*)             | K8  | 34.88 | 24.24  | 0.8854166 | 0.746835 | 0.913978 0.8487435 |
| Cad    | B2RQC6 | 2082 | EELGTVNGMTITMVGDLK(*)HGR(*)      | K18 | 27.7  | 1000   | -         | -        | 2.666666667        |
| Brpf1  | B2RRD7 | 147  | ENTETPAATPK(*)SGK(*)             | K11 | 32.01 | 32.97  | -         | -        | -                  |
| Gnai1  | B2RSH2 | 197  | DLHFK(*)MFDVGGQR(*)              | K5  | 40.03 | 1000   | -         | -        | -                  |
| Ep300  | B2RWS6 | 1559 | TSK(*)NK(*)SSLSR(*)              | K5  | 90.41 | 1000   | -         | 1.029411 | 0.84375 0.9365809  |
| Ep300  | B2RWS6 | 1557 | TSK(*)NK(*)SSLSR(*)              | K3  | 90.41 | 1000   | -         | 1.029411 | 0.84375 0.9365809  |
| Ep300  | B2RWS6 | 1179 | K(*)LEFSPQTL C(+57.02)C(+57.02)Y | K14 | 77.46 | 163.91 | -         | 0.779411 | 0.9375 0.8584559   |
| Ep300  | B2RWS6 | 1541 | EENTSNESTDVTK(*)GDSK(*)NAK(*)    | K13 | 63.92 | 53.63  | -         | -        | -                  |
| Ep300  | B2RWS6 | 1636 | DK(*)HLEFSSLR(*)                 | K2  | 52.33 | 1000   | -         | 0.882352 | 0.989583 0.9359681 |
| Ep300  | B2RWS6 | 1545 | EENTSNESTDVTK(*)GDSK(*)NAK(*)K   | K17 | 29.73 | 77.13  | -         | 1.161764 | 0.895833 1.028799  |
| Ep300  | B2RWS6 | 1541 | EENTSNESTDVTK(*)GDSK(*)NAK(*)K   | K13 | 29.73 | 107.73 | -         | 1.161764 | 0.895833 1.028799  |
| Ep300  | B2RWS6 | 1541 | EENTSNESTDVTK(*)GDSK(*)          | K13 | 25.62 | 31.27  | -         | 1.823529 | 1.4375 1.6305147   |
| Ep300  | B2RWS6 | 1557 | NNK(*)K(*)TSK(*)NK(*)            | K7  | 21.84 | 30.83  | -         | 0.382352 | -                  |
| Ep300  | B2RWS6 | 1554 | NNK(*)K(*)TSK(*)NK(*)            | K4  | 21.84 | 100.21 | -         | 0.382352 | -                  |
| Ep300  | B2RWS6 | 1553 | NNK(*)K(*)TSK(*)NK(*)            | K3  | 21.84 | 123.86 | -         | 0.382352 | -                  |
| Ep300  | B2RWS6 | 1559 | NK(*)SSLSR(*)                    | K2  | 13.14 | 1000   | -         | -        | 1.375              |

|           |        |      |                                     |     |       |        |           |          |             |           |
|-----------|--------|------|-------------------------------------|-----|-------|--------|-----------|----------|-------------|-----------|
| Trappc11  | B2RXC1 | 674  | FVAK(*)TEDVGK(*)                    | K4  | 16.38 | 41.24  | -         | 0.88     | 0.699029    | 0.7895146 |
| Plxnb2    | B2RXS4 | 1239 | IK(*)SQLEGLEESVR(*)                 | K2  | 3.87  | 1000   | -         | -        | 0.935483871 |           |
| Dock5     | B2RY04 | 497  | AIHPGAGYEGVSEYK(*)SVVYYQVK(*)       | K15 | 36.28 | 150.89 | -         | -        | 1.108108108 |           |
| Rbm25     | B2RY56 | 63   | SIM(+15.99)APAPTVLVPTVSMVGK(*)      | K19 | 53.18 | 1000   | 1.41      | -        | 0.772727    | 1.0913636 |
| Rbm25     | B2RY56 | 160  | LLVK(*)VDAK(*)                      | K4  | 42.66 | 42.89  | -         | -        | 1.011363636 |           |
| Rbm25     | B2RY56 | 734  | HIK(*)SLIEK(*)                      | K3  | 11.26 | 81.69  | 1.43      | -        | 1.25        | 1.34      |
| Qtrt2     | B8ZXI1 | 399  | EALK(*)NDTLAQLK(*)                  | K4  | 34.42 | 75.39  | -         | -        | 0.87012987  |           |
| Mfap1b    | C0HKD9 | 376  | TILPK(*)VMQVK(*)                    | K5  | 25.81 | 38.33  | -         | -        | 0.547368421 |           |
| Mfap1b    | C0HKD9 | 381  | VMQVK(*)NFRG(*)                     | K5  | 9.03  | 1000   | 0.9897959 | 1.635135 | -           | 1.3124655 |
| Hist1h2an | C0HKE7 | 10   | GK(*)QGSK(*)AR(*)                   | K6  | 99.68 | 1000   | -         | 2.071428 | -           |           |
| Hist1h2an | C0HKE7 | 6    | GK(*)QGSK(*)AR(*)                   | K2  | 99.68 | 1000   | -         | 2.071428 | -           |           |
| Hist1h2an | C0HKE7 | 96   | NDEELNK(*)LLGR(*)                   | K7  | 87.82 | 1000   | 0.9484536 | 0.892857 | 1.023255    | 0.9548555 |
| Rnaset2b  | C0HKG6 | 121  | HEWVK(*)HGTC(+57.02)AAQVDALN        | K5  | 22.71 | 70.13  | -         | -        | 0.637362637 |           |
| Samd1     | D3YXK1 | 88   | VSYK(*)GSISYR(*)                    | K4  | 13.76 | 1000   | -         | -        | -           |           |
| Safb      | D3YXK2 | 445  | ATDLK(*)NLFGR(*)                    | K5  | 60.43 | 1000   | 1.0804597 | 0.959459 | 1.033707    | 1.0245424 |
| Safb      | D3YXK2 | 600  | GVPVISVK(*)TSGSK(*)                 | K8  | 49.41 | 47.14  | 1.4022988 | 0.783783 | 1.460674    | 1.2155856 |
| Safb      | D3YXK2 | 54   | NLDSSGNK(*)SVLMER(*)                | K8  | 17.99 | 1000   | 1.2988505 | 2.148648 | 1.595505    | 1.6810016 |
| Obsl1     | D3YYU8 | 261  | TFWVNEGK(*)HAK(*)                   | K8  | 70.88 | 20.7   | -         | -        | 1.139240506 |           |
| Obsl1     | D3YYU8 | 687  | LILQAVK(*)HR(*)                     | K7  | 32.41 | 1000   | 1.6024096 | 1.232876 | 1.265822    | 1.3670364 |
| Ccdc6     | D3YZP9 | 259  | FLK(*)NEVER(*)                      | K3  | 61.85 | 1000   | 0.9203539 | 0.790697 | 0.849056    | 0.8533694 |
| Gls       | D3Z7P3 | 169  | FITALK(*)STGLR(*)                   | K6  | 87.5  | 1000   | 0.7741935 | 0.835443 | 0.882978    | 0.8308718 |
| Gls       | D3Z7P3 | 284  | HSIGDTK(*)VPFC(+57.02)LQSC(+57.02)  | K7  | 13.98 | 55.8   | 1.2043010 | 0.835443 | -           | 1.0198721 |
| Gcn1      | E9PVA8 | 2183 | SK(*)ADYSSHLR(*)                    | K2  | 65.79 | 1000   | 0.7575757 | -        | 1.021978    | 0.8897769 |
| Gcn1      | E9PVA8 | 2418 | FVIQGAGSK(*)VDAAIR(*)               | K9  | 65.14 | 1000   | 0.7575757 | 0.636363 | 0.868131    | 0.7540238 |
| Gcn1      | E9PVA8 | 914  | LK(*)TLGTLVSHVTLR(*)                | K2  | 55.52 | 1000   | 0.6868686 | -        | 0.989010    | 0.8379398 |
| Gcn1      | E9PVA8 | 436  | VFSK(*)TSTSAVR(*)                   | K5  | 54.93 | 1000   | 0.9393939 | 1.025974 | 0.857142    | 0.9408369 |
| Gcn1      | E9PVA8 | 308  | GLANQLK(*)SNSPR(*)                  | K7  | 51.75 | 1000   | 1.0808080 | 0.779220 | 1.186813    | 1.015614  |
| Gcn1      | E9PVA8 | 929  | LLK(*)PEC(+57.02)ALDK(*)            | K3  | 45.75 | 41.33  | 0.6868686 | 0.597402 | 1.186813    | 0.8236948 |
| Gcn1      | E9PVA8 | 936  | LLK(*)PEC(+57.02)ALDK(*)SWC(+57.02) | K10 | 40.72 | 23.7   | -         | -        | 0.78021978  |           |
| Gcn1      | E9PVA8 | 561  | LTNSK(*)VQQYYR(*)                   | K5  | 36.8  | 1000   | 0.8484848 | -        | 1.868131    | 1.3583084 |
| Gcn1      | E9PVA8 | 268  | DLILPTIQK(*)SLLR(*)                 | K9  | 6.16  | 1000   | -         | -        | 1.384615385 |           |
| Mki67     | E9PVX6 | 1136 | TGLSK(*)VDVR(*)                     | K5  | 62    | 1000   | 0.8229166 | 0.675675 | 1.528735    | 1.0091093 |
| Mki67     | E9PVX6 | 156  | SFVYAK(*)GLSADSPASDGSK(*)           | K6  | 44.45 | 119.02 | 1.2916666 | 0.986486 | 0.816091    | 1.031415  |
| Mki67     | E9PVX6 | 275  | AK(*)SSGSTPVTAASSPK(*)              | K2  | 43.75 | 185.37 | 0.9166666 | 0.554054 | -           | 0.7353604 |

|        |        |      |                               |     |       |        |           |          |             |           |
|--------|--------|------|-------------------------------|-----|-------|--------|-----------|----------|-------------|-----------|
| Mki67  | E9PVX6 | 1372 | LSK(*)TDLSK(*)                | K3  | 29.86 | 61.26  | -         | 1.216216 | 3.252873    | 2.2345449 |
| Mki67  | E9PVX6 | 1721 | LAK(*)TSVGNI AVR(*)           | K3  | 27.6  | 1000   | -         | -        | 1.114942529 |           |
| Mki67  | E9PVX6 | 2928 | DHATLQSK(*)SNPLLSPK(*)        | K8  | 10.21 | 21.55  | -         | 0.716216 | -           |           |
| Prr12  | E9PYL2 | 615  | GK(*)GDGSELLAGPGGSAAER(*)     | K2  | 83.07 | 1000   | -         | -        | -           |           |
| Ascc3  | E9PZJ8 | 573  | ELTGDMQLSK(*)SEILR(*)         | K10 | 88.87 | 1000   | 0.8811881 | 0.826666 | 0.835051    | 0.8476354 |
| Ascc3  | E9PZJ8 | 1826 | IASYYYLK(*)HK(*)              | K8  | 57.12 | 22.85  | 0.7326732 | 0.653333 | 0.855670    | 0.7472256 |
| Ascc3  | E9PZJ8 | 302  | FLNSSSDHK(*)FQVLQDSC(+57.02)K | K9  | 36.05 | 100.79 | -         | -        | 0.886597938 |           |
| Ascc3  | E9PZJ8 | 1145 | LEEK(*)NLTVDK(*)              | K4  | 31.59 | 121.92 | 0.6336633 | 1.28     | 0.876288    | 0.929984  |
| Chd2   | E9PZM4 | 623  | LK(*)NDDSLLYK(*)              | K2  | 46.33 | 117.11 | -         | -        | 1.739130435 |           |
| Arid1b | E9Q4N7 | 603  | SQPPLAPGK(*)SNHEDLNLIQQR(*)   | K9  | 96.63 | 1000   | 0.7884615 | 0.551724 | 0.759259    | 0.699815  |
| Rnf213 | E9Q555 | 483  | STGFFQQA K(*)NR(*)            | K9  | 41.76 | 1000   | -         | -        | 0.814814815 |           |
| Rnf213 | E9Q555 | 4210 | FLK(*)HVEEFC(+57.02)TR(*)     | K3  | 39.76 | 1000   | 1.1       | 0.371794 | 1           | 0.8239316 |
| Rnf213 | E9Q555 | 3130 | LEK(*)HYLDMNTVLQPWQK(*)       | K3  | 28.79 | 88.07  | -         | -        | 0.314814815 |           |
| Nolc1  | E9Q5C9 | 123  | ASVPQHAGK(*)AAAK(*)           | K9  | 40.75 | 55.36  | 0.7934782 | 1.038461 | 0.956521    | 0.9294872 |
| Setd2  | E9Q5F9 | 360  | SSAPSK(*)SEDLGK(*)            | K6  | 44.16 | 23.13  | -         | -        | -           |           |
| Kif23  | E9Q5G3 | 398  | LTHLFK(*)NYFDGEGK(*)          | K6  | 30.07 | 131.34 | 0.2072072 | -        | 0.561224    | 0.3842158 |
| Ythdc1 | E9Q5K9 | 90   | GK(*)SVTEYK(*)                | K2  | 79.83 | 123.86 | 1.0985915 | 0.826086 | 0.909090    | 0.9445898 |
| Bod1l  | E9Q6J5 | 534  | SQGK(*)STVDLEDSSAK(*)         | K4  | 69.16 | 176.98 | 1.71      | 0.743589 | 1.269662    | 1.2410842 |
| Bod1l  | E9Q6J5 | 1386 | ISIPLADK(*)SMSVTGDNK(*)       | K8  | 36.84 | 67.89  | 0.91      | 0.935897 | 1.235955    | 1.0272842 |
| Numa1  | E9Q7G0 | 907  | EVAC(+57.02)LK(*)TLVLK(*)     | K6  | 49.36 | 81.69  | 1.7204301 | 0.855263 | 0.846153    | 1.1406157 |
| Numa1  | E9Q7G0 | 977  | AALIK(*)SQGQQQEER(*)          | K5  | 7.69  | 1000   | 1.4408602 | -        | -           |           |
| Tpr    | F6ZDS4 | 787  | SQNTK(*)ISTQLDFASK(*)         | K5  | 97.89 | 251.58 | 1.0439560 | 0.948051 | 0.977528    | 0.9898454 |
| Tpr    | F6ZDS4 | 326  | TSNEHLQK(*)HVEDLLTK(*)        | K8  | 88.61 | 73.05  | 1.0769230 | 0.935064 | 1.011235    | 1.0077413 |
| Tpr    | F6ZDS4 | 1750 | IK(*)PTPVVSTPSK(*)VTAAAMAGNK( | K12 | 77.36 | 66.12  | 0.8681318 | 0.584415 | 0.820224    | 0.7575907 |
| Tpr    | F6ZDS4 | 121  | FK(*)VESEQQYFEIEK(*)          | K2  | 62.18 | 294.89 | 1.4065934 | 1.584415 | 1.089887    | 1.3602989 |
| Tpr    | F6ZDS4 | 1062 | QVTEEVHK(*)NIEVR(*)           | K8  | 61.83 | 1000   | 1.3076923 | 1.012987 | 1.269662    | 1.1967807 |
| Tpr    | F6ZDS4 | 373  | SAADDSEAK(*)SNELTR(*)         | K9  | 45.67 | 1000   | -         | -        | 1.314606742 |           |
| Tpr    | F6ZDS4 | 1030 | LK(*)TSTSNVEQYR(*)            | K2  | 44.24 | 1000   | 1.3296703 | 0.870129 | 1.191011    | 1.1302705 |
| Tpr    | F6ZDS4 | 1673 | MTALK(*)SQYEGR(*)             | K5  | 40.58 | 1000   | 1.0329670 | 1.025974 | 0.910112    | 0.9896845 |
| Tpr    | F6ZDS4 | 364  | LSNLYK(*)SAADDSEAK(*)         | K6  | 38.12 | 107.04 | 1.0219780 | 1.090909 | 1.011235    | 1.0413744 |
| Tpr    | F6ZDS4 | 1609 | QDLQDK(*)TTEEQLR(*)           | K6  | 34.6  | 1000   | -         | -        | 0.865168539 |           |
| Tpr    | F6ZDS4 | 1563 | DTLSQSETK(*)TK(*)             | K9  | 29.37 | 25.66  | 1.7142857 | -        | 1.426966    | 1.570626  |
| Tpr    | F6ZDS4 | 551  | ANK(*)HSSVLER(*)              | K3  | 20.99 | 1000   | -         | 1.038961 | 1.280898    | 1.15993   |
| Tpr    | F6ZDS4 | 1718 | QITLK(*)TTPASGER(*)           | K5  | 9.24  | 1000   | 1.3406593 | 0.857142 | -           | 1.0989011 |

|         |        |      |                                  |     |       |        |           |           |           |           |
|---------|--------|------|----------------------------------|-----|-------|--------|-----------|-----------|-----------|-----------|
| Farp1   | F8VPU2 | 696  | LMHYK(*)HVLER(*)                 | K5  | 82.16 | 1000   | 0.9222222 | 0.825     | 0.9456521 | 0.8976248 |
| Farp1   | F8VPU2 | 775  | LSGK(*)GLQQR(*)                  | K4  | 60.72 | 1000   | -         | 0.9625    | -         | -         |
| Farp1   | F8VPU2 | 638  | NIQGMK(*)HLAAHLWK(*)             | K6  | 56.35 | 192.66 | 1.1888888 | -         | 0.9565211 | 1.0727053 |
| Farp1   | F8VPU2 | 1006 | LHFK(*)SHVYFR(*)                 | K4  | 51.66 | 1000   | -         | -         | 0.8369565 | 0.8369565 |
| Farp1   | F8VPU2 | 646  | HLAAHLWK(*)HSEALEALETISK(*)      | K8  | 46.09 | 137.95 | 1.0666666 | -         | 1.1195651 | 1.0931159 |
| Farp1   | F8VPU2 | 265  | INAFNWAK(*)VR(*)                 | K8  | 44.42 | 1000   | 0.7666666 | -         | 0.7065211 | 0.7365942 |
| Farp1   | F8VPU2 | 303  | DFC(+57.02)K(*)SFWK(*)           | K4  | 32.41 | 76.73  | 1.6       | -         | 0.9565211 | 1.2782609 |
| Farp1   | F8VPU2 | 632  | IGDVMLK(*)NIQGMK(*)              | K7  | 31.37 | 81.36  | -         | 1.5625    | 1.1304341 | 1.3464674 |
| Farp1   | F8VPU2 | 704  | LC(+57.02)K(*)HPPNHADFR(*)       | K3  | 19.65 | 1000   | -         | 0.925     | 1.0978261 | 1.011413  |
| Atp2b1  | G5E829 | 590  | SMSTVLK(*)NSDGSFR(*)             | K7  | 64.68 | 1000   | -         | 0.6666666 | -         | -         |
| Atp2b1  | G5E829 | 601  | IFSK(*)GASEIILK(*)               | K4  | 43.6  | 92.28  | -         | -         | 0.7738095 | 0.7738095 |
| Atp2b1  | G5E829 | 476  | HLDAC(+57.02)ETMGNATAIC(+57.02)  | K18 | 24.67 | 1000   | 1.1222222 | -         | -         | -         |
| Atp2b1  | G5E829 | 64   | LK(*)TSPNEGLSGNPADLER(*)         | K2  | 18.64 | 1000   | -         | -         | 1.1666666 | 1.1666666 |
| Trip12  | G5E870 | 181  | LASK(*)SATSAC(*)                 | K4  | 21.02 | 55.13  | -         | 0.846153  | 1.1204811 | 0.9833179 |
| Tubgcp6 | G5E8P0 | 1620 | QLQLFK(*)HEMQHFVK(*)             | K6  | 9.98  | 30.66  | -         | -         | -         | -         |
|         | G5E8P1 |      | GK(*)PALVR(*)                    | K2  | 98.25 | 1000   | -         | -         | -         | -         |
|         | G5E8P1 |      | HPSSPC(+57.02)SIK(*)HSPTR(*)     | K9  | 27.02 | 1000   | -         | -         | -         | -         |
|         | G5E8P1 |      | IGEHEMQTK(*)SEEK(*)              | K8  | 23.21 | 51.8   | -         | -         | -         | -         |
|         | G5E8P1 |      | SELISC(+57.02)IENGNYAK(*)AAR(*)  | K14 | 5.33  | 1000   | -         | -         | -         | -         |
| Capn2   | O08529 | 414  | GC(+57.02)TFLVGLIQK(*)HR(*)      | K11 | 71.91 | 1000   | 0.9285714 | 0.8125    | 0.9130434 | 0.884705  |
| Capn2   | O08529 | 260  | LVK(*)GHAYSVTGAEVESSGSLQK(*)     | K3  | 45.04 | 210.04 | 0.8265306 | 0.7875    | -         | 0.8070153 |
| Capn2   | O08529 | 568  | R(*)QDIK(*)SDGFSIETC(+57.02)K(*) | K5  | 41.91 | 187.15 | 0.7142857 | -         | 0.8586951 | 0.7864907 |
| Capn2   | O08529 | 360  | LTK(*)MDGNWR(*)                  | K3  | 41.75 | 1000   | 0.8979591 | -         | 0.9021731 | 0.9000665 |
| Capn2   | O08529 | 568  | QDIK(*)SDGFSIETC(+57.02)K(*)     | K4  | 35.98 | 111.13 | 2.3367346 | 0.9       | -         | 1.6183673 |
| Capn2   | O08529 | 69   | ELGPYSSK(*)TR(*)                 | K8  | 32.37 | 1000   | 4.4081632 | -         | 1.5760861 | 2.9921251 |
| Capn2   | O08529 | 603  | EFYILWTK(*)IQK(*)                | K8  | 11.49 | 22.34  | 0.8775510 | -         | 1.1086951 | 0.9931233 |
| Bin1    | O08539 | 7    | A(+42.01)EMGSK(*)GVTAGK(*)       | K6  | 41.89 | 69.64  | 0.8901098 | 0.628205  | 0.7613631 | 0.7598929 |
| Dpysl2  | O08553 | 258  | VMSK(*)SAAEVIAQAR(*)             | K4  | 56.25 | 1000   | 0.7835051 | 0.653333  | 1.7977521 | 1.0781971 |
| Dpysl2  | O08553 | 423  | TISAK(*)THNSALEYNIFEGMEC(+57.02) | K5  | 43.99 | 1000   | -         | 1.813333  | 0.7752801 | 1.2943071 |
| Dpysl2  | O08553 | 368  | MSVIWDK(*)AVVTGK(*)              | K7  | 30.77 | 37.05  | 0.5773195 | -         | -         | -         |
| Emd     | O08579 | 116  | TYGEPESVGMSK(*)SFR(*)            | K12 | 48.53 | 1000   | 1.7326732 | 0.906976  | 1.4468081 | 1.3621528 |
| Gtpbp1  | O08582 | 537  | TGDK(*)ATVHFR(*)                 | K4  | 19.55 | 1000   | -         | 0.831460  | 1.0588231 | 0.9451421 |
| Alyref  | O08583 | 85   | QLPDK(*)WQHDLFDSGFGGAGVEI        | K5  | 80.52 | 164.82 | -         | -         | 0.9780219 | 0.9780219 |
| Alyref  | O08583 | 233  | NSK(*)QQLSAEELDAQLDAYNAR(*)      | K3  | 19.17 | 1000   | 2.0104166 | -         | 1.6483511 | 1.8293842 |

|          |        |      |                                 |     |       |        |           |          |             |           |
|----------|--------|------|---------------------------------|-----|-------|--------|-----------|----------|-------------|-----------|
| Stxbp1   | O08599 | 294  | HK(*)HIAEVSQEVTR(*)             | K2  | 45.03 | 1000   | -         | 0.746666 | 0.734042    | 0.7403546 |
| Myh11    | O08638 | 817  | QQQLTAMK(*)VIQR(*)              | K8  | 45.51 | 1000   | -         | -        | -           | -         |
| Metap2   | O08663 | 385  | GVVHDDMEC(+57.02)SHYMK(*)NFI    | K14 | 54.67 | 1000   | 0.9541284 | 1.022988 | 1.208333    | 1.0618168 |
| Metap2   | O08663 | 400  | TK(*)HLLNVINENFGTLAFC(+57.02)F  | K2  | 44.18 | 1000   | -         | -        | 0.916666667 | -         |
| Prdx6    | O08709 | 106  | LPFPIIDDK(*)GR(*)               | K9  | 58.06 | 1000   | 1.0659340 | 1.014705 | 1.131868    | 1.070836  |
| Ampd3    | O08739 | 333  | FIK(*)HTYQTEPDR(*)              | K3  | 26.9  | 1000   | -         | -        | 0.454545455 | -         |
| Polr2j   | O08740 | 62   | DPQVLFAGYK(*)VPHPLEHK(*)        | K10 | 46.77 | 29.7   | -         | 0.063492 | -           | -         |
| Polr2j   | O08740 | 47   | EDHTLGNIHK(*)SQLLK(*)           | K10 | 24.33 | 55.6   | -         | -        | 0.385714286 | -         |
| Dld      | O08749 | 66   | SAQLGFK(*)TVC(+57.02)IEK(*)     | K7  | 74.24 | 134.33 | 0.94      | 0.805194 | 1.102040    | 0.9490785 |
| Dld      | O08749 | 127  | MMEQK(*)HSAVK(*)                | K5  | 70.84 | 89.05  | 0.82      | 0.818181 | -           | 0.8190909 |
| Dld      | O08749 | 159  | ITGK(*)NQVTATK(*)               | K4  | 67.87 | 142.27 | -         | -        | 0.755102041 | -         |
| Dld      | O08749 | 430  | AK(*)TNADTDGMVK(*)              | K2  | 61.77 | 111.69 | 0.96      | 0.961038 | 0.877551    | 0.9328633 |
| Dld      | O08749 | 104  | ALLNNSHYHMAHGK(*)DFASR(*)       | K15 | 15.42 | 1000   | 1.6       | 1.545454 | 0.877551    | 1.3410019 |
| Dld      | O08749 | 143  | ALTGGIAHLFK(*)QNK(*)            | K11 | 11.73 | 28.36  | -         | -        | 1.020408163 | -         |
| Hsd17b10 | O08756 | 107  | NK(*)IHTLEDFQR(*)               | K2  | 51.51 | 1000   | 1.1648351 | 1.111111 | 1.025974    | 1.1006401 |
| Ube3a    | O08759 | 28   | AAAK(*)HLIER(*)                 | K4  | 50.88 | 1000   | 0.8842105 | -        | 1.257425    | 1.0708181 |
| Tcof1    | O08784 | 327  | GPILATPGK(*)TGPAATQAK(*)        | K9  | 85.7  | 71.74  | 1.0263157 | 0.892857 | 1.170454    | 1.0298758 |
| Tcof1    | O08784 | 144  | TVNSVSHPGSGK(*)TVVHLLSGK(*)     | K12 | 76.08 | 50.04  | 1.2105263 | 1.125    | -           | 1.1677632 |
| Tcof1    | O08784 | 521  | VR(*)PVATQVK(*)TDR(*)           | K9  | 69.36 | 1000   | 0.7763157 | -        | 1.136363    | 0.9563397 |
| Tcof1    | O08784 | 468  | GANLPC(+57.02)PGK(*)VGSAAALR(*) | K9  | 66.54 | 1000   | 0.9605263 | 1.267857 | 1.215909    | 1.1480975 |
| Tcof1    | O08784 | 132  | TANK(*)TVNSVSHPGSGK(*)          | K4  | 65.02 | 106.18 | 1.5131578 | 1.357142 | 0.954545    | 1.2749487 |
| Tcof1    | O08784 | 153  | TVVHLLSGK(*)SPK(*)              | K9  | 56.7  | 49.37  | 1.3552631 | -        | -           | -         |
| Tcof1    | O08784 | 318  | GISGK(*)GPILATPGK(*)            | K5  | 53.96 | 140.79 | -         | 1.232142 | -           | -         |
| Tcof1    | O08784 | 630  | VQGK(*)SGGK(*)GLQGK(*)          | K8  | 41.41 | 58     | -         | 0.303571 | -           | -         |
| Tcof1    | O08784 | 626  | VQGK(*)SGGK(*)GLQGK(*)          | K4  | 41.41 | 123.21 | -         | 0.303571 | -           | -         |
| Tcof1    | O08784 | 635  | GLQGK(*)AALGQGVAPVHTQK(*)       | K5  | 41.03 | 102.84 | 0.7631578 | 0.625    | 1.181818    | 0.8566587 |
| Tcof1    | O08784 | 1092 | SK(*)SQHAADTALPK(*)             | K2  | 28.43 | 213.66 | -         | 1.178571 | -           | -         |
| Tcof1    | O08784 | 442  | VK(*)PLGK(*)SSQVR(*)PVSTVTPGSS  | K6  | 25.94 | 42.89  | 1         | 0.964285 | 1.363636    | 1.1093074 |
| Tcof1    | O08784 | 442  | VK(*)PLGK(*)SSQVR(*)            | K6  | 19.01 | 48.12  | -         | 1.535714 | -           | -         |
| Tcof1    | O08784 | 922  | AASQPSK(*)SEQSSR(*)             | K7  | 13.89 | 1000   | 1.1578947 | -        | -           | -         |
| Tcof1    | O08784 | 241  | TAPGPTK(*)LGNVAPTPAK(*)         | K7  | 11.62 | 59.2   | -         | 2.982142 | -           | -         |
| Dctn1    | O08788 | 262  | IQLEQVQEWK(*)SK(*)              | K10 | 72.76 | 33.18  | 0.6336633 | 0.75     | 0.706521    | 0.6967284 |
| Dctn1    | O08788 | 38   | VEVIGK(*)GHR(*)                 | K6  | 63.26 | 1000   | -         | -        | 0.989130435 | -         |
| Dctn1    | O08788 | 618  | LIC(+57.02)K(*)AELIR(*)         | K4  | 57.3  | 1000   | -         | -        | 0.815217391 | -         |



|        |        |     |                                 |     |       |        |           |          |          |           |
|--------|--------|-----|---------------------------------|-----|-------|--------|-----------|----------|----------|-----------|
| Prkcsh | O08795 | 149 | ILIEEWK(*)TAR(*)                | K7  | 64.06 | 1000   | 0.5104166 | 0.519480 | 0.774193 | 0.6013636 |
| Prkcsh | O08795 | 431 | PK(*)HGGSPSTSLGTWGSWAGPDHD      | K2  | 28.98 | 100.67 | -         | -        | 1.784946 | 237       |
| Prkcsh | O08795 | 480 | LLC(+57.02)GK(*)ETVVTSTTEPSR(*) | K5  | 20.75 | 1000   | 1.8541666 | 0.831168 | 0.548387 | 1.0779075 |
| Prdx4  | O08807 | 243 | QYTDK(*)HGEVC(+57.02)PAGWK(*)   | K5  | 5.27  | 68.81  | -         | -        | 1.585106 | 383       |
| Eftud2 | O08810 | 935 | EFMIK(*)TR(*)                   | K5  | 60.93 | 1000   | -         | -        | 0.769230 | 769       |
| Eftud2 | O08810 | 243 | LIK(*)HAVQER(*)                 | K3  | 50.55 | 1000   | 0.9890109 | 1.077922 | 1.087912 | 1.0516151 |
| Eftud2 | O08810 | 351 | LWGDIFYFNPK(*)TR(*)             | K10 | 33.57 | 1000   | -         | 0.896103 | 1.197802 | 1.046953  |
| Eftud2 | O08810 | 141 | NVTLC(+57.02)GHLHHGK(*)TC(+57   | K12 | 28.59 | 1000   | -         | -        | 1.560439 | 56        |
| RO60   | O08848 | 239 | TK(*)DDLEVIHLIEEHLVR(*)         | K2  | 13.67 | 1000   | -         | -        | 0.968085 | 106       |
| Aip    | O08915 | 103 | HVVLYPLVAK(*)SLR(*)             | K10 | 36.77 | 1000   | -         | 1.038461 | 0.912087 | 0.9752747 |
| Aip    | O08915 | 273 | GK(*)AHAAVWNAQEAQADFAK(*)       | K2  | 7.56  | 140.19 | -         | 3.051282 | -        |           |
| Aip    | O08915 | 210 | YYDAIAC(+57.02)LK(*)NLQMK(*)    | K9  | 3.16  | 38.32  | -         | -        | 2.043956 | 044       |
| Sdcbp  | O08992 | 215 | DSSGHVGFIFK(*)SGK(*)            | K11 | 29.15 | 20.7   | 0.1367521 | -        | 0.463035 | 0.2998936 |
| Sdcbp  | O08992 | 180 | VLK(*)QAFGEK(*)                 | K3  | 14.32 | 85.52  | 0.0987654 | 0.484662 | 0.377431 | 0.3202866 |
| Atox1  | O08997 | 60  | TGK(*)AVSYLGPK(*)               | K3  | 95.37 | 172.06 | 0.8679245 | 0.948051 | 0.865168 | 0.893715  |
| Atox1  | O08997 | 3   | PK(*)HEFSVDMTC(+57.02)EGC(+57   | K2  | 91.8  | 1000   | 0.8396226 | 0.948051 | 0.943820 | 0.9104983 |
| Atox1  | O08997 | 57  | VC(+57.02)IDSEHSSDTLLATLNK(*)T  | K18 | 59.24 | 53.53  | -         | 0.870129 | 0.831460 | 0.8507953 |
| Ncoa3  | O09000 | 88  | EQGK(*)TISSDDDVQK(*)            | K4  | 64.62 | 185.36 | 0.6783625 | -        | -        |           |
| Ncoa3  | O09000 | 861 | AVSLDSPVSVGSGPPVK(*)NVSAFPGI    | K17 | 21.35 | 85.7   | -         | -        | -        |           |
| Psmb1  | O09061 | 76  | LTDK(*)TVIGC(+57.02)SGFHGDC(+5  | K4  | 53.31 | 103.39 | 1.0752688 | 0.610389 | 0.938144 | 0.8746009 |
| Map2k3 | O09110 | 183 | ALEHLHSK(*)LSVIHR(*)            | K8  | 75.8  | 1000   | 1.6103896 | 0.934210 | 1.048192 | 1.1975976 |
| Syp11  | O09117 | 57  | GK(*)TEIQVNC(+57.02)PK(*)       | K2  | 43.58 | 225.98 | 1.0416666 | -        | 0.922222 | 0.9819444 |
| Gsto1  | O09131 | 59  | NK(*)PEWFFEK(*)                 | K2  | 91.73 | 136.94 | 0.8125    | -        | 0.967032 | 0.8897665 |
| Gsto1  | O09131 | 57  | HEVININLK(*)NK(*)PEWFFEK(*)     | K9  | 77.41 | 22.85  | 0.6979166 | -        | 1.285714 | 0.9918155 |
| Gsto1  | O09131 | 219 | IDAK(*)TYR(*)                   | K4  | 75.19 | 1000   | 0.90625   | 0.886075 | 1.098901 | 0.9637423 |
| Gsto1  | O09131 | 122 | SK(*)VPPLIASFVR(*)              | K2  | 29.73 | 1000   | 0.8645833 | -        | -        |           |
| Rpl21  | O09167 | 97  | IEHIK(*)HSK(*)                  | K5  | 98.57 | 77.24  | -         | 0.845238 | 0.915789 | 0.8805138 |
| Rpl21  | O09167 | 60  | C(+57.02)YHGK(*)TGR(*)          | K5  | 90.29 | 1000   | -         | 0.904761 | 0.968421 | 0.9365915 |
| Rpl21  | O09167 | 43  | GDIVDIK(*)GMGTVQK(*)            | K7  | 80.43 | 184.45 | 0.9387755 | 0.714285 | 0.989473 | 0.880845  |
| Rpl21  | O09167 | 50  | GMGTVQK(*)GMPHK(*)              | K7  | 66.04 | 77.53  | -         | 0.869047 | 0.8      | 0.8345238 |
| Rpl21  | O09167 | 43  | K(*)GDIVDIK(*)GMGTVQK(*)        | K8  | 55.27 | 72.34  | 1.2857142 | 1.238095 | 1.178947 | 1.2342523 |
| Rpl21  | O09167 | 122 | EK(*)GTWVQLK(*)                 | K2  | 23.19 | 100.91 | 1.0306122 | 0.916666 | 1.073684 | 1.0069877 |
| Gclm   | O09172 | 255 | YSVIVK(*)SR(*)                  | K6  | 62.76 | 1000   | 0.9893617 | 0.7375   | 1.054347 | 0.9270698 |
| Gclm   | O09172 | 263 | SK(*)GYILQAK(*)                 | K2  | 28.17 | 127.53 | 1.1702127 | 0.6125   | -        | 0.8913564 |

|         |        |      |                                 |     |       |        |           |          |                     |
|---------|--------|------|---------------------------------|-----|-------|--------|-----------|----------|---------------------|
| Grcc10  | O35127 | 86   | LVK(*)SYEAQDPEIASLSGK(*)        | K3  | 48.94 | 199.78 | -         | -        | 0.431137725         |
| Phb2    | O35129 | 262  | AAQNISK(*)TIATSQNR(*)           | K7  | 42.82 | 1000   | 1.1649484 | 0.761904 | 1.0957441:1.0075326 |
| Phb2    | O35129 | 244  | MLGEALSK(*)NPGYIK(*)            | K8  | 34.94 | 47.38  | -         | 1.261904 | 0.7127651:0.9873354 |
| Emg1    | O35130 | 70   | HK(*)SMLLK(*)                   | K2  | 63.83 | 98.37  | 0.7349397 | -        | 1.0888881:0.9119143 |
| Emg1    | O35130 | 59   | VGK(*)TYELLNC(+57.02)DR(*)      | K3  | 60.48 | 1000   | 0.8554216 | 0.986666 | 0.9444444:0.9288443 |
| Polr1a  | O35134 | 1058 | SK(*)HLHEVLSR(*)                | K2  | 32.6  | 1000   | 1.0760869 | 0.943820 | 0.9148931:0.9782669 |
| ATP5IF1 | O35143 | 64   | TK(*)EQLAALR(*)                 | K2  | 51.99 | 1000   | -         | 0.673913 | 0.9587621:0.816338  |
| Slc30a4 | O35149 | 395  | AK(*)HLLLNTEFGMYK(*)            | K2  | 6.14  | 99.02  | -         | -        | 1.126506024         |
| Psm4    | O35226 | 40   | LQAQQDAVNIVC(+57.02)HSK(*)TR(   | K15 | 90.02 | 1000   | 0.9247311 | 0.810810 | 0.9673911:0.9009778 |
| Psm4    | O35226 | 74   | ILSK(*)LHTVQPK(*)               | K4  | 63.03 | 148.49 | 1.4516129 | 0.837837 | 0.9456521:1.0783676 |
| Psm4    | O35226 | 98   | VAHLALK(*)HR(*)                 | K7  | 58.49 | 1000   | 0.8924731 | -        | 10.9462366          |
| Psm4    | O35226 | 83   | GK(*)ITFC(+57.02)TGIR(*)        | K2  | 4.81  | 1000   | -         | -        | 3                   |
| Ptpn9   | O35239 | 218  | IQILK(*)TSEVTQHLPK(*)           | K5  | 11.17 | 1000   | -         | -        | 1.636363636         |
| Dhx15   | O35286 | 491  | AYK(*)TEMQDNTYPEILR(*)          | K3  | 71.89 | 1000   | 0.8020833 | 0.841463 | 10.8811822          |
| Dhx15   | O35286 | 744  | VLTTK(*)NYIR(*)                 | K5  | 58.32 | 1000   | 0.96875   | 0.939024 | 0.9270831:0.9449526 |
| Purb    | O35295 | 72   | FLK(*)IAEVGAGGSK(*)             | K3  | 22.05 | 85.84  | -         | -        | 1.082191781         |
| Srsf5   | O35326 | 25   | FFK(*)GYGR(*)                   | K3  | 51.66 | 1000   | 0.7472527 | 1.307692 | 1.0121951:1.0223801 |
| Capn1   | O35350 | 426  | ESGC(+57.02)SFLALMQK(*)HR(*)    | K13 | 38.5  | 1000   | -         | -        | 1.06741573          |
| Capn1   | O35350 | 266  | DLEAITFK(*)NLVR(*)              | K8  | 18.75 | 1000   | -         | -        | 1.370786517         |
| Abcc1   | O35379 | 397  | IK(*)TAVVGAVYR(*)               | K2  | 71.7  | 1000   | 0.6666666 | 0.607843 | 1.0941171:0.7895425 |
| Anp32a  | O35381 | 20   | TPSDVK(*)ELVLDNC(+57.02)K(*)    | K6  | 63.22 | 150.89 | 0.9905660 | 0.918918 | 1.1046511:1.004712  |
| Anp32a  | O35381 | 91   | C(+57.02)PNLK(*)HLNLSGNK(*)     | K5  | 29.48 | 150.63 | 1.5       | 0.918918 | 1.8488371:1.4225854 |
| Anp32a  | O35381 | 91   | LK(*)HLNLSGNK(*)                | K2  | 28.41 | 115.01 | 0.3490566 | -        | 0.5116271:0.4303423 |
| Hax1    | O35387 | 210  | SYFK(*)SISVTK(*)                | K4  | 16.42 | 79.01  | -         | -        | -                   |
| Crcp    | O35427 | 34   | NK(*)HSAGQQNLNAITYETLK(*)       | K2  | 55.65 | 137.15 | 0.9772727 | 0.972602 | 0.9767441:0.9755399 |
| Dhodh   | O35435 | 99   | NPVGIAAGFDK(*)HGEAVDGLYK(*)     | K11 | 27.94 | 21.3   | -         | -        | 1.181818182         |
| Dhodh   | O35435 | 226  | SLQGK(*)TELK(*)                 | K5  | 24.56 | 1000   | -         | -        | 0.886363636         |
| Dhodh   | O35435 | 185  | NK(*)TSVDAAADYVEGVR(*)          | K2  | 5.64  | 1000   | -         | -        | 1.238636364         |
| Psm4    | O35593 | 253  | EMLELAK(*)NYNK(*)               | K7  | 66.12 | 33.81  | 0.7765957 | 0.784810 | -0.7807029          |
| Psm4    | O35593 | 154  | GK(*)VVIDAFR(*)                 | K2  | 50.16 | 1000   | 0.7127659 | -        | 0.9120871:0.8124269 |
| Pmm1    | O35621 | 177  | TEFAGK(*)GLR(*)                 | K6  | 6.47  | 1000   | -         | -        | 1.238095238         |
| Bet1    | O35623 | 58   | SLSIEIGHEVK(*)NQNK(*)           | K11 | 55.93 | 38.26  | 1.0784313 | -        | 0.6640.8712157      |
| Stag2   | O35638 | 607  | LEK(*)HLDALLR(*)                | K3  | 68.41 | 1000   | 0.9545454 | 0.876543 | 0.9456521:0.9255803 |
| Stag2   | O35638 | 622  | NIVEK(*)HTDTDVLEAC(+57.02)SK(*) | K5  | 32.99 | 160.66 | -         | 1.222222 | 1.2717391:1.2469807 |



|         |        |     |                              |     |       |        |           |          |          |             |
|---------|--------|-----|------------------------------|-----|-------|--------|-----------|----------|----------|-------------|
| Anxa3   | O35639 | 263 | LHQALK(*)GAGTDEFTLNR(*)      | K6  | 56.02 | 1000   | 1.1530612 | 0.927710 | 1.712765 | 1.2645127   |
| Ap1b1   | O35643 | 318 | R(*)PEILK(*)HEMK(*)          | K6  | 55.69 | 82.24  | 0.8       | 0.876712 | 0.869565 | 0.8487592   |
| C1qbp   | O35658 | 171 | FVVEVK(*)TDGK(*)             | K7  | 43.77 | 28.7   | 0.9052631 | -        | 0.680851 | 0.7930571   |
| Nudc    | O35685 | 197 | GK(*)DVVVDIQR(*)             | K2  | 88.92 | 1000   | 1         | 1        | 1.011627 | 1.003876    |
| Nudc    | O35685 | 251 | INK(*)MEWWNR(*)              | K3  | 77.28 | 1000   | 0.9111111 | 1.025641 | 0.883720 | 0.9401577   |
| Nudc    | O35685 | 298 | QK(*)SMGLPTSDEQK(*)          | K2  | 45.62 | 170.43 | 0.8666666 | 0.794871 | 1.127906 | 0.9298151   |
| Nudc    | O35685 | 276 | INPENSK(*)LSDLDETR(*)        | K7  | 29.81 | 1000   | -         | -        | 1.139534 | 1.139534884 |
| Pnn     | O35691 | 20  | ESLK(*)NVDENIR(*)            | K4  | 23.72 | 1000   | 0.3693693 | 0.974683 | 1.876288 | 1.0734472   |
| Sptlc1  | O35704 | 210 | LFK(*)HNDVADLER(*)           | K3  | 24    | 1000   | 1.8181818 | 0.978260 | 0.75     | 1.1821476   |
| Hnrnph1 | O35737 | 185 | YIEIFK(*)SSR(*)              | K6  | 95.17 | 1000   | 1.0309278 | 0.987012 | 1.057471 | 1.0251374   |
| Hnrnph1 | O35737 | 98  | SNNVEMDWVLK(*)HTGPNSPD TAN   | K11 | 80.76 | 1000   | 0.5979381 | 0.909090 | 0.931034 | 0.8126878   |
| Api5    | O35841 | 398 | LALQGK(*)TGEALK(*)           | K6  | 82.47 | 132.53 | 0.7765957 | 0.7625   | 0.880434 | 0.8065102   |
| Api5    | O35841 | 202 | ILSGLK(*)SLQTVSGR(*)         | K6  | 68.35 | 1000   | 0.8297872 | -        | 1.054347 | 0.9420675   |
| Api5    | O35841 | 251 | QAVPLFSK(*)NVHSTR(*)         | K8  | 27.17 | 1000   | 1         | 0.975    | 0.858695 | 0.9445652   |
| Api5    | O35841 | 160 | LK(*)TLPDEVLTK(*)            | K2  | 9.59  | 75.99  | -         | 1.3      | -        | -           |
| Api5    | O35841 | 404 | TGEALK(*)TEENK(*)            | K6  | 3.7   | 71.64  | -         | -        | 1.206521 | 1.206521739 |
| Timm44  | O35857 | 138 | ESLDEVSK(*)SDLGR(*)          | K8  | 14.43 | 1000   | -         | 1.0375   | -        | -           |
| Cops5   | O35864 | 180 | TISAGK(*)VNLAGAFR(*)         | K6  | 42.24 | 1000   | 1.2234042 | 0.813333 | 0.935483 | 0.9907405   |
| Slc1a4  | O35874 | 31  | TPETAMGK(*)SQR(*)            | K8  | 11.42 | 1000   | 1.1978021 | -        | -        | -           |
| Calu    | O35887 | 287 | LTK(*)EEIVDK(*)              | K3  | 48.6  | 129.72 | 0.8387096 | 0.961538 | 0.867469 | 0.8892393   |
| Calu    | O35887 | 79  | IVSK(*)IDDDK(*)DGFVTVDELK(*) | K4  | 30.95 | 109.69 | 0.6666666 | 1.051282 | 1.096385 | 0.9381114   |
| Calu    | O35887 | 114 | QWK(*)GHDLNEDGLVSWEEYK(*)    | K3  | 25.97 | 144.89 | 0.8602150 | -        | 1.084337 | 0.9722762   |
| Lsm2    | O35900 | 58  | MLSVK(*)NC(+57.02)FIR(*)     | K5  | 78.4  | 1000   | 0.9397590 | 0.857142 | 1.032258 | 0.9430533   |
| Lsm2    | O35900 | 58  | YPHMLSVK(*)NC(+57.02)FIR(*)  | K8  | 67.11 | 1000   | 0.8795180 | 0.623376 | 0.956989 | 0.8199613   |
| Cavin1  | O54724 | 319 | TAVYK(*)VPPFTFHVK(*)         | K5  | 75.58 | 85.31  | 1.0681818 | -        | 0.811111 | 0.9396465   |
| Cavin1  | O54724 | 154 | NFK(*)VMIIYQDEVK(*)          | K3  | 57.79 | 145    | 1.1931818 | 0.961038 | 1.077777 | 1.0773329   |
| Cavin1  | O54724 | 124 | VSVNVK(*)TVR(*)              | K6  | 44.64 | 1000   | 1.1818181 | 0.870129 | 1.055555 | 1.0358345   |
| Cavin1  | O54724 | 124 | K(*)VSVNVK(*)TVR(*)          | K7  | 18.42 | 78.19  | 0.5909090 | -        | 0.944444 | 0.7676768   |
| Ddost   | O54734 | 174 | APTIVGK(*)SSLNPILFR(*)       | K7  | 72.54 | 1000   | 0.6344086 | -        | 0.758620 | 0.6965146   |
| Ap3d1   | O54774 | 580 | ASC(+57.02)ILQLVK(*)HVQK(*)  | K9  | 58.1  | 82.24  | 1.1034482 | 0.907894 | 1        | 1.003781    |
| Srpk2   | O54781 | 111 | VVK(*)SAQHYTETALDEIK(*)      | K3  | 32.15 | 130.55 | 1.2903225 | -        | 0.953703 | 1.1220131   |
| Bysl    | O54825 | 15  | EK(*)HAPLAEQILAGNAVR(*)      | K2  | 37.33 | 1000   | -         | -        | 0.655913 | 0.655913978 |
| Bysl    | O54825 | 389 | YK(*)ADLATEQK(*)             | K2  | 32.77 | 99.03  | -         | 1.171428 | 1.118279 | 1.1448541   |
| Csnk2a2 | O54833 | 151 | ALDYC(+57.02)HSK(*)GIMHR(*)  | K8  | 52.91 | 1000   | 0.7821782 | 0.962025 | 1.011363 | 0.9185224   |

|          |        |      |                                 |     |       |        |           |          |          |           |
|----------|--------|------|---------------------------------|-----|-------|--------|-----------|----------|----------|-----------|
| Hmgb3    | O54879 | 112  | IK(*)STNPGISIGDVAK(*)           | K2  | 65.85 | 208.61 | 1.0714285 | 1.481012 | 1.461538 | 1.3379932 |
| Reps1    | O54916 | 105  | FVASK(*)NEQESR(*)               | K5  | 13.59 | 1000   | -         | -        | 0.836538 | 0.462     |
| Dnajb6   | O54946 | 314  | LGSK(*)SNWEDDEQDR(*)            | K4  | 34.69 | 1000   | -         | -        | 0.794871 | 0.1795    |
| Prkag1   | O54950 | 99   | YYK(*)SALVQIYELEEhk(*)          | K3  | 48.96 | 206.61 | 1         | -        | -        | -         |
| Asna1    | O54984 | 50   | GGVGK(*)TTC(+57.02)SC(+57.02)SL | K5  | 61.73 | 244    | -         | 0.546666 | 1.045977 | 0.7963218 |
| Slk      | O54988 | 1017 | HLQEK(*)HQLLK(*)                | K5  | 77.73 | 115.97 | 0.85      | 0.641975 | 1.022222 | 0.8380658 |
| Slk      | O54988 | 179  | LADFGVSAK(*)NTR(*)              | K9  | 56.63 | 1000   | 1.06      | 0.901234 | 1.133333 | 1.0315226 |
| Slk      | O54988 | 1059 | LIEELK(*)NR(*)                  | K6  | 30.56 | 1000   | -         | 1.098765 | 1.022222 | 1.0604938 |
| Slk      | O54988 | 249  | IAK(*)SEPPTLAQPSK(*)            | K3  | 20.89 | 56.41  | -         | 1.382716 | 0.9      | 1.141358  |
| Impa1    | O55023 | 28   | EALK(*)NEMDVMIK(*)              | K4  | 12.92 | 100.36 | -         | -        | 1.521739 | 1.13      |
| Bckdk    | O55028 | 192  | YFLDK(*)TLTSR(*)                | K5  | 34.12 | 1000   | 0.3904109 | 0.439153 | -        | 0.4147822 |
| Copb2    | O55029 | 318  | IIWAK(*)HSEVQQANLK(*)           | K5  | 70.65 | 213.35 | 1.1052631 | 0.858974 | 1        | 0.9880792 |
| Copb2    | O55029 | 212  | LVK(*)IWDYQNK(*)                | K3  | 60.65 | 148.49 | 0.9368421 | 0.910256 | 0.952941 | 0.9333466 |
| Copb2    | O55029 | 386  | NK(*)SFGSAQEFWAHDSSEYAIR(*)     | K2  | 48.56 | 1000   | 1.0105263 | -        | 1.023529 | 1.0170279 |
| Impact   | O55091 | 278  | FK(*)HINNC(+57.02)AR(*)         | K2  | 8.79  | 1000   | -         | -        | 1.325581 | 0.1395    |
| Nipsnap2 | O55126 | 77   | LQFHNVK(*)PEC(+57.02)LDAYNK(*)  | K7  | 42.69 | 66.16  | -         | -        | 1.073394 | 0.495     |
| Sap18    | O55128 | 24   | EK(*)TC(+57.02)PLLLR(*)         | K2  | 24.55 | 1000   | 0.4271844 | -        | -        | -         |
| Septin7  | O55131 | 194  | IAK(*)ADTLTPEEC(+57.02)QQFK(*)  | K3  | 34.72 | 156.91 | -         | -        | 1.271739 | 1.13      |
| Septin7  | O55131 | 185  | LHEK(*)VNIIPLIK(*)              | K4  | 28.09 | 161.68 | -         | -        | 0.891304 | 0.348     |
| Septin7  | O55131 | 96   | TVQVEQSK(*)VLIK(*)              | K8  | 27.9  | 38.26  | -         | 1.204819 | 0.576086 | 0.8904531 |
| Rpl35a   | O55142 | 73   | VIWGGK(*)VTR(*)                 | K5  | 94.54 | 1000   | 0.7685185 | 0.691489 | 0.769911 | 0.7433065 |
| Rpl35a   | O55142 | 29   | EHTALLK(*)IEGVYAR(*)            | K7  | 93.54 | 1000   | 0.8611111 | 0.776595 | 0.601769 | 0.7464923 |
| Rpl35a   | O55142 | 45   | DETEFYLGK(*)R(*)                | K9  | 84.11 | 1000   | 0.9444444 | 0.531914 | 0.654867 | 0.7104089 |
| Rpl35a   | O55142 | 8    | LWC(+57.02)K(*)AIFAGYK(*)       | K4  | 80.16 | 122.76 | 0.7592592 | 0.702127 | 0.769911 | 0.7437661 |
| Rpl35a   | O55142 | 15   | AIFAGYK(*)R(*)                  | K7  | 50.46 | 1000   | 0.7222222 | 0.851063 | 0.787610 | 0.7869656 |
| Rpl35a   | O55142 | 54   | AK(*)NNTVTPGGK(*)               | K2  | 33.95 | 123.21 | -         | -        | 0.814159 | 0.292     |
| Atp2a2   | O55143 | 169  | LTSIK(*)STTLR(*)                | K5  | 68.46 | 1000   | 0.82      | 0.683544 | 0.815217 | 0.7729206 |
| Atp2a2   | O55143 | 189  | VDQSILTGESVSVIK(*)HTDPVPDPR(*)  | K15 | 55.96 | 1000   | 0.81      | -        | 0.586956 | 0.6984783 |
| Atp2a2   | O55143 | 533  | VGSTK(*)VPMTPGVK(*)             | K5  | 55.46 | 64     | 0.96      | 0.759493 | 1.010869 | 0.9101211 |
| Atp2a2   | O55143 | 514  | MFVK(*)GAPEGVIDR(*)             | K4  | 23.79 | 1000   | -         | 1.012658 | -        | -         |
| Ilk      | O55222 | 426  | LMK(*)IC(+57.02)MNEDPAK(*)      | K3  | 89.22 | 161.68 | 0.8709677 | 0.972602 | 0.988764 | 0.9441115 |
| Ilk      | O55222 | 184  | NGTLNK(*)HSGIDFK(*)             | K6  | 37.69 | 104.64 | 2.9139784 | -        | 0.674157 | 1.7940679 |
| Ilk      | O55222 | 209  | LNENHSGELWK(*)GR(*)             | K11 | 16.32 | 1000   | 1.8494623 | -        | -        | -         |
| Aurkb    | O70126 | 115  | ILFK(*)SQIEK(*)                 | K4  | 25.46 | 51.34  | 0.8333333 | -        | 1.177777 | 1.0055556 |

|         |        |      |                                    |     |       |        |           |          |                    |
|---------|--------|------|------------------------------------|-----|-------|--------|-----------|----------|--------------------|
| Aurkb   | O70126 | 314  | LLK(*)HNPWQR(*)                    | K3  | 23.31 | 1000   | -         | -        | 1.2                |
| Dhx9    | O70133 | 1026 | NALHK(*)SSVNC(+57.02)PFSSQDM       | K6  | 91.74 | 251.71 | 0.77      | 0.785714 | 0.927835(0.8278498 |
| Dhx9    | O70133 | 469  | GEEPGK(*)SC(+57.02)GYSVR(*)        | K6  | 40.3  | 1000   | 1.15      | -        | -                  |
| Dhx9    | O70133 | 757  | LFTAHNNMTNYATVWASK(*)TNLEQF        | K18 | 28.46 | 1000   | 0.36      | -        | 0.721649(0.5408247 |
| Dhx9    | O70133 | 757  | ATVWASK(*)TNLEQR(*)                | K7  | 16.67 | 1000   | 1.57      | 0.797619 | 1.412371(1.2599967 |
| Eif3d   | O70194 | 426  | GAVIATELK(*)NNSYK(*)               | K9  | 61.09 | 98.37  | 0.78      | 0.888888 | 0.712765(0.7938849 |
| Eif3d   | O70194 | 41   | LGK(*)VADWTGATYQDK(*)              | K3  | 49.82 | 264.82 | 0.8       | 0.444444 | 0.680851(0.6417652 |
| Eif3d   | O70194 | 90   | TQK(*)TAYQR(*)                     | K3  | 2.98  | 1000   | -         | -        | 1.734042553        |
| Znf143  | O70230 | 316  | TSGDLQK(*)HIR(*)                   | K7  | 30.7  | 1000   | -         | -        | -                  |
| Eef1b   | O70251 | 60   | WYNHIK(*)SYEK(*)                   | K6  | 84.26 | 97.69  | 0.9607843 | 1.025974 | 1.147727(1.0448285 |
| Eef1b   | O70251 | 139  | K(*)PAVVAK(*)SSILLDVK(*)PWDDEI     | K7  | 65.55 | 41.57  | -         | -        | 0.409090909        |
| Epb4112 | O70318 | 626  | AQEAILK(*)HQASISELK(*)             | K7  | 73.83 | 99.51  | 1.0449438 | -        | 0.919540(0.982242  |
| Epb4112 | O70318 | 479  | LWK(*)VC(+57.02)VEHHTFYR(*)        | K3  | 22.82 | 1000   | -         | -        | 1.264367816        |
| Epb4112 | O70318 | 626  | AQEAILK(*)HQASISELK(*)R(*)         | K7  | 14.91 | 54.49  | -         | -        | 1.574712644        |
| Epb4112 | O70318 | 151  | PALK(*)SSVETQPAEEVR(*)             | K4  | 7.05  | 1000   | 0.8539325 | -        | -                  |
| Pdlim1  | O70400 | 307  | GHFFVEDQIYC(+57.02)EK(*)HAR(*)     | K13 | 97.23 | 1000   | 1.0652173 | 1.052631 | 1.034090(1.0506466 |
| Pdlim1  | O70400 | 294  | QK(*)GHFFVEDQIYC(+57.02)EK(*)      | K2  | 74.98 | 187.28 | 0.9130434 | 0.973684 | 1.034090(0.9736062 |
| Pdlim1  | O70400 | 244  | APVTK(*)VAASVGNAQK(*)              | K5  | 65.42 | 219.4  | 0.8695652 | 0.736842 | 1.409090(1.0051661 |
| Pdlim1  | O70400 | 71   | IK(*)GC(+57.02)ADNMTLTVSR(*)       | K2  | 53.24 | 1000   | 0.6739130 | 0.710526 | 0.659090(0.6811768 |
| Vamp8   | O70404 | 47   | NK(*)TEDLEATSEHFK(*)               | K2  | 64.46 | 240.79 | 1.0101010 | 0.75     | 0.845454(0.8685185 |
| Fhl2    | O70433 | 183  | EQPWHK(*)EC(+57.02)FVC(+57.02)     | K6  | 71.74 | 159.26 | 0.7373737 | 0.670886 | 1.057471(0.8219104 |
| Fhl2    | O70433 | 118  | MEYK(*)GSSWHETC(+57.02)FTC(+57.02) | K4  | 45.56 | 1000   | -         | 0.683544 | -                  |
| Fhl2    | O70433 | 139  | C(+57.02)QQPIGTK(*)SFIPK(*)        | K8  | 19.14 | 51     | -         | 2.177215 | -                  |
| Psma3   | O70435 | 110  | SNFGYNIPLK(*)HLADR(*)              | K10 | 88.18 | 1000   | 1.12      | 0.987654 | 1.031914(1.0465231 |
| Psma3   | O70435 | 110  | NIPLK(*)HLADR(*)                   | K5  | 75.74 | 1000   | 1.16      | 1.049382 | 1.127659(1.1123474 |
| Psma3   | O70435 | 57   | LVLSK(*)LYEEGSNK(*)                | K5  | 57.04 | 88.19  | 0.9       | -        | 0.872340(0.8861702 |
| Ugdh    | O70475 | 100  | TYGMGK(*)GR(*)                     | K6  | 83.55 | 1000   | 0.9684210 | 1        | 0.988888(0.98577   |
| Ugdh    | O70475 | 67   | GK(*)NLFFSTNIDDAIR(*)              | K2  | 69.61 | 1000   | -         | -        | 0.877777778        |
| Ugdh    | O70475 | 434  | MLK(*)PAFIDGR(*)                   | K3  | 69.28 | 1000   | 0.8210526 | -        | 0.722222(0.7716374 |
| Ugdh    | O70475 | 370  | YLMDEGAHLHIYDPK(*)VPR(*)           | K15 | 26.64 | 1000   | 0.6842105 | -        | -                  |
| Ugdh    | O70475 | 129  | IVTEK(*)STVPVR(*)                  | K5  | 16.13 | 1000   | -         | -        | 0.422222222        |
| Ubr1    | O70481 | 1380 | TTC(+57.02)PQVLIHK(*)HLAR(*)       | K10 | 54.38 | 1000   | 0.2652173 | -        | 0.639455(0.4523366 |
| Snx3    | O70492 | 128  | K(*)QGLEQFINK(*)VAGHPLAQNER(*)     | K10 | 70.55 | 23.02  | -         | -        | 0.828571429        |
| Snx3    | O70492 | 54   | VK(*)TNLPIFK(*)                    | K2  | 54.2  | 170.44 | 0.8526315 | 0.864197 | 0.723809(0.8135462 |

|           |        |     |                                |     |       |        |           |          |                    |                    |
|-----------|--------|-----|--------------------------------|-----|-------|--------|-----------|----------|--------------------|--------------------|
| Snx3      | O70492 | 128 | QGLEQFINK(*)VAGHPLAQNER(*)     | K9  | 42.38 | 1000   | 1.2       | -        | 1.0666666666666667 | 1.1333333333333333 |
| Sp3       | O70494 | 636 | VYGK(*)TSHLR(*)                | K4  | 76.29 | 1000   | -         | 0.505154 | 0.770642           | 0.6378984          |
| Sp3       | O70494 | 700 | SDHLAK(*)HIK(*)                | K6  | 14.58 | 68.47  | 1.8208955 | -        | 0.871559           | 1.3462276          |
| Hsd17b12  | O70503 | 261 | SAIK(*)TVGLQTR(*)              | K4  | 26.65 | 1000   | -         | -        | 0.797468354        |                    |
| Hsd17b12  | O70503 | 167 | LININVL SVC(+57.02)K(*)VTR(*)  | K11 | 5.73  | 1000   | -         | -        | 1.64556962         |                    |
| Kdm6a     | O70546 | 799 | ANNNVGP GTC(+57.02)DK(*)VNNIH  | K12 | 71.93 | 49.96  | 1.4838709 | 0.792207 | 0.489898           | 0.9219926          |
| Srp k1    | O70551 | 112 | VVK(*)SAEHYTETALDEIR(*)        | K3  | 63.04 | 1000   | 0.7884615 | 1.561643 | 0.894736           | 1.0816141          |
| Srp k1    | O70551 | 499 | IADLGNAC(+57.02)WVHK(*)HFTED   | K12 | 45.05 | 1000   | 0.9230769 | 0.876712 | 1.147368           | 0.9823859          |
| Cfdp1     | O88271 | 163 | ITK(*)VDFDFAGEEVR(*)           | K3  | 63.12 | 1000   | 1.3673469 | 0.810526 | 1.306818           | 1.1615638          |
| Wdr1      | O88342 | 321 | GHSK(*)SIQC(+57.02)LTVHR(*)    | K4  | 81.54 | 1000   | 0.9489795 | 0.848101 | 0.914893           | 0.9039915          |
| Wdr1      | O88342 | 147 | NK(*)VINSVDIK(*)               | K2  | 79.74 | 171.6  | 0.9897959 | 0.860759 | 0.914893           | 0.9218163          |
| Wdr1      | O88342 | 569 | VK(*)IQDAHR(*)                 | K2  | 53.96 | 1000   | 0.9387755 | -        | -                  |                    |
| Wdr1      | O88342 | 182 | FK(*)FTIGDHSR(*)               | K2  | 39.14 | 1000   | 1.0408163 | -        | 1.276595           | 1.158706           |
| Wdr1      | O88342 | 38  | GDHFLYTNGK(*)C(+57.02)VILR(*)  | K10 | 36.12 | 1000   | -         | -        | 0.872340426        |                    |
| Wdr1      | O88342 | 106 | IK(*)DIAWTEDSK(*)              | K2  | 34.63 | 76.18  | -         | 0.797468 | -                  |                    |
| Wdr1      | O88342 | 95  | EHLLK(*)YEYQPFAGK(*)           | K5  | 34.43 | 100.79 | -         | -        | 0.468085106        |                    |
| Grpel2    | O88396 | 159 | SVFTK(*)HGLEK(*)               | K5  | 29.52 | 29.85  | -         | -        | 0.880597015        |                    |
| Klc1      | O88447 | 68  | K(*)DDESNLVEEK(*)SSMIR(*)      | K11 | 63.67 | 92.69  | -         | 0.763157 | 1                  | 0.8815789          |
| Klc1      | O88447 | 383 | TK(*)NNLASC(+57.02)YLK(*)      | K2  | 61.03 | 135.34 | -         | 0.539473 | 1.044943           | 0.7922088          |
| Klc1      | O88447 | 68  | DDESNLVEEK(*)SSMIR(*)          | K10 | 51.8  | 1000   | -         | -        | 0.93258427         |                    |
| Capns1    | O88456 | 136 | HPDLK(*)TDGFGIDTC(+57.02)R(*)  | K5  | 58.8  | 1000   | 1.0408163 | 1.025974 | 0.8                | 0.9555968          |
| Capns1    | O88456 | 180 | WQAIYK(*)R(*)                  | K6  | 13.48 | 1000   | -         | 0.948051 | -                  |                    |
| Igf2bp1   | O88477 | 228 | QTQSK(*)IDVHR(*)               | K5  | 28.19 | 1000   | -         | -        | 21.03529412        |                    |
| Zfr       | O88532 | 516 | LQSTGKN(*)TEDLK(*)             | K7  | 85.49 | 89.05  | 1.2619047 | 0.736842 | 1.011627           | 1.0034583          |
| Zfr       | O88532 | 509 | INFVGGNK(*)LQSTGKN(*)          | K8  | 67.77 | 118.11 | 1.4404761 | 0.763157 | 1.046511           | 1.0833819          |
| Zfr       | O88532 | 910 | HAK(*)WFQAR(*)                 | K3  | 52.6  | 1000   | 0.8928571 | -        | 0.918604           | 0.9057309          |
| Zfr       | O88532 | 730 | YVMTK(*)HATIYPTEELQAVQK(*)     | K5  | 44.82 | 212.46 | -         | -        | 0.941860465        |                    |
| Cops3     | O88543 | 281 | NLVSK(*)HSETFTR(*)             | K5  | 68.27 | 1000   | 0.9795918 | 0.938271 | 0.935483           | 0.9511158          |
| Cops3     | O88543 | 125 | GIGILK(*)QAIDK(*)              | K6  | 11.51 | 105.53 | 3.3469387 | -        | -                  |                    |
| Cops4     | O88544 | 227 | LEALK(*)HALHC(+57.02)TILASAGQC | K5  | 73.6  | 1000   | 0.9583333 | 0.870129 | 1.010989           | 0.9464841          |
| Cops4     | O88544 | 150 | LETYLK(*)IAR(*)                | K6  | 37.47 | 1000   | -         | -        | 1.021978022        |                    |
| Cops4     | O88544 | 214 | YNELSYK(*)TIVHESER(*)          | K7  | 29.57 | 1000   | -         | 1.519480 | 0.758241           | 1.1388611          |
| Cops6     | O88545 | 105 | EYYTYK(*)EEQFK(*)              | K6  | 40.01 | 61.3   | -         | -        | 0.950980392        |                    |
| Hnrnpa2b1 | O88569 | 104 | EESGK(*)PGAHVTVK(*)            | K5  | 34.31 | 113.97 | -         | -        | 0.862068966        |                    |

|        |        |      |                                     |     |       |        |           |          |             |           |
|--------|--------|------|-------------------------------------|-----|-------|--------|-----------|----------|-------------|-----------|
| Pak1   | O88643 | 114  | LLQTSNITK(*)SEQK(*)                 | K9  | 38.46 | 22.37  | -         | 1.256097 | 0.715789    | 0.9859435 |
| Pak1   | O88643 | 391  | DIK(*)SDNILLGMDGSVK(*)              | K3  | 4.7   | 84.54  | -         | -        | 4.726315789 |           |
| Psmc3  | O88685 | 248  | AC(+57.02)AAQTK(*)ATFLK(*)          | K7  | 78.77 | 107.29 | 0.7551020 | 0.829268 | 0.586956    | 0.7237756 |
| Psmc3  | O88685 | 236  | GVLMYGPPTGK(*)TLLAR(*)              | K12 | 77.53 | 1000   | 0.6734693 | 0.682926 | 1.076086    | 0.8108277 |
| Psmc3  | O88685 | 59   | IMK(*)SEVLR(*)                      | K3  | 66.35 | 1000   | 0.8265306 | 1.256097 | 1.152173    | 1.0782674 |
| Psmc3  | O88685 | 149  | LK(*)PGDLVGVNK(*)                   | K2  | 55.44 | 85.31  | -         | -        | 0.77173913  |           |
| Clpp   | O88696 | 210  | HTK(*)QSLQVIESAMER(*)               | K3  | 15.57 | 1000   | -         | 1.350649 | -           |           |
| Orc4   | O88708 | 7    | TK(*)SNAHAEC(+57.02)LSQVQR(*)       | K2  | 26.81 | 1000   | 3.3958333 | -        | -           |           |
| Ctbp1  | O88712 | 348  | IPDSLK(*)NC(+57.02)VNK(*)           | K6  | 72.9  | 81.69  | 0.9032258 | 0.717948 | 0.913978    | 0.845051  |
| Birc6  | O88738 | 4044 | VITDPSLSK(*)TDSFK(*)                | K9  | 16.4  | 26.93  | -         | 0.876543 | -           |           |
| Tom1   | O88746 | 106  | TILPK(*)NNPPTIVHDK(*)               | K5  | 3.96  | 25.89  | -         | -        | 1.138297872 |           |
| Sc5d   | O88822 | 70   | HPQFLK(*)NQVSR(*)                   | K6  | 20.82 | 1000   | -         | -        | -           |           |
| Idh1   | O88844 | 115  | EAIIC(+57.02)K(*)NIPR(*)            | K6  | 87.99 | 1000   | 0.7978723 | 0.675    | 0.966666    | 0.8131797 |
| Idh1   | O88844 | 203  | SK(*)GWPLYLSTK(*)                   | K2  | 74.32 | 140.79 | 0.6382978 | 0.4375   | 0.744444    | 0.6067474 |
| Idh1   | O88844 | 212  | GWPLYLSTK(*)NTILK(*)                | K9  | 54.11 | 43.82  | 0.9042553 | 1.6375   | 1.088888    | 1.2102147 |
| Idh1   | O88844 | 224  | FK(*)DIFQEYDK(*)                    | K2  | 45.45 | 189.7  | 1.0638297 | 1.075    | -           | 1.0694149 |
| Arl6   | O88848 | 119  | EELDTLLNHPDIK(*)HR(*)               | K13 | 49.64 | 1000   | 1.6567164 | 0.602040 | 0.96875     | 1.0758357 |
| Zfand5 | O88878 | 183  | YSDK(*)HNC(+57.02)PYDYK(*)          | K4  | 20.67 | 81.34  | -         | -        | 1.644736842 |           |
| Apaf1  | O88879 | 637  | IASC(+57.02)GADK(*)TLQVFK(*)        | K8  | 26.44 | 25.65  | -         | -        | 0.675       |           |
| Yme1l1 | O88967 | 327  | GILLVGPPGTGK(*)TLLAR(*)             | K12 | 40.53 | 1000   | -         | -        | 0.686868687 |           |
| Cpd    | O89001 | 530  | LYSLGK(*)SVESR(*)                   | K6  | 28.29 | 1000   | 0.4545454 | 2.909090 | -           | 1.6818182 |
| Lgmn   | O89017 | 289  | VMQFQGMK(*)HR(*)                    | K8  | 25.67 | 1000   | 1.1022727 | -        | 0.581395    | 0.841834  |
| Mkl1n1 | O89050 | 182  | LC(+57.02)LK(*)HFR(*)               | K4  | 9.18  | 1000   | -         | 0.929411 | -           |           |
| Casp8  | O89110 | 309  | NK(*)DC(+57.02)FIC(+57.02)C(+57.02) | K2  | 47.85 | 121.36 | 1.0769230 | -        | 0.853932    | 0.9654278 |
| Vti1a  | O89116 | 176  | DADANLGK(*)SSR(*)                   | K8  | 15.08 | 1000   | 0.9236641 | -        | 1.164948    | 1.0443063 |
| Dhfr   | P00375 | 92   | GAHFLAK(*)SLDDALR(*)                | K7  | 84.73 | 1000   | 1.3222222 | 1.197368 | 1.043956    | 1.1878489 |
| Dhfr   | P00375 | 92   | FLAK(*)SLDDALR(*)                   | K4  | 42.05 | 1000   | -         | -        | 0.901098901 |           |
| Hprt1  | P00493 | 103  | LK(*)SYC(+57.02)NDQSTGDIK(*)        | K2  | 56.1  | 240.84 | 1.1619047 | 1.142857 | 1.340425    | 1.2150625 |
| Mtstp6 | P00848 | 64   | QMMLIHTPK(*)GR(*)                   | K9  | 52.74 | 1000   | 1.1666666 | 0.769230 | 1.141304    | 1.0257339 |
| B2m    | P01887 | 103  | VK(*)HASMAEPK(*)                    | K2  | 19.43 | 171.6  | 0.8207547 | -        | 0.946808    | 0.8837816 |
| Hba    | P01942 | 17   | AAWGK(*)IGGHGAEGAEALER(*)           | K5  | 21.01 | 1000   | 1         | 0.416666 | 0.375       | 0.5972222 |
| Lamc1  | P02468 | 306  | LMC(+57.02)NC(+57.02)K(*)HNTYC      | K6  | 38.68 | 58.64  | 0.9137931 | -        | 1.054945    | 0.9843691 |
| Lamb1  | P02469 | 1736 | SK(*)LQLLEDLER(*)                   | K2  | 49.81 | 1000   | -         | -        | 0.77173913  |           |
| Lamb1  | P02469 | 1708 | VESLIAQK(*)TEESADAR(*)              | K8  | 36.75 | 1000   | 1.1368421 | -        | 0.771739    | 0.9542906 |

|        |        |     |                                |     |       |        |           |          |                    |
|--------|--------|-----|--------------------------------|-----|-------|--------|-----------|----------|--------------------|
| Lamb1  | P02469 | 158 | SSDFGK(*)AWGVYR(*)             | K6  | 9.65  | 1000   | -         | -        | 1.130434783        |
| Mtstp8 | P03930 | 48  | VK(*)TPWELK(*)                 | K2  | 31.49 | 95.35  | -         | -        | -                  |
| Mtstp8 | P03930 | 54  | TPWELK(*)WTK(*)                | K6  | 23.75 | 26.52  | -         | -        | -                  |
| Aldoa  | P05064 | 147 | DGADFAK(*)WR(*)                | K7  | 87.8  | 1000   | -         | 0.786666 | 0.988636:0.8876515 |
| Aldoa  | P05064 | 108 | GGVVGIK(*)VDK(*)               | K7  | 76.97 | 53.53  | 0.9468085 | 0.72     | 1.011363:0.892724  |
| Aldoa  | P05064 | 101 | SK(*)GGVVGIK(*)                | K2  | 71.53 | 122.76 | 0.9468085 | 0.92     | 0.954545:0.9404513 |
| Aldoa  | P05064 | 230 | ALSDHHVYLEGTLLK(*)PNM(+15.99   | K15 | 54.06 | 49.75  | 0.3617021 | -        | 0.965909:0.6638056 |
| Aldoa  | P05064 | 294 | LK(*)PWALTFYGR(*)              | K2  | 45.7  | 1000   | -         | -        | 0.977272727        |
| Aldoa  | P05064 | 153 | C(+57.02)VLK(*)IGEHTPSALAIMENA | K4  | 21.33 | 1000   | -         | -        | 0.920454545        |
| Prkaca | P05132 | 48  | IK(*)TLGTGSFGR(*)              | K2  | 79.33 | 1000   | 0.8404255 | -        | 0.913043:0.8767345 |
| Prkaca | P05132 | 62  | VMLVK(*)HK(*)                  | K5  | 63.93 | 24.32  | 1.3085106 | 0.636363 | 0.902173:0.9490161 |
| Prkaca | P05132 | 24  | AK(*)EDFLK(*)                  | K2  | 53.06 | 142.99 | -         | 0.519480 | 0.902173:0.7108272 |
| Prkaca | P05132 | 286 | FGNLK(*)NGVNDIK(*)             | K5  | 17.36 | 110.43 | -         | -        | 1.434782609        |
| Got1   | P05201 | 259 | SK(*)NFGLYNER(*)               | K2  | 74.48 | 1000   | -         | 0.794871 | -                  |
| Got1   | P05201 | 396 | INMC(+57.02)GLTTK(*)NLDYVATSIH | K9  | 69.59 | 60.3   | -         | -        | 1.068181818        |
| Got1   | P05201 | 378 | QVEYLVNEK(*)HIYLLPSGR(*)       | K9  | 49.09 | 1000   | -         | 1.410256 | 0.897727:1.1539918 |
| Got1   | P05201 | 325 | GNVK(*)TMADR(*)                | K4  | 16.1  | 1000   | -         | -        | 1.409090909        |
| Got2   | P05202 | 122 | ASAEALALGENNEVLK(*)SGR(*)      | K15 | 86.68 | 1000   | 0.8163265 | 0.621951 | 0.933333:0.790537  |
| Got2   | P05202 | 90  | AEAQIAAK(*)NLDK(*)             | K8  | 70.11 | 38.26  | -         | 0.487804 | 0.711111:0.599458  |
| Got2   | P05202 | 159 | DVFLPK(*)PSWGNHTPIFR(*)        | K6  | 45.93 | 1000   | 0.8469387 | 0.902439 | 0.908831259        |
| Got2   | P05202 | 279 | AK(*)NMGLYGER(*)               | K2  | 45.13 | 1000   | 0.8367346 | 0.792682 | 1.455555:1.0283244 |
| Got2   | P05202 | 345 | QWLQEVK(*)GMADR(*)             | K7  | 44.83 | 1000   | 0.9387755 | 0.463414 | 0.666666:0.6896189 |
| Got2   | P05202 | 90  | K(*)AEAQIAAK(*)NLDK(*)         | K9  | 40.16 | 29.57  | 0.5510204 | 0.817073 | 0.433333:0.6004756 |
| Got2   | P05202 | 345 | K(*)QWLQEVK(*)GMADR(*)         | K8  | 38.26 | 104.64 | 0.9693877 | -        | 0.844444:0.9069161 |
| Got2   | P05202 | 309 | VESQLK(*)ILIR(*)               | K6  | 36.76 | 1000   | 0.5510204 | -        | 0.666666:0.6088435 |
| Got2   | P05202 | 387 | C(+57.02)FTGLK(*)PEQVER(*)     | K6  | 7.04  | 1000   | -         | -        | 1.477777778        |
| Src    | P05480 | 208 | GLNVK(*)HYK(*)                 | K5  | 41.04 | 68.47  | 0.8421052 | 0.987179 | 0.885057:0.9047807 |
| Pdgfrb | P05622 | 190 | TYIC(+57.02)K(*)TTIGDR(*)      | K5  | 37.7  | 1000   | -         | -        | 1.304878049        |
| Pdgfrb | P05622 | 696 | NK(*)HTFLQR(*)                 | K2  | 27.94 | 1000   | 1.0125    | -        | -                  |
| Pdgfrb | P05622 | 840 | LVK(*)IC(+57.02)DFGLAR(*)      | K3  | 26.64 | 1000   | -         | -        | 0.914634146        |
| Jun    | P05627 | 56  | AK(*)NSDLLTSPDVGLLK(*)         | K2  | 38.23 | 227.68 | -         | -        | 2.555555556        |
| Ldha   | P06151 | 155 | ISGFPK(*)NR(*)                 | K6  | 99.12 | 1000   | 0.8829787 | 0.822784 | 0.944444:0.8834027 |
| Ldha   | P06151 | 59  | LK(*)GEMMDLQHGSFLK(*)          | K2  | 84.42 | 243.73 | 0.9893617 | 0.898734 | 0.988888:0.9589949 |
| Ldha   | P06151 | 90  | SK(*)LVIITAGAR(*)              | K2  | 84.2  | 1000   | 0.8510638 | 0.860759 | 0.911111:0.8743115 |



|        |        |     |                                 |     |       |        |           |          |           |           |
|--------|--------|-----|---------------------------------|-----|-------|--------|-----------|----------|-----------|-----------|
| Ldha   | P06151 | 232 | EVHK(*)QVVDSAYEVIK(*)           | K4  | 82.12 | 215.31 | 1.0851063 | 0.759493 | 0.9666666 | 0.9370889 |
| Ldha   | P06151 | 73  | GEMMDLQHGSFLK(*)TPK(*)          | K14 | 77.22 | 32.97  | 0.9787234 | 0.721518 | 0.9777777 | 0.8926734 |
| Ldha   | P06151 | 149 | VAWK(*)ISGFPK(*)                | K4  | 41.98 | 90.32  | 0.8723404 | 0.924050 | 0.8888888 | 0.8950933 |
| Gpi    | P06745 | 142 | SGDWK(*)GYTGK(*)                | K5  | 85.97 | 95.62  | 1         | 0.987654 | 0.901098  | 0.9629177 |
| Gpi    | P06745 | 57  | ILVDYSK(*)NLVNK(*)              | K7  | 78.15 | 100.21 | 1.0425531 | -        | 0.857142  | 0.949848  |
| Gpi    | P06745 | 130 | MK(*)SFC(+57.02)QR(*)           | K2  | 68.77 | 1000   | 0.8936170 | 0.654320 | 0.945054  | 0.8309977 |
| Gpi    | P06745 | 89  | DNMFSGSK(*)INYTENR(*)           | K8  | 68.15 | 1000   | 0.8829787 | 0.876543 | 1.340659  | 1.0333938 |
| Gpi    | P06745 | 241 | DPSAVAK(*)HFVALSTNTAK(*)        | K7  | 61.16 | 139.71 | 0.8829787 | 0.691358 | 0.901098  | 0.8251452 |
| Gpi    | P06745 | 73  | EVMQMLVELAK(*)SR(*)             | K11 | 53.83 | 1000   | 0.8723404 | -        | 1.043956  | 0.9581482 |
| Gpi    | P06745 | 241 | SAVAK(*)HFVALSTNTAK(*)          | K5  | 44.89 | 176.98 | 0.6702127 | 0.592592 | 1.087912  | 0.7835725 |
| Gpi    | P06745 | 423 | GLHHK(*)ILLANFLAQTEALMK(*)      | K5  | 37.68 | 278.79 | -         | -        | 0.8791208 | 0.79      |
| Ctsl   | P06797 | 54  | AIWEK(*)NMR(*)                  | K5  | 57.1  | 1000   | -         | -        | 1.451612  | 0.903     |
| Ctsl   | P06797 | 116 | IPK(*)SVDWR(*)                  | K3  | 53.22 | 1000   | 0.6944444 | -        | -         | -         |
| Ctsl   | P06797 | 33  | FDQTFAEWHQWK(*)STHR(*)          | K13 | 49.51 | 1000   | 0.8796296 | -        | 1.075268  | 0.9774492 |
| Ctsl   | P06797 | 154 | SASGC(+57.02)LEGQMFLK(*)TGK(*)  | K13 | 48.66 | 32.97  | -         | -        | 0.9892473 | 0.12      |
| Me1    | P06801 | 60  | IHK(*)NFER(*)                   | K3  | 56.97 | 1000   | -         | 1.085365 | 0.869565  | 0.9774655 |
| Me1    | P06801 | 362 | EVFAHEHEEMK(*)NLEAIVQK(*)       | K11 | 51.57 | 139.69 | 0.9306930 | -        | 0.978260  | 0.954477  |
| Me1    | P06801 | 337 | IWLVDISK(*)GLIVK(*)             | K7  | 46.24 | 94.22  | 0.9900990 | -        | 0.847826  | 0.9189625 |
| Me1    | P06801 | 422 | AEC(+57.02)SAEQC(+57.02)YK(*)VT | K10 | 39.09 | 44.44  | -         | 1.207317 | 0.858695  | 1.0330064 |
| S100a4 | P07091 | 48  | ELPSFLGK(*)R(*)                 | K8  | 73.46 | 1000   | -         | 0.759493 | 0.919540  | 0.839517  |
| S100a4 | P07091 | 35  | LNK(*)TELK(*)ELLTR(*)           | K7  | 34.99 | 1000   | 1.1195652 | 0.683544 | 1.080459  | 0.9611898 |
| S100a4 | P07091 | 31  | LNK(*)TELK(*)ELLTR(*)           | K3  | 34.99 | 1000   | 1.1195652 | 0.683544 | 1.080459  | 0.9611898 |
| Sparc  | P07214 | 128 | TFDSSC(+57.02)HFFATK(*)C(+57.02 | K12 | 43.69 | 50.34  | 1.0752688 | -        | 0.831460  | 0.9533647 |
| Ttr    | P07309 | 96  | VELDTK(*)SYWK(*)                | K6  | 11.82 | 77.13  | -         | -        | -         | -         |
| Ttr    | P07309 | 35  | C(+57.02)PLMVK(*)VLDAVR(*)      | K6  | 2.24  | 1000   | -         | -        | -         | -         |
| Anxa2  | P07356 | 233 | YK(*)SYSPYDMLESIK(*)            | K2  | 93.65 | 307.89 | 0.8969072 | 0.822784 | 0.820224  | 0.8466389 |
| Anxa2  | P07356 | 313 | YGK(*)SLYYYIQQDTK(*)            | K3  | 90.08 | 267.5  | 0.9278350 | 0.974683 | 1.011235  | 0.9712515 |
| Anxa2  | P07356 | 47  | DALNIETAVK(*)TK(*)              | K10 | 76.03 | 28.86  | 0.8247422 | 0.822784 | 0.910112  | 0.8525465 |
| Anxa2  | P07356 | 152 | EMYK(*)TDLEK(*)                 | K4  | 74.24 | 87.95  | 0.9278350 | 0.632911 | 0.876404  | 0.8123836 |
| Anxa2  | P07356 | 176 | LMVALAK(*)GR(*)                 | K7  | 71.72 | 1000   | 0.7938144 | 0.898734 | 0.955056  | 0.8825349 |
| Anxa2  | P07356 | 227 | SVC(+57.02)HLQK(*)VFER(*)       | K7  | 71.3  | 1000   | 0.9072164 | 0.810126 | 0.977528  | 0.8982904 |
| Anxa2  | P07356 | 302 | SEVDMLK(*)IR(*)                 | K7  | 56.3  | 1000   | 0.9278350 | 0.822784 | -         | 0.8753099 |
| Anxa2  | P07356 | 49  | TK(*)GVDEVTIVNILTNR(*)          | K2  | 28.94 | 1000   | 0.8762886 | -        | 0.808988  | 0.8426387 |
| Anxa2  | P07356 | 324 | SLYYYIQQDTK(*)GDYQK(*)          | K11 | 26.16 | 47.64  | 1.5051546 | -        | 0.808988  | 1.1570717 |

|          |        |     |                                |     |       |        |           |          |                    |
|----------|--------|-----|--------------------------------|-----|-------|--------|-----------|----------|--------------------|
| Anxa2    | P07356 | 266 | NK(*)PLYFADR(*)                | K2  | 24.05 | 1000   | -         | -        | 1.247191011        |
| Anxa2    | P07356 | 152 | EMYK(*)TDLEK(*)DIISDTSGDFR(*)  | K4  | 20.51 | 30.64  | -         | -        | 1.033707865        |
| Anxa2    | P07356 | 28  | LSLEGDHSTPPSAYGSVK(*)PYTNFDA   | K18 | 9.95  | 1000   | -         | -        | 1.314606742        |
| Rrm1     | P07742 | 17  | VMFDK(*)ITSR(*)                | K5  | 66.76 | 1000   | 0.7765957 | 0.658227 | 0.94186040.792228  |
| Rrm1     | P07742 | 733 | QGLK(*)TGMYYLR(*)              | K4  | 43.72 | 1000   | 1.2978723 | 1.848101 | 1.31395341.4866424 |
| Rrm1     | P07742 | 149 | DFSYNFYFGFK(*)TLER(*)          | K10 | 40.22 | 1000   | -         | -        | 1.255813953        |
| Rrm1     | P07742 | 243 | QC(+57.02)ALISK(*)SAGGIGVAVSC( | K7  | 13.86 | 1000   | -         | -        | 1.395348837        |
| Hsp90aa1 | P07901 | 41  | NK(*)EIFLR(*)                  | K2  | 98.48 | 1000   | 0.9578947 | 0.910256 | 0.9550560.9410691  |
| Hsp90aa1 | P07901 | 540 | EFEGK(*)TLVSVTK(*)             | K5  | 96.14 | 147.63 | 0.9263157 | 0.846153 | 0.9438200.90543    |
| Hsp90aa1 | P07901 | 293 | YIDQEELNK(*)TK(*)              | K9  | 92.63 | 36.05  | 0.8105263 | 0.820512 | 0.9550560.8620318  |
| Hsp90aa1 | P07901 | 112 | ADLINNLGTIAK(*)SGTK(*)         | K12 | 89.97 | 63.97  | 0.8736842 | 0.820512 | 0.977528(0.890575  |
| Hsp90aa1 | P07901 | 444 | FYEQFSK(*)NIK(*)               | K7  | 88.99 | 37.54  | 0.9263157 | 0.910256 | 0.88764040.9080709 |
| Hsp90aa1 | P07901 | 490 | ENQK(*)HIYFITGETK(*)           | K4  | 88    | 116.87 | 0.9052631 | 0.807692 | 10.9043185         |
| Hsp90aa1 | P07901 | 408 | EMLQQSK(*)ILK(*)               | K7  | 87.19 | 50.22  | 0.9894736 | 0.820512 | 0.9213480.9104449  |
| Hsp90aa1 | P07901 | 185 | GTK(*)VILHLK(*)                | K3  | 83.89 | 156.85 | 0.8947368 | 0.833333 | 1.988764(1.2389447 |
| Hsp90aa1 | P07901 | 568 | TK(*)FENLC(+57.02)K(*)         | K2  | 81.99 | 156.85 | 1.2210526 | 1.076923 | 1.0337071.1105612  |
| Hsp90aa1 | P07901 | 100 | TK(*)ADLINNLGTIAK(*)           | K2  | 81.74 | 285.65 | 0.8315789 | 0.974358 | 0.9325840.9128407  |
| Hsp90aa1 | P07901 | 295 | TK(*)PIWTR(*)                  | K2  | 81.7  | 1000   | 0.8315789 | 0.833333 | 0.9325840.8658322  |
| Hsp90aa1 | P07901 | 84  | ELHINLIPSK(*)QDR(*)            | K10 | 78.8  | 1000   | 0.8947368 | 0.858974 | 0.89887640.8841959 |
| Hsp90aa1 | P07901 | 500 | HIYFITGETK(*)DQVANSAFVER(*)    | K10 | 69.48 | 1000   | 1.2947368 | -        | 1.0224710.11586044 |
| Hsp90aa1 | P07901 | 284 | EK(*)YIDQEELNK(*)              | K2  | 66.78 | 148.12 | -         | 1.128205 | 1.0112350.10697205 |
| Hsp90aa1 | P07901 | 153 | VTVITK(*)HNDDEQYAWESSAGGSFT    | K6  | 66.22 | 1000   | 0.6210526 | -        | 1.1797750.900414   |
| Hsp90aa1 | P07901 | 490 | MK(*)ENQK(*)HIYFITGETK(*)      | K6  | 66.21 | 52.86  | 1.4842105 | 0.782051 | 1.4157300.12273307 |
| Hsp90aa1 | P07901 | 69  | YESLTDPSK(*)LDSGK(*)           | K9  | 57.89 | 32.32  | 1.0631578 | 0.679487 | 1.0561790.9329416  |
| Hsp90aa1 | P07901 | 191 | VILHLK(*)EDQTEYLEER(*)         | K6  | 46.23 | 1000   | -         | 2.038461 | 0.977528(1.5079948 |
| Hsp90aa1 | P07901 | 293 | YIDQEELNK(*)TK(*)PIWTR(*)      | K9  | 45.89 | 22.85  | 0.7473684 | 0.794871 | 0.6853930.7425445  |
| Hsp90aa1 | P07901 | 191 | LK(*)EDQTEYLEER(*)             | K2  | 41.83 | 1000   | 1.0526315 | 1.012820 | 1.6516850.12390458 |
| Pdia4    | P08003 | 526 | VVVGK(*)TFDAIVMDPK(*)          | K5  | 92.77 | 228.69 | 0.8247422 | 0.740740 | 0.9569890.8408241  |
| Pdia4    | P08003 | 430 | NK(*)VLEVAK(*)                 | K2  | 73.56 | 129.19 | 0.9381443 | 0.962962 | 0.9892470.9634515  |
| Pdia4    | P08003 | 249 | FDVSGYPTLK(*)IFR(*)            | K10 | 70.8  | 1000   | 0.9072164 | 0.740740 | 0.9032250.8503943  |
| Pdia4    | P08003 | 384 | DYVVK(*)HALPLVGHR(*)           | K5  | 60.23 | 1000   | 0.9381443 | 0.777777 | 0.9569890.8909705  |
| Pdia4    | P08003 | 342 | FLK(*)VSLGK(*)                 | K3  | 59.56 | 76.42  | 0.8762886 | -        | 1.1182790.9972841  |
| Pdia4    | P08003 | 227 | AK(*)VDATEQTDLAK(*)            | K2  | 43.52 | 219.15 | 1.1855670 | -        | 1.1075260.11465469 |
| Pdia4    | P08003 | 156 | TQEEIVAK(*)VR(*)               | K8  | 27.17 | 1000   | 1.0824742 | 0.728395 | 0.8924730.9011141  |

|         |        |      |                               |     |       |        |           |          |          |           |
|---------|--------|------|-------------------------------|-----|-------|--------|-----------|----------|----------|-----------|
| Pdia4   | P08003 | 249  | R(*)FDVSGYPTLK(*)IFR(*)       | K11 | 13.19 | 1000   | 0.8350515 | -        | 0.881720 | 0.858386  |
| Pdia4   | P08003 | 508  | LK(*)PVIK(*)SQPVPK(*)         | K6  | 10.36 | 28.13  | -         | -        | 1.096774 | 1.194     |
| Aprt    | P08030 | 51   | LLASHLK(*)STHSGK(*)           | K7  | 83.18 | 123.86 | 1.0096153 | 0.815217 | 0.956989 | 0.927274  |
| Aprt    | P08030 | 57   | STHSGK(*)IDYIAGLDSR(*)        | K6  | 71.44 | 1000   | 0.9903846 | 0.836956 | 1.086021 | 0.9711209 |
| Hsp90b1 | P08113 | 95   | LIINSLYK(*)NK(*)              | K8  | 98.21 | 28.86  | 0.9183673 | 0.9125   | 0.904255 | 0.9117076 |
| Hsp90b1 | P08113 | 168  | NLGTIAK(*)SGTSEFLNK(*)        | K7  | 97.81 | 202.16 | 0.8673469 | 0.8125   | 0.882978 | 0.8542752 |
| Hsp90b1 | P08113 | 161  | EELVK(*)NLGTIAK(*)            | K5  | 97.23 | 136.94 | 0.8571428 | 0.8125   | 0.936170 | 0.8686044 |
| Hsp90b1 | P08113 | 142  | EK(*)NLLHVTDTGVGMTR(*)        | K2  | 93.83 | 1000   | 0.7857142 | 0.95     | 0.957446 | 0.8977204 |
| Hsp90b1 | P08113 | 356  | EVEEDEYK(*)AFYK(*)            | K8  | 88.45 | 77.13  | 1         | 0.875    | 0.946808 | 0.9406028 |
| Hsp90b1 | P08113 | 455  | ETLQQHK(*)LLK(*)              | K7  | 88.28 | 62.26  | 0.9285714 | 0.875    | 0.957446 | 0.9203394 |
| Hsp90b1 | P08113 | 214  | VIVTSK(*)HNNDTQHIWESDSNEFSVI  | K6  | 64.13 | 1000   | 1.0918367 | -        | 1.042553 | 1.067195  |
| Hsp90b1 | P08113 | 671  | AQAYQTGK(*)DISTNYYASQK(*)     | K8  | 35.17 | 134.4  | -         | -        | 0.787234 | 0.4043    |
| Hsp90b1 | P08113 | 733  | SGYLLPDTK(*)AYGDR(*)          | K9  | 32.07 | 1000   | 0.9489795 | 1.05     | 0.765957 | 0.9216457 |
| Hsp90b1 | P08113 | 360  | AFYK(*)SFSK(*)                | K4  | 13.42 | 49.79  | -         | -        | 1.148936 | 1.17      |
| Col3a1  | P08121 | 1424 | HTGEWSK(*)TVFEYQTR(*)         | K7  | 35.86 | 1000   | -         | -        | 0.837606 | 0.838     |
| S100a10 | P08207 | 28   | FAGDK(*)DHCLK(*)EDLR(*)       | K10 | 71.13 | 115.97 | 0.8834951 | 0.956521 | 1.043956 | 0.9613243 |
| Mdh2    | P08249 | 301  | GLEK(*)NLGIGK(*)              | K4  | 94.11 | 151.71 | 0.9021739 | 0.839506 | 0.849462 | 0.8637142 |
| Mdh2    | P08249 | 335  | K(*)GEDFVK(*)NMG(*)           | K7  | 84.74 | 56.34  | 0.9130434 | 0.728395 | 0.870967 | 0.8374688 |
| Mdh2    | P08249 | 45   | SLLK(*)NSPLVSR(*)             | K5  | 79.71 | 1000   | 0.8695652 | 0.839506 | 0.913978 | 0.87435   |
| Mdh2    | P08249 | 185  | ANTFVAELK(*)GLDPR(*)          | K9  | 72.88 | 1000   | 1.0434782 | -        | -        | -         |
| Mdh2    | P08249 | 241  | AK(*)AGAGSATLSMAYAGAR(*)      | K2  | 56.21 | 1000   | 0.5760869 | 0.716049 | 0.763440 | 0.6851924 |
| Mdh2    | P08249 | 301  | K(*)GLEK(*)NLGIGK(*)          | K5  | 53.16 | 49.79  | 0.9565217 | 0.703703 | 0.838709 | 0.8329784 |
| Mdh2    | P08249 | 78   | ANVK(*)GYLGPEQLPDC(+57.02)LK( | K4  | 43.31 | 145.42 | 1.0652173 | 1.580246 | 0.806451 | 1.1506386 |
| Mdh2    | P08249 | 203  | VNVPVIGGHAGK(*)TIPLISQC(+57.0 | K12 | 39.2  | 71.85  | 0.6847826 | -        | 1.333333 | 1.009058  |
| Mdh2    | P08249 | 335  | GEDFVK(*)NMG(*)               | K6  | 7.31  | 24.24  | -         | -        | 2.559139 | 2.785     |
| Polr2a  | P08775 | 710  | AK(*)QDVIEVIEK(*)             | K2  | 66.16 | 161.68 | 0.9777777 | 0.75     | 0.913978 | 0.8805854 |
| Polr2a  | P08775 | 1115 | TFHYAGVSAK(*)NVTLGVPK(*)      | K10 | 43.65 | 1000   | -         | -        | 0.666666 | 0.667     |
| Polr2a  | P08775 | 767  | SLSEYNNFK(*)SMVVSGAK(*)       | K9  | 32.12 | 58.11  | 1.1444444 | -        | 0.860215 | 1.0023297 |
| Polr2a  | P08775 | 445  | PSDLHLQTGYK(*)VER(*)          | K11 | 23.92 | 1000   | -         | -        | 1.129032 | 2.258     |
| Polr2a  | P08775 | 619  | THSTHPDDEDSGPYK(*)HISPGDTK(*) | K15 | 20.24 | 78.75  | -         | -        | 0.913978 | 0.495     |
| Polr2a  | P08775 | 151  | GK(*)NIC(+57.02)EGGEEMDNK(*)  | K2  | 3.89  | 49.63  | -         | -        | 1.935483 | 3.871     |
| Itgb1   | P09055 | 349  | ELK(*)NLIPK(*)                | K3  | 49.37 | 81.69  | 0.6702127 | 0.881578 | 0.887640 | 0.8131441 |
| P4hb    | P09103 | 330  | YK(*)PESDELTAEK(*)            | K2  | 90.08 | 112.07 | 0.7777777 | 0.886075 | 0.923913 | 0.8625889 |
| P4hb    | P09103 | 265  | THILLFLPK(*)SVSDYDGK(*)       | K9  | 86.77 | 97.31  | 0.8989898 | 0.696202 | 0.858695 | 0.8179627 |

|      |        |     |                                |     |       |        |           |          |             |           |
|------|--------|-----|--------------------------------|-----|-------|--------|-----------|----------|-------------|-----------|
| P4hb | P09103 | 108 | FFK(*)NGDTASPK(*)              | K3  | 76.24 | 183.32 | 0.9898989 | 0.810126 | 0.847826    | 0.8826172 |
| P4hb | P09103 | 354 | IK(*)PHLMSQEVPEWDK(*)          | K2  | 71.41 | 107.94 | 0.7171717 | -        | 1           | 0.8585859 |
| P4hb | P09103 | 273 | SVSDYDGK(*)LSSFK(*)            | K8  | 40.68 | 86.16  | 1.4141414 | -        | 0.869565    | 1.1418533 |
| P4hb | P09103 | 354 | IK(*)PHLMSQEVPEWDK(*)QPVK(*)   | K2  | 31.8  | 75.66  | 0.1919191 | 1.240506 | 0.978260    | 0.8035621 |
| P4hb | P09103 | 265 | ILLFLPK(*)SVSDYDGK(*)          | K7  | 26.05 | 71.07  | 1.1818181 | -        | 0.793478    | 0.9876482 |
| P4hb | P09103 | 197 | SGVFSK(*)YQLDK(*)              | K6  | 18.24 | 65.44  | 1         | -        | 0.826086    | 0.9130435 |
| Ncl  | P09405 | 478 | TGK(*)TSTWSGESK(*)             | K3  | 97.5  | 208.83 | 0.8152173 | 0.814814 | 0.978021    | 0.8693514 |
| Ncl  | P09405 | 431 | SK(*)GIAYIEFK(*)               | K2  | 93.29 | 183.32 | 0.9565217 | 0.975308 | 0.923076    | 0.9516358 |
| Ncl  | P09405 | 569 | SQPSK(*)TLFVK(*)               | K5  | 93.24 | 96.85  | 0.8695652 | 0.876543 | 0.923076    | 0.8897285 |
| Ncl  | P09405 | 514 | ATFIK(*)VPQNPHGK(*)            | K5  | 87.75 | 175.25 | 0.8260869 | 0.814814 | 0.868131    | 0.8363445 |
| Ncl  | P09405 | 429 | LVSQDGK(*)SK(*)                | K7  | 81.91 | 30.83  | 1.1413043 | 1.185185 | 1.076923    | 1.1344709 |
| Ncl  | P09405 | 9   | AGK(*)THGEAK(*)                | K3  | 81.8  | 112.31 | 0.9130434 | 0.765432 | 0.945054    | 0.8745102 |
| Ncl  | P09405 | 546 | EALNSC(+57.02)NK(*)MEIEGR(*)   | K8  | 81.08 | 1000   | 0.8695652 | 0.913580 | 1.164835    | 0.9826602 |
| Ncl  | P09405 | 469 | SVSLYYTGK(*)GQR(*)             | K10 | 66.21 | 1000   | 0.9239130 | 1.185185 | 1.604395    | 1.2378313 |
| Ncl  | P09405 | 524 | PK(*)GYAFIEFASFEDAK(*)         | K2  | 61.91 | 179.71 | -         | -        | 0.802197802 |           |
| Ncl  | P09405 | 514 | ATFIK(*)VPQNPHGK(*)PK(*)       | K5  | 60.55 | 51.56  | 0.7826086 | 0.765432 | 0.791208    | 0.7797499 |
| Ncl  | P09405 | 439 | GIAYIEFK(*)SEADA EK(*)         | K8  | 56.29 | 110.43 | 0.9673913 | 0.864197 | 0.769230    | 0.8669399 |
| Ncl  | P09405 | 372 | ALELTGLK(*)VFGNEIK(*)          | K8  | 39.3  | 104.64 | 0.9130434 | -        | 0.538461    | 0.7257525 |
| Ncl  | P09405 | 574 | VK(*)GLSEDTEETLK(*)            | K2  | 31.78 | 151.17 | 0.3260869 | -        | 0.923076    | 0.6245819 |
| Ncl  | P09405 | 320 | IGNLNPKN(*)SVNELK(*)           | K8  | 25.98 | 41.24  | 1.3586956 | -        | 0.857142    | 1.1079193 |
| Ncl  | P09405 | 636 | EAMEDGEIDGNK(*)VTLDWAK(*)PK(*) | K12 | 17.5  | 39.4   | 1.8913043 | -        | 1.615384    | 1.7533445 |
| Pgk1 | P09411 | 353 | GTK(*)SLMDEVVK(*)              | K3  | 98.86 | 192.66 | 0.8804347 | 0.85     | 0.976744    | 0.902393  |
| Pgk1 | P09411 | 30  | VDFNVPMK(*)NNQITNNQR(*)        | K8  | 88.83 | 1000   | 0.9239130 | 0.8125   | 0.930232    | 0.8888819 |
| Pgk1 | P09411 | 156 | ASLSK(*)LGDVYVNDAFGTAHR(*)     | K5  | 88.45 | 1000   | 1.1630434 | -        | 1.127906    | 1.1454752 |
| Pgk1 | P09411 | 91  | SLLGK(*)DVLFLK(*)              | K5  | 83.59 | 156.85 | 0.8913043 | 0.775    | 0.988372    | 0.8848921 |
| Pgk1 | P09411 | 146 | AEPK(*)IDA FR(*)               | K5  | 77.18 | 1000   | 0.8804347 | 0.8375   | 0.930232    | 0.8827224 |
| Pgk1 | P09411 | 220 | VADK(*)IQLINMLDK(*)            | K4  | 69.17 | 276.46 | 0.9347826 | 0.825    | 0.918604    | 0.8927958 |
| Pgk1 | P09411 | 388 | WNTEDK(*)VSHVSTGGGASLELLEGK    | K6  | 64.91 | 373.31 | 1.0326086 | 0.9125   | 1.244186    | 1.0630982 |
| Pgk1 | P09411 | 272 | DLMSK(*)AEK(*)                 | K5  | 59.93 | 45.7   | 0.9021739 | 0.8375   | 1.058139    | 0.9326045 |
| Pgk1 | P09411 | 56  | FC(+57.02)LDNGAK(*)SVVLMShLGI  | K8  | 47.79 | 1000   | 1.1521739 | 0.8875   | 1           | 1.0132246 |
| Pgk1 | P09411 | 56  | FC(+57.02)LDNGAK(*)SVVLMShLGI  | K8  | 26.42 | 130.54 | 1.0326086 | -        | 0.988372    | 1.0104904 |
| Pgk1 | P09411 | 6   | S(+42.01)LSNK(*)LTLDK(*)       | K5  | 24.61 | 105.53 | -         | -        | 0.5         |           |
| Fth1 | P09528 | 125 | LATDK(*)NDPHLC(+57.02)DFIETYYL | K5  | 50.22 | 90.47  | 1.1212121 | -        | 0.831578    | 0.9763955 |
| Fth1 | P09528 | 54  | NFAK(*)YFLHQShEER(*)           | K4  | 40.76 | 1000   | -         | -        | 0.842105263 |           |

|        |        |     |                                 |     |       |        |           |          |                    |
|--------|--------|-----|---------------------------------|-----|-------|--------|-----------|----------|--------------------|
| Hoxc9  | P09633 | 119 | HYALK(*)PDAYPGR(*)              | K5  | 33.56 | 1000   | -         | -        | -                  |
| Sod2   | P09671 | 53  | SK(*)HHAAYVNNLNATEEK(*)         | K2  | 38.26 | 247.16 | 1.0693069 | 1.592105 | 1.2446801 1.302031 |
| Sod2   | P09671 | 194 | YLQYK(*)NVR(*)PDYLK(*)          | K5  | 11.68 | 78.75  | -         | 3.026315 | 2.159574 2.5929451 |
| H2az1  | P0C0S6 | 116 | IHK(*)SLIGK(*)                  | K3  | 93.5  | 107.29 | 0.9479166 | 0.797297 | - 0.872607         |
| H2az1  | P0C0S6 | 8   | G(+42.01)K(*)AGK(*)DSGK(*)AK(*) | K5  | 92.14 | 48.45  | 1.03125   | 1.027027 | - 1.0291385        |
| H2az1  | P0C0S6 | 14  | AGK(*)DSGK(*)AK(*)TK(*)         | K9  | 71.6  | 39.76  | 1.2395833 | 1.486486 | 1.284090 1.3367202 |
| H2az1  | P0C0S6 | 12  | AGK(*)DSGK(*)AK(*)TK(*)         | K7  | 71.6  | 97.69  | 1.2395833 | 1.486486 | 1.284090 1.3367202 |
| H2az1  | P0C0S6 | 8   | AGK(*)DSGK(*)AK(*)TK(*)         | K3  | 71.6  | 216.51 | 1.2395833 | 1.486486 | 1.284090 1.3367202 |
| H2az1  | P0C0S6 | 8   | AGGK(*)AGK(*)DSGK(*)            | K7  | 64.95 | 76.73  | 0.96875   | 1.148648 | 1.136363 1.0845874 |
| H2az1  | P0C0S6 | 5   | AGGK(*)AGK(*)DSGK(*)            | K4  | 64.95 | 148.49 | 0.96875   | 1.148648 | 1.136363 1.0845874 |
| H2az1  | P0C0S6 | 12  | AGGK(*)AGK(*)DSGK(*)AK(*)       | K11 | 45.16 | 39.76  | 0.96875   | 0.027027 | 1.761363 0.9190469 |
| H2az1  | P0C0S6 | 8   | AGGK(*)AGK(*)DSGK(*)AK(*)       | K7  | 45.16 | 132.53 | 0.96875   | 0.027027 | 1.761363 0.9190469 |
| H2az1  | P0C0S6 | 5   | AGGK(*)AGK(*)DSGK(*)AK(*)       | K4  | 45.16 | 208.83 | 0.96875   | 0.027027 | 1.761363 0.9190469 |
| H2az1  | P0C0S6 | 12  | GGK(*)AGK(*)DSGK(*)AK(*)        | K10 | 27.96 | 30.83  | 1.3333333 | -        | 1.272727 1.3030303 |
| H2az1  | P0C0S6 | 8   | GGK(*)AGK(*)DSGK(*)AK(*)        | K6  | 27.96 | 115.89 | 1.3333333 | -        | 1.272727 1.3030303 |
| H2az1  | P0C0S6 | 5   | GGK(*)AGK(*)DSGK(*)AK(*)        | K3  | 27.96 | 195.94 | 1.3333333 | -        | 1.272727 1.3030303 |
| H2az1  | P0C0S6 | 12  | GK(*)AGK(*)DSGK(*)AK(*)         | K9  | 27.09 | 30.83  | -         | 1.040540 | 1.090909 1.0657248 |
| H2az1  | P0C0S6 | 5   | GK(*)AGK(*)DSGK(*)AK(*)         | K2  | 27.09 | 222.06 | -         | 1.040540 | 1.090909 1.0657248 |
| H2az1  | P0C0S6 | 8   | GGK(*)AGK(*)DSGK(*)             | K6  | 9.02  | 77.13  | -         | -        | 1.272727 1.3030303 |
| H2az1  | P0C0S6 | 5   | GGK(*)AGK(*)DSGK(*)             | K3  | 9.02  | 163.4  | -         | -        | 1.272727 1.3030303 |
| Ndufb1 | P0DN34 | 40  | NK(*)SMLFQR(*)                  | K2  | 8.02  | 1000   | 2.8915662 | -        | -                  |
| Calm1  | P0DP26 | 78  | MK(*)DTDSEEEIR(*)               | K2  | 42.65 | 1000   | 1.1287128 | 1.435897 | 1 1.1882034        |
| Anxa1  | P10107 | 250 | YSQHDMNK(*)ALDLELK(*)           | K8  | 88.73 | 140.21 | 1.0210526 | 0.866666 | 0.977011 0.9549103 |
| Anxa1  | P10107 | 287 | LYEAMK(*)GAGTR(*)               | K6  | 88.68 | 1000   | 0.8842105 | 0.906666 | 0.885057 0.8919782 |
| Anxa1  | P10107 | 185 | ALLALAK(*)GDR(*)                | K7  | 86.97 | 1000   | 0.8105263 | 0.84     | 0.977011 0.8758459 |
| Anxa1  | P10107 | 312 | SEIDMNEIK(*)VFYQK(*)            | K9  | 82.73 | 121.37 | 0.9368421 | 0.933333 | 0.908045 0.9260738 |
| Anxa1  | P10107 | 26  | FLENQEYEVQAVK(*)SYK(*)          | K14 | 73.68 | 29.32  | 1.0315789 | 1        | 0.988505 1.0066949 |
| Anxa1  | P10107 | 242 | VFQNYGK(*)YSQHDMNK(*)           | K7  | 67.05 | 36.2   | -         | 0.64     | 1.011494 0.8257471 |
| Anxa1  | P10107 | 29  | SYK(*)GGPGSAVSPYPFNVSSDVAAL     | K3  | 53.39 | 93.61  | 0.7789473 | 1        | 1.264367 1.0144384 |
| Anxa1  | P10107 | 113 | LK(*)TPAQFDADELRL(*)            | K2  | 26.28 | 1000   | 0.3789473 | -        | -                  |
| Eef1a1 | P10126 | 395 | FLK(*)SGDAAIVDMVPGK(*)          | K3  | 97.85 | 286.67 | 0.9042553 | 0.881578 | 0.988372 0.9247355 |
| Eef1a1 | P10126 | 395 | FLK(*)SGDAAIVDMVPGK(*)PMC(+5    | K3  | 96.22 | 187.76 | -         | -        | 0.686046 1.0122876 |
| Eef1a1 | P10126 | 212 | MPWFK(*)GWK(*)                  | K5  | 88.38 | 68.47  | 0.9042553 | -        | 1.209302 1.0567788 |
| Eef1a1 | P10126 | 20  | VDSGK(*)STTTGHLIYK(*)           | K5  | 85.48 | 184.95 | 0.9787234 | 1        | 1.058139 1.0122876 |

|        |        |     |                                 |     |       |        |           |          |          |           |
|--------|--------|-----|---------------------------------|-----|-------|--------|-----------|----------|----------|-----------|
| Eef1a1 | P10126 | 5   | GK(*)EK(*)THINIVVIGHVDSGK(*)    | K4  | 83.65 | 238.57 | 0.5531914 | 1.105263 | 0.965116 | 0.8745236 |
| Eef1a1 | P10126 | 3   | GK(*)EK(*)THINIVVIGHVDSGK(*)    | K2  | 83.65 | 223.59 | 0.5531914 | 1.105263 | 0.965116 | 0.8745236 |
| Eef1a1 | P10126 | 453 | VTK(*)SAQK(*)                   | K3  | 83.15 | 55.21  | -         | -        | 0.965116 | 0.8745236 |
| Eef1a1 | P10126 | 5   | EK(*)THINIVVIGHVDSGK(*)         | K2  | 74.15 | 340.36 | 0.9787234 | 0.894736 | 1        | 0.9578201 |
| Eef1a1 | P10126 | 20  | THINIVVIGHVDSGK(*)STTTGHLIYK(*) | K15 | 72.88 | 198.09 | 1.2127659 | 0.973684 | 1.046511 | 1.0776539 |
| Eef1a1 | P10126 | 36  | STTTGHLIYK(*)C(+57.02)GGIDK(*)R | K16 | 70.8  | 1000   | 0.8936170 | 0.710526 | 1.965116 | 1.1897532 |
| Eef1a1 | P10126 | 30  | STTTGHLIYK(*)C(+57.02)GGIDK(*)R | K10 | 70.8  | 1000   | 0.8936170 | 0.710526 | 1.965116 | 1.1897532 |
| Eef1a1 | P10126 | 20  | IVVIGHVDSGK(*)STTTGHLIYK(*)     | K11 | 67.84 | 57.1   | 0.9787234 | 0.644736 | 1.081395 | 0.9016185 |
| Eef1a1 | P10126 | 255 | LPLQDVYK(*)IGGIGTVPVGR(*)       | K8  | 46.57 | 1000   | 0.6595744 | 1.289473 | 1.186046 | 1.0450316 |
| Eef1a1 | P10126 | 318 | PGDNVGFNVK(*)NVSVK(*)DVR(*)     | K15 | 26.29 | 1000   | -         | -        | 1.174418 | 0.605     |
| Eef1a1 | P10126 | 313 | PGDNVGFNVK(*)NVSVK(*)DVR(*)     | K10 | 26.29 | 1000   | -         | -        | 1.174418 | 0.605     |
| Eef1a1 | P10126 | 408 | SGDAIVDMVPGK(*)PMC(+57.02)\     | K13 | 18.79 | 1000   | -         | -        | 4.604651 | 1.163     |
| Alad   | P10518 | 184 | AALLK(*)HGLGNR(*)               | K5  | 67.1  | 1000   | 0.8703703 | 0.952941 | 0.890109 | 0.9044738 |
| Ctsb   | P10605 | 268 | SGVYK(*)HEAGDMMGGHAIR(*)        | K5  | 86.44 | 1000   | 1.1521739 | 0.822784 | 0.978021 | 0.9843269 |
| Ctsb   | P10605 | 223 | EDK(*)HFGYTSYSVNSVK(*)          | K3  | 57.1  | 121.03 | -         | 0.784810 | 0.879120 | 0.8319655 |
| Ctsb   | P10605 | 263 | SDFLYK(*)SGVYK(*)               | K7  | 49.39 | 95.62  | 0.7065217 | 1.075949 | 0.813186 | 0.8652193 |
| Ctsb   | P10605 | 263 | TVFSDFLYK(*)SGVYK(*)            | K10 | 39.82 | 71.86  | 2.0869565 | -        | 1.131868 | 1.6094123 |
| Txn    | P10639 | 8   | LIESK(*)EAFQEALAAAGDK(*)        | K5  | 30.82 | 183.32 | -         | 1.067567 | -        | -         |
| Gstm1  | P10649 | 124 | QK(*)PEFLK(*)                   | K2  | 10.69 | 81.69  | -         | -        | 0.905882 | 0.353     |
| Tcea1  | P10711 | 252 | EHQMAK(*)TGGTQTDLFTC(+57.02)\   | K6  | 90.21 | 295.03 | 1.0652173 | 0.959459 | 1.010752 | 1.0118098 |
| Tcea1  | P10711 | 32  | ELK(*)NIPMTLELLQSTR(*)          | K3  | 60.65 | 1000   | 0.8586956 | -        | 0.903225 | 0.8809607 |
| Slc3a2 | P10852 | 159 | GLVLGPIHK(*)NQK(*)              | K9  | 81.94 | 57.45  | 0.7708333 | 0.769230 | 0.956521 | 0.8321953 |
| Slc3a2 | P10852 | 114 | WWHK(*)GALYR(*)                 | K4  | 49.04 | 1000   | 0.8541666 | 0.897435 | 1.076086 | 0.9425632 |
| Slc3a2 | P10852 | 148 | SHLEYLSTLK(*)VK(*)              | K10 | 43.87 | 45.01  | 1.1770833 | -        | 1.467391 | 1.3222373 |
| H2bc14 | P10854 | 6   | PEPTK(*)SAPAPK(*)               | K5  | 99.85 | 121.92 | -         | -        | -        | -         |
| H2bc14 | P10854 | 21  | K(*)AVTK(*)AQK(*)               | K5  | 98.3  | 68.47  | -         | -        | -        | -         |
| H2bc14 | P10854 | 21  | AVTK(*)AQK(*)K(*)               | K4  | 96.71 | 87.62  | -         | -        | -        | -         |
| H2bc14 | P10854 | 12  | PEPTK(*)SAPAPK(*)K(*)GSK(*)     | K11 | 52.84 | 38.03  | -         | -        | -        | -         |
| H2bc14 | P10854 | 6   | PEPTK(*)SAPAPK(*)K(*)GSK(*)     | K5  | 52.84 | 82.84  | -         | -        | -        | -         |
| H2bc14 | P10854 | 21  | GSK(*)K(*)AVTK(*)AQK(*)         | K8  | 29    | 68.47  | -         | -        | -        | -         |
| H2bc14 | P10854 | 17  | GSK(*)K(*)AVTK(*)AQK(*)         | K4  | 29    | 186.64 | -         | -        | -        | -         |
| H2bc14 | P10854 | 16  | GSK(*)K(*)AVTK(*)AQK(*)         | K3  | 29    | 216.51 | -         | -        | -        | -         |
| H2bc14 | P10854 | 21  | SK(*)K(*)AVTK(*)AQK(*)          | K7  | 21.09 | 77.24  | -         | -        | -        | -         |
| H2bc14 | P10854 | 17  | SK(*)K(*)AVTK(*)AQK(*)          | K3  | 21.09 | 184.45 | -         | -        | -        | -         |



|        |        |      |                                       |     |       |        |           |          |                    |
|--------|--------|------|---------------------------------------|-----|-------|--------|-----------|----------|--------------------|
| H2bc14 | P10854 | 16   | SK(*)K(*)AVTK(*)AQK(*)                | K2  | 21.09 | 217.23 | -         | -        | -                  |
| H2bc14 | P10854 | 6    | PTK(*)SAPAPK(*)                       | K3  | 16.71 | 72.73  | -         | -        | -                  |
| H2bc14 | P10854 | 6    | PEPTK(*)SAPAPK(*)K(*)                 | K5  | 16.2  | 93.6   | -         | -        | -                  |
| H2bc14 | P10854 | 21   | AVTK(*)AQK(*)                         | K4  | 4.85  | 22.45  | -         | -        | -                  |
| H1-0   | P10922 | 55   | YIK(*)SHYK(*)                         | K3  | 77.57 | 109.97 | 0.9215686 | 0.963855 | 1.025974(0.970466  |
| H1-0   | P10922 | 59   | SHYK(*)VGENADSQIK(*)                  | K4  | 39.17 | 167.76 | 1.8333333 | 0.915662 | 1.233766(1.3275874 |
| Col1a1 | P11087 | 1419 | TVIEYK(*)TTK(*)                       | K6  | 95.08 | 45.7   | 1.2352941 | 1.207547 | 1.083333(1.1753915 |
| Col1a1 | P11087 | 1413 | FTYSTLV DGC(+57.02)TSHTGTW G K19      | K19 | 45.84 | 29.67  | -         | -        | 1.071428571        |
| Col1a1 | P11087 | 1360 | C(+57.02)K(*)NSVAYMDQQTG N L K1       | K2  | 39.46 | 184.14 | 1.8382352 | 1.943396 | 1.202380(1.6613375 |
| Col1a1 | P11087 | 1259 | MC(+57.02)HSDWK(*)SGEY WID P N K7     | K7  | 39.42 | 109.2  | 0.75      | -        | 1.416666(1.0833333 |
| Parp1  | P11103 | 620  | LYEEK(*)TGNAW HSK(*)                  | K5  | 39.47 | 150.63 | 0.9019607 | 1.341772 | 0.760416(1.0013832 |
| Rrm2   | P11157 | 279  | DEGLHC(+57.02)DFAC(+57.02)LMF K14     | K14 | 48.2  | 41.96  | 0.79      | -        | 1.223684(1.0068421 |
| Fn1    | P11276 | 648  | WR(*)PK(*)TSTGR(*)                    | K4  | 81.37 | 1000   | 0.8444444 | -        | -                  |
| Fn1    | P11276 | 1970 | SYTITGLQPGTDYK(*)IHLYTLNDNAR( K14     | K14 | 74.91 | 1000   | 0.9555555 | -        | 0.883720(0.9196382 |
| Fn1    | P11276 | 1039 | GGQPK(*)QYNVGPLASK(*)                 | K5  | 73.24 | 185.69 | 0.6888888 | 0.702702 | 1.244186(0.8785925 |
| Fn1    | P11276 | 554  | WK(*)C(+57.02)DPIDQC(+57.02)Q K2      | K2  | 69.55 | 1000   | 1.0222222 | 0.797297 | 1.011627(0.9437158 |
| Fn1    | P11276 | 101  | GFNC(+57.02)ESK(*)PEPEETC(+57.02) K17 | K17 | 57.49 | 79.54  | -         | 0.648648 | 0.569767(0.609208  |
| Fn1    | P11276 | 1669 | VTTTPK(*)NGLGPSK(*)                   | K6  | 56.51 | 51.59  | -         | 0.783783 | 0.744186(0.7639849 |
| Fn1    | P11276 | 324  | SVGMQWLK(*)SQGNK(*)                   | K8  | 50.51 | 56.94  | 0.8222222 | 3.013513 | -                  |
| Fn1    | P11276 | 2067 | VIALK(*)NNQK(*)                       | K5  | 48.57 | 55.36  | 1.2666666 | -        | 1.139534(1.2031008 |
| Fn1    | P11276 | 1927 | TK(*)TETITGFQVDAIPANGQTPVQR(*) K2     | K2  | 47.42 | 1000   | 1.4888888 | -        | 1.209302(1.3490956 |
| Fn1    | P11276 | 117  | PK(*)DSMIWDC(+57.02)TC(+57.02) K2     | K2  | 46.07 | 1000   | 0.6333333 | 1.162162 | 1.011627(0.9357078 |
| Fn1    | P11276 | 2373 | MSC(+57.02)TC(+57.02)LGNGK(*)G K10    | K10 | 36.41 | 20.17  | -         | -        | 0.802325581        |
| Fn1    | P11276 | 2026 | ITGYI K(*)YEK(*)                      | K7  | 31.42 | 30.72  | 0.9111111 | 0.459459 | 0.593023(0.6545313 |
| Fn1    | P11276 | 58   | PGC(+57.02)FDNGK(*)HYQINQQWI K8       | K8  | 27.32 | 1000   | -         | -        | 0.872093023        |
| Fn1    | P11276 | 1726 | PK(*)GLAFTDVDVDSIK(*)                 | K2  | 20.55 | 148.77 | -         | -        | 1.058139535        |
| Fn1    | P11276 | 2349 | WC(+57.02)HDNGVNYK(*)IGE K(*) K10     | K10 | 15    | 34.3   | 1.7555555 | -        | -                  |
| Fn1    | P11276 | 2353 | IGE K(*)WDR(*)                        | K4  | 7.88  | 1000   | -         | -        | 0.953488372        |
| Fn1    | P11276 | 1069 | NLQPGSEYTVTLVAVK(*)GNQQSPK(*) K16     | K16 | 6.8   | 21.15  | -         | -        | 1.372093023        |
| Lamp1  | P11438 | 352  | SVQVQAFK(*)VSDSR(*)                   | K8  | 51.54 | 1000   | 0.8421052 | -        | -                  |
| Cdk1   | P11440 | 283  | MALK(*)HPYFDDLDNQIK(*)                | K4  | 75.69 | 163.21 | 1.0111111 | 0.8125   | 0.879120(0.9009107 |
| Cdk1   | P11440 | 20   | IGEGTYGVVYK(*)GR(*)                   | K11 | 68.87 | 1000   | 0.7888888 | 0.975    | 1.065934(0.9432743 |
| Cdk1   | P11440 | 245  | WK(*)PGSLASHVK(*)                     | K2  | 66.66 | 106.14 | 0.7       | 0.7125   | 0.758241(0.7235806 |
| Cdk1   | P11440 | 254  | VK(*)NLDENGLDLLSK(*)                  | K2  | 49.53 | 220.79 | 0.9666666 | 0.825    | -                  |

|          |        |     |                               |     |       |        |           |          |          |           |
|----------|--------|-----|-------------------------------|-----|-------|--------|-----------|----------|----------|-----------|
| Hsp90ab1 | P11499 | 531 | EFDGK(*)SLVSVTK(*)            | K5  | 95.76 | 154.98 | 1.0105263 | 0.950617 | 1.067415 | 1.0095198 |
| Hsp90ab1 | P11499 | 72  | ELK(*)IDIIPNPQER(*)           | K3  | 94.27 | 1000   | 0.9368421 | 0.851851 | 0.921348 | 0.9033474 |
| Hsp90ab1 | P11499 | 481 | ETQK(*)SIYYITGESK(*)          | K4  | 91.78 | 187.15 | 0.8421052 | 0.740740 | 1.078651 | 0.8871659 |
| Hsp90ab1 | P11499 | 435 | FYEAFSK(*)NLK(*)              | K7  | 82.11 | 34.94  | 0.9684210 | 0.839506 | 0.730337 | 0.8460881 |
| Hsp90ab1 | P11499 | 559 | AK(*)FENLC(+57.02)K(*)        | K2  | 71.23 | 151.86 | 1.4210526 | 1.111111 | 1.269662 | 1.2672756 |
| Hsp90ab1 | P11499 | 148 | VVVITK(*)HNDDEQYAWESSAGGSFT   | K6  | 58.23 | 1000   | -         | -        | 1.235955 | 0.5056    |
| Krt8     | P11679 | 102 | EQIK(*)SLNNK(*)FASFIDK(*)     | K4  | 3.45  | 76.42  | -         | -        | -        |           |
| Itga5    | P11688 | 947 | VWAK(*)TFLQR(*)               | K4  | 72.14 | 1000   | 1.1363636 | 0.862068 | 0.944444 | 0.980959  |
| Gas2     | P11862 | 247 | MLHnk(*)HVMVR(*)              | K5  | 30.8  | 1000   | 1.2197802 | 1.041095 | 1.139534 | 1.1334703 |
| Tcp1     | P11983 | 317 | DLK(*)HVAK(*)                 | K3  | 97.11 | 97.69  | 0.8       | 0.772151 | 0.741935 | 0.7713625 |
| Tcp1     | P11983 | 153 | DC(+57.02)LINAAK(*)TSMSSK(*)  | K8  | 93.69 | 104.48 | 0.8105263 | 0.721518 | 0.924731 | 0.8189255 |
| Tcp1     | P11983 | 365 | IC(+57.02)DDELILIK(*)NTK(*)   | K10 | 86.69 | 50.22  | 0.7684210 | 0.746835 | 0.860215 | 0.7918239 |
| Tcp1     | P11983 | 111 | QK(*)IHPTSVISGYR(*)           | K2  | 72.19 | 1000   | 0.8947368 | 0.759493 | 0.860215 | 0.8381485 |
| Tcp1     | P11983 | 33  | IVK(*)SSFGPVGLDK(*)           | K3  | 71.32 | 192.46 | 0.7789473 | 0.556962 | 0.935483 | 0.7571311 |
| Tcp1     | P11983 | 243 | IAC(+57.02)LDFSLOK(*)TK(*)    | K10 | 38.03 | 36.05  | 0.6       | 1.202531 | 0.838709 | 0.8804138 |
| Tcp1     | P11983 | 494 | WIGLDLVHGK(*)PR(*)            | K10 | 21.61 | 1000   | 1.4315789 | 1.506329 | 0.838709 | 1.2588726 |
| Tcp1     | P11983 | 33  | AAASIANIVK(*)SSFGPVGLDK(*)    | K10 | 19.7  | 102.98 | -         | -        | 1.129032 | 0.2258    |
| Gusb     | P12265 | 460 | PAAYYFK(*)TLITHTK(*)          | K7  | 25.86 | 72.07  | 0.5652173 | 1.185185 | 0.871794 | 0.8740658 |
| Gusb     | P12265 | 346 | YFQGVNK(*)HEDSDIR(*)          | K7  | 10.25 | 1000   | 2.1086956 | -        | -        |           |
| Prkar2a  | P12367 | 240 | IIVK(*)NNAK(*)                | K4  | 79.52 | 34.3   | -         | -        | 0.943181 | 0.1818    |
| Prkar2a  | P12367 | 158 | IVK(*)TDEHVIDQGDDGDNFYVIER(*) | K3  | 24.38 | 1000   | -         | -        | 1.477272 | 0.727     |
| Pfkl     | P12382 | 386 | IYK(*)LLAHQK(*)               | K3  | 57.86 | 139.02 | 0.8829787 | 0.802469 | 0.934782 | 0.8734102 |
| Pfkl     | P12382 | 677 | NYGTK(*)LGVK(*)               | K5  | 55.58 | 46.31  | 1.0212765 | 0.839506 | 1.043478 | 0.968087  |
| Pfkl     | P12382 | 616 | MK(*)TDIQR(*)                 | K2  | 52.3  | 1000   | 0.8617021 | 1.160493 | 0.913043 | 0.9784131 |
| Cox5a    | P12787 | 58  | NK(*)PDIDAWELR(*)             | K2  | 57.61 | 1000   | 0.5795454 | 0.972972 | 1.121951 | 0.8914899 |
| Rpl7a    | P12970 | 245 | HWGGNVLGPK(*)SVAR(*)          | K10 | 80.21 | 1000   | 0.75      | 0.753246 | 0.934065 | 0.8124376 |
| Rpl7a    | P12970 | 37  | R(*)PK(*)NFGIGQDIQPK(*)       | K3  | 72.5  | 215.95 | 0.61      | 0.701298 | 0.604395 | 0.6385648 |
| Rpl7a    | P12970 | 75  | LK(*)VPPAINQFTQALDR(*)        | K2  | 54.17 | 1000   | -         | -        | 0.615384 | 0.615     |
| Scd2     | P13011 | 36  | FEK(*)SSHHWGADVR(*)PELK(*)    | K3  | 48.14 | 121.4  | 1.1298701 | 1.116666 | 0.941176 | 1.0625711 |
| Gsn      | P13020 | 546 | PMIYK(*)GGTSR(*)              | K6  | 94.35 | 1000   | 0.9021739 | 0.802631 | 0.920454 | 0.8750867 |
| Gsn      | P13020 | 358 | AALK(*)TASDFISK(*)            | K4  | 93.24 | 175.25 | 0.9565217 | 0.763157 | 0.886363 | 0.8686811 |
| Gsn      | P13020 | 392 | QFFK(*)NWR(*)                 | K4  | 91.85 | 1000   | 0.9456521 | 0.921052 | 1.011363 | 0.9593561 |
| Gsn      | P13020 | 97  | VILK(*)TVQLR(*)               | K4  | 81.14 | 1000   | 0.9021739 | 0.671052 | 0.920454 | 0.831227  |
| Gsn      | P13020 | 646 | SQHVQVEEGSEPDADFWEALGGK(*)TA  | K22 | 73.22 | 1000   | -         | -        | 0.954545 | 0.455     |

|        |        |      |                              |     |       |        |           |          |          |             |
|--------|--------|------|------------------------------|-----|-------|--------|-----------|----------|----------|-------------|
| Gsn    | P13020 | 546  | IIYK(*)GGTSR(*)              | K4  | 64.78 | 1000   | 1.0326086 | 1.065789 | 1.113636 | 1.0706782   |
| Gsn    | P13020 | 175  | GGVASGFK(*)HVVVNEVVVQR(*)    | K8  | 57.35 | 1000   | 1.5760869 | 0.921052 | 0.75     | 1.0823799   |
| Gsn    | P13020 | 582  | AVEVMPK(*)SGALNSNDAFVLK(*)   | K7  | 50.13 | 150.63 | 0.8695652 | 1.460526 | 0.579545 | 0.969879    |
| Gsn    | P13020 | 191  | LFQVK(*)GR(*)                | K5  | 45.89 | 1000   | 1.0434782 | 1.105263 | 0.909090 | 1.0192774   |
| Gsn    | P13020 | 160  | SGYFK(*)SGLK(*)              | K5  | 20.4  | 34.3   | -         | 1        | 1        | 1           |
| Gsn    | P13020 | 540  | EPAHLMSLFGGK(*)PMIIYK(*)     | K12 | 13.46 | 90.57  | -         | -        | 1.056818 | 1.0568182   |
| Ncam1  | P13595 | 684  | SK(*)AAHFVFR(*)              | K2  | 74.75 | 1000   | 1.0329670 | -        | 0.873563 | 0.9532651   |
| Ncam1  | P13595 | 121  | LMFK(*)NAPTPQEFK(*)          | K4  | 29.14 | 130.84 | 0.8241758 | 1.514285 | -        | 1.1692308   |
| Ncam1  | P13595 | 539  | AEWK(*)SLGEESWHFK(*)         | K4  | 25.53 | 74.64  | -         | -        | 0.954022 | 0.954022989 |
| Dnmt1  | P13864 | 1124 | GK(*)HQVSEPK(*)EPEAAIK(*)    | K2  | 65.91 | 109.53 | 0.9263157 | 0.831168 | 0.936842 | 0.8981089   |
| Dnmt1  | P13864 | 1124 | GK(*)GK(*)HQVSEPK(*)         | K4  | 22.12 | 178.36 | 0.9894736 | -        | -        |             |
| Dnmt1  | P13864 | 1122 | GK(*)GK(*)HQVSEPK(*)         | K2  | 22.12 | 198.17 | 0.9894736 | -        | -        |             |
| Dnmt1  | P13864 | 932  | VYC(+57.02)SSITK(*)NGVVYR(*) | K8  | 22.11 | 1000   | 0.5052631 | -        | -        |             |
| Dnmt1  | P13864 | 83   | VK(*)SLLNK(*)                | K2  | 6.98  | 81.69  | -         | -        | 1.105263 | 1.105263158 |
| Dnmt1  | P13864 | 1124 | GK(*)HQVSEPK(*)              | K2  | 1.6   | 62.93  | -         | 0.064935 | -        |             |
| S100a6 | P14069 | 47   | ELTIGSK(*)LQDAEIAR(*)        | K7  | 97.37 | 1000   | 0.8679245 | 0.925    | 0.898989 | 0.8973048   |
| S100a6 | P14069 | 26   | YSGK(*)EGDK(*)HTLSK(*)       | K8  | 19.23 | 45.16  | -         | -        | 1.090909 | 1.0909091   |
| S100a6 | P14069 | 22   | YSGK(*)EGDK(*)HTLSK(*)       | K4  | 19.23 | 100.79 | -         | -        | 1.090909 | 1.0909091   |
| S100a6 | P14069 | 26   | EGDK(*)HTLSK(*)              | K4  | 15.43 | 86.16  | -         | -        | 1.040404 | 1.04040404  |
| Rpl27a | P14115 | 94   | NK(*)TGVAPIIDVVR(*)          | K2  | 94.13 | 1000   | 0.7835051 | 0.924050 | 1        | 0.9025186   |
| Rpl27a | P14115 | 55   | YHPGYFGK(*)VGMR(*)           | K8  | 76.13 | 1000   | 1.0515463 | 1.088607 | 0.902173 | 1.0141093   |
| Rpl27a | P14115 | 47   | INFDK(*)YHPGYFGK(*)          | K5  | 73    | 109.41 | 1.0309278 | 0.949367 | 0.891304 | 0.9571998   |
| Rps16  | P14131 | 73   | VK(*)GGGHVAQIYAIR(*)         | K2  | 84.5  | 1000   | 0.8571428 | 0.976470 | 0.978723 | 0.9374456   |
| Rps16  | P14131 | 90   | QSISK(*)ALVAYYQK(*)          | K5  | 72.14 | 115.01 | 0.8061224 | 0.729411 | 1.031914 | 0.8558164   |
| Rpl7   | P14148 | 149  | LNK(*)ASINMLR(*)             | K3  | 92.31 | 1000   | 0.8137254 | 0.771084 | 0.942528 | 0.8424462   |
| Rpl7   | P14148 | 62   | FALK(*)TLR(*)                | K4  | 91.01 | 1000   | 0.9705882 | 0.975903 | -        | 0.9732459   |
| Rpl7   | P14148 | 224  | FK(*)EANNFLWPFK(*)           | K2  | 83.35 | 248.17 | 0.4803921 | -        | 0.919540 | 0.6999662   |
| Rpl7   | P14148 | 126  | GINGVSPK(*)VR(*)             | K8  | 71.39 | 1000   | 0.7941176 | 0.939759 | 1.091954 | 0.9419436   |
| Rpl7   | P14148 | 170  | LK(*)SVNELIYK(*)             | K2  | 52.27 | 154.74 | 0.7058823 | 0.421686 | 1.206896 | 0.7781552   |
| Rpl7   | P14148 | 178  | SVNELIYK(*)R(*)              | K8  | 29.35 | 1000   | -         | -        | 1        |             |
| Rpl7   | P14148 | 51   | NFAELK(*)VK(*)               | K6  | 18.29 | 28.86  | 1.1372549 | 0.662650 | 0.758620 | 0.8528421   |
| Rpl7   | P14148 | 62   | K(*)FALK(*)TLR(*)            | K5  | 12.14 | 77.51  | 0.8529411 | -        | 0.896551 | 0.8747465   |
| Mdh1   | P14152 | 110  | IFK(*)SQGTALEK(*)            | K3  | 96.78 | 144.38 | 0.9898989 | 0.973684 | 1.089887 | 1.0178236   |
| Mdh1   | P14152 | 164  | AK(*)SQIALK(*)               | K2  | 66.75 | 156.85 | 1.0202020 | 0.842105 | 1.101123 | 0.9878103   |

|       |        |     |                                 |     |       |        |           |          |                     |
|-------|--------|-----|---------------------------------|-----|-------|--------|-----------|----------|---------------------|
| Mdh1  | P14152 | 205 | LQGK(*)EVGVYEALK(*)             | K4  | 52.07 | 60.15  | -         | 0.671052 | -                   |
| Mdh1  | P14152 | 179 | LGVTADDVK(*)NVIIWGNHSSTQYPD     | K9  | 49.82 | 126.75 | -         | -        | 0.943820225         |
| Calr  | P14211 | 153 | GK(*)NVLINK(*)                  | K2  | 97.6  | 176.18 | 0.9574468 | 0.9125   | 0.98888880.9529452  |
| Calr  | P14211 | 64  | DK(*)GLQTSQDAR(*)               | K2  | 90.38 | 1000   | 0.9255319 | 0.9375   | 0.88888880.9173069  |
| Calr  | P14211 | 98  | TVK(*)HEQNIDC(+57.02)GGGYVK(*)  | K3  | 85.39 | 293.5  | 1.2446808 | 1.0625   | 1.03333331.1135047  |
| Calr  | P14211 | 48  | SDFGK(*)FVLSSGK(*)              | K5  | 74.88 | 122.76 | 1.0319148 | 1.0125   | 0.86666660.9703605  |
| Calr  | P14211 | 151 | VHVIFNYK(*)GK(*)                | K8  | 74.62 | 28.86  | 0.9042553 | 0.9      | 1.03333330.9458629  |
| Calr  | P14211 | 98  | GQTLVVQFTVK(*)HEQNIDC(+57.02)   | K11 | 67.47 | 67.58  | 0.9893617 | -        | 0.84444440.9169031  |
| Calr  | P14211 | 224 | AK(*)IDDPTDSK(*)PEDWDK(*)PEHII  | K2  | 15.69 | 32.94  | -         | -        | 0.922222222         |
| Srp54 | P14576 | 120 | TTTC(+57.02)SK(*)LAYYYQR(*)     | K6  | 49.2  | 1000   | 0.8125    | 0.52     | 0.61956510.6506884  |
| Srp54 | P14576 | 249 | DK(*)VDVASVIVTK(*)LDGHAK(*)     | K12 | 48.13 | 62.39  | -         | -        | 1.086956522         |
| Srp54 | P14576 | 448 | GGDMSK(*)NVSQSQMAK(*)           | K6  | 17.76 | 97.31  | -         | -        | 1.72826087          |
| Srp54 | P14576 | 323 | LK(*)HGQFTLR(*)                 | K2  | 15.3  | 1000   | -         | 1.186666 | 1.0217391.11042029  |
| Srp54 | P14576 | 131 | GWK(*)TC(+57.02)LIC(+57.02)ADTI | K3  | 14.36 | 1000   | 1.0416666 | 1.506666 | -1.2741667          |
| Hspb1 | P14602 | 202 | AQIGGPEAGK(*)SEQSGAK(*)         | K10 | 51.62 | 64.58  | 1.1666666 | -        | 1.1358021.1512346   |
| Psm3  | P14685 | 292 | IK(*)AIQLEYSEAR(*)              | K2  | 36.21 | 1000   | 0.6702127 | -        | -                   |
| Psm3  | P14685 | 400 | HNVIK(*)TGVR(*)                 | K5  | 4.94  | 1000   | 1.5851063 | -        | 1.4382021.5116543   |
| Lmn1  | P14733 | 533 | VILK(*)NSQGEEVAQR(*)            | K4  | 90.33 | 1000   | 0.9578947 | 0.848101 | 0.9120870.906028    |
| Lmn1  | P14733 | 112 | FK(*)AEHDQLLLNYAK(*)            | K2  | 86.95 | 243.69 | 1.1052631 | 0.987341 | 0.8901090.9942383   |
| Anxa6 | P14824 | 406 | QTFK(*)SHFGR(*)                 | K4  | 85.62 | 1000   | 1.2061855 | 1.194805 | 1.21.2003303        |
| Anxa6 | P14824 | 600 | NK(*)PLFFADK(*)                 | K2  | 82.53 | 122.76 | 0.8350515 | -        | 0.82222210.8286369  |
| Anxa6 | P14824 | 607 | NK(*)PLFFADK(*)LYK(*)           | K9  | 81.38 | 44.44  | 1.1752577 | 0.662337 | 0.85555550.897717   |
| Anxa6 | P14824 | 63  | QEIC(+57.02)QNYK(*)SLYGK(*)     | K8  | 70.17 | 53.48  | -         | 0.766233 | 0.71111110.7386724  |
| Anxa6 | P14824 | 647 | YDK(*)SLHQAIEGDTSGDFMK(*)       | K3  | 68.01 | 171.54 | 1.1030927 | 0.818181 | -0.9606373          |
| Anxa6 | P14824 | 3   | A(+42.01)K(*)IAQGAMYR(*)        | K2  | 58.88 | 1000   | 1.0515463 | 1.129870 | 0.96666660.10493611 |
| Anxa6 | P14824 | 81  | YELTGK(*)FER(*)                 | K6  | 57.4  | 1000   | 0.8659793 | 0.948051 | 0.81111110.8750475  |
| Anxa6 | P14824 | 483 | EDYHK(*)SLEDALSSDTSGHFR(*)      | K5  | 47.76 | 1000   | -         | 0.714285 | -                   |
| Anxa6 | P14824 | 483 | AINEAYK(*)EDYHK(*)SLEDALSSDTSG  | K12 | 33.27 | 45.16  | 1.0412371 | -        | 1.16666660.11039519 |
| Anxa6 | P14824 | 306 | SLYSMIK(*)NDTSGEYK(*)           | K7  | 27.99 | 150.63 | 2         | 1.506493 | 1.9222221.8095719   |
| Anxa6 | P14824 | 299 | YEK(*)SLYSMIK(*)                | K3  | 25.35 | 110.43 | 0.7422680 | -        | -                   |
| Anxa6 | P14824 | 306 | IK(*)NDTSGEYK(*)                | K2  | 22.38 | 78.17  | -         | -        | 1.877777778         |
| Anxa6 | P14824 | 220 | LVFDEYLK(*)TTGK(*)              | K8  | 13.79 | 31.27  | -         | -        | 1.311111111         |
| Anxa6 | P14824 | 265 | AMK(*)GLGTR(*)                  | K3  | 10.94 | 1000   | 1.0721649 | 1.532467 | 1.65555550.14200627 |
| Rpl0  | P14869 | 10  | ATWK(*)SNYFLK(*)                | K4  | 98.22 | 121.92 | 0.8602150 | 0.810126 | 0.95555550.8752991  |

|        |        |      |                                 |     |       |        |           |          |             |           |
|--------|--------|------|---------------------------------|-----|-------|--------|-----------|----------|-------------|-----------|
| Rplp0  | P14869 | 57   | AVVLMGK(*)NTMMR(*)              | K7  | 95.32 | 1000   | 0.8279569 | 0.784810 | 0.9         | 0.837589  |
| Rplp0  | P14869 | 146  | TSFFQALGITTK(*)ISR(*)           | K12 | 90.24 | 1000   | -         | -        | 1.055555556 |           |
| Rplp0  | P14869 | 106  | DMLLANK(*)VPAAAR(*)             | K7  | 59.27 | 1000   | 0.6774193 | 0.848101 | 2.5222222   | 1.3492476 |
| Rplp0  | P14869 | 16   | LK(*)IIQLLDDYPK(*)              | K2  | 52.34 | 149.94 | -         | -        | 0.944444444 |           |
| Rplp0  | P14869 | 50   | GK(*)AVVLMGK(*)                 | K2  | 28.64 | 140.21 | 1.1720430 | -        | 1.1111111   | 1.1415771 |
| Map1b  | P14873 | 506  | LK(*)HLDLFLK(*)                 | K2  | 64.81 | 129.72 | 0.8125    | 0.740259 | 1.011235    | 0.8546652 |
| Map1b  | P14873 | 2192 | TVTYK(*)HMDPPPAPMQDR(*)         | K5  | 49.99 | 1000   | -         | -        | 0.651685393 |           |
| Map1b  | P14873 | 2297 | ATK(*)TTTTPEVK(*)               | K3  | 38.03 | 107.73 | 0.7916666 | 0.870129 | 1.033707    | 0.8985015 |
| Map1b  | P14873 | 429  | LEMYVLNPVK(*)SSK(*)             | K10 | 32.08 | 30.72  | 0.8541666 | 0.805194 | 1.056179    | 0.9051804 |
| Map1b  | P14873 | 555  | ESLK(*)PATK(*)PVASK(*)SVR(*)    | K13 | 29.03 | 61.26  | 0.9583333 | 0.623376 | 1.089887    | 0.8905325 |
| Map1b  | P14873 | 259  | LSK(*)PC(+57.02)C(+57.02)YIFPGG | K3  | 20.78 | 1000   | -         | 1.116883 | 0.797752    | 0.957318  |
| Map1b  | P14873 | 2329 | SAK(*)TATAGPGTTK(*)             | K3  | 16.19 | 52.32  | -         | 0.805194 | 0.808988    | 0.8070918 |
| Hmox1  | P14901 | 196  | MNTLEMTPEVK(*)HR(*)             | K11 | 74.41 | 1000   | 0.9387755 | 0.929411 | 0.948453    | 0.9388803 |
| Jund   | P15066 | 298  | TLK(*)SQNTELASTASLLR(*)         | K3  | 34.45 | 1000   | 0.6413043 | -        | -           |           |
| Cd44   | P15379 | 74   | LALSK(*)GFETC(+57.02)R(*)       | K5  | 64.75 | 1000   | 0.6792452 | -        | 0.827586    | 0.7534157 |
| Cd44   | P15379 | 741  | K(*)PSELNGEASK(*)SQEMVHLVNK(*)  | K11 | 34.6  | 66.25  | 0.7547169 | -        | 0.965517    | 0.8601171 |
| Nme1   | P15532 | 31   | FEQK(*)GFR(*)                   | K4  | 98.19 | 1000   | 0.8865979 | 1.308641 | 0.967741    | 1.0543273 |
| Nme1   | P15532 | 85   | VWEGLNvvK(*)TGR(*)              | K9  | 95.92 | 1000   | 0.8762886 | 0.827160 | 0.935483    | 0.8796443 |
| Nme1   | P15532 | 124  | NIIHGSDSVK(*)SAEK(*)            | K10 | 87.16 | 97.69  | 0.9175257 | 0.888888 | 0.967741    | 0.9247189 |
| Nme1   | P15532 | 85   | MVWEGLNvvK(*)TGR(*)             | K10 | 83.48 | 1000   | 0.8969072 | 0.740740 | 1.086021    | 0.9078898 |
| Nme1   | P15532 | 31   | R(*)FEQK(*)GFR(*)               | K5  | 61.88 | 1000   | 0.6701030 | 0.629629 | 0.623655    | 0.6411295 |
| Nme1   | P15532 | 12   | TFIAIK(*)PDGVQR(*)              | K6  | 60.16 | 1000   | 0.9381443 | 0.925925 | 0.849462    | 0.9045109 |
| Nme1   | P15532 | 85   | YM(+15.99)HSGPVVAMVWEGLNvv      | K19 | 59.19 | 1000   | -         | -        | 0.774193548 |           |
| Nme1   | P15532 | 100  | VMLGETNPADSK(*)PGTIR(*)         | K12 | 52.68 | 1000   | 0.7525773 | 0.716049 | 0.924731    | 0.797786  |
| H1-2   | P15864 | 85   | LGLK(*)SLVSK(*)                 | K4  | 96.52 | 115.97 | 1         | 0.795180 | 1.082191    | 0.9591242 |
| H1-2   | P15864 | 75   | ALAAAGYDVEK(*)NNSR(*)           | K11 | 91.21 | 1000   | 1.1395348 | 0.951807 | 1.342465    | 1.1446026 |
| H1-2   | P15864 | 46   | ASGPPVSELITK(*)AVAASK(*)        | K12 | 70.65 | 116.54 | 0.7674418 | -        | 0.904109    | 0.8357757 |
| H1-2   | P15864 | 90   | SLVSK(*)GILVQTK(*)              | K5  | 43.32 | 128.65 | 0.9186046 | -        | 0.794520    | 0.8565626 |
| H1-2   | P15864 | 46   | K(*)ASGPPVSELITK(*)AVAASK(*)    | K13 | 20.2  | 90.32  | -         | 1.132530 | -           |           |
| H1-2   | P15864 | 97   | GILVQTK(*)GTGASGSFK(*)          | K7  | 13.91 | 62.82  | -         | 1.602409 | 0.931506    | 1.2669582 |
| Lgals1 | P16045 | 64   | FNAHGDANTIVC(+57.02)NTK(*)EDC   | K15 | 96.38 | 1000   | 1         | 0.792207 | 1.034482    | 0.9422302 |
| Lgals1 | P16045 | 19   | A(+42.01)C(+57.02)GLVASNLNLK(*) | K18 | 84.75 | 42.99  | 0.8659793 | 0.974025 | 0.931034    | 0.9236799 |
| Lgals1 | P16045 | 19   | VASNLNLK(*)PGEC(+57.02)LK(*)VR  | K14 | 84.54 | 47.92  | 0.7319587 | 0.818181 | 0.896551    | 0.8155641 |
| Lgals1 | P16045 | 29   | GEVASDAK(*)SFVLNLGK(*)          | K8  | 83.95 | 197.82 | 0.8762886 | 0.753246 | 1.137931    | 0.9224888 |

|        |        |      |                                 |     |       |        |           |          |          |           |
|--------|--------|------|---------------------------------|-----|-------|--------|-----------|----------|----------|-----------|
| Lgals1 | P16045 | 19   | PGEC(+57.02)LK(*)VR(*)          | K6  | 79.22 | 1000   | 0.8762886 | 0.662337 | 0.816091 | 0.7849061 |
| Lgals1 | P16045 | 64   | TIVC(+57.02)NTK(*)EDGTWGTEHR(   | K7  | 68.15 | 1000   | 0.8453608 | 0.636363 | 0.942528 | 0.8080844 |
| Lgals1 | P16045 | 64   | TK(*)EDGTWGTEHR(*)              | K2  | 38.19 | 1000   | -         | -        | 1.229885 | 0.57      |
| Lgals1 | P16045 | 108  | LPDGHEFK(*)FPNR(*)              | K8  | 36.01 | 1000   | 1.5257731 | -        | -        |           |
| Lgals1 | P16045 | 64   | GDANTIVC(+57.02)NTK(*)EDGTWG    | K11 | 35.9  | 1000   | -         | 1.194805 | 0.965517 | 1.0801612 |
| Lgals1 | P16045 | 29   | VR(*)GEVASDAK(*)SFVLNLGK(*)     | K10 | 33.11 | 131.34 | 2.3092783 | -        | 1.540229 | 1.9247541 |
| Lgals1 | P16045 | 19   | LK(*)PGEC(+57.02)LK(*)VR(*)     | K8  | 32.09 | 90.57  | 0.8659793 | 0.766233 | 0.919540 | 0.8505845 |
| Lgals1 | P16045 | 37   | LGK(*)DSNNLC(+57.02)LHFNPR(*)   | K3  | 25.69 | 1000   | 1.3092783 | 1.259740 | 1.425287 | 1.3314353 |
| Lgals1 | P16045 | 29   | ASDAK(*)SFVLNLGK(*)             | K5  | 3.44  | 154.74 | -         | -        | 0.494252 | 0.874     |
| Lgals3 | P16110 | 190  | VIVC(+57.02)NTK(*)QDNNWGK(*)    | K7  | 76.8  | 144.88 | 1         | 0.797101 | 1.171052 | 0.9893847 |
| Ldhb   | P16125 | 156  | LSGLPK(*)HR(*)                  | K6  | 43.11 | 1000   | 0.7282608 | 0.928571 | 0.988095 | 0.8816425 |
| Sptan1 | P16546 | 2047 | DQLLAAK(*)HIQSK(*)              | K7  | 80.53 | 105.53 | 1.0106382 | 1.105263 | 0.945054 | 1.0203188 |
| Sptan1 | P16546 | 613  | VQK(*)HQAFAELSANQSR(*)          | K3  | 75.93 | 1000   | 1.0106382 | 1        | 0.956043 | 0.9888941 |
| Sptan1 | P16546 | 229  | TK(*)QDEVNAAWQR(*)              | K2  | 73.85 | 1000   | 0.9468085 | 1.236842 | 1.021978 | 1.0685429 |
| Sptan1 | P16546 | 2349 | LNHQEFK(*)SC(+57.02)LR(*)       | K7  | 72.97 | 1000   | 0.8617021 | 0.960526 | 1        | 0.9407428 |
| Sptan1 | P16546 | 2404 | ETENVK(*)SSEEIESAFR(*)          | K6  | 59.5  | 1000   | 0.9361702 | 0.868421 | 0.967032 | 0.9238747 |
| Sptan1 | P16546 | 2333 | EFSMMFK(*)HFDK(*)DK(*)          | K7  | 47.97 | 48.12  | 1.2872340 | 0.789473 | 0.967032 | 1.0145802 |
| Sptan1 | P16546 | 84   | LQK(*)HQAFAEVQANSQAIVK(*)       | K3  | 33.49 | 153.54 | 1.4361702 | 1.289473 | -        | 1.3628219 |
| Sptan1 | P16546 | 814  | GK(*)DLIGVQNLLK(*)              | K2  | 19.79 | 150.82 | -         | -        | 1.010989 | 0.11      |
| Sptan1 | P16546 | 2426 | ALSSEGK(*)PYVTK(*)EELYQNLTR(*)  | K12 | 16.87 | 30.64  | -         | -        | 1.736263 | 0.736     |
| Ctsa   | P16675 | 55   | ASDSK(*)HFHYWFVESQNDPK(*)       | K5  | 46.3  | 146.08 | 1.4893617 | 0.802631 | 0.936842 | 1.0762785 |
| Gapdh  | P16858 | 252  | LEK(*)PAK(*)YDDIK(*)            | K6  | 76.57 | 42.6   | 0.7938144 | 0.843373 | 0.806818 | 0.8146687 |
| Gapdh  | P16858 | 192  | TVDGPSGK(*)LWR(*)               | K8  | 74.71 | 1000   | 0.8453608 | 0.843373 | 1.079545 | 0.9227599 |
| Gapdh  | P16858 | 217  | AVGK(*)VIPELNGK(*)              | K4  | 66.58 | 92.28  | -         | 0.759036 | 0.568181 | 0.663609  |
| Gapdh  | P16858 | 70   | GK(*)PITIFQER(*)                | K2  | 37.99 | 1000   | -         | 1.144578 | 0.647727 | 0.8961528 |
| Gapdh  | P16858 | 252  | LEK(*)PAK(*)YDDIK(*)K(*)        | K6  | 28.16 | 29.32  | -         | 0.891566 | 0.340909 | 0.6162377 |
| Gapdh  | P16858 | 3    | VK(*)VGVNGFGR(*)                | K2  | 14.9  | 1000   | -         | -        | 2.045454 | 0.545     |
| Zfx    | P17012 | 489  | AIEC(+57.02)DEC(+57.02)GK(*)HFS | K9  | 62.88 | 44.94  | -         | -        | -        |           |
| Lamp2  | P17047 | 67   | TITIAVPDK(*)ATHDGSSC(+57.02)G   | K9  | 41.55 | 1000   | -         | 0.792207 | 1.1375   | 0.9648539 |
| Hmga1  | P17095 | 7    | S(+42.01)ESGSK(*)SSQPLASK(*)    | K6  | 52.95 | 139.85 | -         | -        | -        |           |
| Eno1   | P17182 | 228  | EAELELLK(*)TAIAK(*)             | K7  | 99.26 | 127.18 | 0.9042553 | 0.771084 | 0.901098 | 0.8588129 |
| Eno1   | P17182 | 60   | FMGK(*)GVSQAVEHINK(*)           | K4  | 98.41 | 281.19 | 0.9468085 | 0.867469 | 0.923076 | 0.9124518 |
| Eno1   | P17182 | 335  | AASEK(*)SC(+57.02)NC(+57.02)LLL | K5  | 91.07 | 171.6  | 0.9680851 | 0.819277 | 1        | 0.9291207 |
| Eno1   | P17182 | 193  | IGAENVYHNLK(*)NVIK(*)           | K10 | 77.88 | 88.98  | 0.9255319 | 0.855421 | 0.945054 | 0.9086695 |



|       |        |     |                                 |     |       |        |           |          |             |           |
|-------|--------|-----|---------------------------------|-----|-------|--------|-----------|----------|-------------|-----------|
| Eno1  | P17182 | 28  | GNPTVEVDLYTAK(*)GLFR(*)         | K13 | 67.93 | 1000   | 0.9148936 | 0.493975 | 0.879120    | 0.7626635 |
| Eno1  | P17182 | 92  | IDK(*)LMIEMDGTENK(*)            | K3  | 60.43 | 139.71 | -         | -        | 0.769230769 |           |
| Eno1  | P17182 | 256 | SGK(*)YDLDFK(*)                 | K3  | 59.76 | 134.33 | 0.9042553 | -        | 0.758241    | 0.8312485 |
| Eno1  | P17182 | 71  | GVSQAVEHINK(*)TIAPALVSK(*)      | K11 | 59.45 | 97.64  | 1.0744680 | 0.831325 | 1.021978    | 0.9759238 |
| Eno1  | P17182 | 103 | LMIEMDGTENK(*)SK(*)             | K11 | 56.96 | 30.83  | 1.0957446 | -        | 0.978021    | 1.0368833 |
| Eno1  | P17182 | 343 | SC(+57.02)NC(+57.02)LLLK(*)VNQI | K8  | 55.11 | 168.02 | -         | -        | 0.802197802 |           |
| Eno1  | P17182 | 193 | GAEVYHNLK(*)NVIK(*)             | K9  | 43.84 | 63.97  | 0.9148936 | 1.084337 | 0.956043    | 0.9850916 |
| Eno1  | P17182 | 262 | YDLDFK(*)SPDDPSR(*)             | K6  | 38.82 | 1000   | -         | -        | 1.131868132 |           |
| Ptbp1 | P17225 | 217 | TK(*)NNQFQALLQYADPVSAQHAK(*)    | K2  | 81.56 | 413.48 | 0.9684210 | 0.907894 | 0.935483    | 0.9372666 |
| Ptbp1 | P17225 | 366 | VK(*)ILFNK(*)                   | K2  | 77.46 | 142.99 | 0.8947368 | 0.868421 | 0.956989    | 0.9067157 |
| Ptbp1 | P17225 | 258 | IDFSK(*)LTSLNVK(*)              | K5  | 72.73 | 142.27 | 0.7894736 | 0.75     | 0.903225    | 0.8142332 |
| Ptbp1 | P17225 | 217 | IITFTK(*)NNQFQALLQYADPVSAQHA    | K6  | 63.23 | 150.82 | 0.7789473 | -        | 0.892473    | 0.8357102 |
| Ptbp1 | P17225 | 91  | VTNLLMLK(*)GK(*)                | K8  | 56.65 | 33.18  | 0.7157894 | 0.907894 | 0.903225    | 0.8423033 |
| Ptbp1 | P17225 | 211 | FGTVLK(*)IITFTK(*)              | K6  | 44.95 | 85.52  | -         | -        | 0.946236559 |           |
| Ap2a1 | P17426 | 378 | THIDTVINALK(*)TER(*)            | K11 | 56.48 | 1000   | 0.5959595 | -        | 0.876288    | 0.7361241 |
| Ap2a1 | P17426 | 177 | LYK(*)ASPDLVPMGEWTAR(*)         | K3  | 29.75 | 1000   | -         | 1.051948 | -           |           |
| Ap2a1 | P17426 | 894 | IFK(*)ANHPMDAEVTK(*)            | K3  | 9.73  | 122.88 | -         | -        | 1.278350515 |           |
| Ap2a2 | P17427 | 117 | LINNAIK(*)NDLASR(*)             | K7  | 79.74 | 1000   | 1.28      | 0.876543 | 0.96875     | 1.0417644 |
| Ap2a2 | P17427 | 377 | THIETVINALK(*)TER(*)            | K11 | 60.2  | 1000   | 0.81      | 0.604938 | 0.958333    | 0.7910905 |
| Ap2a2 | P17427 | 569 | SDSQLK(*)NADVELQQR(*)           | K6  | 51.58 | 1000   | 1.29      | 0.617283 | 0.989583    | 0.9656224 |
| Ppia  | P17742 | 31  | VPK(*)TAENFR(*)                 | K3  | 99.65 | 1000   | 0.82      | 0.795180 | 0.891304    | 0.835495  |
| Ppia  | P17742 | 131 | HVVFGK(*)VK(*)                  | K6  | 97.88 | 36.05  | 0.78      | 0.795180 | 0.847826    | 0.8076689 |
| Ppia  | P17742 | 49  | GFGYK(*)GSSFHR(*)               | K5  | 96.96 | 1000   | 0.82      | 0.867469 | 0.934782    | 0.8740842 |
| Ppia  | P17742 | 44  | ALSTGEK(*)GFGYK(*)              | K7  | 96.62 | 94.22  | 0.9       | 0.915662 | 0.956521    | 0.9240615 |
| Ppia  | P17742 | 118 | FIC(+57.02)TAK(*)TEWLDGK(*)     | K6  | 82.32 | 110.43 | 0.79      | 0.867469 | 0.945652    | 0.8677074 |
| Ppia  | P17742 | 125 | WLDGK(*)HVVFGK(*)               | K5  | 78.1  | 123.86 | 0.95      | 0.867469 | 0.934782    | 0.9174175 |
| Ppia  | P17742 | 125 | TEWLDGK(*)HVVFGK(*)             | K7  | 76.3  | 156.85 | 0.92      | 0.879518 | 0.967391    | 0.9223031 |
| Ppia  | P17742 | 118 | IC(+57.02)TAK(*)TEWLDGK(*)      | K5  | 60.04 | 125.04 | 1.12      | 0.903614 | 0.793478    | 0.9390309 |
| Ppia  | P17742 | 118 | TAK(*)TEWLDGK(*)                | K3  | 49.55 | 148.49 | -         | 1.939759 | 0.978260    | 1.45901   |
| Ppia  | P17742 | 31  | VSFELFADK(*)VPK(*)TAENFR(*)     | K12 | 48.74 | 68.47  | 1.02      | 1.409638 | 0.826086    | 1.0852418 |
| Ppia  | P17742 | 125 | EWLDGK(*)HVVFGK(*)              | K6  | 40.73 | 143.14 | 0.9       | 0.963855 | 0.826086    | 0.8966475 |
| Ppia  | P17742 | 28  | VSFELFADK(*)VPK(*)              | K9  | 27.55 | 41.59  | 27.02     | -        | -           |           |
| Ppia  | P17742 | 118 | AK(*)TEWLDGK(*)                 | K2  | 24.19 | 138.74 | 0.8       | -        | 2.478260    | 1.6391304 |
| Ppia  | P17742 | 49  | GYK(*)GSSFHR(*)                 | K3  | 22.17 | 1000   | -         | -        | 1.043478261 |           |

|         |        |      |                                 |     |       |        |           |          |          |           |
|---------|--------|------|---------------------------------|-----|-------|--------|-----------|----------|----------|-----------|
| Ppia    | P17742 | 131  | TEWLDGK(*)HVVFGK(*)VK(*)        | K13 | 22.1  | 20.41  | -         | 0.987951 | 0.782608 | 0.8852803 |
| Ppia    | P17742 | 125  | TEWLDGK(*)HVVFGK(*)VK(*)        | K7  | 22.1  | 135.81 | -         | 0.987951 | 0.782608 | 0.8852803 |
| Tpi1    | P17751 | 244  | GWLK(*)SNVNDGVAQSTR(*)          | K4  | 98.55 | 1000   | 0.8901098 | 0.891891 | 1.247191 | 1.0097309 |
| Tpi1    | P17751 | 199  | VVFEQTK(*)VIADNVK(*)            | K7  | 96.38 | 128.65 | 0.9670329 | 0.945945 | 0.943820 | 0.9522664 |
| Tpi1    | P17751 | 225  | VVLAYEPVWAIGTGK(*)TATPQQAQE'    | K15 | 72.07 | 59.65  | 1.0219780 | 1.094594 | 1.235955 | 1.1175092 |
| Tpi1    | P17751 | 119  | IAVAAQNC(+57.02)YK(*)VTNGAFTG   | K10 | 68.24 | 170.4  | 1.1208791 | -        | 1.662921 | 1.3919002 |
| Mthfd2  | P18155 | 88   | R(*)PHLSVILVGDNPAHSYVLNK(*)T    | K22 | 49.43 | 1000   | 0.9247311 | 0.789473 | 0.956043 | 0.8900829 |
| Mthfd2  | P18155 | 194  | TGIPTLGK(*)NVVVAGR(*)           | K8  | 46.93 | 1000   | 0.6666666 | 1.065789 | 0.912087 | 0.8815147 |
| Ctsd    | P18242 | 355  | YILK(*)VSQGGK(*)                | K4  | 67.24 | 95.35  | 1         | 0.786666 | 0.988235 | 0.9249673 |
| Ctsd    | P18242 | 343  | LGGK(*)NYELHPDK(*)              | K4  | 22.35 | 99.23  | -         | 1.066666 | 1        | 1.0333333 |
| Rps6ka3 | P18654 | 525  | TITK(*)TVEYLHAQGVVHR(*)         | K4  | 49.04 | 1000   | 0.6346153 | -        | 0.77     | 0.7023077 |
| Cfl1    | P18760 | 114  | SK(*)MIYASSK(*)                 | K2  | 93.45 | 160.69 | 0.8775510 | 0.792207 | 1.081395 | 0.9170514 |
| Cfl1    | P18760 | 19   | VFNDMK(*)VR(*)                  | K6  | 89.26 | 1000   | 0.8877551 | 0.818181 | 1.023255 | 0.9097309 |
| Cfl1    | P18760 | 132  | LTGIK(*)HELQANC(+57.02)YEEVK(*) | K5  | 79.3  | 281.43 | 0.9285714 | 0.753246 | 1        | 0.8939394 |
| Cfl1    | P18760 | 132  | K(*)LTGIK(*)HELQANC(+57.02)YEEV | K6  | 70.44 | 86.16  | 0.6530612 | 0.714285 | 0.755813 | 0.7077203 |
| Cfl1    | P18760 | 92   | YALYDATYETK(*)ESK(*)            | K11 | 67.24 | 26.52  | 1.2346938 | 0.792207 | 1.058139 | 1.0283471 |
| Cfl1    | P18760 | 132  | LTGIK(*)HELQANC(+57.02)YEEVK(*) | K5  | 63.69 | 336.59 | 1.1326530 | 0.987012 | 0.802325 | 0.9739972 |
| Cfl1    | P18760 | 132  | K(*)LTGIK(*)HELQANC(+57.02)YEEV | K6  | 58.16 | 52.68  | 1.1020408 | 0.974025 | 1.069767 | 1.0486114 |
| Gnao1   | P18872 | 193  | TTGIVETHFTFK(*)NLHFR(*)         | K12 | 54.69 | 1000   | 0.8782608 | -        | 0.948453 | 0.9133572 |
| Fasn    | P19096 | 70   | FDASFFGVHPK(*)QAHTMDPQLR(*)     | K11 | 92.5  | 1000   | 1.0421052 | 0.871794 | 0.989130 | 0.9676769 |
| Fasn    | P19096 | 776  | GVK(*)SSC(+57.02)TIIPLMK(*)     | K3  | 88.64 | 149.94 | 0.6736842 | 0.820512 | 0.891304 | 0.7951671 |
| Fasn    | P19096 | 2187 | K(*)LQEMSSK(*)TDSATD TTAPK(*)   | K8  | 84.12 | 81.81  | 0.6947368 | 0.769230 | 0.869565 | 0.7778443 |
| Fasn    | P19096 | 1143 | ELQLC(+57.02)K(*)GLAR(*)        | K6  | 77.82 | 1000   | 0.8210526 | 0.756410 | 0.967391 | 0.8482847 |
| Fasn    | P19096 | 2399 | VAASVDLITK(*)SHHSLDR(*)         | K10 | 76.07 | 1000   | 0.9578947 | 0.948717 | 1        | 0.9688709 |
| Fasn    | P19096 | 1840 | YM(+15.99)AQGK(*)HIGK(*)        | K6  | 69.53 | 63.97  | -         | 0.782051 | -        |           |
| Fasn    | P19096 | 2198 | TDSATD TTAPK(*)SR(*)            | K11 | 69.12 | 1000   | 0.5052631 | 0.756410 | -        | 0.6308367 |
| Fasn    | P19096 | 1920 | TGYQAK(*)HIR(*)                 | K6  | 66.52 | 1000   | 1.0421052 | 0.717948 | 1.097826 | 0.9526267 |
| Fasn    | P19096 | 1584 | LSPDAIPGK(*)WASR(*)             | K9  | 61.72 | 1000   | -         | -        | 1.163043 | 0.478     |
| Fasn    | P19096 | 2187 | LQEMSSK(*)TDSATD TTAPK(*)       | K7  | 59.56 | 180.02 | 0.9263157 | -        | 0.826086 | 0.8762014 |
| Fasn    | P19096 | 1844 | HIGK(*)VLVQVR(*)                | K4  | 58.81 | 1000   | 0.6947368 | 0.717948 | 1.032608 | 0.8150981 |
| Fasn    | P19096 | 1491 | LDPGSPQLQVLK(*)HDLVMNVYR(*)     | K13 | 54.78 | 1000   | 1.0315789 | -        | 1.423913 | 1.227746  |
| Fasn    | P19096 | 2442 | AK(*)TGGTYGEDLGADYNLSQVC(+57    | K2  | 49.76 | 250.91 | -         | -        | 1.304347 | 0.826     |
| Fasn    | P19096 | 2431 | AK(*)YHGNVTLLR(*)               | K2  | 27.25 | 1000   | 0.6315789 | -        | 1.717391 | 1.1744851 |
| Fasn    | P19096 | 2384 | VLEALLPLK(*)SLEDR(*)            | K9  | 24.65 | 1000   | 0.7473684 | -        | 0.434782 | 0.5910755 |

|          |        |      |                               |     |       |        |           |          |                    |           |
|----------|--------|------|-------------------------------|-----|-------|--------|-----------|----------|--------------------|-----------|
| Fasn     | P19096 | 1826 | C(+57.02)TVFPK(*)AQVEDAFR(*)  | K6  | 17.57 | 1000   | 1.3578947 | -        | -                  |           |
| Fasn     | P19096 | 2187 | SSK(*)TDSATDTTAPK(*)          | K3  | 16.64 | 176.81 | 0.8631578 | 0.910256 | 1.391304;1.0549062 |           |
| Gstp1    | P19157 | 82   | SLGLYGK(*)NQR(*)              | K7  | 71.47 | 1000   | 0.9662921 | 1        | 0.988764(0.9850187 |           |
| Gstp1    | P19157 | 103  | GK(*)YVTLIYTNYENGK(*)         | K2  | 47.12 | 205.45 | -         | -        | 0.91011236         |           |
| Rpl13a   | P19253 | 53   | LK(*)YLAFLR(*)                | K2  | 38.2  | 1000   | -         | 1.123456 | 0.968421(1.0459389 |           |
| Rpl13a   | P19253 | 103  | LK(*)VLDGIPPPYDK(*)           | K2  | 29.12 | 176.98 | -         | 0.716049 | -                  |           |
| Serpinh1 | P19324 | 216  | FHHK(*)MVDNR(*)               | K4  | 94.51 | 1000   | 0.9897959 | 0.898734 | 1.042105;0.9768785 |           |
| Serpinh1 | P19324 | 286  | LLTK(*)EQLK(*)                | K4  | 91.58 | 97.69  | 0.8469387 | 0.810126 | 0.936842;0.8646358 |           |
| Serpinh1 | P19324 | 159  | QHYN C(+57.02)EHSK(*)INFR(*)  | K9  | 84.69 | 1000   | 1.0714285 | 0.962025 | 1.094736;1.0427302 |           |
| Serpinh1 | P19324 | 318  | GVVEVTHDLQK(*)HLA GLGLTEAIDK( | K11 | 80.65 | 366.7  | 1.2040816 | 0.974683 | 0.926315;1.035027  |           |
| Serpinh1 | P19324 | 206  | FK(*)PHWDEK(*)                | K2  | 76.29 | 72.77  | -         | 1        | 1.042105;1.0210526 |           |
| Serpinh1 | P19324 | 206  | AMFFK(*)PHWDEK(*)             | K5  | 74.89 | 121.2  | 1.1632653 | 1.354430 | 1.084210;1.2006354 |           |
| Serpinh1 | P19324 | 206  | FFK(*)PHWDEK(*)               | K3  | 67.49 | 143.14 | 0.7755102 | 0.620253 | 0.8                | 0.7319211 |
| Serpinh1 | P19324 | 295  | AWMGK(*)MQK(*)                | K5  | 49.99 | 28.96  | 0.9591836 | 0.822784 | 1.115789;0.9659193 |           |
| Serpinh1 | P19324 | 38   | LSSK(*)ATTLAER(*)             | K4  | 49.69 | 1000   | 0.8061224 | -        | 0.894736;0.8504296 |           |
| Serpinh1 | P19324 | 150  | SSK(*)QHYN C(+57.02)EHSK(*)   | K3  | 36.84 | 105.42 | 1.2244897 | 1.151898 | -                  | 1.1881943 |
| Serpinh1 | P19324 | 212  | PHWDEK(*)FHHK(*)              | K6  | 28.05 | 58.99  | -         | -        | 1.094736842        |           |
| Cox5b    | P19536 | 73   | AASGTK(*)EDPNLVPSISNK(*)      | K6  | 31.04 | 86.82  | 0.6477272 | 1.791666 | 0.681818;1.040404  |           |
| Cox4i1   | P19783 | 29   | AHGSVVK(*)SEDYAFPTYADR(*)     | K7  | 83.17 | 1000   | 0.9223300 | 0.779069 | 0.886597;0.8626659 |           |
| Cox4i1   | P19783 | 67   | EK(*)ADWSSLSR(*)              | K2  | 41.71 | 1000   | 0.9708737 | 1.488372 | 1.051546;1.1702641 |           |
| Hspa5    | P20029 | 524  | NK(*)ITITNDQNR(*)             | K2  | 83.05 | 1000   | 1.2446808 | 0.878048 | 0.890109;1.0042798 |           |
| Hspa5    | P20029 | 155  | MK(*)ETA EAYLGK(*)            | K2  | 80.82 | 203.33 | 1.0106382 | 1        | 0.901098;0.9705791 |           |
| Hspa5    | P20029 | 82   | LIGDAAK(*)NQLTSNPENTVFD AK(*) | K7  | 46.62 | 142.24 | 0.7872340 | -        | 1.054945(0.9210895 |           |
| Hspa5    | P20029 | 126  | TK(*)PYIQVDIGGGQTK(*)         | K2  | 39.35 | 100.88 | 1.0425531 | 0.817073 | 0.527472;0.7956996 |           |
| Hspa5    | P20029 | 574  | SLK(*)NQIGDK(*)               | K3  | 33.85 | 78.19  | -         | 1.085365 | -                  |           |
| Hspa5    | P20029 | 327  | AK(*)FEELNMDLFR(*)            | K2  | 16.34 | 1000   | -         | -        | 1.626373626        |           |
| Hspa5    | P20029 | 383  | EFFNGK(*)EPSR(*)              | K6  | 5.24  | 1000   | 0.3191489 | -        | -                  |           |
| Hexb     | P20060 | 196  | HFLPVK(*)TILK(*)              | K6  | 33.74 | 35.82  | 0.7731958 | 0.821428 | 0.961538;0.8520543 |           |
| Hexb     | P20060 | 444  | NYYK(*)VEPLNFEGSEK(*)         | K4  | 6.31  | 41.98  | -         | -        | 0.91025641         |           |
| Prdx3    | P20108 | 197  | GLFIIDPNGVVK(*)HLSVNDLPVGR(*) | K12 | 80.85 | 1000   | -         | -        | 1.225806452        |           |
| Vim      | P20152 | 445  | TLLIK(*)TVETR(*)              | K5  | 98.35 | 1000   | 0.9375    | 0.936708 | 0.977777;0.9506622 |           |
| Vim      | P20152 | 292  | NLQEAEEWYK(*)SK(*)            | K10 | 96.74 | 30.83  | 0.8020833 | 0.873417 | 0.966666(0.8807226 |           |
| Vim      | P20152 | 120  | FANYIDK(*)VR(*)               | K7  | 94.23 | 1000   | 0.875     | 0.860759 | 0.9                | 0.8785865 |
| Vim      | P20152 | 139  | ILLAELEQLK(*)GQ GK(*)         | K10 | 84.39 | 76.73  | 0.8854166 | 1.265822 | 0.955555;1.0355983 |           |

|       |        |      |                                |     |       |        |           |          |             |
|-------|--------|------|--------------------------------|-----|-------|--------|-----------|----------|-------------|
| Vim   | P20152 | 282  | QQYESVAAK(*)NLQEAEEWYK(*)      | K9  | 52.81 | 258.5  | -         | -        | 1.211111111 |
| Vim   | P20152 | 439  | ETNLESLPLVDTHSK(*)R(*)         | K15 | 36.81 | 1000   | -         | -        | 0.944444444 |
| Vim   | P20152 | 104  | TNEK(*)VELQELNDR(*)            | K4  | 23.41 | 1000   | 2.3020833 | -        | -           |
| Vim   | P20152 | 129  | FLEQQNK(*)ILLAELEQLK(*)        | K7  | 20.37 | 168.06 | -         | -        | 1.077777778 |
| Vim   | P20152 | 168  | QVDQLTNDK(*)AR(*)              | K9  | 16.9  | 1000   | 1.1875    | 1.101265 | 1.077777778 |
| Vim   | P20152 | 294  | SK(*)FADLSEAANR(*)             | K2  | 9.88  | 1000   | -         | 1.911392 | -           |
| Vim   | P20152 | 129  | NK(*)ILLAELEQLK(*)             | K2  | 9.58  | 187.15 | -         | -        | 1.188888889 |
| Prim1 | P20664 | 153  | EDFGFK(*)HR(*)                 | K6  | 53.18 | 1000   | 0.89      | 0.696629 | 1.094117    |
| Tpm3  | P21107 | 153  | EAK(*)HIAEEADR(*)              | K3  | 85.11 | 1000   | 0.8349514 | 0.807228 | 1.048192    |
| Gnaq  | P21279 | 52   | LLLLGTGESGK(*)STFIK(*)         | K11 | 72.94 | 60.87  | 0.7767857 | 0.662921 | 1           |
| Eno3  | P21550 | 28   | GNPTVEVDLHTAK(*)GR(*)          | K13 | 38.07 | 1000   | -         | 1.422535 | 0.905882    |
| Eno3  | P21550 | 71   | AVEHINK(*)TLGPALLEK(*)         | K7  | 31.03 | 100.79 | -         | 1.253521 | 0.764705    |
| Lmn2  | P21619 | 554  | AAK(*)HSSVQGR(*)               | K3  | 3.15  | 1000   | -         | -        | 0.106382979 |
| Mfge8 | P21956 | 234  | AEYLK(*)TFK(*)                 | K5  | 51.29 | 32.97  | 0.9801980 | 2.160493 | 1.287356    |
| Tgm2  | P21981 | 458  | EVFTK(*)ANHLNK(*)              | K5  | 18.09 | 102.87 | 1.4891304 | 1.731343 | 1.134831    |
| Ap1g1 | P22892 | 334  | YVALTSLK(*)TVQTDHNAVQR(*)      | K9  | 74.63 | 1000   | 0.9578947 | -        | 0.882978    |
| Ap1g1 | P22892 | 224  | ILK(*)NLIMSGYSPEHDVSGISDPFLQ\  | K3  | 19.21 | 1000   | -         | -        | 0.670212766 |
| Hmb3  | P22907 | 74   | IGEK(*)SLFTK(*)                | K4  | 63.72 | 38.19  | -         | -        | 0.893617021 |
| Hmb3  | P22907 | 70   | ILDALSK(*)IGEK(*)              | K8  | 40.06 | 46.31  | 0.6629213 | -        | 0.680851    |
| Hmb3  | P22907 | 132  | FIGK(*)TLETLPK(*)              | K4  | 24.28 | 98.53  | -         | 1.120689 | -           |
| Eif3a | P23116 | 409  | VTG(*)VLNWRV(*)                | K3  | 81.02 | 1000   | 0.7826086 | 0.769230 | 1.131868    |
| Eif3a | P23116 | 747  | ALEHK(*)NR(*)                  | K5  | 74.45 | 1000   | -         | 0.923076 | 0.945054    |
| Eif3a | P23116 | 559  | EEQHLAVNAYLK(*)NSR(*)          | K13 | 66.02 | 1000   | 0.9673913 | 0.833333 | 1.043956    |
| Eif3a | P23116 | 285  | VSTVFWK(*)SGNALFHASTLHR(*)     | K7  | 64.51 | 1000   | 0.9673913 | 0.884615 | 1.065934    |
| Eif3a | P23116 | 84   | IK(*)SLEDVVR(*)                | K2  | 60.98 | 1000   | 0.8260869 | 0.923076 | 1.032967    |
| Eif3a | P23116 | 1331 | TK(*)NETDEGWTTVR(*)            | K2  | 59.39 | 1000   | 0.7391304 | 0.833333 | 0.725274    |
| Eif3a | P23116 | 278  | K(*)PPK(*)PQLMANYYNK(*)VSTVFW  | K14 | 47.15 | 61.82  | -         | -        | 0.714285714 |
| Eif3a | P23116 | 278  | YYNK(*)VSTVFWK(*)              | K4  | 38.73 | 61.68  | -         | -        | 0.912087912 |
| Eif3a | P23116 | 84   | NIC(+57.02)QQVNIK(*)SLEDVVR(*) | K9  | 20.29 | 1000   | 1.1630434 | -        | -           |
| Eif3a | P23116 | 285  | WK(*)SGNALFHASTLHR(*)          | K2  | 16.77 | 1000   | 1.0978260 | -        | 0.857142    |
| Eif3a | P23116 | 711  | LEEIPLIK(*)SAYEEQR(*)          | K8  | 16.19 | 1000   | 0.9891304 | -        | 0.846153    |
| Eif3a | P23116 | 711  | R(*)LEEIPLIK(*)SAYEEQR(*)      | K9  | 11.69 | 1000   | -         | -        | 1.098901099 |
| Cbx3  | P23198 | 5    | A(+42.01)SNK(*)TTLQK(*)        | K4  | 89.89 | 98.37  | 0.5688073 | 0.805194 | 1.011904    |
| Cbx3  | P23198 | 44   | VVNGK(*)VEYFLK(*)              | K5  | 77.89 | 90.32  | 0.7798165 | 0.974025 | 0.976190    |

|         |        |     |                                 |     |       |        |           |          |          |           |
|---------|--------|-----|---------------------------------|-----|-------|--------|-----------|----------|----------|-----------|
| Cbx3    | P23198 | 5   | SNK(*)TTLQK(*)                  | K3  | 71.09 | 115.97 | -         | 0.948051 | 0.952380 | 0.9502165 |
| Gja1    | P23242 | 13  | LLDK(*)VQAYSTAGGK(*)            | K4  | 13.2  | 135.36 | 1.4636363 | -        | -        |           |
| Mov10   | P23249 | 509 | SLESNPEQLQAMK(*)HIVR(*)         | K13 | 39.64 | 1000   | 0.6237623 | -        | 1.126436 | 0.8750996 |
| Mov10   | P23249 | 71  | IANLAFVTK(*)TR(*)               | K9  | 28.19 | 1000   | 1.0594059 | -        | 1.367816 | 1.213611  |
| Mov10   | P23249 | 121 | AEYLHGK(*)HGVDVEVQGPHEAR(*)     | K7  | 27.25 | 1000   | 0.9405940 | -        | 0.712643 | 0.8266189 |
| Mov10   | P23249 | 847 | YC(+57.02)ITK(*)LDR(*)          | K5  | 9.77  | 1000   | -         | -        | 0.931034 | 4483      |
| Mov10   | P23249 | 696 | SPLALK(*)HGLGYSLLER(*)          | K6  | 8.77  | 1000   | -         | -        | 1.724137 | 931       |
| Pnp     | P23492 | 95  | FHMYEGYLSK(*)VTFPVR(*)          | K11 | 56.49 | 1000   | -         | -        | 0.579545 | 455       |
| Pnp     | P23492 | 244 | SLITNK(*)VVMDYENLEK(*)          | K6  | 45.01 | 183.74 | 0.8736842 | -        | 1.079545 | 0.9766148 |
| Pcmt1   | P23506 | 4   | A(+42.01)WK(*)SGGASHSELIHNLR(   | K3  | 89.18 | 1000   | 0.9892473 | 0.925    | 1.097560 | 1.0039361 |
| Pcmt1   | P23506 | 206 | MK(*)PLMGVIYVPLTDK(*)EK(*)      | K2  | 35.04 | 90.57  | -         | -        | 1.341463 | 415       |
| Pcmt1   | P23506 | 27  | TDK(*)VFEVMLATDR(*)             | K3  | 5.32  | 1000   | -         | -        | 1.292682 | 927       |
| Tsta3   | P23591 | 199 | VHLAK(*)SSDSALTVWGTGK(*)PR(*)   | K5  | 55.3  | 152.87 | 1.0361445 | 0.675324 | 0.858695 | 0.8567216 |
| Tsta3   | P23591 | 199 | VHLAK(*)SSDSALTVWGTGK(*)        | K5  | 45.24 | 166.43 | 0.7108433 | -        | 0.967391 | 0.8391173 |
| Glb1    | P23780 | 288 | TK(*)TLATSLYNLLAR(*)            | K2  | 7.23  | 1000   | -         | -        | 1.078125 |           |
| Pcgf2   | P23798 | 73  | SDK(*)TLQDIVYK(*)               | K3  | 31.01 | 183.32 | -         | -        | -        |           |
| Cryab   | P23927 | 103 | VLGDVIEVHGK(*)HEER(*)           | K11 | 65.12 | 1000   | 1.2105263 | 1.2      | 1.154761 | 1.1884294 |
| Zfp36l2 | P23949 | 157 | YK(*)TELC(+57.02)R(*)           | K2  | 86.14 | 1000   | 0.8       | 0.670454 | 1.085365 | 0.8519401 |
| Zfp36l2 | P23949 | 157 | YK(*)TELC(+57.02)R(*)PFEEGTC(+5 | K2  | 76.78 | 47.75  | 0.5473684 | -        | -        |           |
| Cat     | P24270 | 480 | AVK(*)NFTDVHPDYGAR(*)           | K3  | 61    | 1000   | 0.9784946 | 1.175675 | 1.036144 | 1.0634383 |
| Cat     | P24270 | 449 | TFYTK(*)VLNEEER(*)              | K5  | 59.06 | 1000   | 1.2688172 | -        | 1.301204 | 1.285011  |
| Cat     | P24270 | 237 | FHYK(*)TDQGIK(*)                | K4  | 46.18 | 109.28 | 1.5376344 | 1.391891 | 1.542168 | 1.490565  |
| Cat     | P24270 | 243 | TDQGIK(*)NLPVGEAGR(*)           | K6  | 42.46 | 1000   | -         | -        | 1.313253 | 012       |
| Bcat1   | P24288 | 215 | AWK(*)GGTGDC(+57.02)K(*)        | K3  | 40.15 | 110.43 | -         | -        | 0.956521 | 739       |
| Bcat1   | P24288 | 28  | AK(*)DLIITPATVLK(*)             | K2  | 34.59 | 156.9  | 0.5869565 | 1.353658 | 0.967391 | 0.9693355 |
| Ppib    | P24369 | 131 | LK(*)HYGPGWVSMANAGK(*)          | K2  | 88.68 | 300.97 | 0.9587628 | 0.962025 | 0.956043 | 0.9589441 |
| Ppib    | P24369 | 71  | TVPK(*)TVDNFVALATGEK(*)         | K4  | 84.74 | 137.95 | 0.7938144 | 0.873417 | 0.846153 | 0.8377953 |
| Ppib    | P24369 | 171 | HVVFGK(*)VLEGMDVVR(*)           | K6  | 78.54 | 1000   | 0.9793814 | 1.101265 | 1.021978 | 1.0342084 |
| Ppib    | P24369 | 186 | K(*)VESTK(*)TDSR(*)             | K6  | 75.28 | 98.37  | 0.7938144 | 1.531645 | 0.846153 | 1.0572046 |
| Ppib    | P24369 | 165 | TSWLDGK(*)HVVFGK(*)             | K7  | 74.26 | 135.5  | 1         | 0.987341 | 1        | 0.9957806 |
| Ppib    | P24369 | 116 | GDGTGGK(*)SIYGER(*)             | K7  | 72.91 | 1000   | 1.2268041 | 1.493670 | 1.087912 | 1.2694624 |
| Ppib    | P24369 | 67  | VVFGFLFGK(*)TVPK(*)             | K8  | 71.72 | 63.97  | 0.8659793 | 0.911392 | 0.945054 | 0.9074756 |
| Ppib    | P24369 | 89  | GFGYK(*)NSK(*)                  | K5  | 56.15 | 34.94  | 1.1752577 | 0.911392 | 0.813186 | 0.9666123 |
| Capg    | P24452 | 345 | ESPIFK(*)QFFK(*)                | K6  | 42.32 | 72.09  | 0.7553191 | -        | 0.921348 | 0.8383337 |

|        |        |      |                                 |     |       |        |           |          |             |           |
|--------|--------|------|---------------------------------|-----|-------|--------|-----------|----------|-------------|-----------|
| Capg   | P24452 | 349  | QFFK(*)NWK(*)                   | K4  | 40.08 | 44.44  | -         | 1.150684 | 1.011235    | 1.0809604 |
| Lta4h  | P24527 | 580  | DLAAFDK(*)SHDQAVHTYQEHK(*)      | K7  | 59.99 | 33.02  | 1.1505376 | 0.739726 | 1.088888    | 0.9930509 |
| Lta4h  | P24527 | 593  | SHDQAVHTYQEHK(*)ASMHPVTAML      | K13 | 42.35 | 1000   | -         | -        | 1.066666667 |           |
| Impdh2 | P24547 | 349  | PQATAVYK(*)VSEYAR(*)            | K8  | 91.01 | 1000   | 0.8453608 | 0.726190 | 0.876288    | 0.8159467 |
| Impdh2 | P24547 | 438  | IK(*)VAQGVSGAVQDK(*)            | K2  | 67.04 | 261.96 | 0.8247422 | 0.75     | 0.876288    | 0.8170103 |
| Impdh2 | P24547 | 422  | GMGSLDAMDK(*)HLSSQNR(*)         | K10 | 59.23 | 1000   | 1.2989690 | 0.976190 | 1.082474    | 1.1192113 |
| Impdh2 | P24547 | 474  | LIAGIQHSC(+57.02)QDIGAK(*)SLTQ  | K15 | 44.91 | 1000   | 1.2268041 | 0.797619 | 0.969072    | 0.9978318 |
| M6pr   | P24668 | 31   | IEEK(*)SC(+57.02)DLVGEK(*)      | K4  | 7.02  | 99.23  | -         | -        | 2.393258427 |           |
| Cdk11b | P24788 | 708  | INAEDGLK(*)HEYFR(*)             | K8  | 22.4  | 1000   | -         | -        | 1.513157895 |           |
| Cdk11b | P24788 | 120  | SHSAEGGK(*)HAR(*)               | K8  | 8.02  | 1000   | -         | 1.015873 | -           |           |
| Ccnb1  | P24860 | 405  | YAASK(*)HAK(*)                  | K5  | 16.52 | 39.3   | -         | -        | 1.11627907  |           |
| Mcm3   | P25206 | 293  | SK(*)DVFEQLAR(*)                | K2  | 62.41 | 1000   | -         | 0.790123 | 0.824175    | 0.8071496 |
| Mcm3   | P25206 | 547  | IYEK(*)HDSLLHGK(*)              | K4  | 47.12 | 143.22 | 1.04      | 0.864197 | 1.098901    | 1.0010329 |
| Rps2   | P25444 | 275  | SPYQEFTDHLVK(*)THTR(*)          | K12 | 95.99 | 1000   | 0.9489795 | 0.851851 | 0.978021    | 0.9262845 |
| Rps2   | P25444 | 263  | ETVFTK(*)SPYQEFTDHLVK(*)        | K6  | 88.6  | 99.65  | 0.8469387 | 0.753086 | 0.912087    | 0.837371  |
| Rps2   | P25444 | 65   | AEDK(*)EWIPVTK(*)LGR(*)         | K11 | 87.22 | 186.64 | 0.8061224 | 0.728395 | 0.901098    | 0.8118721 |
| Rps2   | P25444 | 65   | EWIPVTK(*)LGR(*)                | K7  | 67.69 | 1000   | 0.8061224 | 0.604938 | 0.912087    | 0.7743829 |
| Rps2   | P25444 | 173  | GYWGNK(*)IGK(*)                 | K6  | 47.68 | 42.6   | -         | -        | 1.340659341 |           |
| Rps2   | P25444 | 238  | GC(+57.02)TATLGNFAK(*)ATFDAISK  | K11 | 16.72 | 71.07  | -         | -        | 1.494505495 |           |
| Rps2   | P25444 | 176  | IGK(*)PHTVPC(+57.02)K(*)        | K3  | 13.55 | 48.8   | -         | -        | 1.054945055 |           |
| Nfkb1  | P25799 | 114  | SLVGK(*)HC(+57.02)EDGVC(+57.02  | K5  | 29.95 | 135.22 | 1.1754385 | 0.527027 | 1.147727    | 0.9500643 |
| Ubtf   | P25976 | 266  | DYIQK(*)HPELNISEEGITK(*)        | K5  | 58.01 | 90.21  | 0.8152173 | 0.740259 | 1.022988    | 0.8594885 |
| Ubtf   | P25976 | 47   | FK(*)TTESHMDWEK(*)              | K2  | 45.26 | 154.16 | 0.8260869 | 1.103896 | 1.114942    | 1.0149752 |
| Tln1   | P26039 | 1917 | PAAVAAENEEIGAHIK(*)HR(*)        | K16 | 92.72 | 1000   | 1.1578947 | 0.857142 | 0.902173    | 0.9724038 |
| Tln1   | P26039 | 284  | IFQAHK(*)NC(+57.02)GQMSEIEAK(*) | K6  | 87.71 | 187.15 | 0.9052631 | 0.753246 | 0.967391    | 0.8753004 |
| Tln1   | P26039 | 98   | MLDGTVK(*)TIMVDDSK(*)           | K7  | 83.45 | 127.58 | 0.9368421 | 0.870129 | 0.945652    | 0.9175414 |
| Tln1   | P26039 | 2115 | VGDDPAVWQLK(*)NSAK(*)           | K11 | 70.38 | 48.12  | 1.0736842 | 0.870129 | 0.565217    | 0.8363438 |
| Tln1   | P26039 | 1933 | VQELGHGC(+57.02)SALVTK(*)AGAL   | K14 | 46.38 | 179.71 | -         | 1.974025 | -           |           |
| Tln1   | P26039 | 406  | SK(*)DHFGLEGDEESTMLEDSVSPK(*)   | K2  | 41.29 | 89.97  | 1         | -        | -           |           |
| Tln1   | P26039 | 306  | SLK(*)TYGVSFLLVK(*)             | K3  | 40.37 | 158.16 | 0.7894736 | -        | 1.076086    | 0.9327803 |
| Tln1   | P26039 | 295  | NC(+57.02)GQMSEIEAK(*)VR(*)     | K11 | 38.94 | 1000   | 0.7789473 | -        | 1.130434    | 0.9546911 |
| Tln1   | P26039 | 164  | QK(*)LHTDDELNWLHDHGR(*)         | K2  | 35.83 | 1000   | 1.2       | 1.077922 | 1.119565    | 1.1324958 |
| Tln1   | P26039 | 2099 | ALGDLISATK(*)AAAGK(*)           | K10 | 34.74 | 48.54  | 1.6842105 | 1.857142 | 1.293478    | 1.6116105 |
| Tln1   | P26039 | 441  | VGK(*)VEHGSVALPAIMR(*)          | K3  | 33.43 | 1000   | 2.0631578 | -        | 0.967391    | 1.5152746 |



|        |        |      |                                     |       |        |           |           |                             |
|--------|--------|------|-------------------------------------|-------|--------|-----------|-----------|-----------------------------|
| Tln1   | P26039 | 15   | ISIGNVVK(*)TMQFEPSTMVYDAC(+5` K8    | 22.94 | 1000   | -         | -         | 0.989130435                 |
| Tln1   | P26039 | 1306 | AQVVSNLK(*)GISMSSSK(*)              | K8    | 20.81  | 68.3      | 0.7578947 | 1.181818 0.673913(0.8712087 |
| Ezr    | P26040 | 143  | EMHK(*)SGYLSSER(*)                  | K4    | 70.41  | 1000      | 0.8333333 | 0.918918 0.947368(0.8998736 |
| Msn    | P26041 | 296  | R(*)K(*)PDTIEVQQMK(*)               | K2    | 85.11  | 116.35    | -         | - 0.3                       |
| Msn    | P26041 | 3    | PK(*)TISVR(*)                       | K2    | 84.29  | 1000      | -         | 0.728395 -                  |
| Msn    | P26041 | 35   | QLFDQVVK(*)TIGLR(*)                 | K8    | 84.03  | 1000      | 0.8315789 | 0.604938 1.033333(0.8232835 |
| Msn    | P26041 | 237  | LTPK(*)IGFPWSEIR(*)                 | K4    | 72.02  | 1000      | -         | 0.370370 0.9 0.6351852      |
| Msn    | P26041 | 143  | EVHK(*)SGYLAGDK(*)                  | K4    | 58.87  | 118.18    | 0.9789473 | 0.950617 0.966666(0.9654104 |
| Msn    | P26041 | 162  | VLEQHK(*)LNN(*)                     | K6    | 32.47  | 77.24     | 1.1368421 | 1.234567 1.277777(1.2163959 |
| Rdx    | P26043 | 165  | LTK(*)EQWEER(*)                     | K3    | 74.24  | 1000      | 0.8297872 | 0.987179 0.911111(0.9093593 |
| Rdx    | P26043 | 35   | QLFDQVVK(*)TVGLR(*)                 | K8    | 15.54  | 1000      | -         | - 1.933333333               |
| Ctnna1 | P26231 | 737  | GPLK(*)NTSDVISAAC(*)                | K4    | 59.44  | 140.01    | 0.6969696 | 0.392405 0.736263(0.6085462 |
| U2af2  | P26369 | 413  | YGLVK(*)SIEIPR(*)PVDGVEVPGC(+5 K5   | 42.34 | 107.2  | 0.6428571 | 0.576923  | 0.977528(0.7324361          |
| U2af2  | P26369 | 413  | YGLVK(*)SIEIPR(*)                   | K5    | 20.24  | 1000      | -         | 1.128205 1.044943(1.0865745 |
| U2af2  | P26369 | 462  | VVVT(*)YC(+57.02)DPDSYHR(*)         | K5    | 16.45  | 1000      | 0.5714285 | 1.858974 1.561797(1.3307336 |
| Glud1  | P26443 | 480  | FGK(*)HGGTIPVPTAEFQDR(*)            | K3    | 95.73  | 1000      | 0.9489795 | 0.827160 1.054945(0.943695  |
| Glud1  | P26443 | 191  | INPK(*)NYTDNELEK(*)                 | K4    | 79.31  | 85.33     | -         | 0.827160 0.912087(0.8696242 |
| Psmc7  | P26516 | 204  | GLNSK(*)LLDIR(*)                    | K5    | 87.56  | 1000      | 0.8736842 | 0.924050 0.977777(0.9251709 |
| Psmc7  | P26516 | 103  | LHK(*)NDIAINELMK(*)                 | K3    | 76.77  | 135.36    | 0.8421052 | 0.784810 1.033333(0.8867496 |
| Psmc7  | P26516 | 199  | ITNQVHGLK(*)GLNSK(*)                | K9    | 67.01  | 86.16     | 1.2105263 | 0.886075 1.033333(1.0433119 |
| Psmc7  | P26516 | 279  | SVVALHNLINNK(*)IANR(*)              | K12   | 53.4   | 1000      | 1.2       | - 0.977777(1.0888889        |
| Sars   | P26638 | 62   | NLC(+57.02)SK(*)TIGEK(*)            | K5    | 52.7   | 54.46     | 0.5555555 | - 0.772727(0.6641414        |
| Sars   | P26638 | 323  | VHQFEK(*)IEQFVYSSPHDNK(*)           | K6    | 40.62  | 163.91    | -         | - 1.227272727               |
| Sars   | P26638 | 419  | MMDK(*)VEFVHMLNATMC(+57.02) K4      | 7.36  | 1000   | -         | -         | 2.045454545                 |
| Fkbp1a | P26883 | 53   | FTLGK(*)QEVR(*)                     | K5    | 92.36  | 1000      | 0.97      | 0.948717 0.842696(0.9204715 |
| Man2a1 | P27046 | 190  | DK(*)TQYIFNNMVLK(*)                 | K2    | 85.95  | 281.19    | 0.8210526 | 0.759493 0.902173(0.8275734 |
| Man2a1 | P27046 | 416  | TK(*)VLLAPLGDDFR(*)                 | K2    | 85.33  | 1000      | 0.7789473 | 0.708860 0.869565(0.7857911 |
| Man2a1 | P27046 | 849  | IYSDVTC(+57.02)FLEHVTHK(*)VR(*) K15 | 54.61 | 1000   | 0.7684210 | -         | 0.989130(0.8787757          |
| Man2a1 | P27046 | 975  | GLGQGVHDNK(*)ITANLFR(*)             | K10   | 51.36  | 1000      | 0.6842105 | - 0.858695(0.7714531        |
| Man2a1 | P27046 | 1064 | MGK(*)GYSDEAALILHR(*)               | K3    | 39.12  | 1000      | 1.8210526 | - 1 1.4105263               |
| Man2a1 | P27046 | 886  | ISSK(*)INNQNR(*)                    | K4    | 10.05  | 1000      | -         | 1.227848 -                  |
| Snrpb  | P27048 | 36   | AFDK(*)HMNLILC(+57.02)DC(+57.0 K4   | 80.88 | 1000   | 1.25      | -         | 0.926315(1.0881579          |
| Snrpb  | P27048 | 32   | IFIGTFK(*)AFDK(*)                   | K7    | 58.07  | 72.65     | 0.84      | 0.719512 0.915789(0.8251006 |
| Snrpb  | P27048 | 36   | AFDK(*)HMNLILC(+57.02)DC(+57.0 K4   | 51.32 | 135.22 | 0.96      | 0.780487  | 1.336842(1.0257766          |

|       |        |     |                                   |     |       |        |           |          |          |           |
|-------|--------|-----|-----------------------------------|-----|-------|--------|-----------|----------|----------|-----------|
| Map4  | P27546 | 825 | MTAK(*)SASADLSR(*)                | K4  | 64.05 | 1000   | 0.8351648 | -        | 0.976744 | 0.9059545 |
| Map4  | P27546 | 988 | DNIK(*)HVPGGGNVQIQNK(*)           | K4  | 36.09 | 207.86 | 0.7802197 | 1.424657 | 1.290697 | 1.1651917 |
| Map4  | P27546 | 911 | SK(*)VGSTENIK(*)                  | K2  | 27.85 | 86.34  | -         | -        | 1.081395 | 349       |
| Gna13 | P27601 | 61  | ILLLGAGESGK(*)STFLK(*)            | K11 | 48.6  | 60.87  | -         | -        | 1.569620 | 253       |
| Plaa  | P27612 | 259 | IWK(*)HGEC(+57.02)AQ TIR(*)       | K3  | 65.26 | 1000   | 0.9897959 | 0.924050 | 1.052631 | 0.988826  |
| Plaa  | P27612 | 622 | LSIK(*)HPNVNENFC(+57.02)NEK(*)    | K4  | 50.38 | 91.71  | 1.0816326 | 0.658227 | 0.905263 | 0.8817079 |
| Plaa  | P27612 | 244 | SK(*)DFVTTAEDR(*)                 | K2  | 17.72 | 1000   | -         | -        | 0.410526 | 316       |
| Plaa  | P27612 | 690 | ESLM SHAIELK(*)SGSNK(*)           | K11 | 15.35 | 30.64  | -         | -        | 1.284210 | 526       |
| Plaa  | P27612 | 651 | GK(*)PANQLLALR(*)                 | K2  | 10.11 | 1000   | -         | -        | 1.178947 | 368       |
| Xrcc5 | P27641 | 265 | IVAYK(*)SIVQEK(*)                 | K5  | 58.02 | 76.27  | 1.0439560 | -        | 0.939024 | 0.9914902 |
| Xrcc5 | P27641 | 534 | VK(*)TLFPLTEVIK(*)                | K2  | 45.59 | 140.72 | 0.7252747 | -        | 0.670731 | 0.6980032 |
| Rpl3  | P27659 | 300 | LIK(*)NNASTDYDLSDK(*)             | K3  | 98.57 | 287.12 | 0.8877551 | 0.822784 | 0.947916 | 0.8861522 |
| Rpl3  | P27659 | 120 | FYK(*)NWHK(*)                     | K3  | 92.98 | 64.94  | 0.8163265 | 0.784810 | 0.84375  | 0.8149622 |
| Rpl3  | P27659 | 286 | IYK(*)IGQGYLIK(*)                 | K3  | 90.33 | 171.49 | -         | 0.772151 | 0.9375   | 0.8548259 |
| Rpl3  | P27659 | 103 | TFK(*)TVFAEHISDEC(+57.02)K(*)     | K3  | 86.91 | 310.88 | 0.9285714 | 0.772151 | 0.864583 | 0.8551022 |
| Rpl3  | P27659 | 50  | LGYK(*)AGMTHIVR(*)                | K4  | 71.79 | 1000   | 0.9183673 | 0.784810 | 0.885416 | 0.8628647 |
| Rpl3  | P27659 | 50  | DDASK(*)PVHLTAFLGYK(*)AGMTHI      | K16 | 57.29 | 159.14 | 1.1734693 | -        | 0.78125  | 0.9773597 |
| Rpl3  | P27659 | 272 | AGQK(*)GYHHR(*)                   | K4  | 48.73 | 1000   | 0.9591836 | -        | -        |           |
| Rpl3  | P27659 | 103 | TFK(*)TVFAEHISDEC(+57.02)K(*)R(*) | K3  | 45.59 | 186.68 | 0.7448979 | -        | 0.895833 | 0.8203656 |
| Pdia3 | P27773 | 366 | YLK(*)SEPIPESNEGPVK(*)            | K3  | 96.49 | 178.45 | 0.7920792 | 0.768292 | 0.831578 | 0.7973169 |
| Pdia3 | P27773 | 218 | FEDK(*)TVAYTEK(*)                 | K4  | 96.48 | 170.44 | 0.8811881 | 0.890243 | 0.947368 | 0.9062668 |
| Pdia3 | P27773 | 82  | AK(*)VDC(+57.02)TANTNTC(+57.02    | K2  | 82.27 | 323.97 | 0.8217821 | 0.695121 | 0.947368 | 0.8214242 |
| Pdia3 | P27773 | 104 | YGVSGYPTLK(*)IFR(*)               | K10 | 78.87 | 1000   | 0.7821782 | 1        | 1.305263 | 1.0291471 |
| Pdia3 | P27773 | 274 | NAK(*)GSNYWR(*)                   | K3  | 55.84 | 1000   | 0.9108910 | 1.146341 | 1.326315 | 1.1278494 |
| Pdia3 | P27773 | 82  | GIVPLAK(*)VDC(+57.02)TANTNTC(+    | K7  | 44.09 | 101.74 | 0.9108910 | 1.853658 | 1.042105 | 1.268885  |
| Braf  | P28028 | 607 | QTAQGM DY LHAK(*)SIIHR(*)         | K12 | 15.28 | 1000   | -         | -        | 0.6      |           |
| Aco1  | P28271 | 621 | IETV NK(*)SWNALAAPSEK(*)          | K6  | 17.85 | 122.88 | -         | 1.955882 | 1.428571 | 1.6922269 |
| Aco1  | P28271 | 266 | PHPLVTSTDIVLTITK(*)HLR(*)         | K16 | 13.24 | 1000   | -         | -        | 1.226190 | 476       |
| Lox   | P28301 | 314 | VAEGHK(*)ASFC(+57.02)LED TSC(+5   | K6  | 40.81 | 1000   | 3.2574257 | -        | 1.238636 | 2.2480311 |
| Lox   | P28301 | 264 | VK(*)NQGTSDFLPSR(*)               | K2  | 40.66 | 1000   | 1.0990099 | 0.776315 | 0.761363 | 0.8788964 |
| Lox   | P28301 | 264 | VK(*)NQGTSDFLPSR(*)PR(*)          | K2  | 29.18 | 1000   | 0.4950495 | -        | -        |           |
| Apex1 | P28352 | 62  | SATLK(*)IC(+57.02)SWNV DGLR(*)    | K5  | 70.75 | 1000   | -         | -        | 0.786516 | 854       |
| Adh5  | P28474 | 107 | FC(+57.02)LNPK(*)TNLC(+57.02)Q    | K6  | 78.9  | 71.75  | 0.7840909 | 0.75     | 0.906976 | 0.8136892 |
| Adh5  | P28474 | 323 | GTAFGGWK(*)SVESVPK(*)             | K8  | 67.24 | 136.94 | 1.1022727 | -        | 1.197674 | 1.1499736 |

|        |        |     |                                 |     |       |        |           |          |          |           |
|--------|--------|-----|---------------------------------|-----|-------|--------|-----------|----------|----------|-----------|
| Nap1l1 | P28656 | 82  | VNALK(*)NLQVK(*)                | K5  | 97.94 | 127.18 | 0.8764044 | 0.935064 | 0.929411 | 0.9136271 |
| Nap1l1 | P28656 | 82  | R(*)VNALK(*)NLQVK(*)            | K6  | 95.66 | 107.29 | 0.9887640 | 0.974025 | 1.011764 | 0.9915182 |
| Nap1l1 | P28656 | 116 | YAVLYQPLFDK(*)R(*)              | K11 | 44.61 | 1000   | 1.0561797 | 1.233766 | 0.788235 | 1.0260604 |
| Nap1l1 | P28656 | 116 | K(*)YAVLYQPLFDK(*)R(*)          | K12 | 43.85 | 127.06 | 0.9775280 | -        | 0.870588 | 0.9240582 |
| Nap1l1 | P28656 | 266 | GK(*)NVTLK(*)                   | K2  | 20.83 | 119.54 | 1.0561797 | -        | 1.176470 | 1.1163252 |
| Nap1l1 | P28656 | 271 | NVTLK(*)TIK(*)                  | K5  | 8.54  | 32.69  | -         | -        | 1.329411 | 1.765     |
| Atxn10 | P28658 | 384 | LIGNLC(+57.02)YK(*)NK(*)        | K8  | 85.73 | 24.32  | -         | 0.784810 | 0.888888 | 0.8368495 |
| Atxn10 | P28658 | 371 | AEGDIEHMTGFK(*)SHLIR(*)         | K13 | 71.26 | 1000   | 1.1052631 | 0.924050 | 1.377777 | 1.1356972 |
| Nckap1 | P28660 | 501 | LQAYTSVSK(*)ASLSLADHR(*)        | K9  | 29.48 | 1000   | 1.5384615 | 0.986842 | 1.204545 | 1.243283  |
| Kif2a  | P28740 | 101 | TVAAVK(*)NDPPPR(*)              | K6  | 67.01 | 1000   | 0.9038461 | 0.598039 | 0.744444 | 0.7487766 |
| Kif2a  | P28740 | 482 | LEGAEINK(*)SLLALK(*)            | K8  | 38.03 | 104.62 | -         | -        | 0.844444 | 0.444444  |
| Pabpc1 | P29341 | 104 | SGVGNIFIK(*)NLDK(*)             | K9  | 93.52 | 72.09  | 0.8958333 | 0.925    | 0.989247 | 0.9366935 |
| Pabpc1 | P29341 | 231 | SK(*)GFGFVSFER(*)               | K2  | 85.75 | 1000   | 0.7916666 | 0.775    | 0.903225 | 0.8232975 |
| Pabpc1 | P29341 | 299 | VK(*)NLDDGIDDER(*)              | K2  | 83.32 | 1000   | 0.8541666 | 0.8375   | 0.903225 | 0.8649642 |
| Pabpc1 | P29341 | 606 | SK(*)VDEAVAVLQAHQAK(*)          | K2  | 70.46 | 174.34 | 0.7916666 | 0.825    | 0.870967 | 0.8292115 |
| Pabpc1 | P29341 | 333 | SK(*)GFGFVC(+57.02)FSSPEEATK(*) | K2  | 67.26 | 238.57 | -         | -        | 0.849462 | 0.366     |
| Pabpc1 | P29341 | 108 | NLDK(*)SIDNK(*)                 | K4  | 62.52 | 33.54  | 0.8958333 | -        | -        | -         |
| Pabpc1 | P29341 | 104 | IFIK(*)NLDK(*)                  | K4  | 36.04 | 68.07  | -         | 0.9      | -        | -         |
| Pabpc1 | P29341 | 138 | VVC(+57.02)DENGSK(*)GYGFVHFET   | K9  | 32.9  | 1000   | -         | -        | 1.784946 | 0.237     |
| Pabpc1 | P29341 | 196 | IK(*)NFGEDMDDER(*)              | K2  | 32.4  | 1000   | 0.9583333 | -        | 1.709677 | 1.3340054 |
| Pabpc1 | P29341 | 104 | K(*)SGVGNIFIK(*)NLDK(*)         | K10 | 11.86 | 49.79  | 1.4479166 | -        | -        | -         |
| Vcam1  | P29533 | 171 | QEFSSSEEMTK(*)SLETK(*)          | K10 | 38.46 | 32.32  | -         | -        | 1.285714 | 0.286     |
| Oat    | P29758 | 66  | GK(*)GIYMWVDVEGR(*)             | K2  | 79.87 | 1000   | 0.7961165 | 0.777777 | 1.021978 | 0.8652908 |
| Oat    | P29758 | 374 | GK(*)GLLNAIVIR(*)               | K2  | 65.85 | 1000   | 0.7766990 | 0.604938 | -        | 0.6908187 |
| Oat    | P29758 | 392 | DC(+57.02)DAWK(*)VC(+57.02)LR(  | K6  | 41.34 | 1000   | -         | 1.518518 | -        | -         |
| Vtn    | P29788 | 222 | TYLFK(*)GSQYWR(*)               | K5  | 15.55 | 1000   | -         | 0.259259 | 0.625    | 0.4421296 |
| Tead1  | P30051 | 370 | LK(*)HLPEK(*)                   | K2  | 36.28 | 72.78  | -         | 7.928571 | -        | -         |
| Cdk4   | P30285 | 35  | DPHSGHFVALK(*)SVR(*)            | K11 | 73.79 | 1000   | 1.0543478 | 1.026315 | 0.922222 | 1.0009619 |
| Ppic   | P30412 | 83  | GYGYK(*)GSIFHR(*)               | K5  | 73.91 | 1000   | 1.0978260 | 0.854166 | 1.172413 | 1.0414688 |
| Ppic   | P30412 | 159 | PTWLDGK(*)HVVFGK(*)             | K7  | 60.04 | 134.33 | 1.1630434 | 0.6875   | 1.022988 | 0.957844  |
| Ppic   | P30412 | 159 | TK(*)PTWLDGK(*)HVVFGK(*)        | K9  | 56.28 | 55.13  | 0.8695652 | 0.614583 | 0.965517 | 0.8165553 |
| Fkbp4  | P30416 | 287 | YK(*)QALLQYK(*)                 | K2  | 93.15 | 163.4  | 0.9270833 | 0.9      | 0.913043 | 0.9133756 |
| Fkbp4  | P30416 | 390 | AAK(*)TQLAVC(+57.02)QQR(*)      | K3  | 90.66 | 1000   | 0.8958333 | 0.8125   | 0.934782 | 0.8810386 |
| Fkbp4  | P30416 | 354 | ALELDSNNEK(*)GLFR(*)            | K10 | 85.19 | 1000   | 0.9895833 | 0.8625   | 0.891304 | 0.9144626 |

|        |        |     |                                 |     |       |        |           |          |          |           |
|--------|--------|-----|---------------------------------|-----|-------|--------|-----------|----------|----------|-----------|
| Fkbp4  | P30416 | 222 | GEHSIVYLK(*)PSYAFGSVGK(*)       | K9  | 85.07 | 168.06 | 0.8854166 | -        | 0.902173 | 0.8937953 |
| Fkbp4  | P30416 | 378 | ADFQK(*)VLQLYPSNK(*)            | K5  | 64.44 | 181.94 | 0.8333333 | 0.775    | 0.967391 | 0.8585749 |
| Fkbp4  | P30416 | 108 | VEVC(+57.02)HITC(+57.02)K(*)PE  | K10 | 56.42 | 178.91 | 1.25      | 1.0125   | 1.032608 | 1.0983696 |
| Hmgb2  | P30681 | 50  | WK(*)TMSAK(*)                   | K2  | 89.99 | 76.42  | 1.1931818 | 1.169014 | 1.035714 | 1.1326367 |
| Hmgb2  | P30681 | 114 | IK(*)IEHPGLSIGDTAK(*)           | K2  | 86.49 | 246.23 | 0.9659090 | 1.014084 | 0.904761 | 0.9615852 |
| Hmgb2  | P30681 | 12  | GK(*)MSSYAFFVQTC(+57.02)R(*)    | K2  | 83.49 | 1000   | 1.1931818 | 0.887323 | 1.023809 | 1.0347718 |
| Hmgb2  | P30681 | 12  | GK(*)MSSYAFFVQTC(+57.02)R(*)EEI | K2  | 43.31 | 90.71  | 1.3181818 | -        | 0.845238 | 1.08171   |
| Hmgb2  | P30681 | 3   | GK(*)GDPNK(*)PR(*)              | K2  | 24.99 | 115.97 | 0.8295454 | -        | -        | -         |
| Ctnnd1 | P30999 | 810 | LVLINK(*)SGNR(*)                | K6  | 79.25 | 1000   | 0.9387755 | 0.807692 | 1.011363 | 0.9192772 |
| Ctnnd1 | P30999 | 383 | LDVVK(*)SNAAAYLQHLC(+57.02)YR   | K5  | 60.57 | 1000   | 0.8061224 | 0.448717 | 0.977272 | 0.7440377 |
| Ctnnd1 | P30999 | 433 | EVHLGAC(+57.02)GALK(*)NISFGR(*) | K11 | 57.23 | 1000   | 0.9081632 | 0.820512 | 1.079545 | 0.9360738 |
| Ctnnd1 | P30999 | 433 | K(*)EVHLGAC(+57.02)GALK(*)NISF  | K12 | 56.46 | 73.38  | 0.5612244 | 0.858974 | 0.795454 | 0.7385511 |
| Ctnnd1 | P30999 | 448 | IAIK(*)NC(+57.02)DGVPALVR(*)    | K4  | 56.41 | 1000   | 1.0816326 | 1.525641 | -        | 1.3036368 |
| Ctnnd1 | P30999 | 749 | ELIGK(*)HAIPNLVK(*)             | K5  | 41.76 | 161.77 | 0.8265306 | 0.743589 | 0.943181 | 0.8377674 |
| Ctnnd1 | P30999 | 146 | VVK(*)TMTTR(*)                  | K3  | 23.38 | 1000   | -         | 1.076923 | 1.329545 | 1.2032343 |
| Ctnnd1 | P30999 | 146 | K(*)VVK(*)TMTTR(*)              | K4  | 10.36 | 68.31  | 1.0510204 | -        | -        | -         |
| Hoxc10 | P31257 | 195 | TEHLESPQLGGK(*)VSFPETPK(*)      | K12 | 65.02 | 131.34 | -         | -        | -        | -         |
| Rbpj   | P31266 | 80  | GDQTVLILHAK(*)VAQK(*)           | K11 | 62.62 | 63.97  | 1.2386363 | 0.650602 | 0.863157 | 0.9174656 |
| Rbpj   | P31266 | 201 | QSLK(*)NADLC(+57.02)IASGTK(*)   | K4  | 30.09 | 112.13 | 4.1590909 | 6.891566 | -        | 5.5253286 |
| Rbpj   | P31266 | 84  | VAQK(*)SYGNEK(*)                | K4  | 5.6   | 22.09  | 1.2045454 | -        | -        | -         |
| Akt1   | P31750 | 163 | GTFGK(*)VILVK(*)                | K5  | 35.42 | 87.95  | 0.6041666 | 1.513157 | 1.064516 | 1.0606136 |
| Akt1   | P31750 | 30  | YFLK(*)NDGTFIGYK(*)             | K5  | 6.61  | 46.57  | 0.8854166 | -        | 1.591397 | 1.2384073 |
| Dbi    | P31786 | 55  | AK(*)WDSWKN(*)                  | K2  | 98.49 | 151.86 | 0.8723404 | 0.881578 | 1.229885 | 0.9946015 |
| Dbi    | P31786 | 17  | LK(*)TQPTDEEMLFYSHFK(*)         | K2  | 69.07 | 276.92 | 0.8723404 | 1.052631 | 0.988505 | 0.9711593 |
| Dbi    | P31786 | 33  | FK(*)QATVGDVNTDR(*)PGLLDLK(*)   | K2  | 66.18 | 74.24  | -         | -        | 0.885057 | 0.7471    |
| Dbi    | P31786 | 8   | S(+42.01)QAEFDK(*)AAEEVK(*)R(*) | K7  | 58.38 | 108.94 | -         | 0.789473 | 1.011494 | 0.900484  |
| Dbi    | P31786 | 51  | PGLLDLK(*)GK(*)                 | K7  | 24.78 | 39.76  | 0.7446808 | 0.947368 | 1.022988 | 0.9050126 |
| Ssb    | P32067 | 404 | DR(*)EEPASK(*)HK(*)             | K8  | 87.75 | 45.01  | 0.9479166 | 0.848101 | 0.932584 | 0.9095341 |
| Ssb    | P32067 | 148 | TLHK(*)TFK(*)                   | K4  | 73.7  | 44.44  | 0.2916666 | -        | 0.606741 | 0.4492041 |
| Ssb    | P32067 | 340 | FK(*)GSHVFTAAR(*)               | K2  | 67.34 | 1000   | 0.9166666 | 0.759493 | 0.932584 | 0.8695815 |
| Ssb    | P32067 | 356 | GK(*)GNR(*)PGYAGAPK(*)          | K2  | 66.68 | 112.13 | 0.90625   | 0.797468 | 1.202247 | 0.9686552 |
| Ssb    | P32067 | 176 | YK(*)DTNLLILFK(*)               | K2  | 43.88 | 181.07 | 0.90625   | -        | 0.764044 | 0.8351475 |
| Ssb    | P32067 | 228 | ALEGK(*)MGC(+57.02)LLK(*)       | K5  | 26.58 | 54.91  | -         | -        | 0.415730 | 0.337     |
| Ssb    | P32067 | 105 | SPSR(*)PLPEVTDEYK(*)NDVK(*)     | K14 | 22.11 | 25.11  | 0.7604166 | 1.025316 | -        | 0.8928666 |

|          |        |     |                                 |     |       |        |           |          |             |           |
|----------|--------|-----|---------------------------------|-----|-------|--------|-----------|----------|-------------|-----------|
| Ssb      | P32067 | 303 | VTWK(*)VLEGHAEK(*)              | K4  | 8.14  | 107.73 | -         | 0.493670 | 0.808988    | 0.6513298 |
| Drg1     | P32233 | 61  | GGGGGGPGEFDDVAK(*)TGDAK(*)      | K15 | 37.5  | 1000   | 0.5918367 | 0.987804 | -           | 0.7898208 |
| Serpinc1 | P32261 | 124 | AMTK(*)LGAC(+57.02)NDTLK(*)     | K4  | 2.6   | 148.12 | 1.5       | 0        | 0.4         | 0.6333333 |
| Kras     | P32883 | 88  | AINNTK(*)SFEDIHHYR(*)           | K6  | 45.52 | 1000   | -         | -        | 1.0875      |           |
| Wars     | P32921 | 260 | IQK(*)HVTFNQVK(*)               | K3  | 85.29 | 139.75 | 0.8541666 | 0.740259 | 0.945652    | 0.8466929 |
| Wars     | P32921 | 115 | LIVQFGSSK(*)IDK(*)              | K9  | 47.06 | 49.37  | -         | -        | 0.97826087  |           |
| Wars     | P32921 | 55  | MSYK(*)AAMGEEYK(*)              | K4  | 19.75 | 135.81 | -         | -        | 1.760869565 |           |
| Kif4     | P33174 | 884 | ILVSK(*)LESSLNQSK(*)            | K5  | 39.14 | 142.42 | -         | -        | 0.719101124 |           |
| Kif4     | P33174 | 893 | LESSLNQSK(*)ASC(+57.02)IDVQK(*) | K9  | 35.89 | 83.15  | -         | -        | 1.134831461 |           |
| Pola1    | P33609 | 665 | VPYWSK(*)JGR(*)                 | K6  | 38.17 | 1000   | 0.8333333 | -        | 0.843373    | 0.8383534 |
| Pola1    | P33609 | 385 | THVSC(+57.02)C(+57.02)VMVK(*)N  | K10 | 33.74 | 1000   | 2.09375   | -        | 1.746987    | 1.920369  |
| Pola1    | P33609 | 277 | VDEK(*)PVTAK(*)TWDQETEPVER(*)   | K9  | 22.08 | 38.19  | 1.5104166 | 1.267605 | -           | 1.3890112 |
| Pola2    | P33611 | 500 | VLK(*)HILTQR(*)                 | K3  | 76.39 | 1000   | 1.1927710 | 0.935897 | 0.844036    | 0.9909017 |
| Ranbp1   | P34022 | 134 | AWVWNTHADFADEC(+57.02)PK(*)     | K16 | 60.27 | 1000   | -         | -        | 0.795454545 |           |
| Ranbp1   | P34022 | 111 | IC(+57.02)ANHYITPMELK(*)PNAC    | K14 | 24.69 | 1000   | -         | -        | 1.897727273 |           |
| Ranbp1   | P34022 | 97  | TLK(*)IC(+57.02)ANHYITPMELK(*)  | K3  | 12.22 | 100.98 | -         | -        | 1.715909091 |           |
| Ranbp1   | P34022 | 154 | TK(*)FEEC(+57.02)R(*)           | K2  | 7     | 1000   | -         | 3.311688 | -           |           |
| Ptk2     | P34152 | 78  | VK(*)HVAC(+57.02)YGFR(*)        | K2  | 31.71 | 1000   | 1.1274509 | 1.064102 | 1.011235    | 1.0675965 |
| Mif      | P34884 | 78  | NYSK(*)LLC(+57.02)GLLSDR(*)     | K4  | 96.62 | 1000   | 0.9285714 | 0.917808 | 0.946236    | 0.9308721 |
| Mif      | P34884 | 67  | SGTNDPC(+57.02)ALC(+57.02)SLH   | K17 | 37.78 | 1000   | 1         | 1.931506 | -           | 1.4657534 |
| Usp4     | P35123 | 232 | QSLQSK(*)SSTAPSR(*)             | K6  | 14.62 | 1000   | -         | -        | 0.924731183 |           |
| Ptpn11   | P35235 | 280 | YK(*)NILPFDHTR(*)               | K2  | 64.43 | 1000   | -         | -        | 0.742268041 |           |
| Ptpn11   | P35235 | 35  | PSK(*)SNPGDFTLSVR(*)            | K3  | 37.78 | 1000   | -         | 0.891566 | 0.783505    | 0.8375357 |
| Ptpn11   | P35235 | 492 | GVDC(+57.02)DIDVPK(*)TIQMVR(*)  | K10 | 36.67 | 1000   | 1.1313131 | 1.012048 | 0.814432    | 0.9859314 |
| Ptpn11   | P35235 | 131 | GK(*)HGSFLVR(*)                 | K2  | 17.79 | 1000   | 2.7777777 | 2.795180 | 2.721649    | 2.7648693 |
| Rab5c    | P35278 | 184 | K(*)LPK(*)NEPQNAAGAPGR(*)       | K4  | 79.87 | 26.52  | 0.7021276 | 0.727272 | 0.829787    | 0.7530625 |
| Rab5c    | P35278 | 34  | LVLGESAAGK(*)SSLVLR(*)          | K11 | 65.82 | 1000   | 0.6595744 | -        | 0.829787    | 0.7446809 |
| Rab5c    | P35278 | 135 | IVIALAGNK(*)ADLASK(*)           | K9  | 51.16 | 102.87 | 0.5638297 | 0.961038 | 1           | 0.8416229 |
| Rab5c    | P35278 | 184 | LPK(*)NEPQNAAGAPGR(*)           | K3  | 19.45 | 1000   | -         | 94.74025 | 1.095744    | 47.918002 |
| Rab21    | P35282 | 45  | FNDK(*)HITTLQASFLTK(*)          | K4  | 79.61 | 143.73 | 0.8105263 | 0.741176 | 0.860465    | 0.804056  |
| Rab21    | P35282 | 30  | VVLLGEGC(+57.02)VGK(*)TSLVLR(*) | K11 | 57.15 | 1000   | 0.8842105 | 0.529411 | 1.058139    | 0.8239206 |
| Rab12    | P35283 | 54  | GVGK(*)TSLMER(*)                | K4  | 6.33  | 1000   | 2.0865384 | 1.031578 | 1.522935    | 1.5470177 |
| Rab24    | P35290 | 20  | EYVGK(*)TSLVER(*)               | K5  | 34.37 | 1000   | 1.0921052 | 0.785046 | 1.508196    | 1.1284496 |
| Rab18    | P35293 | 48  | VK(*)TISVDGNK(*)                | K2  | 84.67 | 170.86 | 0.7352941 | 0.688311 | 0.931818    | 0.7851413 |





|       |        |     |                                    |     |       |        |           |           |             |
|-------|--------|-----|------------------------------------|-----|-------|--------|-----------|-----------|-------------|
| Fmr1  | P35922 | 310 | LIQEIVDK(*)SGVVR(*)                | K8  | 42.58 | 1000   | -         | -         | 0.795454545 |
| Fmr1  | P35922 | 195 | TK(*)LSLILR(*)                     | K2  | 39.65 | 1000   | -         | -         | 0.636363636 |
| Fmr1  | P35922 | 371 | ENTHFSQPNSTK(*)VQR(*)              | K12 | 26.95 | 1000   | -         | -         | 1.159090909 |
| Rpl12 | P35979 | 54  | ATGDWK(*)GLR(*)                    | K6  | 95.3  | 1000   | 0.9230769 | 0.630952  | 0.863636363 |
| Rpl12 | P35979 | 99  | NIK(*)HSGNITFDEIVNIAR(*)           | K3  | 61.6  | 1000   | 1.2857142 | -         | 1.056818181 |
| Rpl18 | P35980 | 99  | LK(*)VC(+57.02)ALR(*)              | K2  | 90.47 | 1000   | 0.7634408 | 0.690476  | 0.90625     |
| Rpl18 | P35980 | 19  | EPK(*)SQDIYLR(*)                   | K3  | 87.43 | 1000   | 0.7849462 | 0.726190  | 0.916666666 |
| Rpl18 | P35980 | 78  | ENK(*)TAVVVGTVTDDVR(*)             | K3  | 72.95 | 1000   | 0.7096774 | 0.6666666 | 0.875       |
| Rpl18 | P35980 | 164 | APGTPHSHTK(*)PYVR(*)               | K10 | 70.12 | 1000   | 0.9677419 | 0.726190  | 0.802083333 |
| Rpl18 | P35980 | 132 | ILTFDQLALESPK(*)GR(*)              | K13 | 47.04 | 1000   | -         | 0.619047  | 0.947916666 |
| Rpl18 | P35980 | 19  | R(*)K(*)EPK(*)SQDIYLR(*)           | K5  | 46.47 | 22.69  | -         | 0.702380  | 0.9375      |
| Rpl18 | P35980 | 164 | GTPHSHTK(*)PYVR(*)                 | K8  | 7.67  | 1000   | -         | -         | 1.5         |
| Ppm1b | P36993 | 314 | DSELDK(*)HLESR(*)                  | K6  | 58.46 | 1000   | 0.6694915 | -         | 0.807228571 |
| Por   | P37040 | 176 | FAVFGLGNK(*)TYEHFNAMGK(*)          | K9  | 61.17 | 25.74  | -         | -         | 0.83908046  |
| Por   | P37040 | 481 | VHPNSVHIC(+57.02)AVAVEYEAK(*)      | K18 | 35.15 | 1000   | 0.4949494 | -         | 1.655172413 |
| TagIn | P37804 | 17  | EVQSK(*)IEK(*)                     | K5  | 87.11 | 47.36  | 0.9807692 | 1.012195  | 1.020618556 |
| TagIn | P37804 | 172 | DFTDSQLQEGK(*)HVIGLQMGSNR(*)       | K11 | 69.84 | 1000   | 1.1923076 | 0.951219  | 0.917525381 |
| TagIn | P37804 | 57  | LK(*)NGVILSK(*)                    | K2  | 29.55 | 118.11 | -         | -         | 1.164948454 |
| TagIn | P37804 | 75  | LVNSLYPEGSK(*)PVK(*)               | K11 | 26.88 | 24.24  | 0.7980769 | 0.731707  | 0.618556111 |
| Fbln2 | P37889 | 976 | C(+57.02)SC(+57.02)AAGFLLAADGI     | K14 | 84.08 | 1000   | 1.0326086 | 0.913043  | 0.968421052 |
| Fbln2 | P37889 | 976 | LLAADGK(*)HC(+57.02)EDVNEC(+57.02) | K7  | 55.71 | 1000   | 0.9456521 | 1.695652  | -           |
| Lig1  | P37913 | 225 | GAK(*)TLSSFFTPR(*)                 | K3  | 77.12 | 1000   | 0.8260869 | 0.5866666 | 0.910112359 |
| Lig1  | P37913 | 280 | NNYHPIEDAC(+57.02)WK(*)HGQK(*)     | K12 | 40.02 | 34.3   | 0.9021739 | -         | 1.235955056 |
| Lig1  | P37913 | 239 | K(*)PAVK(*)TEVK(*)                 | K5  | 18.84 | 67.69  | 0.8369565 | 0.693333  | 0.786516842 |
| Hsf1  | P38532 | 162 | LLAMK(*)HENEALWR(*)                | K5  | 30.55 | 1000   | -         | -         | -           |
| Hspa9 | P38647 | 138 | DTK(*)NVPFK(*)                     | K3  | 89.06 | 95.62  | 0.8842105 | 0.810126  | 0.943820512 |
| Hspa9 | P38647 | 563 | DDIENMVK(*)NAEK(*)                 | K8  | 78.32 | 82.24  | 0.8421052 | 0.936708  | 0.910112359 |
| Hspa9 | P38647 | 175 | MK(*)ETAENYLGHHTAK(*)              | K2  | 76.89 | 255.02 | 0.9473684 | 0.860759  | 1.011235955 |
| Hspa9 | P38647 | 394 | MPK(*)VQQTVDLQDFGR(*)              | K3  | 61.26 | 1000   | 0.9473684 | 0.569620  | 1.258426086 |
| Hspa9 | P38647 | 187 | ETAENYLGHHTAK(*)NAVITVPAYFNDS      | K12 | 60.69 | 1000   | 1.1052631 | -         | 1.056179179 |
| Hspa9 | P38647 | 121 | QAVTNPNNTFYATK(*)R(*)              | K14 | 25.41 | 1000   | -         | -         | 0.651685393 |
| Hspa9 | P38647 | 300 | ETGVDLTK(*)DNMALQR(*)              | K8  | 14.87 | 1000   | -         | -         | 1.719101124 |
| Dnm1  | P39053 | 393 | EISYAIK(*)NIHGIR(*)                | K7  | 66.87 | 1000   | 0.9032258 | 0.96      | 1.149425353 |
| Dnm2  | P39054 | 393 | EISYAIK(*)NIHGVR(*)                | K7  | 80.11 | 1000   | 0.9651162 | 0.922077  | 0.977777777 |

|         |        |     |                                    |     |       |        |           |          |             |             |
|---------|--------|-----|------------------------------------|-----|-------|--------|-----------|----------|-------------|-------------|
| Dnm2    | P39054 | 87  | TEYAEFLHC(+57.02)K(*)SK(*)         | K10 | 55.62 | 33.18  | 0.7906976 | 0.948051 | -           | 0.8693748   |
| Dnm2    | P39054 | 77  | SK(*)TEYAEFLHC(+57.02)K(*)         | K2  | 14.01 | 207.31 | -         | 1.285714 | 1.488888    | 1.3873016   |
| Dnm2    | P39054 | 677 | DLMPK(*)TIMHLMINNTK(*)             | K5  | 8     | 41.33  | -         | -        | 1.277777778 |             |
| Tjp1    | P39447 | 9   | AAAAK(*)STAMEETAWEQHTVTLHR         | K5  | 38.82 | 1000   | 1.2022471 | 1.538461 | 0.901098    | 1.2139359   |
| Tjp1    | P39447 | 702 | QIIDQDK(*)HALLDVTPNAVDR(*)         | K7  | 33.18 | 1000   | 1.4494382 | -        | 0.835164    | 1.1423015   |
| Fen1    | P39749 | 250 | AVDLIQK(*)HK(*)                    | K7  | 90.98 | 30.36  | 0.9354838 | 0.831168 | 0.956043    | 0.9075656   |
| Fen1    | P39749 | 252 | HK(*)SIEEIVR(*)                    | K2  | 59.84 | 1000   | 1.0967741 | 0.740259 | 0.989010    | 0.942015    |
| Fen1    | P39749 | 24  | ENDIK(*)SYFGR(*)                   | K5  | 39.07 | 1000   | 1.1720430 | 1.857142 | 1           | 1.343062    |
| Timp3   | P39876 | 148 | IK(*)SC(+57.02)YYLPC(+57.02)FVTS   | K2  | 77.66 | 223.58 | 1.21      | 1.658227 | 0.980582    | 1.2829368   |
| Timp3   | P39876 | 188 | QK(*)GGYC(+57.02)SWYR(*)           | K2  | 35.5  | 1000   | 1.15      | 1.303797 | 0.883495    | 1.1124309   |
| Cap1    | P40124 | 411 | VPTISINK(*)TDGC(+57.02)HAYLSK(*)   | K8  | 93.95 | 150.82 | 1.0760869 | -        | 0.934065    | 1.0050764   |
| Cap1    | P40124 | 421 | TDGC(+57.02)HAYLSK(*)NSLDC(+57.02) | K10 | 84.61 | 267.5  | 1.0652173 | 0.815789 | 0.967032    | 0.9493466   |
| Cap1    | P40124 | 70  | EIGGDVQK(*)HAEMVHTGLK(*)           | K8  | 82.84 | 92.69  | 1.0543478 | 0.881578 | 0.956043    | 0.9639902   |
| Cap1    | P40124 | 271 | SALFAQINQGESITHALK(*)HVSDDMK       | K18 | 62.21 | 38.97  | 1.1956521 | 1.210526 | 0.978021    | 1.1280668   |
| Cap1    | P40124 | 208 | EFHTTGLAWSK(*)TGPAVK(*)            | K11 | 56.56 | 41.94  | 1.1956521 | 0.802631 | 0.901098    | 0.9664609   |
| Cap1    | P40124 | 197 | IK(*)EFHTTGLAWSK(*)                | K2  | 30.86 | 101.16 | -         | -        | 1.120879    | 1.121       |
| Tkt     | P40142 | 144 | YFDK(*)ASYR(*)                     | K4  | 93.62 | 1000   | 1.0105263 | 1.103896 | 0.923913    | 1.0127785   |
| Tkt     | P40142 | 6   | M(+42.01)EGYHK(*)PDQKQ(*)          | K6  | 92.19 | 95.62  | 0.9894736 | 0.896103 | 0.967391    | 0.9509896   |
| Tkt     | P40142 | 232 | AFGQAK(*)HQPTAIIAK(*)              | K6  | 78.54 | 218.32 | 0.9473684 | 0.870129 | 0.858695    | 0.8920646   |
| Tkt     | P40142 | 241 | HQPTAIIAK(*)TFK(*)                 | K9  | 69.9  | 53.53  | 0.8631578 | 0.844155 | 0.913043    | 0.8734524   |
| Tkt     | P40142 | 465 | AVELAANTK(*)GIC(+57.02)FIR(*)      | K9  | 40.91 | 1000   | 0.8210526 | -        | 0.815217    | 0.818135    |
| Tkt     | P40142 | 260 | EAWHKG(*)PLPK(*)                   | K6  | 34.29 | 31.27  | 0.7263157 | -        | 1.054347    | 0.8903318   |
| Cxcl12  | P40224 | 48  | HLK(*)ILNTPNC(+57.02)ALQIVAR(*)    | K3  | 16.76 | 1000   | -         | -        | 1.240963    | 1.240963855 |
| Vps26a  | P40336 | 288 | YFK(*)QQEIIILWR(*)                 | K3  | 51.25 | 1000   | -         | -        | 1.226190    | 1.226190476 |
| Vps26a  | P40336 | 38  | VEK(*)HYLFYDGESVSGK(*)             | K3  | 48.17 | 187.28 | 1.1978021 | 0.987179 | 1.190476    | 1.1251526   |
| Rpl28   | P41105 | 84  | TTINK(*)NAR(*)                     | K5  | 79.42 | 1000   | -         | 0.888888 | 0.903225    | 0.8960573   |
| Cd63    | P41731 | 138 | TATILDK(*)LQK(*)                   | K7  | 20.32 | 37.54  | 1.2567567 | -        | 1.223529    | 1.2401431   |
| Septin2 | P42208 | 174 | AIHNN(*)VNIVPVIK(*)                | K5  | 83.36 | 161.68 | 0.9673913 | 0.846153 | 0.836956    | 0.8835006   |
| Septin2 | P42208 | 183 | VNIVPVIK(*)ADTLTLK(*)              | K9  | 49.61 | 49.06  | 1.0217391 | -        | 1.108695    | 1.0652174   |
| Stat3   | P42227 | 348 | TGVQFTTK(*)VR(*)                   | K8  | 53.8  | 1000   | 0.9791666 | 0.8      | 0.900990    | 0.8933856   |
| Stat3   | P42227 | 631 | DISGK(*)TQIQSVPEYTK(*)             | K5  | 51.82 | 203.1  | -         | -        | 0.841584    | 0.841584158 |
| Pura    | P42669 | 272 | FGHTFC(+57.02)K(*)YSEEMK(*)        | K7  | 61.26 | 133.21 | 0.5625    | 0.743902 | 0.833333    | 0.7132453   |
| Pura    | P42669 | 143 | ALK(*)SEFLVR(*)                    | K3  | 46.55 | 1000   | 1.0833333 | 0.792682 | 1.154761    | 1.0102594   |
| Cct8    | P42932 | 466 | ANEVISK(*)LYSVHQEGNK(*)            | K7  | 89.38 | 89.7   | 0.8979591 | 0.875    | 0.893617    | 0.8888587   |

|        |        |     |                                 |     |       |        |           |          |          |           |
|--------|--------|-----|---------------------------------|-----|-------|--------|-----------|----------|----------|-----------|
| Cct8   | P42932 | 152 | AHEILPELVC(+57.02)C(+57.02)SAK( | K14 | 86.35 | 1000   | 0.7857142 | 0.7      | 0.968085 | 0.8179331 |
| Cct8   | P42932 | 318 | LNSK(*)WDLR(*)                  | K4  | 76.23 | 1000   | 0.8469387 | 0.825    | 0.946808 | 0.8729158 |
| Cct8   | P42932 | 20  | DGAK(*)HFSGLEEAVYR(*)           | K4  | 73.42 | 1000   | 1.0918367 | 0.9875   | 0.978723 | 1.0193534 |
| Cct8   | P42932 | 260 | GTVLIK(*)TAEELMNFSK(*)          | K6  | 68.31 | 228.69 | -         | -        | 0.765957 | 0.7447    |
| Cct8   | P42932 | 459 | ALAENSGVK(*)ANEVSK(*)           | K9  | 63.51 | 142.27 | 0.8775510 | 0.8875   | 0.904255 | 0.8897688 |
| Cct8   | P42932 | 171 | TSIMSK(*)QYGSETFLAK(*)          | K6  | 61.34 | 203.9  | 1.0204081 | 0.8625   | 0.946808 | 0.9432389 |
| Cct8   | P42932 | 326 | LC(+57.02)K(*)TVGATALPK(*)      | K3  | 35.16 | 161.52 | -         | 1.1875   | 0.808510 | 0.9980053 |
| Nr2f2  | P43135 | 89  | SSGK(*)HYGQFTC(+57.02)EGC(+57.  | K4  | 38.23 | 112.13 | 1.3291139 | 0.259259 | 0.833333 | 0.8072355 |
| Nr2f2  | P43135 | 100 | HYGQFTC(+57.02)EGC(+57.02)K(*)  | K11 | 33.84 | 42.89  | -         | -        | 0.427083 | 0.3333    |
| Msh2   | P43247 | 59  | EVFK(*)TQGVIK(*)                | K4  | 52.03 | 92.15  | 0.9550561 | 0.686746 | 0.829545 | 0.8237829 |
| Msh2   | P43247 | 918 | AEVVAK(*)NNSFVNEIISR(*)         | K6  | 50.75 | 1000   | 1.6067415 | 1.289156 | 2.068181 | 1.6546933 |
| Msh2   | P43247 | 73  | YMGPAGSK(*)TLQSVVLSK(*)         | K8  | 25.93 | 140.79 | 3.7640449 | 2.277108 | 2.204545 | 2.7485663 |
| Msh2   | P43247 | 104 | VEVYK(*)NK(*)                   | K5  | 11.32 | 30.83  | -         | -        | 0.931818 | 0.182     |
| H1-4   | P43274 | 97  | GTLVQTK(*)GTGASGSFK(*)          | K7  | 71    | 184.08 | -         | 2.043478 | 1.259259 | 1.6513688 |
| H1-4   | P43274 | 46  | TSGPPVSELITK(*)AVAASK(*)        | K12 | 56.11 | 95.51  | -         | -        | 0.950617 | 0.284     |
| H1-4   | P43274 | 192 | AK(*)TVK(*)PK(*)                | K2  | 15.66 | 77.24  | 1.1363636 | -        | -        | -         |
| H1-1   | P43275 | 121 | AITTK(*)VSVK(*)                 | K5  | 98.67 | 82.24  | 1.1208791 | 1.073529 | 1.0875   | 1.0939695 |
| H1-1   | P43275 | 87  | LGLK(*)SLVNK(*)                 | K4  | 86.45 | 96.85  | 1.1098901 | 1.029411 | 1.0625   | 1.0672673 |
| H1-1   | P43275 | 77  | SLAAAGYDVEK(*)NNSR(*)           | K11 | 78.84 | 1000   | 1.0659340 | 1.117647 | 1.05     | 1.0778604 |
| H1-1   | P43275 | 99  | GTLVQTK(*)GTGAAGSFK(*)          | K7  | 57.49 | 120.76 | 0.7142857 | -        | 0.95     | 0.8321429 |
| H1-1   | P43275 | 92  | SLVNK(*)GTLVQTK(*)              | K5  | 25.69 | 110.43 | 0.8791208 | 1.235294 | 1.2      | 1.104805  |
| H1-5   | P43276 | 46  | ATGPPVSELITK(*)AVSASK(*)        | K12 | 76.67 | 33.66  | 0.9444444 | 0.855072 | 0.928571 | 0.9093628 |
| H1-5   | P43276 | 75  | ALAAGGYDVEK(*)NNSR(*)           | K11 | 55.25 | 1000   | 1.1888888 | 1.028985 | 1.142857 | 1.1202438 |
| H1-5   | P43276 | 46  | K(*)ATGPPVSELITK(*)AVSASK(*)    | K13 | 32.13 | 51.99  | 2.0777777 | -        | 0.928571 | 1.5031746 |
| Dck    | P43346 | 211 | LHYK(*)HESWLLHR(*)              | K4  | 72.39 | 1000   | 0.9775280 | -        | 0.891304 | 0.9344162 |
| Itgav  | P43406 | 553 | SPVHSK(*)TMTVFR(*)              | K6  | 54.76 | 1000   | 0.6862745 | 0.746835 | 0.525252 | 0.6527875 |
| Sdc2   | P43407 | 135 | STDVYTEK(*)HSDNLFK(*)           | K8  | 24.92 | 85.08  | -         | -        | -        | -         |
| Akr1b1 | P45376 | 243 | YNK(*)TTAQVLIR(*)               | K3  | 96.18 | 1000   | 0.8823529 | 0.780487 | 0.928571 | 0.8638041 |
| Akr1b1 | P45376 | 86  | LWC(+57.02)TFHDK(*)SMVK(*)      | K8  | 88.29 | 97.69  | 1.1078431 | 0.878048 | 1.030612 | 1.0055014 |
| Akr1b1 | P45376 | 263 | NLVVIPK(*)SVTPVR(*)             | K7  | 82.62 | 1000   | 0.6960784 | 0.634146 | 0.816326 | 0.7155171 |
| Akr1b1 | P45376 | 179 | YK(*)PAVNQIEC(+57.02)HPYLTQEK(  | K2  | 79.81 | 129.22 | 1.2549019 | 1.146341 | 1.010204 | 1.1371492 |
| Akr1b1 | P45376 | 78  | IVSK(*)LWC(+57.02)TFHDK(*)      | K4  | 78.62 | 192.66 | 0.8725490 | 0.719512 | 0.938775 | 0.8436122 |
| Akr1b1 | P45376 | 306 | VC(+57.02)ALMSC(+57.02)AK(*)HK  | K9  | 72.94 | 26.31  | 1.6568627 | 1.451219 | 1.581632 | 1.5632383 |
| Akr1b8 | P45377 | 263 | NVVVIPK(*)SVTPSR(*)             | K7  | 68.02 | 1000   | 0.7777777 | 0.903614 | 0.785714 | 0.8223688 |

|         |        |      |                                          |     |       |        |           |          |          |           |
|---------|--------|------|------------------------------------------|-----|-------|--------|-----------|----------|----------|-----------|
| Akr1b8  | P45377 | 22   | MPIVGLGTWK(*)SPPNQVK(*)                  | K10 | 39.23 | 50.34  | -         | 0.722891 | 0.806122 | 0.764507  |
| Crebbp  | P45481 | 1598 | TNK(*)NK(*)SSISR(*)                      | K5  | 92.56 | 1000   | 0.6222222 | 0.554687 | -        | 0.5884549 |
| Crebbp  | P45481 | 1596 | TNK(*)NK(*)SSISR(*)                      | K3  | 92.56 | 1000   | 0.6222222 | 0.554687 | -        | 0.5884549 |
| Crebbp  | P45481 | 1217 | TLC(+57.02)C(+57.02)YGK(*)QLC(+57.02)YK7 | K7  | 86.47 | 1000   | 0.6518518 | 0.507812 | -        | 0.5798322 |
| Crebbp  | P45481 | 1712 | FVYTC(+57.02)NEC(+57.02)K(*)HHV\ K9      | K9  | 72.13 | 1000   | 0.6888888 | 0.601562 | -        | 0.6452257 |
| Crebbp  | P45481 | 1712 | YTC(+57.02)NEC(+57.02)K(*)HHVET K7       | K7  | 68.83 | 1000   | 0.6296296 | 0.515625 | -        | 0.5726273 |
| Crebbp  | P45481 | 1217 | K(*)YEFSPQTLC(+57.02)C(+57.02)YK14       | K14 | 63.25 | 163.91 | 0.3185185 | 0.640625 | -        | 0.4795718 |
| Crebbp  | P45481 | 67   | HK(*)QLSELLR(*)                          | K2  | 55.38 | 1000   | 0.5851851 | 0.53125  | -        | 0.5582176 |
| Crebbp  | P45481 | 1628 | LYATM(+15.99)EK(*)HK(*)                  | K7  | 49.72 | 27.16  | 0.8592592 | 0.671875 | -        | 0.7655671 |
| Crebbp  | P45481 | 1763 | MVK(*)WGLGLDDEGSSQGEPQSK(*) K21          | K21 | 29.19 | 1000   | 0.7925925 | -        | -        |           |
| Crebbp  | P45481 | 1745 | MVK(*)WGLGLDDEGSSQGEPQSK(*) K3           | K3  | 29.19 | 1000   | 0.7925925 | -        | -        |           |
| Crebbp  | P45481 | 119  | GK(*)SPLNQGDSSTPNLPK(*)                  | K2  | 25.59 | 170.25 | 0.5259259 | 1.101562 | -        | 0.8137442 |
| Crebbp  | P45481 | 1217 | GK(*)QLC(+57.02)TIPR(*)                  | K2  | 24.08 | 1000   | 1.0074074 | 1.21875  | -        | 1.1130787 |
| Crebbp  | P45481 | 1587 | GDSK(*)NAK(*)K(*)K(*)                    | K7  | 22.25 | 39.76  | 0.4074074 | 0.367187 | -        | 0.3872975 |
| Crebbp  | P45481 | 1584 | GDSK(*)NAK(*)K(*)K(*)                    | K4  | 22.25 | 127.18 | 0.4074074 | 0.367187 | -        | 0.3872975 |
| Crebbp  | P45481 | 419  | QIISHWK(*)NC(+57.02)TR(*)                | K7  | 17.24 | 1000   | -         | 0.6875   | -        |           |
| Crebbp  | P45481 | 1598 | NK(*)SSISR(*)                            | K2  | 13.13 | 1000   | -         | -        | -        |           |
| Crebbp  | P45481 | 388  | TMK(*)NVLNHMTHC(+57.02)QAGK K3           | K3  | 12.1  | 39.02  | 0.8518518 | -        | -        |           |
| Crebbp  | P45481 | 1745 | SHTHK(*)MVK(*)WGLGLDDEGSSQG K8           | K8  | 8.07  | 40.42  | -         | 0.90625  | -        |           |
| Crebbp  | P45481 | 1742 | SHTHK(*)MVK(*)WGLGLDDEGSSQG K5           | K5  | 8.07  | 34.05  | -         | 0.90625  | -        |           |
| Crebbp  | P45481 | 1712 | TC(+57.02)NEC(+57.02)K(*)HHVET K6        | K6  | 6.12  | 1000   | -         | -        | -        |           |
| Cfl2    | P45591 | 132  | FTGIK(*)HEWQVNLDDIK(*)                   | K5  | 19.09 | 85.14  | -         | -        | 1.542553 | 1.91      |
| Rangap1 | P46061 | 526  | LLIHMGLLK(*)SEDK(*)                      | K9  | 91.45 | 97.69  | 0.8181818 | 0.911392 | 0.840425 | 0.8566666 |
| Rangap1 | P46061 | 477  | LK(*)VASVFR(*)                           | K2  | 36.36 | 1000   | -         | 1.063291 | 1.085106 | 1.0741988 |
| Vps4b   | P46467 | 217  | LVK(*)NLFQLAR(*)                         | K3  | 57.94 | 1000   | 0.8333333 | 0.805194 | 1.118279 | 0.9189359 |
| Vps4b   | P46467 | 180  | GILLFGPPGTGK(*)SYLAK(*)                  | K12 | 42.28 | 51     | 1.1888888 | 0.844155 | 0.935483 | 0.9895095 |
| Psmc2   | P46471 | 222  | GVLLFGPPGTGK(*)TLC(+57.02)AR(*) K12      | K12 | 71.2  | 1000   | -         | 0.777777 | 0.576086 | 0.6769324 |
| Psmc2   | P46471 | 356  | THIFK(*)IHAR(*)                          | K5  | 47.85 | 1000   | 1         | 0.814814 | 0.891304 | 0.9020397 |
| Rab11b  | P46638 | 24   | VVLIGDSGVGK(*)SNLLSR(*)                  | K11 | 93.51 | 1000   | 0.90625   | 0.839080 | 1        | 0.9151102 |
| Rab11b  | P46638 | 125  | DHADSNIVIMLVGNK(*)SDLR(*)                | K15 | 42.83 | 1000   | 0.8854166 | -        | 0.965909 | 0.9256629 |
| Rab11b  | P46638 | 125  | LVGNK(*)SDLR(*)                          | K5  | 6.17  | 1000   | -         | -        | 1.647727 | 2.73      |
| Adss2   | P46664 | 447  | WIGVGK(*)SR(*)                           | K6  | 85.61 | 1000   | 0.8229166 | 0.841463 | 0.913978 | 0.8594529 |
| Adss2   | P46664 | 397  | LDGETIPHFPANQEVLNK(*)VEVQYK( K18         | K18 | 18.65 | 53.33  | -         | -        | 0.806451 | 1.613     |
| Nedd4   | P46935 | 453  | GK(*)TDSNDLGPLPPGWEER(*)                 | K2  | 37.54 | 1000   | 0.9148936 | 3.026666 | 0.561797 | 1.5011193 |

|        |        |     |                                |     |       |        |           |          |             |           |
|--------|--------|-----|--------------------------------|-----|-------|--------|-----------|----------|-------------|-----------|
| Nedd4  | P46935 | 429 | SYVVDHNSK(*)TTTWSK(*)          | K9  | 27.25 | 55.13  | 1.0319148 | 1.226666 | 0.797752    | 1.0187781 |
| Nedd4  | P46935 | 445 | SK(*)IPAHLR(*)                 | K2  | 9.73  | 1000   | 1.1276595 | -        | 0.842696    | 0.9851781 |
| Yap1   | P46938 | 306 | LK(*)QQELFR(*)                 | K2  | 30.22 | 1000   | -         | -        | 0.466666667 |           |
| Yap1   | P46938 | 239 | NK(*)TTSWLDPR(*)               | K2  | 8.54  | 1000   | -         | 1.815384 | -           |           |
| Stt3a  | P46978 | 188 | AVK(*)TGSIWAAK(*)              | K3  | 30.14 | 101.1  | -         | -        | 0.727272727 |           |
| Tes    | P47226 | 188 | YK(*)SEALGVGDVK(*)             | K2  | 71.17 | 177.91 | 0.7126436 | -        | 0.894117    | 0.8033807 |
| Tes    | P47226 | 85  | LK(*)SDGIPMYK(*)               | K2  | 53.7  | 150.89 | 1.6436781 | -        | 1.435294    | 1.5394861 |
| Aldh2  | P47738 | 430 | FK(*)TIEEVVGR(*)               | K2  | 80.93 | 1000   | 0.9494949 | 0.759493 | 0.977528    | 0.8955056 |
| Aldh2  | P47738 | 377 | ILGYIK(*)SGQQEGAK(*)           | K6  | 79.83 | 105.52 | 0.7979797 | 0.759493 | 0.910112    | 0.8225286 |
| Aldh2  | P47738 | 157 | YYAGWADK(*)YHGK(*)             | K8  | 72.65 | 48.12  | 0.8484848 | 0.708860 | 1.011235    | 0.8561939 |
| Aldh2  | P47738 | 513 | TVTVK(*)VPQK(*)                | K5  | 64.42 | 42.89  | 0.6868686 | 0.620253 | 0.786516    | 0.6978796 |
| Aldh2  | P47738 | 161 | YHGK(*)TIPIDGDFFSYTR(*)        | K4  | 58.64 | 1000   | -         | -        | 0.528089    | 0.888     |
| Capza2 | P47754 | 268 | TK(*)IDWNK(*)                  | K2  | 62.6  | 105.53 | 0.90625   | 0.779069 | 0.93        | 0.8717733 |
| Capza2 | P47754 | 273 | IDWNK(*)ILSYK(*)               | K5  | 44.19 | 98.37  | 0.9791666 | 1.069767 | 0.89        | 0.9796447 |
| Capza2 | P47754 | 278 | ILSYK(*)IGK(*)                 | K5  | 7.56  | 34.94  | -         | 1.383720 | 1.01        | 1.1968605 |
| Capzb  | P47757 | 145 | IK(*)GC(+57.02)WDSIHVVEVQEK(*) | K2  | 84    | 113.99 | 0.8080808 | -        | 1.022471    | 0.9152764 |
| Capzb  | P47757 | 159 | GC(+57.02)WDSIHVVEVQEK(*)SSGF  | K14 | 58.67 | 1000   | 1.1414141 | 0.913043 | 1.146067    | 1.0668417 |
| Capzb  | P47757 | 57  | VVGK(*)DYLLC(+57.02)DYNR(*)    | K4  | 57.41 | 1000   | 1.5252525 | 1.086956 | -           | 1.3061045 |
| Gsr    | P47791 | 324 | GLNLNK(*)VGIQTDEK(*)           | K6  | 45.15 | 171.49 | 1.0425531 | 0.730337 | 0.632653    | 0.8018478 |
| Gsr    | P47791 | 479 | MGATK(*)ADFDNTVAIHPTSSEELVTL   | K5  | 10.92 | 1000   | -         | -        | 1.244897    | 0.959     |
| Gsr    | P47791 | 415 | YGK(*)DNVK(*)                  | K3  | 5.55  | 67.69  | -         | -        | 1.153061    | 0.1224    |
| Map2k4 | P47809 | 52  | LNANPPVK(*)STAR(*)             | K9  | 8.18  | 1000   | -         | 0.647887 | -           |           |
| Mapk14 | P47811 | 79  | HMK(*)HENVIGLLDVFTPAR(*)       | K3  | 19.07 | 1000   | 1.3541666 | -        | -           |           |
| Gfpt1  | P47856 | 554 | LATELYHQK(*)SVLIMGR(*)         | K9  | 45.18 | 1000   | 0.5567010 | -        | 0.967741    | 0.7622215 |
| Gfpt1  | P47856 | 190 | ALVFK(*)SVHFPGQAVGTR(*)        | K5  | 40.81 | 1000   | 0.7938144 | 0.7875   | 1.010752    | 0.8640224 |
| Rpl6   | P47911 | 102 | VLATVTK(*)TVGGDK(*)            | K7  | 89.37 | 57.71  | 1.125     | 0.666666 | 0.822222    | 0.8712963 |
| Rpl6   | P47911 | 218 | IPK(*)HLTDAYFK(*)              | K3  | 86.15 | 171.6  | 0.8461538 | 0.756410 | 0.888888    | 0.8304843 |
| Rpl6   | P47911 | 208 | FVIATSTK(*)VDISDVK(*)          | K8  | 48.04 | 128.65 | 1.6346153 | -        | 1.4         | 1.5173077 |
| Rpl29  | P47915 | 101 | LAFIAHPK(*)LGK(*)              | K8  | 50.95 | 49.37  | 0.9259259 | 0.92     | 1.047619    | 0.964515  |
| Fosl2  | P47930 | 104 | PGVIK(*)TIGTTVGR(*)            | K5  | 56.16 | 1000   | 0.6571428 | 0.343065 | 0.524193    | 0.508134  |
| Rpl5   | P47962 | 158 | TTTGNK(*)VFGALK(*)             | K6  | 96.66 | 121.92 | 0.8446601 | 0.747126 | 0.917525    | 0.8364375 |
| Rpl5   | P47962 | 27  | EGK(*)TDYYAR(*)                | K3  | 85.57 | 1000   | 0.8640776 | 0.816091 | 0.876288    | 0.8521528 |
| Rpl5   | P47962 | 228 | IK(*)NNVTPDMMMEEMYK(*)         | K2  | 83.97 | 226.1  | 0.8737864 | 0.827586 | 0.969072    | 0.8901483 |
| Rpl13  | P47963 | 123 | SK(*)LILFPR(*)                 | K2  | 92.5  | 1000   | 0.8854166 | 0.92     | 0.879120    | 0.8948458 |

|         |        |      |                                 |     |       |        |           |          |          |           |
|---------|--------|------|---------------------------------|-----|-------|--------|-----------|----------|----------|-----------|
| Rpl13   | P47963 | 11   | NGMILK(*)PHFHK(*)               | K6  | 47.87 | 52.68  | 1.125     | 0.786666 | 0.989010 | 0.9668926 |
| Rpl36   | P47964 | 13   | YPMVGLNK(*)GHK(*)               | K9  | 58.93 | 62.26  | 0.9387755 | 0.883720 | 0.903225 | 0.9085741 |
| Rpl36   | P47964 | 19   | VTK(*)NVSK(*)PR(*)              | K3  | 32.32 | 104.08 | 0.9693877 | 0.825581 | 0.666666 | 0.8205453 |
| Anxa5   | P48036 | 95   | LYDAYELK(*)HALK(*)              | K8  | 87.85 | 88.98  | 0.9263157 | 0.961538 | 1.011363 | 0.966406  |
| Anxa5   | P48036 | 56   | QEIAQEFK(*)TLFGR(*)             | K8  | 48.11 | 1000   | 0.9578947 | 1.115384 | 0.772727 | 0.9486689 |
| Anxa5   | P48036 | 74   | SELTGK(*)FEK(*)                 | K6  | 40.63 | 37.54  | 1.2842105 | -        | 0.954545 | 1.119378  |
| Anxa5   | P48036 | 68   | DLVDDLK(*)SELTGK(*)             | K7  | 36.14 | 113.99 | -         | -        | 0.863636 | 0.8636364 |
| Tbca    | P48428 | 41   | MK(*)AEDGENYAIK(*)              | K2  | 40.04 | 184.95 | 1.0679611 | 0.682352 | 0.944444 | 0.8982529 |
| Ppp3cb  | P48453 | 56   | VDVLK(*)NHLVK(*)                | K5  | 27.81 | 52.68  | -         | 1.158730 | 0.757763 | 0.9582471 |
| Lmna    | P48678 | 457  | NK(*)SNEDQSMGNWQIR(*)           | K2  | 74.04 | 1000   | 0.8453608 | 0.858974 | 1.022727 | 0.9090208 |
| Lmna    | P48678 | 108  | LQLELSK(*)VR(*)                 | K7  | 51.42 | 1000   | 1.0206185 | 1.448717 | -        | 1.2346683 |
| Lmna    | P48678 | 208  | EELDFQK(*)NIYSEELR(*)           | K7  | 47.28 | 1000   | 0.7319587 | 2.089743 | 0.943181 | 1.2549614 |
| Hspa4l  | P48722 | 53   | AIGNAAK(*)SQIVTNVR(*)           | K7  | 49.67 | 1000   | 1.0449438 | 0.779069 | 0.902173 | 0.9087292 |
| Hspa4l  | P48722 | 430  | SK(*)VITFHK(*)                  | K2  | 26.56 | 98.75  | 1.0561797 | -        | -        | -         |
| Hspa4l  | P48722 | 578  | IK(*)SIDLPIQSSLYR(*)            | K2  | 12.43 | 1000   | -         | -        | 1.130434 | 0.783     |
| Pcnt    | P48725 | 1931 | SASGQAPLWAVAPSAGK(*)HHAER(*)    | K17 | 73.01 | 1000   | 1.0666666 | 0.662650 | 0.5125   | 0.7472724 |
| Pcnt    | P48725 | 271  | IFQAK(*)HEAEVSLK(*)             | K5  | 41.8  | 159.99 | -         | -        | 0.475    | -         |
| Pcnt    | P48725 | 2350 | QLAQNNQLC(+57.02)VALK(*)HER(*)  | K13 | 41.55 | 1000   | 1.1066666 | -        | 0.35     | 0.7283333 |
| Pcnt    | P48725 | 1249 | QQLAALDK(*)HLR(*)               | K8  | 23.37 | 1000   | 1.2533333 | 0.759036 | 0.74375  | 0.9187065 |
| Cox7a2  | P48771 | 46   | LFQEDNGMPVHLK(*)GGASDALLYR(*)   | K13 | 27.9  | 1000   | -         | -        | 0.46     | -         |
| Slc25a4 | P48962 | 166  | IFK(*)SDGLK(*)                  | K3  | 95.2  | 55.6   | 0.6868686 | 0.7      | 0.84375  | 0.7435396 |
| Slc25a4 | P48962 | 96   | YK(*)QIFLGGVDR(*)               | K2  | 93.27 | 1000   | 1.3434343 | 0.875    | 0.802083 | 1.0068392 |
| Slc25a4 | P48962 | 147  | LAADV GK(*)GSSQR(*)             | K7  | 82.5  | 1000   | 0.8888888 | 0.7875   | 0.927083 | 0.8678241 |
| Slc25a4 | P48962 | 23   | DFLAGGIAAAVSK(*)TAVAPIER(*)     | K13 | 61.06 | 1000   | 0.8888888 | -        | 0.791666 | 0.8402778 |
| Slc25a4 | P48962 | 163  | EFNGLGDC(+57.02)LTK(*)IFK(*)    | K11 | 49.93 | 55.63  | 0.9494949 | -        | 1        | 0.9747475 |
| Slc25a4 | P48962 | 199  | AAYFGVYDTAK(*)GMLPDPK(*)        | K11 | 48.7  | 78.16  | 0.5151515 | 0.95     | 0.6875   | 0.7175505 |
| Slc25a4 | P48962 | 272  | DEGANAFFK(*)GAWSNVLR(*)         | K9  | 45.87 | 1000   | 1.1616161 | -        | 0.802083 | 0.9818497 |
| Slc25a4 | P48962 | 23   | VSK(*)TAVAPIER(*)               | K3  | 11.94 | 1000   | -         | 0.825    | -        | -         |
| Slc25a4 | P48962 | 23   | AVSK(*)TAVAPIER(*)              | K4  | 9.67  | 1000   | -         | 0.95     | 1.166666 | 1.0583333 |
| Hnrnpa1 | P49312 | 78   | PHK(*)VDGR(*)                   | K3  | 93.34 | 1000   | 0.9157894 | 0.949367 | 1.033707 | 0.9662881 |
| Hnrnpa1 | P49312 | 3    | S(+42.01)K(*)SESPK(*)EPEQLR(*)  | K2  | 76.18 | 127.18 | 0.8947368 | 0.721518 | 0.876404 | 0.8308868 |
| Hnrnpa1 | P49312 | 183  | ALSK(*)QEMASASSQR(*)            | K4  | 17.33 | 1000   | -         | -        | 1.539325 | 0.843     |
| Hnrnpa1 | P49312 | 166  | IVIQK(*)YHTVNGHNC(+57.02)EVR(*) | K5  | 8.71  | 1000   | -         | -        | 1.258426 | 0.966     |
| Pcyt1a  | P49586 | 341  | WPFSGK(*)TSPSSPASLSR(*)         | K6  | 55.06 | 1000   | -         | 0.567901 | -        | -         |



|          |        |     |                                           |     |       |        |           |          |          |           |
|----------|--------|-----|-------------------------------------------|-----|-------|--------|-----------|----------|----------|-----------|
| Mcm4     | P49717 | 219 | SFSK(*)NLYR(*)                            | K4  | 83.81 | 1000   | 0.8947368 | 0.777777 | 0.824742 | 0.832419  |
| Mcm4     | P49717 | 412 | SVYK(*)THIDVIHYR(*)                       | K4  | 77.21 | 1000   | 0.9368421 | 0.839506 | 0.917525 | 0.897958  |
| Mcm4     | P49717 | 857 | ALADDDFLTGTGK(*)TVR(*)                    | K13 | 70.91 | 1000   | -         | 0.901234 | -        | -         |
| Mcm4     | P49717 | 751 | FSNK(*)VEAIDVEEAK(*)                      | K4  | 65.61 | 176.42 | 0.8736842 | 1.395061 | 1.020618 | 1.0964548 |
| Mcm4     | P49717 | 751 | FSNK(*)VEAIDVEEAK(*)R(*)                  | K4  | 37.54 | 143.6  | -         | -        | 1.020618 | 1.0964548 |
| Mcm5     | P49718 | 141 | ILK(*)SDMMSHLVK(*)                        | K3  | 78.21 | 181.94 | 0.8817204 | 0.725    | 0.923913 | 0.8435445 |
| Psma2    | P49722 | 171 | NYVNGK(*)TFLEK(*)                         | K6  | 69.51 | 77.53  | 1.2247191 | 1.173333 | 1        | 1.1326841 |
| Psma2    | P49722 | 70  | VEPITK(*)HIGLVYSGMGPDYR(*)                | K6  | 66.57 | 1000   | -         | 0.36     | 0.860465 | 0.6102326 |
| Cav1     | P49817 | 57  | DPK(*)HLNDDVVK(*)                         | K3  | 77.62 | 188.52 | 0.4301075 | 0.626666 | 0.772727 | 0.6098338 |
| Cav1     | P49817 | 57  | EIDLVRN(*)DPK(*)HLNDDVVK(*)               | K10 | 60.52 | 118.18 | 0.7956989 | 1.453333 | 0.897727 | 1.0489198 |
| Cav1     | P49817 | 47  | QVYDAHTK(*)EIDLVRN(*)                     | K8  | 5.36  | 1000   | -         | -        | 2.318181 | 1.0489198 |
| Impdh1   | P50096 | 349 | PQGTAVYK(*)VAEYAR(*)                      | K8  | 52.13 | 1000   | -         | -        | 0.801980 | 1.0489198 |
| Ahcy     | P50247 | 186 | VPAINVNDSTVK(*)SK(*)                      | K12 | 81.27 | 20.41  | 0.7473684 | 0.636363 | 0.890109 | 0.7579473 |
| Ahcy     | P50247 | 188 | SK(*)FDNLYGC(+57.02)R(*)                  | K2  | 57.12 | 1000   | -         | 0.688311 | -        | -         |
| Ahcy     | P50247 | 426 | QAQYLGMPINGPFK(*)PDHYR(*)                 | K14 | 52.42 | 1000   | 0.6105263 | -        | 1.120879 | 0.8657027 |
| Ahcy     | P50247 | 331 | YWLK(*)NGR(*)                             | K4  | 27.94 | 1000   | 0.8736842 | 1.155844 | 0.835164 | 0.9548977 |
| Gdi1     | P50396 | 269 | VVGVK(*)SEGEVAR(*)                        | K5  | 65.51 | 1000   | 0.7865168 | 0.948051 | 0.768292 | 0.8342872 |
| Gdi1     | P50396 | 309 | IIC(+57.02)ILSHPIK(*)NTNDANSC(+57.02)R(*) | K10 | 10.76 | 1000   | -         | -        | 0.987804 | 0.8342872 |
| Arsb     | P50429 | 262 | QSVHDPLQVPEEYMEPYGFIQDK(*)H               | K23 | 11.94 | 1000   | -         | -        | 0.904761 | 0.8342872 |
| Shmt1    | P50431 | 380 | VLEAC(+57.02)SIAC(+57.02)NK(*)N           | K11 | 32.93 | 56.15  | 1.3764705 | 1.354430 | -        | 1.3654505 |
| Atp6v1a  | P50516 | 139 | WEFIPSK(*)NLR(*)                          | K7  | 62    | 1000   | -         | 0.630952 | 0.84375  | 0.7373512 |
| Atp6v1e1 | P50518 | 52  | LK(*)IMEYYEK(*)                           | K2  | 52.85 | 142.27 | -         | -        | 1.961538 | 0.7373512 |
| Atp6v1e1 | P50518 | 42  | AEEEFNIEK(*)GR(*)                         | K9  | 18.43 | 1000   | -         | 1.202531 | -        | -         |
| S100a11  | P50543 | 47  | MNTELAFTK(*)NQK(*)                        | K10 | 65.82 | 24.24  | 0.8383838 | 0.7375   | 0.945652 | 0.840512  |
| Acadv1   | P50544 | 196 | GILLYGK(*)AQR(*)                          | K8  | 42.89 | 1000   | 0.6063829 | -        | 0.842696 | 0.7245398 |
| Pa2g4    | P50580 | 93  | NC(+57.02)VC(+57.02)HFSPLK(*)SC           | K10 | 60.75 | 113.97 | -         | -        | 0.892473 | 0.7245398 |
| Pa2g4    | P50580 | 22  | YK(*)MGGDIANR(*)                          | K2  | 10.36 | 1000   | -         | -        | 2        | -         |
| Tspo     | P50637 | 39  | WYASLQK(*)PSWHPPR(*)                      | K7  | 60.57 | 1000   | -         | 1.487179 | 0.855263 | 1.1712213 |
| Cast     | P51125 | 70  | AASLGSSQPSR(*)PHVGEAATATK(*)V             | K22 | 30.87 | 141.74 | 1.5681818 | 1.424657 | 0.701149 | 1.2313296 |
| Rab7a    | P51150 | 146 | SK(*)NNIPYFETSAK(*)                       | K2  | 65.6  | 234.24 | 0.8247422 | 0.719512 | 0.884210 | 0.8094883 |
| Rab7a    | P51150 | 48  | ATIGADFLTK(*)EVMVDDR(*)                   | K10 | 31    | 1000   | 0.7010309 | -        | 2.263157 | 1.4820944 |
| Acadl    | P51174 | 322 | AFGK(*)TVAHIQTVQHK(*)                     | K4  | 82.34 | 70.27  | 0.7676767 | 0.8      | 0.866666 | 0.8114478 |
| Acadl    | P51174 | 338 | LAELK(*)THIC(+57.02)VTR(*)                | K5  | 62.98 | 1000   | 0.8787878 | 0.626666 | 0.9      | 0.8018182 |
| Rpl9     | P51410 | 59  | VDK(*)WWGNR(*)                            | K3  | 93.82 | 1000   | 0.8842105 | 0.775    | 1.011494 | 0.8902349 |

|         |        |     |                                  |     |       |        |           |          |          |           |
|---------|--------|-----|----------------------------------|-----|-------|--------|-----------|----------|----------|-----------|
| Plcb3   | P51432 | 173 | IPVK(*)NILK(*)                   | K4  | 24.25 | 52.86  | 0.8260869 | -        | 1.328947 | 1.0775172 |
| Plcb3   | P51432 | 219 | FLNK(*)LC(+57.02)LR(*)PDIDK(*)   | K4  | 8.53  | 50.04  | 0.8478260 | -        | -        | -         |
| Hsd17b4 | P51660 | 84  | LVK(*)TALDTFGR(*)                | K3  | 89.64 | 1000   | 1.1976744 | 0.939024 | 1.010638 | 1.0491124 |
| Hsd17b4 | P51660 | 50  | GIGK(*)GSSAADK(*)                | K4  | 37.15 | 76.93  | 1.5116279 | -        | 1.106382 | 1.3090054 |
| Gss     | P51855 | 443 | QGTTLVMNK(*)HVGHLR(*)            | K9  | 33.8  | 1000   | -         | 0.89     | 1.024096 | 0.9570482 |
| Hdgf    | P51859 | 39  | IDEMPEAAVK(*)STANK(*)            | K10 | 72.6  | 55.6   | -         | 0.864864 | 0.963414 | 0.9141397 |
| Slc25a5 | P51881 | 96  | YK(*)QIFLGGVDK(*)                | K2  | 97.85 | 208.83 | 0.8369565 | 0.942857 | 0.9      | 0.8932712 |
| Slc25a5 | P51881 | 268 | DEGSK(*)AFFK(*)                  | K5  | 85.61 | 82.24  | 0.6086956 | 0.642857 | 0.666666 | 0.6394065 |
| Slc25a5 | P51881 | 10  | AK(*)DFLAGGVAAAISK(*)            | K2  | 83.36 | 340.63 | 0.8695652 | 0.871428 | 0.944444 | 0.8951461 |
| Slc25a5 | P51881 | 272 | AFFK(*)GAWSNVLR(*)               | K4  | 76.74 | 1000   | 0.7173913 | 0.771428 | 0.866666 | 0.7851622 |
| Slc25a5 | P51881 | 272 | FK(*)GAWSNVLR(*)                 | K2  | 73.63 | 1000   | 0.5978260 | 0.985714 | 0.911111 | 0.8315505 |
| Slc25a5 | P51881 | 96  | YK(*)QIFLGGVDK(*)R(*)            | K2  | 70.77 | 178.84 | 0.8804347 | 1        | 1        | 0.9601449 |
| Slc25a5 | P51881 | 147 | LAADV GK(*)AGAER(*)              | K7  | 61.94 | 1000   | 0.9347826 | 0.957142 | 1.288888 | 1.0602715 |
| Slc25a5 | P51881 | 23  | DFLAGGVAAAISK(*)TAVAPIER(*)      | K13 | 59.74 | 1000   | 0.9130434 | 1        | 1        | 0.9710145 |
| Slc25a5 | P51881 | 23  | ISK(*)TAVAPIER(*)                | K3  | 56.7  | 1000   | 1.0108695 | 0.785714 | 0.644444 | 0.8136761 |
| Slc25a5 | P51881 | 23  | AISK(*)TAVAPIER(*)               | K4  | 47.83 | 1000   | -         | 1        | -        | -         |
| Slc25a5 | P51881 | 163 | GLGDC(+57.02)LVK(*)IYK(*)        | K8  | 46.43 | 55.63  | 0.9673913 | 0.457142 | 0.822222 | 0.7489188 |
| Slc25a5 | P51881 | 33  | VK(*)LLLQVQHASK(*)               | K2  | 29.24 | 58.09  | -         | -        | 1.688888 | 1.6888889 |
| Slc25a5 | P51881 | 155 | EFK(*)GLGDC(+57.02)LVK(*)        | K3  | 24.82 | 132.11 | 6.3478260 | 15.74285 | 5.855555 | 9.3154129 |
| Slc25a5 | P51881 | 23  | AAISK(*)TAVAPIER(*)              | K5  | 22.48 | 1000   | -         | 0.257142 | -        | -         |
| Slc25a5 | P51881 | 199 | AAYFGIYDTAK(*)GMLPDPK(*)         | K11 | 22.45 | 78.16  | 0.8043478 | -        | 1.377777 | 1.0910628 |
| Slc25a5 | P51881 | 23  | GVAAAISK(*)TAVAPIER(*)           | K8  | 9.14  | 1000   | -         | 1.214285 | -        | -         |
| Kpna2   | P52293 | 388 | LVGVLSK(*)ADFK(*)                | K7  | 89.18 | 88.98  | 0.8735632 | 0.802631 | 0.956043 | 0.8774129 |
| Usp10   | P52479 | 506 | LLTVIK(*)SSLSEK(*)               | K6  | 63.33 | 76.27  | 0.8387096 | 0.742424 | 0.86     | 0.8137113 |
| Usp10   | P52479 | 696 | LVK(*)NIDYPVDLEISR(*)            | K3  | 50.26 | 1000   | 0.9462365 | -        | 0.89     | 0.9181183 |
| Usp10   | P52479 | 687 | FVYEK(*)TGGC(+57.02)QK(*)        | K5  | 22.63 | 78.19  | 1.7849462 | 1.621212 | 0.63     | 1.3453861 |
| Pkm     | P52480 | 66  | EMIK(*)SGMNVAR(*)                | K4  | 98.28 | 1000   | 0.9255319 | 0.7375   | 0.956043 | 0.8730253 |
| Pkm     | P52480 | 89  | LNFSHGTHEYHAETIK(*)NVR(*)        | K16 | 93.91 | 1000   | 0.9255319 | 0.825    | 1.131868 | 0.9608    |
| Pkm     | P52480 | 270 | IISK(*)IENHEGVR(*)               | K4  | 87.95 | 1000   | 1.0638297 | 0.925    | 0.956043 | 0.9816246 |
| Pkm     | P52480 | 498 | VNLAMDVGK(*)AR(*)                | K9  | 85.53 | 1000   | 0.8617021 | 0.8      | 0.967032 | 0.876245  |
| Pkm     | P52480 | 166 | NIC(+57.02)K(*)VVEVGSK(*)        | K4  | 69.52 | 120.29 | 0.8510638 | 0.7125   | 0.912087 | 0.8252172 |
| Pkm     | P52480 | 141 | GATLK(*)ITLDNAYMEK(*)            | K5  | 67.57 | 111.69 | -         | -        | 0.648351 | 0.648     |
| Pkm     | P52480 | 433 | SGAIIVLTK(*)SGR(*)               | K9  | 67.3  | 1000   | 1.0319148 | 0.75     | 0.890109 | 0.8906749 |
| Pkm     | P52480 | 433 | C(+57.02)C(+57.02)SGAIIVLTK(*)SC | K11 | 66.45 | 1000   | 0.9893617 | 0.85     | 1.076923 | 0.9720949 |

|        |        |     |                                 |     |       |        |           |          |          |           |
|--------|--------|-----|---------------------------------|-----|-------|--------|-----------|----------|----------|-----------|
| Pkm    | P52480 | 3   | PK(*)PHSEAGTAFIQ TQQLHAAMADT    | K2  | 56.83 | 1000   | 0.8510638 | -        | 1.054945 | 0.9530044 |
| Pkm    | P52480 | 115 | PVAVALDTK(*)GPEIR(*)            | K9  | 38.83 | 1000   | 1.0851063 | 1.05     | 1.164835 | 1.0999805 |
| Pkm    | P52480 | 270 | ISK(*)IENHEGVR(*)               | K3  | 16.19 | 1000   | 1.2021276 | 1.025    | 1.065934 | 1.0976872 |
| Ndufs6 | P52503 | 100 | ETK(*)TGTC(+57.02)GYC(+57.02)GL | K3  | 18.88 | 100.3  | 1.4831460 | 1.493670 | 1.033333 | 1.3367168 |
| Stat6  | P52633 | 613 | DLAQLK(*)NLYPK(*)               | K6  | 15.84 | 45.16  | -         | -        | 1.2      |           |
| Cpt2   | P52825 | 495 | QYGQTVATYESC(+57.02)STA AFK(*)  | K18 | 26.39 | 1000   | 0.9313725 | 1.56     | -        | 1.2456863 |
| Rpl10a | P53026 | 147 | FPSLLTHNENMVAK(*)VDEVK(*)       | K14 | 71.27 | 38.19  | 0.9247311 | 0.602409 | 0.849462 | 0.7922011 |
| Rpl10a | P53026 | 152 | VDEVK(*)STIK(*)                 | K5  | 68.13 | 61.37  | 0.7956989 | 0.722891 | 0.827956 | 0.7821825 |
| Rpl10a | P53026 | 207 | ALYIK(*)STM GK(*)PQR(*)         | K5  | 60.42 | 86.16  | 0.7849462 | 0.746987 | 0.795698 | 0.7758777 |
| Rpl10a | P53026 | 207 | ALYIK(*)STM GK(*)               | K5  | 20.87 | 98.37  | 0.8172043 | 0.783132 | 0.978494 | 0.8596105 |
| Dbt    | P53395 | 265 | AMVK(*)TMSAALK(*)               | K4  | 23.61 | 53.43  | 1.0329670 | 0.536585 | -        | 0.7847762 |
| Cebpz  | P53569 | 390 | ALLVQVINK(*)LGDPQNR(*)          | K9  | 34.18 | 1000   | 1.7010309 | -        | 0.842696 | 1.2718638 |
| Cebpz  | P53569 | 401 | IATK(*)ASHLLEVLLR(*)            | K4  | 15.49 | 1000   | 1.0412371 | -        | -        |           |
| Hccs   | P53702 | 264 | MK(*)VAWWR(*)                   | K2  | 5.88  | 1000   | -         | -        | 1.428571 | 1.429     |
| Pitpna | P53810 | 117 | IETWHK(*)PDLGTQENVHK(*)         | K6  | 77.87 | 159.14 | 0.82      | 0.792207 | 1.172413 | 0.9282072 |
| Pitpna | P53810 | 202 | FK(*)WWGLQNK(*)                 | K2  | 69.52 | 148.49 | -         | 0.636363 | 0.839080 | 0.737722  |
| Pitpna | P53810 | 68  | IYHLQSK(*)VPTFVR(*)             | K7  | 59.47 | 1000   | 0.94      | 0.831168 | 1.149425 | 0.9735314 |
| Pitpnb | P53811 | 201 | FK(*)WWGLQSK(*)                 | K2  | 68.97 | 157.88 | 0.8842105 | -        | 0.902173 | 0.8931922 |
| Pitpnb | P53811 | 67  | SK(*)VPAFVR(*)                  | K2  | 56.78 | 1000   | 1.0105263 | 0.710526 | 0.706521 | 0.8091915 |
| Rab2a  | P53994 | 120 | LIGNK(*)SDLESR(*)               | K5  | 26.41 | 1000   | -         | -        | 0.629213 | 1.3483    |
| Rab2a  | P53994 | 120 | QHSNSNMVIMLIGNK(*)SDLESR(*)     | K15 | 9.73  | 1000   | 1.1122448 | -        | -        |           |
| Anapc1 | P53995 | 143 | IYK(*)SHELEK(*)                 | K3  | 37.01 | 56.47  | -         | -        | 0.903225 | 1.5806    |
| Anapc1 | P53995 | 107 | GSK(*)SQALAVYK(*)               | K3  | 8.81  | 78.17  | -         | 0.141025 | -        |           |
| Cnbp   | P53996 | 104 | EQC(+57.02)C(+57.02)YNC(+57.02) | K9  | 83.71 | 1000   | 0.8834951 | 0.875    | 0.771739 | 0.8434114 |
| Cnbp   | P53996 | 153 | C(+57.02)GETGHVAINC(+57.02)SK(  | K13 | 80.44 | 1000   | 0.9902912 | 1.05     | 1.043478 | 1.0279232 |
| Cnbp   | P53996 | 153 | VAINC(+57.02)SK(*)TSEVNC(+57.02 | K7  | 31.28 | 1000   | 1.1844660 | 0.975    | 1.206521 | 1.1219959 |
| Cnbp   | P53996 | 104 | ER(*)EQC(+57.02)C(+57.02)YNC(+5 | K11 | 26.73 | 1000   | 1.0679611 | 1.2625   | -        | 1.1652306 |
| Idh2   | P54071 | 272 | DIFQEIFDK(*)HYK(*)              | K9  | 82.89 | 49.37  | 0.9791666 | 0.727272 | 0.966292 | 0.8909105 |
| Idh2   | P54071 | 180 | HAHG DQYK(*)ATDFV VDR(*)        | K8  | 79.24 | 1000   | 0.9375    | 0.857142 | 0.943820 | 0.912821  |
| Idh2   | P54071 | 155 | EPIIC(+57.02)K(*)NIPR(*)        | K6  | 78.33 | 1000   | 1.3541666 | 0.727272 | 0.921348 | 1.0009292 |
| Idh2   | P54071 | 251 | WPLYLSTK(*)NTILK(*)             | K8  | 77.06 | 53.48  | 0.8020833 | -        | 0.910112 | 0.8560978 |
| Idh2   | P54071 | 282 | NK(*)IWYEHR(*)                  | K2  | 74.28 | 1000   | 0.8645833 | 1.012987 | 1.033707 | 0.9704261 |
| Idh2   | P54071 | 133 | MWK(*)SPNGTIR(*)                | K3  | 24.76 | 1000   | -         | -        | 0.966292 | 1.135     |
| Dnajc2 | P54103 | 85  | DWK(*)NQDHYAVLGLGHVR(*)         | K3  | 36.84 | 1000   | 0.9423076 | -        | -        |           |

|        |        |      |                               |     |       |        |           |          |           |           |
|--------|--------|------|-------------------------------|-----|-------|--------|-----------|----------|-----------|-----------|
| Dnajc2 | P54103 | 117  | AMVLK(*)HHPDK(*)              | K5  | 29.45 | 45.16  | 0.7403846 | 0.551282 | 0.765957  | 0.6858747 |
| Stmn1  | P54227 | 128  | DK(*)HVEEVR(*)                | K2  | 56.89 | 1000   | 1.375     | 0.885057 | 1.023809  | 1.0946223 |
| Stmn1  | P54227 | 128  | EK(*)DK(*)HVEEVR(*)           | K4  | 11.81 | 22.85  | -         | 0.701149 | -         | -         |
| Msh6   | P54276 | 821  | LLSK(*)IHNVGSPK(*)            | K4  | 54.95 | 202.16 | 1.0505050 | 0.935897 | 0.897727  | 0.9613766 |
| Msh6   | P54276 | 169  | GGHFYSSK(*)SEILR(*)           | K8  | 39.98 | 1000   | 1.1515151 | 1.076923 | 1.204545  | 1.1443279 |
| Rad23b | P54728 | 6    | MQVTLK(*)TLQQQTFK(*)          | K6  | 81.52 | 216.51 | 0.9782608 | 0.945205 | 1.011363  | 0.9782767 |
| Rad23b | P54728 | 36   | GK(*)DAFPVAGQK(*)             | K2  | 48.15 | 161.68 | 0.3260869 | 0.986301 | 1         | 0.7707961 |
| Rad23b | P54728 | 67   | IDEK(*)NFVVVMVTK(*)PK(*)      | K4  | 45.33 | 143.22 | -         | -        | 0.8522727 | 0.8522727 |
| Faf1   | P54731 | 145  | GWK(*)TGDVEDSTVLK(*)          | K3  | 35.42 | 134.4  | 0.7311827 | -        | -         | -         |
| Psmc4  | P54775 | 212  | GVLMYGPPGC(+57.02)GK(*)TMLAK  | K12 | 15.69 | 21.59  | 0.8478260 | -        | -         | -         |
| Psmc4  | P54775 | 404  | AYK(*)TVIK(*)                 | K3  | 7.35  | 87.62  | -         | -        | 1.3260869 | 1.3260869 |
| Ddx6   | P54823 | 321  | QK(*)VHC(+57.02)LNTLFSR(*)    | K2  | 34.93 | 1000   | -         | -        | 1.1477272 | 1.1477272 |
| Ddx6   | P54823 | 146  | NGTGGK(*)SGAYLIPLLR(*)        | K5  | 13.18 | 1000   | -         | 1.342105 | -         | -         |
| Adprh  | P54923 | 90   | LYSLLAK(*)HYR(*)              | K7  | 81.56 | 1000   | 1.2467532 | 1.013333 | 1.010869  | 1.0903187 |
| Abcd3  | P55096 | 61   | AVVDK(*)VFSLR(*)              | K5  | 40.3  | 1000   | 0.6701030 | 0.764705 | 0.988636  | 0.8078151 |
| Kmt2a  | P55200 | 3459 | GNQLLAGK(*)TGTLTSQR(*)        | K8  | 80.3  | 1000   | -         | 0.354037 | -         | -         |
| Kmt2a  | P55200 | 1200 | C(+57.02)QNLQWMPSK(*)ASLQK(*) | K10 | 59.74 | 20.54  | -         | 0.285714 | -         | -         |
| Kmt2a  | P55200 | 1200 | K(*)C(+57.02)QNLQWMPSK(*)ASLC | K11 | 36.73 | 29.88  | -         | 0.422360 | -         | -         |
| Adk    | P55264 | 60   | YSLK(*)PNDQILAEDK(*)HK(*)     | K14 | 68.55 | 39.76  | 0.9484536 | 0.851851 | 0.645161  | 0.8151556 |
| Adk    | P55264 | 73   | FK(*)VEYHAGGSTQNSMK(*)        | K2  | 39.77 | 105.23 | -         | -        | 0.8817204 | 0.8817204 |
| Adk    | P55264 | 164  | EK(*)HLDLR(*)                 | K2  | 39.17 | 1000   | 1.0721649 | 1.111111 | 0.709677  | 0.9643178 |
| Adk    | P55264 | 87   | SMK(*)VAQWLIQEPHK(*)          | K3  | 30.49 | 156.9  | -         | -        | 0.8387096 | 0.8387096 |
| Lrpap1 | P55302 | 216  | IK(*)SDTLISK(*)               | K2  | 63.78 | 122.76 | 1.0384615 | 1.038461 | 0.908163  | 0.9950288 |
| Lrpap1 | P55302 | 309  | LK(*)HVESIGDPEHISR(*)         | K2  | 61.45 | 1000   | 1.2980769 | 1.025641 | 1.051020  | 1.1249128 |
| Lrpap1 | P55302 | 223  | SDTLISK(*)HSELK(*)            | K7  | 47.95 | 115.97 | 1.0769230 | 0.961538 | 0.969387  | 1.0026164 |
| Lrpap1 | P55302 | 293  | IEK(*)HNHYQK(*)               | K3  | 39.69 | 129.72 | -         | -        | 1.0306122 | 1.0306122 |
| Golga3 | P55937 | 816  | QDLAVK(*)SNQVEHLQQETATLR(*)   | K6  | 39.11 | 1000   | -         | -        | 0.7777777 | 0.7777777 |
| Golga3 | P55937 | 1353 | VSELK(*)NNMK(*)               | K5  | 22.39 | 55.36  | -         | -        | 0.4242424 | 0.4242424 |
| Cks2   | P56390 | 34   | QVPK(*)THLMSEEEWR(*)          | K4  | 42.82 | 1000   | -         | 0.781609 | 0.914893  | 0.8482514 |
| Cox6b1 | P56391 | 13   | NYK(*)TAPFDSR(*)              | K3  | 88.66 | 1000   | 0.6736842 | 0.860759 | 0.977777  | 0.8374072 |
| Cox6b1 | P56391 | 47   | AMTAK(*)GGDVSVLC(+57.02)EWYR  | K5  | 63.4  | 1000   | 1.0210526 | 0.734177 | 1.133333  | 0.9628544 |
| Cox6b1 | P56391 | 28   | FPNQNQTK(*)NC(+57.02)WQNYLDI  | K8  | 25.32 | 1000   | -         | -        | 1.8888888 | 1.8888888 |
| Cyb5a  | P56395 | 19   | YTTLEEIQK(*)HK(*)             | K9  | 68.04 | 25.86  | 1.0612244 | 0.862068 | 0.894736  | 0.9393434 |
| Cyb5a  | P56395 | 24   | DSK(*)STWVILHHK(*)            | K3  | 66.35 | 126.05 | 1.0306122 | 0.873563 | 0.936842  | 0.9470059 |

|         |        |     |                               |     |       |        |           |          |                    |
|---------|--------|-----|-------------------------------|-----|-------|--------|-----------|----------|--------------------|
| Cyb5a   | P56395 | 33  | STWVILHHK(*)VYDLTK(*)         | K9  | 61.51 | 30.85  | 0.8877551 | -        | 0.968421(0.9280881 |
| Cyb5a   | P56395 | 77  | ELSK(*)TYIIGELHPDDR(*)        | K4  | 17.03 | 1000   | -         | -        | 1.115789474        |
| Usp5    | P56399 | 291 | TDK(*)TMTELEIDMNQR(*)         | K3  | 49.79 | 1000   | 0.8210526 | 1.455696 | 0.648936(0.9752283 |
| Usp5    | P56399 | 178 | QVSK(*)HAFNLK(*)              | K4  | 29.19 | 95.35  | -         | 0.645569 | 0.478723(0.5621465 |
| Usp5    | P56399 | 423 | ALIGK(*)GHPEFSTNR(*)          | K5  | 21.83 | 1000   | 1.2       | -        | -                  |
| Atp5f1b | P56480 | 264 | DATSK(*)VALVYGQMNEPPGAR(*)    | K5  | 57.97 | 1000   | 0.9479166 | 0.4625   | 1.085106(0.831841  |
| Pdcd5   | P56812 | 20  | LAELQAK(*)HGDPGDAAQQEAK(*)    | K7  | 79.62 | 166.43 | 0.6698113 | 1.075    | 0.806451(0.850421  |
| Fus     | P56959 | 444 | APK(*)PDGPGGGPGGSHMGGNYGC     | K3  | 87.59 | 1000   | 0.9756097 | 0.888888 | 0.880952(0.9151503 |
| Fus     | P56959 | 305 | QIGLIK(*)TNK(*)               | K6  | 57.86 | 20.7   | 1.0121951 | -        | 0.809523(0.9108595 |
| Fus     | P56959 | 327 | LK(*)GEATVSFDDPPSAK(*)        | K2  | 10.79 | 39.94  | 1.4390243 | -        | -                  |
| Exosc10 | P56960 | 875 | SMSFAVGK(*)SDR(*)             | K8  | 25.83 | 1000   | -         | 1.402597 | -                  |
| Exosc10 | P56960 | 867 | QSVGNK(*)SMSFAVGK(*)          | K6  | 17.3  | 74.79  | 2.0740740 | -        | 1.052083(1.5630787 |
| Erp29   | P57759 | 38  | LHTK(*)GALPLDVTIFYK(*)        | K4  | 28.71 | 128.19 | -         | -        | 1.536842105        |
| Eef1d   | P57776 | 10  | A(+42.01)TNFLAHEK(*)IWFDK(*)  | K9  | 75.32 | 127.18 | -         | -        | 1.280898876        |
| Eef1d   | P57776 | 17  | FK(*)YDDAER(*)                | K2  | 71.16 | 1000   | 1.2210526 | 1.277108 | 1.258426(1.252196  |
| Eef1d   | P57776 | 117 | LSSLEK(*)SSPTPR(*)            | K6  | 56.41 | 1000   | 0.7789473 | -        | 0.741573(0.7602602 |
| Eef1d   | P57776 | 59  | ENIQK(*)SLAGSSGPGASSGPGGDHS   | K5  | 56.11 | 1000   | 0.7473684 | -        | 1.539325(1.1433471 |
| Actn4   | P57780 | 284 | IC(+57.02)K(*)VLAVNQENEHLMEDY | K3  | 64.09 | 1000   | 0.9791666 | 0.858974 | 1.076923(0.971688  |
| Actn4   | P57780 | 626 | WEK(*)VQQLVPK(*)              | K3  | 61.81 | 148.49 | 0.7916666 | 0.846153 | 0.857142(0.8316545 |
| Actn4   | P57780 | 780 | ASFNFHFDK(*)DHGGALGPPEEFK(*)  | K8  | 54.5  | 157.14 | 1.5833333 | 0.833333 | 1                  |
| Actn4   | P57780 | 115 | INNPNK(*)ALDFIASK(*)          | K6  | 48.07 | 99.23  | 0.9270833 | 1.141025 | 0.868131(0.9787469 |
| Actn4   | P57780 | 761 | DAK(*)GISQEQMQEFR(*)          | K3  | 46.65 | 1000   | 0.9583333 | -        | 0.736263(0.8472985 |
| Actn4   | P57780 | 182 | TAPYK(*)NVNVQNFHISWK(*)       | K5  | 46.2  | 93.92  | 1.15625   | 0.5      | 1.054945(0.9037317 |
| Actn4   | P57780 | 669 | MVGPWIQTK(*)MEEIGR(*)         | K9  | 40.22 | 1000   | 0.46875   | -        | 0.835164(0.6519574 |
| Actn4   | P57780 | 433 | ASIHEAWTDGK(*)EAMLK(*)        | K11 | 35.03 | 98.37  | 0.9270833 | 0.871794 | 0.934065(0.9109814 |
| Snrpa1  | P57784 | 67  | LK(*)TLLVNNNR(*)              | K2  | 94.04 | 1000   | 0.8865979 | 0.925925 | 0.989010(0.933845  |
| Snrpa1  | P57784 | 179 | SK(*)TFNPGAGLPTDK(*)          | K2  | 76.04 | 151.17 | 1.5670103 | 0.851851 | -                  |
| Snrpa1  | P57784 | 221 | LK(*)GLLQSGQIPGR(*)           | K2  | 12.93 | 1000   | -         | -        | 1.967032967        |
| Tm9sf2  | P58021 | 422 | FYK(*)SFGGEK(*)               | K3  | 75.5  | 66.56  | 0.7659574 | 0.5875   | 0.931818(0.7617585 |
| Tm9sf2  | P58021 | 125 | LVC(+57.02)TK(*)TYNTEK(*)     | K5  | 73.4  | 129.72 | 0.8617021 | 0.675    | 0.863636(0.8001128 |
| Mrps6   | P58064 | 95  | IVK(*)HPLTQEVK(*)             | K3  | 29.97 | 81.59  | -         | -        | 0.739130435        |
| Eef2    | P58252 | 275 | FSK(*)SANSPDGK(*)             | K3  | 98.66 | 166.48 | 0.9368421 | 0.9      | 0.936170(0.9243374 |
| Eef2    | P58252 | 32  | NM(+15.99)SVIAHVDHGK(*)STLTD  | K12 | 94.77 | 103.7  | 1.1052631 | 0.9625   | 0.989361(1.0190416 |
| Eef2    | P58252 | 598 | SPNK(*)HNR(*)                 | K4  | 90.93 | 1000   | 0.9263157 | 0.8125   | 0.893617(0.8774776 |

|         |        |     |                                    |     |       |        |           |          |                    |
|---------|--------|-----|------------------------------------|-----|-------|--------|-----------|----------|--------------------|
| Eef2    | P58252 | 426 | VFSGVVSTGLK(*)VR(*)                | K11 | 73.68 | 1000   | 0.8526315 | 0.825    | 0.787234(0.8216219 |
| Eef2    | P58252 | 152 | IK(*)PVLMMNK(*)                    | K2  | 66.91 | 106.82 | 0.6947368 | 0.7875   | 0.904255(0.7954974 |
| Eef2    | P58252 | 481 | LVK(*)TGTTTFEHAHNMR(*)             | K3  | 60.48 | 1000   | -         | 1.75     | 0.861702(1.3058511 |
| Eef2    | P58252 | 32  | VDHGK(*)STLTDSLVC(+57.02)K(*)      | K5  | 59.03 | 129.4  | 1.1052631 | 0.75     | 0.734042(0.8631019 |
| Eef2    | P58252 | 386 | YR(*)C(+57.02)ELLYEGPPDDEAAMC      | K20 | 55.68 | 29.88  | -         | -        | 0.957446809        |
| Eef2    | P58252 | 32  | MSVIAHVDHGK(*)STLTDSLVC(+57.02)K11 | K11 | 39.29 | 59.2   | -         | -        | 0.840425532        |
| Eef2    | P58252 | 239 | FAAK(*)GEGQLSAAER(*)               | K4  | 18.72 | 1000   | 0.8       | -        | 0.436170(0.6180851 |
| Opa1    | P58281 | 847 | HFLK(*)TALNHC(+57.02)NLC(+57.02)K4 | K4  | 24.59 | 1000   | 1.7373737 | 0.897435 | 0.543689(1.0594997 |
| Rnf216  | P58283 | 22  | GK(*)EWMMAVR(*)                    | K2  | 46.7  | 1000   | -         | -        | -                  |
| Ptpa    | P58389 | 296 | MYK(*)AEC(+57.02)LEK(*)            | K3  | 84.51 | 116.54 | 1.0930232 | 1        | 1.15 1.0810078     |
| Ptpa    | P58389 | 286 | ISAVPSWSK(*)VNQGLIR(*)             | K9  | 40.79 | 1000   | 0.8255813 | 0.986842 | 1.7375 1.1833078   |
| Ptpa    | P58389 | 286 | TGPFAEHSNQLWNISAVPSWSK(*)VN        | K22 | 20.85 | 1000   | -         | -        | 1.05               |
| Foxp1   | P58462 | 538 | NAATWK(*)NAVR(*)                   | K6  | 32.05 | 1000   | -         | 1.101265 | 1.252427(1.1768465 |
| Paxbp1  | P58501 | 252 | ELGDFTPHDSEPGK(*)GR(*)             | K14 | 21.36 | 1000   | -         | 1.524590 | 0.902777(1.213684  |
| Aaas    | P58742 | 373 | GHVGGAK(*)SATIVADLSETTIQTPDG       | K7  | 26.16 | 1000   | 0.5434782 | -        | 0.577777(0.560628  |
| Aaas    | P58742 | 189 | VYNANSTIVPSLK(*)HR(*)              | K13 | 21.33 | 1000   | 1.5217391 | 1.384615 | - 1.4531773        |
| Tpm1    | P58771 | 152 | EAK(*)HIAEDADR(*)                  | K3  | 96.49 | 1000   | 1.0106382 | 0.961038 | 1.011764(0.9944807 |
| Tpm1    | P58771 | 205 | TVTNNLK(*)SLEAQAEK(*)              | K7  | 70.04 | 131.34 | 0.8297872 | 1.051948 | 0.941176(0.9409706 |
| Tpm1    | P58771 | 248 | SVTK(*)LEK(*)                      | K4  | 48.6  | 56.34  | 1.0212765 | 1.402597 | 1.070588(1.1648207 |
| Tpm1    | P58771 | 189 | AELSEGK(*)C(+57.02)AELEEELK(*)     | K7  | 43.84 | 128    | -         | 0.922077 | 1.847058(1.3845684 |
| Tpm1    | P58771 | 51  | LK(*)GTEDELDK(*)YSEALK(*)          | K2  | 21.99 | 81.34  | 1.6276595 | 1.636363 | 1.188235(1.4840862 |
| Tpm1    | P58771 | 220 | EDK(*)YEEIEK(*)                    | K3  | 4.34  | 41.94  | -         | -        | 1.682352941        |
| Tpm2    | P58774 | 152 | EAK(*)HIAEDSDR(*)                  | K3  | 85.19 | 1000   | 0.6526315 | 0.960526 | 1.080459(0.8978726 |
| Ripk2   | P58801 | 47  | VAVK(*)HLHIHTPLLDSEK(*)            | K4  | 23.35 | 1000   | -         | -        | -                  |
| Tubgcp3 | P58854 | 509 | MIAVTK(*)SAESPR(*)                 | K6  | 29.03 | 1000   | 2.7111111 | -        | 0.645161(1.6781362 |
| Tubgcp3 | P58854 | 377 | LK(*)TLAALVDHC(+57.02)QGR(*)       | K2  | 24.83 | 1000   | 1.3       | -        | 0.956989(1.1284946 |
| Tubgcp3 | P58854 | 486 | VLLIGK(*)SINFLHQVC(+57.02)HDQ      | K6  | 16.77 | 32.61  | 1.1333333 | -        | 0.903225(1.0182796 |
| Gmeb2   | P58929 | 136 | EFVHLAGK(*)STLK(*)                 | K8  | 25.68 | 69.71  | -         | -        | 0.602484472        |
| Bcl2l13 | P59017 | 57  | LK(*)SEIEEELK(*)                   | K2  | 10.72 | 113.97 | -         | 1.844155 | 1.467391(1.6557736 |
| Nup43   | P59235 | 196 | SIGQLK(*)IWDFFR(*)                 | K6  | 8.6   | 1000   | 1.0842105 | -        | -                  |
| Eif5    | P59325 | 136 | GMLDTHHK(*)LC(+57.02)TFILK(*)      | K8  | 81.11 | 34.69  | 0.8854166 | 0.876712 | 1.087912(0.9500137 |
| Ythdf1  | P59326 | 387 | EFDWNLK(*)SGR(*)                   | K7  | 35.58 | 1000   | -         | -        | 0.986486486        |
| Wdhd1   | P59328 | 664 | GK(*)SDHYWVVGIIHENPQQLR(*)         | K2  | 61.82 | 1000   | 1.2682926 | 1.808219 | 1.253012(1.4431746 |
| Sirt6   | P59941 | 93  | PSK(*)THMALVQLER(*)                | K3  | 61.91 | 1000   | -         | -        | -                  |



|         |        |     |                                 |     |       |        |           |          |                     |
|---------|--------|-----|---------------------------------|-----|-------|--------|-----------|----------|---------------------|
| Sirt6   | P59941 | 267 | LMK(*)HLGLEIPAWDGPC(+57.02)V    | K3  | 40.23 | 157.13 | -         | -        | -                   |
| Ruvbl1  | P60122 | 162 | TISHVIIGLK(*)TAK(*)             | K10 | 39.37 | 44.44  | 1.1649484 | 0.782051 | 1.1666666(1.0378888 |
| Ruvbl1  | P60122 | 22  | IASHSHVK(*)GLGLDESLAK(*)        | K8  | 27.19 | 63.07  | 1.2371134 | -        | 1.4666666(1.35189   |
| Eif3e   | P60229 | 409 | TK(*)SLSFR(*)                   | K2  | 84.1  | 1000   | 1.0638297 | 0.9125   | -0.9881649          |
| Eif3e   | P60229 | 120 | MLFDYLADK(*)HGFR(*)             | K9  | 81.15 | 1000   | 1.0531914 | 0.9      | 1.021978(0.9917232  |
| Eif3e   | P60229 | 387 | IDSK(*)LGHVVMGNNAVSPYQQVIEK     | K4  | 39.93 | 111.38 | -         | -        | 0.516483516         |
| Eif3e   | P60229 | 359 | MLADK(*)LNMTPEEAER(*)           | K5  | 29.6  | 1000   | 0.9574468 | -        | 0.802197(0.8798223  |
| Pcbp1   | P60335 | 23  | LLMHGK(*)EVGSIIGK(*)            | K6  | 49.76 | 183.32 | 0.8777777 | 1.283783 | 1.035714(1.0657586  |
| Nploc4  | P60670 | 52  | NK(*)TGEITASSSK(*)              | K2  | 37.89 | 187.15 | 0.9058823 | 1.123456 | 0.951219(0.9935196  |
| Actb    | P60710 | 328 | IK(*)IIAPPER(*)                 | K2  | 99.25 | 1000   | 0.8144329 | 0.819277 | 0.911111(0.8482737  |
| Actb    | P60710 | 359 | WISK(*)QEYDESGPSIVHR(*)         | K4  | 98.76 | 1000   | 0.9072164 | 0.674698 | 10.8606384          |
| Actb    | P60710 | 113 | VAPEEHPVLLTEAPLNPK(*)ANR(*)     | K18 | 93.09 | 1000   | 0.7525773 | 0.734939 | 1.255555(0.9143575  |
| Actb    | P60710 | 359 | ISK(*)QEYDESGPSIVHR(*)          | K3  | 92.41 | 1000   | 1.1340206 | 1.036144 | 0.888888(1.0196847  |
| Actb    | P60710 | 359 | QQMWISK(*)QEYDESGPSIVHR(*)      | K7  | 77.43 | 1000   | 0.8556701 | 0.759036 | 0.988888(0.867865   |
| Actb    | P60710 | 359 | MWISK(*)QEYDESGPSIVHR(*)        | K5  | 66.38 | 1000   | 0.9793814 | 0.915662 | 1.111111(1.0020517  |
| Actb    | P60710 | 215 | EK(*)LC(+57.02)YVALDFEQEM(+15.1 | K2  | 49.51 | 242.12 | -         | -        | 1.133333333         |
| Actb    | P60710 | 50  | HQGVVMVGMGQK(*)DSYVGDEAQS       | K11 | 22.31 | 118.56 | -         | -        | 1.155555556         |
| Actb    | P60710 | 359 | STFQQMWISK(*)QEYDESGPSIVHR(*    | K10 | 14.96 | 1000   | -         | -        | 1.488888889         |
| Morf4l1 | P60762 | 143 | TSGLQK(*)NVEVK(*)               | K7  | 10.72 | 62.08  | -         | 1.888888 | -                   |
| Cdc42   | P60766 | 163 | YVEC(+57.02)SALTQK(*)GLK(*)     | K10 | 81.52 | 42.6   | 0.7446808 | 0.756410 | 0.890109(0.797067   |
| Eif4a1  | P60843 | 54  | GIYAYGFEEK(*)PSAIQQR(*)         | K9  | 50.46 | 1000   | 1.0531914 | 0.875    | -0.9640957          |
| Eif4a1  | P60843 | 174 | YLSPK(*)YIK(*)                  | K5  | 47.24 | 22.45  | 0.9042553 | 0.85     | 0.752688(0.8356478  |
| Eif4a1  | P60843 | 68  | IK(*)GYDVIAQAQSGTGK(*)          | K2  | 22.46 | 179.33 | 1.1914893 | -        | -                   |
| Rps20   | P60867 | 59  | MPTK(*)TLR(*)                   | K4  | 95.16 | 1000   | 0.96      | 1.012658 | 0.820.9308861       |
| Rps20   | P60867 | 75  | TPC(+57.02)GEGSK(*)TWDR(*)      | K8  | 64.46 | 1000   | 0.82      | 0.772151 | 0.810.8007173       |
| Rps20   | P60867 | 75  | K(*)TPC(+57.02)GEGSK(*)TWDR(*)  | K9  | 45.71 | 64     | 0.8       | 0.987341 | 0.790.8591139       |
| Chp1    | P61022 | 114 | SNK(*)LHFAFR(*)                 | K3  | 37.81 | 1000   | -         | 0.839506 | 1.357142(1.0983245  |
| Cks1b   | P61025 | 34  | LVPK(*)THLMSESEWR(*)            | K4  | 76.72 | 1000   | 0.9803921 | 0.948717 | 1.055555(0.9948886  |
| Rab10   | P61027 | 49  | IK(*)TVELQGK(*)                 | K2  | 79.13 | 157.88 | 0.7802197 | 0.765432 | 0.918604(0.8214188  |
| Rab10   | P61027 | 136 | GK(*)GEQIAR(*)                  | K2  | 9.04  | 1000   | -         | -        | 1.255813953         |
| Rab8b   | P61028 | 3   | A(+42.01)K(*)TYDYLFK(*)         | K2  | 10.16 | 140.21 | 0.7340425 | -        | 0.627906(0.6809748  |
| Ube2m   | P61082 | 72  | LVIC(+57.02)PDEGFYK(*)SGK(*)    | K11 | 81.32 | 40.63  | 0.8804347 | 0.807692 | 0.752380(0.8135027  |
| Ube2k   | P61087 | 24  | SEETSK(*)NQIK(*)                | K6  | 50.89 | 77.51  | 0.7659574 | -        | 0.887640(0.8267989  |
| Ube2n   | P61089 | 74  | FMTK(*)IYHPNVDK(*)              | K4  | 87.69 | 197.82 | 1         | 0.933333 | 0.954022(0.9624521  |

|        |        |     |                               |     |       |        |           |          |                    |
|--------|--------|-----|-------------------------------|-----|-------|--------|-----------|----------|--------------------|
| Ube2n  | P61089 | 94  | DK(*)WSPALQIR(*)              | K2  | 25.03 | 1000   | -         | -        | 1.459770115        |
| Ube2n  | P61089 | 82  | IYHPNVDK(*)LGR(*)             | K8  | 24.87 | 1000   | -         | -        | 1.126436782        |
| Actr2  | P61161 | 299 | SEFYK(*)HIVLSGGSTMYPGLPSR(*)  | K5  | 91.06 | 1000   | 0.9473684 | -        | 0.90109850.9242337 |
| Actr2  | P61161 | 368 | DK(*)DNFWMTR(*)               | K2  | 76.17 | 1000   | 1         | 0.7625   | 0.97802150.9135073 |
| Actr2  | P61161 | 118 | ILLTEPPMNPTK(*)NR(*)          | K12 | 58.89 | 1000   | 0.6210526 | -        | 0.83516450.7281087 |
| Actr2  | P61161 | 219 | EK(*)LC(+57.02)YVGYNIEQEQQ(*) | K2  | 50.83 | 221.44 | 0.6631578 | -        | 0.94505450.8041064 |
| Actr1a | P61164 | 285 | AIQK(*)SDMDLR(*)              | K4  | 81.52 | 1000   | 0.6542056 | 0.822784 | 0.91111110.7960338 |
| Actr1a | P61164 | 96  | SK(*)DQLQTFSEEHVLLTEAPLNPR(*) | K2  | 42.15 | 1000   | -         | -        | 0.866666667        |
| Cops2  | P61202 | 331 | ILK(*)TNHSNIMDDPFIR(*)        | K3  | 74    | 1000   | 1.0707070 | 2.209876 | 0.94505451.4085462 |
| Cops2  | P61202 | 263 | AHTDFFFAFK(*)NYDESGSPR(*)     | K10 | 62.77 | 1000   | 0.6868686 | -        | 0.92307650.8049728 |
| Cops2  | P61202 | 93  | YK(*)QLLTYIR(*)               | K2  | 55.86 | 1000   | 0.7777777 | 0.888888 | 1.1648350.9438339  |
| Cops2  | P61202 | 150 | LWFK(*)TNTK(*)                | K4  | 39.92 | 51.8   | 0.8585858 | 0.950617 | 0.97802150.929075  |
| Cops2  | P61202 | 225 | IK(*)SAIPHPLIMGVIR(*)         | K2  | 38.81 | 1000   | 0.9090909 | 0.913580 | 10.9408904         |
| Cops2  | P61202 | 243 | EC(+57.02)GGK(*)MHLR(*)       | K5  | 28.99 | 1000   | 1.0505050 | 1.197530 | 1.2197801.1559387  |
| Cops2  | P61202 | 225 | ALYEQSLHIK(*)SAIPHPLIMGVIR(*) | K10 | 11.22 | 1000   | -         | -        | 1.274725275        |
| Cops2  | P61202 | 77  | QMIK(*)INFK(*)                | K4  | 9.51  | 38.26  | 0.7878787 | 0.962962 | -0.8754209         |
| Arl1   | P61211 | 104 | IGISK(*)SELVAMLEEEELR(*)K(*)  | K5  | 21.36 | 132.96 | -         | -        | 0.916666667        |
| Abce1  | P61222 | 419 | ISPK(*)STGSVR(*)              | K4  | 85.01 | 1000   | 0.6       | 0.5625   | 0.67032950.6109432 |
| Abce1  | P61222 | 397 | LK(*)PDEGGEVPVLNVSYK(*)PQK(*) | K2  | 72.9  | 221.1  | 0.73      | 0.7      | 0.87912050.769707  |
| Rpl26  | P61255 | 69  | GQQIGK(*)VVQVYR(*)            | K6  | 97.6  | 1000   | 0.9223300 | 0.987654 | 0.98888880.9662911 |
| Rpl26  | P61255 | 63  | GHYK(*)GQQIGK(*)              | K4  | 71.98 | 132.53 | 0.8834951 | 0.888888 | 0.93333330.9019058 |
| Psme3  | P61290 | 14  | LK(*)VDSFR(*)                 | K2  | 68.8  | 1000   | 0.9361702 | 0.851851 | 0.83673450.8749189 |
| Psme3  | P61290 | 6   | A(+42.01)SLLK(*)VDQEVK(*)     | K5  | 54.02 | 81.36  | 0.8829787 | 0.839506 | 1.3469381.0231412  |
| Psme3  | P61290 | 110 | GMLK(*)SNQQLVDIIEK(*)         | K4  | 39.41 | 232.86 | -         | -        | 1.173469388        |
| Magoh  | P61327 | 16  | GK(*)FGHEFLEFEFR(*)PDGK(*)    | K2  | 61.53 | 135.32 | -         | -        | 1.078651685        |
| Magoh  | P61327 | 41  | YANNSNYK(*)NDVMIR(*)          | K8  | 58.05 | 1000   | -         | 5        | 1.1460673.0730337  |
| Magoh  | P61327 | 54  | EAYVHK(*)SVMEELK(*)R(*)       | K6  | 41.45 | 64.58  | -         | 1.565789 | 1.33707851.4514341 |
| Magoh  | P61327 | 54  | EAYVHK(*)SVMEELK(*)           | K6  | 22.41 | 51.59  | 0.75      | 1.789473 | -1.2697368         |
| Rpl27  | P61358 | 93  | YSVDIPLDK(*)TVVNK(*)          | K9  | 92.81 | 95.62  | 0.8865979 | 0.875    | 0.96666660.9094215 |
| Rpl27  | P61358 | 27  | AVIVK(*)NIDDGTSR(*)           | K5  | 90.36 | 1000   | 0.9175257 | 0.806818 | 10.9081147         |
| Rpl27  | P61358 | 128 | NK(*)WFFQK(*)                 | K2  | 85.1  | 98.37  | 0.8659793 | 0.806818 | 0.93333330.8687103 |
| Rpl27  | P61358 | 27  | AVIVK(*)NIDDGTSR(*)PYSHALVAG  | K5  | 62.8  | 1000   | 2.3402061 | 0.897727 | 1.15555551.4644963 |
| Rpl27  | P61358 | 73  | SFVK(*)VYNYNHLMPTR(*)         | K4  | 54.06 | 1000   | 0.9484536 | 1.079545 | 1.04444441.0241478 |
| Rpl27  | P61358 | 9   | PGK(*)VVLVLAGR(*)             | K3  | 29.8  | 1000   | -         | -        | 0.755555556        |

|        |        |     |                                    |       |        |           |          |             |           |
|--------|--------|-----|------------------------------------|-------|--------|-----------|----------|-------------|-----------|
| Rpl27  | P61358 | 27  | K(*)AVIVK(*)NIDDGTSR(*)PYSHAL' K6  | 18.4  | 52.68  | 1.1443298 | 1.25     | 1.222222    | 1.2055174 |
| Rpl27  | P61358 | 27  | VK(*)NIDDGTSR(*)PYSHALVAGIDF K2    | 7.14  | 1000   | -         | -        | 0.644444444 |           |
| Rpl37a | P61514 | 80  | TTSAVTVK(*)SAIR(*) K8              | 80.44 | 1000   | 0.9207920 | 0.783132 | 0.979591    | 0.8945055 |
| Rpl37a | P61514 | 80  | TVAGGAWTYNTTSAVTVK(*)SAIR(*) K18   | 44.52 | 1000   | 1.0891089 | -        | 1.306122    | 1.1976157 |
| Rpl37a | P61514 | 80  | NTTSAVTVK(*)SAIR(*) K9             | 30.68 | 1000   | 0.9405940 | 0.975903 | 0.755102    | 0.8905332 |
| Rpl37a | P61514 | 13  | VGIVGK(*)YGTR(*) K6                | 7.62  | 1000   | -         | -        | 1.602040816 |           |
| Copz1  | P61924 | 46  | AFEK(*)NIFNK(*) K4                 | 62.45 | 142.99 | 0.7472527 | 1.527777 | 1.2         | 1.1583435 |
| Copz1  | P61924 | 51  | NIFNK(*)THR(*) K5                  | 54.97 | 1000   | 0.7912087 | 0.861111 | 1.047058    | 0.8997929 |
| Sumo2  | P61957 | 42  | HTPLSK(*)LMK(*) K6                 | 74.11 | 57.45  | 0.7291666 | -        | 0.739130    | 0.7341486 |
| Sumo2  | P61957 | 11  | EGVK(*)TENNDHINLK(*) K4            | 59.8  | 228.69 | 1.03125   | 0.913580 | 1           | 0.9816101 |
| Ufm1   | P61961 | 69  | VPAATSAITNDGIGINPAQTAGNVFL K28     | 28.56 | 1000   | -         | -        | 0.755813953 |           |
| Dcaf7  | P61963 | 167 | VNLVSGHVK(*)TQLIAHDK(*) K9         | 42.54 | 71.07  | 0.9809523 | 0.347826 | -           | 0.6643892 |
| Wdr5   | P61965 | 112 | TLK(*)IWDVSSGK(*) K3               | 53.83 | 86.34  | 1.1756756 | 0.848837 | 1.838235    | 1.2875827 |
| Hnrnpk | P61979 | 198 | VVLIGGK(*)PDR(*) K7                | 96.89 | 1000   | 0.84375   | 0.842105 | 1.022222    | 0.9026925 |
| Hnrnpk | P61979 | 405 | DLAGSIIGK(*)GGQR(*) K9             | 94.98 | 1000   | 0.9270833 | 0.986842 | 0.966666    | 0.9601974 |
| Hnrnpk | P61979 | 52  | ILLQSK(*)NAGAVIGK(*) K6            | 94.36 | 193.63 | 0.9166666 | 0.934210 | 1.466666    | 1.105848  |
| Hnrnpk | P61979 | 139 | YK(*)GSDFDC(+57.02)ELR(*) K2       | 53.02 | 1000   | 1.125     | 1.026315 | 1.033333    | 1.0615497 |
| Hnrnpk | P61979 | 422 | HESGASIK(*)IDEPLEGSEDR(*) K8       | 47.09 | 1000   | -         | -        | 0.8         |           |
| Ywhag  | P61982 | 120 | NC(+57.02)SETQYESK(*)VIFYLK(*) K10 | 88.06 | 119.54 | 1.0495049 | 0.698795 | 1.031578    | 0.9266264 |
| Ywhag  | P61982 | 69  | VISSIEQK(*)TSADGNEK(*) K8          | 37.7  | 123.53 | 1.1980198 | 0.734939 | 1.147368    | 1.026776  |
| Rps7   | P62082 | 90  | FSGK(*)HVVFIAQR(*) K4              | 90    | 1000   | 1.0102040 | 0.962962 | 0.936170    | 0.9697791 |
| Rps7   | P62082 | 169 | AQQNNVEHK(*)VETFSGVYK(*) K9        | 89.4  | 140.79 | 1.0102040 | 1.049382 | 0.968085    | 1.009224  |
| Rps7   | P62082 | 160 | VHLDK(*)AQQNNVEHK(*) K5            | 76.4  | 225.26 | 1.2142857 | 1.160493 | 1.010638    | 1.1284726 |
| Rps7   | P62082 | 90  | K(*)FSGK(*)HVVFIAQR(*) K5          | 54.31 | 49.79  | 1.0102040 | 1.074074 | 0.968085    | 1.0174544 |
| Rps7   | P62082 | 155 | LIK(*)VHLDK(*) K3                  | 48.77 | 115.97 | -         | 0.975308 | 1.010638    | 0.9929735 |
| Rps7   | P62082 | 169 | NVEHK(*)VETFSGVYK(*) K5            | 38.48 | 59.43  | -         | 0.913580 | 1.212765    | 1.0631731 |
| Ppp1cb | P62141 | 25  | PGK(*)IVQMTEAEVR(*) K3             | 58.49 | 1000   | 0.8235294 | 0.766233 | 0.986111    | 0.8586248 |
| Ppp1cb | P62141 | 259 | AHQVVEDGYEFFAK(*)R(*) K14          | 54.62 | 1000   | 0.9117647 | -        | 1.236111    | 1.0739379 |
| Ppp1cb | P62141 | 40  | GLC(+57.02)IK(*)SR(*) K5           | 40.49 | 1000   | 1.1911764 | -        | -           |           |
| Ppp1cb | P62141 | 25  | GC(+57.02)R(*)PGK(*)IVQMTEAEVR K6  | 37.56 | 1000   | -         | 0.831168 | 2.25        | 1.5405844 |
| Psmc1  | P62192 | 423 | SK(*)ENVLYK(*) K2                  | 68.82 | 132.53 | 1.0107526 | 1.089743 | 0.869565    | 0.9900205 |
| Psmc1  | P62192 | 69  | IK(*)DYLLMEEEFIR(*) K2             | 8.62  | 1000   | -         | -        | 1.195652174 |           |
| Psmc5  | P62196 | 330 | LDILK(*)IHSR(*) K5                 | 80.9  | 1000   | 1.2947368 | 0.936708 | 1.054945    | 1.0954636 |
| Psmc5  | P62196 | 170 | EVIELPVK(*)HPELFELGIAQPK(*) K8     | 75.43 | 140.25 | 0.8631578 | -        | 0.912087    | 0.8876229 |

|        |        |     |                                  |     |       |        |           |          |          |           |
|--------|--------|-----|----------------------------------|-----|-------|--------|-----------|----------|----------|-----------|
| Psmc5  | P62196 | 397 | DSEK(*)NMSIK(*)                  | K4  | 55.14 | 70.86  | 0.6842105 | 0.822784 | 1        | 0.8356651 |
| Psmc5  | P62196 | 196 | GVLLYGPPGTGK(*)TLLAR(*)          | K12 | 51.6  | 1000   | 0.8105263 | 0.708860 | 0.890109 | 0.8031657 |
| Psmc5  | P62196 | 94  | VHPEGK(*)FVVDVDK(*)              | K6  | 25.92 | 85.08  | 1.2105263 | -        | 0.989010 | 1.0997687 |
| Rps8   | P62242 | 37  | PAANTK(*)IGPR(*)                 | K6  | 72.17 | 1000   | -         | -        | 0.901098 | 0.901     |
| Rps8   | P62242 | 98  | TLVK(*)NC(+57.02)IVLIDSTPYR(*)   | K4  | 66.38 | 1000   | 0.9381443 | 0.8625   | 0.989010 | 0.9298851 |
| Rps15a | P62245 | 43  | MK(*)HGYIGEFEIIDDHR(*)           | K2  | 83.65 | 1000   | 0.8958333 | 0.865853 | 1.054945 | 0.9388773 |
| Rps15a | P62245 | 60  | AGK(*)IVVNLTGR(*)                | K3  | 52.39 | 1000   | 0.3854166 | -        | 0.923076 | 0.6542468 |
| Rps15a | P62245 | 43  | MMK(*)HGYIGEFEIIDDHR(*)          | K3  | 42.57 | 1000   | 0.8020833 | -        | 0.989010 | 0.8955472 |
| Ube2h  | P62257 | 52  | FYGPQGTPEYGGVWK(*)VR(*)          | K15 | 48.46 | 1000   | -         | -        | 0.700854 | 0.701     |
| Ube2h  | P62257 | 22  | LIESK(*)HEVTILGGLNEFVVK(*)       | K5  | 15.83 | 110.25 | -         | -        | 1.666666 | 0.667     |
| Ywhae  | P62259 | 125 | MK(*)GDYHR(*)                    | K2  | 95.54 | 1000   | 0.9795918 | -        | 1.032608 | 1.0061003 |
| Ywhae  | P62259 | 118 | HLIPAANTGESK(*)VFYYK(*)          | K12 | 95.11 | 105.53 | 0.8571428 | 0.827160 | 0.804347 | 0.8295504 |
| Ywhae  | P62259 | 106 | LIC(+57.02)C(+57.02)DILDVLDK(*)I | K12 | 72.75 | 69.26  | 1.0714285 | 0.728395 | 0.989130 | 0.9296514 |
| Ywhae  | P62259 | 50  | NLLSVAYK(*)NVIGAR(*)             | K8  | 68.92 | 1000   | 0.9183673 | 0.864197 | 0.989130 | 0.9238984 |
| Ywhae  | P62259 | 118 | TGESK(*)VFYYK(*)                 | K5  | 24.29 | 127.18 | -         | 1.604938 | 1.119565 | 1.3622517 |
| Rps14  | P62264 | 63  | VK(*)ADR(*)DESSPYAAMLAAQDVAC     | K2  | 45.25 | 1000   | 0.5       | 1.654761 | 0.597826 | 0.9175293 |
| Rps14  | P62264 | 106 | TK(*)TPGPGAQSALR(*)              | K2  | 28.93 | 1000   | -         | -        | 0.880434 | 0.783     |
| Rps14  | P62264 | 86  | C(+57.02)K(*)ELGITALHIK(*)       | K2  | 12.34 | 123.42 | -         | -        | 1.086956 | 0.522     |
| Rps23  | P62267 | 48  | ANPFGGASHAK(*)GIVLEK(*)          | K11 | 81.07 | 113.99 | 0.8529411 | 0.944444 | 0.944444 | 0.9139434 |
| Rps23  | P62267 | 124 | VVK(*)VANVSLALYK(*)              | K3  | 63.88 | 207.07 | 0.8921568 | 0.819444 | 1        | 0.9038671 |
| Rps23  | P62267 | 76  | VQLIK(*)NGK(*)                   | K5  | 44.86 | 32.69  | 1.1274509 | 1.291666 | 1.266666 | 1.2285948 |
| Rps23  | P62267 | 25  | WHDK(*)QYK(*)                    | K4  | 25.53 | 30.72  | -         | 0.986111 | -        | -         |
| Rps18  | P62270 | 137 | GQHTK(*)TTGR(*)                  | K5  | 74.35 | 1000   | 0.9696969 | -        | 1.021739 | 0.9957181 |
| Rps18  | P62270 | 78  | QYK(*)IPDWFLNR(*)                | K3  | 66.75 | 1000   | 0.6969696 | 0.506024 | 0.880434 | 0.6944762 |
| Rps11  | P62281 | 45  | NIGLGFK(*)TPK(*)                 | K7  | 97.27 | 41.2   | 0.8653846 | 0.913580 | 0.924731 | 0.901232  |
| Rps11  | P62281 | 107 | HK(*)NMSVHLSPC(+57.02)FR(*)      | K2  | 86.21 | 1000   | 0.8653846 | 0.814814 | 0.935483 | 0.8718944 |
| Rps11  | P62281 | 38  | YYK(*)NIGLGFK(*)                 | K3  | 78.87 | 184.45 | 0.8942307 | 1        | 0.860215 | 0.9181486 |
| Rps11  | P62281 | 144 | FNVLK(*)VTK(*)                   | K5  | 35.92 | 48.45  | 1.2211538 | -        | -        | -         |
| Rps11  | P62281 | 136 | DVQIGDIVTVGEC(+57.02)R(*)PLSK(   | K18 | 8.51  | 1000   | 1.4615384 | -        | -        | -         |
| Rps11  | P62281 | 38  | YYK(*)NIGLGFK(*)TPK(*)           | K3  | 5.19  | 72.22  | -         | 0.987654 | -        | -         |
| Rps13  | P62301 | 9   | MHAPGK(*)GLSQSALPYR(*)           | K6  | 95.73 | 1000   | 1.0638297 | 0.875    | 0.892473 | 0.9437676 |
| Rps13  | P62301 | 70  | FVTGNK(*)ILR(*)                  | K6  | 53.94 | 1000   | 0.5212765 | -        | 0.838709 | 0.6799931 |
| Rps13  | P62301 | 78  | SK(*)GLAPDLPEDLYHLIK(*)          | K2  | 53.42 | 179.51 | 1.0744680 | 0.75     | 0.870967 | 0.8984786 |
| Rps13  | P62301 | 34  | LTSDDVK(*)EQIYK(*)               | K7  | 19.09 | 115.97 | 0.8297872 | -        | 1.182795 | 1.0062915 |

|        |        |     |                                 |     |       |        |           |          |             |           |
|--------|--------|-----|---------------------------------|-----|-------|--------|-----------|----------|-------------|-----------|
| Snrpg  | P62309 | 3   | S(+42.01)K(*)AHPPELK(*)         | K2  | 53.74 | 95.63  | 0.7663551 | 0.488372 | -           | 0.6273636 |
| Snrpd2 | P62317 | 79  | EMWTEVPK(*)SGK(*)               | K8  | 63.53 | 22.34  | 1         | 0.736842 | 0.966292    | 0.9010447 |
| Snrpd2 | P62317 | 98  | YISK(*)MFLR(*)                  | K4  | 5.68  | 1000   | -         | -        | 0.988764045 |           |
| Lsm5   | P62322 | 31  | IHIVMK(*)SDK(*)                 | K6  | 79.97 | 53.53  | 1.0113636 | 0.824324 | 0.930232    | 0.9219735 |
| Arf6   | P62331 | 7   | VLSK(*)IFGNK(*)                 | K4  | 52.71 | 81.69  | 0.7222222 | 0.917808 | 1           | 0.8800101 |
| Psmc6  | P62334 | 180 | GC(+57.02)LLYGPPGTGK(*)TLLAR(*) | K12 | 77.9  | 1000   | 0.7978723 | 0.730769 | 0.988888    | 0.8391768 |
| Psmc6  | P62334 | 322 | IHAGPITK(*)HGEIDYEAIVK(*)       | K8  | 63.42 | 176.98 | 1         | 0.820512 | 0.977777    | 0.9327635 |
| Psmc6  | P62334 | 314 | LDILK(*)IHAGPITK(*)             | K5  | 43.24 | 175.25 | 0.9042553 | 0.730769 | 0.9         | 0.8450082 |
| Rps4x  | P62702 | 16  | VAAPK(*)HWMLDK(*)               | K5  | 96.14 | 143.14 | 0.8775510 | 0.777777 | 0.870967    | 0.8420988 |
| Rps4x  | P62702 | 134 | IFVGTK(*)GIPHLVTHDAR(*)         | K6  | 90.92 | 1000   | 0.9183673 | 0.901234 | 0.956989    | 0.9255304 |
| Rps4x  | P62702 | 106 | LIYDTK(*)GR(*)                  | K6  | 85.4  | 1000   | 0.8163265 | 0.777777 | -           | 0.7970522 |
| Rps4x  | P62702 | 94  | MDVISIDK(*)TGENFR(*)            | K8  | 53.07 | 1000   | 0.9693877 | -        | 0.688172    | 0.8287799 |
| Rps4x  | P62702 | 230 | LSNIFVIGK(*)GNK(*)PWISLPR(*)    | K9  | 51.33 | 49.37  | 0.7040816 | -        | 0.892473    | 0.7982774 |
| Rps4x  | P62702 | 22  | HWMLDK(*)LTGVFAPR(*)            | K6  | 47.07 | 1000   | -         | -        | 1.032258065 |           |
| Rps4x  | P62702 | 71  | FIK(*)IDGK(*)                   | K3  | 38.83 | 29.57  | 1.0102040 | 0.827160 | 1.043010    | 0.9601251 |
| Rpl18a | P62717 | 76  | VK(*)NFGIWLR(*)                 | K2  | 98.32 | 1000   | 0.7731958 | 0.768292 | 0.913978    | 0.818489  |
| Rpl18a | P62717 | 41  | IFAPNHVVAK(*)SR(*)              | K10 | 74.28 | 1000   | 0.7525773 | 0.743902 | 0.827956    | 0.7748122 |
| Rpl18a | P62717 | 11  | EYK(*)VVGR(*)                   | K3  | 58.88 | 1000   | 0.8247422 | 0.646341 | 0.677419    | 0.7161677 |
| Rpl18a | P62717 | 128 | AHSIQIMK(*)VEEIAAGK(*)          | K8  | 53.2  | 99.23  | 0.6907216 | 0.548780 | 0.774193    | 0.6712319 |
| Rpl18a | P62717 | 41  | APNHVVAK(*)SR(*)                | K8  | 51.7  | 1000   | 0.8144329 | 0.560975 | 0.838709    | 0.7380394 |
| Rpl18a | P62717 | 41  | FAPNHVVAK(*)SR(*)               | K9  | 43.13 | 1000   | 10.154639 | -        | 6.634408    | 8.3945239 |
| Acta2  | P62737 | 361 | WISK(*)QEYDEAGPSIVHR(*)         | K4  | 78.3  | 1000   | 0.8971962 | 0.879518 | 0.760416    | 0.8457103 |
| Acta2  | P62737 | 115 | VAPEEHPTLLTEAPLNPK(*)ANR(*)     | K18 | 66.75 | 1000   | 0.6822429 | 0.662650 | -           | 0.6724468 |
| Acta2  | P62737 | 361 | ISK(*)QEYDEAGPSIVHR(*)          | K3  | 59.11 | 1000   | 1.2990654 | 0.819277 | 0.833333    | 0.983892  |
| Ap2s1  | P62743 | 45  | DAK(*)HTNFVEFR(*)               | K3  | 73.93 | 1000   | 1.39      | -        | 0.87        | 1.13      |
| Ap2s1  | P62743 | 18  | LAK(*)WYMQFDDDEK(*)             | K3  | 6.75  | 137.5  | -         | -        | 1.09        |           |
| Rpl23a | P62751 | 70  | NK(*)LDHYAIK(*)                 | K2  | 71.19 | 216.51 | 1.02      | 1.101265 | 1.047058    | 1.0561082 |
| Rpl23a | P62751 | 106 | ANK(*)HQIK(*)                   | K3  | 64.15 | 87.62  | 1.02      | 0.987341 | 1.047058    | 1.0181335 |
| Rpl23a | P62751 | 70  | R(*)NK(*)LDHYAIK(*)             | K3  | 50.02 | 150.63 | 1.05      | 1.012658 | 1.235294    | 1.0993174 |
| Rps6   | P62754 | 149 | LFNLSK(*)EDDVR(*)               | K6  | 81.27 | 1000   | 1         | 0.948717 | 1.063157    | 1.0039586 |
| Rps6   | P62754 | 203 | NK(*)EEAAEYAK(*)                | K2  | 77.95 | 142.27 | 0.9       | 1.025641 | 0.852631    | 0.9260909 |
| Rps6   | P62754 | 79  | LLLSK(*)GHSC(+57.02)YR(*)       | K5  | 68.36 | 1000   | 1         | 0.833333 | 0.905263    | 0.9128655 |
| Rps6   | P62754 | 79  | LLLSK(*)GHSC(+57.02)YR(*)PR(*)  | K5  | 61.86 | 1000   | 0.89      | 0.884615 | 0.936842    | 0.9038192 |
| Rps6   | P62754 | 2   | MK(*)LNISFPATGC(+57.02)QK(*)    | K2  | 30.92 | 126.79 | -         | 1.012820 | 1.010526    | 1.0116734 |

|          |        |     |                                      |       |        |           |          |          |           |
|----------|--------|-----|--------------------------------------|-------|--------|-----------|----------|----------|-----------|
| Mtpn     | P62774 | 66  | GADINAPDK(*)HHITPLLSAVYEGHVS K9      | 76.54 | 126.1  | 1.0294117 | 0.948051 | 0.808988 | 0.9288175 |
| Mtpn     | P62774 | 90  | LLLSK(*)GADK(*) K5                   | 52.98 | 25.11  | 0.8725490 | 0.571428 | 1.089887 | 0.8446217 |
| Mtpn     | P62774 | 11  | EFMWALK(*)NGDLDEVK(*) K7             | 48.37 | 86.34  | -         | 1.714285 | 1        | 1.3571429 |
| Mtpn     | P62774 | 24  | DYVAK(*)GEDVNR(*) K5                 | 25.05 | 1000   | 1.0980392 | 1.350649 | 1        | 1.1495629 |
| H4f16    | P62806 | 17  | G(+42.01)LGK(*)GGAK(*)R(*) K8        | 99.79 | 32.48  | 0.79      | 0.917647 | 0.978723 | 0.8954568 |
| H4f16    | P62806 | 9   | GK(*)GGK(*)GLGK(*) K5                | 99.77 | 97.69  | 0.93      | 0.858823 | 0.829787 | 0.8728703 |
| H4f16    | P62806 | 6   | GK(*)GGK(*)GLGK(*) K2                | 99.77 | 186.64 | 0.93      | 0.858823 | 0.829787 | 0.8728703 |
| H4f16    | P62806 | 13  | G(+42.01)K(*)GGK(*)GLGK(*)GGAK K9    | 98.79 | 48.83  | 0.01      | -        | -        |           |
| H4f16    | P62806 | 9   | G(+42.01)K(*)GGK(*)GLGK(*)GGAK K5    | 98.79 | 65.81  | 0.01      | -        | -        |           |
| H4f16    | P62806 | 17  | LGK(*)GGAK(*)R(*) K7                 | 97.64 | 1000   | -         | 1.164705 | 0.925531 | 1.0451189 |
| H4f16    | P62806 | 13  | LGK(*)GGAK(*)R(*) K3                 | 97.64 | 1000   | -         | 1.164705 | 0.925531 | 1.0451189 |
| H4f16    | P62806 | 13  | G(+42.01)GK(*)GLGK(*)GGAK(*) K7      | 95.14 | 31.27  | 0.78      | -        | -        |           |
| H4f16    | P62806 | 9   | GGK(*)GLGK(*) K3                     | 84.23 | 97.69  | 1.24      | 1.141176 | 1.191489 | 1.1908886 |
| H4f16    | P62806 | 13  | GK(*)GLGK(*)GGAK(*) K6               | 79.3  | 55.21  | 0.88      | 0.929411 | 0.872340 | 0.8939174 |
| H4f16    | P62806 | 9   | GK(*)GLGK(*)GGAK(*) K2               | 79.3  | 150.89 | 0.88      | 0.929411 | 0.872340 | 0.8939174 |
| H4f16    | P62806 | 9   | S(+42.01)GR(*)GK(*)GGK(*)GLGK(*) K8  | 74.18 | 67.69  | -         | 0.929411 | -        |           |
| H4f16    | P62806 | 6   | S(+42.01)GR(*)GK(*)GGK(*)GLGK(*) K5  | 74.18 | 83.89  | -         | 0.929411 | -        |           |
| H4f16    | P62806 | 17  | G(+42.01)GK(*)GLGK(*)GGAK(*)R(*) K11 | 70.54 | 139.85 | 0.75      | 43.88235 | 0.702127 | 15.111494 |
| H4f16    | P62806 | 13  | G(+42.01)GK(*)GLGK(*)GGAK(*)R(*) K7  | 70.54 | 105.6  | 0.75      | 43.88235 | 0.702127 | 15.111494 |
| H4f16    | P62806 | 9   | GGK(*)GLGK(*)GGAK(*)R(*) K3          | 67.35 | 1000   | 0.87      | 0.847058 | 1.031914 | 0.9163246 |
| H4f16    | P62806 | 17  | GK(*)GLGK(*)GGAK(*)R(*) K10          | 62.54 | 1000   | 0.88      | 0.882352 | 0.861702 | 0.874685  |
| H4f16    | P62806 | 13  | GK(*)GLGK(*)GGAK(*)R(*) K6           | 62.54 | 1000   | 0.88      | 0.882352 | 0.861702 | 0.874685  |
| H4f16    | P62806 | 9   | GK(*)GLGK(*)GGAK(*)R(*) K2           | 62.54 | 1000   | 0.88      | 0.882352 | 0.861702 | 0.874685  |
| H4f16    | P62806 | 9   | GGK(*)GLGK(*)GGAK(*) K3              | 60.31 | 166.01 | 0.77      | 0.811764 | 0.829787 | 0.8038506 |
| H4f16    | P62806 | 13  | GLGK(*)GGAK(*)R(*) K4                | 60.14 | 1000   | 0.8       | 0.929411 | 1.010638 | 0.91335   |
| H4f16    | P62806 | 80  | R(*)K(*)TVTAMDVVYALK(*) K2           | 58.68 | 204.37 | 0.93      | 0.847058 | 1.106382 | 0.9611473 |
| H4f16    | P62806 | 32  | DNIQGITK(*)PAIR(*) K8                | 52.43 | 1000   | 0.75      | 0.788235 | 0.776595 | 0.7716103 |
| H4f16    | P62806 | 6   | GK(*)GGK(*)GLGK(*)GGAK(*) K2         | 49.07 | 254.8  | 0.26      | 0.694117 | 0.446808 | 0.4669754 |
| H4f16    | P62806 | 78  | DAVTYTEHAK(*)R(*) K10                | 47.08 | 1000   | 1.07      | 1.047058 | 1.276595 | 1.1312182 |
| H4f16    | P62806 | 92  | TVTAMDVVYALK(*)R(*) K12              | 40.47 | 1000   | 1.12      | 1.494117 | 0.861702 | 1.1586066 |
| Atp6v1b2 | P62814 | 460 | FEK(*)NFITQGPYENR(*) K3              | 73.29 | 1000   | -         | 0.876712 | 0.943181 | 0.9099471 |
| Atp6v1b2 | P62814 | 403 | LMK(*)SAIGEGMTR(*) K3                | 73.19 | 1000   | 0.6571428 | 0.808219 | 0.727272 | 0.7308783 |
| Rab1A    | P62821 | 187 | MGPATAGGAEK(*)SNVK(*) K12            | 54.18 | 48.83  | 0.84375   | 0.525641 | 0.903225 | 0.7575389 |
| Rab1A    | P62821 | 61  | IK(*)LQIWDTAGQER(*) K2               | 48.82 | 1000   | 1.0104166 | 0.807692 | 1.043010 | 0.9537066 |



|       |        |     |                                  |     |       |        |           |          |                     |
|-------|--------|-----|----------------------------------|-----|-------|--------|-----------|----------|---------------------|
| Rab1A | P62821 | 24  | LLIGDSGVGK(*)SC(+57.02)LLLR(*)   | K11 | 39    | 1000   | -         | -        | 0.935483871         |
| Ran   | P62827 | 134 | AK(*)SIVFHR(*)                   | K2  | 97.67 | 1000   | 0.9354838 | 1.074074 | 0.9890100.0.999523  |
| Ran   | P62827 | 99  | VTYK(*)NVPNWHR(*)                | K4  | 83.67 | 1000   | 0.8602150 | 0.864197 | 0.9120870.8788335   |
| Ran   | P62827 | 23  | LVLVGDDGGTGK(*)TTFVK(*)          | K11 | 78.09 | 107.29 | 0.8924731 | 0.827160 | 0.7912080.8369475   |
| Ran   | P62827 | 123 | VC(+57.02)ENIPIVLC(+57.02)GNK(*) | K13 | 72.78 | 67.69  | 1         | 0.814814 | 0.9890100.0.9346086 |
| Rpl23 | P62830 | 113 | GEMK(*)GSAITGPVAK(*)             | K4  | 9.84  | 58.64  | -         | 0.881578 | 1.1075260.9945529   |
| Rps15 | P62843 | 77  | EAPPM(+15.99)EK(*)PEVVK(*)THLR   | K12 | 83.46 | 94.22  | -         | 0.825    | 0.8850570.8550287   |
| Rps15 | P62843 | 77  | K(*)EAPPMK(*)PEVVK(*)THLR(*)     | K13 | 44.77 | 98.37  | 0.6770833 | 0.95     | 0.8160910.8143918   |
| Rps24 | P62849 | 68  | THFGGGK(*)TTGFGMIYDSL DYAK(*)    | K7  | 90.34 | 298.8  | 0.9708737 | -        | 0.8924730.9316735   |
| Rps24 | P62849 | 37  | ATVPK(*)TEIR(*)                  | K5  | 69.86 | 1000   | 0.9029126 | 1.051948 | 1.0645161.0064589   |
| Rps24 | P62849 | 32  | QMVIDVLHPGK(*)ATVPK(*)           | K11 | 62.94 | 22.36  | 1.2427184 | 0.935064 | 0.9032250.10270031  |
| Rps24 | P62849 | 37  | VPK(*)TEIR(*)                    | K3  | 10.33 | 1000   | -         | 0.870129 | -                   |
| Rps25 | P62852 | 52  | LNNLVLFDK(*)ATYDK(*)             | K9  | 93.29 | 107.29 | 0.9892473 | 0.846153 | 1.0112350.948879    |
| Rps25 | P62852 | 94  | AALQELLSK(*)GLIK(*)              | K9  | 83.38 | 82.24  | 0.9462365 | 1.051282 | 0.8988760.965465    |
| Rps25 | P62852 | 52  | DK(*)LNNLVLFDK(*)ATYDK(*)        | K11 | 65.29 | 32.16  | 0.8494623 | 0.589743 | 1.0674150.8355406   |
| Rps25 | P62852 | 57  | ATYDK(*)LC(+57.02)K(*)           | K5  | 26.07 | 49.37  | -         | 7.217948 | 6.0786516.6483002   |
| Rps26 | P62855 | 82  | LHYC(+57.02)VSC(+57.02)AIHSK(*)  | K12 | 96.27 | 1000   | 1.1313131 | 1.228571 | 1.0561791.1386881   |
| Rps28 | P62858 | 16  | VTK(*)VLGR(*)                    | K3  | 92.23 | 1000   | -         | -        | 0.858585859         |
| Elob  | P62869 | 11  | HK(*)TTIFTDK(*)                  | K2  | 98.04 | 211.64 | 0.8969072 | 0.907894 | 0.9677410.9241813   |
| Elob  | P62869 | 11  | R(*)HK(*)TTIFTDK(*)              | K3  | 15.3  | 154.74 | 1.1546391 | -        | -                   |
| Gnb1  | P62874 | 57  | GHLAK(*)IYAMHWGTDSR(*)           | K5  | 88.12 | 1000   | 0.9270833 | -        | 10.9635417          |
| Gnb1  | P62874 | 15  | QEAEQLK(*)NQIR(*)                | K7  | 76.62 | 1000   | 0.7083333 | -        | 0.6526310.6804825   |
| Gnb1  | P62874 | 89  | LIWDSYTTNK(*)VHAIPLR(*)          | K11 | 76.07 | 1000   | 1.0416666 | 0.755319 | 1.1578940.9849602   |
| Rpl30 | P62889 | 32  | YVLGYK(*)QTLK(*)                 | K6  | 92.96 | 58.99  | 0.8476190 | 0.8      | 0.8659790.8378661   |
| Rpl30 | P62889 | 68  | LAK(*)TGVHHYSGNNIELGTAC(+57.02)  | K3  | 78    | 132.17 | 0.9333333 | 0.8      | 0.8865970.8733104   |
| Rpl30 | P62889 | 87  | TGVHHYSGNNIELGTAC(+57.02)GK(*)   | K19 | 72.3  | 1000   | 1.0476190 | 1.022222 | 1.0206181.0301533   |
| Rpl30 | P62889 | 68  | K(*)SEIEYYAMLAK(*)TGVHHYSGNNI    | K12 | 16.29 | 41.98  | 1.5619047 | -        | -                   |
| Rpl30 | P62889 | 26  | SGK(*)YVLGYK(*)                  | K3  | 14.95 | 102.87 | -         | -        | 0.463917526         |
| Rpl30 | P62889 | 87  | SGNNIELGTAC(+57.02)GK(*)YYR(*)   | K13 | 11.85 | 1000   | -         | -        | 1.103092784         |
| Cycs  | P62897 | 28  | HK(*)TGPNLHGLFGR(*)              | K2  | 67.22 | 1000   | 4.4090909 | 2.342857 | 0.547619(2.433189   |
| Rpl31 | P62900 | 70  | LNK(*)AVWAK(*)                   | K3  | 89.3  | 111.23 | 0.86      | 0.850574 | 0.9387750.8831167   |
| Rpl31 | P62900 | 75  | AVWAK(*)GIR(*)                   | K5  | 88.52 | 1000   | 0.9       | 0.839080 | 0.9591830.8994214   |
| Rps3  | P62908 | 187 | VK(*)IMLPWDPSGK(*)               | K2  | 80.3  | 148.37 | 0.7578947 | 0.716049 | 0.8695650.7811698   |
| Rps3  | P62908 | 132 | FIMESGAK(*)GC(+57.02)EVVSGK(*)   | K8  | 78.95 | 140.39 | 0.8       | 0.716049 | 1.0543470.8567991   |

|          |        |     |                                    |     |       |        |           |          |             |           |
|----------|--------|-----|------------------------------------|-----|-------|--------|-----------|----------|-------------|-----------|
| Rps3     | P62908 | 108 | YK(*)LLGGLAVR(*)                   | K2  | 36.93 | 1000   | 0.6526315 | 1.160493 | 1.043478    | 0.9522012 |
| Rps3     | P62908 | 62  | TQNVLGEK(*)GR(*)                   | K8  | 28.91 | 1000   | 1.4105263 | 0.654320 | 1.771739    | 1.2788621 |
| Rpl32    | P62911 | 67  | TK(*)HMLPSGFR(*)                   | K2  | 79.57 | 1000   | 0.8260869 | 0.883116 | 1.054347    | 0.9211839 |
| Rpl32    | P62911 | 106 | SYC(+57.02)AEIAHNVSSK(*)NR(*)      | K13 | 76.88 | 1000   | 0.9673913 | 0.974025 | 1.021739    | 0.9877188 |
| Rpl32    | P62911 | 93  | ELEVLLMC(+57.02)NK(*)SYC(+57.02)   | K10 | 65.84 | 29.28  | 0.7717391 | -        | 0.945652    | 0.8586957 |
| Rpl8     | P62918 | 60  | GAPLAK(*)VVFR(*)                   | K6  | 46.23 | 1000   | 1.0925925 | 0.548780 | 0.882978    | 0.8414506 |
| Ybx1     | P62960 | 56  | VIATK(*)VLGTVK(*)                  | K5  | 78.37 | 123.86 | 0.8817204 | 1.405063 | 1.146067    | 1.1442837 |
| Ybx1     | P62960 | 79  | NDTK(*)EDVVFVHQTAK(*)              | K4  | 74.72 | 176.98 | 0.9032258 | 1.063291 | 0.955056    | 0.9738577 |
| Pfn1     | P62962 | 116 | TLVLLMGK(*)EGVHGGLINK(*)           | K8  | 56.94 | 44.69  | 0.8989898 | 0.617283 | 1           | 0.838758  |
| Pfn1     | P62962 | 91  | TK(*)STGGAPTFTNVVTMTAK(*)          | K2  | 36.7  | 213.24 | -         | -        | 0.724137931 |           |
| Rps27a   | P62983 | 6   | MQIFVK(*)TLTGK(*)                  | K6  | 99.83 | 87.95  | 1.0120481 | 0.811764 | 0.882978    | 0.9022639 |
| Rps27a   | P62983 | 6   | VK(*)TLTGK(*)                      | K2  | 97.19 | 105.53 | 1.2168674 | 0.929411 | 0.946808    | 1.0310292 |
| Rps27a   | P62983 | 6   | QIFVK(*)TLTGK(*)                   | K5  | 79.68 | 82.34  | -         | -        | 0.808510638 |           |
| Rps27a   | P62983 | 143 | HYC(+57.02)GK(*)C(+57.02)C(+57.02) | K5  | 78.7  | 161.68 | 1.1566265 | 1.035294 | 1.468085    | 1.2200019 |
| Rps27a   | P62983 | 6   | IFVK(*)TLTGK(*)                    | K4  | 70.11 | 40.91  | -         | -        | 0.872340426 |           |
| Rps27a   | P62983 | 11  | TLTGK(*)TITLEVEPSDTIENVK(*)        | K5  | 42.06 | 161.67 | 0.7469879 | -        | 1.255319    | 1.0011536 |
| Rps27a   | P62983 | 48  | LIFAGK(*)QLEDGR(*)                 | K6  | 31.14 | 1000   | -         | 0.835294 | -           |           |
| Rac1     | P63001 | 166 | GLK(*)TVFDEAIR(*)                  | K3  | 85.54 | 1000   | 0.8762886 | 0.822784 | 1.058139    | 0.919071  |
| Rac1     | P63001 | 116 | HHC(+57.02)PNTPIILVGTK(*)LDLR(*)   | K14 | 52.79 | 1000   | 0.9690721 | -        | 1.011627    | 0.99035   |
| Pafah1b1 | P63005 | 228 | MWEVQTGYC(+57.02)VK(*)TFTGHR       | K11 | 58.53 | 1000   | 0.5824175 | -        | 1.130434    | 0.8564262 |
| Pafah1b1 | P63005 | 360 | FILSC(+57.02)ADDK(*)TLR(*)         | K9  | 51.81 | 1000   | 0.8021978 | -        | -           |           |
| Hspa8    | P63017 | 507 | ITITNDK(*)GR(*)                    | K7  | 92.54 | 1000   | 1.0309278 | 1.025974 | 0.901098    | 0.9860003 |
| Hspa8    | P63017 | 102 | PK(*)VQVEYK(*)                     | K2  | 91.85 | 156.85 | 0.8350515 | 0.844155 | 0.890109    | 0.8564391 |
| Hspa8    | P63017 | 539 | VSSK(*)NSLESYAFNMK(*)              | K4  | 90.97 | 281.19 | 0.8969072 | 0.883116 | 0.934065    | 0.9046967 |
| Hspa8    | P63017 | 328 | LDK(*)SQIHDIVLVGSTR(*)             | K3  | 88.97 | 1000   | 0.9690721 | 0.948051 | 0.890109    | 0.9357447 |
| Hspa8    | P63017 | 128 | MK(*)EIAEAYLGK(*)                  | K2  | 87.83 | 250.15 | 0.8041237 | 0.792207 | 0.923076    | 0.8398028 |
| Hspa8    | P63017 | 500 | ENK(*)ITITNDK(*)                   | K3  | 76.8  | 128.65 | 0.8247422 | 0.766233 | 0.791208    | 0.7940616 |
| Hspa8    | P63017 | 112 | GETK(*)SFYPEEVSSMVLTK(*)           | K4  | 70.2  | 214.3  | 1.1030927 | 0.987012 | 0.967032    | 1.0190462 |
| Hspa8    | P63017 | 56  | LIGDAK(*)NQVAMNPTNTVFDK(*)         | K7  | 65.39 | 170.25 | 0.9381443 | 0.922077 | 1.241758    | 1.0339935 |
| Hspa8    | P63017 | 88  | R(*)FDDAVVQSDMK(*)HWPFMVVN         | K12 | 59.58 | 1000   | 1.9072164 | -        | 1.010989    | 1.4591028 |
| Hspa8    | P63017 | 88  | FDDAVVQSDMK(*)HWPFMVVNDAC          | K11 | 59.37 | 1000   | -         | -        | 0.967032967 |           |
| Hspa8    | P63017 | 512 | LSK(*)EDIER(*)                     | K3  | 51.79 | 1000   | 0.9381443 | 1.961038 | 1.153846    | 1.3510098 |
| Hspa8    | P63017 | 25  | GK(*)VEIANDQGNR(*)                 | K2  | 50.69 | 1000   | 0.8969072 | 0.987012 | 0.824175    | 0.9026987 |
| Hspa8    | P63017 | 573 | ILDK(*)C(+57.02)NEIISWLDK(*)       | K4  | 49.37 | 251.58 | 1.5051546 | -        | 1.175824    | 1.3404894 |

|        |        |     |                                  |     |       |        |           |          |                     |
|--------|--------|-----|----------------------------------|-----|-------|--------|-----------|----------|---------------------|
| Hspa8  | P63017 | 88  | R(*)FDDAVVQSDMK(*)HWPFM(+15      | K12 | 40.27 | 37.72  | -         | -        | 1.010989011         |
| Hspa8  | P63017 | 108 | VQVEYK(*)GETK(*)                 | K6  | 38    | 58.99  | 0.8659793 | 1.324675 | 1.1978021.1.1294856 |
| Hspa8  | P63017 | 246 | MVNHFAIEFK(*)R(*)                | K10 | 36.89 | 1000   | -         | -        | 0.813186813         |
| Hspa8  | P63017 | 451 | AMTK(*)DNLLGK(*)                 | K4  | 33.23 | 78.16  | 1.1340206 | 0.987012 | 1.2527471.1.1245936 |
| Hspa8  | P63017 | 357 | LLQDFNKG(*)ELNK(*)               | K9  | 13.02 | 24.67  | -         | -        | 1.296703297         |
| Hspa8  | P63017 | 25  | QHKG(*)VEIANDQGNR(*)             | K4  | 4.92  | 1000   | 0.8144329 | -        | -                   |
| Tpt1   | P63028 | 112 | VK(*)PFMTGAAEQJK(*)              | K2  | 72.39 | 236.99 | 0.7623762 | 0.7625   | 0.9450540.8233104   |
| Tpt1   | P63028 | 19  | DLISHDELFSDIYK(*)IR(*)           | K14 | 56.22 | 1000   | -         | -        | 0.648351648         |
| Tpt1   | P63028 | 97  | DYMK(*)SLK(*)                    | K4  | 11.21 | 22.45  | -         | 0.75     | -                   |
| Tpt1   | P63028 | 85  | HHLQETSFTK(*)EAYK(*)             | K10 | 8.26  | 38.03  | -         | -        | 1.32967033          |
| Dnaja1 | P63037 | 296 | TIVITSHPGQIVK(*)HGDIK(*)         | K13 | 97.63 | 65.44  | 0.8571428 | 0.764705 | 0.9090900.8436465   |
| Dnaja1 | P63037 | 130 | LALQK(*)NVIC(+57.02)DK(*)        | K5  | 87.09 | 143.14 | 0.7346938 | 0.705882 | 0.8484840.7630204   |
| Dnaja1 | P63037 | 130 | LALQK(*)NVIC(+57.02)DK(*)C(+57.0 | K5  | 57.83 | 94.27  | 0.7448979 | 0.623529 | 1.4242420.9308899   |
| Dnaja1 | P63037 | 46  | FK(*)QISQAYEVLADSK(*)            | K2  | 45.4  | 213.54 | -         | -        | 0.929292929         |
| Dnaja1 | P63037 | 130 | K(*)LALQK(*)NVIC(+57.02)DK(*)C(+ | K6  | 13.37 | 39.44  | 1.4489795 | 0.988235 | 1.0909090.1.1760413 |
| Hspd1  | P63038 | 91  | YK(*)NIGAK(*)                    | K2  | 92.4  | 115.97 | 1.0103092 | 0.975308 | 0.9340650.973228    |
| Hspd1  | P63038 | 523 | GIIDPTK(*)VVR(*)                 | K7  | 67.32 | 1000   | 0.8453608 | 0.765432 | 0.8791200.8299713   |
| Hspd1  | P63038 | 72  | TVIEQSWGSPK(*)VTK(*)             | K12 | 61.01 | 57.45  | -         | 0.543209 | 1.5164831.0298467   |
| Hspd1  | P63038 | 292 | LK(*)VGLQVVAVK(*)                | K2  | 53.28 | 195.94 | -         | -        | 1.010989011         |
| Hspd1  | P63038 | 82  | DGVTVAK(*)SIDLK(*)               | K7  | 23.67 | 70.86  | 0.3608247 | 0.555555 | 0.6153840.5105883   |
| Hspd1  | P63038 | 481 | IPAM(+15.99)TIK(*)NAGVEGSLIVE    | K8  | 9     | 167.97 | -         | -        | 1.230769231         |
| Eif4e  | P63073 | 162 | GDK(*)IAIWTTEC(+57.02)ENR(*)     | K3  | 67.62 | 1000   | 2.0645161 | 0.779220 | 0.8369560.1.2268978 |
| Eif4e  | P63073 | 36  | TESNQEVANPEHYIK(*)HPLQNR(*)      | K15 | 52.71 | 1000   | -         | 0.753246 | 1.2065210.9798842   |
| Eif4e  | P63073 | 54  | SK(*)TWQANLR(*)                  | K2  | 49.56 | 1000   | 0.8602150 | 0.831168 | 0.7717390.821041    |
| Eif4e  | P63073 | 206 | IVIGYQSHADTATK(*)SGSTTK(*)       | K14 | 39.85 | 22.09  | -         | 1.623376 | 0.5978260.1.1106014 |
| Mapk1  | P63085 | 268 | NYLLSLPHK(*)NK(*)                | K9  | 67.56 | 36.05  | 0.9358974 | 0.628571 | 0.960.8414896       |
| Mapk1  | P63085 | 201 | APEIMLNSK(*)GYTK(*)              | K9  | 24.79 | 48.12  | 1.1282051 | 1        | 1.1466660.1.0916239 |
| Gnas   | P63094 | 96  | VQDIK(*)NNLK(*)                  | K5  | 86.62 | 77.13  | 1         | 0.858974 | 0.9444440.9344729   |
| Gnas   | P63094 | 216 | FQVDK(*)VNFHMFVGGQR(*)           | K5  | 73.58 | 1000   | 0.8260869 | -        | 0.9111110.868599    |
| Gnas   | P63094 | 91  | ATK(*)VQDIK(*)                   | K3  | 25.12 | 127.18 | 0.4347826 | 0.846153 | 0.9222220.7343862   |
| Ywhaz  | P63101 | 115 | ASQPESK(*)VFYLK(*)               | K7  | 86.88 | 115.97 | 0.8556701 | 0.820512 | 1.0229880.8997238   |
| Ywhaz  | P63101 | 68  | VVSSIEQK(*)TEGAEK(*)             | K8  | 65.31 | 33.48  | -         | 0.538461 | -                   |
| Ywhaz  | P63101 | 3   | M(+42.01)DK(*)NELVQK(*)          | K3  | 52.14 | 132.53 | 0.8350515 | 0.628205 | 1.0114940.824917    |
| Nfyb   | P63139 | 69  | IMK(*)NAIPQTGK(*)                | K3  | 45.53 | 131.72 | -         | -        | -                   |

|        |        |     |                                  |     |       |        |           |          |             |           |
|--------|--------|-----|----------------------------------|-----|-------|--------|-----------|----------|-------------|-----------|
| Hmgb1  | P63158 | 114 | IK(*)GEHPGLSIGDVAK(*)            | K2  | 68.62 | 207.86 | 1.1505376 | 0.947368 | 1.321839    | 1.139915  |
| Dynll1 | P63168 | 9   | AVIK(*)NADMSEEMQQDSVEC(+57.02)K4 | K4  | 69.51 | 475.55 | -         | 0.802197 | 1.153846    | 0.978022  |
| Rps17  | P63276 | 49  | NK(*)IAGYVTHLM(+15.99)K(*)       | K2  | 76.27 | 250.23 | 0.9684210 | 1.08     | 1.055555    | 1.0346589 |
| Rps17  | P63276 | 19  | VII EK(*)YYTR(*)                 | K5  | 59    | 1000   | 0.9263157 | 0.933333 | 1.044444    | 0.9680312 |
| Rps12  | P63323 | 93  | LGEWVGLC(+57.02)K(*)IDR(*)       | K9  | 91.16 | 1000   | 0.9897959 | 0.765432 | 1.053763    | 0.9363305 |
| Rps12  | P63323 | 116 | DYGK(*)ESQAK(*)                  | K4  | 34.82 | 87.95  | 0.9081632 | 0.716049 | 0.849462    | 0.8245583 |
| Rps10  | P63325 | 31  | DVHMPK(*)HPELADK(*)              | K6  | 77.2  | 61.6   | 1.0666666 | 0.973333 | 0.957446    | 0.9991489 |
| Rps10  | P63325 | 31  | K(*)DVHMPK(*)HPELADK(*)          | K7  | 56.54 | 110.43 | 1.0111111 | 0.96     | 0.861702    | 0.9442711 |
| Ppp2ca | P63330 | 29  | QLSESQVK(*)SLC(+57.02)EK(*)      | K8  | 57.9  | 87.95  | 1.4105263 | 1.732394 | 0.954545    | 1.365822  |
| Csnk2b | P67871 | 147 | C(+57.02)MDVYTPK(*)SSR(*)        | K8  | 52.49 | 1000   | 1.0430107 | 0.986842 | 1           | 1.009951  |
| Rpl22  | P67984 | 69  | SK(*)ITVTSEVPFSK(*)              | K2  | 47.98 | 128.06 | 0.8709677 | -        | 0.885416    | 0.8781922 |
| Ube2l3 | P68037 | 138 | FC(+57.02)K(*)NAEEFTK(*)         | K3  | 85.57 | 163.4  | 0.8387096 | 0.8      | 1.060240    | 0.8996502 |
| Ube2l3 | P68037 | 82  | IYHPNIDEK(*)GQVC(+57.02)LPVISA   | K9  | 52.03 | 156.83 | 1.0967741 | -        | 0.963855    | 1.0303148 |
| Ube2l3 | P68037 | 82  | IYHPNIDEK(*)GQVC(+57.02)LPVISA   | K9  | 44.51 | 92.48  | -         | -        | 0.939759036 |           |
| Ube2l3 | P68037 | 20  | C(+57.02)GMK(*)NFR(*)            | K4  | 43.82 | 1000   | -         | -        | 1.518072289 |           |
| Rack1  | P68040 | 38  | DK(*)TIIMWK(*)                   | K2  | 93    | 139.02 | 0.9130434 | 0.7375   | 0.923076    | 0.8578735 |
| Rack1  | P68040 | 185 | LK(*)TNHIGHTGYLNTVTVSPDGSLC(-    | K2  | 82.73 | 322.5  | 1.0869565 | 0.9625   | 0.901098    | 0.9835185 |
| Rack1  | P68040 | 175 | LVK(*)VWNLANC(+57.02)K(*)        | K3  | 78.91 | 161.77 | 0.8804347 | 0.8375   | 0.923076    | 0.8803372 |
| Rack1  | P68040 | 172 | SSNPIIVSC(+57.02)GWDK(*)LVK(*)   | K13 | 75.25 | 44.84  | 0.9021739 | 0.825    | 0.934065    | 0.8870799 |
| Rack1  | P68040 | 139 | LWNTLGVC(+57.02)K(*)YTVQDESH     | K9  | 61.56 | 1000   | -         | -        | 1.164835165 |           |
| Rack1  | P68040 | 106 | FVGHTK(*)DVLSVAFSSDNR(*)         | K6  | 46.49 | 1000   | 1.9347826 | -        | 1.351648    | 1.6432155 |
| Rack1  | P68040 | 271 | IIVDELK(*)QEVISTSSK(*)           | K7  | 18.92 | 22.83  | 1.0760869 | -        | -           |           |
| Rack1  | P68040 | 106 | TK(*)DVLSVAFSSDNR(*)             | K2  | 3.47  | 1000   | -         | -        | 2.274725275 |           |
| Prkacb | P68181 | 24  | AK(*)EDFLR(*)                    | K2  | 64.57 | 1000   | 1.1142857 | -        | 1.301369    | 1.2078278 |
| Ywhaq  | P68254 | 49  | NLLSVAYK(*)NVVGGR(*)             | K8  | 83.83 | 1000   | 0.8333333 | 1.125    | 0.771739    | 0.9100242 |
| Ywhaq  | P68254 | 122 | MK(*)GDYFR(*)                    | K2  | 75.94 | 1000   | 0.8039215 | 0.7      | 0.826086    | 0.7766695 |
| Ywhaq  | P68254 | 3   | M(+42.01)EK(*)TELIQK(*)          | K3  | 68.92 | 121.92 | 0.7843137 | 0.7625   | 0.771739    | 0.772851  |
| Ywhaq  | P68254 | 68  | VISSIEQK(*)TDTSDK(*)K(*)         | K8  | 45.02 | 113.99 | 0.8431372 | -        | 1           | 0.9215686 |
| Ywhaq  | P68254 | 68  | VISSIEQK(*)TDTSDK(*)             | K8  | 39.11 | 121.92 | 0.6078431 | 0.9375   | 0.826086    | 0.7904767 |
| Tuba4a | P68368 | 60  | TIGGGDDSF TTFFC(+57.02)ETGAGK(   | K20 | 25.12 | 1000   | 0.0109890 | 0.012345 | 0.019801    | 0.0143789 |
| Tuba1a | P68369 | 401 | FDLMYAK(*)R(*)                   | K7  | 96.26 | 1000   | 0.82      | 0.841463 | 0.887755    | 0.8497395 |
| Tuba1a | P68369 | 394 | LDHK(*)FDLMYAK(*)                | K4  | 95.96 | 203.4  | 0.88      | 0.878048 | 0.897959    | 0.885336  |
| Tuba1a | P68369 | 311 | HGK(*)YMAC(+57.02)C(+57.02)LLY   | K3  | 81.81 | 1000   | 0.87      | 0.939024 | 0.969387    | 0.9261374 |
| Tuba1a | P68369 | 60  | TIGGGDDSFNTFFSETGAGK(*)HVPR(     | K20 | 75.05 | 1000   | 1.01      | 1.121951 | 0.959183    | 1.0303783 |

|         |        |      |                               |     |       |        |           |          |          |           |
|---------|--------|------|-------------------------------|-----|-------|--------|-----------|----------|----------|-----------|
| Tuba1a  | P68369 | 336  | DVNAAIATIK(*)TK(*)            | K10 | 68.62 | 33.18  | 0.81      | 0.780487 | 0.836734 | 0.8090742 |
| Tuba1a  | P68369 | 60   | FSETGAGK(*)HVPR(*)            | K8  | 62.94 | 1000   | 0.93      | 0.792682 | 0.836734 | 0.8531392 |
| Tuba1a  | P68369 | 96   | QLFHPEQLITGK(*)EDAANNYAR(*)   | K12 | 57.47 | 1000   | 0.87      | -        | 0.938775 | 0.9043878 |
| Tuba1a  | P68369 | 60   | TFFSETGAGK(*)HVPR(*)          | K10 | 34.49 | 1000   | -         | -        | 0.724489 | 0.796     |
| Tubb4b  | P68372 | 58   | INVYYNEATGGK(*)YVPR(*)        | K12 | 58.31 | 1000   | 1.1382978 | 0.372093 | 1.157303 | 0.8892314 |
| Tubb4b  | P68372 | 297  | MFDAK(*)NMMAAC(+57.02)DPR(*)  | K5  | 44.13 | 1000   | -         | -        | 1.314606 | 0.742     |
| Ywhah   | P68510 | 110  | FLIK(*)NC(+57.02)NDFQYESK(*)  | K4  | 86.76 | 229.18 | 0.9895833 | 0.896103 | 0.967391 | 0.9510262 |
| Ywhah   | P68510 | 127  | MK(*)GDYYR(*)                 | K2  | 86.24 | 1000   | 0.9479166 | 0.870129 | 0.989130 | 0.9357257 |
| Ywhah   | P68510 | 50   | NLLSVAYK(*)NVVGAR(*)          | K8  | 78.75 | 1000   | 0.8854166 | 0.948051 | 0.978260 | 0.9372432 |
| Sbds    | P70122 | 33   | R(*)FEIAC(+57.02)YK(*)NK(*)   | K8  | 69.39 | 45.01  | 0.8089887 | 0.5625   | 1.012345 | 0.7946115 |
| Sbds    | P70122 | 35   | NK(*)VVGWR(*)                 | K2  | 65.97 | 1000   | 0.7865168 | -        | -        |           |
| Kpnb1   | P70168 | 62   | VAAGLQIK(*)NSLTSK(*)          | K8  | 89.68 | 121.92 | 0.6344086 | 0.734177 | 1.244444 | 0.8710101 |
| Kpnb1   | P70168 | 859  | AK(*)TLATWATK(*)              | K2  | 86.27 | 146.5  | 0.7956989 | 0.797468 | 0.933333 | 0.8421669 |
| Pip5k1a | P70182 | 125  | FK(*)TYAPVAFR(*)              | K2  | 35.05 | 1000   | -         | -        | 0.736842 | 0.105     |
| Psemb7  | P70195 | 127  | MLK(*)QMLFR(*)                | K3  | 44.76 | 1000   | 1.5473684 | 0.936708 | 1.361702 | 1.2819265 |
| Lxn     | P70202 | 162  | MLK(*)IQTVK(*)                | K3  | 23.23 | 81.69  | 1.0782608 | 0.759493 | 1.235955 | 1.0245699 |
| Plxna1  | P70206 | 1739 | HTWK(*)SNC(+57.02)LPLR(*)     | K4  | 9.27  | 1000   | -         | 0.547619 | 0.978260 | 0.76294   |
| Itpr3   | P70227 | 608  | LLEK(*)HITK(*)                | K4  | 60.73 | 109.97 | 0.8202247 | 0.820512 | 0.756097 | 0.798945  |
| Itpr3   | P70227 | 307  | FK(*)HLATGNYLAAEENPSYK(*)     | K2  | 52.42 | 223.59 | 1.0898876 | 0.551282 | 0.841463 | 0.8275444 |
| Itpr3   | P70227 | 2596 | NK(*)NLDWFPR(*)               | K2  | 29.46 | 1000   | 1.2022471 | -        | -        |           |
| Itpr3   | P70227 | 1111 | VIK(*)SELDK(*)                | K3  | 22.56 | 1000   | -         | 0.756410 | 0.841463 | 0.7989368 |
| Vamp7   | P70280 | 121  | HHSENK(*)SLDK(*)              | K6  | 46.24 | 28.74  | -         | -        | 0.92     |           |
| Vamp7   | P70280 | 172  | TENLVDSSTFK(*)TTSR(*)         | K12 | 45.82 | 1000   | -         | -        | 1.08     |           |
| Hdac2   | P70288 | 90   | SIR(*)PDNMSEYSK(*)QMQR(*)     | K12 | 42.1  | 1000   | 0.4945054 | -        | 0.786516 | 0.6405112 |
| Hdac2   | P70288 | 201  | VMTVSFHK(*)YGEYFPGTGDLR(*)    | K8  | 40.73 | 1000   | -         | -        | 1.314606 | 0.742     |
| Hdac2   | P70288 | 32   | VC(+57.02)YYYDGDIGNYYYQGHP    | K21 | 17.89 | 1000   | -         | -        | 1.898876 | 0.404     |
| Pebp1   | P70296 | 150  | FK(*)VETFR(*)                 | K2  | 82.57 | 1000   | 0.9042553 | -        | 1.130952 | 1.0176039 |
| Pebp1   | P70296 | 93   | MK(*)GNDISSGTVLSDYVGSGPPSGT   | K2  | 41.97 | 1000   | 0.8297872 | -        | -        |           |
| Pebp1   | P70296 | 141  | YVWLVEEQEPLSC(+57.02)DEPILS   | K22 | 9.47  | 1000   | -         | -        | 2.583333 | 0.333     |
| Hnrnp2  | P70333 | 98   | SNSVEMDWVLK(*)HTGPNSPDTANC    | K11 | 51.01 | 1000   | 0.9795918 | -        | 0.793478 | 0.886535  |
| Rock1   | P70335 | 639  | ITSLQEEVK(*)HLK(*)            | K9  | 28.33 | 32.46  | 0.4040404 | -        | 0.470588 | 0.4373143 |
| Rock2   | P70336 | 310  | IMDHK(*)NSLC(+57.02)FPEDTEISK | K5  | 40.54 | 111.11 | 0.5686274 | 0.569767 | 1.057471 | 0.7319554 |
| Rock2   | P70336 | 224  | DVK(*)PDNMLLDK(*)HGHLK(*)     | K11 | 32.51 | 46.87  | 0.8823529 | 0.848837 | 0.712643 | 0.8146113 |
| Rock2   | P70336 | 511  | ALLQHK(*)NAEYQR(*)            | K6  | 19.76 | 1000   | -         | -        | 1.057471 | 0.264     |



|        |        |      |                                   |     |       |        |           |          |          |           |
|--------|--------|------|-----------------------------------|-----|-------|--------|-----------|----------|----------|-----------|
| Hint1  | P70349 | 21   | AQVAQPGGDTIFGK(*)IIR(*)           | K14 | 66.53 | 1000   | 0.9793814 | 0.746987 | 1.046511 | 0.9242937 |
| Elavl1 | P70372 | 320  | ILQVSFK(*)TNK(*)                  | K7  | 89.29 | 53.53  | 0.9157894 | 0.761904 | 0.913043 | 0.8635792 |
| Elavl1 | P70372 | 55   | DK(*)VAGHSLGYGFVNYVTAK(*)         | K2  | 73.31 | 265.69 | 0.9263157 | 0.761904 | 0.956521 | 0.8815808 |
| Elavl1 | P70372 | 191  | FAANPNQNK(*)NMALLSQLYHSPAR(       | K9  | 8.64  | 1000   | -         | -        | 1.695652 | 1.74      |
| Rad50  | P70388 | 446  | TIELK(*)TEILTK(*)                 | K5  | 49.24 | 151.71 | 1.0681818 | -        | 0.613861 | 0.8410216 |
| Usp9x  | P70398 | 447  | HEAIVK(*)NVHDLAK(*)               | K6  | 66.12 | 107.73 | 1.0744680 | 1.052631 | 1.079545 | 1.0688817 |
| Usp9x  | P70398 | 884  | GK(*)HLSFIVR(*)                   | K2  | 57.31 | 1000   | 0.7234042 | 0.842105 | 0.954545 | 0.8400183 |
| Usp9x  | P70398 | 303  | NEAK(*)NDALSMIHK(*)               | K4  | 56.99 | 85.06  | 0.6595744 | -        | 0.613636 | 0.6366054 |
| Usp9x  | P70398 | 315  | SLK(*)NLASR(*)                    | K3  | 56.73 | 1000   | -         | 0.842105 | 1.113636 | 0.9778708 |
| Usp9x  | P70398 | 329  | VPGQEETVK(*)NLEIFR(*)             | K9  | 52.75 | 1000   | 1.0531914 | -        | 1.068181 | 1.0606867 |
| Usp9x  | P70398 | 1370 | AK(*)HSGDYFTLLR(*)                | K2  | 48.46 | 1000   | 0.7553191 | 0.934210 | 1.147727 | 0.9457523 |
| Usp9x  | P70398 | 112  | GLDVK(*)SEAC(+57.02)QR(*)         | K5  | 34.78 | 1000   | 1.1276595 | 1.052631 | 1.034090 | 1.0714607 |
| Usp9x  | P70398 | 534  | IK(*)ILDYSC(+57.02)SQDR(*)        | K2  | 11.63 | 1000   | 1.2127659 | -        | -        |           |
| Cux1   | P70403 | 144  | EFAEVK(*)NQEVTK(*)                | K6  | 7.97  | 21.15  | -         | -        | -        |           |
| Idh3g  | P70404 | 149  | TSLDLYANVIHC(+57.02)K(*)SLPGV     | K13 | 22.15 | 1000   | -         | -        | 0.693181 | 1.818     |
| Bid    | P70444 | 135  | ALDEVK(*)TAFPR(*)                 | K6  | 31.64 | 1000   | 0.7058823 | 0.333333 | 0.351351 | 0.4635223 |
| Vasp   | P70460 | 343  | VK(*)QELLEVR(*)                   | K2  | 23.27 | 1000   | 1.2268041 | 1.271604 | 0.918367 | 1.1389255 |
| Ldb1   | P70662 | 271  | DC(+57.02)LK(*)TJC(+57.02)LFQK(*) | K4  | 33.46 | 94.27  | 1.1224489 | 0.811594 | 1.733333 | 1.2224588 |
| Naca   | P70670 | 2072 | SK(*)NILFVITK(*)PDVYK(*)          | K2  | 70.19 | 192.66 | 1.0219780 | -        | 1.023529 | 1.0227537 |
| Naca   | P70670 | 2054 | AMSK(*)LGLR(*)                    | K4  | 35.21 | 1000   | 1.0219780 | 0.910256 | -        | 0.9661172 |
| Casp3  | P70677 | 11   | TSVDSK(*)SINNFEVK(*)              | K6  | 69.78 | 181.66 | 1.3296703 | 0.694117 | 0.913978 | 0.9792555 |
| Casp3  | P70677 | 88   | NK(*)NDLTR(*)                     | K2  | 54.32 | 1000   | 1.1208791 | -        | 1.096774 | 1.1088267 |
| Casp3  | P70677 | 19   | SINNFEVK(*)TIHGSK(*)              | K8  | 41.55 | 49.74  | 1.1318681 | 0.988235 | 1.225806 | 1.1153033 |
| Casp3  | P70677 | 156  | PK(*)LFIIQAC(+57.02)R(*)          | K2  | 39.58 | 1000   | 1.2307692 | 1.023529 | -        | 1.1271493 |
| Casp3  | P70677 | 25   | TIHGSK(*)SVDSGIYLDSSYK(*)         | K6  | 6.65  | 75.67  | 1.6483516 | -        | -        |           |
| Urod   | P70697 | 359  | VGAFFDAVHK(*)HSR(*)               | K10 | 49.27 | 1000   | 1.4516129 | 0.652173 | 1.611111 | 1.2382993 |
| Ctps1  | P70698 | 28   | GVIASSVGITLK(*)SC(+57.02)GLHVT    | K12 | 61.46 | 44.77  | 0.9479166 | 0.986842 | 1.010638 | 0.981799  |
| Ctps1  | P70698 | 557  | LPHYLQK(*)GC(+57.02)R(*)          | K7  | 34.77 | 1000   | 1.0729166 | -        | -        |           |
| Ctps1  | P70698 | 460  | TLFQTK(*)NSVMR(*)                 | K6  | 8.92  | 1000   | -         | 1.592105 | -        |           |
| Cct7   | P80313 | 368  | AK(*)TC(+57.02)TIILR(*)           | K2  | 95.48 | 1000   | 0.9157894 | 0.797468 | 1.088888 | 0.9340489 |
| Cct7   | P80313 | 77   | LLDVVHPAAK(*)TLVDIAK(*)           | K10 | 72.73 | 61.68  | 1.1052631 | 0.911392 | 0.911111 | 0.9759222 |
| Cct7   | P80313 | 55   | GK(*)ATISNDGATILK(*)              | K2  | 54.26 | 153.88 | -         | -        | 0.811111 | 1.111     |
| Cct7   | P80313 | 401  | AIK(*)NDSVVAGGGAIEMLSK(*)         | K3  | 52.96 | 129.75 | 1.3052631 | -        | 1        | 1.1526316 |
| Cct7   | P80313 | 148  | K(*)QDK(*)VEQR(*)                 | K4  | 13.69 | 38.16  | 0.9789473 | -        | -        |           |



|       |        |     |                                  |     |       |        |           |          |          |           |
|-------|--------|-----|----------------------------------|-----|-------|--------|-----------|----------|----------|-----------|
| Cct2  | P80314 | 284 | ILK(*)HGINC(+57.02)FINR(*)       | K3  | 97.33 | 1000   | 0.9081632 | 0.825    | 1.010869 | 0.9146776 |
| Cct2  | P80314 | 191 | LK(*)GSGNLEAIHVIK(*)             | K2  | 77.42 | 223.58 | 0.9693877 | 0.875    | 0.934782 | 0.9263901 |
| Cct2  | P80314 | 72  | DAALMVTNDGATILK(*)NIGVDNPAA      | K15 | 76.68 | 59.2   | -         | -        | 1.206521 | 0.739     |
| Cct2  | P80314 | 176 | LLTHHK(*)DHFTK(*)                | K6  | 75.52 | 107.29 | 1.0204081 | 0.775    | 0.880434 | 0.8919476 |
| Cct2  | P80314 | 50  | GMDK(*)ILLSSGR(*)                | K4  | 75.46 | 1000   | 0.7448979 | 0.6625   | 0.869565 | 0.7589877 |
| Cct2  | P80314 | 181 | DHFTK(*)LAVEAVLR(*)              | K5  | 52.35 | 1000   | 0.8163265 | 0.8875   | 0.978260 | 0.8940291 |
| Cct2  | P80314 | 40  | IGAIAIGDLVK(*)STLGPK(*)          | K11 | 38.35 | 85.52  | 1.6224489 | -        | 0.923913 | 1.273181  |
| Cct2  | P80314 | 250 | IK(*)IFGSR(*)                    | K2  | 31.75 | 1000   | 1.1428571 | 0.8125   | -        | 0.9776786 |
| Cct4  | P80315 | 531 | SILK(*)IDDVVNTR(*)               | K4  | 90.05 | 1000   | 0.9479166 | 0.8125   | 0.935483 | 0.8986335 |
| Cct4  | P80315 | 126 | LLQK(*)GIHPTIIESFQK(*)           | K4  | 88.9  | 90.21  | 1         | 0.8125   | 0.956989 | 0.9231631 |
| Cct4  | P80315 | 302 | TGC(+57.02)NVLLIQK(*)SILR(*)     | K10 | 86.1  | 1000   | 0.875     | 0.7      | 0.967741 | 0.8475806 |
| Cct4  | P80315 | 384 | ITGC(+57.02)TSPGK(*)TVTIVVR(*)   | K9  | 80.86 | 1000   | 1.28125   | 0.7625   | 0.935483 | 0.993078  |
| Cct4  | P80315 | 395 | GSNK(*)LVIEEAER(*)               | K4  | 71.78 | 1000   | 0.96875   | 0.7625   | 0.752688 | 0.8279794 |
| Cct4  | P80315 | 79  | GDVTITNDGATILK(*)QMQVLHPAAR      | K14 | 50.43 | 1000   | 0.8229166 | -        | 0.935483 | 0.8792003 |
| Cct4  | P80315 | 302 | K(*)TGC(+57.02)NVLLIQK(*)SILR(*) | K11 | 43.69 | 116.35 | 0.71875   | 0.6125   | 0.967741 | 0.7663306 |
| Cct4  | P80315 | 321 | MK(*)IMVVK(*)                    | K2  | 40.69 | 142.99 | 1.0520833 | 1.075    | 0.870967 | 0.9993504 |
| Cct4  | P80315 | 55  | TSLGPK(*)GMDK(*)                 | K6  | 38.98 | 29.39  | 0.8333333 | 1.125    | -        | 0.9791667 |
| Cct4  | P80315 | 375 | LFK(*)ITGC(+57.02)TSPGK(*)       | K3  | 34.14 | 91.09  | -         | 0.725    | -        |           |
| Cct5  | P80316 | 176 | TTLGSK(*)VINSC(+57.02)HR(*)      | K6  | 74.52 | 1000   | 0.9489795 | 0.777777 | 0.902173 | 0.8763104 |
| Cct5  | P80316 | 35  | LMGLEALK(*)SHIMAAK(*)            | K8  | 70.7  | 110.43 | 0.9795918 | 0.691358 | 0.945652 | 0.8722007 |
| Cct5  | P80316 | 529 | M(+15.99)ILK(*)IDDIR(*)          | K4  | 66.49 | 1000   | 0.9387755 | 0.728395 | 0.815217 | 0.8274627 |
| Cct5  | P80316 | 265 | HK(*)LDVMSVEDYK(*)               | K2  | 60.99 | 168.62 | 1.0918367 | 0.950617 | 2.065217 | 1.3692238 |
| Cct5  | P80316 | 150 | IAIQHLDK(*)ISDK(*)               | K8  | 51.27 | 69.71  | 0.9897959 | 0.765432 | 0.967391 | 0.9075398 |
| Cct5  | P80316 | 214 | VEGK(*)VGGR(*)                   | K4  | 39.04 | 1000   | -         | 0.716049 | 0.891304 | 0.8036769 |
| Cct5  | P80316 | 170 | VLVDINNPEPLIQTAK(*)TTLGSK(*)     | K16 | 36.56 | 38     | 1.1836734 | -        | 1.326086 | 1.2548802 |
| Cct5  | P80316 | 223 | LEDTK(*)LIK(*)                   | K5  | 12.13 | 40.63  | 2.6428571 | 1.925925 | 2.739130 | 2.4359712 |
| Cct6a | P80317 | 251 | TEVNSGFFYK(*)SAEER(*)            | K10 | 93.55 | 1000   | 0.8877551 | 0.743902 | 1.127659 | 0.9197724 |
| Cct6a | P80317 | 5   | A(+42.01)AVK(*)TLNPK(*)          | K4  | 93.53 | 96.85  | 0.9183673 | 0.780487 | 0.957446 | 0.885434  |
| Cct6a | P80317 | 199 | HK(*)SETDTSLIR(*)                | K2  | 91.84 | 1000   | 0.8571428 | 0.865853 | 0.893617 | 0.8722045 |
| Cct6a | P80317 | 381 | GPNK(*)HTLTQIK(*)                | K4  | 80.15 | 186.64 | 0.8775510 | 0.682926 | 0.691489 | 0.7506557 |
| Cct6a | P80317 | 287 | VC(+57.02)GDSDK(*)GFVWINQK(*)    | K7  | 57.78 | 71.6   | -         | -        | 1.138297 | 0.7872    |
| Cct3  | P80318 | 44  | TC(+57.02)LGPK(*)SMMK(*)         | K6  | 93.67 | 69.71  | 0.84375   | 0.784810 | 0.989361 | 0.8726406 |
| Cct3  | P80318 | 78  | EIQVQHPPAAK(*)SMIEISR(*)         | K10 | 71    | 1000   | 1.1875    | 0.645569 | 0.914893 | 0.9159877 |
| Cct3  | P80318 | 469 | AK(*)HTQESC(+57.02)ETWGVNGET     | K2  | 70.33 | 219.61 | 1.3645833 | 1.202531 | 0.989361 | 1.1854922 |

|        |        |      |                                 |     |       |        |           |          |              |           |
|--------|--------|------|---------------------------------|-----|-------|--------|-----------|----------|--------------|-----------|
| Cct3   | P80318 | 31   | VQSGNINAAK(*)TIADIIR(*)         | K10 | 49.34 | 1000   | 1.0729166 | 1.025316 | 0.755319     | 0.9511841 |
| Cct3   | P80318 | 427  | SK(*)AMTGVEQWPYR(*)             | K2  | 25.77 | 1000   | 2.0416666 | 1.658227 | 1.957446     | 1.8857804 |
| Cct3   | P80318 | 163  | SSITTK(*)VISR(*)                | K6  | 7.96  | 1000   | -         | -        | 0.893617     | 0.21      |
| Wnk1   | P83741 | 1949 | FQVTTTANK(*)VGR(*)              | K9  | 49.09 | 1000   | 0.9634146 | 0.628571 | -            | 0.795993  |
| Phf5a  | P83870 | 3    | A(+42.01)K(*)HHPDLIFC(+57.02)R( | K2  | 96.03 | 1000   | 1         | 0.892857 | 0.946808     | 0.9465552 |
| Phf5a  | P83870 | 95   | IVNLGSSK(*)TDLFYER(*)           | K8  | 75.97 | 1000   | 0.9793814 | 0.833333 | 0.936170     | 0.916295  |
| Txn14a | P83877 | 88   | NK(*)HIMIDLGTGNNNK(*)           | K2  | 49.25 | 189.17 | 1.0568181 | 1.676923 | 0.978021     | 1.2372544 |
| Rpl36a | P83882 | 89   | C(+57.02)K(*)HFELGGDK(*)        | K2  | 73.12 | 135.81 | 0.8080808 | 0.8      | 0.908045     | 0.8387089 |
| Rpl36a | P83882 | 22   | HQPHK(*)VTQYK(*)                | K5  | 71.19 | 107.29 | 1         | 0.853333 | 0.896551     | 0.9166284 |
| Rpl36a | P83882 | 89   | C(+57.02)K(*)HFELGGDK(*)K(*)    | K2  | 13.99 | 154.74 | 1.2222222 | 1.333333 | 1.298850     | 1.284802  |
| Cbx1   | P83917 | 139  | WK(*)NSDEADLVPK(*)              | K2  | 67.58 | 158.48 | 0.5703703 | 0.875    | 0.720930     | 0.7221002 |
| Eloc   | P83940 | 72   | EIPSHVLSK(*)VC(+57.02)MYFTYK(*) | K9  | 52.82 | 131.34 | -         | -        | 1.217948     | 0.718     |
| Eloc   | P83940 | 80   | VC(+57.02)MYFTYK(*)VR(*)        | K8  | 17.92 | 1000   | 0.7979797 | -        | 1.782051     | 1.2900155 |
| Hpca   | P84075 | 174  | GAK(*)SDPSIVR(*)                | K3  | 61.32 | 1000   | -         | -        | -            | -         |
| Arf1   | P84078 | 127  | ANK(*)QDLPNAMNAAEITDK(*)        | K3  | 4.06  | 83.43  | -         | -        | 0.705357     | 0.143     |
| Ap2m1  | P84091 | 308  | VVIK(*)SNFK(*)                  | K4  | 75.09 | 69.71  | -         | -        | 0.896551     | 0.1724    |
| Ap2m1  | P84091 | 308  | VVIK(*)SNFK(*)PSLLAQK(*)        | K4  | 55.91 | 77.13  | 0.8421052 | 1.067567 | 0.919540     | 0.943071  |
| Ap2m1  | P84091 | 203  | VVMK(*)SYLSGMPEC(+57.02)K(*)    | K4  | 29.67 | 207.31 | -         | 2.594594 | -            | -         |
| Ap2m1  | P84091 | 345  | YK(*)ASENAIVWK(*)               | K2  | 12.33 | 137.2  | -         | -        | 1.942528     | 0.736     |
| Rhog   | P84096 | 96   | HK(*)WHPEVC(+57.02)HHC(+57.02   | K2  | 35.05 | 84.27  | 0.7474747 | -        | 1.089887     | 0.9186812 |
| Rpl19  | P84099 | 126  | HMYHSLYLK(*)VK(*)               | K9  | 89.25 | 26.31  | 0.9166666 | 0.869047 | 1.022222     | 0.9359788 |
| Rpl19  | P84099 | 133  | GNVFK(*)NK(*)                   | K5  | 85.86 | 26.31  | 0.8333333 | 0.726190 | 0.933333     | 0.8309524 |
| Rpl19  | P84099 | 80   | HMGIGK(*)R(*)                   | K6  | 29.94 | 1000   | -         | -        | 0.7444444444 | -         |
| Rpl19  | P84099 | 186  | K(*)EEIHK(*)TLISK(*)            | K6  | 26.81 | 37.48  | 0.75      | 0.809523 | -            | 0.7797619 |
| Rpl19  | P84099 | 92   | MPEK(*)VTWMR(*)                 | K4  | 13.52 | 1000   | -         | -        | 1.3          | -         |
| Rpl19  | P84099 | 181  | K(*)K(*)EEIHK(*)                | K2  | 12.15 | 1000   | 0.9375    | 0.869047 | -            | 0.9032738 |
| Srsf3  | P84104 | 23   | VYVGNLGNNGNK(*)TELER(*)         | K12 | 83.51 | 1000   | 0.77      | 0.777777 | 0.989247     | 0.845675  |
| Nptn   | P97300 | 248  | SENK(*)NEGQDAMMYC(+57.02)K(*)   | K4  | 34.64 | 176.98 | 3.3866666 | -        | -            | -         |
| Polr1d | P97304 | 15   | ISGLK(*)TSMAEGER(*)             | K5  | 25.08 | 1000   | -         | 0.852459 | -            | -         |
| Mcm2   | P97310 | 450  | DNK(*)VAVGELTDEDVK(*)           | K3  | 13.45 | 126.79 | -         | -        | 4.988888889  | -         |
| Mcm6   | P97311 | 407  | SQFLK(*)HVDEFSPR(*)             | K5  | 88.78 | 1000   | 0.8979591 | 0.753086 | 0.934065     | 0.8617038 |
| Mcm6   | P97311 | 654  | LLNK(*)SIIR(*)                  | K4  | 87.67 | 1000   | 0.8775510 | 0.864197 | 0.989010     | 0.9102532 |
| Mcm6   | P97311 | 643  | MHC(+57.02)C(+57.02)DEVQPK(*)   | K10 | 73.23 | 49.37  | 0.8571428 | 0.827160 | 0.967032     | 0.8837788 |
| Mcm6   | P97311 | 197  | FLLDTNK(*)SR(*)                 | K7  | 48.67 | 1000   | 1.1530612 | -        | 0.989010     | 1.0710361 |

|         |        |     |                                 |     |       |        |           |          |                    |           |
|---------|--------|-----|---------------------------------|-----|-------|--------|-----------|----------|--------------------|-----------|
| Mcm6    | P97311 | 326 | ELR(*)DEEQTAESIK(*)NQMTVK(*)    | K13 | 13.88 | 71.27  | -         | -        | 1.263736264        |           |
| Mcm6    | P97311 | 611 | DGSGVTK(*)SSWR(*)               | K7  | 6.52  | 1000   | -         | -        | 1.582417582        |           |
| Csrp2   | P97314 | 59  | NLDSTTVAIHDEEIYC(+57.02)K(*)SC  | K17 | 65.42 | 72.78  | 0.8396226 | -        | 1.10869510.9741591 |           |
| Csrp2   | P97314 | 137 | IIGAGK(*)PWHK(*)                | K6  | 38.35 | 87.62  | 0.6509433 | 0.813333 | 0.78260810.7489618 |           |
| Csrp2   | P97314 | 141 | IIGAGK(*)PWHK(*)NC(+57.02)FR(*) | K10 | 36.38 | 58.99  | 0.8301886 | 0.946666 | 1.20652110.994459  |           |
| Csrp2   | P97314 | 141 | PWHK(*)NC(+57.02)FR(*)          | K4  | 5.13  | 1000   | -         | -        | 1.326086957        |           |
| Csrp1   | P97315 | 141 | SWHK(*)SC(+57.02)FR(*)          | K4  | 80.61 | 1000   | 0.8703703 | 0.837209 | 1.06382910.9238032 |           |
| Csrp1   | P97315 | 173 | GC(+57.02)YAK(*)NFGPK(*)        | K5  | 71.54 | 87.95  | 0.8518518 | 0.802325 | 1.03191410.8953641 |           |
| Csrp1   | P97315 | 137 | VIGAGK(*)SWHK(*)                | K6  | 66.4  | 59.3   | 0.3425925 | 0.906976 | 0.94680810.7321259 |           |
| Csrp1   | P97315 | 59  | NLDSTTVAVHGEEIYC(+57.02)K(*)SC  | K17 | 65.81 | 77.53  | 0.8703703 | 0.662790 | 0.88297810.8053799 |           |
| Csrp1   | P97315 | 69  | YGPK(*)GYGYGQGAGTLSTDK(*)       | K4  | 36.85 | 98.97  | 1.2129629 | 1.430232 | -                  | 1.3215978 |
| Csrp1   | P97315 | 168 | GLESTTLADK(*)DGEIYC(+57.02)K(*) | K17 | 36.57 | 68.6   | 0.8703703 | 1.244186 | 0.31914810.8112351 |           |
| Kif20a  | P97329 | 452 | SK(*)QNLIPFR(*)                 | K2  | 35.51 | 1000   | 0.6083333 | 0.6875   | 0.45544510.5837596 |           |
| Nrp1    | P97333 | 772 | VLLHK(*)SLK(*)                  | K5  | 60.64 | 57.45  | 0.8421052 | 0.634408 | 1.26666610.9143935 |           |
| Nrp1    | P97333 | 356 | YYVK(*)TYR(*)                   | K4  | 10.95 | 1000   | -         | 1.440860 | -                  |           |
| Rps3a   | P97351 | 46  | NIGK(*)TLVTR(*)                 | K4  | 96.55 | 1000   | 0.8627450 | 0.759036 | 0.875              | 0.8322604 |
| Rps3a   | P97351 | 94  | LITEDVQGK(*)NC(+57.02)LTNFHGM   | K9  | 87.72 | 1000   | 0.8725490 | 0.686746 | 0.97916610.8461542 |           |
| Rps3a   | P97351 | 56  | TQGTK(*)IASDGLK(*)              | K5  | 80.2  | 148.49 | 0.7941176 | 0.734939 | 0.88541610.8048247 |           |
| Rps3a   | P97351 | 85  | FK(*)LITEDVQGK(*)               | K2  | 33.51 | 142.42 | -         | 0.337349 | -                  |           |
| Sptlc2  | P97363 | 279 | IFK(*)HNNMQSLEK(*)              | K3  | 23.03 | 76.95  | 0.9204545 | 1.252873 | 1.3                | 1.157776  |
| Sptlc2  | P97363 | 213 | QEIGNLDK(*)HEELEK(*)            | K8  | 22.62 | 36.01  | -         | 1.862068 | 1.25               | 1.5560345 |
| Atp1b3  | P97370 | 273 | VSFK(*)VTAR(*)                  | K4  | 5.01  | 1000   | -         | -        | 1.125              |           |
| Psme1   | P97371 | 166 | VFELMTNLHTK(*)LEGFHTQISK(*)     | K11 | 58.96 | 35.88  | -         | -        | 0.866666667        |           |
| Psme1   | P97371 | 13  | VHPEAQAK(*)VDVFR(*)             | K8  | 37.94 | 1000   | 1.125     | 0.828947 | 0.87777710.9439084 |           |
| Psme2   | P97372 | 156 | TK(*)VEAFQTTISK(*)              | K2  | 91.37 | 251.58 | 0.8787878 | 0.765432 | 0.90697610.8503989 |           |
| Frg1    | P97376 | 8   | A(+42.01)EYSYVK(*)STK(*)        | K7  | 12.81 | 22.34  | -         | -        | 1.404761905        |           |
| G3bp2   | P97379 | 76  | VLSLNFSEC(+57.02)HTK(*)IR(*)    | K12 | 61.19 | 1000   | 1.2621359 | 1.108108 | 0.92708310.991091  |           |
| Anxa11  | P97384 | 253 | DLK(*)SELSGNFEK(*)              | K3  | 50.86 | 174.15 | 0.6330275 | 0.681318 | 0.95698910.7571118 |           |
| Anxa11  | P97384 | 477 | MYGK(*)SLYHDITGDTSGDYR(*)       | K4  | 40.37 | 1000   | -         | -        | 0.720430108        |           |
| Lig3    | P97386 | 422 | LIK(*)HDLK(*)                   | K3  | 10.12 | 87.62  | 1.2906976 | -        | -                  |           |
| Arhgap5 | P97393 | 544 | ESLLLK(*)HIGFVYHPTK(*)          | K6  | 37.17 | 59.58  | 0.2246376 | -        | 0.54               | 0.3823188 |
| Arhgap5 | P97393 | 321 | NTFSK(*)HIEQLK(*)               | K5  | 35.9  | 90.32  | 0.5942028 | -        | 0.92               | 0.7571014 |
| Anxa4   | P97429 | 293 | LYGK(*)SLYSFIK(*)               | K4  | 73.39 | 148.49 | 0.8910891 | 0.949367 | 0.90217310.91421   |           |
| Anxa4   | P97429 | 246 | SK(*)PSYFAER(*)                 | K2  | 72.1  | 1000   | 1.0396039 | 1.556962 | 1                  | 1.1988553 |

|         |        |     |                                |     |       |        |           |          |          |           |
|---------|--------|-----|--------------------------------|-----|-------|--------|-----------|----------|----------|-----------|
| Anxa4   | P97429 | 57  | SAYK(*)STIGR(*)                | K4  | 20.86 | 1000   | 0.7920792 | 1.075949 | 1.065217 | 0.9777487 |
| Anxa4   | P97429 | 300 | SLYSFIK(*)GDTSGDYR(*)          | K7  | 12.84 | 1000   | -         | -        | 3.565217 | 391       |
| Anxa4   | P97429 | 213 | NHLLHVFDEYK(*)R(*)             | K11 | 8.86  | 1000   | 3.2376237 | -        | -        |           |
| Mprip   | P97434 | 395 | GWLTk(*)QYEDGQWK(*)            | K5  | 38.77 | 118.18 | -         | -        | 1.107142 | 857       |
| Fhl1    | P97447 | 124 | GTVVHK(*)DC(+57.02)FTC(+57.02) | K6  | 78.37 | 95.39  | 0.6428571 | 0.756410 | 1.215053 | 0.8714404 |
| Fhl1    | P97447 | 118 | AIVAGDQNVYK(*)GTVVHK(*)        | K12 | 63.44 | 43.89  | -         | 0.884615 | -        |           |
| Fhl1    | P97447 | 233 | NPITGFGK(*)GSSVVAYEGQSWHDYC    | K8  | 58.54 | 71.48  | -         | -        | 0.870967 | 742       |
| Fhl1    | P97447 | 160 | FAK(*)HC(+57.02)VK(*)          | K3  | 43.77 | 97.69  | 0.9693877 | 0.782051 | 1.043010 | 0.9314833 |
| Atp5pf  | P97450 | 79  | LK(*)QMYGK(*)                  | K2  | 44.61 | 107.29 | 1.1898734 | 1        | 1.121951 | 1.1039415 |
| Bop1    | P97452 | 7   | A(+42.01)GAC(+57.02)GK(*)PHMSF | K6  | 45.72 | 88.86  | 0.9895833 | 0.76     | -        | 0.8747917 |
| Smad4   | P97471 | 506 | MSFVK(*)GWGPDYPR(*)            | K5  | 36.91 | 1000   | -         | -        | 1.5      |           |
| Smad4   | P97471 | 106 | WPDLHK(*)NELK(*)               | K6  | 31.85 | 44.28  | 0.6860465 | 0.767123 | 0.688888 | 0.7140196 |
| Smad4   | P97471 | 110 | NELK(*)HVK(*)                  | K4  | 28.62 | 57.45  | 0.7674418 | 0.479452 | 0.655555 | 0.6341498 |
| Smarcc1 | P97496 | 60  | VWLK(*)HYK(*)                  | K5  | 57.82 | 44.84  | 0.2857142 | 0.276315 | 0.705882 | 0.4226375 |
| Smarcc1 | P97496 | 102 | HVTNPAFTK(*)LPAK(*)            | K9  | 40.36 | 42.89  | -         | -        | 1.047058 | 824       |
| Cpt1a   | P97742 | 639 | IAC(+57.02)EK(*)HQHLYR(*)      | K5  | 14.27 | 1000   | -         | -        | 0.859649 | 123       |
| Thumpd3 | P97770 | 455 | C(+57.02)FTK(*)ALSGMGHVWR(*)   | K4  | 34.55 | 1000   | -         | 0.764705 | -        |           |
| Smn1    | P97801 | 48  | AVASFk(*)HALK(*)               | K6  | 69.18 | 48.83  | 1.0769230 | -        | 0.946808 | 1.0118658 |
| Smn1    | P97801 | 52  | HALK(*)NGDIC(+57.02)ETPDK(*)PK | K4  | 16.9  | 102.09 | 2.4395604 | 1.551282 | 1.542553 | 1.8444652 |
| Fh      | P97807 | 411 | MIK(*)NVLHSAR(*)               | K3  | 59.64 | 1000   | 1         | 0.842105 | 1.129411 | 0.9905057 |
| Fh      | P97807 | 411 | PMMIK(*)NVLHSAR(*)             | K5  | 29.89 | 1000   | -         | -        | 1.035294 | 118       |
| Anp32e  | P97822 | 12  | INMELK(*)NR(*)                 | K6  | 61.29 | 1000   | 1.1523809 | 1.0375   | 1.265306 | 1.151729  |
| Anp32e  | P97822 | 113 | IK(*)DLSTVEALQNLK(*)NLK(*)     | K14 | 56.51 | 28.96  | -         | -        | 0.795918 | 367       |
| G3bp1   | P97855 | 76  | VMSQNFTNC(+57.02)HTK(*)IR(*)   | K12 | 85.84 | 1000   | 1.0967741 | 0.95     | 1.055555 | 1.0341099 |
| G3bp1   | P97855 | 36  | FYGK(*)NSSYAHGGLDSNGK(*)       | K4  | 34.5  | 47.75  | -         | -        | 0.8      |           |
| Tubb5   | P99024 | 154 | SLGGGTGSGMGTLISK(*)IR(*)       | K17 | 76.25 | 1000   | 0.9285714 | 0.746835 | 0.870967 | 0.8487915 |
| Tubb5   | P99024 | 58  | ISVYYNEATGGK(*)YVPR(*)         | K12 | 68.2  | 1000   | 0.8571428 | 0.835443 | 0.881720 | 0.8581021 |
| Tubb5   | P99024 | 336 | EVDEQMLNVQNK(*)NSSYFVEWIPNI    | K12 | 56.78 | 79.53  | -         | -        | 1.462365 | 591       |
| Tubb5   | P99024 | 297 | DAK(*)NMMAAC(+57.02)DPR(*)     | K3  | 35.51 | 1000   | -         | 0.594936 | 0.666666 | 0.6308017 |
| Tubb5   | P99024 | 154 | QLTHSLGGGTGSGMGTLISK(*)IR(*)   | K21 | 21.85 | 1000   | -         | -        | 1.215053 | 3763      |
| Tubb5   | P99024 | 297 | VFDAK(*)NMMAAC(+57.02)DPR(*)   | K5  | 12.29 | 1000   | 1.8367346 | -        | -        |           |
| Tubb5   | P99024 | 297 | ALTVPETLQQVFDAK(*)NM(+15.99)P  | K15 | 6.74  | 1000   | -         | -        | 1.698924 | 731       |
| Uqcrh   | P99028 | 83  | DHC(+57.02)VAHK(*)LFK(*)       | K7  | 74.36 | 77.24  | 0.8303571 | 1.323076 | 0.863636 | 1.0056901 |
| Gabpb1  | Q00420 | 92  | TPLHMAASEGHANIVEVLLK(*)HGAD    | K20 | 21.55 | 47.82  | -         | -        | 1.3875   |           |

|          |        |      |                                 |     |       |        |           |          |          |           |
|----------|--------|------|---------------------------------|-----|-------|--------|-----------|----------|----------|-----------|
| Hmmr     | Q00547 | 625  | ITDLK(*)NQLR(*)                 | K5  | 45.18 | 1000   | 0.8235294 | -        | 0.965517 | 0.8945233 |
| G6pdx    | Q00612 | 471  | IFTPLLHK(*)IDR(*)               | K8  | 57.89 | 1000   | 0.90625   | 0.9125   | 0.921348 | 0.9133661 |
| Yy1      | Q00899 | 401  | FAQSTNLK(*)SHILTHAK(*)          | K8  | 15.68 | 26.99  | 4.7666666 | 6.378378 | 3.712765 | 4.9526037 |
| Hnrnpul2 | Q00PI9 | 404  | VLC(+57.02)K(*)NC(+57.02)VVELNF | K4  | 55.21 | 257.85 | 1.6263736 | 0.837837 | 1.034883 | 1.1663651 |
| Hnrnpul2 | Q00PI9 | 504  | GLEEPEMDPK(*)SR(*)              | K10 | 35.7  | 1000   | 0.8021978 | 1.310810 | 0.848837 | 0.9872819 |
| Hnrnpul2 | Q00PI9 | 404  | C(+57.02)K(*)NC(+57.02)VVELNFG  | K2  | 15.56 | 134.4  | 1.8791208 | -        | 0.976744 | 1.4279325 |
| Hnrnpul2 | Q00PI9 | 295  | VC(+57.02)FEAK(*)VTQNLPMK(*)    | K6  | 5.4   | 81.59  | 0.8351648 | -        | -        | -         |
| Creb1    | Q01147 | 323  | VAVLENQNK(*)TLIEELK(*)          | K9  | 19.26 | 78.16  | -         | -        | 1.384615 | 1.5385    |
| Col1a2   | Q01149 | 1332 | TNEWGK(*)TIEYK(*)               | K6  | 75.58 | 123.86 | 1.2857142 | 1.125    | 1.114942 | 1.1752189 |
| Col1a2   | Q01149 | 1338 | TIEYK(*)TNK(*)PSR(*)            | K6  | 70.4  | 68.47  | 0.9740259 | 1.015625 | 0.816091 | 0.9352476 |
| Col1a2   | Q01149 | 1332 | K(*)TNEWGK(*)TIEYK(*)           | K7  | 61    | 69.64  | 1.1168831 | 1.171875 | 0.908045 | 1.0656014 |
| Col1a2   | Q01149 | 1230 | AQANK(*)HVVWLGETINGGSQFEYNVE    | K5  | 36.48 | 89.28  | -         | -        | 0.850574 | 1.713     |
| Col1a2   | Q01149 | 980  | GYPGSIGPTGAAGAPGPHGSVGPAGI      | K26 | 16.96 | 1000   | 2.4545454 | -        | 0.885057 | 1.6698015 |
| Top2a    | Q01320 | 1418 | TATK(*)SQSSVSTAGTK(*)           | K4  | 79.44 | 236.99 | 1.0315789 | 0.950617 | 1.139534 | 1.040577  |
| Top2a    | Q01320 | 534  | YGK(*)IMIMTDQDQDQDQSHIK(*)      | K3  | 53.46 | 170.25 | 0.7578947 | 0.629629 | 1.023255 | 0.8035934 |
| Top2a    | Q01320 | 190  | MFK(*)QTWMDNMGR(*)              | K3  | 26.37 | 1000   | 0.9263157 | 1.296296 | 1.034883 | 1.0858319 |
| Top2a    | Q01320 | 417  | FK(*)AQIQLNK(*)                 | K2  | 7.73  | 93.6   | -         | -        | 1.151162 | 1.791     |
| Sec23a   | Q01405 | 185  | MVQVHELGC(+57.02)EGISK(*)SYVF   | K14 | 52.06 | 1000   | 0.5757575 | 1.026315 | 0.863636 | 0.8219032 |
| Sec23a   | Q01405 | 392  | VFTK(*)DIHGQFK(*)               | K4  | 35.62 | 110.43 | 0.8383838 | -        | 1.238636 | 1.0385101 |
| Rsu1     | Q01730 | 89   | LK(*)HLNLGMNR(*)                | K2  | 76.84 | 1000   | 1.0108695 | 1.023255 | 1        | 1.0113751 |
| Rsu1     | Q01730 | 158  | LTK(*)LQILSLR(*)                | K3  | 67.73 | 1000   | 1         | 0.930232 | 0.847826 | 0.9260195 |
| Nme2     | Q01768 | 49   | ASEEHLK(*)QHIDLK(*)             | K7  | 76.41 | 186.64 | 1.6842105 | 0.888888 | 1        | 1.1910331 |
| Nme2     | Q01768 | 135  | EIHLWFK(*)PEELIDYK(*)           | K7  | 72.15 | 113.97 | -         | -        | 0.922222 | 2.222     |
| Vcp      | Q01853 | 251  | GILLYGPPGTGK(*)TLIAR(*)         | K12 | 77.9  | 1000   | 0.7083333 | 0.617283 | 0.835164 | 0.7202607 |
| Vcp      | Q01853 | 386  | LEILQIHTK(*)NMK(*)              | K9  | 76.01 | 50.22  | 1.0729166 | 0.802469 | 0.967032 | 0.9474729 |
| Vcp      | Q01853 | 524  | GVLFGPPGCG(+57.02)GK(*)TLLAK(*) | K12 | 66    | 56.94  | 0.9791666 | 1.530864 | 0.923076 | 1.1443693 |
| Uba1     | Q02053 | 980  | QFLDYFK(*)TEHK(*)               | K7  | 82.16 | 51.96  | 1.0319148 | 0.923076 | 0.922222 | 0.9590713 |
| Uba1     | Q02053 | 89   | GLGVEIAK(*)NIILGGVK(*)          | K8  | 75.15 | 161.77 | -         | -        | 0.877777 | 1.778     |
| Uba1     | Q02053 | 528  | LK(*)SDTAAAVR(*)                | K2  | 73.12 | 1000   | 1.1382978 | 1.243589 | 1.111111 | 1.1643329 |
| Uba1     | Q02053 | 296  | GGIVSQVK(*)VPK(*)               | K8  | 20.33 | 44.84  | -         | -        | 0.944444 | 1.444     |
| Ctnnb1   | Q02248 | 288  | MVALLNK(*)TNVK(*)               | K7  | 65.43 | 48.83  | 0.65625   | 0.623376 | 0.816326 | 0.6986511 |
| Col6a2   | Q02788 | 254  | VMK(*)HEAYGEC(+57.02)YK(*)      | K3  | 50.98 | 99.51  | 0.7722772 | 0.493827 | 0.886597 | 0.7175674 |
| Col6a2   | Q02788 | 135  | ASFTK(*)SLQGIR(*)               | K5  | 27.71 | 1000   | 3.6633663 | 10.41975 | -        | 7.0415597 |
| Nucb1    | Q02819 | 301  | EHVMK(*)NVDTNQDR(*)             | K5  | 48.41 | 1000   | 1.4105263 | 0.974025 | 1.214285 | 1.1996127 |

|         |        |      |                                  |     |       |        |           |          |             |
|---------|--------|------|----------------------------------|-----|-------|--------|-----------|----------|-------------|
| Enah    | Q03173 | 770  | LK(*)QDILDEMNR(*)                | K2  | 52.4  | 1000   | 1.1590909 | -        | -           |
| Atp5f1a | Q03265 | 218  | QTGK(*)TSIAIDTIINQK(*)           | K4  | 80.7  | 242.08 | 0.9387755 | 0.795180 | 0.945652    |
| Atp5f1a | Q03265 | 305  | DNGK(*)HALIIYDDLK(*)             | K4  | 72.99 | 256.29 | 1.0204081 | 0.855421 | 1.282608    |
| Atp5f1a | Q03265 | 45   | QK(*)TGTAEMSSILEER(*)            | K2  | 62.31 | 1000   | 0.6428571 | 0.698795 | 0.543478    |
| Atp5f1a | Q03265 | 316  | HALIIYDDLK(*)QAVAYR(*)           | K11 | 47.05 | 1000   | -         | -        | 0.836956522 |
| Atp5f1a | Q03265 | 503  | LEPSK(*)ITK(*)                   | K5  | 6.47  | 22.45  | 4.6020408 | -        | -           |
| Atp5f1a | Q03265 | 506  | ITK(*)FENAFLSHVISQHQSLGNIR(*)    | K3  | 5.21  | 1000   | -         | -        | 1.597826087 |
| Pfdn6   | Q03958 | 25   | DLSK(*)SMSGR(*)                  | K4  | 19.01 | 1000   | 1.1170212 | -        | 0.884210    |
| Rela    | Q04207 | 310  | TYETFK(*)SIMK(*)                 | K6  | 18.92 | 41.04  | 1.6375    | 0.926829 | -           |
| Nf1     | Q04690 | 2173 | VK(*)SAAVIAFR(*)                 | K2  | 41.84 | 1000   | -         | -        | 0.908045977 |
| Nf1     | Q04690 | 2424 | ILHTLLTLVNK(*)HR(*)              | K11 | 34.18 | 1000   | 0.5555555 | -        | 0.390804    |
| Yes1    | Q04736 | 236  | LVK(*)HYTEHADGLC(+57.02)HK(*)    | K3  | 12.15 | 126.66 | -         | -        | 1.295918367 |
| Top1    | Q04750 | 577  | LNTGILNK(*)HLQDLMEGLTAK(*)       | K8  | 75.71 | 29.09  | -         | -        | 0.87628866  |
| Top1    | Q04750 | 551  | VFK(*)NLQLFMENK(*)               | K3  | 73.92 | 203.33 | -         | -        | 0.783505155 |
| Top1    | Q04750 | 722  | QIALGTSK(*)LNYLDPR(*)            | K8  | 47.59 | 1000   | -         | -        | 0.81443299  |
| Top1    | Q04750 | 748  | IYNK(*)TQR(*)                    | K4  | 29.71 | 1000   | -         | 1.023255 | 0.814432    |
| Top1    | Q04750 | 293  | EMTNDEK(*)NTITNLSK(*)            | K7  | 23.84 | 75.74  | 1.1666666 | 0.825581 | 0.927835    |
| Top1    | Q04750 | 652  | SMMNLQSK(*)IDAK(*)               | K8  | 23.18 | 48.12  | -         | 1.034883 | 1.092783    |
| Top1    | Q04750 | 220  | WK(*)FLEHK(*)                    | K2  | 9.97  | 78.33  | -         | 0.534883 | 0.680412    |
| Top1    | Q04750 | 23   | LNDSHK(*)HK(*)                   | K6  | 5.8   | 39.76  | -         | -        | 1.298969072 |
| Col6a1  | Q04857 | 987  | VLVTGK(*)TAEYDVAFGER(*)          | K6  | 47.7  | 1000   | 0.8947368 | 1.092105 | -           |
| Col6a1  | Q04857 | 124  | YFGK(*)GTYTDC(+57.02)AIK(*)      | K4  | 47.44 | 113.07 | 0.8631578 | 0.855263 | 0.958333    |
| Sox9    | Q04887 | 249  | TDVQAGK(*)VDLK(*)                | K7  | 17.57 | 59.3   | -         | -        | -           |
| Cdk18   | Q04899 | 175  | DLK(*)HANIVTLHDLIHTDR(*)         | K3  | 17.42 | 1000   | -         | -        | -           |
| Rcn1    | Q05186 | 290  | NK(*)DEMLTK(*)                   | K2  | 24.41 | 77.93  | -         | -        | 1.582417582 |
| Rcn1    | Q05186 | 170  | FK(*)ASDLGDGLTATR(*)             | K2  | 16.29 | 1000   | -         | -        | 1.681318681 |
| Ptgs2   | Q05769 | 197  | FAQHFTHQFFK(*)TDHK(*)            | K11 | 71.51 | 25.7   | 1.0618556 | -        | 1.019607    |
| Hspg2   | Q05793 | 1001 | GDK(*)VTSYGGELR(*)               | K3  | 46.54 | 1000   | 0.4444444 | 14.42253 | 0.768292    |
| Hspg2   | Q05793 | 3673 | FSSGITGC(+57.02)IK(*)NLVLHTAR(*) | K10 | 35.85 | 1000   | 1.3209876 | -        | 0.987804    |
| Hspg2   | Q05793 | 1795 | SQSVR(*)PGADVTFIC(+57.02)TAK(*)  | K17 | 20.24 | 22.85  | 1.1111111 | 0.704225 | 1.109756    |
| Hspg2   | Q05793 | 606  | QFLGNK(*)VDSYGGFLR(*)            | K6  | 14.02 | 1000   | -         | -        | 1.207317073 |
| Fabp5   | Q05816 | 10   | DLEGK(*)WR(*)                    | K5  | 75.95 | 1000   | -         | -        | 0.896907216 |
| Fabp5   | Q05816 | 55   | AK(*)PDC(+57.02)IITC(+57.02)DGN  | K17 | 67.06 | 69.64  | -         | 0.597560 | 0.927835    |
| Fabp5   | Q05816 | 40   | AK(*)PDC(+57.02)IITC(+57.02)DGN  | K2  | 41.78 | 118.22 | -         | 1.878048 | 0.762886    |



|        |        |      |                                 |     |       |        |           |          |                   |
|--------|--------|------|---------------------------------|-----|-------|--------|-----------|----------|-------------------|
| Fabp5  | Q05816 | 61   | TESTVK(*)TTVFSC(+57.02)NLGEK(*) | K6  | 17.11 | 88.86  | 1.33      | -        | -                 |
| Fabp5  | Q05816 | 103  | TETVC(+57.02)TFQD GALVQHQQW     | K21 | 9.12  | 1000   | -         | -        | 1.340206186       |
| EmI1   | Q05BC3 | 274  | HYAGHNDDVK(*)C(+57.02)LAVHPD    | K10 | 36.61 | 1000   | -         | -        | 1.805555556       |
| Larp7  | Q05CL8 | 377  | VLSK(*)TEWMDLK(*)               | K4  | 31.82 | 122.76 | -         | 1.373333 | 0.9021731.1377536 |
| Eif5b  | Q05D44 | 1091 | MK(*)ILPQYIFNSR(*)              | K2  | 39.36 | 1000   | 1.2473118 | 0.987179 | 0.9080451.0475124 |
| Eif5b  | Q05D44 | 753  | IVALNK(*)IDR(*)                 | K6  | 35.11 | 1000   | 1.1290322 | 0.897435 | 1.2528731.0931139 |
| Eif5b  | Q05D44 | 1081 | QEEFK(*)HIAVFPC(+57.02)K(*)     | K5  | 29.13 | 101.72 | 0.5376344 | 1.192307 | 0.9655170.8984864 |
| Eif5b  | Q05D44 | 1181 | HFEATDILVSK(*)ISR(*)            | K11 | 23.01 | 1000   | 0.6559139 | -        | 1.7701141.2130145 |
| Cab39  | Q06138 | 297  | TQPILDILLK(*)NQTK(*)            | K10 | 54.66 | 48.12  | 1.0674157 | -        | 0.9659091.0166624 |
| Cab39  | Q06138 | 196  | HK(*)LLSAEFLEQHYDR(*)           | K2  | 22.36 | 1000   | 1.3707865 | 1.929577 | 1.5909091.6304244 |
| Cab39  | Q06138 | 45   | ATEEVSK(*)NLVAMK(*)             | K7  | 5.11  | 26.5   | -         | -        | 1.159090909       |
| Anxa7  | Q07076 | 439  | QM(+15.99)YQK(*)TLSTMIASDTSGD   | K5  | 86.4  | 1000   | 1.5168539 | -        | 0.9032251.2100399 |
| Anxa7  | Q07076 | 405  | LYYSMK(*)GAGTDDSTLVR(*)         | K6  | 50.11 | 1000   | -         | 0.797297 | 0.8172040.8072508 |
| Igf2r  | Q07113 | 1994 | HK(*)TYDLR(*)                   | K2  | 40.56 | 1000   | 1.1632653 | -        | 1.2333331.1982993 |
| Igf2r  | Q07113 | 178  | LQK(*)HDLNPLIK(*)               | K3  | 37.94 | 118.18 | -         | -        | 0.788888889       |
| Acads  | Q07417 | 306  | NAFGAPLTK(*)LQNIQFK(*)          | K9  | 28.09 | 59.03  | 1.1979166 | -        | 0.8404251.0191711 |
| Bax    | Q07813 | 128  | ALC(+57.02)TK(*)VPELIR(*)       | K5  | 44.43 | 1000   | 0.7227722 | -        | 0.7590360.7409042 |
| Cnn2   | Q08093 | 19   | GPSYGLSAEVK(*)NR(*)             | K11 | 97.6  | 1000   | 0.8571428 | 0.789473 | 0.9120870.8529015 |
| Cnn2   | Q08093 | 234  | HIYDTK(*)LGTDK(*)               | K6  | 80.53 | 115.97 | 0.8351648 | 0.697368 | 10.8441778        |
| Cnn2   | Q08093 | 74   | LQPGSVPK(*)INR(*)               | K8  | 79.29 | 1000   | 0.8681318 | 0.657894 | 0.9340650.8200308 |
| Cnn2   | Q08093 | 134  | TK(*)GLQSGVDIGVK(*)             | K2  | 68.85 | 144.29 | 0.9010989 | 0.631578 | 0.8681310.8002699 |
| Cnn2   | Q08093 | 25   | LLSK(*)YDPQK(*)                 | K4  | 43.96 | 43.82  | 1.0329670 | 0.776315 | 0.9230760.9107866 |
| Cnn2   | Q08093 | 194  | HLYDPK(*)NHILPPMDHC(+57.02)TI   | K6  | 37.12 | 53.37  | -         | -        | 0.802197802       |
| Lyar   | Q08288 | 46   | DFWGDDYK(*)SHVK(*)              | K8  | 59.55 | 42.89  | 0.9174311 | 0.941176 | 0.9270830.9285637 |
| Lyar   | Q08288 | 61   | YGGK(*)GYEAK(*)                 | K4  | 54.32 | 115.97 | -         | -        | 1.364583333       |
| Lyar   | Q08288 | 93   | K(*)PNVSPK(*)VR(*)              | K7  | 47.05 | 38.89  | -         | 0.705882 | 1.1979160.9518995 |
| Lyar   | Q08288 | 119  | FQNWMK(*)NSLK(*)                | K6  | 43.03 | 48.97  | -         | 0.870588 | 1.156251.0134191  |
| Zbtb14 | Q08376 | 284  | EQIAC(+57.02)QAC(+57.02)GK(*)TF | K10 | 17.47 | 1000   | -         | -        | -                 |
| Eps8   | Q08509 | 336  | FK(*)HGFNLLAK(*)                | K2  | 61.47 | 159.25 | 1.0232558 | 0.942028 | 0.9651160.9768004 |
| Eps8   | Q08509 | 160  | EPTQSK(*)PDLHLFQC(+57.02)DEVK   | K6  | 38.57 | 85.14  | 0.8837209 | 0.260869 | 10.7148635        |
| Ssrp1  | Q08943 | 90   | LSDFFK(*)THYR(*)                | K6  | 66.15 | 1000   | -         | -        | 0.791208791       |
| Ssrp1  | Q08943 | 566  | IK(*)SDHPGISITDLSK(*)           | K2  | 65.18 | 137.95 | 0.8762886 | 0.891566 | 0.9010980.8896513 |
| Ssrp1  | Q08943 | 304  | LTK(*)NMSGSLYEMVSR(*)           | K3  | 35.44 | 1000   | -         | -        | 1.340659341       |
| Inf2   | Q0GNC1 | 715  | LLPEK(*)HEIENLR(*)              | K5  | 70.79 | 1000   | 1.0581395 | 0.923076 | 0.9191910.9668028 |

|         |        |      |                                    |       |        |           |          |           |           |
|---------|--------|------|------------------------------------|-------|--------|-----------|----------|-----------|-----------|
| Zc3h18  | Q0P678 | 785  | APAGGK(*)ASQQAAPQPAVPGQPQ K6       | 42.66 | 61.64  | 1.4285714 | 0.982758 | 0.8571428 | 1.089491  |
| Zc3h18  | Q0P678 | 647  | K(*)PAPPPAPPQATK(*)TTAPGPEPAK K13  | 36.85 | 71.03  | -         | 0.672413 | 1.3571428 | 1.0147783 |
| Rbis    | Q0VG62 | 21   | NVFHIAHK(*)TFK(*) K9               | 46.81 | 57.45  | -         | -        | -         | -         |
| Ppp4r2  | Q0VGB7 | 231  | NK(*)HPDEDAVESEEHEVK(*) K2         | 41.36 | 148.55 | 1         | -        | 1.0430107 | 1.0215054 |
| Ppp4r2  | Q0VGB7 | 231  | NK(*)HPDEDAVESEEHEVK(*)R(*) K2     | 16.97 | 109.25 | -         | -        | 0.9892473 | 1.0215054 |
| Rtel1   | Q0VGM9 | 1162 | TQSK(*)ISSFFR(*) K4                | 39.59 | 1000   | -         | -        | -         | -         |
| Npepps  | Q11011 | 822  | ALSEEVR(*)PQDTSVIGGVAGGSK(*) K23   | 71.62 | 1000   | -         | 0.802631 | -         | -         |
| Npepps  | Q11011 | 337  | ETALLIDPK(*)NSC(+57.02)SSSR(*) K9  | 67.84 | 1000   | 0.7741935 | 0.578947 | 0.9534888 | 0.7688764 |
| Npepps  | Q11011 | 262  | SK(*)DGVC(+57.02)VR(*) K2          | 65.74 | 1000   | -         | -        | 1.0232558 | 1.0232558 |
| Npepps  | Q11011 | 737  | EHVEGK(*)QILSADLR(*) K6            | 43.49 | 1000   | 1.4516129 | 0.973684 | 0.8953488 | 1.106882  |
| Npepps  | Q11011 | 737  | FK(*)EHVEGK(*)QILSADLR(*) K8       | 36.54 | 34.81  | 0.4086021 | -        | 1.0697674 | 0.7391848 |
| Ptcd3   | Q14C51 | 539  | DK(*)HPPELQVAFADC(+57.02)AADI K2   | 36.6  | 151.7  | -         | -        | 1.0561797 | 1.0561797 |
| Nsun2   | Q1HFZ0 | 95   | EILHC(+57.02)LK(*)NK(*) K7         | 90.55 | 45.01  | 0.8817204 | 0.871794 | 0.9784946 | 0.91067   |
| Nsun2   | Q1HFZ0 | 585  | VINTGIK(*)VWC(+57.02)R(*) K7       | 69.05 | 1000   | 1.5161290 | 1.025641 | 1.8279568 | 1.4565757 |
| Nsun2   | Q1HFZ0 | 46   | ENK(*)LFEHYYQELK(*) K3             | 44.66 | 185.69 | 0.5483870 | 0.730769 | 1.1397848 | 0.8063138 |
| Specc1l | Q2KN98 | 262  | EELNQLK(*)NENR(*) K7               | 33.27 | 1000   | 0.9696969 | 1.260869 | 0.7710848 | 1.0005503 |
| Specc1l | Q2KN98 | 726  | LQDQK(*)HDMER(*) K5                | 5.84  | 1000   | -         | -        | 1.3253012 | 1.3253012 |
| Meaf6   | Q2VPQ9 | 74   | YLTNQK(*)NSNSK(*)NDR(*) K11        | 98.29 | 1000   | -         | -        | -         | -         |
| Meaf6   | Q2VPQ9 | 69   | YLTNQK(*)NSNSK(*)NDR(*) K6         | 98.29 | 1000   | -         | -        | -         | -         |
| Meaf6   | Q2VPQ9 | 69   | YLTNQK(*)NSNSK(*) K6               | 96.81 | 96.85  | -         | -        | -         | -         |
| Meaf6   | Q2VPQ9 | 6    | A(+42.01)MHNK(*)TAPPQIPDTR(*) K5   | 49.07 | 1000   | -         | -        | -         | -         |
| Dus4l   | Q32M08 | 39   | YSK(*)LAFR(*) K3                   | 10.42 | 1000   | -         | -        | -         | -         |
| Osbp    | Q3B7Z2 | 228  | VEDLSTC(+57.02)NDLIAK(*)HGTALC K13 | 71.54 | 1000   | 1.7340425 | -        | 0.97      | 1.3520213 |
| Emc10   | Q3TAS6 | 220  | NPQEQK(*)SFFAK(*) K6               | 1.06  | 35.03  | -         | -        | 0.0086206 | 0.0086206 |
| Cul4a   | Q3TCH7 | 561  | TFYLGK(*)HSGR(*) K6                | 88.39 | 1000   | 0.9479166 | 0.9      | 0.9340658 | 0.9273275 |
| Cul4a   | Q3TCH7 | 465  | LLVGK(*)SASVDAEK(*) K5             | 87.14 | 161.77 | 0.75      | 0.85     | 0.8791208 | 0.8263736 |
| Cul4a   | Q3TCH7 | 480  | LK(*)HEC(+57.02)GAAFTSK(*) K2      | 84.89 | 187.15 | 1.7708333 | -        | 1.1868138 | 1.4788233 |
| Cul4a   | Q3TCH7 | 668  | IK(*)INQIQMK(*) K2                 | 68.51 | 149.73 | 0.78125   | -        | 1.0329670 | 0.9071085 |
| Cul4a   | Q3TCH7 | 555  | LQEVFK(*)TFYLGK(*) K6              | 57.67 | 121.92 | 0.7395833 | 0.5125   | 0.8461538 | 0.6994124 |
| Cul4a   | Q3TCH7 | 330  | VK(*)GGQHALLQHWSEYIK(*) K2         | 38.77 | 120.4  | 0.8333333 | -        | 1.1318688 | 0.9826007 |
| Cul4a   | Q3TCH7 | 446  | FIHGK(*)DVFEAFYK(*) K5             | 30.79 | 159.25 | 1.4479166 | -        | 1.1318688 | 1.2898924 |
| Cul4a   | Q3TCH7 | 411  | R(*)PNK(*)PAELIAK(*)HVDISK(*) K11  | 26.7  | 35.03  | 1.1458333 | -        | 0.9230768 | 1.0344551 |
| Cul4a   | Q3TCH7 | 371  | DK(*)VDHVVEVC(+57.02)FQR(*) K2     | 26.2  | 1000   | 1.5520833 | 1.625    | 1.2197808 | 1.4656212 |
| Cul4a   | Q3TCH7 | 490  | LK(*)HEC(+57.02)GAAFTSK(*)LEGM K12 | 25.55 | 72.73  | -         | -        | 0.8901098 | 0.8901098 |

|         |        |      |                                |     |       |        |           |          |                     |
|---------|--------|------|--------------------------------|-----|-------|--------|-----------|----------|---------------------|
| Plbd2   | Q3TCN2 | 195  | LTLLQLK(*)GLEDSYEGR(*)         | K7  | 29.47 | 1000   | -         | -        | 1.021276596         |
| Khdc4   | Q3TCX3 | 93   | LQAPGK(*)SLTSNK(*)             | K6  | 87.72 | 104.48 | -         | 0.412587 | -                   |
| Stt3b   | Q3TDQ1 | 751  | FK(*)HLEEAFTSEHWLVR(*)         | K2  | 47.8  | 1000   | 0.3714285 | 0.760869 | 0.988636; 0.7069782 |
| Hp1bp3  | Q3TEA8 | 177  | AC(+57.02)FQK(*)TGASVVAIR(*)   | K5  | 34.11 | 1000   | -         | -        | 0.825581395         |
| Hp1bp3  | Q3TEA8 | 302  | VDIR(*)PQLLK(*)NALQR(*)        | K9  | 5.62  | 1000   | -         | -        | 0.953488372         |
| Aarsd1  | Q3THG9 | 235  | NK(*)SNLIFLAGNR(*)             | K2  | 53.03 | 1000   | 0.9195402 | 0.864864 | 1.117647( 0.9673507 |
| Aarsd1  | Q3THG9 | 287  | LLQK(*)NNLNLLR(*)              | K4  | 26.4  | 1000   | 1         | 0.864864 | 0.647058; 0.8373079 |
| Eif1ad  | Q3THJ3 | 90   | AEISFVLC(+57.02)K(*)NHVR(*)    | K9  | 39.09 | 1000   | -         | -        | 1.272727273         |
| Gtf2f1  | Q3THK3 | 435  | MDTG PQSLSGK(*)STPSSGDVQVTED   | K11 | 38.16 | 1000   | 1.3092783 | -        | 1.045977( 1.1776277 |
| Gtf2f1  | Q3THK3 | 169  | NK(*)VLNHFSIMQQR(*)            | K2  | 29.99 | 1000   | -         | -        | 1.08045977          |
| Gtf2f1  | Q3THK3 | 36   | NAADK(*)VNFATWNQAR(*)          | K5  | 23.54 | 1000   | -         | 1.4      | 0.586206; 0.9931034 |
| Gmps    | Q3THK7 | 389  | AELIK(*)THHNDTELIR(*)          | K5  | 55.23 | 1000   | 0.9361702 | -        | 1.182795; 1.059483  |
| Gmps    | Q3THK7 | 159  | EEIVLLTHGDSVDK(*)VADGFK(*)     | K14 | 40.19 | 33.66  | 1.0319148 | -        | 1.032258( 1.0320865 |
| Mat2a   | Q3THS6 | 303  | WVAK(*)SLVK(*)                 | K4  | 77.23 | 44.28  | -         | 0.915662 | 0.90625 0.9109563   |
| Mat2a   | Q3THS6 | 88   | EAIK(*)HIGYDDSSK(*)            | K4  | 68.11 | 77.76  | -         | -        | 0.770833333         |
| Mat2a   | Q3THS6 | 289  | DYTK(*)VDR(*)                  | K4  | 35.87 | 1000   | -         | 0.891566 | 0.791666( 0.8416165 |
| Mat2a   | Q3THS6 | 61   | VAC(+57.02)ETVAK(*)TGMILLAGEIT | K8  | 12.11 | 1000   | -         | -        | 2.447916667         |
| H2afv   | Q3THW5 | 14   | AGK(*)DSGK(*)AK(*)AK(*)        | K9  | 18.2  | 36.05  | 0.8645833 | -        | -                   |
| H2afv   | Q3THW5 | 12   | AGK(*)DSGK(*)AK(*)AK(*)        | K7  | 18.2  | 88.98  | 0.8645833 | -        | -                   |
| H2afv   | Q3THW5 | 8    | AGK(*)DSGK(*)AK(*)AK(*)        | K3  | 18.2  | 175.25 | 0.8645833 | -        | -                   |
| Usp39   | Q3TIX9 | 458  | FTK(*)NNFFVEK(*)               | K3  | 47.52 | 154.98 | 1.1034482 | 0.872340 | 0.958762; 0.9781839 |
| Pdlim7  | Q3TJD7 | 238  | YAPDK(*)TSTVLTR(*)             | K5  | 40.56 | 1000   | -         | 0.961038 | -                   |
| Smarca4 | Q3TKT4 | 471  | QK(*)HQEYLNILQHAK(*)           | K2  | 64.82 | 150.34 | 0.8333333 | 0.744186 | 0.978021; 0.8518471 |
| Smarca4 | Q3TKT4 | 94   | YNQMK(*)GMGMR(*)               | K5  | 55.14 | 1000   | 0.8333333 | 0.720930 | 0.857142; 0.8038021 |
| Smarca4 | Q3TKT4 | 1237 | VIQAGMFDQK(*)SSSHER(*)         | K10 | 31.91 | 1000   | -         | 1.034883 | 0.736263; 0.8855737 |
| Smarca4 | Q3TKT4 | 1033 | GGTK(*)TLMNTIMQLR(*)           | K4  | 19.46 | 1000   | 1.2777777 | -        | 1.472527; 1.3751526 |
| Cwc27   | Q3TKY6 | 126  | ADELNNK(*)HTIFGK(*)            | K7  | 49.21 | 85.52  | 1.0784313 | -        | 0.987951; 1.0331916 |
| Cwc27   | Q3TKY6 | 299  | DASASVK(*)SAGDGEK(*)           | K7  | 16.3  | 62.93  | 1.2745098 | 0.61     | 2.253012( 1.379174  |
| Cwc27   | Q3TKY6 | 230  | SK(*)SSHDLK(*)                 | K2  | 13.22 | 100.04 | -         | 1.66     | 2.180722; 1.9203614 |
| Prrc2c  | Q3TLH4 | 49   | HGLQSLGK(*)VGISR(*)            | K8  | 64.66 | 1000   | 1.0434782 | 0.731343 | 0.896551; 0.8904578 |
| Micall2 | Q3TN34 | 193  | AAPGTAGSSVSSIC(+57.02)GVC(+57  | K19 | 52.2  | 1000   | 1.5189873 | 0.692307 | 1.056818; 1.0893711 |
|         | Q3TQI7 | 6    | ITGK(*)TFR(*)                  | K4  | 99.42 | 1000   | 1.8076923 | 1.254545 | 1.171428; 1.4112221 |
| Tex30   | Q3TUU5 | 86   | AVLNYLK(*)TSGEYK(*)            | K7  | 17.68 | 35.17  | 1.9480519 | -        | -                   |
| Wdr70   | Q3TWF6 | 517  | LC(+57.02)VVK(*)TQR(*)         | K5  | 27.1  | 1000   | -         | -        | 0.597222222         |

|         |        |      |                                 |     |       |        |           |          |                    |
|---------|--------|------|---------------------------------|-----|-------|--------|-----------|----------|--------------------|
| Pip4p1  | Q3TWL2 | 185  | VIC(+57.02)GHC(+57.02)K(*)NTFLV | K7  | 40.55 | 1000   | -         | -        | 1.586206897        |
| Trmt1   | Q3TX08 | 569  | AR(*)PGGK(*)AASEDLAGR(*)        | K6  | 40.1  | 1000   | 0.8241758 | -        | 0.80519410.8146853 |
| Trmt1   | Q3TX08 | 482  | VSLSHAC(+57.02)K(*)NAVK(*)      | K8  | 14.55 | 41.04  | -         | 1.479452 | 1.3246751.4020637  |
| Psm1    | Q3TXS7 | 720  | VINDK(*)HDDVMAK(*)              | K5  | 68.37 | 186.64 | 0.9456521 | 0.779220 | 0.9139780.8796171  |
| Psm1    | Q3TXS7 | 354  | NNNTDLMILK(*)NTK(*)             | K10 | 60.01 | 22.34  | 1.4782608 | 1.025974 | 11.1680783         |
| Psm1    | Q3TXS7 | 715  | QLYSK(*)VINDK(*)                | K5  | 55.97 | 68.6   | 0.9456521 | 0.870129 | 1.0967740.9708521  |
| Cybc1   | Q3TYS2 | 81   | VILK(*)TFSLYK(*)                | K4  | 40.34 | 76.27  | 0.8409090 | 0.644736 | 0.9740250.8198906  |
| Smyd5   | Q3TYX3 | 34   | GK(*)GLFATQLIR(*)               | K2  | 74.17 | 1000   | 0.6565656 | 0.916666 | 0.7840900.7857744  |
| Smyd5   | Q3TYX3 | 182  | DK(*)DHWVR(*)                   | K2  | 44.05 | 1000   | 0.8989898 | -        | 1.1022721.0006313  |
| Nol9    | Q3TZX8 | 255  | FVDFLK(*)TYK(*)                 | K6  | 9.66  | 20.7   | -         | 1.290697 | -                  |
| Esyt2   | Q3TZZ7 | 335  | GK(*)SDPYGIIR(*)                | K2  | 11.45 | 1000   | -         | 1.1      | -                  |
| Tbc1d2b | Q3U0J8 | 658  | EMAC(+57.02)SPELK(*)NLIR(*)     | K9  | 17.04 | 1000   | -         | 0.655172 | -                  |
| Ogfod1  | Q3U0K8 | 446  | WK(*)TGHYTLVHDNTK(*)            | K2  | 31.11 | 142.32 | 1.5056179 | 0.369565 | 1.2077921.0276585  |
| Khsrp   | Q3U0V1 | 360  | IQFK(*)QDDGTGPEK(*)             | K4  | 62.33 | 140.39 | 0.6847826 | 1.066666 | 0.7802190.8438897  |
| Khsrp   | Q3U0V1 | 170  | GGEQINK(*)IQQDSGC(+57.02)K(*)   | K7  | 43.67 | 150.63 | -         | 0.346666 | 0.7362630.5414652  |
| Khsrp   | Q3U0V1 | 252  | AGLVIGK(*)GGETIK(*)             | K7  | 39.72 | 41.24  | 0.7282608 | 0.813333 | -0.7707971         |
| Ddb1    | Q3U1J4 | 191  | HVK(*)TYEVSLR(*)                | K3  | 80.92 | 1000   | 0.9484536 | 0.911392 | 0.8762880.9120449  |
| Ddb1    | Q3U1J4 | 141  | LYDGLFK(*)VIPLDR(*)             | K7  | 74.65 | 1000   | -         | -        | 0.917525773        |
| Ddb1    | Q3U1J4 | 1067 | SVGK(*)IEHSFWR(*)               | K4  | 64.01 | 1000   | 0.9793814 | 0.936708 | 0.8659790.9273566  |
| Ddb1    | Q3U1J4 | 915  | TEC(+57.02)NHYNNIMALYLK(*)TK(*) | K15 | 51.23 | 22.85  | 1.0103092 | 1.455696 | 0.8350511.1003523  |
| Ddb1    | Q3U1J4 | 917  | TK(*)GDFILVGDLMR(*)             | K2  | 48.77 | 1000   | 0.9072164 | -        | 0.9690720.9381443  |
| Sec24a  | Q3U2P1 | 907  | QK(*)SFQTGTSIR(*)               | K2  | 30.54 | 1000   | 2.65625   | 2.211267 | 1.0697671.979095   |
| Rnf40   | Q3U319 | 250  | LQDLATQLQEK(*)HHR(*)            | K11 | 58.15 | 1000   | 1.0340909 | 1.285714 | 0.9494941.0897667  |
| Rnf40   | Q3U319 | 420  | GLLLASK(*)NSHLR(*)              | K7  | 47.94 | 1000   | 0.9886363 | 0.928571 | 0.8282820.9151635  |
|         | Q3U4G0 | 50   | FPSQSQATLLSIFSQEYQK(*)HIK(*)    | K19 | 69.34 | 32.97  | -         | -        | -                  |
| Wdr75   | Q3U821 | 621  | PLYIQK(*)NVSIR(*)               | K6  | 89.93 | 1000   | 1.0365853 | 0.881578 | 0.8863630.9348426  |
| Wdr75   | Q3U821 | 213  | FTC(+57.02)VAC(+57.02)HPK(*)EDC | K9  | 37.33 | 40.04  | 1.0365853 | -        | 11.0182927         |
| Wdr75   | Q3U821 | 135  | LPK(*)STSQDVEAR(*)              | K3  | 28.35 | 1000   | -         | -        | 0.920454545        |
| Col5a2  | Q3U962 | 1415 | NTVGYMDDQAK(*)NLK(*)            | K11 | 22.72 | 24.24  | 2.2903225 | -        | -                  |
| Col5a2  | Q3U962 | 1457 | NGNVGK(*)TIFEYR(*)              | K6  | 8.32  | 1000   | -         | -        | 0.916666667        |
| Trip13  | Q3UA06 | 185  | VVLLHGPPGTGK(*)TSLC(+57.02)K(*) | K12 | 66.26 | 70.86  | 0.9156626 | 0.714285 | 0.9157890.8485793  |
| Spc25   | Q3UA16 | 67   | MTEMILEYK(*)NQLC(+57.02)K(*)    | K9  | 18.66 | 43.82  | 7.2571428 | -        | 3.51764715.387395  |
| Qrich1  | Q3UA37 | 638  | YFLK(*)TVDQHMK(*)               | K5  | 11.52 | 100.04 | -         | 2.181818 | 1.3928571.7873377  |
| Tmem109 | Q3UBX0 | 215  | SSGSHLEAK(*)VR(*)               | K9  | 69.44 | 1000   | -         | 1.4      | 0.8556701.1278351  |

|          |        |      |                                |     |       |        |           |          |                    |
|----------|--------|------|--------------------------------|-----|-------|--------|-----------|----------|--------------------|
| Otulin   | Q3UCV8 | 180  | FDGK(*)SEDLVEK(*)              | K4  | 7.84  | 38.64  | -         | -        | 1.654320988        |
| Puf60    | Q3UEB3 | 173  | SIDMSWDSVTMK(*)HK(*)           | K12 | 90.81 | 24.32  | 0.9468085 | 0.7875   | 0.978021(0.9041102 |
| Puf60    | Q3UEB3 | 258  | IK(*)SC(+57.02)TLAR(*)         | K2  | 78.64 | 1000   | -         | 0.8875   | 1.065934(0.976717  |
| Puf60    | Q3UEB3 | 272  | HK(*)GYGFIEYEK(*)              | K2  | 51.34 | 178.84 | 1.1276595 | -        | -                  |
| Puf60    | Q3UEB3 | 85   | YAMEQSIK(*)SVLVK(*)            | K8  | 39.77 | 56.51  | -         | 1.3      | 1.318681(1.3093407 |
| Zyg11b   | Q3UFS0 | 237  | ELK(*)HLNHLDISDDK(*)           | K3  | 32.11 | 56.41  | 2.3333333 | -        | 1.421875 1.8776042 |
| Gpatch11 | Q3UFS4 | 107  | TGK(*)SGIGHESLTK(*)            | K3  | 18.12 | 137.5  | -         | -        | 0.826086957        |
| Nt5c3b   | Q3UFY7 | 205  | GQLIHTYNK(*)NSSVC(+57.02)ENSSV | K9  | 29    | 163.39 | 1.3853211 | 1.256410 | 1.148148(1.2632932 |
| Dip2b    | Q3UH60 | 273  | VSTK(*)IQQLNLTLLK(*)           | K4  | 35.02 | 178.84 | -         | -        | 1.011494253        |
| Snx27    | Q3UHD6 | 46   | IVK(*)SESGYGFNVR(*)            | K3  | 50.75 | 1000   | -         | -        | 0.780821918        |
| Zswim8   | Q3UHH1 | 593  | VLGGTGSGLK(*)SSAGSGSK(*)       | K10 | 15.43 | 75.74  | -         | -        | 1.085714286        |
| Nol8     | Q3UHX0 | 156  | VLPVLHLK(*)NQQLK(*)            | K8  | 42.44 | 48.12  | -         | -        | 1.166666667        |
| Pdap1    | Q3UHX2 | 132  | MHLAGK(*)TEQAK(*)              | K6  | 75.13 | 119.54 | 1.2555555 | 1.027027 | 1.113636(1.132073  |
| Pdap1    | Q3UHX2 | 137  | TEQAK(*)ADLAR(*)               | K5  | 16.01 | 1000   | -         | 0.783783 | 1.011363(0.8975737 |
| Ndufb6   | Q3UIU2 | 58   | DGAVWK(*)NMVFK(*)              | K6  | 36.8  | 80.41  | -         | -        | 2                  |
| Edc4     | Q3UJB9 | 1097 | SK(*)NLTDIAIR(*)               | K2  | 38.61 | 1000   | 1.5666666 | -        | -                  |
| Edc4     | Q3UJB9 | 1388 | LFQFLQADPHNSLSK(*)AAR(*)       | K15 | 6.83  | 1000   | -         | -        | 1.311827957        |
| Tax1bp1  | Q3UKC1 | 47   | SK(*)DWVVGIFK(*)               | K2  | 23.44 | 109.53 | -         | -        | 0.881355932        |
| Smu1     | Q3UKJ7 | 214  | FGQK(*)SHVEC(+57.02)AR(*)      | K4  | 32.65 | 1000   | 1.2307692 | 1.08     | 1.081395(1.1307215 |
| Ppp1r7   | Q3UM45 | 102  | VK(*)SLC(+57.02)LR(*)          | K2  | 82.2  | 1000   | 0.9456521 | 0.855263 | 1.032967(0.9446275 |
| Washc4   | Q3UMB9 | 813  | TSNNK(*)HLNTINIR(*)            | K5  | 23.13 | 1000   | 1.21875   | -        | 1.094736(1.1567434 |
| Cobll1   | Q3UMF0 | 309  | EQTASAPATPLVSK(*)HR(*)         | K14 | 11.78 | 1000   | 1.6746987 | 1.211267 | 1.176470(1.3541457 |
| Cdk10    | Q3UMM4 | 178  | GC(+57.02)VK(*)TADFGRLAR(*)    | K4  | 48.32 | 1000   | -         | -        | -                  |
| Hdgfl2   | Q3UMU9 | 550  | VLGPK(*)VEALQK(*)              | K5  | 22.64 | 37.35  | 2.0430107 | -        | 1.534883(1.7889472 |
| Hdgfl2   | Q3UMU9 | 483  | FALK(*)VDNPDVLR(*)             | K4  | 11.51 | 1000   | 1.9569892 | 4.84     | 2.906976(3.2346553 |
| Lclat1   | Q3UN02 | 366  | FLHK(*)HPLHNSK(*)              | K4  | 39.64 | 148.49 | 1.1686746 | 1.128571 | 0.903614(1.0669535 |
| Lclat1   | Q3UN02 | 112  | IC(+57.02)LK(*)SSLK(*)         | K4  | 37.84 | 52.86  | 0.6024096 | 1        | 0.855421(0.8192771 |
| Zc3hav1  | Q3UPF5 | 222  | EHGLSSDVVQNIQDIC(+57.02)NNK(   | K19 | 53.92 | 1000   | 0.7924528 | -        | 1.126315(0.9593843 |
| Zc3hav1  | Q3UPF5 | 619  | GC(+57.02)QQVNC(+57.02)NK(*)NI | K9  | 11.19 | 1000   | 1.2075471 | 0.948717 | - 1.0781326        |
| Sec31a   | Q3UPL0 | 646  | EIVESC(+57.02)DLK(*)NWR(*)     | K9  | 73.87 | 1000   | 1.0744680 | 0.779220 | 0.916666(0.9234518 |
| Sec31a   | Q3UPL0 | 509  | IALALNK(*)VDGPDVALK(*)         | K7  | 63.76 | 153.19 | 0.8723404 | -        | 0.84375 0.8580452  |
| Sec31a   | Q3UPL0 | 660  | AK(*)PDEFSALC(+57.02)DLLGTR(*) | K2  | 60    | 1000   | -         | -        | 0.989583333        |
| Sec31a   | Q3UPL0 | 71   | YHK(*)LIWGPHK(*)               | K3  | 48.84 | 142.27 | 1.0319148 | 0.740259 | 0.927083(0.8997527 |
| Sec31a   | Q3UPL0 | 487  | GK(*)YLELLGYR(*)               | K2  | 43.31 | 1000   | -         | -        | 0.96875            |

|         |        |      |                                |     |       |        |           |          |          |           |
|---------|--------|------|--------------------------------|-----|-------|--------|-----------|----------|----------|-----------|
| Sec31a  | Q3UPL0 | 634  | LITAVVMK(*)NWR(*)              | K8  | 42.29 | 1000   | 0.7978723 | 1.051948 | 0.989583 | 0.9464679 |
| Sec31a  | Q3UPL0 | 619  | YFAK(*)SQSK(*)                 | K4  | 29.52 | 52.34  | 1.0957446 | -        | 0.71875  | 0.9072473 |
| Sec31a  | Q3UPL0 | 619  | K(*)YFAK(*)SQSK(*)             | K5  | 28.34 | 22.99  | -         | 1.259740 | 0.791666 | 1.0257035 |
| Sec31a  | Q3UPL0 | 477  | LK(*)VNFEEDSR(*)               | K2  | 25.82 | 1000   | 0.9255319 | 1.428571 | 0.729166 | 1.0277567 |
| Tex10   | Q3URQ0 | 528  | FFSK(*)IYQK(*)                 | K4  | 14.33 | 41.04  | -         | 1.904109 | 1.443396 | 1.6737529 |
| Ovos    | Q3UU35 | 1071 | QK(*)SNGC(+57.02)FR(*)         | K2  | 5.18  | 1000   | -         | -        | -        | -         |
| Tbc1d24 | Q3UUG6 | 319  | ALR(*)QK(*)GITVK(*)QK(*)       | K10 | 1.79  | 32.28  | -         | -        | -        | -         |
| Tbc1d24 | Q3UUG6 | 314  | ALR(*)QK(*)GITVK(*)QK(*)       | K5  | 1.79  | 71.72  | -         | -        | -        | -         |
| Ncbp1   | Q3UYV9 | 574  | FHEVFK(*)TLAESDK(*)            | K6  | 52.78 | 81.81  | 1.1789473 | 1.070588 | 0.819148 | 1.0228948 |
| Lrrfip1 | Q3UZ39 | 168  | EK(*)HAHSILQFQFAEVK(*)         | K2  | 70.71 | 179.71 | -         | 0.955223 | 1.096385 | 1.0258047 |
| Lrrfip1 | Q3UZ39 | 394  | GSFEP(+57.02)PDYILGQTAEIDK(*)  | K19 | 54.59 | 1000   | -         | -        | 0.879518 | 0.72      |
| Lrrfip1 | Q3UZ39 | 233  | EELNALK(*)SAGEGLTK(*)          | K7  | 27.24 | 72.62  | 1.4268292 | 0.582089 | 1.397590 | 1.1355031 |
| Esf1    | Q3V1V3 | 832  | NK(*)TEQFQAR(*)                | K2  | 21.97 | 1000   | -         | 1.441558 | -        | -         |
| Mthfd1l | Q3V3R1 | 890  | DIELSPEAQSK(*)IDR(*)           | K11 | 54.76 | 1000   | 0.6276595 | 0.821917 | 0.648351 | 0.6993097 |
| Mthfd1l | Q3V3R1 | 546  | LGIHK(*)TDPSTLTEEEVR(*)        | K5  | 46.41 | 1000   | 0.7765957 | -        | 0.725274 | 0.7509352 |
| Srbd1   | Q497V5 | 542  | TLMGVDPGYK(*)HGC(+57.02)K(*)   | K10 | 39.92 | 28.74  | -         | 1.418604 | -        | -         |
| Pds5b   | Q4VA53 | 528  | AIFSK(*)VMVITR(*)              | K5  | 75.87 | 1000   | 0.6274509 | 0.614457 | 0.888888 | 0.7102659 |
| Pds5b   | Q4VA53 | 964  | QC(+57.02)LVK(*)NITVR(*)       | K5  | 70.06 | 1000   | 0.7254901 | 0.698795 | 1.141414 | 0.8552332 |
| Pds5b   | Q4VA53 | 693  | VAEAAALQIFK(*)NTGSK(*)         | K10 | 41.8  | 32.32  | 0.4313725 | 0.975903 | 0.929292 | 0.7788564 |
| Pds5b   | Q4VA53 | 840  | WLLGMK(*)NNHSK(*)              | K6  | 41.43 | 23.49  | -         | -        | 0.878787 | 0.79      |
| Pds5b   | Q4VA53 | 121  | GLEDTK(*)SPQFNR(*)             | K6  | 15.48 | 1000   | 1.0784313 | 1.253012 | 1.151515 | 1.1609862 |
| Cdv3    | Q4VAA2 | 226  | K(*)TPQGPPEIYSDTQFPSLQSTAK(*)  | K23 | 56.24 | 146.29 | 0.6739130 | 1.260273 | 1.192771 | 1.0423194 |
| Ddx17   | Q501J6 | 234  | LIDFLESGK(*)TNLR(*)            | K9  | 73.23 | 1000   | 0.8842105 | 0.975609 | 0.923076 | 0.9276324 |
| Ddx17   | Q501J6 | 341  | ENK(*)TIIFVETK(*)              | K3  | 72.01 | 71.6   | 0.6631578 | 0.560975 | 0.758241 | 0.6607918 |
| Ddx17   | Q501J6 | 53   | FEK(*)NFYVEHPEVAR(*)           | K3  | 64.28 | 1000   | 0.9368421 | 0.792682 | 0.945054 | 0.8915267 |
| Ddx17   | Q501J6 | 436  | STNK(*)GTAYFTFTPGNLK(*)        | K4  | 35.86 | 123.75 | 0.5894736 | -        | 0.538461 | 0.5639676 |
| Phactr4 | Q501J7 | 686  | SSEMEVHVDSK(*)HFTR(*)          | K11 | 12.05 | 1000   | -         | -        | 2.241935 | 0.484     |
| Ankrd28 | Q505D1 | 95   | AVASC(+57.02)SEEAVQILLK(*)HSAD | K15 | 29.76 | 1000   | -         | -        | 1.074766 | 0.355     |
| Ccnl1   | Q52KE7 | 205  | ELGFC(+57.02)VHVK(*)HPPHK(*)   | K9  | 17.56 | 38.26  | -         | -        | 1.680851 | 0.064     |
| Ddx46   | Q569Z5 | 776  | SSGFSGK(*)GFK(*)               | K7  | 51.63 | 57.45  | 0.93      | -        | -        | -         |
| Ddx46   | Q569Z5 | 263  | SGPTVTK(*)VTVVTTK(*)           | K7  | 50.76 | 118.18 | 0.88      | 0.701298 | 1.032258 | 0.8711856 |
| Ddx46   | Q569Z5 | 470  | FSK(*)TLGLR(*)                 | K3  | 38.44 | 1000   | 0.72      | -        | -        | -         |
| Thrap3  | Q569Z6 | 555  | GDFSSGK(*)SSFSITR(*)           | K7  | 91.97 | 1000   | 1.0659340 | 1.041666 | 0.882978 | 0.9968598 |
| Thrap3  | Q569Z6 | 452  | FMSK(*)VIAGASK(*)              | K4  | 71.54 | 128.65 | 1.0769230 | 1.194444 | 1        | 1.0904558 |



|         |        |      |                                  |     |       |        |           |          |                     |
|---------|--------|------|----------------------------------|-----|-------|--------|-----------|----------|---------------------|
| Thrap3  | Q569Z6 | 548  | LGSK(*)GDFSSGK(*)                | K4  | 26.76 | 86.63  | -         | 1.027777 | -                   |
| Thrap3  | Q569Z6 | 468  | SGK(*)WESLHTGK(*)                | K3  | 11.95 | 113.97 | -         | 1.055555 | -                   |
| Urb1    | Q571H0 | 1798 | DK(*)HC(+57.02)YELC(+57.02)SR(*) | K2  | 51.49 | 1000   | 1.7457627 | -        | 1.2891561 1.5174597 |
| Spag9   | Q58A65 | 431  | NALNVVK(*)NDLIAK(*)              | K7  | 21.71 | 95.35  | 1.1777777 | 1.1      | 1 1.0925926         |
| Spag9   | Q58A65 | 1059 | C(+57.02)MTVVHDK(*)VWC(+57.02)   | K8  | 21.41 | 1000   | -         | -        | 1.59375             |
| Ndufaf2 | Q59J78 | 101  | IK(*)SQDFYEK(*)                  | K2  | 20.26 | 147.63 | 1.5270270 | 0.473684 | 1.5285714 1.1764276 |
| Tut7    | Q5BLK4 | 157  | R(*)LFQK(*)DLSSLEAM(+15.99)SEM   | K5  | 4     | 46.26  | 0.0225563 | -        | -                   |
| Kansl1l | Q5DTI6 | 863  | AYSK(*)NVEGQDLVLK(*)             | K4  | 96.86 | 251.58 | -         | -        | -                   |
| Kansl1l | Q5DTI6 | 852  | WSLWEQSK(*)WHR(*)                | K8  | 25.26 | 1000   | -         | -        | -                   |
| Usp22   | Q5DU02 | 59   | AK(*)SC(+57.02)VC(+57.02)HVC(+5  | K2  | 57.93 | 1000   | -         | -        | -                   |
| Ehmt1   | Q5DW34 | 430  | GK(*)TDSPWIK(*)                  | K2  | 28.39 | 120.29 | 0.7530864 | -        | -                   |
| Prkaa1  | Q5EG47 | 280  | EHEWFK(*)QDLPK(*)                | K6  | 41.19 | 68.6   | -         | -        | 0.781609195         |
| Tmem256 | Q5F285 | 46   | ANK(*)HHFLHSLALLGVPSC(+57.02)    | K3  | 41.75 | 1000   | 1.2       | -        | -                   |
| Nufip2  | Q5F2E7 | 664  | AAIVYHTK(*)EMESIWNLQK(*)         | K8  | 33.88 | 150.82 | -         | -        | 0.811111111         |
| Nufip2  | Q5F2E7 | 293  | GK(*)PAMGDVLR(*)                 | K2  | 15.11 | 1000   | 1.7571428 | 1.1      | - 1.4285714         |
| Arhgap1 | Q5FWK3 | 218  | YDDFLK(*)STQK(*)                 | K6  | 29.57 | 38.26  | -         | -        | 0.779069767         |
| Vps13a  | Q5H8C4 | 39   | GAVALK(*)NLVIK(*)                | K6  | 46.15 | 127.18 | 0.5762711 | 0.331081 | 0.5900621 0.4991381 |
| Taf3    | Q5HZG4 | 266  | PLETK(*)SFTPK(*)                 | K5  | 55.73 | 65.71  | -         | -        | -                   |
| Ttf2    | Q5NC05 | 790  | LSILTK(*)SLLLR(*)                | K6  | 37.71 | 1000   | -         | -        | 0.887640449         |
| Trappc1 | Q5NCF2 | 70   | YK(*)LHYETPTGIK(*)               | K2  | 42.31 | 122.88 | -         | -        | 1.127906977         |
| Mdc1    | Q5PSV9 | 947  | LSC(+57.02)QTTAGK(*)ASR(*)       | K10 | 17.88 | 1000   | -         | 1.361111 | -                   |
| Mdc1    | Q5PSV9 | 1418 | TVPLGHK(*)SYSALSEPEPQSSASQSSC    | K7  | 9.7   | 1000   | -         | 0.930555 | -                   |
| Igf2bp2 | Q5SF07 | 210  | EGLTIK(*)NITK(*)                 | K6  | 34.39 | 28.74  | 0.8172043 | 0.666666 | 1.1020401 0.8619706 |
| Rbm27   | Q5SFM8 | 734  | MMGK(*)PQTSGAYVLNK(*)            | K4  | 8.27  | 73.38  | -         | 1.465346 | -                   |
| Tom1l2  | Q5SRX1 | 106  | IISPK(*)NNPPTIVQDK(*)            | K5  | 31.51 | 133.99 | 1.0514705 | 0.691056 | 0.6416661 0.7947314 |
| Psme4   | Q5SSW2 | 156  | ILYSK(*)TEHLR(*)                 | K5  | 51.21 | 1000   | 0.9195402 | 0.955882 | 1.2025311 1.0259847 |
| Psme4   | Q5SSW2 | 908  | IIGDLLHFQGSBK(*)HEFDSR(*)        | K13 | 34.28 | 1000   | 0.9195402 | -        | 1.0886071 1.0040739 |
| Psme4   | Q5SSW2 | 1499 | LTQVYK(*)NVR(*)                  | K6  | 26.9  | 1000   | 0.9195402 | 1.205882 | 1.2278481 1.1177569 |
| Psme4   | Q5SSW2 | 916  | WK(*)SFNLVK(*)                   | K2  | 12.08 | 95.35  | -         | 1.573529 | -                   |
| Ctc1    | Q5SUQ9 | 913  | MK(*)PGNAGAIK(*)                 | K2  | 22.04 | 46.68  | -         | 1.132530 | 1.2558131 1.194172  |
| Ctc1    | Q5SUQ9 | 921  | MK(*)PGNAGAIK(*)TGVK(*)          | K10 | 17.12 | 26.57  | 1.1262135 | 1.048192 | - 1.0872032         |
| Pfas    | Q5SUR0 | 682  | YLTNK(*)VDR(*)                   | K5  | 59.19 | 1000   | 0.7582417 | 1.519480 | 1.1976741 1.1584656 |
| Pfas    | Q5SUR0 | 236  | HWFFK(*)GQLHVDGK(*)              | K5  | 49.73 | 135.81 | 0.9780219 | 1.168831 | 0.9651161 1.0373231 |
| Pfas    | Q5SUR0 | 847  | HPGGK(*)GHLLYVPLSPGQHR(*)        | K5  | 21.36 | 1000   | 1.1868131 | 1.493506 | 1.6860461 1.4554554 |

|          |        |      |                               |     |       |        |           |          |             |           |
|----------|--------|------|-------------------------------|-----|-------|--------|-----------|----------|-------------|-----------|
| Kat7     | Q5SVQ0 | 201  | C(+57.02)PTPGC(+57.02)NSLGHLT | K15 | 70.47 | 1000   | 0.75      | 0.504672 | 0.877777    | 0.7108169 |
| Tbc1d9b  | Q5SVR0 | 831  | AK(*)HLASQYWGGNR(*)           | K2  | 19.6  | 1000   | 5.2142857 | 0.231660 | 0.647058    | 2.0310016 |
| Cluh     | Q5SW19 | 824  | SAK(*)HIFK(*)                 | K3  | 25.21 | 97.69  | 0.875     | 0.780487 | 0.802083    | 0.8191904 |
| Cluh     | Q5SW19 | 1161 | VYESK(*)AEFR(*)               | K5  | 12.87 | 1000   | 0.5384615 | -        | -           |           |
| Tsr1     | Q5SWD9 | 130  | MLLC(+57.02)PSLK(*)HR(*)      | K8  | 47.16 | 1000   | 0.4720496 | 0.461538 | 0.875       | 0.6028627 |
| Tsr1     | Q5SWD9 | 759  | LK(*)SQDTVLMNLYK(*)           | K2  | 29    | 194.69 | 0.6583850 | 1.021978 | 0.413461    | 0.6979416 |
| Acaca    | Q5SWU9 | 740  | ITIGNK(*)TC(+57.02)VFEK(*)    | K6  | 80.12 | 112.31 | -         | 0.721518 | 1.091954    | 0.9067365 |
| Acaca    | Q5SWU9 | 1315 | EFTQQNK(*)ATLVEHGIR(*)        | K7  | 74.24 | 1000   | 0.6413043 | 0.455696 | 0.908045    | 0.6683488 |
| Acaca    | Q5SWU9 | 2208 | GVINDILDWK(*)TSR(*)           | K10 | 34.78 | 1000   | -         | -        | 1.206896552 |           |
| Acaca    | Q5SWU9 | 1434 | HSDLVTK(*)EASFYLQNEGER(*)     | K7  | 21.3  | 1000   | 2.75      | -        | -           |           |
| Acaca    | Q5SWU9 | 2134 | DLVK(*)TMR(*)                 | K4  | 10.72 | 1000   | -         | -        | 0.91954023  |           |
| Tmprss13 | Q5U405 | 516  | NK(*)PGVYTK(*)                | K2  | 20.96 | 70.1   | -         | -        | -           |           |
| Dnajc11  | Q5U458 | 45   | LC(+57.02)MLYHPDK(*)HR(*)DPEL | K9  | 8.08  | 34.75  | -         | -        | 1.847826087 |           |
| Utp20    | Q5XG71 | 1855 | VC(+57.02)VLLK(*)NR(*)        | K6  | 52.88 | 1000   | 0.5196078 | 0.807692 | 0.895833    | 0.7410445 |
| Utp20    | Q5XG71 | 2096 | LLHLSLK(*)TSR(*)              | K7  | 39.72 | 1000   | 1.1568627 | 1.025641 | 1.3125      | 1.1650013 |
| Utp20    | Q5XG71 | 278  | TMAK(*)SSVVYIK(*)             | K4  | 27.09 | 150.89 | 1.2549019 | 1.256410 | -           | 1.2556561 |
| Utp20    | Q5XG71 | 1150 | FINPLK(*)NLR(*)               | K6  | 25.89 | 1000   | 0.7647058 | 1.384615 | -           | 1.0746606 |
| Utp20    | Q5XG71 | 1760 | EQEC(+57.02)ISK(*)SVSFLPR(*)  | K7  | 20.02 | 1000   | 1.6372549 | 1.820512 | 1.260416    | 1.5727281 |
| Utp20    | Q5XG71 | 2356 | SLLSK(*)VDR(*)                | K5  | 18.33 | 1000   | -         | 0.923076 | 0.572916    | 0.7479968 |
| Utp20    | Q5XG71 | 2530 | MK(*)SISLASC(+57.02)HQLHSK(*) | K2  | 16    | 144.36 | -         | -        | 0.895833333 |           |
| Utp20    | Q5XG71 | 2351 | MASMAIK(*)SLLSK(*)            | K7  | 14.28 | 47.14  | -         | -        | 0.8125      |           |
| Arcn1    | Q5XJY5 | 263  | TSEATK(*)VHAPPINMESVHMK(*)    | K6  | 51.2  | 56.26  | 1.1052631 | 1.025641 | 0.879120    | 1.0033417 |
| Arcn1    | Q5XJY5 | 44   | LMNTGK(*)QHTEFVETESVR(*)      | K6  | 44.25 | 1000   | 0.8526315 | 0.628205 | 0.901098    | 0.7939785 |
| Arcn1    | Q5XJY5 | 243  | LK(*)SEGETIMSSNMGK(*)         | K2  | 36.18 | 187.28 | 1.1052631 | 0.679487 | 0.956043    | 0.9135981 |
| Sin3a    | Q60520 | 155  | EFK(*)SQSIDTPGVISR(*)         | K3  | 80.31 | 1000   | 0.7410714 | 1.157142 | 0.929411    | 0.942542  |
| Xrcc1    | Q60596 | 171  | VTVTK(*)LGQFR(*)              | K5  | 64.1  | 1000   | 1.0427350 | 0.6875   | 0.58        | 0.7700783 |
| Ogdh     | Q60597 | 74   | SVHK(*)SWDIFFR(*)             | K4  | 32.32 | 1000   | 1.1089108 | -        | 0.548387    | 0.828649  |
| Ogdh     | Q60597 | 907  | LLFC(+57.02)TGK(*)VYYDLTR(*)  | K7  | 26.85 | 1000   | 1.2376237 | -        | 1.010752    | 1.1241882 |
| Ogdh     | Q60597 | 860  | K(*)PLIVFTPK(*)SLLR(*)        | K9  | 19.1  | 135.81 | 1.0891089 | 1.123456 | 0.913978    | 1.0421814 |
| Cttn     | Q60598 | 42   | WGAK(*)TVQGSGHQEHINIHK(*)     | K4  | 73.67 | 106.28 | 0.9183673 | 0.909090 | 0.945652    | 0.9243701 |
| Cttn     | Q60598 | 110  | LSK(*)HC(+57.02)SQVDSVR(*)    | K3  | 67.15 | 1000   | 1.0714285 | 0.870129 | 0.836956    | 0.9261717 |
| Cttn     | Q60598 | 346  | TVPIEAVTSK(*)TSNIR(*)         | K10 | 64.5  | 1000   | 1.0306122 | 1.012987 | 1           | 1.0145331 |
| Cttn     | Q60598 | 208  | VDK(*)SAVGFEYQGK(*)           | K3  | 60.87 | 187.15 | 1.1122448 | 0.909090 | 0.847826    | 0.9563873 |
| Cttn     | Q60598 | 181  | SAVGFDYQGK(*)TEK(*)           | K10 | 58.44 | 32.97  | -         | -        | 0.902173913 |           |

|         |        |      |                                      |     |       |        |           |          |          |           |
|---------|--------|------|--------------------------------------|-----|-------|--------|-----------|----------|----------|-----------|
| Cttn    | Q60598 | 144  | SAVGFEYQGK(*)TEK(*)                  | K10 | 53.26 | 28.96  | 1.3265306 | 1.909090 | 0.978260 | 1.4046275 |
| Cttn    | Q60598 | 295  | LAK(*)HESQQDYAK(*)                   | K3  | 46.21 | 166.66 | 1.0816326 | 0.753246 | 0.869565 | 0.9014815 |
| Cttn    | Q60598 | 107  | SAVGHEYQSK(*)LSK(*)                  | K10 | 40.39 | 24.24  | 1.4285714 | 0.974025 | 0.869565 | 1.0907209 |
| Cttn    | Q60598 | 144  | VDQSAVGFEYQGK(*)TEK(*)               | K13 | 38.89 | 26.52  | 0.6020408 | 0.883116 | 1.271739 | 0.9189656 |
| Myl6    | Q60605 | 56   | VLGNPK(*)SDEMNVK(*)                  | K6  | 98.44 | 136.94 | 0.82      | 0.8      | 0.954545 | 0.8581818 |
| Myl6    | Q60605 | 81   | NK(*)DQGTIEDYVEGLR(*)                | K2  | 97.25 | 1000   | 1.06      | 1.1375   | 1.011363 | 1.0696212 |
| Myl6    | Q60605 | 26   | TGDGK(*)ILYSQC(+57.02)GDVMR(*)       | K5  | 69    | 1000   | 1         | 0.575    | 1.125    | 0.9       |
| Grb2    | Q60631 | 50   | DGFIPK(*)NYIEMK(*)                   | K6  | 49.37 | 60.84  | 0.9126213 | 0.9      | 0.757575 | 0.8567324 |
| Clpb    | Q60649 | 628  | ITVEDSDK(*)HLLK(*)                   | K8  | 29.61 | 82.24  | 2.5192307 | 1.082352 | 0.783132 | 1.4615721 |
| Klra4   | Q60651 | 125  | DQNILC(+57.02)DK(*)TR(*)             | K8  | 43.66 | 1000   | 3.2985074 | -        | -        | -         |
| Hnrnpd  | Q60668 | 153  | ESESVDK(*)VMDQK(*)                   | K7  | 38.55 | 100.21 | -         | -        | 1.860465 | 1.16      |
| Hnrnpd  | Q60668 | 72   | IDASK(*)NEEDEGHSNSSPR(*)             | K5  | 16.06 | 1000   | -         | -        | 2.034883 | 0.721     |
| Hnrnpd  | Q60668 | 251  | YHNVGLSK(*)C(+57.02)EIK(*)           | K8  | 6.9   | 52.86  | 1.6907216 | 1.226666 | 1.523255 | 1.4802147 |
| Chuk    | Q60680 | 466  | MK(*)NTLISASQQLK(*)                  | K2  | 38.51 | 194.28 | -         | 0.969387 | 0.496    | 0.7326939 |
| Psm6    | Q60692 | 66   | VTDK(*)LTPHHDHIFC(+57.02)C(+57.02)K4 | K4  | 79.76 | 1000   | 0.8854166 | 0.858974 | 1.216867 | 0.9870862 |
| Samhd1  | Q60710 | 609  | SLDAAGK(*)HFVQWC(+57.02)ALR(*)       | K7  | 54.99 | 1000   | 1.0543478 | 0.846153 | 1.032258 | 0.9775866 |
| Samhd1  | Q60710 | 378  | IC(+57.02)EVEYK(*)VK(*)              | K7  | 50.69 | 33.18  | 0.9456521 | 0.961538 | 0.795698 | 0.9009632 |
| Samhd1  | Q60710 | 326  | GR(*)PATK(*)SFLYEIVSNK(*)            | K6  | 49.33 | 213.35 | 0.8804347 | -        | 0.784946 | 0.8326905 |
| Samhd1  | Q60710 | 383  | VK(*)EDK(*)TYIR(*)                   | K5  | 46.41 | 91.37  | -         | -        | 0.967741 | 0.1935    |
| Samhd1  | Q60710 | 641  | WNNK(*)TSSC(+57.02)LQEVSK(*)         | K4  | 44.7  | 153.52 | 0.7173913 | 0.576923 | 1.043010 | 0.7791084 |
| P4ha1   | Q60715 | 382  | ISK(*)SAWLSGYEDPVVSR(*)              | K3  | 89.38 | 1000   | 0.9157894 | 0.776315 | 0.977528 | 0.8898778 |
| P4ha1   | Q60715 | 159  | GNLPGVQHK(*)SFLTAEDC(+57.02)F        | K9  | 62.68 | 229.43 | 0.7789473 | -        | 0.966292 | 0.8726198 |
| P4ha1   | Q60715 | 288  | QK(*)YEMLC(+57.02)R(*)               | K2  | 48.99 | 1000   | 1.5368421 | 1.315789 | 1.303370 | 1.3853341 |
| P4ha2   | Q60716 | 385  | VSK(*)SSWLEEDDPVVAR(*)               | K3  | 70.33 | 1000   | -         | 0.698795 | 0.858585 | 0.7786905 |
| P4ha2   | Q60716 | 61   | IK(*)SWASK(*)                        | K2  | 9.56  | 56.94  | -         | 1.361445 | -        | -         |
| Bag1    | Q60739 | 103  | SK(*)NVTGTQVEEVTK(*)                 | K2  | 10.25 | 54.4   | -         | 2.283950 | -        | -         |
| Khdrbs1 | Q60749 | 152  | K(*)DDEENYDLFSHK(*)NMK(*)            | K14 | 73.34 | 56.34  | 1.3085106 | 0.792207 | 1.409638 | 1.170119  |
| Khdrbs1 | Q60749 | 200  | ISVLGK(*)GSMR(*)                     | K6  | 72.71 | 1000   | 0.8723404 | 0.766233 | 1.108433 | 0.9156693 |
| Igf1r   | Q60751 | 503  | FTSTTTWK(*)NR(*)                     | K8  | 33.62 | 1000   | 0.8135593 | 1.092307 | 0.801724 | 0.9025304 |
| Grb10   | Q60760 | 613  | LK(*)HHC(+57.02)IR(*)                | K2  | 65.25 | 1000   | 1.0813953 | -        | 1.068965 | 1.0751804 |
| Irgm1   | Q60766 | 275  | IVGDK(*)VAVWK(*)                     | K5  | 54.79 | 112.56 | 0.9010989 | 0.88     | 0.988235 | 0.9231114 |
| Irgm1   | Q60766 | 289  | IANESLK(*)NSLGVR(*)                  | K7  | 38.19 | 1000   | 0.8351648 | 1.16     | 0.929411 | 0.9748589 |
| Ly75    | Q60767 | 1526 | LIFHVK(*)SSK(*)                      | K6  | 41.48 | 29.32  | 0.6588235 | -        | 0.833333 | 0.7460784 |
| Ly75    | Q60767 | 612  | WEVK(*)NC(+57.02)R(*)                | K4  | 27.87 | 1000   | -         | -        | 1.155555 | 0.556     |

|          |        |     |                                  |     |       |        |           |          |                    |
|----------|--------|-----|----------------------------------|-----|-------|--------|-----------|----------|--------------------|
| Ly75     | Q60767 | 876 | WWVK(*)TSENPIDR(*)               | K4  | 25.67 | 1000   | -         | -        | 0.622222222        |
| Stxbp3   | Q60770 | 19  | IK(*)TAVFDDC(+57.02)R(*)         | K2  | 27.49 | 1000   | -         | 1.670731 | 2.172839;1.9217856 |
| Dvl2     | Q60838 | 58  | YFFK(*)SMDQDFGVVK(*)             | K4  | 21.21 | 58.64  | -         | 1.246376 | -                  |
| Hells    | Q60848 | 58  | LQHLLK(*)SNIYSK(*)               | K7  | 49.44 | 90.32  | 0.9223300 | 0.820224 | 0.790909(0.844488  |
| Hells    | Q60848 | 97  | LTEGK(*)SLVDGNGEK(*)PVMK(*)      | K5  | 12.51 | 48.12  | 1.2330097 | 0.786516 | 0.990909(1.0034786 |
| Serpinb6 | Q60854 | 100 | LF GDK(*)TC(+57.02)DLLASF K(*)   | K5  | 80.46 | 178.24 | 0.9468085 | 0.753246 | 0.956989;0.8856815 |
| Serpinb6 | Q60854 | 193 | VSK(*)NEEK(*)PVQMMFK(*)          | K3  | 70.52 | 79.36  | 0.6914893 | 0.753246 | 0.860215(0.7683171 |
| Serpinb6 | Q60854 | 316 | QGLFLSK(*)VVHK(*)                | K7  | 69.37 | 88.98  | 1.0319148 | 0.675324 | 0.903225(0.8701551 |
| Serpinb6 | Q60854 | 109 | TC(+57.02)DLLASF K(*)DSC(+57.02) | K9  | 53.29 | 51.63  | -         | -        | 0.666666667        |
| Serpinb6 | Q60854 | 309 | ADFSGMSSK(*)QGLFLSK(*)           | K9  | 38.18 | 39.4   | -         | -        | 0.967741935        |
| Serpinb6 | Q60854 | 172 | AIYFK(*)GNWEK(*)                 | K5  | 11.09 | 73.54  | 0.9468085 | 0.805194 | 1 0.9173344        |
| Stip1    | Q60864 | 325 | DAIH FYNK(*)SLAEHR(*)            | K8  | 93.56 | 1000   | 0.9489795 | 0.8      | 1.010869;0.9199497 |
| Stip1    | Q60864 | 246 | ALK(*)HYDR(*)                    | K3  | 87.68 | 1000   | -         | 0.95     | 0.945652;0.9478261 |
| Stip1    | Q60864 | 446 | DYTK(*)AMDVYQK(*)                | K4  | 87.24 | 186.64 | 0.9591836 | 0.85     | 0.956521;0.9219018 |
| Stip1    | Q60864 | 373 | GNEC(+57.02)FQK(*)GDYPQAMK(*)    | K7  | 83.87 | 130.09 | 0.9591836 | 0.675    | 0.945652;0.8599453 |
| Stip1    | Q60864 | 68  | TVDLK(*)PDW GK(*)                | K5  | 83.67 | 69.39  | 0.8061224 | 0.7875   | 0.891304;0.8283089 |
| Stip1    | Q60864 | 317 | YK(*)DAIH FYNK(*)                | K2  | 83.53 | 242.89 | 1.0816326 | 0.9      | 0.934782(0.9721384 |
| Stip1    | Q60864 | 73  | TVDLK(*)PDW GK(*)GYSR(*)         | K10 | 79.4  | 64.28  | 0.8979591 | 0.8375   | 0.978260(0.9045734 |
| Stip1    | Q60864 | 325 | YK(*)DAIH FYNK(*)SLAEHR(*)       | K10 | 79.19 | 180.8  | 0.9693877 | 0.7375   | 0.989130(0.8986727 |
| Stip1    | Q60864 | 100 | TYEEGLK(*)HEANNLQLK(*)           | K7  | 69.15 | 97.64  | 1.7551020 | 0.45     | 0.978260(1.061121  |
| Stip1    | Q60864 | 169 | ELIEQLQNK(*)PSDLG TK(*)LQDPR(*)  | K16 | 59.95 | 81.81  | 0.7448979 | 0.475    | 0.956521;0.7254732 |
| Stip1    | Q60864 | 381 | GDYPQAMK(*)HYTEAIK(*)            | K8  | 51.39 | 100.91 | 1         | 0.85     | 0.815217;0.8884058 |
| Stip1    | Q60864 | 100 | R(*)TYEEGLK(*)HEANNLQLK(*)       | K8  | 25.27 | 74.73  | -         | -        | 0.923913043        |
| Caprin1  | Q60865 | 145 | LK(*)TVLELQYVLDK(*)              | K2  | 14.7  | 212.2  | -         | -        | 1.511627907        |
| Pter     | Q60866 | 90  | AK(*)GGGALVENTTTGLSR(*)          | K2  | 84.92 | 1000   | 1.1547619 | 0.702127 | 0.925531(0.9274738 |
| Pter     | Q60866 | 302 | ILMAHDIHTK(*)HR(*)               | K10 | 65.22 | 1000   | 1         | -        | 1.010638;1.0053191 |
| Reep5    | Q60870 | 25  | LEAK(*)TGVNR(*)                  | K4  | 84.2  | 1000   | 0.6134453 | 0.890410 | 0.868131(0.7906627 |
| Reep5    | Q60870 | 12  | FLHEK(*)NC(+57.02)MTDLLAK(*)     | K5  | 78    | 130.84 | 0.6806722 | 0.780821 | 0.989010(0.8168351 |
| Arhgef2  | Q60875 | 483 | LIHEGC(+57.02)LLWK(*)TATGR(*)    | K10 | 42.59 | 1000   | 0.5384615 | 0.486842 | 1.056818;0.6940406 |
| Arhgef2  | Q60875 | 601 | LQQK(*)NQALVELLQK(*)             | K4  | 42.53 | 207.31 | 0.9450549 | 0.776315 | 1.045454(0.9222751 |
| Vdac2    | Q60930 | 75  | YK(*)WC(+57.02)EYGLTFTEK(*)      | K2  | 84.04 | 215.31 | 0.9387755 | 0.888888 | 0.967391;0.9316852 |
| Vdac2    | Q60930 | 32  | DIFNK(*)GFGFGLVK(*)              | K5  | 70.17 | 216.51 | 0.9693877 | -        | 0.858695(0.9140417 |
| Vdac2    | Q60930 | 40  | GFGFGLVK(*)LDVK(*)               | K8  | 14.63 | 55.36  | -         | -        | 1.293478261        |
| Vdac2    | Q60930 | 278 | LTLSALVDGK(*)SFNAGG HK(*)        | K10 | 7.94  | 26.99  | -         | 1.283950 | -                  |

|         |        |      |                                |     |       |        |           |          |          |           |
|---------|--------|------|--------------------------------|-----|-------|--------|-----------|----------|----------|-----------|
| Vdac3   | Q60931 | 63   | YK(*)VC(+57.02)NYGLTFTQK(*)    | K2  | 90.78 | 272.66 | 0.98      | 0.927710 | 0.905263 | 0.937658  |
| Vdac3   | Q60931 | 20   | DVFNK(*)GYGFGMVK(*)            | K5  | 86.15 | 189.04 | 0.8       | 0.734939 | 0.873684 | 0.8028747 |
| Vdac3   | Q60931 | 34   | TK(*)SC(+57.02)SGVEFSTSGHAYTDT | K2  | 84.34 | 169.46 | 0.92      | 0.722891 | 1.010526 | 0.8844726 |
| Vdac3   | Q60931 | 28   | GYGFGMVK(*)IDLK(*)             | K8  | 78.84 | 88.98  | 0.96      | 0.771084 | 0.936842 | 0.8893088 |
| Vdac3   | Q60931 | 12   | C(+99.03)NTPTYC(+57.02)DLGK(*) | K11 | 69.39 | 20.7   | -         | 0.734939 | 0.8      | 0.7674699 |
| Vdac3   | Q60931 | 163  | SK(*)LSQNNFALGYK(*)            | K2  | 57.07 | 267.5  | 0.47      | 0.530120 | 0.863157 | 0.6210928 |
| Vdac3   | Q60931 | 266  | LTLALIDGK(*)NFNAGGHK(*)        | K10 | 31.91 | 35.1   | 1.15      | -        | 0.947368 | 1.0486842 |
| Vdac1   | Q60932 | 33   | DVFTK(*)GYGFGLIK(*)            | K5  | 88.88 | 161.77 | 0.9895833 | 0.783132 | 0.945054 | 0.9059236 |
| Vdac1   | Q60932 | 25   | A(+42.01)VPPTYADLGK(*)SAR(*)   | K11 | 53.58 | 1000   | 1         | 1.566265 | 0.912087 | 1.159451  |
| Vdac1   | Q60932 | 279  | LTLALLDGK(*)NVNAGGHK(*)        | K10 | 46.73 | 30.66  | 0.9791666 | 1.096385 | 0.725274 | 0.933609  |
| Vdac1   | Q60932 | 41   | GYGFGLIK(*)LDLK(*)             | K8  | 14.35 | 77.13  | -         | -        | 1.373626 | 374       |
| Pml     | Q60953 | 660  | SVYSK(*)AVSLEAGLR(*)           | K5  | 52.15 | 1000   | -         | 0.873417 | -        |           |
| Rbbp7   | Q60973 | 119  | IEC(+57.02)EIK(*)INHEGEVNR(*)  | K6  | 87.89 | 1000   | 1.1098901 | 1        | 1.054945 | 1.0549451 |
| Rbbp7   | Q60973 | 4    | A(+42.01)SK(*)EMFEDTVEER(*)    | K3  | 49    | 1000   | 0.9120879 | -        | 0.626373 | 0.7692308 |
| Rbbp7   | Q60973 | 295  | ILATGSADK(*)TVALWDLR(*)        | K9  | 17.29 | 1000   | -         | -        | 1.065934 | 066       |
| Ncor1   | Q60974 | 1347 | GK(*)PYDGITTIK(*)              | K2  | 76.74 | 77.76  | -         | 0.970588 | 0.802197 | 0.886393  |
| Ppp2r5c | Q60996 | 192  | IYGK(*)FLGLR(*)                | K4  | 68.82 | 1000   | 0.9560439 | 1.04     | 0.858695 | 0.9515799 |
| Ppp2r5c | Q60996 | 183  | DFLK(*)TTLHR(*)                | K4  | 41.77 | 1000   | 1.3516483 | -        | 0.923913 | 1.1377807 |
| Asns    | Q61024 | 168  | GLVSLK(*)HSTTPFLK(*)           | K6  | 84.59 | 197.82 | 0.9550561 | 0.769230 | 0.902173 | 0.875487  |
| Asns    | Q61024 | 478  | EAFSDGITSVK(*)NSWFK(*)         | K11 | 81.04 | 65.44  | 0.9438202 | -        | 0.934782 | 0.9393014 |
| Asns    | Q61024 | 445  | NGIEK(*)HLLR(*)                | K5  | 77.63 | 1000   | 1.0112359 | 0.871794 | 0.967391 | 0.9501407 |
| Asns    | Q61024 | 556  | TLTHYK(*)SAAK(*)               | K6  | 76.92 | 77.13  | 0.8651685 | -        | -        |           |
| Asns    | Q61024 | 232  | LFPGFDETVK(*)NNLR(*)           | K11 | 67.52 | 1000   | 0.8539325 | -        | 0.902173 | 0.8780532 |
| Asns    | Q61024 | 513  | TK(*)EGYFYR(*)                 | K2  | 17.21 | 1000   | 1.0674157 | 0.846153 | 1.010869 | 0.974813  |
| Ncoa2   | Q61026 | 640  | GQTK(*)LLQLLTTK(*)             | K4  | 59.07 | 193.63 | 0.3445378 | -        | 0.062027 | 0.2032825 |
| Ncoa2   | Q61026 | 780  | TDPASNTK(*)LIAMK(*)            | K8  | 58.44 | 95.62  | 0.2436974 | -        | 0.040090 | 0.1418941 |
| Ncoa2   | Q61026 | 780  | TDPASNTK(*)LIAMK(*)TVK(*)      | K8  | 56.67 | 150.63 | 0.1484593 | -        | 0.031770 | 0.0901147 |
| Ncoa2   | Q61026 | 785  | TDPASNTK(*)LIAM(+15.99)K(*)TVK | K13 | 26.92 | 20.7   | 0.1820728 | -        | 0.012102 | 0.0970879 |
| Ncoa2   | Q61026 | 785  | PASNTK(*)LIAMK(*)TVK(*)        | K11 | 19.15 | 32.97  | 0.1512605 | -        | -        |           |
| Ncoa2   | Q61026 | 780  | PASNTK(*)LIAMK(*)TVK(*)        | K6  | 19.15 | 132.61 | 0.1512605 | -        | -        |           |
| Tmpo    | Q61029 | 302  | LTGNFK(*)HASSILPITEFSDITR(*)   | K6  | 57.11 | 1000   | 0.7291666 | 0.8875   | 0.840909 | 0.8191919 |
| Tmpo    | Q61029 | 302  | FK(*)HASSILPITEFSDITR(*)       | K2  | 19.4  | 1000   | -         | -        | 1.386363 | 636       |
| Tmpo    | Q61033 | 562  | AATQASSTESC(+57.02)DK(*)HLDLAI | K13 | 57.22 | 1000   | -         | 0.944444 | 0.941860 | 0.9431525 |
| Tmpo    | Q61033 | 460  | SSFAK(*)SVVSHSLTLGVEVSK(*)PPP  | K5  | 53.89 | 80.24  | 0.7011494 | -        | 0.860465 | 0.7808073 |



|          |        |     |                                 |     |       |        |           |          |          |           |
|----------|--------|-----|---------------------------------|-----|-------|--------|-----------|----------|----------|-----------|
| Tmpo     | Q61033 | 17  | LK(*)SELVANNVTLPAGEQR(*)        | K2  | 34.38 | 1000   | -         | 1.111111 | 1.127906 | 1.119509  |
| Hars     | Q61035 | 243 | LDK(*)VSWEEVK(*)                | K3  | 59.19 | 104.64 | 0.9339622 | 1        | 1.054347 | 0.9961034 |
| Hars     | Q61035 | 373 | YDGLVGMFDPK(*)GR(*)             | K11 | 38.61 | 1000   | 0.8773584 | 1.166666 | 0.467391 | 0.8371388 |
| Hars     | Q61035 | 250 | VSWEEVK(*)NEMVGEK(*)            | K7  | 33.57 | 122.76 | 0.9150943 | -        | 0.532608 | 0.7238515 |
| Ppm1g    | Q61074 | 380 | NAGGK(*)VTMDGR(*)               | K5  | 98.73 | 1000   | 0.8584905 | 0.784946 | 0.887755 | 0.8437306 |
| Ppm1g    | Q61074 | 336 | GK(*)QLIVANAGDSR(*)             | K2  | 53.22 | 1000   | 0.8018867 | 0.516129 | 0.418367 | 0.5787944 |
| Ppm1g    | Q61074 | 172 | VPPHTK(*)SGIGTGDEPGPQGLNGEA     | K6  | 26.52 | 1000   | 0.8867924 | -        | -        | -         |
| Cdc37    | Q61081 | 243 | IK(*)TADHQYMEGFK(*)             | K2  | 84.7  | 215.31 | 1.0645161 | 0.925    | 1.021276 | 1.0035976 |
| Cdc37    | Q61081 | 161 | QIK(*)HFGMLHR(*)                | K3  | 79.42 | 1000   | 0.9354838 | 0.8375   | 0.989361 | 0.9207819 |
| Cdc37    | Q61081 | 111 | EK(*)NMPWNVDTLISK(*)            | K2  | 65.69 | 194.69 | 0.6451612 | 0.825    | 0.882978 | 0.78438   |
| Cdc37    | Q61081 | 127 | DGFSK(*)SMVNTK(*)PEK(*)         | K5  | 56.1  | 156.85 | 1.0537634 | 0.55     | 0.765957 | 0.789907  |
| Cdc37    | Q61081 | 241 | QFFTK(*)IK(*)                   | K5  | 54.09 | 27.16  | 1.3333333 | 1.625    | 1.010638 | 1.3229905 |
| Abcb7    | Q61102 | 511 | VAIVGGSGSGK(*)STIVR(*)          | K11 | 31.48 | 1000   | -         | 1.2      | 0.696969 | 0.9484848 |
| Ppp2r5e  | Q61151 | 200 | DYLK(*)TVLHR(*)                 | K4  | 17.16 | 1000   | -         | 1.125    | 1.465116 | 1.2950581 |
| Ctcf     | Q61164 | 429 | MHILQK(*)HTENVAK(*)             | K6  | 32.34 | 86.63  | 0.5106382 | 1.068965 | 1        | 0.8598679 |
| Ctcf     | Q61164 | 496 | FK(*)C(+57.02)DQC(+57.02)DYAC(+ | K2  | 26.7  | 1000   | -         | 1.011494 | -        | -         |
| Prdx2    | Q61171 | 135 | GLFIIDAK(*)GVLR(*)              | K8  | 61.04 | 1000   | 0.9473684 | -        | 1.172043 | 1.0597057 |
| Prdx2    | Q61171 | 119 | SLSQNYGVVK(*)NDEGIAYR(*)        | K10 | 49.63 | 1000   | 0.5052631 | 0.922077 | 1.118279 | 0.8485402 |
| Prdx2    | Q61171 | 119 | YGVVK(*)NDEGIAYR(*)             | K5  | 19.52 | 1000   | 2.4105263 | 4.545454 | 1.354838 | 2.7702732 |
| Papola   | Q61183 | 635 | PSGNTATK(*)VPNPIGVVK(*)         | K8  | 85.95 | 66.16  | 0.9354838 | 0.654761 | 0.826086 | 0.8054442 |
| Tsg101   | Q61187 | 362 | GVIDLDVFLK(*)HVR(*)             | K10 | 45.39 | 1000   | 1.2637362 | -        | 1.084337 | 1.1740368 |
| Hcfc1    | Q61191 | 217 | SK(*)LVIYGGMSGC(+57.02)R(*)     | K2  | 13.08 | 1000   | -         | 3.358974 | 3.047058 | 3.2030166 |
| Pafah1b2 | Q61206 | 86  | LK(*)NGELENIK(*)PK(*)           | K2  | 58.29 | 242.89 | 0.9780219 | 0.910447 | 0.818181 | 0.9022172 |
| Pafah1b2 | Q61206 | 155 | NAK(*)VNQLLK(*)                 | K3  | 9.43  | 85.52  | 1.0549450 | 1.089552 | 1.022727 | 1.0557415 |
| Psap     | Q61207 | 37  | DVK(*)TAVDC(+57.02)GAVK(*)      | K3  | 47.97 | 77.76  | -         | -        | 1.157303 | 371       |
| Dyrk1a   | Q61214 | 105 | TYK(*)HINEVYAK(*)               | K3  | 43.32 | 138.5  | 0.7083333 | -        | -        | -         |
| Dyrk1a   | Q61214 | 212 | LLELMNK(*)HDTEMK(*)             | K7  | 38.65 | 62.39  | -         | -        | 1.411764 | 706       |
| Sntb2    | Q61235 | 307 | EVK(*)HIAWLAEQAK(*)             | K3  | 48.96 | 154.29 | 0.7857142 | 0.569444 | 0.791666 | 0.7156085 |
| Sntb2    | Q61235 | 9   | ATK(*)AGLVELLLR(*)              | K3  | 39.28 | 1000   | -         | -        | 1.486111 | 1111      |
| Igbp1    | Q61249 | 177 | LSALK(*)SAVESGQADDER(*)         | K5  | 61.65 | 1000   | 1.2625    | 0.808219 | 0.789473 | 0.9533976 |
| Igbp1    | Q61249 | 42  | TIQDK(*)VSK(*)                  | K5  | 41.74 | 47.36  | -         | -        | 1.042105 | 263       |
| Tcf12    | Q61286 | 151 | QDLGLGSPAQLSSSGK(*)PGTPYYSFS    | K16 | 14.97 | 1000   | -         | -        | 2.085365 | 854       |
| Hspa4    | Q61316 | 53  | SIGAAAK(*)SQVISNAK(*)           | K7  | 95.15 | 192.66 | 0.9473684 | 0.8125   | 0.966666 | 0.908845  |
| Hspa4    | Q61316 | 430 | SK(*)VLTIFYR(*)                 | K2  | 94.79 | 1000   | 0.9473684 | 0.8625   | 0.944444 | 0.9181043 |



|         |        |      |                                 |     |       |        |           |          |           |           |
|---------|--------|------|---------------------------------|-----|-------|--------|-----------|----------|-----------|-----------|
| Hspa4   | Q61316 | 61   | SQVISNAK(*)NTVQGFK(*)           | K8  | 91.35 | 148.49 | 0.9473684 | 0.8      | 0.9777777 | 0.9083821 |
| Hspa4   | Q61316 | 44   | C(+57.02)TPAC(+57.02)VSFGPK(*)  | K11 | 73.88 | 1000   | 0.8       | 0.8625   | 0.8777777 | 0.8467593 |
| Hspa4   | Q61316 | 221  | LK(*)VLATAFDTTLGGR(*)           | K2  | 68.44 | 1000   | 1.2       | 0.7125   | 1.0555555 | 0.9893519 |
| Hspa4   | Q61316 | 720  | NK(*)EDQYEHLDAADVTK(*)          | K2  | 65.08 | 116.09 | 1.2210526 | 0.6625   | 0.9       | 0.9278509 |
| Hspa4   | Q61316 | 388  | GC(+57.02)ALQC(+57.02)AILSPAFK  | K14 | 60.81 | 1000   | 0.9157894 | 0.6125   | 1.0222222 | 0.8501706 |
| Hspa4   | Q61316 | 185  | GIYK(*)QDLPALEEK(*)PR(*)        | K4  | 48.29 | 110.9  | 0.9052631 | 0.6625   | 0.9777777 | 0.8485136 |
| Hspa4   | Q61316 | 737  | VEK(*)STNEAMEWMNSK(*)           | K3  | 44.41 | 264.82 | 0.6210526 | 0.7625   | 1.1444444 | 0.8426657 |
| Hspa4   | Q61316 | 680  | LAELK(*)SLGQPIK(*)              | K5  | 38.58 | 93.6   | -         | -        | 0.7666666 | 0.7666667 |
| Hspa4   | Q61316 | 619  | NDAK(*)NAVEEYVYEMR(*)           | K4  | 10.59 | 1000   | -         | -        | 1.0222222 | 1.0222222 |
| Hspa4   | Q61316 | 718  | VISSFK(*)NK(*)                  | K6  | 7.66  | 27.16  | -         | 1.4      | -         | -         |
| Hadh    | Q61425 | 127  | LK(*)NELFQR(*)                  | K2  | 93.92 | 1000   | 0.8380952 | 0.673913 | 0.825688  | 0.7792321 |
| Znf638  | Q61464 | 1454 | SK(*)PTQIGVNR(*)                | K2  | 56.34 | 1000   | 1.1046511 | 0.816901 | 0.9787234 | 0.9667587 |
| Znf638  | Q61464 | 876  | ATGK(*)SAEESPSGTLEATEK(*)EPVnk  | K4  | 54.71 | 124.59 | 0.8953488 | -        | 0.819148  | 0.8572489 |
| Znf638  | Q61464 | 794  | TMETVSSSSSAK(*)SGQIK(*)         | K12 | 54.55 | 68.6   | 0.7558139 | 0.605633 | 0.776595  | 0.7126812 |
| Znf638  | Q61464 | 628  | SLSSVK(*)SDSHLGAYSAAHK(*)       | K6  | 29.77 | 40.94  | 1.2790697 | 0.971830 | 0.957446  | 1.0694492 |
| Znf638  | Q61464 | 876  | ATGK(*)SAEESPSGTLEATEK(*)       | K4  | 16.46 | 148.55 | -         | -        | 1.9148936 | 1.9148936 |
| Smarcd1 | Q61466 | 498  | YFYSK(*)VQQR(*)                 | K5  | 14.96 | 1000   | 0.5131578 | 0.974358 | 0.776     | 0.7545056 |
| Glg1    | Q61543 | 512  | ALNEAC(+57.02)ESVIQTAC(+57.02)  | K15 | 78.53 | 1000   | 0.83      | 0.813333 | 0.918604  | 0.8539793 |
| Glg1    | Q61543 | 370  | VSYSIAK(*)SC(+57.02)K(*)        | K7  | 52.34 | 25.67  | 0.93      | 0.813333 | 0.918604  | 0.8873127 |
| Glg1    | Q61543 | 124  | VC(+57.02)PK(*)HTWSNNLAVLEC(+   | K4  | 51.27 | 1000   | -         | -        | 1.0813953 | 1.0813953 |
| Glg1    | Q61543 | 1072 | ADIFVDPVLHTAC(+57.02)ALDIK(*)   | K18 | 44.39 | 1000   | 0.86      | 1.253333 | 0.825581  | 0.9796382 |
| Glg1    | Q61543 | 1038 | IK(*)TELC(+57.02)K(*)           | K2  | 28.64 | 105.53 | 0.27      | -        | -         | -         |
| Ewsr1   | Q61545 | 438  | DFQGSK(*)LK(*)                  | K6  | 39.74 | 30.83  | -         | 1.140845 | 1.044943  | 1.0928944 |
| Rad21   | Q61550 | 577  | ALAK(*)TGAESISLLELC(+57.02)R(*) | K4  | 30.83 | 1000   | 0.8686868 | 1.1875   | 0.838709  | 0.9649655 |
| Fscn1   | Q61553 | 471  | YLK(*)GDHAGVLK(*)               | K3  | 50.25 | 150.63 | -         | 0.915662 | 0.969387  | 0.9425252 |
| Fscn1   | Q61553 | 220  | SGK(*)VAFR(*)                   | K3  | 16.66 | 1000   | 1.1020408 | 0.867469 | 1.040816  | 1.0034423 |
| Fdxr    | Q61578 | 224  | VK(*)TVWIVGR(*)                 | K2  | 34.31 | 1000   | -         | 0.553030 | 1.621212  | 1.0871212 |
| Fxr1    | Q61584 | 207  | NEEATK(*)HLEC(+57.02)TK(*)      | K6  | 52.62 | 102.87 | 1.0574712 | 0.530864 | 0.907216  | 0.8318507 |
| Fxr1    | Q61584 | 310  | VIQEIVDK(*)SGVVR(*)             | K8  | 36.47 | 1000   | -         | 0.950617 | 0.845360  | 0.8979891 |
| Fxr1    | Q61584 | 83   | ANDQEPC(+57.02)GWWLAK(*)VR(*)   | K13 | 18.7  | 1000   | 0.9080459 | 1.296296 | 0.701030  | 0.9684577 |
| Ktn1    | Q61595 | 875  | GK(*)EEQVNSMK(*)                | K2  | 61.27 | 183.32 | 0.8571428 | 0.649350 | 0.872340  | 0.7929446 |
| Ktn1    | Q61595 | 1116 | YK(*)SVLAETEGILQK(*)            | K2  | 27.55 | 220.17 | 0.6632653 | -        | 1.340425  | 1.0018454 |
| Ktn1    | Q61595 | 288  | FK(*)DFLLSLK(*)                 | K2  | 13.75 | 136.94 | 1.6836734 | -        | -         | -         |
| Ktn1    | Q61595 | 203  | EQDVLLSHQDTK(*)QEGGLGK(*)       | K12 | 10.55 | 34.75  | 1.5510204 | -        | 1.351063  | 1.4510421 |

|        |        |     |                                          |     |       |        |           |          |           |           |
|--------|--------|-----|------------------------------------------|-----|-------|--------|-----------|----------|-----------|-----------|
| Gdi2   | Q61598 | 269 | VVGVK(*)SEGEIAR(*)                       | K5  | 86.25 | 1000   | 0.7857142 | 0.75     | 0.9222222 | 0.8193122 |
| Gdi2   | Q61598 | 309 | VIC(+57.02)ILSHPIK(*)NTNDANSC(+57.02)K10 | K10 | 60.24 | 1000   | 1         | -        | 0.7222222 | 0.8611111 |
| Gdi2   | Q61598 | 278 | C(+57.02)K(*)QLIC(+57.02)DPSYVK          | K2  | 40.11 | 150.82 | -         | -        | 1         |           |
| Gli3   | Q61602 | 564 | LENLK(*)THLR(*)                          | K5  | 5.9   | 1000   | -         | -        | -         |           |
| Ddx19a | Q61655 | 445 | GLAVNMVDSK(*)HSMNILNR(*)                 | K10 | 56.68 | 1000   | 1.0526315 | 0.789473 | 1.032608  | 0.958238  |
| Ddx19a | Q61655 | 91  | DPSSPLYSVK(*)SFEELR(*)                   | K10 | 18.87 | 1000   | -         | -        | 1.630434  | 0.783     |
| Ddx5   | Q61656 | 343 | ENK(*)TIVFVETK(*)                        | K3  | 90.37 | 150.77 | 0.7872340 | 0.707317 | 0.894736  | 0.7964293 |
| Ddx5   | Q61656 | 56  | FEK(*)NFYQEHDLAR(*)                      | K3  | 73.98 | 1000   | 0.8617021 | 1.219512 | 0.905263  | 0.9954925 |
| Ddx5   | Q61656 | 197 | LK(*)STC(+57.02)IYGGAPK(*)               | K2  | 68.17 | 229.18 | 0.8510638 | 0.951219 | 0.957894  | 0.9200594 |
| Ddx5   | Q61656 | 388 | DWVLNEFK(*)HGK(*)                        | K8  | 65.14 | 42.6   | 0.8510638 | 0.743902 | 0.957894  | 0.8509537 |
| Ddx5   | Q61656 | 236 | LIDFLEC(+57.02)GK(*)TNLR(*)              | K9  | 63.99 | 1000   | 1.2127659 | 0.939024 | 0.989473  | 1.047088  |
| Ddx5   | Q61656 | 375 | DGWPAMGIHGDK(*)SQQER(*)                  | K12 | 55.53 | 1000   | 0.7553191 | -        | -         |           |
| Cbx5   | Q61686 | 42  | WK(*)GFSEEHNTWEPEK(*)                    | K2  | 59.97 | 86.39  | 0.7142857 | -        | 1.011363  | 0.8628247 |
| Cbx5   | Q61686 | 102 | SSFNSADDIK(*)SK(*)                       | K11 | 38.93 | 22.87  | -         | 1.769230 | 1.238636  | 1.5039336 |
| Atrx   | Q61687 | 197 | VLIC(+57.02)K(*)NC(+57.02)FK(*)          | K5  | 75.14 | 40.19  | 1.6086956 | 0.92     | 1.370786  | 1.2998274 |
| Atrx   | Q61687 | 778 | GK(*)STETSISK(*)                         | K2  | 49.06 | 128.64 | 1.2065217 | 0.906666 | 1.404494  | 1.1725609 |
| Hspa1a | Q61696 | 328 | MDK(*)AQIHDLVLVGGSTR(*)                  | K3  | 27.29 | 1000   | -         | -        | -         |           |
| Hsph1  | Q61699 | 430 | SK(*)VLTFRL(*)                           | K2  | 83.62 | 1000   | 0.9684210 | 0.921052 | 0.931818  | 0.9404306 |
| Hsph1  | Q61699 | 249 | LVEHFC(+57.02)AEFK(*)TK(*)               | K10 | 72.23 | 39.76  | 0.9157894 | 0.763157 | 1.079545  | 0.9194976 |
| Hsph1  | Q61699 | 53  | TIGVAAK(*)NQQITHANNTVSSFK(*)             | K7  | 60.39 | 69.91  | 0.8947368 | 0.921052 | 1.5       | 1.1052632 |
| Hsph1  | Q61699 | 221 | LK(*)VLGTAFDPFLGGK(*)                    | K2  | 29.24 | 216.84 | 0.6947368 | -        | 1.045454  | 0.8700957 |
| Itih3  | Q61704 | 123 | AVSQGK(*)TAGLVK(*)                       | K6  | 23.15 | 102.87 | 0         | 0.047619 | 0         | 0.015873  |
| Mrps31 | Q61733 | 358 | QK(*)VEHIEWFR(*)                         | K2  | 13.84 | 1000   | -         | 2.105769 | 0.733333  | 1.4195513 |
| Mrps31 | Q61733 | 163 | QTTK(*)SELLR(*)                          | K4  | 13.23 | 1000   | 1.5641025 | 0.990384 | 1.222222  | 1.2589031 |
| Phgdh  | Q61753 | 58  | SATK(*)VTADVINAEEK(*)                    | K4  | 97.27 | 257.85 | 0.9565217 | 0.873417 | 0.955056  | 0.9283319 |
| Phgdh  | Q61753 | 310 | GK(*)SLTGVVNAQALTSFSPHTK(*)              | K2  | 20.4  | 230.38 | -         | -        | 2.325842  | 0.697     |
| Kif5b  | Q61768 | 690 | EHLNK(*)VQTANEVK(*)                      | K5  | 40.43 | 161.77 | 0.8265306 | 1.594936 | 0.905263  | 1.1089102 |
| Kif5b  | Q61768 | 240 | VSK(*)TGAEGAVLDEAK(*)                    | K3  | 38.92 | 170.17 | 0.8571428 | 1.075949 | 0.747368  | 0.8934869 |
| Kif5b  | Q61768 | 602 | SEVK(*)TMVK(*)                           | K4  | 38.17 | 61.77  | -         | -        | 0.768421  | 0.53      |
| Kif5b  | Q61768 | 450 | LK(*)TQMLDQEELLASTR(*)                   | K2  | 20.41 | 1000   | -         | -        | 0.673684  | 0.211     |
| Kif5b  | Q61768 | 644 | IK(*)SLTEYLQNVEQK(*)                     | K2  | 18.1  | 150.01 | 1.5714285 | -        | 1.315789  | 1.443609  |
| Lasp1  | Q61792 | 27  | YWHK(*)AC(+57.02)FHC(+57.02)ET           | K4  | 64.95 | 159.26 | 0.8854166 | 0.974025 | 1.057471  | 0.9723046 |
| Lasp1  | Q61792 | 23  | VNC(+57.02)LDK(*)YWHK(*)                 | K6  | 56.63 | 76.73  | 1.2083333 | 1.220779 | 1.241379  | 1.2234973 |
| Lasp1  | Q61792 | 96  | GK(*)GFSVVADTPELQR(*)                    | K2  | 43.15 | 1000   | -         | 0.519480 | 1.103448  | 0.8114644 |

|       |        |      |                                |     |       |        |           |          |                    |
|-------|--------|------|--------------------------------|-----|-------|--------|-----------|----------|--------------------|
| Rai1  | Q61818 | 449  | GVK(*)NLVSR(*)                 | K3  | 74.8  | 1000   | -         | 0.114213 | -                  |
| Rai1  | Q61818 | 1079 | AAFK(*)SGK(*)R(*)              | K7  | 43.65 | 1000   | -         | 0.137055 | -                  |
| Rai1  | Q61818 | 1076 | AAFK(*)SGK(*)R(*)              | K4  | 43.65 | 1000   | -         | 0.137055 | -                  |
| Rai1  | Q61818 | 1076 | AAFK(*)SGK(*)                  | K4  | 20.58 | 34.94  | -         | 0.197969 | -                  |
| Pdcd4 | Q61823 | 392  | SLWK(*)SSTITIDQMK(*)           | K4  | 22.44 | 71.03  | 1.6091954 | 1.587301 | 1.5324671.5763215  |
| Pdcd4 | Q61823 | 297  | AALDK(*)ATVLLSMSK(*)           | K5  | 17.98 | 137.04 | 0.8735632 | -        | 0.87012910.8718465 |
| Foxc2 | Q61850 | 213  | VVVK(*)SEAASPALPVITK(*)        | K4  | 4.01  | 87.85  | -         | -        | -                  |
| Myh10 | Q61879 | 767  | IGQSK(*)IFFR(*)                | K5  | 89.84 | 1000   | 1.01      | 1.0375   | 0.9787231.0087411  |
| Myh10 | Q61879 | 1188 | ALEDETK(*)NHEAQIQDMR(*)        | K7  | 88.32 | 1000   | 1.05      | 0.8125   | 0.93617010.9328901 |
| Myh10 | Q61879 | 1925 | EVSTLK(*)NR(*)                 | K6  | 76.93 | 1000   | 1.07      | 1.4625   | 1.0106381.1810461  |
| Myh10 | Q61879 | 1809 | LQLEGAVK(*)JSK(*)              | K9  | 74.81 | 36.05  | 0.86      | 0.75     | 0.78723410.799078  |
| Myh10 | Q61879 | 1724 | HAEQER(*)DELADEIANSASGK(*)SAL  | K20 | 60.51 | 34.75  | 0.55      | -        | 1.06382910.8069149 |
| Myh10 | Q61879 | 1106 | GDDETLHK(*)NNALK(*)            | K8  | 60.28 | 105.53 | 1.11      | 1.0875   | 0.8404251.0126418  |
| Myh10 | Q61879 | 663  | ESLTK(*)LMATLR(*)              | K5  | 54.55 | 1000   | 0.82      | 1.1375   | 0.93617010.9645567 |
| Myh10 | Q61879 | 1520 | ADMEDLMSSK(*)DDVGK(*)          | K10 | 47.52 | 46.62  | -         | -        | 1.127659574        |
| Myh10 | Q61879 | 870  | QTK(*)VEGELEEMER(*)            | K3  | 42.37 | 1000   | -         | -        | 0.64893617         |
| Myh10 | Q61879 | 1241 | ELAC(+57.02)EVK(*)VLQQVK(*)    | K7  | 40.18 | 97.87  | 0.72      | 1.0125   | 0.64893610.7938121 |
| Myh10 | Q61879 | 547  | ATDK(*)TFVEK(*)                | K4  | 35.98 | 83.98  | 0.85      | -        | 0.96808510.9090426 |
| Myh10 | Q61879 | 840  | VFTK(*)VK(*)PLLQVTR(*)         | K4  | 31.36 | 80     | 0.7       | 1.475    | 0.65957410.9448582 |
| Myh10 | Q61879 | 414  | AQTK(*)EQADFAVEALAK(*)         | K4  | 30.37 | 191.08 | -         | 1.8125   | -                  |
| Myh10 | Q61879 | 1345 | QLEEEK(*)NSLQEQQEEEEEAR(*)K(*) | K6  | 27.78 | 24.79  | -         | -        | 0.829787234        |
| Myh10 | Q61879 | 1031 | NK(*)QEVMSIDLEER(*)            | K2  | 23.81 | 1000   | 1.12      | -        | 0.8829781.0014894  |
| Myh10 | Q61879 | 1525 | DDVGK(*)NVHELEK(*)             | K5  | 19.89 | 93.15  | 1.51      | -        | -                  |
| Myh10 | Q61879 | 203  | VIQYLAHVASSHK(*)GR(*)          | K13 | 14.32 | 1000   | 1.85      | -        | 2.1489361.9994681  |
| Npm1  | Q61937 | 150  | SAPGGGNK(*)VPQK(*)             | K8  | 98.59 | 76.73  | 0.8367346 | 0.875    | 0.83870910.8501481 |
| Npm1  | Q61937 | 32   | DYHFK(*)VDNDENEHQLSLR(*)       | K5  | 81.33 | 1000   | 1.0714285 | 0.975    | 1.0430101.0298131  |
| Npm1  | Q61937 | 32   | ADK(*)DYHFK(*)VDNDENEHQLSLR(*) | K8  | 80.12 | 127.18 | 1.1326530 | 1.0375   | 0.70967710.9599435 |
| Npm1  | Q61937 | 261  | GGSLPK(*)VEAK(*)               | K6  | 78.07 | 64.53  | 0.8367346 | -        | 0.92473110.8807329 |
| Npm1  | Q61937 | 271  | FINYVK(*)NC(+57.02)FR(*)       | K6  | 73.41 | 1000   | 0.8877551 | 1.05     | 1.04301010.9935886 |
| Npm1  | Q61937 | 32   | FK(*)VDNDENEHQLSLR(*)          | K2  | 52.45 | 1000   | 0.9489795 | 0.95     | 0.89247310.9304842 |
| Npm1  | Q61937 | 265  | VEAK(*)FINYVK(*)               | K4  | 48.24 | 95.35  | 1         | 0.7625   | -0.88125           |
| Npm1  | Q61937 | 271  | INYVK(*)NC(+57.02)FR(*)        | K5  | 28.69 | 1000   | 0.6428571 | -        | 0.61290310.6278802 |
| Npm1  | Q61937 | 150  | SAPGGGNK(*)VPQK(*)K(*)         | K8  | 12.67 | 87.95  | -         | -        | 0.838709677        |
| Pcbp2 | Q61990 | 181  | GVTIPYR(*)PK(*)PSSSPVIFAGGQDR  | K9  | 48.86 | 1000   | 0.8241758 | 1.013698 | 0.80232510.8800667 |

|        |        |      |                                |     |       |        |           |          |                     |
|--------|--------|------|--------------------------------|-----|-------|--------|-----------|----------|---------------------|
| Pcbp2  | Q61990 | 181  | PK(*)PSSSPVIFAGGQDR(*)         | K2  | 11.68 | 1000   | -         | 1.178082 | -                   |
| Pea15  | Q62048 | 98   | ISEEEELDTK(*)LTR(*)            | K10 | 54.37 | 1000   | 4.7448979 | -        | 1.0833333;2.9141156 |
| Pon3   | Q62087 | 159  | TLK(*)HELLK(*)                 | K3  | 67.74 | 142.99 | 0.7307692 | 1.444444 | 0.880434;1.0185495  |
| Rhoc   | Q62159 | 162  | ISAFGYLEC(+57.02)SAK(*)TK(*)   | K12 | 47.63 | 22.87  | 0.7764705 | 0.695121 | 0.717647(0.7297465  |
| Dag1   | Q62165 | 498  | GGEPNQR(*)PELK(*)NHIDR(*)      | K11 | 51.95 | 1000   | -         | -        | 0.9625              |
| Ddx3x  | Q62167 | 66   | DK(*)DAYSSFGSR(*)              | K2  | 66.34 | 1000   | 0.8585858 | 0.609756 | 0.913043;0.7937951  |
| Ddx3x  | Q62167 | 81   | GK(*)SSFFGDR(*)                | K2  | 62.06 | 1000   | -         | -        | 0.934782609         |
| Ddx3x  | Q62167 | 208  | YTR(*)PTPVQK(*)HAIPK(*)        | K9  | 55.1  | 184.45 | 1.0202020 | 0.792682 | 0.815217;0.8760341  |
| Ddx3x  | Q62167 | 208  | PTPVQK(*)HAIPK(*)              | K6  | 42.41 | 93.15  | 0.5959595 | -        | 0.891304;0.743632   |
| Ssr4   | Q62186 | 94   | YQVSWSLHK(*)SAHAGTYEVR(*)      | K10 | 77.4  | 1000   | 1.1758241 | 0.835443 | 1.044943;1.018737   |
| Dpysl3 | Q62188 | 258  | VMSK(*)SAADLISQAR(*)           | K4  | 88.29 | 1000   | 0.8617021 | 0.653333 | 0.906976;0.8073374  |
| Dpysl3 | Q62188 | 423  | IVSAK(*)NHQSVAEYNIFEGMELR(*)   | K5  | 44.75 | 1000   | -         | -        | 1                   |
| Dpysl3 | Q62188 | 480  | FIPC(+57.02)SPFSDYVYK(*)R(*)   | K13 | 6.79  | 1000   | -         | -        | 1.279069767         |
| Snrpa  | Q62189 | 94   | IQYAK(*)TDSDIK(*)              | K5  | 78.22 | 183.32 | 0.8350515 | 0.947368 | 0.953488;0.9119694  |
| Sf3a2  | Q62203 | 10   | PGGK(*)TGSGGVASSSESNR(*)       | K4  | 95.17 | 1000   | 1         | 0.662790 | 0.810.8242636       |
| Sf3a2  | Q62203 | 10   | M(+58.01)DFQHR(*)PGGK(*)TGSGG  | K10 | 75.98 | 1000   | -         | 0.604651 | 0.770.6873256       |
| Sptbn1 | Q62261 | 1108 | LLTQHNIK(*)NEIDNYEEDYQK(*)     | K9  | 80.07 | 276.94 | 0.9680851 | 0.653846 | 1.021739;0.8812235  |
| Sptbn1 | Q62261 | 214  | NALHK(*)HR(*)PDLIDFDK(*)       | K6  | 75.94 | 57.1   | 0.7234042 | -        | 0.913043;0.8182239  |
| Sptbn1 | Q62261 | 1878 | LQAAYAGDK(*)ADDIQK(*)          | K9  | 68.93 | 112.31 | 0.9468085 | 0.782051 | 1.086956;0.9386054  |
| Sptbn1 | Q62261 | 1653 | HQILEQAVEDYAETVHQLSK(*)TSR(*)  | K20 | 61.54 | 1000   | 1.1170212 | 1.333333 | 11.1501182          |
| Sptbn1 | Q62261 | 1108 | IK(*)NEIDNYEEDYQK(*)           | K2  | 34.22 | 185.99 | 1.0425531 | 1.384615 | 0.967391;1.13152    |
| Sptbn1 | Q62261 | 558  | VLLSQDYGK(*)HLLGVEDLLQK(*)     | K10 | 21.09 | 41.83  | -         | -        | 1.130434783         |
| Ss18   | Q62280 | 13   | GK(*)GEITPAAIQK(*)             | K2  | 55.53 | 140.16 | -         | 1.316455 | -                   |
| Trim28 | Q62318 | 341  | IQK(*)HQEHILR(*)               | K3  | 84.26 | 1000   | 0.9468085 | 0.842105 | 0.913978;0.9009641  |
| Trim28 | Q62318 | 267  | LGDK(*)HATLQK(*)               | K4  | 82.82 | 151.86 | 1.1489361 | 0.973684 | 1.086021;1.0695473  |
| Trim28 | Q62318 | 214  | TVYC(+57.02)NVHK(*)HEPLVLFC(+5 | K8  | 76.44 | 1000   | 1.1702127 | 0.710526 | 1.193548;1.0247625  |
| Trim28 | Q62318 | 338  | QHWTMTK(*)IQK(*)               | K7  | 53.71 | 62.26  | 0.6702127 | 0.921052 | 0.913978;0.8350813  |
| Trim28 | Q62318 | 770  | MFK(*)QFNK(*)                  | K3  | 25.22 | 42.89  | -         | -        | 1                   |
| Tsn    | Q62348 | 187  | LLNLK(*)NDSLRL(*)              | K5  | 92.93 | 1000   | 0.8924731 | 0.905405 | 0.932584;0.9101543  |
| Tsn    | Q62348 | 69   | EHFSTVK(*)THLTSLK(*)           | K7  | 70.75 | 148.49 | 1.0967741 | 0.945945 | 0.966292;1.0030041  |
| Tfrc   | Q62351 | 632  | DLNQFK(*)TDIR(*)               | K6  | 90.65 | 1000   | 0.7741935 | 0.809523 | 0.979166;0.8542947  |
| Tfrc   | Q62351 | 380  | LIVK(*)NVLK(*)                 | K4  | 89.86 | 83.43  | 0.8602150 | 0.892857 | 0.93750.8968574     |
| Tfrc   | Q62351 | 517  | IMQDVK(*)HPVDGK(*)             | K6  | 39.85 | 69.64  | 9.0430107 | 8.940476 | 0.781256.2549123    |
| Tfrc   | Q62351 | 683  | IMK(*)VEYHFLSPYVSPR(*)         | K3  | 23.6  | 1000   | 1.7311827 | -        | 0.614583;1.1728831  |

|         |        |     |                                 |     |       |        |           |          |             |           |
|---------|--------|-----|---------------------------------|-----|-------|--------|-----------|----------|-------------|-----------|
| Tfrc    | Q62351 | 668 | LTTDFHNAEK(*)TNR(*)             | K10 | 17.31 | 1000   | 1.5161290 | -        | 1.03125     | 1.2736895 |
| Tfrc    | Q62351 | 534 | DSNWISK(*)VEK(*)                | K7  | 14.68 | 25.67  | -         | -        | 1.083333333 |           |
| Snrnp70 | Q62376 | 162 | DMHSAYK(*)HADGK(*)              | K7  | 69.41 | 95.62  | 0.8888888 | 0.975308 | 0.978260    | 0.9474861 |
| Zrsr2   | Q62377 | 328 | GK(*)HC(+57.02)NFLHVFR(*)       | K2  | 8.25  | 1000   | -         | -        | -           |           |
| Zpr1    | Q62384 | 119 | EVVK(*)TDSATTR(*)               | K4  | 6.31  | 1000   | 0.8095238 | -        | -           |           |
| Phlda1  | Q62392 | 287 | QAILAVK(*)STR(*)                | K7  | 6.11  | 1000   | -         | -        | -           |           |
| Tpd52   | Q62393 | 101 | EK(*)HLAELK(*)                  | K2  | 27.28 | 102.87 | 1.0674157 | -        | 0.471698    | 0.7695569 |
| Sorbs1  | Q62417 | 269 | SK(*)SEMNYIEGEK(*)              | K2  | 12.6  | 172.15 | -         | -        | 4.346534653 |           |
| Dbnl    | Q62418 | 176 | VGK(*)DNFWAK(*)                 | K3  | 43.7  | 134.33 | -         | 0.506329 | 1.022471    | 0.7644005 |
| Ostf1   | Q62422 | 3   | S(+42.01)K(*)PPPK(*)PVK(*)PGQVK | K2  | 20.08 | 41.53  | -         | 0.948717 | -           |           |
| Cstb    | Q62426 | 56  | IK(*)VDVGGDK(*)                 | K2  | 89.57 | 140.72 | -         | 0.675324 | 0.976744    | 0.8260344 |
| Smad2   | Q62432 | 420 | MSFVK(*)GWGAEYR(*)              | K5  | 87.16 | 1000   | 1.4181818 | 1.05     | 1.014084    | 1.1607554 |
| Fkbp3   | Q62446 | 48  | LLGNIK(*)NVAK(*)                | K6  | 74.84 | 51.96  | 1.1368421 | 0.987179 | 0.955555    | 1.0265257 |
| Fkbp3   | Q62446 | 99  | DSK(*)SEETLDEGPPK(*)            | K3  | 56.44 | 235.98 | 0.8736842 | 1.025641 | 0.788888    | 0.8960714 |
| Fkbp3   | Q62446 | 80  | GTETISK(*)VSEQVK(*)             | K7  | 50.84 | 123.86 | 1.2210526 | 1.282051 | 0.866666    | 1.1232569 |
| Fkbp3   | Q62446 | 170 | VGVGK(*)VIR(*)                  | K5  | 15.47 | 1000   | -         | 1.025641 | -           |           |
| Eif4g2  | Q62448 | 31  | GAPQHYPK(*)TAGNSEFLGK(*)        | K8  | 50.19 | 102.98 | 1.4725274 | 0.855263 | 0.943820    | 1.090537  |
| Eif4g2  | Q62448 | 574 | APK(*)HFLPEMLSK(*)              | K3  | 49.23 | 114.67 | 0.8901098 | -        | 0.932584    | 0.9113471 |
| Eif4g2  | Q62448 | 271 | AK(*)SLMDQYFAR(*)               | K2  | 28.82 | 1000   | 1.0879120 | 0.921052 | -           | 1.0044824 |
| Eif4g2  | Q62448 | 233 | C(+57.02)IK(*)TLLEK(*)          | K3  | 26.32 | 107.29 | -         | -        | 1.134831461 |           |
| Eif4g2  | Q62448 | 170 | LLISK(*)LQDEFENR(*)             | K5  | 13.87 | 1000   | -         | -        | 1.292134831 |           |
| Eif4g2  | Q62448 | 483 | PAQSFLMNK(*)NQVPK(*)            | K9  | 11.03 | 25.58  | -         | -        | 0.97752809  |           |
| Itga3   | Q62470 | 146 | YTK(*)VLWSGLEDQR(*)             | K3  | 43.87 | 1000   | -         | 1.333333 | 0.364       | 0.8486667 |
| Zfp91   | Q62511 | 176 | SK(*)TGSLQLVC(+57.02)K(*)       | K2  | 48.21 | 148.12 | -         | -        | -           |           |
| Zyx     | Q62523 | 525 | NFHMK(*)C(+57.02)YK(*)          | K5  | 31.83 | 57.45  | 1.3068181 | 1.238805 | 1.5125      | 1.3527081 |
| Zyx     | Q62523 | 228 | AK(*)PHVQPQPVSANTQPR(*)         | K2  | 27.31 | 1000   | -         | 1.791044 | 0.7         | 1.2455224 |
| Commd3  | Q63829 | 137 | LEYQIK(*)TNQLHK(*)              | K6  | 24.02 | 121.92 | -         | 0.902439 | 0.778947    | 0.8406932 |
| Map2k2  | Q63932 | 88  | ISELGAGNGGVVTK(*)AR(*)          | K14 | 34.18 | 1000   | -         | 1.727272 | 0.946808    | 1.3370406 |
| Rab34   | Q64008 | 115 | FK(*)C(+57.02)IASTYYR(*)        | K2  | 12    | 1000   | -         | 1.892857 | -           |           |
| Raly    | Q64012 | 183 | LK(*)SSELQTIK(*)                | K2  | 80.77 | 151.55 | 1.0227272 | 0.918918 | 1.034883    | 0.9921766 |
| Raly    | Q64012 | 13  | IQTSNVTNK(*)NDPK(*)             | K9  | 74.26 | 77.51  | 0.9545454 | 0.891891 | 0.965116    | 0.9371845 |
| Raly    | Q64012 | 191 | SSELQTIK(*)TELQIK(*)            | K8  | 55.48 | 148.49 | 0.8181818 | 1.527027 | 1.034883    | 1.1266975 |
| Raly    | Q64012 | 55  | VAGC(+57.02)SVHK(*)GYAFVQYANE   | K8  | 49.57 | 1000   | 0.7727272 | 1.391891 | 0.813953    | 0.9928576 |
| Raly    | Q64012 | 159 | VK(*)TTIPVK(*)                  | K2  | 42.96 | 121.05 | -         | -        | 0.744186047 |           |

|           |        |      |                                    |     |       |        |           |          |          |           |
|-----------|--------|------|------------------------------------|-----|-------|--------|-----------|----------|----------|-----------|
| Raly      | Q64012 | 44   | SDVETIFSK(*)YGR(*)                 | K9  | 9.26  | 1000   | -         | 2.405405 | -        |           |
| Utp14a    | Q640M1 | 136  | EVAFSK(*)TSQTLSK(*)                | K6  | 58.11 | 127.53 | -         | 0.810810 | 1.013888 | 0.9123499 |
| Aebp1     | Q640N1 | 583  | TYSLGK(*)SSR(*)                    | K6  | 14.27 | 1000   | 1.7142857 | -        | 0.561797 | 1.1380417 |
| Spr       | Q64105 | 227  | LK(*)SDGALVDC(+57.02)G TSAQK(*)    | K2  | 84.43 | 322.89 | 1.1555555 | 0.935064 | 0.918604 | 1.003075  |
| Maoa      | Q64133 | 168  | IC(+57.02)WTK(*)TAR(*)             | K5  | 64.61 | 1000   | 1.0919540 | 0.960526 | 1.148148 | 1.0668762 |
| Maoa      | Q64133 | 90   | ELGIETYK(*)VNVNER(*)               | K8  | 17.87 | 1000   | 0.4942528 | 0.684210 | -        | 0.5892317 |
| Btf3      | Q64152 | 65   | IGGK(*)GTAR(*)                     | K4  | 94.09 | 1000   | 1.1348314 | 1.259740 | 1.356321 | 1.2502979 |
| Btf3      | Q64152 | 44   | MK(*)ETIMNQEK(*)                   | K2  | 61.64 | 112.87 | 1.0786516 | 0.831168 | 1.206896 | 1.0389057 |
| Aga       | Q64191 | 109  | IK(*)NAIGVAR(*)                    | K2  | 74.61 | 1000   | 0.8673469 | 0.843373 | 1.023529 | 0.9114166 |
| Actr3b    | Q641P0 | 317  | R(*)PLYK(*)NVVLSGGSTMFR(*)         | K5  | 30.15 | 1000   | -         | -        | -        |           |
| Sf1       | Q64213 | 165  | GNTLK(*)NIEK(*)                    | K5  | 72.77 | 68.07  | 0.8170731 | 0.968253 | 0.975    | 0.920109  |
| Surf4     | Q64310 | 139  | SEGK(*)SMFAGVPTMR(*)               | K4  | 70.94 | 1000   | 0.7282608 | 0.714285 | -        | 0.7212733 |
| Surf4     | Q64310 | 22   | VTK(*)QYLPHVAR(*)                  | K3  | 51.34 | 1000   | 1.0543478 | 1.178571 | 0.902912 | 1.0452773 |
| Sqstm1    | Q64337 | 165  | EHSK(*)LIFPNPFGHLSDFSFSR(*)        | K4  | 56.85 | 1000   | -         | -        | 0.823529 | 0.412     |
| Sqstm1    | Q64337 | 422  | LLQTK(*)NYDIGAALDTIQYSK(*)         | K5  | 45.91 | 179.51 | -         | -        | 0.835294 | 0.118     |
| Sqstm1    | Q64337 | 157  | C(+57.02)SVC(+57.02)PDYDLC(+57.02) | K16 | 19.19 | 1000   | 1.2758620 | -        | -        |           |
| Rgn       | Q64374 | 244  | LPVDK(*)TTSC(+57.02)C(+57.02)FG    | K5  | 17.97 | 71.74  | 0.1839080 | 0.214285 | 0.305555 | 0.2345831 |
| Hspe1     | Q64433 | 56   | GK(*)SGEIEPVSVK(*)                 | K2  | 99.41 | 251.58 | 0.8415841 | 0.835294 | 0.869565 | 0.8488145 |
| Hspe1     | Q64433 | 40   | SQGK(*)VLQATTVAVGSGGK(*)           | K4  | 67.71 | 232.92 | 1.1287128 | 0.682352 | 0.858695 | 0.8899205 |
| Hspe1     | Q64433 | 80   | VLLPEYGGTK(*)VVLDDK(*)             | K10 | 53.22 | 68.95  | 0.4851485 | 0.564705 | 0.684782 | 0.5782123 |
| Hspe1     | Q64433 | 28   | SAAETVTK(*)GGIMLPEK(*)             | K8  | 41.74 | 98.53  | 1.0495049 | 0.552941 | 0.467391 | 0.6899458 |
| Mrc2      | Q64449 | 1236 | TTSC(+57.02)DTK(*)LQGAVC(+57.02)   | K7  | 33.98 | 1000   | -         | -        | 1.010526 | 0.316     |
| Mrc2      | Q64449 | 1146 | WK(*)DALLLC(+57.02)ESR(*)          | K2  | 15.14 | 1000   | -         | 2.455696 | -        |           |
| Hist1h2bb | Q64475 | 6    | PEPSK(*)SAPAPK(*)                  | K5  | 99.01 | 129.72 | -         | -        | -        |           |
| Hist1h2bb | Q64475 | 6    | PEPSK(*)SAPAPK(*)K(*)              | K5  | 75.18 | 136.94 | -         | -        | -        |           |
| Hist1h2bb | Q64475 | 12   | PEPSK(*)SAPAPK(*)K(*)GSK(*)        | K11 | 39.12 | 34.3   | -         | -        | -        |           |
| Hist1h2bb | Q64475 | 6    | PEPSK(*)SAPAPK(*)K(*)GSK(*)        | K5  | 39.12 | 112.07 | -         | -        | -        |           |
| Hist1h2bb | Q64475 | 21   | GSK(*)K(*)AISK(*)AQK(*)            | K8  | 28.58 | 62.26  | -         | -        | -        |           |
| Hist1h2bb | Q64475 | 17   | GSK(*)K(*)AISK(*)AQK(*)            | K4  | 28.58 | 170.44 | -         | -        | -        |           |
| Hist1h2bb | Q64475 | 16   | GSK(*)K(*)AISK(*)AQK(*)            | K3  | 28.58 | 197.82 | -         | -        | -        |           |
| Hist1h2bb | Q64475 | 21   | SK(*)K(*)AISK(*)AQK(*)             | K7  | 6.49  | 40.63  | -         | -        | -        |           |
| Hist1h2bb | Q64475 | 17   | SK(*)K(*)AISK(*)AQK(*)             | K3  | 6.49  | 128.79 | -         | -        | -        |           |
| Hist1h2bb | Q64475 | 16   | SK(*)K(*)AISK(*)AQK(*)             | K2  | 6.49  | 154.54 | -         | -        | -        |           |
| Hist1h2bh | Q64478 | 17   | K(*)GSK(*)K(*)ALTK(*)              | K5  | 94.27 | 47.31  | 1.1666666 | 1.083333 | 1.15625  | 1.1354167 |



|           |        |      |                               |     |       |        |           |          |             |           |
|-----------|--------|------|-------------------------------|-----|-------|--------|-----------|----------|-------------|-----------|
| Hist1h2bh | Q64478 | 16   | K(*)GSK(*)K(*)ALTK(*)         | K4  | 94.27 | 32.97  | 1.1666666 | 1.083333 | 1.15625     | 1.1354167 |
| Hist1h2bh | Q64478 | 6    | EPAK(*)SAPAPK(*)              | K4  | 81.33 | 87.26  | 1.0909090 | 1        | 1.25        | 1.1136364 |
| Hist1h2bh | Q64478 | 6    | P(+42.01)EPAK(*)SAPAPK(*)     | K5  | 79.68 | 47.92  | 1.3333333 | 1.05     | 1.21875     | 1.2006944 |
| Hist1h2bh | Q64478 | 6    | PEPAK(*)SAPAPK(*)K(*)         | K5  | 78.64 | 115.21 | 1.0303030 | 0.883333 | 1.125       | 1.0128788 |
| Hist1h2bh | Q64478 | 13   | PEPAK(*)SAPAPK(*)K(*)GSK(*)   | K12 | 37.88 | 37.81  | 0.9848484 | 1.016666 | 1.21875     | 1.0734217 |
| Hist1h2bh | Q64478 | 12   | PEPAK(*)SAPAPK(*)K(*)GSK(*)   | K11 | 37.88 | 55.21  | 0.9848484 | 1.016666 | 1.21875     | 1.0734217 |
| Hist1h2bh | Q64478 | 6    | PEPAK(*)SAPAPK(*)K(*)GSK(*)   | K5  | 37.88 | 196.17 | 0.9848484 | 1.016666 | 1.21875     | 1.0734217 |
| Hist1h2bh | Q64478 | 21   | GSK(*)K(*)ALTK(*)AQK(*)       | K8  | 14.71 | 24.24  | 0.9242424 | -        | 0.890625    | 0.9074337 |
| Hist1h2bh | Q64478 | 17   | GSK(*)K(*)ALTK(*)AQK(*)       | K4  | 14.71 | 109.53 | 0.9242424 | -        | 0.890625    | 0.9074337 |
| Hist1h2bh | Q64478 | 16   | GSK(*)K(*)ALTK(*)AQK(*)       | K3  | 14.71 | 132.11 | 0.9242424 | -        | 0.890625    | 0.9074337 |
| Top2b     | Q64511 | 459  | LDDANDAGGK(*)HSLEC(+57.02)TLI | K10 | 60.23 | 122.77 | 1.0505050 | 1.523809 | 0.7934781   | 1.1225976 |
| Top2b     | Q64511 | 623  | YYK(*)GLGTSTAK(*)             | K3  | 55.51 | 53.45  | -         | -        | 1.326086957 |           |
| Top2b     | Q64511 | 1311 | K(*)TPTSTGK(*)TNAK(*)         | K8  | 43.09 | 41.04  | -         | 0.773809 | 0.8695651   | 0.8216874 |
| Top2      | Q64514 | 1200 | VLIFAYK(*)HALVNK(*)           | K7  | 79.53 | 129.72 | 0.7849462 | 0.805194 | 0.9333333   | 0.8411581 |
| Top2      | Q64514 | 1130 | QK(*)STLIDALC(+57.02)R(*)     | K2  | 73    | 1000   | 1.2473118 | 0.987012 | 0.9222222   | 1.0521823 |
| Top2      | Q64514 | 1123 | TDPR(*)PDAATIK(*)NDMDK(*)     | K11 | 60.78 | 56.99  | 0.8817204 | 1.064935 | 0.7666666   | 0.9044407 |
| Top2      | Q64514 | 1229 | ENWK(*)NC(+57.02)IQLMK(*)     | K4  | 40.29 | 104.64 | -         | 1.181818 | 0.7222222   | 0.9520202 |
| Top2      | Q64514 | 1217 | FATK(*)LVEEK(*)PTK(*)         | K4  | 35.68 | 115.97 | 0.8494623 | 0.480519 | 0.7444444   | 0.6914754 |
| Top2      | Q64514 | 655  | VNESSHYDLAFTDVHFK(*)PGQIR(*)  | K17 | 29.69 | 1000   | 1.6989247 | -        | 1.4333333   | 1.566129  |
| Top2      | Q64514 | 803  | SWVQTLR(*)PVNAK(*)TR(*)       | K12 | 14    | 1000   | 0.9354838 | 1.597402 | -           | 1.2664432 |
| Top2      | Q64514 | 98   | VLK(*)IPANWTNPLGK(*)          | K3  | 8.95  | 90.32  | -         | -        | 1.011111111 |           |
| Gk        | Q64516 | 346  | DNLGIK(*)SSEIEK(*)            | K7  | 16.25 | 96.04  | 32.5375   | -        | -           |           |
| Guk1      | Q64520 | 17   | PVVLSGPGAGK(*)STLLK(*)        | K12 | 82.65 | 84.49  | 1.2153846 | 0.551020 | 1.075       | 0.947135  |
| Gpd2      | Q64521 | 197  | SSVLSK(*)SR(*)                | K7  | 57.05 | 1000   | 0.6730769 | -        | 0.8314601   | 0.7522688 |
| Gpd2      | Q64521 | 634  | FHK(*)FDEDEK(*)               | K3  | 48.5  | 97.87  | -         | -        | 1.011235955 |           |
| Gpd2      | Q64521 | 94   | GLK(*)TALVER(*)               | K3  | 43.04 | 1000   | 1.4615384 | -        | -           |           |
| Gpd2      | Q64521 | 706  | LAILMK(*)TAEENLDR(*)          | K6  | 23.33 | 1000   | -         | 11.17857 | 4.2247191   | 7.7016453 |
| Hist2h2bb | Q64525 | 109  | PGELAK(*)HAVSEGTK(*)          | K6  | 95.08 | 216.51 | -         | -        | -           |           |
| Hist2h2bb | Q64525 | 6    | PAK(*)SAPAPK(*)               | K3  | 94.59 | 132.53 | -         | -        | -           |           |
| Hist2h2bb | Q64525 | 117  | HAVSEGTK(*)AVTK(*)            | K8  | 91.27 | 91.04  | -         | -        | -           |           |
| Hist2h2bb | Q64525 | 13   | SAPAPK(*)K(*)GSK(*)           | K7  | 88.37 | 32.97  | -         | -        | -           |           |
| Hist2h2bb | Q64525 | 12   | SAPAPK(*)K(*)GSK(*)           | K6  | 88.37 | 42.89  | -         | -        | -           |           |
| Hist2h2bb | Q64525 | 109  | LPGELAK(*)HAVSEGTK(*)         | K7  | 88.13 | 217.23 | -         | -        | -           |           |
| Hist2h2bb | Q64525 | 44   | K(*)ESYSVYVYK(*)VLK(*)        | K10 | 86.34 | 50.22  | -         | -        | -           |           |

|           |        |     |                                |     |       |        |           |          |                    |
|-----------|--------|-----|--------------------------------|-----|-------|--------|-----------|----------|--------------------|
| Hist2h2bb | Q64525 | 6   | PDPAK(*)SAPAPK(*)              | K5  | 85.5  | 134.33 | -         | -        | -                  |
| Hist2h2bb | Q64525 | 44  | ESYSVYVK(*)VLK(*)              | K9  | 77.58 | 37.81  | -         | -        | -                  |
| Hist2h2bb | Q64525 | 109 | GELAK(*)HAVSEGTK(*)            | K5  | 74.19 | 192.66 | -         | -        | -                  |
| Hist2h2bb | Q64525 | 13  | SAPAPK(*)K(*)GSK(*)K(*)        | K7  | 72.28 | 64.53  | -         | -        | -                  |
| Hist2h2bb | Q64525 | 12  | SAPAPK(*)K(*)GSK(*)K(*)        | K6  | 72.28 | 94.22  | -         | -        | -                  |
| Hist2h2bb | Q64525 | 109 | LLPGELAK(*)HAVSEGTK(*)         | K9  | 70.34 | 118.18 | -         | -        | -                  |
| Hist2h2bb | Q64525 | 44  | SVYVK(*)VLK(*)                 | K6  | 69.06 | 53.53  | -         | -        | -                  |
| Hist2h2bb | Q64525 | 21  | AVTK(*)VQK(*)                  | K4  | 62.25 | 55.63  | -         | -        | -                  |
| Hist2h2bb | Q64525 | 109 | LLPGELAK(*)HAVSEGTK(*)         | K8  | 60.7  | 107.15 | -         | -        | -                  |
| Hist2h2bb | Q64525 | 109 | ELAK(*)HAVSEGTK(*)             | K4  | 57.01 | 99.23  | -         | -        | -                  |
| Hist2h2bb | Q64525 | 109 | LAK(*)HAVSEGTK(*)              | K3  | 55.29 | 161.77 | -         | -        | -                  |
| Hist2h2bb | Q64525 | 109 | AK(*)HAVSEGTK(*)               | K2  | 52.06 | 197.82 | -         | -        | -                  |
| Hist2h2bb | Q64525 | 21  | GSK(*)K(*)AVTK(*)VQK(*)        | K8  | 50.74 | 68.47  | -         | -        | -                  |
| Hist2h2bb | Q64525 | 17  | GSK(*)K(*)AVTK(*)VQK(*)        | K4  | 50.74 | 186.64 | -         | -        | -                  |
| Hist2h2bb | Q64525 | 16  | GSK(*)K(*)AVTK(*)VQK(*)        | K3  | 50.74 | 216.51 | -         | -        | -                  |
| Hist2h2bb | Q64525 | 21  | K(*)AVTK(*)VQK(*)              | K5  | 50.54 | 77.24  | -         | -        | -                  |
| Hist2h2bb | Q64525 | 47  | VLK(*)QVHPDTGISSK(*)           | K3  | 46.46 | 215.31 | -         | -        | -                  |
| Hist2h2bb | Q64525 | 21  | K(*)AVTK(*)VQK(*)K(*)          | K5  | 39.13 | 72.65  | -         | -        | -                  |
| Hist2h2bb | Q64525 | 21  | SK(*)K(*)AVTK(*)VQK(*)         | K7  | 33.82 | 77.24  | -         | -        | -                  |
| Hist2h2bb | Q64525 | 17  | SK(*)K(*)AVTK(*)VQK(*)         | K3  | 33.82 | 184.45 | -         | -        | -                  |
| Hist2h2bb | Q64525 | 16  | SK(*)K(*)AVTK(*)VQK(*)         | K2  | 33.82 | 217.23 | -         | -        | -                  |
| Hist2h2bb | Q64525 | 13  | PDPAK(*)SAPAPK(*)K(*)GSK(*)    | K12 | 24.69 | 34.94  | -         | -        | -                  |
| Hist2h2bb | Q64525 | 12  | PDPAK(*)SAPAPK(*)K(*)GSK(*)    | K11 | 24.69 | 63.97  | -         | -        | -                  |
| Hist2h2bb | Q64525 | 6   | PDPAK(*)SAPAPK(*)K(*)GSK(*)    | K5  | 24.69 | 185.69 | -         | -        | -                  |
| Srm       | Q64674 | 113 | EVVK(*)HPSVESVVQC(+57.02)EIDEI | K4  | 55.71 | 258.35 | -         | -        | 1.053191489        |
| Srm       | Q64674 | 253 | MLC(+57.02)SK(*)NPSTNFR(*)     | K5  | 41.17 | 1000   | 0.7373737 | 0.506024 | 1.31914890.8541823 |
| Srm       | Q64674 | 194 | ESYYQLMK(*)TALK(*)             | K8  | 18.81 | 44.28  | 1.3030303 | -        | 1.17021271.2366215 |
| Vcl       | Q64727 | 216 | IFVTTK(*)NSK(*)                | K6  | 86.33 | 30.72  | 1         | 0.923076 | 0.85869560.9272575 |
| Vcl       | Q64727 | 699 | NPGNQAAEYHFETMK(*)NQWIDNVE     | K15 | 85.52 | 77.76  | -         | -        | 0.945652174        |
| Vcl       | Q64727 | 476 | QVATALQNLQTK(*)TNR(*)          | K12 | 82.15 | 1000   | 0.8865979 | 1.012820 | 0.83695610.912125  |
| Vcl       | Q64727 | 496 | AAVHLEGK(*)IEQAQR(*)           | K8  | 80.32 | 1000   | 0.8762886 | 0.794871 | 0.9239130.8650245  |
| Vcl       | Q64727 | 666 | STVEGIQASVK(*)TAR(*)           | K11 | 60.39 | 1000   | 0.5257731 | 0.820512 | -0.673143          |
| Vcl       | Q64727 | 276 | ALASIDSK(*)LNQAK(*)            | K8  | 51.18 | 51     | -         | -        | 1.02173913         |
| Vcl       | Q64727 | 655 | AAAVGTANK(*)STVEGIQASVK(*)     | K9  | 50.98 | 141.98 | -         | -        | 0.858695652        |

|        |        |      |                                 |     |       |        |           |          |             |           |
|--------|--------|------|---------------------------------|-----|-------|--------|-----------|----------|-------------|-----------|
| Vcl    | Q64727 | 281  | LNQAK(*)GWLR(*)                 | K5  | 49.16 | 1000   | 0.6597938 | -        | 0.978260    | 0.8190273 |
| Vcl    | Q64727 | 228  | NQGIEEALK(*)NR(*)               | K9  | 29.99 | 1000   | 0.6494845 | -        | -           | -         |
| Vcl    | Q64727 | 219  | NSK(*)NQGIEEALK(*)              | K3  | 25.84 | 202.16 | 3.7216494 | 5.987179 | 3.358695    | 4.3558415 |
| Gart   | Q64737 | 251  | IK(*)NTILQR(*)                  | K2  | 96.04 | 1000   | 0.9021739 | 0.833333 | 0.922222    | 0.8859098 |
| Gart   | Q64737 | 162  | GVIVAK(*)SQAEAC(+57.02)R(*)     | K6  | 80.48 | 1000   | 0.5       | 0.525641 | 0.7         | 0.5752137 |
| Gart   | Q64737 | 832  | DPK(*)SSSHIVLVISNK(*)           | K3  | 59.61 | 191.91 | -         | 0.730769 | 0.977777    | 0.8542735 |
| Gart   | Q64737 | 844  | SSSHIVLVISNK(*)AAVAGLDR(*)      | K12 | 53.79 | 1000   | -         | -        | 0.988888889 | -         |
| Ptpmt1 | Q66GT5 | 53   | IDHTVLLGALPLK(*)NMTR(*)         | K13 | 27.82 | 1000   | -         | -        | 4.533333333 | -         |
| Kn1    | Q66JQ7 | 204  | TGK(*)HISSTELDK(*)ENAIPVYSK(*)  | K3  | 24.04 | 77.37  | -         | -        | -           | -         |
| Bcl9l  | Q67FY2 | 43   | GHC(+57.02)PPAPAK(*)PMHPENK(*)  | K16 | 87.82 | 23.15  | -         | 0.543689 | 2.06        | 1.3018447 |
| Bcl9l  | Q67FY2 | 36   | GHC(+57.02)PPAPAK(*)PMHPENK(*)  | K9  | 87.82 | 49.25  | -         | 0.543689 | 2.06        | 1.3018447 |
| Bcl9l  | Q67FY2 | 83   | GVGAGSHGAK(*)ANQISPSNSSLK(*)    | K10 | 77.45 | 106.18 | -         | 0.582524 | 1.14        | 0.8612621 |
| Bcl9l  | Q67FY2 | 73   | LGSK(*)GVGAGSHGAK(*)            | K4  | 68.84 | 168.51 | -         | 0.601941 | 1.48        | 1.0409709 |
| Bcl9l  | Q67FY2 | 1278 | LMGK(*)GMTGR(*)                 | K4  | 59.2  | 1000   | -         | 0.553398 | 1.04        | 0.796699  |
| Bcl9l  | Q67FY2 | 108  | NPQAGVSPFSSLK(*)GK(*)VK(*)      | K13 | 55.77 | 25.7   | -         | -        | 0.94        | -         |
| Bcl9l  | Q67FY2 | 73   | VNQGPTC(+57.02)NLGSK(*)GVGAG    | K12 | 39.73 | 30.19  | -         | 0.650485 | 1.78        | 1.2152427 |
| Bcl9l  | Q67FY2 | 83   | LGSK(*)GVGAGSHGAK(*)ANQISPSN    | K14 | 13.38 | 101.58 | -         | 0.766990 | 1.56        | 1.1634951 |
| Bcl9l  | Q67FY2 | 73   | LGSK(*)GVGAGSHGAK(*)ANQISPSN    | K4  | 13.38 | 139.63 | -         | 0.766990 | 1.56        | 1.1634951 |
| Bcl9l  | Q67FY2 | 7    | ILANK(*)TR(*)                   | K5  | 12.43 | 1000   | -         | -        | -           | -         |
| Sbno1  | Q689Z5 | 440  | AK(*)NLC(+57.02)PVGSSK(*)       | K2  | 21.23 | 106.84 | 0.6       | -        | 1.430232    | 1.0151163 |
| Cltc   | Q68FD5 | 1501 | LEK(*)HELIEFR(*)                | K3  | 94.64 | 1000   | 0.9072164 | 0.8875   | 0.934782    | 0.909833  |
| Cltc   | Q68FD5 | 487  | ANVPNK(*)VIQC(+57.02)FAETGQVC   | K6  | 81.94 | 249.09 | 0.8350515 | 0.775    | 0.913043    | 0.8410317 |
| Cltc   | Q68FD5 | 1609 | EYLTk(*)VDK(*)                  | K5  | 81.65 | 50.22  | 0.6391752 | 0.65     | 1.021739    | 0.7703048 |
| Cltc   | Q68FD5 | 1516 | IAAYLFK(*)GNRR(*)               | K7  | 80.13 | 1000   | -         | 0.7875   | 0.891304    | 0.8394022 |
| Cltc   | Q68FD5 | 1347 | VNIPK(*)VLR(*)                  | K5  | 77.42 | 1000   | 0.8556701 | 0.7125   | 0.826086    | 0.7980857 |
| Cltc   | Q68FD5 | 1397 | DIITK(*)VANVELYYK(*)            | K5  | 71.24 | 199.69 | -         | -        | 0.815217391 | -         |
| Cltc   | Q68FD5 | 100  | MK(*)AHTMTDDVTFWK(*)            | K2  | 66.73 | 174.64 | 0.9072164 | 0.8375   | 1.010869    | 0.9185287 |
| Cltc   | Q68FD5 | 737  | YIQAAC(+57.02)K(*)TGQIK(*)      | K7  | 64.99 | 81.69  | 0.8659793 | 0.9375   | 0.891304    | 0.8982612 |
| Cltc   | Q68FD5 | 163  | QK(*)WLLLTGISAQQNR(*)           | K2  | 60.69 | 1000   | 0.8041237 | 0.9      | 0.891304    | 0.8651427 |
| Cltc   | Q68FD5 | 1461 | SVQNHNNK(*)SVNESLNNLFITEEDYC    | K8  | 59.57 | 1000   | -         | -        | 0.956521739 | -         |
| Cltc   | Q68FD5 | 571  | LLDALK(*)NNR(*)PSEGPLQTR(*)     | K6  | 58.34 | 1000   | 0.7422680 | -        | 0.891304    | 0.8167862 |
| Cltc   | Q68FD5 | 86   | AGK(*)TLQIFNIEMK(*)             | K3  | 48.75 | 252.77 | 1.0103092 | -        | 0.891304    | 0.9508068 |
| Cltc   | Q68FD5 | 1264 | EVC(+57.02)FAC(+57.02)VDGK(*)EF | K10 | 48.05 | 1000   | -         | 0.85     | -           | -         |
| Cltc   | Q68FD5 | 1254 | TWK(*)EVC(+57.02)FAC(+57.02)VD  | K3  | 43.78 | 154.29 | 0.8762886 | -        | 0.586956    | 0.7316226 |

|         |        |      |                                |     |       |        |           |          |          |           |
|---------|--------|------|--------------------------------|-----|-------|--------|-----------|----------|----------|-----------|
| Cltc    | Q68FD5 | 269  | QJSEK(*)HDEVFLITK(*)           | K5  | 38.09 | 165.61 | 0.6288659 | 1.2625   | 0.891304 | 0.9275568 |
| Cltc    | Q68FD5 | 1118 | AQLQK(*)GMVK(*)                | K5  | 25.84 | 26.36  | -         | -        | 1.695652 | 1.74      |
| Cltc    | Q68FD5 | 881  | IHEGC(+57.02)EEPATHNALAK(*)IYI | K16 | 14.69 | 1000   | 0.9175257 | -        | 2.195652 | 1.556589  |
| Cltc    | Q68FD5 | 456  | EDK(*)LEC(+57.02)SEELGDLVK(*)  | K3  | 14.2  | 126.66 | -         | -        | 1.760869 | 1.565     |
| Cltc    | Q68FD5 | 1612 | VDK(*)LDAESLR(*)               | K3  | 11.11 | 1000   | 1.2886597 | 1.35     | 0.858695 | 1.1657851 |
| Galk2   | Q68FH4 | 168  | LSK(*)VELAEIC(+57.02)AK(*)     | K3  | 46.64 | 159.26 | -         | -        | 0.378947 | 1.368     |
| Galk2   | Q68FH4 | 177  | VELAEIC(+57.02)AK(*)SER(*)     | K9  | 45.21 | 1000   | 0.7816091 | 0.835616 | 1.2      | 0.9390752 |
| Galk2   | Q68FH4 | 440  | LAQEK(*)HSLFATK(*)             | K5  | 37.86 | 105.32 | 1.2413793 | 0.643835 | 0.810526 | 0.8985804 |
| Ahcyl2  | Q68FL4 | 191  | GSSDFC(+57.02)VK(*)NIK(*)      | K8  | 27.07 | 29.32  | 0.6585365 | 0.309941 | 0.890625 | 0.619701  |
| Mars    | Q68FL6 | 337  | EIC(+57.02)DK(*)YHAIHADIYR(*)  | K5  | 57.83 | 1000   | 1.2150537 | 0.839506 | 1.054945 | 1.0365017 |
| Msl2    | Q69ZF8 | 406  | TVLLSTK(*)SMK(*)               | K7  | 69.7  | 49.37  | -         | -        | -        |           |
| Jmjd1c  | Q69ZK6 | 1150 | SSSGANK(*)TDYLK(*)PEAGETGR(*)  | K7  | 47.11 | 23.7   | -         | -        | 0.778761 | 1.062     |
| Myof    | Q69ZN7 | 1494 | GK(*)SDENEDPSVVGFEK(*)         | K2  | 78.14 | 196.81 | 0.8421052 | 0.846153 | 0.831460 | 0.8399066 |
| Myof    | Q69ZN7 | 1923 | AK(*)TASLFEQR(*)               | K2  | 73.61 | 1000   | 0.7578947 | 0.833333 | 0.752808 | 0.7813457 |
| Myof    | Q69ZN7 | 799  | YC(+57.02)GK(*)TQTILLK(*)      | K4  | 66.97 | 142.27 | 0.8421052 | 0.961538 | 0.876404 | 0.8933494 |
| Myof    | Q69ZN7 | 662  | LQSNIEAVK(*)SGIQGK(*)          | K9  | 56.35 | 104.48 | -         | 0.743589 | 0.775280 | 0.7594353 |
| Myof    | Q69ZN7 | 450  | LTK(*)NDVVGTTYLYLSK(*)         | K3  | 43.41 | 208.61 | -         | 1.448717 | 1        | 1.224359  |
| Myof    | Q69ZN7 | 19   | FGK(*)PDPIVSVIFK(*)            | K3  | 41.61 | 118.06 | 0.6842105 | -        | 0.808988 | 0.7465996 |
| Myof    | Q69ZN7 | 625  | TK(*)PVVTLTSYWEDISHR(*)        | K2  | 37.21 | 1000   | -         | -        | 1.438202 | 1.247     |
| Myof    | Q69ZN7 | 1785 | VIIWNTK(*)DVILDEK(*)           | K7  | 31.21 | 125.04 | 0.9578947 | -        | 0.977528 | 0.9677114 |
| Myof    | Q69ZN7 | 1701 | DYHLDEFEANK(*)ILHQHLGAPEER(*)  | K11 | 28.01 | 1000   | -         | -        | 0.719101 | 1.124     |
| Myof    | Q69ZN7 | 1817 | QK(*)TDVHYR(*)                 | K2  | 3.86  | 1000   | 3.3578947 | -        | -        |           |
| Hectd1  | Q69ZR2 | 229  | GVDPAPLAK(*)HGLTEELLSR(*)      | K9  | 46.3  | 1000   | -         | -        | 0.571428 | 1.571     |
| Hectd1  | Q69ZR2 | 2285 | LMC(+57.02)MGDIK(*)SNMSK(*)    | K8  | 39.76 | 38.77  | -         | 0.988095 | -        |           |
| Pds5a   | Q6A026 | 1210 | IISVTPVK(*)NIDTVK(*)           | K8  | 81.98 | 74.28  | 1.0520833 | 0.682926 | 0.903225 | 0.879412  |
| Pds5a   | Q6A026 | 973  | QC(+57.02)LLK(*)NISIR(*)       | K5  | 52.96 | 1000   | 0.9270833 | 0.780487 | 0.967741 | 0.891771  |
| Pds5a   | Q6A026 | 1118 | DFC(+57.02)NDK(*)SYISEETR(*)   | K6  | 33.83 | 1000   | -         | -        | 4.795698 | 1.925     |
| Pds5a   | Q6A026 | 849  | WLLGMK(*)NNQSK(*)              | K6  | 30.03 | 36.47  | 0.9479166 | 0.902439 | 0.784946 | 0.878434  |
| Swap70  | Q6A028 | 537  | DK(*)VAHHEGLIR(*)              | K2  | 63.79 | 1000   | 1.1954022 | 0.948051 | 0.881720 | 1.0083916 |
| Cdc5l   | Q6A068 | 7    | IMIK(*)GGVWR(*)                | K4  | 46.13 | 1000   | 0.8260869 | -        | -        |           |
| Cdc5l   | Q6A068 | 106  | TAAQC(+57.02)LEHYEFLLDK(*)TAQF | K15 | 18.53 | 1000   | -         | -        | 1.177777 | 1.778     |
| FAM120A | Q6A0A9 | 12   | GVQGFQDYIEK(*)HC(+57.02)PSAVV  | K11 | 45.39 | 27.74  | 0.7127659 | 0.851351 | 1        | 0.8547058 |
| FAM120A | Q6A0A9 | 930  | TSK(*)SQGGVQPIPSQGGK(*)        | K3  | 39.14 | 206.62 | 0.8723404 | -        | 0.883720 | 0.8780307 |
| FAM120A | Q6A0A9 | 576  | IFHILTK(*)GEIK(*)              | K7  | 36.43 | 59.3   | 0.6702127 | 1.094594 | 1.465116 | 1.0766412 |

|         |        |      |                                  |     |       |        |           |          |          |           |
|---------|--------|------|----------------------------------|-----|-------|--------|-----------|----------|----------|-----------|
| FAM120A | Q6A0A9 | 424  | NLTEQNSYSNIPHEGK(*)HTPLYER(*)    | K16 | 36.08 | 1000   | 1.0957446 | -        | 1.034883 | 1.0653142 |
| Usp7    | Q6A4J8 | 915  | EEEITLYPDK(*)HGC(+57.02)VR(*)    | K10 | 53.68 | 1000   | 1.1578947 | 0.896103 | 1.287356 | 1.113785  |
| Usp7    | Q6A4J8 | 935  | AVELGDK(*)ASGR(*)                | K7  | 16.15 | 1000   | 1.0105263 | -        | 0.827586 | 0.9190563 |
| Usp7    | Q6A4J8 | 825  | MNYFQVAK(*)TVAQR(*)              | K8  | 12.91 | 1000   | -         | -        | 1.367816 | 0.92      |
| Ncapg2  | Q6DFV1 | 248  | MIHETIK(*)NQLAGLQK(*)            | K7  | 41.81 | 154.74 | 1.24      | 0.954545 | 1.175    | 1.1231818 |
| Ncapg2  | Q6DFV1 | 178  | SLETK(*)SGADVC(+57.02)R(*)       | K5  | 33.82 | 1000   | -         | -        | 0.725    |           |
| Nop58   | Q6DFW4 | 365  | MLAAK(*)TVLAIR(*)                | K5  | 90.38 | 1000   | 0.7216494 | -        | 0.967391 | 0.8445204 |
| Nop58   | Q6DFW4 | 310  | LIAHAGSLLNLAK(*)HAASTVQILGAEK(*) | K13 | 49.34 | 101.11 | -         | -        | 0.902173 | 0.913     |
| Nop58   | Q6DFW4 | 310  | AGSLLNLAK(*)HAASTVQILGAEK(*)     | K9  | 19.42 | 116.12 | -         | -        | 0.858695 | 0.652     |
| Nop58   | Q6DFW4 | 310  | LAK(*)HAASTVQILGAEK(*)           | K3  | 6.72  | 81.1   | -         | -        | 1.652173 | 0.913     |
| Scaf8   | Q6DID3 | 41   | FYK(*)HVVQSVEK(*)                | K3  | 59.46 | 192.66 | -         | 1.191780 | 0.698529 | 0.9451551 |
| A2m     | Q6GQT1 | 1047 | VLK(*)SFAQAR(*)                  | K3  | 10.55 | 1000   | 0.6666666 | 0.333333 | 0.181818 | 0.3939394 |
| Nomo1   | Q6GQT9 | 53   | LYTK(*)HGTLLK(*)                 | K4  | 74.16 | 105.53 | 0.8105263 | 0.842105 | 0.934782 | 0.8624714 |
| Jade3   | Q6IE82 | 601  | YPLESK(*)SNC(+57.02)LQTSR(*)     | K6  | 53.22 | 1000   | -         | -        | -        |           |
| Jade3   | Q6IE82 | 812  | TK(*)THPHSHSSMQR(*)              | K2  | 33.81 | 1000   | -         | -        | -        |           |
| Jade3   | Q6IE82 | 299  | MEPVTK(*)ISHIPPSR(*)             | K6  | 28.9  | 1000   | -         | -        | -        |           |
| Jade3   | Q6IE82 | 35   | SK(*)NPK(*)EQK(*)                | K5  | 12.76 | 49.37  | -         | -        | -        |           |
| Jade3   | Q6IE82 | 32   | SK(*)NPK(*)EQK(*)                | K2  | 12.76 | 113.99 | -         | -        | -        |           |
| Gpsm1   | Q6IR34 | 90   | ALQFHK(*)HDLILLAR(*)             | K6  | 49.19 | 1000   | 0.9655172 | 0.782608 | 0.933333 | 0.8938198 |
| Tpm4    | Q6IRU2 | 116  | EAK(*)HITDEADR(*)                | K3  | 75.61 | 1000   | 0.9690721 | 0.975308 | 0.890109 | 0.9448302 |
| Tpm4    | Q6IRU2 | 169  | NVTNNLK(*)SLEAASEK(*)            | K7  | 57.33 | 131.34 | 0.9896907 | 0.950617 | 1.010989 | 0.9837657 |
| Tpm4    | Q6IRU2 | 116  | EAK(*)HITDEADR(*)K(*)            | K3  | 40.09 | 135.47 | 1.2371134 | 1.197530 | 1.087912 | 1.1741855 |
| Cltb    | Q6IRU5 | 204  | VAQLC(+57.02)DFNPK(*)SSK(*)      | K10 | 59.24 | 57.45  | 0.8965517 | 0.822784 | 0.442176 | 0.7205045 |
| Cltb    | Q6IRU5 | 204  | LC(+57.02)DFNPK(*)SSK(*)         | K7  | 30.87 | 45.7   | 0.5977011 | -        | 0.639455 | 0.6185785 |
| Exoc3   | Q6KAR6 | 38   | VAGMLQR(*)PDQLDK(*)VEQYR(*)      | K13 | 27.07 | 1000   | 1.2022471 | 0.552380 | 0.990825 | 0.9151513 |
| Nipbl   | Q6KCD5 | 610  | SDPELSK(*)SEMK(*)                | K7  | 33.82 | 44.28  | -         | 0.485148 | -        |           |
| Nipbl   | Q6KCD5 | 1593 | LLVHQFSNK(*)STEMALR(*)           | K9  | 14.59 | 1000   | -         | -        | 1.449438 | 0.202     |
| Pdcd11  | Q6NS46 | 1049 | HSLAIGDK(*)VTGTIK(*)             | K8  | 32.38 | 66.36  | 1.0625    | 0.567901 | -        | 0.8152006 |
| Pdcd11  | Q6NS46 | 378  | FK(*)NAGAIFR(*)                  | K2  | 28.94 | 1000   | -         | -        | 0.849462 | 0.366     |
| U2surp  | Q6NV83 | 88   | AFSIGK(*)MSTAK(*)                | K6  | 32.69 | 56.94  | -         | 1.056179 | 1.586538 | 1.3213591 |
| Cpsf6   | Q6NVF9 | 483  | VLISSLQDC(+57.02)LHGIESK(*)SYG   | K16 | 75.14 | 1000   | -         | -        | 0.987654 | 0.321     |
| Cpsf6   | Q6NVF9 | 459  | QSK(*)VSADDR(*)                  | K3  | 29.64 | 1000   | 1.1075268 | -        | 1.197530 | 1.1525289 |
| Dnajc8  | Q6NZB0 | 40   | DSVLTSK(*)NQIER(*)               | K7  | 71.93 | 1000   | 0.8811881 | 0.825581 | 1.074468 | 0.9270792 |
| Dnajc8  | Q6NZB0 | 164  | QAVYK(*)QTMK(*)                  | K5  | 11.67 | 28.7   | 2.4158415 | -        | -        |           |

|           |        |      |                                     |     |       |        |           |          |           |           |
|-----------|--------|------|-------------------------------------|-----|-------|--------|-----------|----------|-----------|-----------|
| Zc3h11a   | Q6NZF1 | 577  | VAGK(*)PVLTAVSGVTR(*)               | K4  | 39.67 | 1000   | 5.5121951 | 0.842696 | -         | 3.1774459 |
| Eif4g1    | Q6NZJ6 | 929  | LLK(*)NHDEESLEC(+57.02)LC(+57.02)K3 | K3  | 89.88 | 1000   | 0.9255319 | 0.768292 | 1.010638  | 0.9014876 |
| Eif4g1    | Q6NZJ6 | 1505 | VDVQVLK(*)VR(*)                     | K7  | 74.46 | 1000   | 0.6489361 | 1.012195 | 0.893617  | 0.8515828 |
| Eif4g1    | Q6NZJ6 | 601  | YEYK(*)SDQWK(*)PLNLEEK(*)           | K4  | 25.11 | 23.7   | 0.8404255 | -        | 0.765957  | 0.8031915 |
| Znf740    | Q6NZQ6 | 40   | FDLSSK(*)GHR(*)                     | K6  | 39.74 | 1000   | 1.5256410 | -        | 0.991803  | 1.2587222 |
| Xpnpep1   | Q6P1B1 | 322  | AVK(*)NSAESDGMR(*)                  | K3  | 54.3  | 1000   | 0.6702127 | 1.064102 | 0.942528  | 0.8922814 |
| Ppp2r2a   | Q6P1F6 | 123  | LWK(*)ISER(*)                       | K3  | 25.26 | 1000   | -         | -        | 0.6521739 | 13        |
| Heatr6    | Q6P1G0 | 1140 | VALK(*)HIHR(*)                      | K4  | 25.92 | 1000   | 0.9277108 | -        | 0.963855  | 0.9457831 |
| Nsd3      | Q6P2L6 | 790  | K(*)FPTAIFESK(*)GFR(*)              | K10 | 69.92 | 142.42 | 0.5915492 | 0.820224 | 0.879120  | 0.7636316 |
| Nsd3      | Q6P2L6 | 471  | IAWK(*)TAAAR(*)                     | K4  | 52.09 | 1000   | 1.1760563 | 1.101123 | 2.164835  | 1.4806717 |
| Nsd3      | Q6P2L6 | 532  | GIGNK(*)TEISVR(*)                   | K5  | 45.61 | 1000   | 0.3943661 | -        | 0.868131  | 0.631249  |
| Nsd3      | Q6P2L6 | 790  | FPTAIFESK(*)GFR(*)                  | K9  | 18.84 | 1000   | -         | -        | 1         |           |
| Znf280c   | Q6P3Y5 | 180  | TGVDQTLGLK(*)HPSTSK(*)              | K10 | 36.87 | 63.05  | 0.9833333 | 0.915492 | 1.063829  | 0.987552  |
| Znf280c   | Q6P3Y5 | 343  | FMNHMK(*)HHLELEK(*)                 | K6  | 15.53 | 96.04  | -         | 1.098591 | 1.393617  | 1.2461043 |
| Sik3      | Q6P4S6 | 41   | IIDK(*)SQLDEENLK(*)                 | K4  | 46.86 | 186.74 | 1.0388349 | 0.589473 | 0.805555  | 0.8112881 |
| Snrrnp200 | Q6P4T2 | 1552 | PVYHAITK(*)HSPK(*)                  | K8  | 80.87 | 69.71  | 0.8686868 | 0.9375   | 0.793478  | 0.866555  |
| Snrrnp200 | Q6P4T2 | 1890 | FNDPHVK(*)TNLLLQAHLR(*)             | K7  | 64.11 | 1000   | 1.1212121 | -        | 0.945652  | 1.0334321 |
| Snrrnp200 | Q6P4T2 | 479  | YAQAGFEGFK(*)TLNR(*)                | K10 | 55.14 | 1000   | 1.5656565 | 1.1125   | 1.173913  | 1.2840232 |
| Snrrnp200 | Q6P4T2 | 1025 | VFSLSSEFK(*)NITVR(*)                | K9  | 52.91 | 1000   | -         | -        | 0.945652  | 174       |
| Snrrnp200 | Q6P4T2 | 1110 | GWAQLTDK(*)TLNLC(+57.02)K(*)        | K8  | 43.9  | 85.52  | 0.8888888 | -        | 1.326086  | 1.1074879 |
| Snrrnp200 | Q6P4T2 | 718  | IMEHAGK(*)NQVLVVFVHSR(*)            | K7  | 42.83 | 1000   | 0.6969696 | 1        | 0.717391  | 0.804787  |
| Snrrnp200 | Q6P4T2 | 770  | TEAEQC(+57.02)K(*)NLELK(*)          | K7  | 34.21 | 81.69  | 0.7878787 | 0.525    | 0.967391  | 0.76009   |
| Snrrnp200 | Q6P4T2 | 523  | EIGK(*)HINMDGTINVDDFK(*)            | K4  | 28.47 | 145.95 | 2.4646464 | -        | 1.260869  | 1.862758  |
| Abcf1     | Q6P542 | 339  | TLLK(*)HIANR(*)                     | K5  | 76.36 | 1000   | -         | -        | 0.920454  | 545       |
| Rrp12     | Q6P5B0 | 48   | PSGK(*)SDLTVDAVK(*)                 | K4  | 76.05 | 186.74 | 0.97      | 0.682926 | 0.882978  | 0.8453019 |
| Rrp12     | Q6P5B0 | 672  | TLITK(*)GC(+57.02)EAEADR(*)         | K5  | 36.91 | 1000   | 0.68      | -        | 0.872340  | 0.7761702 |
| Rrp12     | Q6P5B0 | 961  | DVVK(*)SALGFIK(*)                   | K4  | 21.3  | 90.54  | 0.95      | -        | 0.797872  | 0.8739362 |
| Rrp12     | Q6P5B0 | 265  | AAQHGV(+57.02)SVLK(*)GSDFMF         | K11 | 4.46  | 43     | -         | -        | 0.829787  | 234       |
| Smchd1    | Q6P5D8 | 1350 | GVYNK(*)STIEGPTIK(*)                | K5  | 39.52 | 143.22 | -         | -        | 1.258426  | 966       |
| Smchd1    | Q6P5D8 | 900  | GPVNSC(+57.02)QGK(*)NFNK(*)         | K9  | 36.31 | 70.86  | 3.9354838 | -        | -         |           |
| Smchd1    | Q6P5D8 | 538  | DK(*)NTLFTR(*)                      | K2  | 13    | 1000   | -         | -        | 1.348314  | 607       |
| Smchd1    | Q6P5D8 | 1558 | GFNEEDTDTPLFIGK(*)VR(*)             | K15 | 10.56 | 1000   | 1.1505376 | -        | -         |           |
| Smchd1    | Q6P5D8 | 1093 | IK(*)VNWTPPEVNK(*)                  | K2  | 9.29  | 123.21 | 0.7311827 | -        | -         |           |
| Uggt1     | Q6P5E4 | 362  | AITK(*)TAVSAQLR(*)                  | K4  | 78.63 | 1000   | 0.84      | 0.898734 | 0.865168  | 0.8679676 |



|         |        |      |                                 |     |       |        |          |            |          |           |
|---------|--------|------|---------------------------------|-----|-------|--------|----------|------------|----------|-----------|
| Uggt1   | Q6P5E4 | 972  | IEYQFFEDK(*)HSAIK(*)            | K9  | 68.77 | 27.86  | 0.94     | 0.911392   | 1.022471 | 0.9579548 |
| Uggt1   | Q6P5E4 | 1280 | IMMLSVLK(*)NTK(*)               | K8  | 64.47 | 47.36  | 0.78     | 0.835443   | 0.898876 | 0.8381065 |
| Uggt1   | Q6P5E4 | 783  | QLLYDAIK(*)HQK(*)               | K8  | 57.83 | 53.53  | 0.82     | 0.632911   | 0.741573 | 0.7314948 |
| Uggt1   | Q6P5E4 | 356  | DISQNFPTK(*)AR(*)               | K9  | 50.27 | 1000   | -        | -          | 0.696629 | 213       |
| Uggt1   | Q6P5E4 | 1399 | FWK(*)SGYWASHLAGR(*)            | K3  | 36.24 | 1000   | 1.06     | -          | 1.011235 | 1.035618  |
| Uggt1   | Q6P5E4 | 731  | GK(*)TAAIANSMNYLTK(*)           | K2  | 32.54 | 212.95 | 1.11     | -          | 1.112359 | 1.1111798 |
| Uggt1   | Q6P5E4 | 930  | IK(*)SHIQQLR(*)                 | K2  | 31.32 | 1000   | -        | 0.987341   | 0.910112 | 0.9487271 |
| Uggt1   | Q6P5E4 | 1027 | VFMNC(+57.02)QSK(*)LSDMPLK(*)   | K8  | 19.86 | 72.34  | -        | -          | 1.865168 | 539       |
| Uggt1   | Q6P5E4 | 1034 | LSDMPLK(*)SFYR(*)               | K7  | 19.3  | 1000   | -        | -          | 1.539325 | 843       |
| Uggt1   | Q6P5E4 | 222  | SNEGK(*)INYVFR(*)               | K5  | 16.89 | 1000   | -        | -          | 9.134831 | 461       |
| Xpo1    | Q6P5F9 | 693  | QLGSILK(*)TNVR(*)               | K7  | 89.77 | 1000   | 0.967391 | 31.15      | 0.925531 | 1.0143077 |
| Xpo1    | Q6P5F9 | 563  | FLK(*)TVV NK(*)                 | K3  | 74.18 | 105.53 | -        | 0.7875     | 0.882978 | 0.8352394 |
| Xpo1    | Q6P5F9 | 455  | DTDSINLYK(*)NMR(*)              | K9  | 66.07 | 1000   | -        | -          | 0.595744 | 681       |
| Xpo1    | Q6P5F9 | 415  | QLYLT VLSK(*)VR(*)              | K9  | 49.88 | 1000   | 0.760869 | 51.1       | 0.819148 | 0.8933395 |
| Ubxn7   | Q6P5G6 | 418  | LLALVK(*)H VQSK(*)              | K6  | 54.25 | 107.29 | 1        | -          | 1.010752 | 1.0053763 |
| Filip1l | Q6P6L0 | 667  | DK(*)AQFLSQELEHAK(*)            | K2  | 36.96 | 183.14 | -        | -          | 1.033707 | 865       |
| Senp6   | Q6P7W0 | 5    | A(+42.01)AGK(*)SGGSAGALFLK(*)   | K4  | 35.91 | 97.58  | -        | -          | -        | -         |
| Tatdn1  | Q6P8M1 | 27   | GVQK(*)HQDDLQDVIER(*)           | K4  | 57.55 | 1000   | 0.972972 | 90.422619  | 1.8125   | 1.069364  |
| Snx6    | Q6P8X1 | 386  | NLVELAELELK(*)HAK(*)            | K11 | 68.13 | 42.6   | 1.061855 | 60.0676056 | 1.197183 | 0.978365  |
| Snx6    | Q6P8X1 | 366  | QELIDFK(*)TR(*)                 | K7  | 67.87 | 1000   | 0.824742 | 20.0788732 | 1.267605 | 0.9603601 |
| Snx6    | Q6P8X1 | 276  | VSELF DK(*)TR(*)                | K7  | 66.34 | 1000   | 0.979381 | 41.1098591 | 1.154929 | 1.0776342 |
| Snx6    | Q6P8X1 | 386  | K(*)NLVELAELELK(*)HAK(*)        | K12 | 41.44 | 40.63  | -        | -          | 1.014084 | 507       |
| Snx6    | Q6P8X1 | 53   | FTVHTK(*)SSLPNFK(*)             | K6  | 32.53 | 93.6   | 1.113402 | 01.366197  | 1.225352 | 1.2349838 |
| Snx6    | Q6P8X1 | 193  | NMVK(*)SADGVIVSGVK(*)           | K4  | 21.38 | 73.38  | -        | 1.281690   | -        | -         |
| Kif15   | Q6P9L6 | 1170 | ASK(*)TSLQHLVTK(*)              | K3  | 36.93 | 124.12 | -        | -          | 0.670212 | 766       |
| Kif15   | Q6P9L6 | 1267 | MK(*)TNLEEVQSALHSK(*)           | K2  | 8.59  | 61.5   | 1.494382 | 01.116279  | 0.861702 | 1.1574544 |
| Fhod1   | Q6P9Q4 | 950  | SLAK(*)HELSPALR(*)              | K4  | 45.13 | 1000   | -        | 0.625      | 1.022988 | 0.8239943 |
| Oxsr1   | Q6P9R2 | 139  | EVLEGLEYLHK(*)NGQIHR(*)         | K11 | 40.26 | 1000   | 0.650485 | -          | -        | -         |
| Oxsr1   | Q6P9R2 | 114  | GEHK(*)SGVLDEPTIATILR(*)        | K4  | 37.27 | 1000   | -        | -          | 0.75     | -         |
| Dcaf13  | Q6PAC3 | 49   | ALNATK(*)LER(*)                 | K6  | 45.91 | 1000   | -        | 0.550561   | -        | -         |
| TxlNa   | Q6PAM1 | 240  | SK(*)LESLC(+57.02)R(*)          | K2  | 21.3  | 1000   | -        | -          | 1.186046 | 512       |
| TxlNa   | Q6PAM1 | 412  | SSEVFTTFK(*)QEMEK(*)            | K9  | 8.76  | 32.32  | -        | -          | 2.139534 | 884       |
| Gapvd1  | Q6PAR5 | 270  | FIGYLK(*)QNTYC(+57.02)FPHSLR(*) | K6  | 60.25 | 1000   | 0.786516 | -          | 0.965116 | 0.8758166 |
| Gapvd1  | Q6PAR5 | 1373 | DK(*)VQC(+57.02)ILR(*)          | K2  | 25.12 | 1000   | -        | -          | 1.395348 | 837       |

|          |        |      |                                    |     |       |        |           |          |             |           |
|----------|--------|------|------------------------------------|-----|-------|--------|-----------|----------|-------------|-----------|
| Herc4    | Q6PAV2 | 606  | VNEK(*)TGQLIQYDK(*)                | K4  | 14.44 | 106.84 | 1.3333333 | 1.428571 | -           | 1.3809524 |
| Lrpprc   | Q6PB66 | 452  | TK(*)NVQGIIDILK(*)                 | K2  | 61.08 | 228.69 | 0.7628865 | 0.649350 | 0.763440    | 0.725226  |
| Lrpprc   | Q6PB66 | 1345 | ALYEYLTAK(*)NLK(*)                 | K9  | 53.9  | 38.16  | 0.8453608 | 0.909090 | 0.741935    | 0.8321291 |
| Lrpprc   | Q6PB66 | 294  | VEK(*)SDHYFMDR(*)                  | K3  | 53.86 | 1000   | 0.8041237 | 0.987012 | 0.881720    | 0.8909524 |
| Lrpprc   | Q6PB66 | 1048 | SK(*)DAYNIFLK(*)                   | K2  | 48.76 | 197.82 | 0.7835051 | 0.948051 | 0.817204    | 0.8495871 |
| Lrpprc   | Q6PB66 | 101  | ITK(*)GLLQR(*)                     | K3  | 9.49  | 1000   | -         | -        | 1.086021    | 1.505     |
| Ints6    | Q6PCM2 | 831  | IFTLLK(*)HVQGSQTR(*)               | K6  | 34    | 1000   | -         | -        | 0.857142857 |           |
| Smarcc2  | Q6PDG5 | 694  | VASAAAK(*)SALEEFK(*)               | K7  | 70.09 | 117.11 | 1.1797752 | 0.871428 | 0.920454    | 0.9905528 |
| Smarcc2  | Q6PDG5 | 874  | AK(*)HLAAVEER(*)                   | K2  | 61.57 | 1000   | 1.0337078 | 1.242857 | 0.829545    | 1.0353702 |
| Smarcc2  | Q6PDG5 | 704  | MK(*)EEVPTALVEAHVR(*)              | K2  | 54.83 | 1000   | -         | -        | 0.840909091 |           |
| Smarcc2  | Q6PDG5 | 326  | K(*)GPSTPYTK(*)SK(*)               | K9  | 52.99 | 39.76  | -         | 0.771428 | 0.738636    | 0.7550325 |
| Smarcc2  | Q6PDG5 | 275  | ISAK(*)TLTDEVNSPDSR(*)R(*)         | K4  | 48.61 | 1000   | -         | 0.714285 | -           |           |
| Smarcc2  | Q6PDG5 | 75   | HVSNAPLTK(*)LPIK(*)                | K9  | 34.53 | 49.79  | -         | 1.5      | 1.011363    | 1.2556818 |
| Smarcc2  | Q6PDG5 | 101  | FK(*)SDQGWR(*)                     | K2  | 31.08 | 1000   | 1.3033707 | -        | 1.340909    | 1.3221399 |
| Smarcc2  | Q6PDG5 | 622  | DDWNK(*)VSEHVGSR(*)                | K5  | 25.41 | 1000   | 1.8876404 | 1.671428 | 1.272727    | 1.6105988 |
| Smarcc2  | Q6PDG5 | 275  | ISAK(*)TLTDEVNSPDSR(*)             | K4  | 17.19 | 1000   | -         | 1.685714 | -           |           |
| Phldb1   | Q6PDH0 | 1336 | SPNPALTFC(+57.02)VK(*)THDR(*)      | K11 | 19.89 | 1000   | -         | 1.210526 | -           |           |
| Ecpas    | Q6PDI5 | 1470 | YSPDVLK(*)NHAK(*)                  | K7  | 66.23 | 46.21  | 0.8367346 | 0.905405 | 0.797752    | 0.846631  |
| Ecpas    | Q6PDI5 | 1034 | VK(*)HEVSGETVVFGGGLGK(*)           | K2  | 47.05 | 116.26 | 0.6326530 | 0.459459 | 1.101123    | 0.7310787 |
| Ecpas    | Q6PDI5 | 1413 | NSVIQK(*)SC(+57.02)AFAMGHLVR(*)    | K6  | 24.28 | 1000   | 1.1224489 | -        | 0.640449    | 0.8814492 |
| Ecpas    | Q6PDI5 | 689  | FVDK(*)TEWIK(*)                    | K4  | 10.91 | 73.54  | -         | -        | 0.640449    | 0.438     |
| Dync1li2 | Q6PDL0 | 73   | TTLMTK(*)LQGAEHGK(*)               | K6  | 52.91 | 118.18 | 1.1604938 | 0.695652 | 1.135802    | 0.9973162 |
| Dync1li2 | Q6PDL0 | 278  | EEK(*)NLDLLYK(*)                   | K3  | 41.08 | 90.54  | -         | 0.768115 | -           |           |
| Dync1li2 | Q6PDL0 | 55   | LPSGK(*)NILVFGEDGSGK(*)            | K5  | 29.06 | 71.31  | 0.8888888 | 1.579710 | 1.037037    | 1.1685454 |
| Msl1     | Q6PDM1 | 78   | LK(*)EPGPPLASSQGGSPSPSPAGC(+57.02) | K27 | 81.38 | 113.22 | -         | -        | -           |           |
| Msl1     | Q6PDM1 | 78   | EPGPPLASSQGGSPSPSPAGC(+57.02)      | K25 | 53.75 | 1000   | -         | -        | -           |           |
| Msl1     | Q6PDM1 | 78   | GPPLASSQGGSPSPSPAGC(+57.02)        | K23 | 6.81  | 1000   | -         | -        | -           |           |
| Srsf1    | Q6PDM2 | 48   | DIDLK(*)NR(*)                      | K5  | 57.45 | 1000   | 0.6770833 | 1.148148 | 0.932584    | 0.9192719 |
| Chd4     | Q6PDQ2 | 1199 | PGLGSK(*)TGSMK(*)                  | K6  | 76.41 | 102.87 | -         | 0.64     | 0.892473    | 0.7662366 |
| Chd4     | Q6PDQ2 | 1781 | GNFLEIK(*)NK(*)                    | K7  | 75.6  | 36.05  | 0.7789473 | 0.573333 | 0.784946    | 0.712409  |
| Chd4     | Q6PDQ2 | 962  | NMPSK(*)TELIVR(*)                  | K5  | 73.75 | 1000   | 0.8315789 | 0.8      | 0.870967    | 0.8341822 |
| Chd4     | Q6PDQ2 | 957  | ADVFK(*)NMPSK(*)                   | K5  | 62.42 | 87.95  | 0.6947368 | 0.466666 | 0.913978    | 0.691794  |
| Chd4     | Q6PDQ2 | 952  | LK(*)ADVFK(*)                      | K2  | 15.63 | 90.87  | 0.7684210 | -        | -           |           |
| Snrrnp40 | Q6PE01 | 287  | IFQGNVHNFEK(*)NLLR(*)              | K11 | 75.28 | 1000   | 1.0689655 | 0.833333 | 0.956989    | 0.953096  |

|          |        |      |                                |     |       |        |           |          |                    |
|----------|--------|------|--------------------------------|-----|-------|--------|-----------|----------|--------------------|
| Mob4     | Q6PEB6 | 70   | ILEPPEGQDEGVWK(*)YEHLR(*)      | K14 | 23.05 | 1000   | -         | -        | 1.151162791        |
| Mapre3   | Q6PER3 | 76   | LEHEYIHNFK(*)VLQAAFK(*)        | K10 | 26.71 | 43.57  | -         | -        | 0.961038961        |
| Pik3c3   | Q6PF93 | 753  | HLDNLLLTk(*)TGK(*)             | K9  | 18.7  | 24.24  | -         | 1.105882 | -                  |
| Nup98    | Q6PFD9 | 1721 | IQQVDC(+57.02)SGYEHLHTK(*)V    | K17 | 54.76 | 1000   | -         | -        | 0.958762887        |
| Nup98    | Q6PFD9 | 1039 | LPISASHSSK(*)SR(*)             | K10 | 11.93 | 1000   | -         | -        | 1.237113402        |
| Rad54b   | Q6PFE3 | 13   | SAAPSQVQGK(*)SFK(*)            | K10 | 33.24 | 40.63  | -         | -        | -                  |
| Naa50    | Q6PGB6 | 34   | R(*)LNQVIFPVSYNDK(*)FYK(*)     | K14 | 88.92 | 77.24  | 1.0425531 | 1.075949 | - 1.0592513        |
| Naa50    | Q6PGB6 | 37   | FYK(*)DVLEVGEKAK(*)            | K3  | 60.92 | 197.65 | -         | 0.822784 | 0.872340 0.8475626 |
| Naa50    | Q6PGB6 | 34   | LNQVIFPVSYNDK(*)FYK(*)         | K13 | 60.24 | 30.72  | 0.9148936 | 1.075949 | 0.904255 0.9650328 |
| Naa50    | Q6PGB6 | 152  | IEPADAHVLQK(*)NLK(*)           | K11 | 58.26 | 32.97  | -         | -        | 0.872340426        |
| Dhx29    | Q6PGC1 | 1231 | IMC(+57.02)TK(*)SVDVTEK(*)     | K5  | 28.61 | 67.13  | 1.2710280 | -        | -                  |
| Bud31    | Q6PGH1 | 125  | SK(*)LEVGR(*)                  | K2  | 10.28 | 1000   | -         | 0.8125   | -                  |
| Jpt2     | Q6PGH2 | 11   | M(+42.01)FQGADSQAGK(*)SGSR(*)  | K11 | 91.53 | 1000   | 0.9673913 | 0.959459 | 1 0.9756169        |
| Jpt2     | Q6PGH2 | 124  | DHVLK(+57.02)EGEDSK(*)SDLK(*)  | K12 | 89.25 | 49.79  | 7.9456521 | 1.067567 | 1.185185 3.3994683 |
| Jpt2     | Q6PGH2 | 67   | R(*)TNPPGGK(*)GSGIFDESTPVQTR(  | K8  | 76.83 | 1000   | 0.6521739 | -        | 0.666666 0.6594203 |
| Jpt2     | Q6PGH2 | 67   | TNPPGGK(*)GSGIFDESTPVQTR(*)    | K7  | 73.58 | 1000   | -         | 1.094594 | -                  |
| Jpt2     | Q6PGH2 | 90   | LNPPGGK(*)TSDIFGSPVTATAPLAHP   | K7  | 70.98 | 161.47 | 0.8586956 | 0.729729 | 0.802469 0.7969648 |
| Jpt2     | Q6PGH2 | 55   | MASNIFGPTTEPK(*)NIPK(*)        | K13 | 24.67 | 33.81  | 1.3586956 | 1.594594 | - 1.4766451        |
| Washc2   | Q6PGL7 | 72   | QVDGLIQETK(*)ATHC(+57.02)R(*)  | K10 | 14.23 | 1000   | -         | -        | 1.253012048        |
| Rab35    | Q6PHN9 | 121  | ILVGNK(*)NDDPER(*)             | K6  | 36.61 | 1000   | 0.6868686 | 1.012048 | 1.096774 0.931897  |
| Camk2d   | Q6PHZ2 | 268  | ITASEALK(*)HPWIC(+57.02)QR(*)  | K8  | 78.77 | 1000   | 1.1234567 | 1.032258 | 1.109756 1.0884903 |
| Camk2d   | Q6PHZ2 | 69   | LLK(*)HPNIVR(*)                | K3  | 43.43 | 1000   | 1.1975308 | -        | 0.975609 1.0865703 |
| Camk2d   | Q6PHZ2 | 318  | NFSAAK(*)SLLK(*)               | K6  | 26.89 | 24.67  | -         | -        | 0.890243902        |
| Nudcd1   | Q6PIP5 | 220  | K(*)YEITK(*)HHVLR(*)           | K6  | 56.24 | 53.92  | 0.3636363 | 0.7      | 0.861702 0.6417795 |
| Nudcd1   | Q6PIP5 | 220  | YEITK(*)HHVLR(*)               | K5  | 22.26 | 1000   | 1.5151515 | -        | 1.159574 1.337363  |
| Rif1     | Q6PR54 | 262  | LLGK(*)TLHR(*)                 | K4  | 41.86 | 1000   | -         | -        | 2.341176471        |
| Rif1     | Q6PR54 | 244  | NK(*)NETYVLK(*)                | K2  | 33.91 | 104.64 | -         | -        | 0.647058824        |
| Rictor   | Q6QI06 | 124  | LK(*)VDYLIAR(*)                | K2  | 29.05 | 1000   | 0.3084577 | -        | 0.696428 0.5024431 |
| Ranbp10  | Q6VN19 | 293  | MTETPIQEEQASIK(*)NR(*)         | K14 | 75.73 | 1000   | -         | 0.420454 | 0.402173 0.4113142 |
| Ubr2     | Q6WKZ8 | 48   | EVYQHLAHC(+57.02)VPK(*)IYC(+57 | K12 | 49.78 | 1000   | 0.7010309 | -        | 0.802197 0.7516144 |
| Ubr2     | Q6WKZ8 | 450  | AFMDHLK(*)HR(*)                | K7  | 43.08 | 1000   | -         | -        | 1.923076923        |
| Arhgap10 | Q6Y5D8 | 147  | NYSLIDK(*)HLTLAR(*)            | K7  | 33.38 | 1000   | 0.4808743 | 2.015873 | 1.219047 1.2385983 |
| Jade1    | Q6ZPIO | 303  | MEPITK(*)VSHIPSSR(*)           | K6  | 66.18 | 1000   | -         | -        | -                  |
| Ube2o    | Q6ZPJ3 | 212  | VYDLK(*)NQILK(*)               | K5  | 54.39 | 116.54 | 1.1190476 | 0.944444 | 0.846153 0.969882  |

|        |        |      |                                       |     |       |        |           |          |          |           |
|--------|--------|------|---------------------------------------|-----|-------|--------|-----------|----------|----------|-----------|
| Smpd4  | Q6ZPR5 | 460  | TDLVSPK(*)NALMVFR(*)                  | K7  | 57.05 | 1000   | 0.5394736 | 0.392857 | 0.876404 | 0.6029118 |
| Kifbp  | Q6ZPU9 | 507  | INSLNK(*)SALK(*)                      | K6  | 19.65 | 33.65  | 1.0340909 | -        | 0.8875   | 0.9607955 |
| Kdm3b  | Q6ZPY7 | 1512 | VAEDFVSPEHVK(*)HC(+57.02)FR(*)        | K12 | 49.78 | 1000   | 0.7164179 | -        | 0.881818 | 0.799118  |
| Zc3h4  | Q6ZPZ3 | 1160 | TPNAGGK(*)TAEPASDTSAQPK(*)            | K7  | 75.9  | 107.72 | 1.1046511 | 0.539473 | 0.846153 | 0.8300929 |
| Fnbp4  | Q6ZQ03 | 294  | TTAASSSK(*)SGPVITK(*)                 | K8  | 19.92 | 128.65 | -         | 0.958333 | 1.385542 | 1.1719378 |
| Cnot1  | Q6ZQ08 | 1947 | LIALLVK(*)HSGEATNTVTK(*)              | K7  | 62.51 | 40.85  | -         | 0.902439 | -        | -         |
| Cnot1  | Q6ZQ08 | 1958 | HSGEATNTVTK(*)INLLNK(*)               | K11 | 27.48 | 72.73  | 0.8152173 | -        | 1.212765 | 1.0139917 |
| Cnot1  | Q6ZQ08 | 1889 | VGQMHQQGILK(*)TDDLITR(*)              | K11 | 26.06 | 1000   | 1.1086956 | -        | -        | -         |
| Cand1  | Q6ZQ38 | 971  | LK(*)GYLISGSSYAR(*)                   | K2  | 89.3  | 1000   | 0.9791666 | 0.975    | 0.956989 | 0.9703853 |
| Cand1  | Q6ZQ38 | 620  | LK(*)NEITR(*)                         | K2  | 82.56 | 1000   | 0.8645833 | 0.825    | 0.913978 | 0.8678539 |
| Cand1  | Q6ZQ38 | 1072 | EVEMGPFK(*)HTVDDGLDIR(*)              | K8  | 72.34 | 1000   | 1         | 0.9375   | 0.892473 | 0.9433244 |
| Cand1  | Q6ZQ38 | 826  | EGPAVVGQFIQDVK(*)NSR(*)               | K14 | 55.66 | 1000   | 0.6979166 | 1.6625   | 0.978494 | 1.1129704 |
| Cand1  | Q6ZQ38 | 577  | LK(*)AADIDQEVK(*)                     | K2  | 19.98 | 136.44 | 0.9479166 | 0.7875   | 1.526881 | 1.0874328 |
| Cand1  | Q6ZQ38 | 1057 | DLLDSVLPHLYNETK(*)VR(*)               | K15 | 13.57 | 1000   | -         | -        | 1.860215 | 0.54      |
| Larp1  | Q6ZQ58 | 980  | AK(*)NLDIDPK(*)                       | K2  | 8.66  | 161.52 | 4.2954545 | 5.540540 | 4.376344 | 4.7374464 |
| Cand2  | Q6ZQ73 | 1076 | EVEMGPFK(*)HTVDDGLDVR(*)              | K8  | 39.83 | 1000   | -         | -        | 0.785714 | 0.286     |
| Usp34  | Q6ZQ93 | 419  | LSTQHIDC(+57.02)IWAAAQLK(*)HC         | K16 | 28.06 | 1000   | -         | -        | 0.924050 | 0.633     |
| Usp34  | Q6ZQ93 | 3142 | LIGGK(*)SNIR(*)PPR(*)PELNMC(+57.02)HC | K5  | 19.72 | 48.48  | 1.3578947 | -        | 1.291139 | 1.324517  |
| Usp34  | Q6ZQ93 | 1971 | HK(*)TTLLELQK(*)                      | K2  | 6.27  | 89.48  | 0.8421052 | -        | 0.873417 | 0.8577615 |
| Topbp1 | Q6ZQF0 | 472  | SGSFSK(*)SALVPAER(*)                  | K6  | 5.25  | 1000   | -         | -        | 0.533333 | 0.333     |
| Jade2  | Q6ZQF7 | 38   | LPSSTK(*)SGWPR(*)                     | K6  | 99.29 | 1000   | -         | -        | -        | -         |
| Jade2  | Q6ZQF7 | 38   | C(+57.02)SK(*)LPSSTK(*)SGWPR(*)       | K9  | 75.53 | 1000   | -         | -        | -        | -         |
| Jade2  | Q6ZQF7 | 32   | C(+57.02)SK(*)LPSSTK(*)SGWPR(*)       | K3  | 75.53 | 1000   | -         | -        | -        | -         |
| Jade2  | Q6ZQF7 | 298  | MEPITK(*)ISHIPASR(*)                  | K6  | 72.78 | 1000   | -         | -        | -        | -         |
| Jade2  | Q6ZQF7 | 38   | SSTK(*)SGWPR(*)                       | K4  | 46.67 | 1000   | -         | -        | -        | -         |
| Nup188 | Q6ZQH8 | 908  | LQSK(*)IEDMR(*)                       | K4  | 56.75 | 1000   | 0.8932038 | 1.133333 | 0.969072 | 0.9985365 |
| Acap2  | Q6ZQK5 | 282  | ASNAFK(*)TWNR(*)                      | K6  | 35    | 1000   | -         | -        | 0.776315 | 0.789     |
| Acap2  | Q6ZQK5 | 319  | LC(+57.02)TVK(*)HC(+57.02)EDIER       | K5  | 29.01 | 1000   | 1.175     | 1.253012 | 0.789473 | 1.0724952 |
| Acap2  | Q6ZQK5 | 450  | SLGVHFSK(*)VR(*)                      | K8  | 13.62 | 1000   | 1.35      | -        | -        | -         |
| Wdr43  | Q6ZQL4 | 483  | VLQTK(*)NVNLIK(*)                     | K5  | 74.06 | 109.28 | 0.7448979 | 1.219512 | 0.811320 | 0.9252436 |
| Rps9   | Q6ZWN5 | 155  | LDSQK(*)HIDFSLR(*)                    | K5  | 95.25 | 1000   | 0.9255319 | 0.783132 | 0.936170 | 0.8816116 |
| Rps9   | Q6ZWN5 | 121  | LGLAK(*)SIHHAR(*)                     | K5  | 91.92 | 1000   | 0.8936170 | 0.879518 | 0.914893 | 0.8960096 |
| Rps9   | Q6ZWN5 | 93   | MK(*)LDYILGLK(*)                      | K2  | 83.86 | 144.73 | 0.8617021 | 0.951807 | 1        | 0.9378365 |
| Spcs3  | Q6ZWQ7 | 49   | IMLK(*)NVEDFTGPR(*)                   | K4  | 78.04 | 1000   | 0.84      | 0.8      | 1.091954 | 0.9106513 |

|          |         |      |                                      |     |       |        |           |          |             |            |
|----------|---------|------|--------------------------------------|-----|-------|--------|-----------|----------|-------------|------------|
| Rpl10    | Q6Z WV3 | 78   | Y MVK(*) SC(+57.02) GK(*)            | K4  | 94.53 | 72.09  | 0.9270833 | 0.848101 | 0.967391    | 0.914192   |
| Rpl10    | Q6Z WV3 | 82   | SC(+57.02) GK(*) DGFHIR(*)           | K4  | 73.19 | 1000   | 0.8958333 | 0.784810 | 1.173913    | 0.9515188  |
| Rpl10    | Q6Z WV3 | 13   | YC(+57.02) K(*) NK(*) PYPK(*)        | K3  | 57.29 | 52.04  | 0.7604166 | -        | 0.804347    | 0.7823822  |
| Rpl35    | Q6Z WV7 | 97   | LTK(*) HEEK(*)                       | K3  | 87.96 | 88.98  | 0.9393939 | -        | -           |            |
| Rpl35    | Q6Z WV7 | 14   | K(*) K(*) EELLK(*)                   | K2  | 12.18 | 1000   | 0.9090909 | 0.752577 | -           | 0.8308341  |
| Rpl35    | Q6Z WV7 | 79   | YK(*) PLDLR(*) PK(*)                 | K2  | 10.66 | 79.54  | 0.7070707 | -        | -           |            |
| Ppp2r1a  | Q76 MZ3 | 542  | FNVAK(*) SLQK(*)                     | K5  | 87.02 | 72.65  | 0.9555555 | 0.917808 | 0.964285    | 0.9458832  |
| Ppp2r1a  | Q76 MZ3 | 475  | FGK(*) EWAHATIIPK(*)                 | K3  | 66.97 | 235.31 | 1.1222222 | 0.958904 | 0.940476    | 1.0072008  |
| Ppp2r1a  | Q76 MZ3 | 280  | AVGPEITK(*) TDLVPAFQNL M(+15.9       | K8  | 30.11 | 85.25  | -         | -        | 0.642857    | 1.143      |
| Ppp2r1a  | Q76 MZ3 | 163  | VSSAVK(*) AELR(*)                    | K6  | 26.98 | 1000   | 1.1222222 | 1.136986 | 0.964285    | 1.0744981  |
| Ppp2r1a  | Q76 MZ3 | 188  | AAASK(*) LGEFAK(*)                   | K5  | 15.73 | 66.56  | -         | -        | 1.25        |            |
| Stambpl1 | Q76 N33 | 122  | TDELK(*) TDLLR(*)                    | K5  | 3.79  | 1000   | -         | -        | 0.416666667 |            |
| Snd1     | Q78 PY7 | 886  | VITEYLNAQESAK(*) SAR(*)              | K13 | 87.05 | 1000   | 0.8947368 | 1        | 0.967391    | 0.9540427  |
| Snd1     | Q78 PY7 | 758  | VESPAK(*) VHFYIDYGNR(*)              | K6  | 68.15 | 1000   | 0.9684210 | 0.683544 | 0.956521    | 0.8694957  |
| Snd1     | Q78 PY7 | 93   | LIGK(*) EV C(+57.02) FTIENK(*)       | K4  | 67.38 | 225.26 | -         | -        | 0.923913    | 0.3043     |
| Snd1     | Q78 PY7 | 366  | LNSGDYK(*) TIHLSSIR(*) PPR(*)        | K7  | 49.63 | 1000   | 0.6947368 | -        | 0.891304    | 0.7930206  |
| Snd1     | Q78 PY7 | 515  | AK(*) QFLPFLQR(*)                    | K2  | 31.1  | 1000   | 1.0736842 | 1.240506 | 0.858695    | 1.0576287  |
| Snd1     | Q78 PY7 | 586  | TK(*) ELVLQR(*)                      | K2  | 23.4  | 1000   | 0.8736842 | -        | 0.902173    | 0.8879291  |
| Znrd1    | Q791 N7 | 53   | VVK(*) TSVVFNK(*)                    | K3  | 46.62 | 128.65 | 0.3313253 | -        | 0.291666    | 0.311496   |
| Mtch2    | Q791 V5 | 293  | VPC(+57.02) GK(*) TYC(+57.02) YDLF   | K5  | 29.5  | 1000   | -         | -        | 0.95        |            |
| Mtch2    | Q791 V5 | 293  | K(*) VPC(+57.02) GK(*) TYC(+57.02) Y | K6  | 16.9  | 45.16  | -         | 2.487804 | 1.81        | 2.1489024  |
| Picalm   | Q7 M6Y3 | 24   | ITAAQHSVTGSAVSK(*) TVC(+57.02) K     | K15 | 37.86 | 38.03  | 0.8775510 | 0.92     | 1.056179    | 0.9512436  |
| Cyfp1    | Q7 TMB8 | 182  | C(+57.02) SVK(*) NDHSAYK(*)          | K4  | 76.74 | 163.4  | -         | 0.95     | 1.045454    | 0.9977273  |
| Cyfp1    | Q7 TMB8 | 778  | YK(*) SLELAIGR(*)                    | K2  | 64.26 | 1000   | -         | -        | 1.306818    | 1.182      |
| Cyfp1    | Q7 TMB8 | 1188 | VQK(*) HDGK(*) DEIIK(*)              | K3  | 64.25 | 55.36  | 0.8494623 | 0.8      | 0.931818    | 0.8604268  |
| Cyfp1    | Q7 TMB8 | 260  | MYLTPSEK(*) HMLLK(*)                 | K8  | 51.87 | 65.71  | 0.7741935 | 0.7625   | 0.965909    | 0.8342009  |
| Cyfp1    | Q7 TMB8 | 320  | YIK(*) TSAHYEENK(*)                  | K3  | 36.52 | 178.84 | 1.0322580 | -        | 1.147727    | 1.10899927 |
| Cyfp1    | Q7 TMB8 | 294  | INLSK(*) IDK(*)                      | K5  | 20.44 | 32.69  | 0.7526881 | -        | 0.943181    | 0.847935   |
| Cyfp1    | Q7 TMB8 | 1227 | YLK(*) SGDGESTPVEHVR(*)              | K3  | 10.29 | 1000   | -         | -        | 1.477272    | 1.727      |
| Syncrip  | Q7 TMK9 | 100  | SAFLC(+57.02) GVMK(*) TYR(*)         | K9  | 92.44 | 1000   | 0.6979166 | 0.740259 | 0.956043    | 0.7980735  |
| Syncrip  | Q7 TMK9 | 256  | TK(*) EQILEEFSK(*)                   | K2  | 80.62 | 222.06 | 0.75      | 0.844155 | 0.923076    | 0.8390776  |
| Syncrip  | Q7 TMK9 | 297  | GFC(+57.02) FLEYEDHK(*) TAAQAR(*)    | K11 | 79.21 | 1000   | 0.7291666 | 0.701298 | 1.010989    | 0.8138181  |
| Syncrip  | Q7 TMK9 | 252  | LFVGSIPK(*) SK(*)                    | K8  | 72.06 | 27.16  | 0.8645833 | 0.779220 | 0.901098    | 0.848301   |
| Syncrip  | Q7 TMK9 | 91   | DSDL SHVQNK(*) SAFLC(+57.02) GVM     | K10 | 63.36 | 159.26 | 0.84375   | 0.948051 | 1.010989    | 0.9342637  |



|         |        |      |                                           |     |       |        |           |          |             |           |
|---------|--------|------|-------------------------------------------|-----|-------|--------|-----------|----------|-------------|-----------|
| Syncrip | Q7TMK9 | 338  | VK(*)VLFVR(*)                             | K2  | 46.87 | 1000   | 2.1770833 | 0.662337 | 1.351648    | 1.3970231 |
| Syncrip | Q7TMK9 | 371  | LK(*)DYAFIHFDER(*)                        | K2  | 45.49 | 1000   | 0.7708333 | -        | 0.505494    | 0.6381639 |
| Syncrip | Q7TMK9 | 232  | SGK(*)HIGVC(+57.02)ISVANNR(*)             | K3  | 41.94 | 1000   | 1.0104166 | 0.974025 | 1.032967    | 1.0058032 |
| Syncrip | Q7TMK9 | 363  | SFSQFGK(*)LER(*)                          | K7  | 12.17 | 1000   | 3.5520833 | -        | -           | -         |
| Prcp    | Q7TMR0 | 477  | LLEVK(*)HMK(*)                            | K5  | 64.57 | 68.47  | 1.2395833 | 0.898989 | -           | 1.0692866 |
| Prcp    | Q7TMR0 | 75   | YLVADK(*)HWQR(*)                          | K6  | 58.58 | 1000   | 0.9583333 | 0.767676 | 0.968085    | 0.8980317 |
| Shq1    | Q7TMX5 | 357  | ILQLGK(*)SAVLK(*)                         | K6  | 24.68 | 64.28  | 0.5763888 | 0.390532 | 0.745762    | 0.5708947 |
| Thoc7   | Q7TMY4 | 32   | INLLVK(*)SFIK(*)                          | K6  | 65.3  | 46.21  | 0.9292929 | 0.768292 | 0.843137    | 0.8469076 |
| Huwe1   | Q7TMY8 | 2267 | IVNQPSLFGSK(*)SASSK(*)                    | K12 | 89.46 | 46.62  | 0.9690721 | 1.075    | 1.054945    | 1.0330057 |
| Huwe1   | Q7TMY8 | 674  | HQPTLK(*)TDATTAIK(*)                      | K6  | 52.41 | 58.98  | 0.6494845 | 0.6625   | 0.857142    | 0.7230425 |
| Huwe1   | Q7TMY8 | 4142 | HILGK(*)SVR(*)                            | K5  | 52.07 | 1000   | 0.7835051 | -        | -           | -         |
| Huwe1   | Q7TMY8 | 4137 | SFYK(*)HILGK(*)                           | K4  | 51.01 | 61.3   | 0.9381443 | 1.825    | 1.153846    | 1.3056635 |
| Huwe1   | Q7TMY8 | 1254 | AAFTC(+57.02)IK(*)NLWNR(*)                | K7  | 50.43 | 1000   | -         | -        | 1.21978022  | -         |
| Huwe1   | Q7TMY8 | 1799 | YAMMF AELK(*)STR(*)                       | K9  | 15.93 | 1000   | 34.505154 | -        | -           | -         |
| Casd1   | Q7TN73 | 117  | EEGNK(*)HENIPFEDK(*)                      | K5  | 40.02 | 27.52  | -         | -        | -           | -         |
| Luc7l2  | Q7TNC4 | 37   | VC(+57.02)K(*)SHLLNC(+57.02)C(+57.02)K(*) | K3  | 76.87 | 1000   | -         | -        | 1.186813187 | -         |
| Luc7l2  | Q7TNC4 | 61   | MDLGEC(+57.02)LK(*)VHDLALR(*)             | K8  | 18.23 | 1000   | -         | -        | 1.648351648 | -         |
| Spag7   | Q7TNE3 | 187  | DAAHMLQANK(*)TYGC(+57.02)VPV K10          | K10 | 43.3  | 213.35 | -         | -        | 0.846153846 | -         |
| Dek     | Q7TNV0 | 372  | K(*)DFIK(*)TTVK(*)                        | K5  | 26.82 | 55.36  | 1         | 1.269230 | 0.977011    | 1.0820808 |
| Ints3   | Q7TPD0 | 881  | HWC(+57.02)MK(*)HDELLAEHIK(*)             | K5  | 52.99 | 168.06 | 0.9680851 | 0.986486 | 0.876190    | 0.9435874 |
| Ints3   | Q7TPD0 | 896  | ALLIK(*)NNSLPR(*)                         | K5  | 38.37 | 1000   | -         | -        | 0.619047619 | -         |
| Fbxo11  | Q7TPD1 | 119  | TAC(+57.02)PTK(*)SSMEGASTSTTEN            | K6  | 19.1  | 1000   | -         | 1.198581 | -           | -         |
| Prrc2b  | Q7TPM1 | 50   | HGLQSLGK(*)VATAR(*)                       | K8  | 37.01 | 1000   | 0.6725663 | -        | -           | -         |
| Actn1   | Q7TPR4 | 95   | ISNVNK(*)ALDFIASK(*)                      | K6  | 75.89 | 161.77 | 0.8958333 | 0.833333 | 0.923076    | 0.8840812 |
| Actn1   | Q7TPR4 | 676  | QYEK(*)SIVNYK(*)PK(*)                     | K4  | 63.62 | 90.16  | 0.8020833 | 0.923076 | 0.835164    | 0.8534417 |
| Actn1   | Q7TPR4 | 162  | TAPYK(*)NVNIQNFHISWK(*)                   | K5  | 53.97 | 71.31  | 0.875     | 0.743589 | 1.142857    | 0.9204823 |
| Actn1   | Q7TPR4 | 741  | DAK(*)GISQEQMNEFR(*)                      | K3  | 36.67 | 1000   | 0.90625   | 1.410256 | 0.901098    | 1.0725351 |
| Actn1   | Q7TPR4 | 413  | ASIHEAWTDGK(*)EAMLR(*)                    | K11 | 34.42 | 1000   | 1.2083333 | -        | 1.978021    | 1.5931777 |
| Actn1   | Q7TPR4 | 402  | QK(*)ASIHEAWTDGK(*)                       | K2  | 25.14 | 223.6  | 0.9375    | 1.461538 | 1.120879    | 1.1733059 |
| Actn1   | Q7TPR4 | 684  | PK(*)IDQLEC(+57.02)DHQLIQEALIF            | K2  | 11.65 | 38.52  | -         | -        | 1.098901099 | -         |
| Mybbp1a | Q7TPV4 | 874  | QEQLLHK(*)TAR(*)                          | K8  | 89.94 | 1000   | -         | 115.6625 | 2.089887    | 58.876194 |
| Mybbp1a | Q7TPV4 | 496  | ATPQIPETK(*)QHFSPLDDR(*)                  | K9  | 84.51 | 1000   | 0.8125    | 0.7125   | 0.955056    | 0.8266854 |
| Mybbp1a | Q7TPV4 | 1005 | YPVIC(+57.02)K(*)NLLPVLAQHVAG             | K6  | 78.53 | 1000   | 0.7395833 | 0.65     | 0.955056    | 0.7815465 |
| Mybbp1a | Q7TPV4 | 866  | GSTK(*)QEQLLHK(*)                         | K4  | 69.79 | 193.63 | -         | 0.975    | 1.337078    | 1.1560393 |



|         |        |      |                                  |     |       |        |           |          |          |           |
|---------|--------|------|----------------------------------|-----|-------|--------|-----------|----------|----------|-----------|
| Mybbp1a | Q7TPV4 | 162  | SVQLLK(*)ILSQHPNHLQGQPIK(*)      | K6  | 62.3  | 145.13 | 0.78125   | 0.95     | 1.044943 | 0.9253979 |
| Mybbp1a | Q7TPV4 | 484  | FC(+57.02)LFHAFFK(*)TK(*)        | K9  | 55.62 | 25.66  | -         | 0.575    | 1.247191 | 0.9110955 |
| Mybbp1a | Q7TPV4 | 9    | SPTK(*)AEPATPAEAAQSDR(*)         | K4  | 53.32 | 1000   | 1.0833333 | 0.4125   | 0.595505 | 0.697113  |
| Mybbp1a | Q7TPV4 | 1186 | LK(*)SEGTTPEK(*)                 | K2  | 52.7  | 101.72 | 0.8958333 | 0.85     | 1.033707 | 0.9265137 |
| Mybbp1a | Q7TPV4 | 1005 | YPVIC(+57.02)K(*)NLLPVLAQHVAG    | K6  | 42.74 | 1000   | 0.6979166 | -        | 1.033707 | 0.8658123 |
| Mybbp1a | Q7TPV4 | 124  | YSLQAMNK(*)AMMR(*)               | K8  | 29.25 | 1000   | 1.0104166 | -        | 0.977528 | 0.9939724 |
| Mybbp1a | Q7TPV4 | 156  | MK(*)SVQLLK(*)                   | K2  | 28.65 | 139.02 | -         | 1.175    | 0.977528 | 1.076264  |
| Mybbp1a | Q7TPV4 | 537  | QTPDLAENGK(*)PWTYR(*)            | K10 | 27.44 | 1000   | 1.3333333 | -        | 0.707865 | 1.0205993 |
| Mybbp1a | Q7TPV4 | 156  | EALMK(*)SVQLLK(*)                | K5  | 27.36 | 70.1   | -         | 0.8      | -        | -         |
| Mybbp1a | Q7TPV4 | 1033 | HQAQAC(+57.02)LMLQK(*)TLSAR(*)   | K11 | 21.66 | 1000   | 0.8541666 | -        | -        | -         |
| Mybbp1a | Q7TPV4 | 484  | HAFK(*)TK(*)                     | K5  | 11.7  | 39.76  | 0.7291666 | -        | 0.898876 | 0.8140215 |
| Aptx    | Q7TQC5 | 225  | VVTSEHLELLK(*)HMHAVEGK(*)        | K11 | 41.67 | 29.7   | -         | -        | -        | -         |
| Atxn2l  | Q7TQH0 | 138  | VK(*)NGTTYEGIFK(*)               | K2  | 37.86 | 103.28 | -         | -        | 1.452380 | 0.952     |
| Atxn2l  | Q7TQH0 | 324  | IAMENDDGR(*)TEEEK(*)HSAVQR(*)    | K14 | 33.59 | 1000   | 0.8222222 | 0.935064 | -        | 0.8786436 |
| Ccdc93  | Q7TQK5 | 167  | AVK(*)TVVGLSDAYK(*)JPR(*)        | K3  | 23.07 | 147.32 | -         | 1.357142 | 0.858823 | 1.1079832 |
| Ccdc93  | Q7TQK5 | 331  | SK(*)HLEELQANHTSLK(*)            | K2  | 11.38 | 25.98  | 0.8272727 | -        | -        | -         |
| Prcc2a  | Q7TSC1 | 29   | GK(*)SLEIQK(*)PAVAPR(*)          | K2  | 51.91 | 104.48 | 1.1978021 | 1.033333 | 1.560975 | 1.264037  |
| Prcc2a  | Q7TSC1 | 49   | HGLQSLGK(*)VAIAR(*)              | K8  | 17.32 | 1000   | 2.2087912 | -        | -        | -         |
| Prcc2a  | Q7TSC1 | 140  | R(*)PPTAPENTPSVPSGVK(*)SWAQA     | K17 | 15.13 | 1000   | -         | -        | 1.195121 | 0.951     |
| Scaf4   | Q7TSH6 | 41   | LYK(*)HVVQIVEK(*)                | K3  | 43.68 | 242.89 | 0.5268817 | 0.906666 | 1.132743 | 0.8554306 |
| Atf7ip  | Q7TT18 | 378  | DSC(+57.02)DEGNK(*)VNSNVVEK(*)   | K8  | 34.4  | 118.18 | -         | -        | 2.461538 | 0.462     |
| Atf7ip  | Q7TT18 | 33   | VK(*)GELLR(*)ADGK(*)             | K2  | 1.59  | 100.79 | 0         | -        | 0        | 0         |
| Ahcyl1  | Q80SW1 | 108  | GSSNFC(+57.02)VK(*)NIK(*)        | K8  | 81.78 | 68.47  | 0.6       | 0.614457 | 1.059523 | 0.7579939 |
| Ahcyl1  | Q80SW1 | 478  | YK(*)QDVYLLPK(*)                 | K2  | 73.14 | 217.23 | 1.1052631 | 1.084337 | 1.035714 | 1.0751049 |
| Ahcyl1  | Q80SW1 | 524  | NGPFK(*)PNYYR(*)                 | K5  | 46.6  | 1000   | 0.8421052 | 0.867469 | 1.190476 | 0.9666838 |
| Ahcyl1  | Q80SW1 | 389  | MK(*)NSC(+57.02)IVC(+57.02)NMC   | K2  | 44.85 | 1000   | 0.8947368 | -        | 1.071428 | 0.9830827 |
| Ahcyl1  | Q80SW1 | 286  | QK(*)FDNLYC(+57.02)C(+57.02)R(*) | K2  | 5.31  | 1000   | -         | -        | 2.702380 | 0.952     |
| Gng5    | Q80SZ7 | 27   | VK(*)VSQAAADLK(*)                | K2  | 31.04 | 91.09  | -         | 0.892307 | 0.723684 | 0.807996  |
| Selenoi | Q80TA1 | 247  | SYK(*)SNTLK(*)                   | K3  | 67.24 | 65.44  | 0.9595959 | 1.079207 | 1.184210 | 1.0743381 |
| Nisch   | Q80TM9 | 48   | VIQVTDGNHEWTIK(*)HR(*)           | K14 | 6.87  | 1000   | -         | 0.957264 | -        | -         |
| Ubr5    | Q80TP3 | 657  | EVVFVEDVK(*)NVPVGK(*)            | K9  | 19.92 | 41.94  | -         | -        | 0.879518 | 0.072     |
| Ubr5    | Q80TP3 | 1242 | TLIAGQK(*)SAR(*)                 | K7  | 7.86  | 1000   | -         | -        | 1.084337 | 0.349     |
| Ubr5    | Q80TP3 | 755  | GVHAVLK(*)TGSWVR(*)              | K7  | 4.68  | 1000   | -         | -        | 3.168674 | 0.699     |
| Clasp1  | Q80TV8 | 335  | EILSDDK(*)HDWEQR(*)              | K7  | 31.87 | 1000   | 0.9603960 | 1.688311 | 0.989247 | 1.2126517 |

|          |        |      |                                    |     |       |        |           |          |                    |
|----------|--------|------|------------------------------------|-----|-------|--------|-----------|----------|--------------------|
| Clasp1   | Q80TV8 | 1032 | IITWTTEPK(*)SSDVR(*)               | K9  | 29.36 | 1000   | 0.8712871 | -        | -                  |
| Clasp1   | Q80TV8 | 1079 | LLHNHLK(*)NSSNTGVGSPSNTIGR(*)      | K7  | 12.38 | 1000   | -         | -        | 1.47311828         |
| Rere     | Q80TZ9 | 569  | EEDDGLSGK(*)HSMR(*)                | K9  | 28.37 | 1000   | -         | -        | -                  |
| Pja2     | Q80U04 | 46   | HAYVSFK(*)PC(+57.02)MTR(*)         | K7  | 78.17 | 1000   | -         | 1.090909 | 1.053333;1.0721212 |
| Pum2     | Q80U58 | 1038 | YTYGK(*)HILAK(*)                   | K5  | 47.03 | 95.62  | 0.7878787 | 1.347222 | 1.033898;1.0563331 |
| Suz12    | Q80U70 | 5    | APQK(*)HGGGGGGGSGPSAGSGGG          | K4  | 73.39 | 24.3   | 0.7821782 | -        | -                  |
| Suz12    | Q80U70 | 467  | LYSLLK(*)HLK(*)                    | K6  | 36.79 | 49.37  | 0.8415841 | 1.063291 | 0.941860;0.9489119 |
| Septin9  | Q80UG5 | 69   | FQDLGVK(*)NSEPAAR(*)               | K7  | 59.78 | 1000   | 1.0105263 | 0.6125   | 0.879120;0.8340491 |
| Septin9  | Q80UG5 | 341  | TIEIK(*)SITHDIEEK(*)               | K5  | 36.93 | 119.03 | 1.2947368 | -        | 0.461538;0.8781377 |
| Septin9  | Q80UG5 | 433  | LSK(*)VVNIVPIAK(*)                 | K3  | 32.75 | 160.24 | 0.8526315 | 0.9125   | 0.934065;0.8997325 |
| Septin9  | Q80UG5 | 336  | IPK(*)TIEIK(*)                     | K3  | 32.15 | 105.53 | 0.7052631 | 0.7875   | 0.868131;0.786965  |
| Sass6    | Q80UK7 | 404  | LK(*)NTVTIQEK(*)                   | K2  | 16.7  | 140.79 | -         | -        | -                  |
| Naa15    | Q80UM3 | 665  | FLTPLK(*)NLVK(*)                   | K6  | 92.73 | 35.82  | 0.6938775 | 0.701298 | 1.011904;0.8023603 |
| Naa15    | Q80UM3 | 734  | TVLK(*)QEMNR(*)                    | K4  | 60.39 | 1000   | 1.8877551 | -        | 1.583333;1.7355442 |
| Naa15    | Q80UM3 | 78   | NDLK(*)SHVC(+57.02)WHVYGLLQR       | K4  | 60.29 | 1000   | 1.3571428 | -        | 1.583333;1.4702381 |
| Naa15    | Q80UM3 | 747  | LFGATNPK(*)NFNETFLK(*)             | K8  | 53.8  | 161.77 | 0.8877551 | 0.753246 | 0.797619(0.8128736 |
| Naa15    | Q80UM3 | 320  | MNFSK(*)GC(+57.02)PPVFNTLR(*)      | K5  | 3.31  | 1000   | -         | -        | 1.30952381         |
| Taf1     | Q80UV9 | 565  | ILLGK(*)TGVIK(*)                   | K5  | 67.76 | 61.26  | -         | -        | -                  |
| Hs6st2   | Q80UW0 | 422  | VLLESAK(*)SNLK(*)                  | K7  | 23.85 | 20.17  | -         | -        | 0.413533835        |
| Fam98b   | Q80VD1 | 299  | TAC(+57.02)AINK(*)VLMGR(*)         | K7  | 58.89 | 1000   | 0.1122448 | 2        | 1.010869;1.0410382 |
| Fam98b   | Q80VD1 | 263  | YALSPK(*)TTVTLAHLAAR(*)            | K6  | 36.62 | 1000   | -         | -        | 0.782608696        |
| Trim56   | Q80VI1 | 110  | APGDVHSGK(*)PTC(+57.02)ALC(+57.02) | K21 | 46.94 | 54.4   | 0.9014084 | 1.830508 | -1.3659585         |
| Dnph1    | Q80VJ3 | 40   | YGK(*)VLTEHVADAELEPR(*)            | K3  | 24.64 | 1000   | -         | -        | 0.78021978         |
| Dhx33    | Q80VY9 | 387  | VSK(*)TQAWQR(*)                    | K3  | 23.67 | 1000   | -         | -        | -                  |
| Wipi2    | Q80W47 | 313  | LPFC(+57.02)GHK(*)NIC(+57.02)SL    | K7  | 68.22 | 55.39  | 0.8863636 | 0.666666 | 0.885057;0.8126959 |
| Zmpste24 | Q80W54 | 470  | LQALK(*)NAK(*)                     | K5  | 69.27 | 34.94  | 0.5742574 | -        | -                  |
| Zmpste24 | Q80W54 | 251  | SIDFPLTK(*)VYVVEGSK(*)             | K8  | 63.77 | 101.72 | -         | -        | 0.885416667        |
| Zmpste24 | Q80W54 | 429  | AK(*)DLYSALIK(*)                   | K2  | 11.01 | 145.97 | 1.0594059 | 1.417582 | 0.791666(1.0895517 |
| Kif20b   | Q80WE4 | 753  | TSSK(*)VDTSLSNK(*)                 | K4  | 17.59 | 66.54  | 1.4705882 | -        | 0.676691;1.07364   |
| Kif20b   | Q80WE4 | 1592 | MAVK(*)HPGC(+57.02)PTPVTIK(*)      | K4  | 5.81  | 26.12  | -         | -        | 1.210526316        |
| Mtdh     | Q80WJ7 | 194  | EVDEGAWETK(*)ISHR(*)               | K10 | 48.2  | 1000   | 1.9891304 | 0.619718 | 0.632183;1.0803442 |
| Mtdh     | Q80WJ7 | 247  | NK(*)GDShLNVQVSNFK(*)              | K2  | 26.56 | 61.5   | 0.9021739 | 1.126760 | 1.172413;1.0671161 |
| Vac14    | Q80WQ2 | 688  | LQLLDVK(*)NNPYLIK(*)               | K7  | 34.54 | 122.76 | -         | 1.158878 | 0.655462;0.9071703 |
|          | Q80X32 | 119  | AAGFK(*)TSPGR(*)PLGTTK(*)          | K5  | 6.63  | 44.44  | 0.9922480 | -        | 1.333333;1.1627907 |

|          |        |      |                                   |     |       |        |           |          |          |             |
|----------|--------|------|-----------------------------------|-----|-------|--------|-----------|----------|----------|-------------|
| Tmem106b | Q80X71 | 130  | YIGVK(*)SAYVSYDAEK(*)             | K5  | 88.94 | 189.31 | 0.7857142 | 0.679611 | 0.942528 | 0.8026182   |
| Sympk    | Q80X82 | 146  | VALQWMVK(*)SR(*)                  | K8  | 36.32 | 1000   | 0.4411764 | -        | 1.023529 | 0.7323529   |
| Mrps7    | Q80X85 | 150  | IFHEALK(*)NC(+57.02)EPVIGLVPIK    | K7  | 41.68 | 143.78 | 1.0851063 | -        | 0.783505 | 0.9343058   |
| Flnb     | Q80X90 | 2530 | AFVGQK(*)SSFLVDC(+57.02)SK(*)     | K6  | 96.35 | 199.69 | 0.9157894 | 0.896103 | 0.922222 | 0.9113719   |
| Flnb     | Q80X90 | 1345 | EAFTNK(*)SNVFTVVTR(*)             | K6  | 91.36 | 1000   | 1.0315789 | 1.090909 | 0.944444 | 1.0223108   |
| Flnb     | Q80X90 | 2566 | HVGK(*)QQYNVTYVVK(*)              | K4  | 80.66 | 187.48 | 0.9789473 | 0.974025 | 0.955555 | 0.9695096   |
| Flnb     | Q80X90 | 1510 | VK(*)VLPDYDASK(*)                 | K2  | 77.85 | 161.68 | 1.1157894 | 1.064935 | 0.833333 | 1.004686    |
| Flnb     | Q80X90 | 1897 | YNDK(*)HIPGSPFTAK(*)              | K4  | 77.07 | 101.25 | 1.2105263 | 0.909090 | 0.9      | 1.0065391   |
| Flnb     | Q80X90 | 313  | NK(*)TYSVEYLPK(*)                 | K2  | 73.93 | 154.91 | 0.9052631 | 0.922077 | 0.877777 | 0.9017063   |
| Flnb     | Q80X90 | 1584 | DGTYAVTYIPDK(*)TGR(*)             | K12 | 65.03 | 1000   | 0.9578947 | 0.857142 | 1.011111 | 0.9420496   |
| Flnb     | Q80X90 | 349  | SPFEVNVDK(*)AQGDASK(*)            | K9  | 60.94 | 51.59  | -         | -        | 0.777777 | 0.7777778   |
| Flnb     | Q80X90 | 2507 | SSTETC(+57.02)YSAIPK(*)SSSDASK(*) | K12 | 60.64 | 55.73  | 0.7789473 | 0.740259 | -        | 0.7596036   |
| Flnb     | Q80X90 | 1449 | TVDSSK(*)AGLAPLEVR(*)             | K6  | 53.64 | 1000   | 0.9789473 | 1.571428 | 0.9      | 1.1501253   |
| Flnb     | Q80X90 | 715  | AIK(*)HTIAVVWGGVNIPHSPYR(*)       | K3  | 51.32 | 1000   | 0.9263157 | -        | 1.011111 | 0.9687135   |
| Flnb     | Q80X90 | 1241 | AFGPGIEGK(*)DVFR(*)               | K9  | 50.74 | 1000   | -         | 0.818181 | -        | -           |
| Flnb     | Q80X90 | 476  | ETADFK(*)VDTK(*)                  | K6  | 48.51 | 38.26  | 1.1473684 | 0.610389 | -        | 0.878879    |
| Flnb     | Q80X90 | 2524 | GAGLSK(*)AFVGQK(*)                | K6  | 47.51 | 129.72 | 0.7052631 | 1.441558 | 0.955555 | 1.0341257   |
| Flnb     | Q80X90 | 65   | MHHK(*)YHQR(*)                    | K4  | 40.7  | 1000   | 0.9368421 | 1.194805 | 1        | 1.0438824   |
| Flnb     | Q80X90 | 838  | VK(*)VDP SHDASK(*)                | K2  | 24.25 | 181.07 | 1.6947368 | -        | -        | -           |
| Flnb     | Q80X90 | 2195 | GQHVTGSPFQFTVGPLGEGGAHK(*)        | K23 | 16.5  | 1000   | 3.2210526 | -        | 1.466666 | 2.3438596   |
| Flnb     | Q80X90 | 2372 | FNGSHVVGSPFK(*)VR(*)              | K12 | 13.1  | 1000   | 0.2       | 0.402597 | -        | 0.3012987   |
| Flnb     | Q80X90 | 746  | VK(*)VFGPGVER(*)                  | K2  | 12.17 | 1000   | -         | -        | 1.344444 | 1.344444444 |
| Flnb     | Q80X90 | 2342 | VHSPSGAVEEC(+57.02)HVSELEPDK      | K20 | 11.21 | 1000   | 1.4842105 | -        | 1.688888 | 1.5865497   |
| Flnb     | Q80X90 | 948  | IK(*)INGLENR(*)                   | K2  | 8.37  | 1000   | -         | -        | 1.777777 | 1.777777778 |
| Rraga    | Q80X95 | 307  | VDGPK(*)HSLLMR(*)                 | K5  | 34.5  | 1000   | 1.2298850 | 0.962025 | 1.230769 | 1.1408932   |
| Trmt61a  | Q80XC2 | 57   | PFGSK(*)VIC(+57.02)SR(*)          | K5  | 72.03 | 1000   | 0.9111111 | 1        | 0.77     | 0.8937037   |
| Pip4k2b  | Q80XI4 | 150  | FVIK(*)TVSSEDVAEMHNILK(*)         | K4  | 58.65 | 170.25 | 1.3098591 | 1.218390 | 0.775700 | 1.101317    |
| Pip4k2b  | Q80XI4 | 388  | TVK(*)HGAGAEISTVNPEQYSK(*)        | K3  | 41.26 | 102.18 | 0.9436619 | -        | 0.635514 | 0.789588    |
| Pip4k2b  | Q80XI4 | 78   | IK(*)VDNHLFNK(*)                  | K2  | 13.94 | 131.72 | -         | -        | 0.934579 | 0.934579439 |
| Fam76b   | Q80XP8 | 312  | ETVEQLQAK(*)NR(*)                 | K9  | 38.06 | 1000   | -         | -        | -        | -           |
| Fam76b   | Q80XP8 | 52   | SEFQQESK(*)TNTIC(+57.02)K(*)      | K8  | 18.42 | 129.15 | -         | -        | -        | -           |
| Elac2    | Q80Y81 | 642  | HC(+57.02)K(*)HAFGC(+57.02)ALV    | K3  | 68.89 | 213.97 | 0.8118811 | 0.913043 | 1.081395 | 0.93544     |
| Kdm5b    | Q80Y84 | 832  | SGGGK(*)SQNQLTVNELR(*)            | K5  | 28.74 | 1000   | -         | -        | -        | -           |
| Znf598   | Q80YR4 | 236  | EK(*)HFLC(+57.02)EEGR(*)          | K2  | 35.3  | 1000   | -         | 0.953125 | -        | -           |

|          |        |      |                                |     |       |        |           |          |                    |
|----------|--------|------|--------------------------------|-----|-------|--------|-----------|----------|--------------------|
| Tnc      | Q80YX1 | 2056 | GAFWYK(*)NC(+57.02)HR(*)       | K6  | 24.35 | 1000   | -         | -        | -                  |
| Mrps10   | Q80ZK0 | 81   | FTLLK(*)SVHIFK(*)              | K5  | 42.19 | 121.92 | 0.3270142 | 0.712962 | 0.920454;0.6534772 |
| Abitram  | Q80ZQ9 | 43   | GK(*)PC(+57.02)EDHC(+57.02)ILQ | K2  | 38.08 | 1000   | -         | -        | 0.91025641         |
| Rnaseh2b | Q80ZV0 | 301  | SIDAFFGAK(*)NK(*)              | K9  | 70.02 | 22.85  | 1.2769230 | 1.196969 | 1.179487;1.2177933 |
| Ddx42    | Q810A7 | 298  | DMIGIAK(*)TGSGK(*)             | K7  | 54.19 | 38.32  | -         | -        | 0.568421053        |
| Ddx42    | Q810A7 | 50   | LPQQSHSAFGAASSSSGFGK(*)SAPPC   | K20 | 45.52 | 28.74  | -         | -        | 0.631578947        |
| Ankfy1   | Q810B6 | 11   | LEK(*)HLMLLR(*)                | K3  | 46.62 | 1000   | -         | 1.181818 | 0.868131;1.024975  |
| Ankfy1   | Q810B6 | 217  | SK(*)TEYPLHK(*)                | K2  | 43.32 | 122.76 | 0.6979166 | 3.337662 | 0.802197;1.6125923 |
| Ankfy1   | Q810B6 | 937  | VNELTK(*)HR(*)                 | K6  | 42.44 | 1000   | 1.8958333 | 1.727272 | 1.483516;1.7022075 |
| Ankfy1   | Q810B6 | 279  | R(*)LESIATTLVSHK(*)ADVDMVDK(*) | K13 | 28.46 | 32.94  | 0.9375    | -        | -                  |
| Grwd1    | Q810D6 | 341  | QFK(*)SGSPVATFK(*)             | K3  | 56.5  | 85.33  | 0.8235294 | 0.808219 | 0.810526;0.8140916 |
| Wdr82    | Q8BFQ4 | 280  | VAVLDGK(*)HTGPITC(+57.02)LQFN  | K7  | 51.19 | 116.1  | 1.4       | 0.690476 | 1.522727;1.2044012 |
| Wdr82    | Q8BFQ4 | 84   | YTHAANTVVYSSNK(*)IDDTIR(*)     | K14 | 35.3  | 1000   | -         | -        | 1.034090909        |
| Klhl42   | Q8BFQ9 | 333  | GK(*)IYVIGGYTTR(*)             | K2  | 35.89 | 1000   | 5.6521739 | 0.207865 | -2.9300195         |
| Gns      | Q8BFR4 | 258  | NFNIHGTNK(*)HWLIR(*)           | K9  | 78.2  | 1000   | 1.0957446 | 0.825    | 0.944444;0.955063  |
| Tufm     | Q8BFR5 | 70   | DK(*)PHVNVGTIGHVDHGK(*)TTLTA   | K17 | 52.27 | 40.16  | 1         | -        | 1.136842;1.0684211 |
| Tufm     | Q8BFR5 | 234  | DPELGVK(*)SVQK(*)              | K7  | 32.19 | 38.26  | -         | 0.743243 | 1.052631;0.8979374 |
| Zfand1   | Q8BFR6 | 39   | SK(*)DSHGC(+57.02)SEVNVVK(*)   | K2  | 7.6   | 73.35  | -         | -        | 5.847826087        |
| Haus4    | Q8BFT2 | 257  | LQTK(*)SELDL(*)                | K4  | 79.58 | 1000   | -         | 0.988636 | -                  |
| Pcid2    | Q8BFV2 | 133  | SK(*)VGDMLEK(*)                | K2  | 96.87 | 161.52 | 1         | 1.068493 | 0.815533;0.9613424 |
| Pcid2    | Q8BFV2 | 32   | DGASC(+57.02)AELVSFK(*)HPHVAN  | K12 | 34.5  | 1000   | 1.0927835 | 0.917808 | -1.0052959         |
| Lpp      | Q8BFW7 | 109  | VQQGNPGGK(*)TLEER(*)           | K9  | 54.9  | 1000   | 0.9204545 | 0.716216 | 0.894117;0.8435961 |
| Lpp      | Q8BFW7 | 10   | S(+42.01)HPSWLPPK(*)STGEPLGH   | K9  | 25.02 | 1000   | -         | -        | 0.682352941        |
| Lpp      | Q8BFW7 | 494  | ATGK(*)AYHPHC(+57.02)FTC(+57.0 | K4  | 10.93 | 1000   | -         | -        | 1.517647059        |
| Pimreg   | Q8BFY7 | 88   | SAK(*)SALGAMSQR(*)             | K3  | 56.85 | 1000   | -         | 0.618421 | 3.086956;1.8526888 |
| Tnpo1    | Q8BFY9 | 869  | ILHGFK(*)NQVGDENWR(*)          | K6  | 91.96 | 1000   | 0.9361702 | 0.768292 | 0.955555;0.8866728 |
| Tnpo1    | Q8BFY9 | 81   | SLSGLILK(*)NNVK(*)             | K8  | 82.02 | 62.23  | 0.7872340 | 0.853658 | 0.888888;0.8432605 |
| Tnpo1    | Q8BFY9 | 66   | LK(*)SEDEPTR(*)                | K2  | 69.05 | 1000   | 0.8510638 | 0.768292 | 0.966666;0.8620077 |
| Tnpo1    | Q8BFY9 | 192  | FLQFFK(*)HSSPK(*)              | K6  | 53.53 | 100.21 | 0.9787234 | 1.024390 | 0.944444;0.9825194 |
| Tnpo1    | Q8BFY9 | 863  | DMFC(+57.02)K(*)ILHGFK(*)      | K5  | 41.66 | 143.14 | -         | -        | 0.877777778        |
| Hnrnpa3  | Q8BG05 | 57   | EHFEK(*)WGTLTDC(+57.02)VVMR    | K5  | 79.24 | 1000   | 0.9387755 | 0.8375   | 0.920454;0.89891   |
| Hnrnpa3  | Q8BG05 | 151  | YGK(*)IETIEVMEDR(*)            | K3  | 62.29 | 1000   | 0.7755102 | 0.825    | 0.920454;0.8403216 |
| Hnrnpa3  | Q8BG05 | 348  | YGPMK(*)GGSFGGR(*)             | K5  | 60.01 | 1000   | 0.8061224 | -        | -                  |
| Psm11    | Q8BG32 | 358  | LSK(*)ADVER(*)                 | K3  | 79.65 | 1000   | 1.0625    | 0.822784 | 0.877777;0.9210209 |

|         |        |     |                                 |     |       |        |           |           |           |           |
|---------|--------|-----|---------------------------------|-----|-------|--------|-----------|-----------|-----------|-----------|
| Rhot1   | Q8BG51 | 166 | NLK(*)NISELFYYAQK(*)            | K3  | 37.74 | 235.98 | 1.4444444 | -         | 1.142857  | 1.2936508 |
| Poldip3 | Q8BG81 | 403 | ALFK(*)SSGASVTTQPTEFK(*)        | K4  | 64.2  | 232.92 | 0.3292682 | 0.378787  | 0.8333333 | 0.5137965 |
| Poldip3 | Q8BG81 | 147 | LTK(*)TIQVPQQK(*)               | K3  | 22.53 | 150.89 | 0.6951219 | 1.272727  | -         | 0.9839246 |
| Eif4b   | Q8BGD9 | 529 | DGNK(*)VDVVGATQQQAGSC(+57.0     | K4  | 79.38 | 1000   | 5.1954022 | 3.68      | 0.942528  | 3.2726437 |
| Eif4b   | Q8BGD9 | 194 | DSDK(*)TDTDWR(*)                | K4  | 55.63 | 1000   | 0.8045977 | 0.7733333 | 1.068965  | 0.8822989 |
| Samm50  | Q8BGH2 | 74  | AK(*)NLIIEVMR(*)                | K2  | 70.2  | 1000   | 0.9222222 | 0.8       | 1.093023  | 0.9384152 |
| Aars    | Q8BGQ7 | 558 | VDDSSEDK(*)TEFTVK(*)            | K8  | 88.29 | 104.62 | -         | 17.62025  | 17.01098  | 17.315621 |
| Aars    | Q8BGQ7 | 879 | LFK(*)THSPQTSAMLFTVDNEAGK(*)    | K3  | 71.39 | 280.15 | 0.9684210 | 0.962025  | 0.956043  | 0.9621634 |
| Aars    | Q8BGQ7 | 625 | SVLGEADQK(*)GSLVAPDR(*)         | K9  | 66.35 | 1000   | 0.8105263 | 0.721518  | 1.098901  | 0.8769821 |
| Aars    | Q8BGQ7 | 81  | AGGK(*)HNDLDDVGK(*)             | K4  | 59.1  | 225.98 | 1.0210526 | 0.936708  | 0.989010  | 0.9822575 |
| Aars    | Q8BGQ7 | 451 | LAQLK(*)SQGK(*)                 | K5  | 58.42 | 48.12  | 0.8105263 | -         | 0.791208  | 0.8008676 |
| Aars    | Q8BGQ7 | 564 | VDDSSEDK(*)TEFTVK(*)NAQVR(*)    | K14 | 47.84 | 112.31 | 0.8210526 | 1.493670  | 0.747252  | 1.0206588 |
| Ublcp1  | Q8BGR9 | 33  | QFLK(*)TLTGVLPER(*)             | K4  | 35.51 | 1000   | -         | -         | 0.9878048 | 0.78      |
| Bola2   | Q8BGS2 | 47  | FEGK(*)PLLQR(*)                 | K4  | 12.41 | 1000   | -         | 0.879518  | -         | -         |
| Micall1 | Q8BGT6 | 739 | LIHEK(*)HLLVR(*)                | K5  | 13.91 | 1000   | 0.8897058 | 1.179245  | 1.414893  | 1.1612816 |
| Fto     | Q8BGW1 | 74  | EVPEAFLTLHK(*)HGC(+57.02)LFR(*) | K11 | 59.21 | 1000   | 0.8454545 | 0.948979  | 1.025974  | 0.9401361 |
| Eif5a2  | Q8BGY2 | 47  | IVEM(+15.99)STSK(*)TGK(*)       | K8  | 96.32 | 47.36  | -         | -         | 0.9555555 | 0.56      |
| Eif5a2  | Q8BGY2 | 55  | AK(*)VHLVGIDIFTGK(*)            | K2  | 68.34 | 323.97 | -         | -         | 0.8111111 | 0.11      |
| Cdc23   | Q8BGZ4 | 147 | GQVK(*)NEALR(*)                 | K4  | 60.76 | 1000   | 0.63      | 0.528089  | -         | 0.5790449 |
| Pck2    | Q8BH04 | 90  | YK(*)NC(+57.02)WLAR(*)          | K2  | 83.86 | 1000   | 0.9191919 | 0.828947  | 1.054347  | 0.9341624 |
| Pck2    | Q8BH04 | 108 | VESK(*)TVIVTPSQR(*)             | K4  | 62.73 | 1000   | 0.8484848 | 0.605263  | 0.967391  | 0.8070464 |
| Pck2    | Q8BH04 | 491 | GK(*)TIMHDPFAMR(*)              | K2  | 55.88 | 1000   | 1.0404040 | 0.881578  | 0.913043  | 0.9450088 |
| Pck2    | Q8BH04 | 522 | YLEHWLSMEGQK(*)GAR(*)           | K12 | 16.66 | 1000   | -         | -         | 3.597826  | 0.087     |
| Wdr48   | Q8BH57 | 657 | TVK(*)HFIWK(*)                  | K3  | 29.21 | 142.99 | -         | -         | 1.809523  | 0.81      |
| Tipr1   | Q8BH58 | 207 | LYHEADK(*)TYMLR(*)              | K7  | 58.06 | 1000   | 1.0322580 | 0.784946  | 0.912621  | 0.9099419 |
| Ehd2    | Q8BH64 | 220 | VVLNK(*)ADMVETQQLMR(*)          | K5  | 67.29 | 1000   | 0.9166666 | 0.763157  | 1.022988  | 0.9009377 |
| Ehd2    | Q8BH64 | 32  | TK(*)LLPLEEHYR(*)               | K2  | 34.38 | 1000   | -         | -         | 0.919540  | 0.23      |
| Ehd2    | Q8BH64 | 473 | AK(*)TWMVGTK(*)                 | K2  | 25.84 | 61.82  | 0.9285714 | -         | -         | -         |
| Sephs1  | Q8BH69 | 16  | ESFNPETYELDK(*)SFR(*)           | K12 | 40.67 | 1000   | -         | -         | 0.816091  | 0.954     |
| Sephs1  | Q8BH69 | 32  | GTGC(+57.02)K(*)VPQDVLQK(*)     | K5  | 38.09 | 150.89 | 0.8476190 | 1.386666  | 1.034482  | 1.0895895 |
| Nup107  | Q8BH74 | 409 | IWK(*)ISC(+57.02)WR(*)          | K3  | 29.26 | 1000   | -         | -         | 0.858695  | 0.652     |
| Echs1   | Q8BH95 | 185 | AVGK(*)SLAMEMVLTGDR(*)          | K4  | 58.79 | 1000   | -         | -         | 0.816091  | 0.954     |
| Wdr3    | Q8BHB4 | 5   | GLTK(*)QYLR(*)                  | K4  | 50.42 | 1000   | -         | -         | 1         | -         |
| Wdr3    | Q8BHB4 | 365 | IK(*)SFDLIHSPQGELK(*)           | K2  | 42.91 | 86.39  | 0.6153846 | 1.397435  | 0.576086  | 0.8629692 |



|          |        |      |                                 |     |       |        |           |          |          |           |
|----------|--------|------|---------------------------------|-----|-------|--------|-----------|----------|----------|-----------|
| Wdr3     | Q8BHB4 | 289  | VVNLAVDK(*)TGR(*)               | K8  | 34.73 | 1000   | 0.4903846 | -        | 0.597826 | 0.5441054 |
| Dcakd    | Q8BHC4 | 128  | YMK(*)HTVVVYC(+57.02)DR(*)      | K3  | 43.88 | 1000   | 1.3943661 | 0.934210 | 0.97     | 1.0995256 |
| Ptbp3    | Q8BHD7 | 402  | ATLSK(*)HQAVQLPR(*)             | K5  | 27.2  | 1000   | 1.7739130 | 3.424242 | 0.798076 | 1.9987441 |
| Ptbp3    | Q8BHD7 | 108  | ELK(*)TDNLPNQAR(*)              | K3  | 25.01 | 1000   | 0.7652173 | 0.616161 | -        | 0.6906895 |
| Maip1    | Q8BHE8 | 276  | EFTQGVK(*)PDWTIAR(*)            | K7  | 12.64 | 1000   | 1.1891891 | -        | -        |           |
| Nrdc     | Q8BHG1 | 966  | TK(*)QTLGYHVYPTC(+57.02)R(*)    | K2  | 38.9  | 1000   | -         | -        | 1.191011 | 1.236     |
| Nrdc     | Q8BHG1 | 1076 | SFSK(*)SDLVSWFK(*)              | K4  | 34.82 | 131.72 | 1.3541666 | -        | 1.134831 | 1.2444991 |
| Nrdc     | Q8BHG1 | 1084 | SDLVSWFK(*)AHR(*)               | K8  | 34.26 | 1000   | 0.875     | 1.220779 | 0.820224 | 0.9720013 |
| Nrdc     | Q8BHG1 | 891  | YVVDK(*)LNFAPLER(*)             | K5  | 8.49  | 1000   | -         | -        | 1.674157 | 1.303     |
| Slu7     | Q8BHJ9 | 288  | NLDPNSAYDPK(*)TR(*)             | K12 | 5.75  | 1000   | -         | -        | 0.756097 | 1.561     |
| Ercc6l   | Q8BHK9 | 624  | YFTK(*)QELK(*)                  | K4  | 27    | 34.3   | -         | -        | 1        |           |
| Ganab    | Q8BHN3 | 491  | NHGLYVK(*)TR(*)                 | K7  | 82.57 | 1000   | 0.9892473 | 0.870129 | 1.033333 | 0.9642368 |
| Ganab    | Q8BHN3 | 39   | SNFK(*)TC(+57.02)DESSFC(+57.02) | K4  | 73.83 | 189.7  | 0.9032258 | 0.987012 | 1        | 0.9634129 |
| Ganab    | Q8BHN3 | 908  | PAAVVLQTK(*)GSPEsr(*)           | K9  | 68.76 | 1000   | 0.7956989 | 0.597402 | 0.977777 | 0.7902931 |
| Ganab    | Q8BHN3 | 269  | LK(*)VTEGGEpyr(*)               | K2  | 68.08 | 1000   | -         | 0.727272 | 0.744444 | 0.7358586 |
| Noc4l    | Q8BHY2 | 120  | ELALK(*)TLMK(*)                 | K5  | 20.94 | 63.97  | 0.8064516 | 0.927536 | 0.905263 | 0.8797503 |
| Cdkn2aip | Q8BI72 | 142  | AVEGK(*)NNSSVER(*)              | K5  | 46.24 | 1000   | 1.0695652 | 0.741176 | 0.916666 | 0.9091361 |
| Cdkn2aip | Q8BI72 | 428  | LYK(*)TVAWK(*)                  | K3  | 20.21 | 58     | 0.7391304 | 0.764705 | 0.958333 | 0.8207232 |
| Cdkn2aip | Q8BI72 | 367  | STAQVAASLLATK(*)SGASLGVSQLA     | K13 | 19.31 | 146.73 | -         | -        | 1.385416 | 1.667     |
| Cdkn2aip | Q8BI72 | 30   | C(+57.02)EGETDK(*)HWR(*)        | K7  | 16.68 | 1000   | -         | -        | 1.40625  |           |
| Mia3     | Q8BI84 | 1615 | SFK(*)NQIAAHEK(*)               | K3  | 12.07 | 131.34 | -         | -        | 0.736263 | 1.376     |
| Comtd1   | Q8BIG7 | 227  | NK(*)TVEC(+57.02)VR(*)          | K2  | 22.76 | 1000   | -         | -        | 3.119047 | 1.619     |
| Iars2    | Q8BIJ6 | 451  | MLQATK(*)NVLK(*)                | K6  | 17.46 | 76.73  | 0.4946236 | -        | 0.791666 | 0.6431452 |
| Iars2    | Q8BIJ6 | 540  | TK(*)DEYLINSQTTEHIK(*)          | K2  | 10.99 | 93.17  | -         | -        | 1.708333 | 1.333     |
| Cstf2    | Q8BIQ5 | 189  | IVDPEIALK(*)ILHR(*)             | K9  | 33.92 | 1000   | 1.9036144 | -        | 1        | 1.4518072 |
| Zc3h14   | Q8BJ05 | 352  | QANK(*)NLILK(*)                 | K4  | 13.05 | 58     | -         | 0.590476 | -        |           |
| Nup93    | Q8BJ71 | 59   | TSQETADVK(*)ASVLLGSR(*)         | K9  | 59.16 | 1000   | 0.9569892 | -        | 1.086021 | 1.0215054 |
| Nup93    | Q8BJ71 | 611  | FTSDTK(*)PIINK(*)VASVAENK(*)    | K11 | 44.73 | 39.44  | 0.6881720 | -        | 0.827956 | 0.7580645 |
| Nup93    | Q8BJ71 | 633  | LYDLAK(*)NADK(*)                | K6  | 30.54 | 82.24  | 1.1935483 | 1.2375   | 0.741935 | 1.0576613 |
| Chmp2b   | Q8BJF9 | 81   | TFAVSSK(*)VTSMSTQTK(*)          | K7  | 45.64 | 123.34 | 0.7339449 | 0.574712 | 0.682692 | 0.6637833 |
| Chmp2b   | Q8BJF9 | 107  | MAGAMSTTAK(*)TMQAVNK(*)         | K10 | 41.06 | 89.98  | -         | 0.919540 | 0.865384 | 0.8924624 |
| Chmp2b   | Q8BJF9 | 90   | VTSMSTQTK(*)VMNSQMK(*)          | K9  | 40.98 | 67.33  | 0.7706422 | 0.620689 | -        | 0.6956659 |
| Tyw1     | Q8BJM7 | 385  | GGC(+57.02)YK(*)HTFYGIESHR(*)   | K5  | 32.43 | 1000   | -         | 0.568627 | 0.609929 | 0.5892783 |
| Sun2     | Q8BJS4 | 406  | VQQLK(*)TEWK(*)                 | K5  | 11.06 | 82.24  | -         | -        | 3.126213 | 1.592     |



|         |        |      |                                 |     |       |        |           |          |           |           |
|---------|--------|------|---------------------------------|-----|-------|--------|-----------|----------|-----------|-----------|
| Sgta    | Q8BJU0 | 161  | AIGIDPGYSK(*)AYGR(*)            | K10 | 79.84 | 1000   | 0.9484536 | 0.925925 | 0.791666  | 0.8886821 |
| Sgta    | Q8BJU0 | 96   | LK(*)TEGNEQMK(*)                | K2  | 79.19 | 183.32 | 0.8865979 | 0.740740 | 0.875     | 0.8341129 |
| Sgta    | Q8BJU0 | 197  | ALELDPDNDTYK(*)SNLK(*)          | K12 | 52.81 | 28.7   | 0.9278350 | 0.827160 | 0.552083  | 0.7690263 |
| Sgta    | Q8BJU0 | 175  | MGLALSSLNK(*)HAEAVAYYK(*)       | K10 | 38.57 | 20.18  | 1.0721649 | 1.111111 | 0.90625   | 1.029842  |
| Sgta    | Q8BJU0 | 175  | SSLNK(*)HAEAVAYYK(*)            | K5  | 24.26 | 90.94  | -         | -        | 0.5       |           |
| Nol11   | Q8BJW5 | 185  | LC(+57.02)K(*)SHSLSK(*)         | K3  | 12.28 | 104.48 | 1.25      | 1.535714 | -         | 1.3928571 |
| Eif2a   | Q8BJW6 | 223  | ADK(*)VTMLWNK(*)                | K3  | 68.66 | 184.45 | 0.9438202 | 0.797468 | 1.117647  | 0.9529785 |
| Eif2a   | Q8BJW6 | 121  | TGAC(+57.02)LK(*)SFIQK(*)       | K6  | 46.42 | 115.97 | 0.5842696 | -        | 1.164705  | 0.8744878 |
| Eif2a   | Q8BJW6 | 192  | VAVYVPGSK(*)GAPSFVR(*)          | K9  | 22.29 | 1000   | 0.8988764 | -        | 2.223529  | 1.5612029 |
| Eif2a   | Q8BJW6 | 216  | FAGPQAALANK(*)SFFK(*)           | K11 | 16.44 | 24.67  | 1.5056179 | -        | 1.470588  | 1.4881031 |
| Psm5    | Q8BJY1 | 351  | VGYQAK(*)NASTELK(*)             | K6  | 64.81 | 128.65 | 0.9191919 | 0.740740 | -         | 0.8299663 |
| Psm5    | Q8BJY1 | 147  | AAIK(*)JLSR(*)                  | K4  | 23.36 | 1000   | -         | -        | 0.2446808 | 0.51      |
| Psm5    | Q8BJY1 | 334  | QVLQK(*)TGTR(*)                 | K5  | 17.39 | 1000   | 0.6565656 | -        | 0.882978  | 0.7697722 |
| Mrps35  | Q8BJZ4 | 297  | LK(*)NEGENEASLAQYK(*)           | K2  | 47.05 | 244    | 0.5523809 | 0.263636 | 0.901960  | 0.5726594 |
| Csnk1a1 | Q8BK63 | 8    | A(+42.01)SSSGSK(*)AEFIVGGK(*)   | K7  | 85.41 | 148.75 | 1.0465116 | 1.026666 | 1.192307  | 1.0884953 |
| Csnk1a1 | Q8BK63 | 130  | IEYVHTK(*)NFIHR(*)              | K7  | 62.89 | 1000   | 0.9883720 | 0.68     | -         | 0.834186  |
| Csnk1a1 | Q8BK63 | 62   | HPQLLYESK(*)LYK(*)              | K9  | 56.54 | 53.53  | 0.9534883 | 0.84     | 1.115384  | 0.9696243 |
| Csnk1a1 | Q8BK63 | 65   | LYK(*)ILQGGVGIPHIR(*)           | K3  | 34.12 | 1000   | -         | -        | 1.0769230 | 0.77      |
| Ahsa1   | Q8BK64 | 94   | LNWTGTGSK(*)SGVQYK(*)           | K8  | 78.69 | 102.87 | 0.7977528 | 0.810126 | 0.820224  | 0.809368  |
| Ahsa1   | Q8BK64 | 273  | HIAMK(*)WR(*)                   | K5  | 24.84 | 1000   | -         | -        | 0.9775280 | 0.9       |
| Rcc2    | Q8BK67 | 75   | PATAGK(*)AAGAAAIITEPEHTK(*)     | K6  | 49.77 | 179.51 | 0.5543478 | 0.828947 | 0.532608  | 0.6386346 |
| Ipo5    | Q8BKC5 | 806  | LEEHLK(*)NQELR(*)               | K6  | 89.22 | 1000   | 1.2631578 | 1.075949 | 0.925531  | 1.0882131 |
| Ipo5    | Q8BKC5 | 1052 | IFSIIAEGEMHEAIK(*)HEDPC(+57.02  | K15 | 59.93 | 56.54  | 0.4631578 | 0.670886 | 1.053191  | 0.7290785 |
| Ipo5    | Q8BKC5 | 806  | AK(*)LEEHLK(*)NQELR(*)          | K8  | 58.89 | 111.2  | 1.9157894 | 1.341772 | 1.106382  | 1.4546482 |
| Ipo5    | Q8BKC5 | 556  | GK(*)TIEC(+57.02)ISLIGLAVGK(*)  | K2  | 57.45 | 314.84 | 0.9157894 | -        | 1.010638  | 0.9632139 |
| Ipo5    | Q8BKC5 | 963  | TK(*)ENVNATENC(+57.02)ISAVGK(*) | K2  | 49.41 | 241.23 | 1.1052631 | 1.886075 | 1.031914  | 1.3410847 |
| Ipo5    | Q8BKC5 | 800  | AK(*)LEEHLK(*)                  | K2  | 43.51 | 102.87 | 0.9684210 | -        | 1.563829  | 1.2661254 |
| Ipo5    | Q8BKC5 | 360  | IK(*)EHIMQMLQNPDWK(*)           | K2  | 37.21 | 191.64 | 1.2210526 | 2.215189 | 0.946808  | 1.461017  |
| Ipo5    | Q8BKC5 | 41   | SK(*)ITFLLQAIR(*)               | K2  | 33.77 | 1000   | 1.5473684 | -        | 0.914893  | 1.231131  |
| Ipo5    | Q8BKC5 | 1052 | SIIAEGEMHEAIK(*)HEDPC(+57.02)A  | K13 | 23.27 | 26.08  | -         | -        | 1.1382978 | 0.72      |
| Ipo5    | Q8BKC5 | 539  | LK(*)HIVENAVQK(*)               | K2  | 15.11 | 140.79 | -         | -        | 1.0957446 | 0.81      |
| Cyp20a1 | Q8BKE6 | 95   | QHFNPKN(*)TSDPFETMLK(*)         | K7  | 28.1  | 96.46  | 1.6704545 | -        | 0.894117  | 1.2822861 |
| Ptk7    | Q8BKG3 | 124  | WIEAGPVVLK(*)HPASEAIEQPQTQV     | K10 | 50.48 | 1000   | -         | -        | 1         |           |
| Pum3    | Q8BKS9 | 578  | EGC(+57.02)FAK(*)TLVER(*)       | K6  | 52.18 | 1000   | -         | 0.573170 | 0.5625    | 0.5678354 |

|          |        |      |                               |     |       |        |           |          |          |             |
|----------|--------|------|-------------------------------|-----|-------|--------|-----------|----------|----------|-------------|
| Pum3     | Q8BKS9 | 138  | AK(*)HIWESLR(*)               | K2  | 44.85 | 1000   | 0.9239130 | 0.536585 | 0.96875  | 0.8097495   |
| Pum3     | Q8BKS9 | 170  | IK(*)TIAFAHDSTR(*)            | K2  | 31.3  | 1000   | 0.5760869 | 0.951219 | 0.770833 | 0.7660466   |
| Pum3     | Q8BKS9 | 323  | EAVIK(*)HSLVHK(*)             | K5  | 25.06 | 102.87 | -         | -        | 1        |             |
| Pum3     | Q8BKS9 | 384  | K(*)VIVK(*)TMK(*)             | K5  | 8.73  | 50.22  | -         | 0.524390 | -        |             |
| Thoc5    | Q8BKT7 | 424  | K(*)TPNPANQYQFDK(*)VGILTLR(*) | K13 | 39.11 | 116.72 | 0.8316831 | 0.676767 | 0.842105 | 0.7835187   |
| Thoc5    | Q8BKT7 | 424  | TPNPANQYQFDK(*)VGILTLR(*)     | K12 | 11.3  | 1000   | -         | -        | 1.010526 | 1.010526316 |
| Smg1     | Q8BXX6 | 1796 | LLVK(*)HAGELR(*)              | K4  | 12.65 | 1000   | -         | -        | 0.842696 | 0.842696629 |
| Pdhx     | Q8BKZ9 | 194  | NILEK(*)HSLDASQGTATGPR(*)     | K5  | 72.34 | 1000   | 1.3333333 | 0.757142 | 0.892473 | 0.9943164   |
| Eea1     | Q8BL66 | 647  | AK(*)TELLLSAEAAK(*)           | K2  | 79    | 212.2  | 1.0638297 | 0.802631 | 0.833333 | 0.8999316   |
| Eea1     | Q8BL66 | 324  | DLDYTHLEEK(*)HNEESASR(*)      | K10 | 74.66 | 1000   | -         | 0.947368 | 0.966666 | 0.9570175   |
| Eea1     | Q8BL66 | 746  | ASK(*)EQALQSLQQQR(*)          | K3  | 62.16 | 1000   | 1.0425531 | 0.855263 | 0.944444 | 0.9474203   |
| Eea1     | Q8BL66 | 898  | ELK(*)HQLQVQAESALK(*)         | K3  | 48.21 | 276.94 | 1.2872340 | 1.157894 | 1.311111 | 1.25208     |
| Eea1     | Q8BL66 | 791  | LDLQNK(*)SEILENIK(*)          | K6  | 41.4  | 131.72 | 1.2659574 | 0.973684 | 0.855555 | 1.0317324   |
| Eea1     | Q8BL66 | 717  | EK(*)HLSLEQK(*)               | K2  | 40.05 | 120.29 | -         | 7.25     | 0.822222 | 4.0361111   |
| Eea1     | Q8BL66 | 983  | QIEALQGEVK(*)NAVSQLK(*)       | K10 | 34.32 | 69.64  | -         | -        | 0.333333 | 0.333333333 |
| Eea1     | Q8BL66 | 1340 | ENQSLQIK(*)HTQALNR(*)         | K8  | 29.08 | 1000   | 0.9148936 | 1.342105 | 1        | 1.0856663   |
| Eea1     | Q8BL66 | 303  | GSINELTQK(*)NQNLTEK(*)        | K9  | 25.35 | 93.6   | 2.4787234 | -        | 1.577777 | 2.0282506   |
| Eea1     | Q8BL66 | 294  | LK(*)GSINELTQK(*)             | K2  | 12.49 | 93.23  | -         | -        | 0.744444 | 0.744444444 |
| Eea1     | Q8BL66 | 58   | SLGSADELFK(*)HYQAVHDAGNDSG    | K10 | 7.12  | 1000   | -         | -        | 1.455555 | 1.455555556 |
| Srsf7    | Q8BL97 | 99   | GLDGK(*)VIC(+57.02)GSR(*)     | K5  | 88.71 | 1000   | 1.0329670 | 0.865168 | 1.109890 | 1.0026752   |
| Srsf7    | Q8BL97 | 53   | VYVGNLGTGAGK(*)GELER(*)       | K12 | 53.66 | 1000   | 0.9890109 | 0.943820 | 0.923076 | 0.9519694   |
| Lss      | Q8BLN5 | 15   | GGPYK(*)TEPATDLTR(*)          | K5  | 31.37 | 1000   | -         | 3.011494 | 0.923076 | 1.9672856   |
| Lss      | Q8BLN5 | 367  | IK(*)DYLWLGLDGMK(*)           | K2  | 29.61 | 106.36 | -         | -        | 0.857142 | 0.857142857 |
| Prpf18   | Q8BM39 | 300  | IFSK(*)HVAHVLNDETQR(*)        | K4  | 29.62 | 1000   | -         | -        | -        |             |
| Prpf18   | Q8BM39 | 327  | LMTIC(+57.02)QK(*)HFPTDPSK(*) | K7  | 23.91 | 46.32  | -         | -        | 0.580769 | 0.580769231 |
| Npat     | Q8BMA5 | 559  | VK(*)TNPQASEADSSETANR(*)      | K2  | 26.89 | 1000   | -         | -        | -        |             |
| Npat     | Q8BMA5 | 528  | NLVLSGK(*)NSQLLSQSTPLTTK(*)PS | K7  | 21.17 | 28.73  | -         | -        | -        |             |
| Npat     | Q8BMA5 | 1125 | ILSK(*)SETASSR(*)             | K4  | 20.33 | 1000   | -         | -        | -        |             |
| Srp68    | Q8BMA6 | 456  | EISLK(*)TLVFK(*)              | K5  | 45.63 | 94.22  | 0.8383838 | 0.7625   | 1.033333 | 0.8780724   |
| Srp68    | Q8BMA6 | 204  | FEHQEWK(*)SAIEAFNK(*)         | K7  | 43.97 | 84.61  | 1.3232323 | 1.4      | 1.322222 | 1.3484848   |
| Srp68    | Q8BMA6 | 610  | TK(*)SGLTGYIK(*)              | K2  | 42.45 | 124.34 | 0.7373737 | -        | 0.733333 | 0.7353535   |
| Srp68    | Q8BMA6 | 163  | AVK(*)HAEELER(*)              | K3  | 23.71 | 1000   | 0.8686868 | -        | 1.933333 | 1.4010101   |
| Slc25a24 | Q8BMD8 | 318  | LAVAK(*)TGQYSGIYGC(+57.02)AK  | K5  | 90.19 | 243.69 | 0.8556701 | 0.828947 | 0.987951 | 0.8908564   |
| Slc25a24 | Q8BMD8 | 96   | AFK(*)SLDK(*)                 | K3  | 80.28 | 87.62  | 1.0515463 | 1.105263 | 0.987951 | 1.0482538   |

|          |        |      |                                 |     |       |        |           |          |             |           |
|----------|--------|------|---------------------------------|-----|-------|--------|-----------|----------|-------------|-----------|
| Slc25a24 | Q8BMD8 | 334  | ILK(*)HEGFCAFYK(*)              | K3  | 76.92 | 176.79 | 0.7835051 | 0.894736 | 0.963855    | 0.8806991 |
| Slc25a24 | Q8BMD8 | 96   | LAFK(*)SLDK(*)                  | K4  | 27.62 | 63.97  | 0.7835051 | 0.802631 | -           | 0.7930684 |
| Slc25a24 | Q8BMD8 | 311  | IYPMEVLK(*)TR(*)                | K8  | 23.32 | 1000   | -         | -        | 1.060240964 |           |
| Slc25a32 | Q8BMG8 | 268  | LQDQHVSYGGVTDVITK(*)TWR(*)      | K17 | 37.03 | 1000   | -         | -        | 1.453488372 |           |
| Lars     | Q8BMJ2 | 916  | LK(*)NYMMPAK(*)                 | K2  | 80.12 | 142.27 | 0.75      | 0.740259 | 0.833333    | 0.774531  |
| Lars     | Q8BMJ2 | 721  | MSK(*)STGNFLTLSQAVDK(*)         | K3  | 72.69 | 293.07 | -         | 0.870129 | -           |           |
| Lars     | Q8BMJ2 | 649  | DAPFPK(*)TQIPK(*)               | K6  | 60.32 | 52.68  | 0.6847826 | 0.597402 | 0.655555    | 0.6459136 |
| Lars     | Q8BMJ2 | 824  | EALK(*)TGFFEFQAAK(*)            | K4  | 56.16 | 166.08 | 0.9347826 | -        | 0.866666    | 0.9007246 |
| Lars     | Q8BMJ2 | 1086 | TEPGVPVSLVNPQPSSGHFSTK(*)IDIF   | K22 | 54.92 | 1000   | -         | -        | 0.966666667 |           |
| Lars     | Q8BMJ2 | 200  | TIGLK(*)VDWR(*)                 | K5  | 47.97 | 1000   | 0.9456521 | -        | 0.922222    | 0.9339372 |
| Lars     | Q8BMJ2 | 84   | GK(*)SC(+57.02)LFPFGLHC(+57.02  | K2  | 46.7  | 149.49 | 0.7391304 | 1.064935 | 1.077777    | 0.9606144 |
| Lars     | Q8BMJ2 | 272  | LK(*)VLEPYPSK(*)                | K2  | 39.21 | 150.89 | 0.5760869 | -        | 1.1         | 0.8380435 |
| Lars     | Q8BMJ2 | 9    | K(*)GTAK(*)VDFLK(*)             | K5  | 36.72 | 28.7   | 0.8260869 | 0.896103 | -           | 0.8610954 |
| Lars     | Q8BMJ2 | 1058 | EEC(+57.02)C(+57.02)PGK(*)PLNVF | K7  | 7.47  | 1000   | -         | -        | 1.688888889 |           |
| Lars     | Q8BMJ2 | 71   | SLSK(*)C(+57.02)EFAVGYQR(*)     | K4  | 4.1   | 1000   | -         | -        | 4.844444444 |           |
| Eif1ax   | Q8BMJ3 | 88   | DYQDNK(*)ADVILK(*)              | K6  | 90.38 | 134.33 | 1.3052631 | 1.041666 | 0.988888    | 1.1119396 |
| Ckap4    | Q8BMK4 | 567  | LFLK(*)VEK(*)                   | K4  | 79.06 | 62.26  | -         | -        | 1.010989011 |           |
| Ckap4    | Q8BMK4 | 312  | ELVSLK(*)QEQQAFK(*)             | K6  | 54.97 | 128.65 | -         | 0.797468 | -           |           |
| Ckap4    | Q8BMK4 | 539  | SVK(*)IETNENNLESAC(*)           | K3  | 46.3  | 220.17 | 1.4343434 | 1.367088 | 1.494505    | 1.4319792 |
| Ckap4    | Q8BMK4 | 251  | MK(*)VASLEESK(*)                | K2  | 11.61 | 86.34  | 1.8484848 | -        | -           |           |
| Qars     | Q8BML9 | 25   | ETLK(*)NEALSTQLR(*)             | K4  | 67.6  | 1000   | 0.84375   | 0.694117 | 0.75        | 0.7626225 |
| Qars     | Q8BML9 | 166  | MIK(*)NEVDMQVLHLLGPK(*)         | K3  | 35.7  | 174.34 | 0.8958333 | -        | 0.885416    | 0.890625  |
| Hadha    | Q8BMS1 | 60   | INSPNSK(*)VNTLNK(*)             | K7  | 51.53 | 113.99 | 0.8543689 | 0.8125   | 0.623655    | 0.7635083 |
| Ncs1     | Q8BNY6 | 53   | IYK(*)QFFPFGDPTK(*)             | K3  | 10.45 | 82.84  | -         | -        | 1.607954545 |           |
| Sfr1     | Q8BP27 | 255  | IK(*)NDVTELENLIK(*)             | K2  | 46.28 | 203.1  | 0.5       | 1.142857 | 0.876404    | 0.8397539 |
| Sfr1     | Q8BP27 | 202  | NTC(+57.02)ESK(*)SSDTGSSNALPK(  | K6  | 21.41 | 167.25 | 1.9102564 | 1.271428 | 1.449438    | 1.5437077 |
| NARS1    | Q8BP47 | 140  | VK(*)VFGWVHR(*)                 | K2  | 81.81 | 1000   | 0.7849462 | -        | 0.860215    | 0.8225806 |
| NARS1    | Q8BP47 | 115  | IIK(*)NDPSLPEPAC(+57.02)VK(*)   | K4  | 77.33 | 160.66 | 1.1505376 | 0.740740 | 0.784946    | 0.8920749 |
| NARS1    | Q8BP47 | 153  | QGK(*)NLMFLVLR(*)               | K3  | 55.29 | 1000   | 0.7634408 | 0.814814 | 0.903225    | 0.8271605 |
| NARS1    | Q8BP47 | 456  | FPVEIK(*)SFYMQR(*)              | K6  | 54.89 | 1000   | 0.7634408 | 0.864197 | 0.849462    | 0.8257003 |
| NARS1    | Q8BP47 | 71   | WDVISK(*)SQMK(*)                | K6  | 17.8  | 44.28  | 0.9032258 | -        | 0.978494    | 0.9408602 |
| Rpl24    | Q8BP67 | 27   | TDGK(*)VFQFLNAK(*)              | K4  | 92.02 | 152.83 | 0.9029126 | 0.974025 | 0.905263    | 0.9274006 |
| Rpl24    | Q8BP67 | 12   | VELC(+57.02)SFSGYK(*)IYPGHGR(*) | K10 | 85.63 | 1000   | 0.5825242 | 0.753246 | 0.747368    | 0.6943798 |
| Rpl24    | Q8BP67 | 2    | MK(*)VELC(+57.02)SFSGYK(*)      | K2  | 64.97 | 188.26 | 0.9708737 | 0.935064 | 1.063157    | 0.9896989 |

|          |        |      |                                 |     |       |        |           |          |                    |
|----------|--------|------|---------------------------------|-----|-------|--------|-----------|----------|--------------------|
| Fra10ac1 | Q8BP78 | 36   | TVEDELLLTk(*)PFQK(*)            | K10 | 35.26 | 20.17  | -         | -        | -                  |
| Rcn2     | Q8BP92 | 27   | SK(*)AEELHYPQGEHR(*)            | K2  | 26.47 | 1000   | 1.2790697 | 0.337837 | 0.943181;0.8533631 |
| Map4k5   | Q8BPM2 | 797  | SFK(*)SDEVTQEISDETR(*)          | K3  | 16.35 | 1000   | 1.3023255 | 1.378048 | -1.3401872         |
| Elmo1    | Q8BPU7 | 408  | EDK(*)HEC(+57.02)PFGR(*)        | K3  | 28.33 | 1000   | -         | -        | 1.477272727        |
| Cpsf4    | Q8BQZ5 | 69   | TVVC(+57.02)K(*)HWLR(*)         | K5  | 59.6  | 1000   | 0.9587628 | 1.055555 | 1.833333;1.2825506 |
| Cpsf4    | Q8BQZ5 | 51   | AAC(+57.02)GK(*)GGMC(+57.02)PI  | K5  | 39.49 | 1000   | -         | 0.6      | 2.355555;1.4777778 |
| Kat6b    | Q8BRB7 | 860  | QSSAK(*)VQSK(*)NK(*)            | K9  | 77.22 | 30.36  | -         | -        | -                  |
| Kat6b    | Q8BRB7 | 856  | QSSAK(*)VQSK(*)NK(*)            | K5  | 77.22 | 129.19 | -         | -        | -                  |
| Kat6b    | Q8BRB7 | 413  | LAVTDPTR(*)PGATTK(*)TTTSSTYISAS | K14 | 55.26 | 214.3  | 0.3654618 | -        | -                  |
| Kat6b    | Q8BRB7 | 394  | VSTTPSSGHAASGK(*)HSSSR(*)       | K14 | 45.18 | 1000   | -         | -        | -                  |
| Scfd1    | Q8BRF7 | 428  | IMSK(*)TTLDK(*)                 | K4  | 66.1  | 43.82  | 0.7826086 | -        | 0.977528(0.8800684 |
| Tmtc3    | Q8BRH0 | 742  | YYPDHTK(*)GLILK(*)              | K7  | 37.48 | 65.44  | -         | -        | 0.895348837        |
| Tmtc3    | Q8BRH0 | 634  | ALELNPK(*)HK(*)                 | K7  | 34.71 | 39.76  | 1.2465753 | -        | -                  |
| Kmt2c    | Q8BRH4 | 2862 | GK(*)TALLTTDQDMLEK(*)           | K2  | 98.85 | 335.51 | -         | -        | -                  |
| Kmt2c    | Q8BRH4 | 2796 | DQGDK(*)TMVLEDK(*)              | K5  | 91.9  | 158.8  | -         | -        | -                  |
| Kmt2c    | Q8BRH4 | 2796 | DQGDK(*)TMVLEDK(*)DLPQR(*)      | K5  | 81.5  | 157.88 | -         | -        | -                  |
| Kmt2c    | Q8BRH4 | 820  | IGMGK(*)PAITK(*)                | K5  | 59.62 | 32.32  | -         | -        | -                  |
| Pbrm1    | Q8BSQ9 | 754  | DALVLHK(*)VLLETR(*)             | K7  | 36.97 | 1000   | 0.7710843 | 0.9      | 1.113924(0.9283361 |
| Pbrm1    | Q8BSQ9 | 128  | AYYK(*)PDSPEYK(*)               | K4  | 34.19 | 46.13  | -         | -        | 0.873417722        |
| Pbrm1    | Q8BSQ9 | 1167 | VGDC(+57.02)VFIK(*)SHGLVR(*)    | K8  | 24.88 | 1000   | -         | -        | 1.050632911        |
| Asph     | Q8BSY0 | 629  | GAPK(*)TC(+57.02)ALLEK(*)       | K4  | 48.18 | 46.67  | -         | 0.818181 | 0.979381;0.8987816 |
| Asph     | Q8BSY0 | 571  | ETGYTELVK(*)SLER(*)             | K9  | 8.68  | 1000   | -         | -        | 0.865979381        |
| Cep55    | Q8BT07 | 387  | AK(*)SQITQLESLK(*)              | K2  | 72.07 | 251.58 | 1         | 0.752941 | 0.806451;0.8531309 |
| Cep55    | Q8BT07 | 340  | ILYDSLLK(*)HQEEQAR(*)           | K8  | 65.74 | 1000   | 1.0322580 | -        | 0.806451(0.9193548 |
| Cep55    | Q8BT07 | 129  | ETDVLK(*)NQLSATTK(*)            | K6  | 3.34  | 68.3   | -         | -        | 1.225806452        |
| Cpne3    | Q8BT60 | 167  | SDPYLEFHK(*)QTSDGHWLMVHR(*)     | K9  | 61.12 | 1000   | 0.9278350 | -        | 0.880434;0.9041349 |
| Cpne3    | Q8BT60 | 262  | SYK(*)NSGVISVK(*)               | K3  | 37.33 | 154.74 | 0.4639175 | 0.827160 | 0.456521;0.5825333 |
| Cpne3    | Q8BT60 | 158  | DLFGK(*)SDPYLEFHK(*)            | K5  | 19.52 | 96.27  | 1.8762886 | 1.888888 | 1.815217;1.8601316 |
| Cpne3    | Q8BT60 | 52   | IK(*)NSLNPk(*)                  | K2  | 8.71  | 98.75  | -         | 1.432098 | -                  |
| Flna     | Q8BTM8 | 2607 | TPC(+57.02)EEILVK(*)HMGSR(*)    | K9  | 98.22 | 1000   | 0.9468085 | 0.870129 | 0.977272;0.9314037 |
| Flna     | Q8BTM8 | 781  | VYGPVAK(*)TGLK(*)               | K8  | 95.61 | 63.97  | 0.8829787 | 0.779220 | 0.829545;0.8305817 |
| Flna     | Q8BTM8 | 2575 | AYVGQK(*)SNFTVDC(+57.02)SK(*)   | K6  | 84.31 | 181.94 | 0.9361702 | 0.909090 | 0.636363(0.8272083 |
| Flna     | Q8BTM8 | 508  | VYTK(*)GAGSGELK(*)              | K4  | 81.7  | 161.49 | 0.7872340 | 0.896103 | 0.920454;0.8679308 |
| Flna     | Q8BTM8 | 2569 | GLGLSK(*)AYVGQK(*)              | K6  | 81.63 | 102.87 | 0.9893617 | 0.935064 | 0.761363(0.8952634 |

|       |        |      |                                   |     |       |        |           |          |          |             |
|-------|--------|------|-----------------------------------|-----|-------|--------|-----------|----------|----------|-------------|
| Flna  | Q8BTM8 | 2623 | DK(*)GEYTLVVK(*)                  | K2  | 79.53 | 150.77 | 0.8936170 | 0.818181 | 0.965909 | 0.8925693   |
| Flna  | Q8BTM8 | 376  | SPFEVYVDK(*)SQGDASK(*)            | K9  | 71.29 | 71.72  | -         | 0.818181 | 0.818181 | 0.8181818   |
| Flna  | Q8BTM8 | 1007 | VASK(*)IVSPSGAAVPC(+57.02)K(*)    | K4  | 57.8  | 126.66 | 0.7340425 | 0.584415 | 0.795454 | 0.7046376   |
| Flna  | Q8BTM8 | 771  | VNVGAGSHPNK(*)VK(*)               | K11 | 56.68 | 24.32  | 0.9255319 | -        | 0.829545 | 0.8775387   |
| Flna  | Q8BTM8 | 700  | TGVAVNK(*)PAEFTVDAK(*)HAGK(*)     | K16 | 49.32 | 42.89  | 0.9148936 | 0.883116 | 0.897727 | 0.8985793   |
| Flna  | Q8BTM8 | 700  | PAEFTVDAK(*)HAGK(*)               | K9  | 43.73 | 38.03  | 1.1808510 | -        | -        | -           |
| Flna  | Q8BTM8 | 684  | GPGLEK(*)TGVAVNK(*)PAEFTVDAK(*)   | K6  | 42.97 | 81.81  | -         | -        | 0.738636 | 0.7386364   |
| Flna  | Q8BTM8 | 906  | GK(*)LDVQFSGLAK(*)                | K2  | 39.59 | 192.46 | 0.6808510 | 1.285714 | 1.034090 | 1.0002188   |
| Flna  | Q8BTM8 | 1294 | ALTQTGGPHVK(*)AR(*)               | K11 | 39.18 | 1000   | 1.4893617 | 1.129870 | 0.965909 | 1.195047    |
| Flna  | Q8BTM8 | 975  | IK(*)VSLGLDK(*)                   | K2  | 34.96 | 51.59  | -         | -        | 0.818181 | 0.8181818   |
| Flna  | Q8BTM8 | 2367 | GAIDAK(*)VHSPSGALEEC(+57.02)Y     | K6  | 34.18 | 48.6   | -         | -        | 1.545454 | 1.5454545   |
| Flna  | Q8BTM8 | 383  | SQGDASK(*)VTAQGPGLPSGNIANK        | K7  | 33.63 | 188.86 | 0.6808510 | 1.194805 | -        | 0.9378281   |
| Flna  | Q8BTM8 | 1477 | ANLPQSFLQVDTSK(*)AGVAPLQVK(*)     | K13 | 29.92 | 74.73  | 0.9574468 | -        | -        | -           |
| Flna  | Q8BTM8 | 2133 | FADQHVPGPSFVSK(*)VTGEGR(*)        | K14 | 26.57 | 1000   | 1.4468085 | -        | 1.363636 | 1.4052224   |
| Flna  | Q8BTM8 | 2217 | YK(*)GQHVPGPSFQFTVGPLGEGGA        | K2  | 23.65 | 175.6  | 1.1702127 | 1.194805 | 1.011363 | 1.1254605   |
| Flna  | Q8BTM8 | 569  | SPFEVK(*)VGTEC(+57.02)GNQK(*)     | K6  | 22.96 | 99.51  | 1.1063829 | 1.038961 | 1.022727 | 1.0560238   |
| Flna  | Q8BTM8 | 2584 | SNFTVDC(+57.02)SK(*)AGNNMLLV      | K9  | 22.05 | 1000   | -         | 1.870129 | 1.602272 | 1.7362013   |
| Flna  | Q8BTM8 | 2473 | VK(*)MDC(+57.02)QEC(+57.02)PEG    | K2  | 17.7  | 1000   | -         | 1.324675 | -        | -           |
| Flna  | Q8BTM8 | 2540 | LVSNSHSLHETSSVFVDSLTK(*)VATVP     | K20 | 16.81 | 61.11  | -         | -        | 1.295454 | 1.2954545   |
| Flna  | Q8BTM8 | 270  | LK(*)PGAPLR(*)PK(*)               | K2  | 14.83 | 107.29 | -         | -        | 1.022727 | 1.0227273   |
| Flna  | Q8BTM8 | 865  | VK(*)VEPSHDASK(*)                 | K2  | 14.23 | 60.15  | -         | 0.922077 | -        | -           |
| Flna  | Q8BTM8 | 2387 | VHSPSGALEEC(+57.02)YVTEIDQDK      | K20 | 4.73  | 1000   | -         | -        | 0.488636 | 0.4886364   |
| Gmppb | Q8BTZ7 | 137  | HHGQEGSILVTK(*)VEEPSK(*)          | K12 | 30.86 | 78.19  | 0.7410714 | 1.459016 | -        | 1.1000439   |
| Pwp2  | Q8BU03 | 43   | VTVFDLK(*)NNR(*)                  | K7  | 17.68 | 1000   | 0.8795180 | 1.442857 | 1.354838 | 1.225738    |
| Iars  | Q8BU30 | 1115 | LK(*)TVVTSVFGVK(*)                | K2  | 84.93 | 131.64 | 0.8617021 | -        | 0.936170 | 0.8989362   |
| Iars  | Q8BU30 | 1125 | TVVTSVFGVK(*)NAK(*)               | K10 | 79.1  | 24.24  | 0.8617021 | 0.975    | 1.095744 | 0.9774823   |
| Iars  | Q8BU30 | 132  | YSAEWK(*)STVTR(*)                 | K6  | 74.21 | 1000   | -         | 0.7      | -        | -           |
| Iars  | Q8BU30 | 24   | ILEFWSK(*)HNC(+57.02)FQEC(+57.02) | K7  | 61.47 | 45.63  | 0.9255319 | 0.9625   | 0.914893 | 0.9343085   |
| Iars  | Q8BU30 | 290  | YK(*)PLFDYFIK(*)                  | K2  | 48.92 | 89.48  | 1         | -        | 0.978723 | 0.9893617   |
| Iars  | Q8BU30 | 796  | DK(*)DTLSIHLYMLPR(*)              | K2  | 42.9  | 1000   | -         | -        | 0.840425 | 0.84042532  |
| Iars  | Q8BU30 | 254  | GK(*)LFILTEAR(*)                  | K2  | 29.17 | 1000   | -         | -        | 1        | -           |
| Hook3 | Q8BUK6 | 62   | IK(*)TEVGDNWR(*)                  | K2  | 67.66 | 1000   | 0.8       | 0.852272 | 0.735632 | 0.7959683   |
| Dock1 | Q8BUR4 | 152  | VTAK(*)IDYGNR(*)                  | K4  | 8.48  | 1000   | -         | -        | 1.542857 | 1.542857143 |
| Gphn  | Q8BUV3 | 138  | GK(*)TLIINLPGSK(*)                | K2  | 10.22 | 133.99 | -         | -        | 1.086538 | 1.086538462 |



|         |        |     |                                 |     |       |        |           |          |             |
|---------|--------|-----|---------------------------------|-----|-------|--------|-----------|----------|-------------|
| Pggt1b  | Q8BUY9 | 284 | LLK(*)IFQYTNFEK(*)              | K3  | 10.77 | 128.89 | -         | -        | -           |
| Atp6v1h | Q8BVE3 | 371 | LEWSPVHK(*)SEK(*)               | K8  | 53.57 | 26.52  | 1.1153846 | 0.914893 | 0.9795911   |
| Nsd2    | Q8BVE8 | 588 | SQAATK(*)NLSDAC(+57.02)K(*)PLK  | K6  | 39.08 | 67.12  | -         | 0.640449 | 1           |
| Pdcl3   | Q8BVF2 | 206 | LSESGAIK(*)TALEENPK(*)          | K8  | 31.52 | 60.24  | 0.9569892 | 1.922077 | 0.439024    |
| Qdpr    | Q8BVI4 | 99  | SLFK(*)NC(+57.02)DMMWK(*)       | K4  | 68.68 | 118.11 | -         | -        | 1.489130435 |
| Ppme1   | Q8BVQ5 | 121 | VK(*)NSEDLSAETMAK(*)            | K2  | 48.08 | 223.58 | 0.5858585 | 0.666666 | 0.831578    |
| Ppme1   | Q8BVQ5 | 217 | SLENAIEWSVK(*)SGQIR(*)          | K11 | 39.61 | 1000   | -         | -        | 0.852631579 |
| Rsl1d1  | Q8BVY0 | 253 | LLFLK(*)TEK(*)                  | K5  | 82.35 | 37.81  | 0.7553191 | 0.696202 | 1.011494    |
| Rsl1d1  | Q8BVY0 | 187 | K(*)VPVSVNLLAK(*)NLSK(*)        | K11 | 58.77 | 38.26  | 0.9361702 | 0.506329 | 0.862068    |
| Rsl1d1  | Q8BVY0 | 187 | VPVSVNLLAK(*)NLSK(*)            | K10 | 54.63 | 58.99  | 0.6382978 | 0.810126 | 1.080459    |
| Nob1    | Q8BW10 | 282 | VFC(+57.02)GHC(+57.02)GNK(*)TL  | K9  | 47.36 | 40.63  | 0.7659574 | 0.471264 | 1.373493    |
| Ptges2  | Q8BWM0 | 114 | TC(+57.02)PFC(+57.02)SK(*)VR(*) | K7  | 27.4  | 1000   | -         | -        | 1.258823529 |
| Vps35l  | Q8BWQ6 | 309 | FLSK(*)TGISEC(+57.02)LPR(*)     | K4  | 37.33 | 1000   | 0.9896907 | -        | 0.782178    |
| Acaa2   | Q8BWT1 | 340 | ALDLPSK(*)TNVSGGAIALGHPLGG      | K8  | 11.35 | 1000   | -         | -        | 1.747126437 |
| Larp4   | Q8BWW4 | 256 | EEVK(*)TFQGK(*)                 | K4  | 49.77 | 45.16  | -         | -        | 0.735632184 |
| Larp4   | Q8BWW4 | 261 | TFQGK(*)PIMAR(*)                | K5  | 24.32 | 1000   | 0.5294117 | -        | 0.908045    |
| Larp4   | Q8BWW4 | 216 | ALFK(*)NENC(+57.02)PK(*)        | K4  | 17.06 | 95.35  | -         | 1.077922 | -           |
| Etf1    | Q8BWY3 | 22  | LIK(*)SLEAAR(*)                 | K3  | 57.21 | 1000   | 1         | 0.875    | 0.978947    |
| Etf1    | Q8BWY3 | 354 | DK(*)SHFTDK(*)                  | K2  | 43.33 | 74.6   | -         | -        | 0.863157895 |
| Etf1    | Q8BWY3 | 249 | LQSK(*)VLK(*)                   | K4  | 30.35 | 53.53  | 1.1505376 | -        | -           |
| Cip2a   | Q8BWY9 | 21  | AVK(*)SEANATQLLR(*)             | K3  | 32.39 | 1000   | 1.0101010 | -        | 0.5         |
| Naa25   | Q8BWZ3 | 432 | LLGLYHSMDK(*)SQK(*)             | K10 | 34.22 | 44.44  | -         | 1.469135 | 0.914893    |
| Naa25   | Q8BWZ3 | 170 | DENLSK(*)TMFLPLAER(*)           | K6  | 12.08 | 1000   | 1.4736842 | -        | 0.840425    |
| Rbbp5   | Q8BX09 | 202 | VTTGTSNTTAIK(*)SIEFAR(*)        | K12 | 22.91 | 1000   | -         | 1.192771 | 0.649350    |
| Rbbp5   | Q8BX09 | 179 | ILVLK(*)TDSQDLVASFR(*)          | K5  | 9.96  | 1000   | -         | -        | 1.038961039 |
| Pgam5   | Q8BX10 | 161 | AVETTDIISK(*)HLPGVSR(*)         | K10 | 61.23 | 1000   | 0.9518072 | 0.891891 | 1.079545    |
| Pgam5   | Q8BX10 | 143 | FNK(*)IVHSSMTR(*)               | K3  | 15.3  | 1000   | -         | 1.472972 | -           |
| Gemin5  | Q8BX17 | 428 | SK(*)VTALC(+57.02)WHPNK(*)      | K2  | 67.52 | 235.31 | 1         | 0.807228 | 0.806451    |
| Gemin5  | Q8BX17 | 426 | NFWQGVK(*)SK(*)                 | K7  | 55.34 | 39.76  | 2.0888888 | 1.132530 | 2.086021    |
| Gemin5  | Q8BX17 | 998 | VYEAVELLK(*)SNHLYR(*)           | K9  | 43.93 | 1000   | -         | -        | 1.161290323 |
| Gemin5  | Q8BX17 | 419 | NNYDVK(*)NFWQGVK(*)             | K6  | 39.45 | 81.81  | -         | -        | 0.870967742 |
| Gemin5  | Q8BX17 | 344 | IVFNLC(+57.02)SLK(*)TEDGK(*)    | K9  | 12.33 | 34.83  | 10.433333 | -        | 18.89247    |
| Vps13c  | Q8BX70 | 192 | LATQVIK(*)NVQVK(*)              | K7  | 22.72 | 67.85  | 0.9047619 | 0.955882 | 0.6         |
| Fndc3a  | Q8BX90 | 384 | TK(*)NSLTLQWK(*)                | K2  | 91.66 | 193.63 | 1.1911764 | 1.059701 | 1.075949    |



|         |        |      |                                   |     |       |        |           |          |                    |
|---------|--------|------|-----------------------------------|-----|-------|--------|-----------|----------|--------------------|
| Fndc3a  | Q8BX90 | 528  | YDGEDLAYTVK(*)NLR(*)              | K11 | 7.21  | 1000   | -         | -        | 1.265822785        |
| Trerf1  | Q8BXJ2 | 646  | K(*)HPPIAAK(*)VEEPLK(*)           | K8  | 77.21 | 114.34 | -         | -        | -                  |
| Tmx3    | Q8BXZ1 | 270  | LK(*)SIIQEVAR(*)                  | K2  | 71.53 | 1000   | 0.9325842 | 0.830985 | 0.865168;0.8762462 |
| Tmx3    | Q8BXZ1 | 122  | TK(*)DDIIEFAHR(*)                 | K2  | 51.14 | 1000   | 1.0224719 | 0.985915 | 1.056179;1.0215224 |
| Hat1    | Q8BY71 | 12   | FLVEYK(*)SAVEK(*)                 | K6  | 82.37 | 103.33 | 1.0224719 | 0.904761 | 1.057471;0.9949017 |
| Usp47   | Q8BY87 | 1127 | VK(*)VC(+57.02)QLLVNEQEPC(+57.02) | K2  | 41.99 | 209.69 | -         | -        | 1.313253012        |
| Usp47   | Q8BY87 | 710  | K(*)PDQIFQSYK(*)PGEVMVK(*)        | K10 | 31.47 | 46.13  | 0.7362637 | 0.679487 | 0.469879;0.6285435 |
| Tbcd    | Q8BYA0 | 336  | LC(+57.02)APGK(*)SDQK(*)          | K6  | 43.47 | 22.37  | 1.0267857 | 1.416666 | 1.173469;1.2056406 |
| Poglut1 | Q8BYB9 | 93   | LGTHYQIIK(*)NR(*)                 | K9  | 6.01  | 1000   | -         | 0.987951 | 1.458823;1.2233877 |
| Tbc1d17 | Q8BYH7 | 355  | LQWK(*)SVSAEQER(*)                | K4  | 16.63 | 1000   | 2.5408163 | 1.048543 | 1.149425;1.5795951 |
| Ythdf3  | Q8BYK6 | 554  | IIATFK(*)HTTSIFDDFAHYEK(*)        | K6  | 50.95 | 132.96 | -         | -        | 0.93258427         |
| Parp12  | Q8BZ20 | 443  | FQAGK(*)HNYELHFK(*)               | K5  | 58.89 | 40.94  | -         | -        | -                  |
| Kat6a   | Q8BZ21 | 816  | VK(*)VGK(*)SVSR(*)                | K5  | 90.32 | 1000   | -         | -        | -                  |
| Kat6a   | Q8BZ21 | 813  | VK(*)VGK(*)SVSR(*)                | K2  | 90.32 | 1000   | -         | -        | -                  |
| Kat6a   | Q8BZ21 | 94   | LDTK(*)QSVDWNK(*)                 | K4  | 67.38 | 142.27 | -         | -        | -                  |
| Kat6a   | Q8BZ21 | 355  | GPFSK(*)VR(*)                     | K5  | 14.09 | 1000   | -         | -        | -                  |
| Pogz    | Q8BZH4 | 828  | LAC(+57.02)TSC(+57.02)TFATSVGD    | K18 | 38.74 | 1000   | -         | -        | 0.885057471        |
| Ncbp3   | Q8BZR9 | 482  | PAVSSTK(*)PDIR(*)                 | K7  | 34.67 | 1000   | -         | 0.698795 | 1.014705;0.8567505 |
| Ncbp3   | Q8BZR9 | 446  | ADSISTSNIK(*)NR(*)                | K10 | 7.61  | 1000   | -         | -        | 1.926470588        |
| Srek1   | Q8BZX4 | 186  | ISAAIEPESGK(*)SNER(*)             | K11 | 35.68 | 1000   | 0.49375   | -        | 0.387096;0.4404234 |
| Farsa   | Q8C0C7 | 229  | GVLPDSGHLHPLLK(*)VR(*)            | K14 | 67.58 | 1000   | 0.8484848 | 0.894736 | 1.122222;0.955148  |
| Farsa   | Q8C0C7 | 397  | EFFTK(*)LGITQLR(*)                | K5  | 63.09 | 1000   | 0.4747474 | 0.460526 | 0.755555;0.5636098 |
| Farsa   | Q8C0C7 | 481  | ELVGHK(*)VNLQMVYDSPVC(+57.02)     | K6  | 38.15 | 1000   | 0.8282828 | -        | 1.577777;1.2030303 |
| Farsa   | Q8C0C7 | 406  | FK(*)PAYNPYTEPSMEVFSYHQGLK(*)     | K2  | 31.56 | 89.11  | 1.0101010 | -        | 1.022222;1.0161616 |
| Ing4    | Q8C0D7 | 148  | SK(*)GK(*)NSDEEAPK(*)             | K4  | 84.56 | 150.89 | -         | -        | -                  |
| Ing4    | Q8C0D7 | 146  | SK(*)GK(*)NSDEEAPK(*)             | K2  | 84.56 | 213.35 | -         | -        | -                  |
| Ing4    | Q8C0D7 | 236  | GK(*)WFC(+57.02)PR(*)             | K2  | 75.98 | 1000   | -         | -        | -                  |
| Ing4    | Q8C0D7 | 156  | SK(*)GK(*)NSDEEAPK(*)AAQK(*)      | K12 | 25.25 | 47.31  | -         | -        | -                  |
| Ing4    | Q8C0D7 | 148  | SK(*)GK(*)NSDEEAPK(*)AAQK(*)      | K4  | 25.25 | 261.96 | -         | -        | -                  |
| Ing4    | Q8C0D7 | 146  | SK(*)GK(*)NSDEEAPK(*)AAQK(*)      | K2  | 25.25 | 320.47 | -         | -        | -                  |
| Vps26b  | Q8C0E2 | 203  | IK(*)HMEIDIHK(*)                  | K2  | 42.4  | 193.63 | 0.7314814 | 0.782051 | 1.072916;0.8621498 |
| Trim47  | Q8C0E3 | 365  | ELSFTK(*)SSQVVK(*)                | K6  | 45.96 | 90.89  | -         | -        | 0.848214286        |
| Trim47  | Q8C0E3 | 261  | TVALIK(*)SAAVAER(*)               | K6  | 11.22 | 1000   | 0.6226415 | -        | -                  |
| Epc2    | Q8C0I4 | 23   | GK(*)DMPDLNDC(+57.02)VSINR(*)     | K2  | 53.46 | 1000   | -         | -        | -                  |

|          |        |      |                                  |     |       |        |           |          |                    |
|----------|--------|------|----------------------------------|-----|-------|--------|-----------|----------|--------------------|
| Atg16l1  | Q8C0J2 | 45   | LLEK(*)SDLHSVLTQK(*)             | K4  | 19.94 | 104.83 | -         | -        | 0.816              |
| Atg16l1  | Q8C0J2 | 91   | IK(*)HQEELTELHK(*)               | K2  | 8.73  | 192.46 | -         | -        | 0.8                |
| Sowahc   | Q8C0J6 | 51   | FK(*)ELVNAVATVR(*)               | K2  | 9.26  | 1000   | -         | -        | 0.303030303        |
| Asrgl1   | Q8C0M9 | 287  | GLGGLILVVK(*)TGDWVAK(*)          | K10 | 37.68 | 51.17  | -         | -        | -                  |
| Ncaph    | Q8C156 | 638  | LK(*)QSMWSLLTK(*)                | K2  | 67.66 | 182.71 | -         | -        | 0.935483871        |
| Ncaph    | Q8C156 | 627  | IEIHYAK(*)TAK(*)                 | K7  | 66.3  | 38.16  | 0.8144329 | 0.813333 | 0.849462:0.8257429 |
| Ncaph    | Q8C156 | 620  | VNK(*)IEIHYAK(*)                 | K3  | 45.84 | 154.98 | 1.1752577 | 0.666666 | 0.838709:0.8935447 |
| Ncaph    | Q8C156 | 488  | AATILTK(*)STLENQNWK(*)           | K7  | 24.06 | 106.84 | -         | 0.946666 | -                  |
| Cpne1    | Q8C166 | 170  | QGDGK(*)WQLAYR(*)                | K5  | 88.62 | 1000   | 0.83      | 0.8625   | 0.968085:0.8868617 |
| Cpne1    | Q8C166 | 181  | TEVVK(*)NNLNPTWK(*)              | K5  | 81.57 | 171.6  | 0.89      | 0.825    | 0.978723:0.8979078 |
| Prepl    | Q8C167 | 437  | LFEETGHEDPITK(*)TSR(*)           | K13 | 29.82 | 1000   | -         | -        | 0.844444444        |
| Cers6    | Q8C172 | 92   | VFTAITK(*)HPDEK(*)               | K7  | 65.73 | 51     | -         | -        | -                  |
| Mbnl2    | Q8C181 | 41   | FAHPPK(*)SC(+57.02)QVENGR(*)     | K6  | 37.8  | 1000   | -         | -        | 0.705882353        |
| Mbnl2    | Q8C181 | 178  | TDK(*)LEVC(+57.02)R(*)           | K3  | 33.98 | 1000   | -         | 0.464646 | 0.302521:0.3835837 |
| Mtrr     | Q8C1A3 | 596  | HFLK(*)TGVLTCLK(*)               | K4  | 10.92 | 118.18 | -         | -        | -                  |
| Thop1    | Q8C1A5 | 559  | QIVLAK(*)VDQVLHTQTDADPAEEYAF     | K6  | 73.05 | 1000   | -         | -        | 0.933333333        |
| Thop1    | Q8C1A5 | 628  | FK(*)QEGVLSPPK(*)                | K2  | 72.51 | 172.06 | 1         | 0.924050 | 0.911111:0.9450539 |
| Thop1    | Q8C1A5 | 2    | MK(*)PPAAC(+57.02)AGDVVDAASP     | K2  | 58.86 | 1000   | -         | 0.860759 | 1.122222:0.9914909 |
| Thop1    | Q8C1A5 | 667  | DPK(*)QDAFLSK(*)                 | K3  | 58.64 | 108.52 | 0.7422680 | 0.886075 | 0.811111:0.8131517 |
| Thop1    | Q8C1A5 | 249  | C(+57.02)K(*)EENC(+57.02)AILK(*) | K2  | 15.27 | 170.86 | 0.9896907 | 1.215189 | 1.288888:1.1645898 |
| Septin11 | Q8C1B7 | 184  | VNIPIIAK(*)ADTIK(*)              | K9  | 59.84 | 23.64  | 0.8585858 | 0.543209 | 1.079545:0.8271137 |
| Septin11 | Q8C1B7 | 175  | LDSK(*)VNIPIIAK(*)               | K4  | 49.66 | 222.06 | 0.9191919 | 0.666666 | 1.102272:0.8960438 |
| Septin11 | Q8C1B7 | 175  | K(*)LDSK(*)VNIPIIAK(*)           | K5  | 39.89 | 42.89  | 0.2222222 | 0.641975 | 1.113636:0.659278  |
| Septin11 | Q8C1B7 | 162  | SLK(*)SLDLVTMK(*)                | K3  | 9.31  | 43.45  | -         | 1.567901 | -                  |
| Iws1     | Q8C1D8 | 600  | ILQELPSVSQETLK(*)HSGIGR(*)       | K14 | 49.43 | 1000   | 1.8461538 | -        | 1.161290:1.5037221 |
| Trmt10a  | Q8C1Z8 | 169  | DIHIK(*)SEHYSELIK(*)             | K5  | 44.28 | 45.63  | -         | -        | 0.741721854        |
| Rbm14    | Q8C2Q3 | 164  | GPALAIQSGDK(*)TK(*)              | K11 | 55.46 | 20.41  | 0.8076923 | 0.695121 | 0.888888:0.7972344 |
| Lmf2     | Q8C3X8 | 567  | YWFSK(*)PGDQSR(*)                | K5  | 14.72 | 1000   | -         | -        | 1.375              |
| Kntc1    | Q8C3Y4 | 2092 | HQQIK(*)NFLNSC(+57.02)DAR(*)     | K5  | 36.25 | 1000   | -         | 0.526881 | -                  |
| Kntc1    | Q8C3Y4 | 1092 | DLLK(*)HYC(+57.02)NADTGR(*)      | K4  | 34.6  | 1000   | 0.8648648 | 0.516129 | 0.731958:0.7043176 |
| Kntc1    | Q8C3Y4 | 1367 | FIDK(*)AWQNYDK(*)                | K4  | 28.21 | 93.15  | -         | -        | 1.587628866        |
| Kntc1    | Q8C3Y4 | 1951 | GLWK(*)NHSHEPMAVR(*)             | K4  | 7.96  | 1000   | 0.2972972 | -        | 0.309278:0.3032878 |
| Tbl3     | Q8C4J7 | 593  | LWTIK(*)SNEC(+57.02)VR(*)        | K5  | 47.34 | 1000   | 0.8888888 | 1.329113 | 1.076086:1.0980299 |
| Tbl3     | Q8C4J7 | 407  | MNK(*)AGQVAC(+57.02)VAQSGSH      | K3  | 7.46  | 1000   | 2.2222222 | -        | -                  |

|          |        |      |                                 |     |       |        |           |          |                    |
|----------|--------|------|---------------------------------|-----|-------|--------|-----------|----------|--------------------|
| Heatr5b  | Q8C547 | 841  | GLAENK(*)STLGPEEVR(*)           | K6  | 24.95 | 1000   | -         | -        | 0.904761905        |
| Heatr5b  | Q8C547 | 42   | VLVAANK(*)TDVK(*)               | K7  | 10.37 | 42.89  | -         | -        | 1.154761905        |
| Rae1     | Q8C570 | 212  | IESPLK(*)HQHR(*)                | K6  | 48.51 | 1000   | 0.8817204 | 0.906666 | 0.967741;0.9187097 |
| Rae1     | Q8C570 | 212  | R(*)IESPLK(*)HQHR(*)            | K7  | 12.57 | 1000   | 1.4193548 | 1.44     | 1.129032;1.3294624 |
| Nadk2    | Q8C5H8 | 64   | VVVVAK(*)TTR(*)                 | K6  | 78.46 | 1000   | 0.7731092 | 0.744444 | 0.911111;0.8095549 |
| Nadk2    | Q8C5H8 | 314  | QK(*)SSGLNLC(+57.02)TGTGSK(*)   | K2  | 65.19 | 171.83 | 0.6638655 | 0.666666 | 0.966666;0.765733  |
| Nadk2    | Q8C5H8 | 407  | C(+57.02)FSSK(*)VC(+57.02)VR(*) | K5  | 33.26 | 1000   | 1.1848739 | 0.766666 | 1.011111;0.9875506 |
|          | Q8C5K5 | 16   | LNC(+57.02)AEYK(*)NWWVK(*)      | K7  | 36.3  | 44.28  | -         | -        | 0.62745098         |
| Cnot2    | Q8C5L3 | 307  | SNLSTSGK(*)TTSSTDGPK(*)         | K8  | 15.79 | 81.58  | -         | -        | 2.658227848        |
| Cwc22    | Q8C5N3 | 2    | M(+42.01)K(*)SSVAHMK(*)         | K2  | 24.59 | 81.81  | 1.03125   | 1.5      | 0.590909(1.0407197 |
| Cwc22    | Q8C5N3 | 147  | MMQEQTDK(*)SSLAYQR(*)           | K9  | 15.97 | 1000   | -         | -        | 1.761363636        |
| Grsf1    | Q8C5Q4 | 308  | TGEAYVQFEEPEMANQALLK(*)HR(*)    | K20 | 38.3  | 1000   | -         | -        | 0.510638298        |
| Septin10 | Q8C650 | 182  | VNIPLIAK(*)ADTISK(*)            | K9  | 46.39 | 1000   | -         | -        | 0.988636364        |
| Septin10 | Q8C650 | 188  | ADTISK(*)SELQK(*)               | K6  | 42.79 | 60.87  | -         | -        | 1.977272727        |
| Uba6     | Q8C7R4 | 307  | TFC(+57.02)FEPLESQIK(*)HPR(*)   | K12 | 39.34 | 1000   | -         | -        | 1.358695652        |
| Uba6     | Q8C7R4 | 544  | IDAHLNK(*)VC(+57.02)PATESIYSDE  | K7  | 37.29 | 172.71 | 0.79      | -        | -                  |
| Uba6     | Q8C7R4 | 537  | INPQLK(*)IDAHLNK(*)             | K6  | 35.75 | 81     | -         | -        | 0.793478261        |
| Uba6     | Q8C7R4 | 839  | ATK(*)SDLQMTVLSFEK(*)           | K3  | 20.48 | 145.85 | -         | -        | 1.260869565        |
| Uba6     | Q8C7R4 | 295  | TPK(*)TFC(+57.02)FEPLESQIK(*)   | K3  | 19.83 | 106.18 | -         | 0.780487 | 1.423913(1.1022004 |
| Utp15    | Q8C7V3 | 245  | GGQLLVSLK(*)NHHK(*)             | K9  | 64.61 | 38.26  | 0.8660714 | 0.738095 | 0.854368;0.8195119 |
| Utp15    | Q8C7V3 | 230  | YVK(*)VWDMLK(*)                 | K3  | 38.72 | 60.84  | -         | -        | 0.737864078        |
| Utp15    | Q8C7V3 | 190  | LNPDLFVTGSYDHTVK(*)IFDAR(*)     | K16 | 29.87 | 1000   | -         | -        | 0.621359223        |
| Uba3     | Q8C878 | 409  | SPAITATLEGK(*)NR(*)             | K11 | 91.02 | 1000   | 0.8282828 | 0.741176 | 0.789473;0.786311  |
| Uba3     | Q8C878 | 147  | VPNC(+57.02)NVVPHFNK(*)IQDFNI   | K12 | 29.19 | 1000   | -         | -        | 0.894736842        |
| Ppfibp1  | Q8C8U0 | 652  | ELGIK(*)HSLHR(*)                | K5  | 55.92 | 1000   | 0.8777777 | 0.736842 | 0.932584;0.8490681 |
| Dido1    | Q8C9B9 | 1523 | SSLGK(*)TELSQEQQAPDPSQGAPN      | K5  | 70.61 | 1000   | 0.9896907 | -        | 1.333333;1.161512  |
| Ccdc186  | Q8C9S4 | 905  | LIK(*)HQHELEQR(*)               | K3  | 17.13 | 1000   | -         | -        | 0.617834395        |
| Immt     | Q8CAQ8 | 435  | QHIELALEK(*)HK(*)               | K9  | 64.56 | 39.76  | 1.0204081 | 0.784810 | 0.989361;0.9315267 |
| Immt     | Q8CAQ8 | 256  | AHSNILK(*)TAMDNSEIAGEK(*)       | K7  | 48.29 | 195.31 | 0.7551020 | 0.683544 | -0.7193232         |
| Acat2    | Q8CAY6 | 180  | EAQDK(*)VAVLSQNR(*)             | K5  | 76.2  | 1000   | 0.8571428 | 0.827160 | 0.988636;0.8909799 |
| Vwa8     | Q8CC88 | 984  | EVVNIVK(*)HLQK(*)               | K7  | 15.99 | 48.83  | -         | 0.813186 | -                  |
| Prpf31   | Q8CCF0 | 438  | QSVVYGGK(*)STIR(*)              | K8  | 94.08 | 1000   | 1.0217391 | 0.6875   | 0.863636;0.8576252 |
| Ufl1     | Q8CCJ3 | 289  | YK(*)NTQLLFLK(*)                | K2  | 10.64 | 112.87 | -         | -        | 1.115789474        |
| H2afy2   | Q8CCK0 | 123  | GK(*)SETILSPPEK(*)              | K2  | 38.01 | 215.31 | -         | 0.802631 | 1.288888;1.0457602 |

|        |        |      |                               |     |       |        |           |          |          |           |
|--------|--------|------|-------------------------------|-----|-------|--------|-----------|----------|----------|-----------|
| Pabpn1 | Q8CCS6 | 209  | FSGHPK(*)GFAYIEFS DK(*)       | K6  | 50.74 | 116.35 | 0.62      | -        | 0.826086 | 0.7230435 |
| Ttc27  | Q8CD92 | 777  | AIGLAHVAMK(*)C(+57.02)AESK(*) | K10 | 40.91 | 87.95  | 1.0361445 | 1.4      | 1.082474 | 1.1728729 |
| Vcpip1 | Q8CDG3 | 631  | LVTK(*)HFPGEFGSEILVQK(*)      | K4  | 37.05 | 186.55 | 1.2093023 | -        | 0.760869 | 0.9850859 |
| Vcpip1 | Q8CDG3 | 937  | TMGMADGK(*)HC(+57.02)TFPHLP   | K8  | 8.97  | 21.51  | 1.4883720 | -        | -        | -         |
| Ston1  | Q8CDJ8 | 342  | IHTVK(*)VEHVSYSSEK(*)         | K5  | 25.88 | 46.57  | -         | -        | 1.010989 | 0.11      |
| Ston1  | Q8CDJ8 | 695  | SLGVESDAQPQK(*)HVC(+57.02)QR  | K12 | 23.34 | 1000   | 1.1711711 | -        | 0.967032 | 1.0691021 |
| Trmt6  | Q8CE96 | 139  | DK(*)TEFAQDK(*)               | K2  | 6.1   | 98     | 0.3505747 | -        | 0.813008 | 0.5817914 |
| Nup88  | Q8CEC0 | 532  | ILAETPDSFEK(*)HIK(*)          | K11 | 51.48 | 22.34  | 1         | 0.797619 | 1.258823 | 1.0188142 |
| Nup88  | Q8CEC0 | 424  | YHC(+57.02)SHEAGVHSVGLTWIHK   | K19 | 48.31 | 22.45  | 1.2421052 | -        | -        | -         |
| Ppwd1  | Q8CEC6 | 127  | IEEGIEFVK(*)HFR(*)            | K9  | 38.42 | 1000   | 0.5035460 | -        | 0.953703 | 0.7286249 |
| Ppwd1  | Q8CEC6 | 127  | K(*)IEEGIEFVK(*)HFR(*)        | K10 | 14.97 | 148.12 | 1.4680851 | 1.195121 | 1.361111 | 1.3414394 |
| Naa30  | Q8CES0 | 235  | LITK(*)DLSEPYSIYTYR(*)        | K4  | 83.16 | 1000   | 0.9468085 | 1.069306 | 0.526315 | 0.8474771 |
| Naa30  | Q8CES0 | 104  | SK(*)VLSAAEAAPDGASK(*)        | K2  | 74.86 | 241.23 | 0.9361702 | 0.821782 | 0.651315 | 0.8030894 |
| Hpf1   | Q8CFE2 | 220  | VVTK(*)TFHGAGLVVPVDK(*)       | K4  | 34.22 | 86.52  | 1.1684210 | 0.675675 | 1.166666 | 1.0035878 |
| Scyl2  | Q8CFE4 | 493  | IK(*)NAC(+57.02)LQTSSLAVR(*)  | K2  | 27.88 | 1000   | 0.9684210 | 0.931818 | 1        | 0.9667464 |
| Scyl2  | Q8CFE4 | 609  | TK(*)LEQLHVMQEQQR(*)          | K2  | 16.69 | 1000   | 1.5263157 | -        | 1.055555 | 1.2909357 |
| Polr2b | Q8CFI7 | 409  | GMFK(*)NLLK(*)                | K4  | 30.47 | 64.16  | 0.8735632 | -        | -        | -         |
| Polr2b | Q8CFI7 | 1143 | NK(*)TQISLVR(*)               | K2  | 10.39 | 1000   | 3.6206896 | -        | -        | -         |
| Smc4   | Q8CG47 | 585  | VEEAK(*)SSLAMNR(*)            | K5  | 76.28 | 1000   | 0.8686868 | 0.810126 | 0.913043 | 0.8639523 |
| Smc4   | Q8CG47 | 1265 | LIGIYK(*)TYNSTK(*)            | K6  | 56.52 | 67.8   | 0.9393939 | 0.594936 | 1.336956 | 0.9570957 |
| Smc4   | Q8CG47 | 352  | EITEK(*)SNVLSNEMK(*)          | K5  | 41.45 | 154.91 | 0.7272727 | -        | 0.760869 | 0.7440711 |
| Smc4   | Q8CG47 | 91   | LMITHIVNQNFK(*)SYAGEK(*)      | K12 | 36.71 | 72.73  | 0.7676767 | -        | 0.771739 | 0.7697079 |
| Smc4   | Q8CG47 | 957  | EINDLK(*)TELK(*)              | K6  | 27.92 | 38.03  | 1.0808080 | -        | 1.260869 | 1.1708388 |
| Smc4   | Q8CG47 | 926  | AQVAIK(*)TADR(*)              | K6  | 21.21 | 1000   | -         | 0.886075 | 0.423913 | 0.6549945 |
| Smc4   | Q8CG47 | 488  | ELMGFNK(*)SVNEAR(*)           | K7  | 9.8   | 1000   | -         | -        | 0.760869 | 0.565     |
| Smc4   | Q8CG47 | 903  | AQQNK(*)LDTINK(*)             | K5  | 7.53  | 35.17  | -         | -        | 1.021739 | 13        |
| Smc2   | Q8CG48 | 495  | GK(*)HEALLAK(*)               | K2  | 74.19 | 128.65 | 1.1938775 | -        | 0.989473 | 1.0916756 |
| Smc2   | Q8CG48 | 919  | ELDHSISK(*)HK(*)              | K8  | 65.43 | 32.28  | 1.0816326 | 1.013157 | 0.831578 | 0.9754565 |
| Smc2   | Q8CG48 | 424  | LK(*)HAQQELK(*)               | K2  | 62.33 | 184.45 | 0.9081632 | -        | 0.989473 | 0.9488185 |
| Smc2   | Q8CG48 | 4    | MYVK(*)SIILEGFK(*)            | K4  | 62.17 | 132.61 | 0.8061224 | -        | 0.936842 | 0.8714823 |
| Smc2   | Q8CG48 | 312  | VNTK(*)SQSAFDLK(*)            | K4  | 60.76 | 152.83 | 0.8265306 | 0.855263 | 0.926315 | 0.8693699 |
| Smc2   | Q8CG48 | 706  | ALEEELAGLK(*)NVAEK(*)         | K10 | 39.88 | 77.53  | -         | -        | 0.810526 | 316       |
| Smc2   | Q8CG48 | 12   | SIILEGFK(*)SYAQR(*)           | K8  | 33.42 | 1000   | 0.8265306 | 0.565789 | 0.747368 | 0.7132295 |
| Smc2   | Q8CG48 | 343  | ELQNSMAEDSK(*)ALAAK(*)        | K11 | 23.24 | 51     | 3.0714285 | -        | -        | -         |

|           |        |      |                                 |     |       |        |           |          |                     |           |
|-----------|--------|------|---------------------------------|-----|-------|--------|-----------|----------|---------------------|-----------|
| Smc2      | Q8CG48 | 297  | LK(*)SLEDAC(+57.02)AEAQR(*)     | K2  | 21.9  | 1000   | -         | 1.605263 | -                   |           |
| Smc2      | Q8CG48 | 958  | SAYDFK(*)TNNPK(*)               | K6  | 19.66 | 77.53  | 1.8979591 | -        | 1.4631571 1.6805585 |           |
| Ppm1f     | Q8CGA0 | 120  | ALVTLLDAK(*)GLAR(*)             | K9  | 42.62 | 1000   | 1.0526315 | 1.222222 | 0.7022901 0.9923813 |           |
| Rbm28     | Q8CGC6 | 539  | GQSLGYAFAEFQK(*)HEHALR(*)       | K13 | 76.53 | 1000   | 0.2857142 | -        | 0.6568621 0.4712885 |           |
| Rbm28     | Q8CGC6 | 468  | LK(*)NQNIFVSQTR(*)              | K2  | 73.03 | 1000   | 0.75      | 0.5      | 0.9705881 0.7401961 |           |
| Rbm28     | Q8CGC6 | 463  | FELLK(*)HQK(*)                  | K5  | 16.39 | 46.91  | -         | 2.212765 | 1.5980391 1.9054026 |           |
| Eprs      | Q8CGC7 | 142  | QNK(*)TLVHVK(*)                 | K3  | 73.97 | 112.31 | 0.9278350 | 0.884615 | 0.9787231 0.9303913 |           |
| Eprs      | Q8CGC7 | 341  | AK(*)IDMSSNNGC(+57.02)MR(*)     | K2  | 55.68 | 1000   | 0.6701030 | 1        | 0.8404251 0.8368429 |           |
| Eprs      | Q8CGC7 | 1361 | FNHWELK(*)GVPVR(*)              | K7  | 52.79 | 1000   | 0.7835051 | 0.871794 | 0.9893611 0.8815539 |           |
| Eprs      | Q8CGC7 | 1421 | ASEDLK(*)THMVVSNTLEDFQK(*)      | K6  | 49.06 | 135.57 | 1.2268041 | 1.269230 | 1.1382971 1.2114443 |           |
| Eprs      | Q8CGC7 | 578  | INWGNINITK(*)IHK(*)             | K10 | 45.45 | 40.63  | 0.9793814 | 0.782051 | 0.9042551 0.8885627 |           |
| Eprs      | Q8CGC7 | 318  | NSVEK(*)NLQMWEEMK(*)            | K5  | 38.39 | 120.76 | 0.7319587 | -        | -                   |           |
| Eprs      | Q8CGC7 | 139  | GSAAWQEHLK(*)QNK(*)             | K10 | 19.95 | 56.34  | 1.6288659 | -        | -                   |           |
| Eprs      | Q8CGC7 | 650  | DSK(*)HEELMLGDPC(+57.02)LK(*)   | K3  | 18.2  | 80.99  | -         | -        | 0.70212766          |           |
| Eprs      | Q8CGC7 | 581  | IHK(*)NADGK(*)                  | K3  | 17.84 | 41.96  | 0.8865979 | -        | -                   |           |
| Eprs      | Q8CGC7 | 991  | DSSK(*)SQGSLSSGGAGEGQGPK(*)     | K4  | 16.95 | 120.79 | -         | -        | 1.478723404         |           |
| Eprs      | Q8CGC7 | 943  | AQYK(*)SLTGIEYK(*)PVSATGAEDK(*) | K4  | 15.85 | 63.64  | -         | -        | 0.914893617         |           |
| Tcerg1    | Q8CGF7 | 1018 | YITAK(*)ADFR(*)                 | K5  | 79.41 | 1000   | 0.7849462 | 0.810126 | -                   | 0.7975364 |
| Tcerg1    | Q8CGF7 | 755  | ATFSEFAAK(*)HAK(*)              | K9  | 71.29 | 44.44  | 1.1935483 | 0.860759 | 1.1505371           | 1.0682818 |
| Tcerg1    | Q8CGF7 | 798  | IK(*)SDFFELLSNHHLDSQSR(*)       | K2  | 16.39 | 1000   | -         | -        | 1.23655914          |           |
| Tcerg1    | Q8CGF7 | 1018 | DK(*)YITAK(*)ADFR(*)            | K7  | 12.78 | 107.29 | -         | -        | 1.247311828         |           |
| Tcerg1    | Q8CGF7 | 822  | VK(*)DK(*)VESDPR(*)             | K4  | 3.42  | 45.01  | -         | 3.215189 | -                   |           |
| Lonp1     | Q8CGK3 | 518  | ILC(+57.02)FHGPPGVGK(*)TSIAR(*) | K12 | 46.82 | 1000   | -         | 0.524390 | 0.9032251           | 0.713808  |
| Lonp1     | Q8CGK3 | 570  | TK(*)TENPLVLIDEVDK(*)           | K2  | 22.47 | 152.87 | -         | 0.939024 | 0.6236551           | 0.7813402 |
| Hist1h2bp | Q8CGP2 | 6    | PEPVK(*)SVPAPK(*)               | K5  | 76.02 | 101.67 | -         | -        | -                   |           |
| Hist1h2bp | Q8CGP2 | 13   | PEPVK(*)SVPAPK(*)K(*)GSK(*)     | K12 | 19.84 | 38.16  | -         | -        | -                   |           |
| Hist1h2bp | Q8CGP2 | 12   | PEPVK(*)SVPAPK(*)K(*)GSK(*)     | K11 | 19.84 | 49.79  | -         | -        | -                   |           |
| Hist1h2bp | Q8CGP2 | 6    | PEPVK(*)SVPAPK(*)K(*)GSK(*)     | K5  | 19.84 | 112.07 | -         | -        | -                   |           |
| Hist1h2bp | Q8CGP2 | 13   | SVPAPK(*)K(*)GSK(*)K(*)         | K7  | 7.58  | 28.7   | -         | -        | -                   |           |
| Hist1h2bp | Q8CGP2 | 12   | SVPAPK(*)K(*)GSK(*)K(*)         | K6  | 7.58  | 38.32  | -         | -        | -                   |           |
| Cherp     | Q8CGZ0 | 910  | NK(*)SYSFIAR(*)                 | K2  | 47.72 | 1000   | 1         | 1.027397 | 0.8089881           | 0.945462  |
| Cherp     | Q8CGZ0 | 888  | DK(*)WDQYK(*)                   | K2  | 43.14 | 95.62  | 1.7931034 | 1.109589 | 1.3033701           | 1.4020211 |
| Sugp2     | Q8CH09 | 1020 | EGHGLGSLGK(*)GIR(*)             | K10 | 34.37 | 1000   | -         | -        | -                   |           |
| Ccar1     | Q8CH18 | 785  | IYK(*)SLLSLPEK(*)               | K3  | 40.83 | 171.6  | 0.9529411 | 1.027027 | 0.9176471           | 0.9658718 |

|         |        |      |                                  |     |       |        |           |          |          |           |
|---------|--------|------|----------------------------------|-----|-------|--------|-----------|----------|----------|-----------|
| Ccar1   | Q8CH18 | 963  | LLNK(*)VVLR(*)                   | K4  | 30.93 | 1000   | 0.9176470 | 1.189189 | 1.294117 | 1.1336513 |
| Ccar1   | Q8CH18 | 785  | IYK(*)SLLSLPEK(*)EDK(*)          | K3  | 26.9  | 89.48  | 1.4117647 | 0.797297 | 0.952941 | 1.0540011 |
| Ccar1   | Q8CH18 | 656  | GLK(*)SQLIAR(*)                  | K3  | 6.42  | 1000   | -         | -        | 0.8      |           |
| Sltm    | Q8CH25 | 401  | AADLK(*)NLFGK(*)                 | K5  | 34.19 | 89.05  | 0.5957446 | 1.239436 | 0.822222 | 0.8858012 |
| Gcc2    | Q8CHG3 | 1265 | IQLAEMTSEK(*)HK(*)               | K10 | 37.45 | 22.85  | 0.78125   | -        | -        |           |
| Gcc2    | Q8CHG3 | 134  | EIESC(+57.02)K(*)NELMAVHSEHSK(   | K6  | 15.98 | 54.4   | -         | -        | 1.290322 | 581       |
| Septin8 | Q8CHH9 | 193  | ADTISK(*)SELHK(*)                | K6  | 67.11 | 65.44  | 1.1058823 | 0.784810 | 0.987341 | 0.9593448 |
| Kat5    | Q8CHK4 | 104  | EVPASAQASGK(*)TLPVQITLR(*)       | K11 | 24.67 | 1000   | -         | -        | -        |           |
| Dym     | Q8CHY3 | 216  | LVK(*)TLLYNFIR(*)                | K3  | 22.02 | 1000   | -         | -        | 0.540229 | 885       |
| Gatad2a | Q8CHY6 | 200  | GTQNIPAGK(*)TSLQTSSTR(*)         | K9  | 45.51 | 1000   | 0.5543478 | 0.635135 | 0.818181 | 0.6692216 |
| Gatad2a | Q8CHY6 | 573  | VVGTTGK(*)GTASNWK(*)             | K6  | 36.49 | 59.03  | 0.7717391 | 0.797297 | -        | 0.7845182 |
| Gatad2a | Q8CHY6 | 601  | VSPSLAVHK(*)TSSAVDR(*)           | K9  | 16.17 | 1000   | -         | -        | 1.171717 | 172       |
| Gnl3    | Q8CI11 | 232  | IC(+57.02)C(+57.02)GK(*)EALWK(*) | K5  | 73.69 | 83.98  | -         | 0.987179 | 0.915662 | 0.9514211 |
| Gnl3    | Q8CI11 | 362  | DSLHFFTK(*)LAQR(*)               | K8  | 63.71 | 1000   | 1.5294117 | 1.294871 | 1.891566 | 1.5719499 |
| Gnl3    | Q8CI11 | 177  | LILVLNK(*)SDLVPK(*)              | K7  | 45.28 | 90.16  | 0.8627450 | 0.923076 | 0.951807 | 0.9125431 |
| Gnl3    | Q8CI11 | 209  | ASTNLK(*)NR(*)                   | K6  | 13.14 | 1000   | -         | 0.769230 | 1.096385 | 0.9328082 |
| Cwf19l1 | Q8CI33 | 277  | QAAGGK(*)HIPAPQEEAC(+57.02)C     | K6  | 40.4  | 79.15  | -         | -        | 0.702127 | 66        |
| Pdlim5  | Q8CI51 | 432  | GPFLVALGK(*)SWHPPEEFNC(+57.02)   | K9  | 67.21 | 26.02  | 1.0898876 | -        | 1        | 1.0449438 |
| Pdlim5  | Q8CI51 | 432  | LVALGK(*)SWHPPEEFNC(+57.02)AH    | K6  | 23.16 | 21.46  | -         | -        | 0.427083 | 333       |
| Vps50   | Q8CI71 | 396  | VK(*)TYLLGTDLSIFK(*)             | K2  | 34.92 | 129.85 | -         | -        | 0.679245 | 283       |
| Pygb    | Q8CI94 | 725  | VEDVEALDQK(*)GYNAR(*)            | K10 | 42.88 | 1000   | -         | 0.807692 | 1.046511 | 0.927102  |
| Pygb    | Q8CI94 | 290  | VLYPNDNFFEGK(*)ELR(*)            | K12 | 4.03  | 1000   | -         | -        | 3.337209 | 302       |
| Fermt2  | Q8CIB5 | 74   | TWLLK(*)THWTLDK(*)               | K5  | 69.96 | 127.53 | 0.9021739 | -        | 0.955555 | 0.9288647 |
| Fermt2  | Q8CIB5 | 408  | DTSISC(+57.02)YK(*)SR(*)         | K8  | 66.08 | 1000   | 1.0978260 | 1.24     | 1.4      | 1.245942  |
| Fermt2  | Q8CIB5 | 247  | AK(*)TNQGWLSSR(*)                | K2  | 55.97 | 1000   | 0.8369565 | 0.88     | 1        | 0.9056522 |
| Fermt2  | Q8CIB5 | 112  | VK(*)VNFSDR(*)                   | K2  | 49.79 | 1000   | 1.0543478 | -        | 0.855555 | 0.9549517 |
| Fermt2  | Q8CIB5 | 393  | GYK(*)QYWC(+57.02)TFK(*)         | K3  | 39.87 | 112.7  | 1.8913043 | 1.413333 | 1.266666 | 1.5237681 |
| Fermt2  | Q8CIB5 | 605  | MDASTGDAIK(*)TWR(*)              | K10 | 37.11 | 1000   | 1.1739130 | 0.786666 | 1.5      | 1.1535266 |
| Esco2   | Q8CIB9 | 369  | GGK(*)DQLVIDAGQK(*)              | K3  | 40.46 | 132.72 | -         | -        | -        |           |
| Copa    | Q8CIE6 | 1119 | NFK(*)TAATFAR(*)                 | K3  | 82.49 | 1000   | 0.9782608 | 0.910256 | 1.107526 | 0.9986814 |
| Copa    | Q8CIE6 | 438  | MHSLLIK(*)NLK(*)                 | K7  | 81.91 | 44.84  | 1.0217391 | 0.923076 | 0.892473 | 0.9457631 |
| Copa    | Q8CIE6 | 441  | NLK(*)NEITK(*)                   | K3  | 81.32 | 100.21 | 0.9130434 | 1.153846 | 1        | 1.0222965 |
| Copa    | Q8CIE6 | 750  | ILK(*)NC(+57.02)GQK(*)           | K3  | 76.03 | 107.29 | 0.7173913 | 0.692307 | 0.784946 | 0.7315484 |
| Copa    | Q8CIE6 | 13   | VK(*)GLSFHPK(*)                  | K2  | 63.18 | 140.21 | -         | -        | 1.258064 | 516       |



|        |        |      |                               |     |       |        |           |          |                    |           |
|--------|--------|------|-------------------------------|-----|-------|--------|-----------|----------|--------------------|-----------|
| Copa   | Q8CIE6 | 198  | GITGVDLFGTTDAVVK(*)HVLEGHDR   | K16 | 62.84 | 1000   | -         | -        | 0.76344086         |           |
| Copa   | Q8CIE6 | 531  | VK(*)SGAWDESGVFIYTTSNHK(*)    | K2  | 52.78 | 277.25 | 0.8586956 | 0.666666 | 0.935483;0.8202821 |           |
| Copa   | Q8CIE6 | 574  | VK(*)GNNVYC(+57.02)LDR(*)     | K2  | 49.04 | 1000   | -         | 1.576923 | 1.720430;1.6486766 |           |
| Copa   | Q8CIE6 | 238  | MNESK(*)AWEVDTC(+57.02)R(*)   | K5  | 46.79 | 1000   | 1.2173913 | 1.346153 | 1.344086;1.3025437 |           |
| Copa   | Q8CIE6 | 993  | DAGLK(*)NGVPAVGLK(*)          | K5  | 45.96 | 148.12 | 0.7934782 | 0.589743 | 0.989247;0.7908231 |           |
| Copa   | Q8CIE6 | 76   | IK(*)VWNYK(*)                 | K2  | 35.83 | 127.18 | 0.6304347 | 1.243589 | 0.827956;0.9006605 |           |
| Copa   | Q8CIE6 | 350  | QLDFNSSK(*)DVAVMQLR(*)        | K8  | 14.83 | 1000   | -         | -        | 1.193548387        |           |
| Prmt5  | Q8CIG8 | 248  | GFPVLSK(*)VQQR(*)             | K7  | 26.65 | 1000   | 0.7469879 | 0.972222 | -                  | 0.8596051 |
| Prmt5  | Q8CIG8 | 516  | LHNFHQLSAPK(*)PC(+57.02)FTFSH | K11 | 20.57 | 1000   | -         | -        | 1.108433735        |           |
| Cdc123 | Q8CII2 | 24   | SLTIK(*)SVILPLPQNVK(*)        | K5  | 10.53 | 128.61 | -         | -        | 1.238095238        |           |
| Ints4  | Q8CIM8 | 158  | LVDVAC(+57.02)K(*)HLTDTSHGVR  | K7  | 49.86 | 1000   | 1.1047619 | 0.598039 | 0.808              | 0.8369337 |
| Pak2   | Q8CIN4 | 370  | DIK(*)SDNVLLGMEGSVK(*)        | K3  | 67.09 | 206.53 | -         | -        | 0.880434783        |           |
| Pak2   | Q8CIN4 | 113  | LLQTSNITK(*)LEQK(*)           | K9  | 32.23 | 41.04  | 0.2934782 | 0.211267 | 0.380434;0.2950602 |           |
| Trip10 | Q8CJ53 | 166  | LDQDINATK(*)ADVEK(*)          | K9  | 17.67 | 29.96  | -         | -        | 1.434782609        |           |
| Ahctf1 | Q8CJF7 | 2221 | TAEIAGK(*)TLGR(*)             | K7  | 73.77 | 1000   | 0.7692307 | 0.786666 | 0.705882;0.7539266 |           |
| Ahctf1 | Q8CJF7 | 2183 | NTGK(*)GSSWSPPPVEIK(*)        | K4  | 14.86 | 77.78  | -         | 1.346666 | -                  |           |
| Ago2   | Q8CJG0 | 727  | VGK(*)SGNIPAGTTVDTK(*)        | K3  | 34.6  | 107.9  | 0.6373626 | 0.740259 | 0.935483;0.7710354 |           |
| Hmgcs1 | Q8JZK9 | 409  | ITASLC(+57.02)DLK(*)SR(*)     | K9  | 77.6  | 1000   | 0.4347826 | 0.506329 | -                  | 0.4705559 |
| Hmgcs1 | Q8JZK9 | 273  | LVQK(*)SLAR(*)                | K4  | 58.29 | 1000   | -         | 0.582278 | 0.741935;0.662107  |           |
| Hmgcs1 | Q8JZK9 | 206  | GTHMQHAYDFYK(*)PDMLSEYPVVD    | K12 | 45.59 | 90.97  | 0.6086956 | -        | 0.763440;0.6860683 |           |
| Hmgcs1 | Q8JZK9 | 291  | DK(*)NSIYSGLEAFGDVK(*)        | K2  | 41.67 | 208.29 | -         | 0.835443 | 0.817204;0.8263237 |           |
| Acad9  | Q8JZN5 | 460  | ELK(*)SGNVTTVMETIGR(*)        | K3  | 43.7  | 1000   | 0.2916666 | -        | 0.485981;0.388824  |           |
| Acad9  | Q8JZN5 | 232  | AK(*)TEVVDS DGSK(*)           | K2  | 10.99 | 156.93 | 1.5729166 | -        | 0.990654;1.2817854 |           |
| Afg3l2 | Q8JZQ2 | 542  | HLSDAINEK(*)HFEQAIER(*)       | K9  | 16.68 | 1000   | 0.816     | -        | -                  |           |
| Afg3l2 | Q8JZQ2 | 617  | EQYLYTK(*)EQLLDR(*)           | K7  | 6.5   | 1000   | -         | -        | 1.566666667        |           |
| Eif3b  | Q8JZQ9 | 193  | LK(*)NVIHK(*)                 | K2  | 85    | 119.54 | 0.9368421 | 0.804878 | 0.9                | 0.8805734 |
| Eif3b  | Q8JZQ9 | 584  | ISVSFYHVK(*)SNGK(*)           | K9  | 56.06 | 55.36  | 1.0947368 | 0.987804 | 1.177777;1.0867732 |           |
| Eif3b  | Q8JZQ9 | 334  | WSPK(*)GTYLATFHQR(*)          | K4  | 51.47 | 1000   | 1.1684210 | 0.841463 | 0.922222;0.9773689 |           |
| Eif3b  | Q8JZQ9 | 518  | NGDYLC(+57.02)VK(*)VDR(*)     | K8  | 49.19 | 1000   | 0.6421052 | 0.792682 | 0.655555;0.6967812 |           |
| Eif3b  | Q8JZQ9 | 510  | LHWQK(*)NGDYLC(+57.02)VK(*)   | K5  | 45.93 | 101.72 | 1.4526315 | -        | 1.344444;1.398538  |           |
| Eif3b  | Q8JZQ9 | 205  | FGK(*)IINDYYPEEDGK(*)         | K3  | 44.97 | 186.68 | 0.8       | 2.463414 | 0.9                | 1.3878049 |
| Eif3b  | Q8JZQ9 | 718  | YSK(*)IFEQK(*)                | K3  | 39.79 | 87.95  | 0.9052631 | 1.109756 | 1.066666;1.0272286 |           |
| Eif3b  | Q8JZQ9 | 237  | GYIFLEYASPAHAVDAVK(*)NADGYK   | K18 | 35.61 | 23.15  | -         | -        | 0.977777778        |           |
| Eif3b  | Q8JZQ9 | 217  | IINDYYPEEDGK(*)TK(*)          | K12 | 25.28 | 22.85  | 2.0842105 | 1.621951 | 1.055555;1.5872391 |           |

|          |        |     |                                        |     |       |        |           |          |             |           |
|----------|--------|-----|----------------------------------------|-----|-------|--------|-----------|----------|-------------|-----------|
| Acsl5    | Q8JZR0 | 404 | LVFSK(*)IQGSLGGK(*)                    | K5  | 54.39 | 118.18 | 0.7       | 0.75     | -           | 0.725     |
| Slc25a1  | Q8JZU2 | 268 | ILK(*)NEGPK(*)                         | K3  | 50.82 | 105.53 | 0.9473684 | -        | -           |           |
| Slc25a1  | Q8JZU2 | 97  | GLSSLLYGSIPK(*)AAVR(*)                 | K12 | 16.64 | 1000   | 1.0315789 | 2.356164 | 1.074468    | 1.4874038 |
| Rbm17    | Q8JZX4 | 256 | EGQGLGK(*)HEQGLSTALSVEK(*)             | K7  | 74.74 | 44.86  | 1.4823529 | 0.648648 | 1.0125      | 1.0478339 |
| Rbm17    | Q8JZX4 | 276 | GGK(*)IIVGDATEK(*)                     | K3  | 27.04 | 120.76 | -         | 0.689189 | -           |           |
| Aldh1l2  | Q8K009 | 681 | QIMK(*)SC(+57.02)AVSNLK(*)             | K4  | 56.96 | 80.5   | -         | 0.652777 | -           |           |
| Aldh1l2  | Q8K009 | 866 | DINK(*)AMYVSDK(*)                      | K4  | 46.61 | 120.29 | 1.8709677 | 2.347222 | 1.511627    | 1.9099393 |
| Bclaf1   | Q8K019 | 419 | SVLADQGK(*)SFATSSHR(*)                 | K8  | 85.31 | 1000   | 1.2891566 | 0.92     | 0.954022    | 1.0543932 |
| Cyp51a1  | Q8K0C4 | 261 | EIK(*)NIFYK(*)                         | K3  | 87.48 | 84.49  | 0.7865168 | 1.012658 | 0.902173    | 0.9004497 |
| Cyp51a1  | Q8K0C4 | 160 | IHK(*)SGLNIAHFK(*)                     | K3  | 57.96 | 225.26 | 0.8202247 | 0.683544 | 0.956521    | 0.8200969 |
| Gmds     | Q8K0C9 | 294 | SFMHIGK(*)TIVWEGK(*)                   | K7  | 61.5  | 104.8  | -         | -        | 0.595744681 |           |
| Gmds     | Q8K0C9 | 287 | EFVEK(*)SFMHIGK(*)                     | K5  | 51.88 | 56.54  | 0.71      | 0.641975 | 0.872340    | 0.7414386 |
| Gmds     | Q8K0C9 | 301 | TIVWEGK(*)NENEVGR(*)                   | K7  | 39.7  | 1000   | 1.43      | 0.790123 | 0.680851    | 0.9669915 |
| Gfm1     | Q8K0D5 | 710 | SC(+57.02)TEGK(*)GEYTMETC(+57.02)GK(*) | K6  | 44.96 | 1000   | -         | -        | 0.79245283  |           |
| Eipr1    | Q8K0G5 | 86  | GVLATC(+57.02)YNNK(*)TTDSR(*)          | K9  | 37.26 | 1000   | 0.5465116 | -        | -           |           |
| Arhgap18 | Q8K0Q5 | 374 | IK(*)NLC(+57.02)QELEAK(*)              | K2  | 6.73  | 123.34 | -         | 0.454545 | -           |           |
| Plekho2  | Q8K124 | 134 | VDK(*)TC(+57.02)ALEHVTR(*)             | K3  | 40.85 | 1000   | -         | -        | 0.35483871  |           |
| Pdxk     | Q8K183 | 58  | GQVLK(*)SQELHELYEGLK(*)                | K5  | 51.38 | 93.08  | -         | 0.526315 | 0.975903    | 0.7511097 |
| Pdxk     | Q8K183 | 70  | SQELHELYEGLK(*)VNDVNK(*)               | K12 | 42.07 | 95.35  | -         | -        | 0.855421687 |           |
| Pdxk     | Q8K183 | 247 | LLAWTHK(*)HPDNLK(*)                    | K7  | 13.62 | 85.52  | -         | 1.394736 | 1.518072    | 1.4564046 |
| Cc2d1a   | Q8K1A6 | 284 | IAK(*)SFDPVLEALSR(*)                   | K3  | 15.5  | 1000   | -         | -        | 1.122222222 |           |
| Trnt1    | Q8K1J6 | 328 | NLGLFIVK(*)NR(*)                       | K8  | 74.32 | 1000   | 0.7878787 | 0.782051 | 0.872340    | 0.8140902 |
| Trnt1    | Q8K1J6 | 308 | VQDDVTK(*)LDLR(*)                      | K7  | 66.34 | 1000   | 0.8585858 | 1.217948 | -           | 1.0382673 |
| Trnt1    | Q8K1J6 | 320 | EEK(*)NLGLFIVK(*)                      | K3  | 62.01 | 123.53 | 0.8282828 | 0.794871 | 0.968085    | 0.8637466 |
| Trnt1    | Q8K1J6 | 402 | VGISGK(*)EIGALLQQLR(*)                 | K7  | 53.62 | 1000   | 1.1515151 | -        | 0.936170    | 1.0438427 |
| Trnt1    | Q8K1J6 | 283 | VSK(*)NVEGFSPK(*)                      | K3  | 39.73 | 83.15  | -         | -        | 0.755319149 |           |
| Dnm1l    | Q8K1M6 | 658 | LIK(*)SYFLIVR(*)                       | K3  | 12.46 | 1000   | -         | -        | 1.325842697 |           |
| Phldb2   | Q8K1N2 | 786 | EK(*)NNLIMMLQR(*)                      | K2  | 9.27  | 1000   | 1.0104166 | -        | -           |           |
| Pnpt1    | Q8K1R3 | 306 | LYAVFTDYEHDK(*)VSR(*)                  | K12 | 12.44 | 1000   | -         | -        | 1.08490566  |           |
| Pnpt1    | Q8K1R3 | 288 | YTK(*)IAMEK(*)                         | K3  | 6.85  | 94.27  | 3.0891089 | -        | 5.509433    | 4.2992714 |
| Nat10    | Q8K224 | 802 | NVAK(*)SALPALGR(*)                     | K4  | 46.76 | 1000   | 1.0202020 | -        | 0.954545    | 0.9873737 |
| Abcf3    | Q8K268 | 531 | IC(+57.02)VVGENGAGK(*)STMLK(*)         | K11 | 3.86  | 29.96  | -         | -        | 0.054945055 |           |
| Colgalt1 | Q8K297 | 533 | HPMSEYK(*)SHFSPR(*)                    | K7  | 62.85 | 1000   | 0.8089887 | -        | -           |           |
| Colgalt1 | Q8K297 | 600 | EAK(*)NSDVLQSPLDSTAR(*)                | K3  | 31.24 | 1000   | 0.8651685 | 1.607594 | -           | 1.2363817 |

|        |        |      |                                          |     |       |        |           |          |                    |
|--------|--------|------|------------------------------------------|-----|-------|--------|-----------|----------|--------------------|
| Anln   | Q8K298 | 914  | LLTSITSK(*)SSLHSSVMASPGGLGAVF            | K8  | 47.74 | 1000   | -         | -        | 0.680412371        |
| Anln   | Q8K298 | 1081 | DTLC(+57.02)VTK(*)NWLSADTK(*)            | K7  | 39.37 | 105.21 | -         | -        | 0.93814433         |
| Anln   | Q8K298 | 142  | GLNSGSEASATSSVK(*)TR(*)                  | K15 | 6.02  | 1000   | -         | -        | 0.75257732         |
| Gulp1  | Q8K2A1 | 184  | IQDLETENMELK(*)NK(*)                     | K12 | 36.07 | 36.05  | -         | -        | 0.977011494        |
| P3h4   | Q8K2B0 | 180  | NPK(*)HELTAK(*)                          | K3  | 59.73 | 43.32  | -         | -        | 0.703389831        |
| Sdha   | Q8K2B3 | 550  | HLK(*)TFDR(*)                            | K3  | 79.34 | 1000   | -         | -        | 0.907216495        |
| Sdha   | Q8K2B3 | 547  | ISQLYGDLLK(*)HLK(*)                      | K9  | 71.14 | 62.26  | 0.82      | 0.690476 | 0.855670;0.7887154 |
| Sdha   | Q8K2B3 | 250  | AK(*)NTVIATGGYGR(*)                      | K2  | 58.9  | 1000   | 0.76      | 0.654761 | 0.835051;0.7499378 |
| Sdha   | Q8K2B3 | 517  | LNMQK(*)SMQNHAHVFR(*)                    | K5  | 56.75 | 1000   | 0.85      | 0.857142 | 0.958762;0.8886352 |
| Edc3   | Q8K2D3 | 296  | LLSVAEK(*)HGLTLER(*)                     | K7  | 54.04 | 1000   | 0.8631578 | 0.542168 | 1.514705;0.9733442 |
| Lsm14a | Q8K2F8 | 17   | ISLISK(*)AEIR(*)                         | K6  | 41.52 | 1000   | -         | -        | 0.844444444        |
| Otud6b | Q8K2H2 | 34   | IQGMK(*)NAVPK(*)                         | K5  | 7.9   | 33.54  | -         | -        | 3.181818182        |
| Agfg1  | Q8K2K6 | 318  | VSTNK(*)AGLQTADK(*)                      | K5  | 14.35 | 101.72 | 0.5222222 | 0.5      | -0.5111111         |
| Brox   | Q8K2Q7 | 155  | IAAGIFK(*)HLK(*)                         | K7  | 57.28 | 49.37  | -         | -        | 0.989361702        |
| Brox   | Q8K2Q7 | 317  | LGSLVK(*)NTLDK(*)                        | K6  | 27.73 | 29.85  | -         | -        | 1.893617021        |
| Nmral1 | Q8K2T1 | 143  | LAAGHFDGK(*)GEVEEYFR(*)                  | K9  | 35.73 | 1000   | -         | -        | 0.417721519        |
| Ppp4r1 | Q8K2V1 | 724  | IGVLK(*)HLHDFLK(*)                       | K5  | 48.36 | 41.87  | -         | -        | 0.820224719        |
| Ipo11  | Q8K2V6 | 156  | ALLTFYHVTK(*)TLASK(*)                    | K10 | 50.06 | 53.48  | 0.7555555 | 1.162162 | 1.046511;0.9880764 |
| Ipo11  | Q8K2V6 | 329  | MIVK(*)NYAYK(*)PSK(*)                    | K4  | 26.23 | 115.97 | 1.6444444 | -        | 1.127906;1.3861757 |
| Prpf39 | Q8K2Z2 | 484  | NAK(*)SNNESSFYAIK(*)                     | K3  | 8.34  | 86.4   | -         | -        | 1.590909091        |
| Ncapd2 | Q8K2Z4 | 35   | EVLPAVK(*)HLSSQLR(*)                     | K6  | 69.16 | 1000   | 1.0919540 | 1.028169 | 0.977528;1.0325504 |
| Ncapd2 | Q8K2Z4 | 416  | LADK(*)SVLVC(+57.02)K(*)                 | K4  | 44.58 | 113.99 | -         | -        | 1.415730337        |
| Ncapd2 | Q8K2Z4 | 775  | GK(*)PEIVGSNLDALVR(*)                    | K2  | 42.28 | 1000   | 0.9655172 | 2.661971 | 1.382022;1.6698372 |
| Matr3  | Q8K310 | 3    | S(+42.01)K(*)SFQSSSLGR(*)                | K2  | 98.9  | 1000   | 1.0869565 | 0.670886 | 0.944444;0.9007623 |
| Matr3  | Q8K310 | 524  | IK(*)NYILMR(*)                           | K2  | 88.54 | 1000   | 1.0326086 | 0.873417 | 0.955555;0.9538607 |
| Matr3  | Q8K310 | 532  | MK(*)SQAFIEMETR(*)                       | K2  | 78.23 | 1000   | 0.9456521 | 0.620253 | 0.933333;0.8330796 |
| Matr3  | Q8K310 | 816  | LC(+57.02)SLFYTNEEVAK(*)NTHC(+57.02)K(*) | K13 | 42.89 | 29.08  | -         | -        | 1.188888889        |
| Champ1 | Q8K327 | 721  | GAVLHHLVVK(*)HNVHSPYK(*)                 | K10 | 23.06 | 25     | -         | -        | 0.662921348        |
| Champ1 | Q8K327 | 702  | YYC(+57.02)K(*)IC(+57.02)C(+57.02)K(*)   | K4  | 22.8  | 1000   | -         | 1.689655 | -                  |
| Kin    | Q8K339 | 3    | GK(*)SDFLSPK(*)                          | K2  | 48.93 | 144.88 | 1.8510638 | 0.869565 | -1.3603145         |
| Ddx18  | Q8K363 | 567  | NYFLHK(*)SAQEAYK(*)                      | K6  | 53.85 | 93.15  | 0.9777777 | 0.901234 | 1.011363;0.9634587 |
| Ddx18  | Q8K363 | 561  | LIEK(*)NYFLHK(*)                         | K4  | 53.05 | 132.53 | 0.9222222 | 0.716049 | 10.8794239         |
| Ddx18  | Q8K363 | 646  | IFK(*)HISK(*)                            | K3  | 42.67 | 77.13  | 1.4111111 | 0.740740 | -1.0759259         |
| Ddx18  | Q8K363 | 574  | SAQEAYK(*)SYIR(*)                        | K7  | 41.49 | 1000   | 0.8444444 | 1.432098 | 0.772727;1.0164235 |

|         |        |      |                                |     |       |        |           |          |                     |
|---------|--------|------|--------------------------------|-----|-------|--------|-----------|----------|---------------------|
| Ddx18   | Q8K363 | 535  | QSK(*)VPLNQFDFSWSK(*)          | K3  | 7.84  | 38.88  | 0.9444444 | -        | -                   |
| Hscb    | Q8K3A0 | 118  | HFSDK(*)HSTLVNDAYK(*)          | K5  | 37.8  | 59.58  | 2.8695652 | -        | -                   |
| Lzic    | Q8K3C3 | 13   | LK(*)QNLEEQLDR(*)              | K2  | 35.38 | 1000   | -         | -        | 0.62244898          |
| Swi5    | Q8K3D3 | 46   | VIELEK(*)HISLLHEYNDIK(*)       | K6  | 57.35 | 126.66 | 0.9375    | -        | 1.1830981.0602993   |
| Swi5    | Q8K3D3 | 23   | LK(*)EK(*)HDMMLDK(*)           | K4  | 9.07  | 52.04  | -         | -        | 1.549295775         |
| Appl1   | Q8K3H0 | 289  | NK(*)TGLVSSTWDR(*)             | K2  | 10.21 | 1000   | -         | -        | 6.423076923         |
| Casc3   | Q8K3W3 | 341  | SAETLK(*)HEASYR(*)             | K6  | 38.64 | 1000   | -         | -        | -                   |
| Pitrm1  | Q8K411 | 1012 | YLGIGK(*)STHGLAILGPENSK(*)     | K6  | 43.95 | 121.81 | 0.8762886 | -        | 0.6704541.0.7733716 |
| Pitrm1  | Q8K411 | 494  | VEQYFK(*)NNQHK(*)              | K6  | 25.95 | 38.33  | -         | 1.089743 | 0.7727271.0.9312354 |
| Pitrm1  | Q8K411 | 488  | FLQEK(*)VEQYFK(*)              | K5  | 24.17 | 132.53 | 0.7835051 | 0.641025 | -0.7122654          |
| Pitrm1  | Q8K411 | 550  | GLELQTQSK(*)HQDASC(+57.02)LF   | K10 | 22    | 20.33  | 0.4536082 | 0.653846 | 2.2045451.1.104     |
| Mta1    | Q8K4B0 | 260  | HAMDTLHK(*)NIYDISK(*)          | K8  | 27.83 | 53.43  | 0.8989898 | 0.860215 | 1.0253161.0.9281738 |
| Svil    | Q8K4L3 | 982  | EVSTAK(*)SSLQENLDLK(*)         | K6  | 19.97 | 81.97  | 1.0531914 | -        | 1.5421681.1.2976801 |
| Colec12 | Q8K4Q8 | 430  | LVDSK(*)HGQLIK(*)              | K5  | 35.8  | 72.73  | -         | -        | 0.528301887         |
| Agpat4  | Q8K4X7 | 201  | GLPSLK(*)HHLLPR(*)             | K6  | 21.71 | 1000   | 1.5955056 | 2.511111 | 0.5966381.5677518   |
| Sf3a1   | Q8K4Z5 | 55   | NIVDK(*)TASFVAR(*)             | K5  | 81.11 | 1000   | -         | 0.974683 | 0.9780211.0.9763528 |
| Sf3a1   | Q8K4Z5 | 531  | AK(*)GLVPEDDTK(*)              | K2  | 29.74 | 62.82  | -         | 2.468354 | -                   |
| Sf3a1   | Q8K4Z5 | 715  | VQVPNMQDK(*)TEWK(*)            | K9  | 18.08 | 20.17  | -         | 1.645569 | -                   |
| Ahsa2   | Q8N9S3 | 156  | ALK(*)TEFTTGMLPTK(*)           | K3  | 33.53 | 186.68 | -         | 0.873015 | 1.2168671.0.0449417 |
| Acat1   | Q8QZT1 | 242  | GK(*)PDVVVK(*)EDEEYK(*)R(*)    | K2  | 62.99 | 71.75  | -         | 0.734177 | -                   |
| Acat1   | Q8QZT1 | 260  | VDFSK(*)VPK(*)                 | K5  | 48.95 | 56.34  | 1.0219780 | 0.670886 | 0.8160911.0.8363187 |
| Acat1   | Q8QZT1 | 265  | LK(*)TVFQK(*)                  | K2  | 48.61 | 91.35  | 1.2087912 | 0.810126 | 0.9310341.0.9833174 |
| Acat1   | Q8QZT1 | 121  | QATLGAGLPISTPC(+57.02)TTVNK(*) | K19 | 26.13 | 71.72  | 2.0219780 | -        | 0.5862061.3040925   |
| Acat1   | Q8QZT1 | 242  | GK(*)PDVVVK(*)                 | K2  | 10.03 | 69.64  | -         | 0.632911 | 1.2068961.0.919904  |
| IntS13  | Q8QZV7 | 167  | IIC(+57.02)ITNAK(*)SDSHVR(*)   | K8  | 5.65  | 1000   | 5.6071428 | -        | -                   |
| Eif3l   | Q8QZY1 | 494  | IQLLVFK(*)HK(*)                | K7  | 86.49 | 39.76  | 0.8       | 0.738095 | 0.9387751.0.8256236 |
| Eif3l   | Q8QZY1 | 237  | SVLNLVHSLVDK(*)SNINR(*)        | K12 | 60.63 | 1000   | 0.9684210 | -        | 0.7857141.0.8770677 |
| Eif3l   | Q8QZY1 | 61   | HK(*)TVSDLIDQK(*)              | K2  | 59.49 | 155.51 | 0.7473684 | -        | 0.8163261.0.7818475 |
| Eif3l   | Q8QZY1 | 237  | SLVDK(*)SNINR(*)               | K5  | 53.3  | 1000   | 1.2947368 | 1.035714 | 0.8061221.0.0455245 |
| Eif3l   | Q8QZY1 | 347  | TK(*)SMFQR(*)                  | K2  | 52.33 | 1000   | 0.8526315 | 0.761904 | 1.0714281.0.8953216 |
| Eif3l   | Q8QZY1 | 143  | HIYAK(*)VSGGPSLEQR(*)          | K5  | 47.48 | 1000   | 0.7684210 | 1.095238 | 0.5204081.0.7946891 |
| Eif3l   | Q8QZY1 | 534  | DMIHIADTK(*)VAR(*)             | K9  | 38.63 | 1000   | 1.2       | 0.833333 | 0.9897951.0.077098  |
| Eif3l   | Q8QZY1 | 356  | TTYK(*)YEMINK(*)               | K4  | 35.85 | 113.99 | 0.3473684 | 0.571428 | -0.4593985          |
| Rab38   | Q8QZZ8 | 105  | WK(*)NDLDSK(*)                 | K2  | 10.68 | 104.48 | -         | -        | -                   |

|        |        |      |                               |     |       |        |           |          |                    |
|--------|--------|------|-------------------------------|-----|-------|--------|-----------|----------|--------------------|
| Aimp2  | Q8R010 | 159  | VLSTVHTHSSVK(*)NVPENLVK(*)    | K12 | 85.95 | 85.91  | 1.1237113 | 0.769230 | 0.860215(0.9177191 |
| Aimp2  | Q8R010 | 190  | TLIWK(*)NVPK(*)               | K5  | 47.48 | 67.69  | 0.7938144 | 0.833333 | 1.139784(0.9223109 |
| Aimp2  | Q8R010 | 33   | LPNVHSK(*)TTSPATDAGHVQETSEPS  | K7  | 38.67 | 1000   | -         | -        | 0.387096774        |
| Blmh   | Q8R016 | 391  | DNQEGTFVK(*)WR(*)             | K9  | 48.87 | 1000   | -         | 1.194805 | -                  |
| Gspt1  | Q8R050 | 350  | TAGVK(*)HLIVLINK(*)           | K5  | 70.35 | 216.51 | 0.9890109 | 0.986111 | 0.977528(0.9842167 |
| Gspt1  | Q8R050 | 345  | EHAM(+15.99)LAK(*)TAGVK(*)    | K7  | 45.06 | 22.36  | -         | -        | 0.93258427         |
| Gspt1  | Q8R050 | 621  | DEGK(*)TIAIGK(*)              | K4  | 24.34 | 56.47  | -         | 1        | -                  |
| Gspt1  | Q8R050 | 585  | FK(*)QDQVC(+57.02)IAR(*)      | K3  | 17.6  | 1000   | 0.8021978 | 0.597222 | 0.730337(0.709919  |
| Hnrnpl | Q8R081 | 415  | SK(*)PGAAMVEMADGYAVDR(*)      | K2  | 88.66 | 1000   | 0.875     | 0.871794 | 0.966292(0.9043623 |
| Hnrnpl | Q8R081 | 490  | FSTPEQAAK(*)NR(*)             | K9  | 78.15 | 1000   | 0.8125    | 0.871794 | 0.977528(0.8872743 |
| Hnrnpl | Q8R081 | 62   | LK(*)TENAGDQHGGGGGGSGAAG      | K2  | 57.81 | 276.22 | 0.9791666 | 0.910256 | 0.831460(0.9069613 |
| Ilkap  | Q8R0F6 | 250  | YNEESQK(*)HAALSLSK(*)         | K7  | 37.54 | 78.17  | -         | -        | 1.138297872        |
| Nup133 | Q8R0G9 | 745  | LNK(*)SSMYSQEEVLGK(*)         | K3  | 77.35 | 279.2  | 0.7878787 | 1.1875   | 0.882978(0.9527858 |
| Nup133 | Q8R0G9 | 134  | IAVSPVTK(*)LSVC(+57.02)K(*)   | K8  | 43.36 | 53.48  | -         | 1.3125   | 0.553191(0.9328457 |
| Tada3  | Q8R0L9 | 109  | LEGK(*)TGHGPGPGPGR(*)PK(*)    | K4  | 78.43 | 155.24 | -         | 0.429577 | -                  |
| Tada3  | Q8R0L9 | 109  | LEGK(*)TGHGPGPGPGR(*)         | K4  | 42.33 | 1000   | -         | 0.471830 | -                  |
| Sgpl1  | Q8R0X7 | 431  | FLK(*)SELENIK(*)              | K3  | 60.77 | 124.87 | 0.4301075 | -        | 0.988764(0.7094358 |
| Sgpl1  | Q8R0X7 | 101  | DLVK(*)NMPFLK(*)              | K4  | 28.69 | 95.35  | 1.1827956 | 0.617283 | 0.764044(0.8547082 |
| Apeh   | Q8R146 | 131  | LK(*)SFNLSALEK(*)             | K2  | 27.55 | 130.84 | 0.8804347 | 1.15     | 1.119565(1.105     |
| Bud13  | Q8R149 | 47   | PGGAGGK(*)GMR(*)              | K7  | 61.61 | 1000   | 0.546875  | 0.692307 | -                  |
| Bud13  | Q8R149 | 446  | TAHMYSGAK(*)TGLVTDVQR(*)      | K9  | 36.97 | 1000   | -         | -        | 0.859375           |
| Bphl   | Q8R164 | 271  | LHLMPEGK(*)HNLHLR(*)          | K8  | 26.46 | 1000   | 1.1818181 | -        | 0.623762(0.9027903 |
| Dock7  | Q8R1A4 | 1687 | LTWLQNMAGK(*)HSER(*)          | K10 | 26.4  | 1000   | 1.0537634 | 2.605263 | 1.208791(1.6226059 |
| Dock7  | Q8R1A4 | 2070 | NK(*)SLIGPDQK(*)              | K2  | 11.78 | 102.9  | -         | -        | 0.813186813        |
| Dock7  | Q8R1A4 | 1668 | IAK(*)GYQTSPDLR(*)            | K3  | 8.5   | 1000   | -         | -        | 2.21978022         |
| Dock7  | Q8R1A4 | 233  | HK(*)ELFALHPSPDEEPIER(*)      | K2  | 6.81  | 1000   | -         | -        | 1.615384615        |
| Eif3c  | Q8R1B4 | 875  | VFDHK(*)QGTYYGYFR(*)          | K5  | 61.4  | 1000   | 0.9090909 | 1.2      | 0.969072(1.0260544 |
| Eif3c  | Q8R1B4 | 748  | MGDWK(*)TC(+57.02)HSFIINEK(*) | K5  | 58.6  | 79.67  | 0.8383838 | 0.6625   | 1.072164(0.8576829 |
| Eif3c  | Q8R1B4 | 511  | ILHTYYK(*)FDYK(*)             | K7  | 57.13 | 38.26  | 0.8989898 | 1.25     | 1.020618(1.0565362 |
| Eif3c  | Q8R1B4 | 551  | LC(+57.02)K(*)YIYAK(*)        | K3  | 44.18 | 82.34  | 0.8686868 | 0.425    | 1.051546(0.7817444 |
| Eif3c  | Q8R1B4 | 318  | MFAK(*)GTEITHAVVIK(*)         | K4  | 41.76 | 63.27  | 0.3535353 | -        | 0.804123(0.5788295 |
| Eif3c  | Q8R1B4 | 625  | QGLTK(*)DAHNALLDIQSSGR(*)     | K5  | 36.64 | 1000   | -         | -        | 1.020618557        |
| Eif3c  | Q8R1B4 | 710  | MISK(*)QFHHQLR(*)             | K4  | 34.97 | 1000   | 0.8080808 | 0.675    | 0.865979(0.7830201 |
| Niban2 | Q8R1F1 | 513  | LAPTC(+57.02)K(*)SELPR(*)     | K6  | 73.44 | 1000   | 1.1290322 | 1.0625   | 1.142857(1.1114631 |

|          |        |     |                                    |       |        |           |          |                    |
|----------|--------|-----|------------------------------------|-------|--------|-----------|----------|--------------------|
| Niban2   | Q8R1F1 | 203 | HC(+57.02)NNGIPENSK(*)VEGPAFT K11  | 34.71 | 1000   | -         | -        | 1.846153846        |
| Niban2   | Q8R1F1 | 330 | AFILPK(*)AEVC(+57.02)VR(*) K6      | 24.56 | 1000   | -         | 22.925   | 4.714285;13.819643 |
| Rpp40    | Q8R1F9 | 19  | HLLVC(+57.02)EK(*)SNFGHDK(*) K7    | 44.73 | 100.91 | 0.6415094 | -        | 1.161290;0.9013999 |
| Pdlim2   | Q8R1G6 | 333 | GHFWVGNELYC(+57.02)EK(*)HAR(*) K13 | 77.62 | 1000   | 1.1917808 | 1.027397 | 1.023529;1.0809025 |
| Dync1li1 | Q8R1Q8 | 80  | NVLLLGEDGAGK(*)TSLIR(*) K12        | 51.79 | 1000   | 0.9659090 | 0.895522 | 0.967391;0.9429409 |
| Dync1li1 | Q8R1Q8 | 68  | LPTGK(*)NVLLLGEDGAGK(*) K5         | 33.53 | 68.35  | 1.4204545 | 1.283582 | 0.75 1.1513455     |
| Tmed4    | Q8R1V4 | 218 | HLK(*)SFFEAK(*) K3                 | 85.07 | 134.33 | 1.1466666 | 0.936708 | 0.882352;0.9885762 |
| Ctbs     | Q8R242 | 95  | GDISLK(*)NIIDPTFR(*) K6            | 10.07 | 1000   | -         | -        | 1.119402985        |
| Utp4     | Q8R2N2 | 321 | VEVK(*)NYDAALR(*) K4               | 47.73 | 1000   | 0.5963302 | 1.058823 | 0.727272;0.7941422 |
| Seh1l    | Q8R2U0 | 12  | SIAADHK(*)DLIHDVSDFHGR(*) K7       | 57    | 1000   | 0.9494949 | -        | 0.934065;0.9417804 |
| Seh1l    | Q8R2U0 | 54  | SESGDWHC(+57.02)TASWK(*)THSC K13   | 40.66 | 1000   | 0.7373737 | -        | -                  |
| Ubqln1   | Q8R317 | 61  | FK(*)SHIDQLVLIFAGK(*) K2           | 46.55 | 229.43 | -         | -        | 1.180851064        |
| Cdc16    | Q8R349 | 556 | TLK(*)NIISPPWDFR(*) K3             | 42.59 | 1000   | 0.5876288 | -        | 0.795698;0.6916639 |
| Commd5   | Q8R395 | 62  | LVVGALHGK(*)DC(+57.02)R(*) K9      | 25.03 | 1000   | -         | 1.394366 | -                  |
| Rbm19    | Q8R3C6 | 727 | IK(*)NLNFSTTEETLK(*) K2            | 28.25 | 150.01 | 0.79      | 1.160493 | 0.542553;0.8310157 |
| Rbm19    | Q8R3C6 | 744 | GVFSK(*)VGAIK(*) K5                | 10.8  | 52.68  | -         | 0.530864 | -                  |
| Rbm19    | Q8R3C6 | 533 | YNATK(*)SQVFDHETR(*) K5            | 9.79  | 1000   | 0.84      | -        | -                  |
| Ppp1r8   | Q8R3G1 | 78  | VHAALVYHK(*)HLK(*) K9              | 49.33 | 56.34  | 1.2584269 | 1.680555 | 1.279569;1.4061841 |
| Mterf3   | Q8R3J4 | 181 | LDFEK(*)HIK(*) K5                  | 50.85 | 29.32  | -         | -        | -                  |
| Thoc1    | Q8R3N6 | 133 | SNTFYSAGK(*)NYLLR(*) K9            | 38.33 | 1000   | -         | -        | 0.556962025        |
| Thoc1    | Q8R3N6 | 124 | NVATWK(*)SNTFYSAGK(*) K6           | 23.87 | 57.7   | 2.1204819 | -        | 2.620253;2.3703675 |
| Thoc1    | Q8R3N6 | 258 | ISWK(*)TFLK(*) K4                  | 21.48 | 52.86  | 1.2771084 | -        | 0.810126;1.0436175 |
| Ccdc58   | Q8R3Q6 | 72  | VIK(*)NC(+57.02)IAQTSAVVK(*) K3    | 55.9  | 254.74 | 0.8080808 | 0.6625   | 0.915789;0.7954568 |
| Exoc1    | Q8R3S6 | 5   | T(+42.01)AIK(*)HALQR(*) K4         | 54.35 | 1000   | 1.0504201 | 0.805194 | 0.913978;0.9231978 |
| Cd109    | Q8R422 | 473 | TYIQLK(*)TR(*) K6                  | 43.61 | 1000   | 1.3595505 | -        | 0.943820;1.1516854 |
| Nup85    | Q8R480 | 92  | IEEELSGK(*)SR(*) K8                | 56.94 | 1000   | -         | 0.894736 | 0.911111;0.902924  |
| Nup85    | Q8R480 | 631 | LQDDDIETTK(*)VEMLR(*) K10          | 46.75 | 1000   | 0.7526881 | -        | 0.866666;0.8096774 |
| Lrrc8c   | Q8R502 | 550 | ILSIK(*)SNVSK(*) K5                | 31.9  | 29.88  | -         | 0.578947 | 0.802469;0.6907083 |
| Snap47   | Q8R570 | 274 | FIGK(*)PDVAYQLISAK(*) K4           | 20.53 | 151.94 | -         | -        | 1.213333333        |
| Prpsap2  | Q8R574 | 70  | GK(*)DVFIQTISK(*) K2               | 46.86 | 137.5  | 1.5316455 | -        | 1.152941;1.3422934 |
| Actr1b   | Q8R5C5 | 285 | AIHK(*)SDMDLR(*) K4                | 28.19 | 1000   | 0.6829268 | -        | 1.914634;1.2987805 |
| Usp15    | Q8R5H1 | 125 | VVEQGMFVK(*)HC(+57.02)K(*) K9      | 55.13 | 57.45  | 0.8865979 | 0.646341 | 1 0.8443131        |
| Usp15    | Q8R5H1 | 21  | SDIATLLK(*)TSLR(*) K8              | 52.78 | 1000   | 0.9278350 | 1.341463 | 0.688888;0.9860625 |
| Usp15    | Q8R5H1 | 128 | HC(+57.02)K(*)VEVYLTELK(*) K3      | 36.66 | 140.59 | -         | -        | 1                  |



|        |        |      |                                |     |       |        |           |          |           |           |
|--------|--------|------|--------------------------------|-----|-------|--------|-----------|----------|-----------|-----------|
| Usp15  | Q8R5H1 | 125  | K(*)VVEQGMFVK(*)HC(+57.02)K(*) | K10 | 25.48 | 62.26  | 1.0412371 | 0.841463 | 1.1666666 | 1.0164557 |
| Usp15  | Q8R5H1 | 363  | AFK(*)TQVGR(*)                 | K3  | 13.31 | 1000   | 0.9278350 | 0.743902 | 1.2444444 | 0.9720606 |
| Tmx1   | Q8VBT0 | 82   | VAK(*)VDVTEQTGLSGR(*)          | K3  | 58.15 | 1000   | 1.1967213 | 0.951612 | 0.9625    | 1.0369447 |
| Banp   | Q8VBU8 | 283  | EVQAVSNLSGQGK(*)HGK(*)         | K13 | 63.54 | 27.07  | -         | 1.383333 | -         | -         |
| Banp   | Q8VBU8 | 339  | GQSLAVK(*)SFSR(*)              | K7  | 50.34 | 1000   | -         | 0.633333 | -         | -         |
| Clptm1 | Q8VBZ3 | 460  | DK(*)STYIESSTK(*)              | K2  | 22.29 | 142.42 | 0.8850574 | 1.142857 | 1.417721  | 1.1485454 |
| Clptm1 | Q8VBZ3 | 534  | LK(*)SVAHLPWR(*)               | K2  | 12.7  | 1000   | -         | -        | 1.126582  | 278       |
| Kctd5  | Q8VC57 | 155  | ISQMPVK(*)HVYR(*)              | K7  | 9.32  | 1000   | -         | -        | 3.855421  | 1687      |
| Rbms2  | Q8VC70 | 93   | AILDK(*)TTNK(*)                | K5  | 60.31 | 38.26  | -         | 0.886075 | 0.978021  | 0.932049  |
| Rbms2  | Q8VC70 | 18   | PGISTFGYNK(*)NNK(*)            | K10 | 34.08 | 49.37  | -         | -        | 0.725274  | 725       |
| Rbms2  | Q8VC70 | 83   | LC(+57.02)QPYGK(*)IVSTK(*)     | K7  | 32.91 | 56.94  | 0.9893617 | 1.025316 | -         | 1.0073391 |
| Ndc1   | Q8VCB1 | 638  | ASLK(*)TAIYR(*)                | K4  | 27.5  | 1000   | 0.7009345 | 0.932432 | -         | 0.8166835 |
| Tubg2  | Q8VCK3 | 301  | LLQPK(*)NVMVSTGR(*)            | K5  | 50.31 | 1000   | -         | -        | -         | -         |
| Med9   | Q8VCS6 | 124  | TK(*)NELLOK(*)                 | K2  | 57.58 | 156.85 | 0.7623762 | 0.720930 | 0.956521  | 0.8132761 |
| Acsf2  | Q8VCW8 | 296  | MPTK(*)TAEELR(*)               | K4  | 33.36 | 1000   | 1.5113636 | 2.886075 | 2.697916  | 2.3651188 |
| Acsf2  | Q8VCW8 | 182  | QFK(*)TQQYYDILK(*)             | K3  | 13.19 | 114.67 | 1.6477272 | 1.088607 | -         | 1.3681674 |
| Utp6   | Q8VCY6 | 563  | EELNHPFGK(*)PENC(+57.02)GQIYM  | K9  | 43.64 | 1000   | -         | -        | 0.701030  | 928       |
| Utp6   | Q8VCY6 | 227  | IYK(*)NSISK(*)                 | K4  | 36.47 | 29.96  | 1.0795454 | -        | -         | -         |
| Utp6   | Q8VCY6 | 499  | AVFK(*)SLQESR(*)               | K4  | 10.49 | 1000   | 1.0227272 | -        | -         | -         |
| Pik3r4 | Q8VD65 | 993  | GLLVAHLHEHK(*)SAVNR(*)         | K11 | 20.08 | 1000   | 1.6465517 | -        | 1.125     | 1.3857759 |
| Hip1   | Q8VD75 | 531  | TQEQQDVLENLK(*)HELATSR(*)      | K12 | 10.08 | 1000   | -         | -        | 1.545454  | 545       |
| Myh9   | Q8VDD5 | 1024 | NK(*)HEAMITDLEER(*)            | K2  | 99.29 | 1000   | 0.9489795 | 0.936708 | 0.934065  | 0.9399181 |
| Myh9   | Q8VDD5 | 760  | IGQSK(*)VFFR(*)                | K5  | 98.37 | 1000   | 0.8571428 | 0.911392 | 0.923076  | 0.8972041 |
| Myh9   | Q8VDD5 | 860  | EK(*)HLAAENR(*)                | K2  | 97.12 | 1000   | 0.8979591 | 0.848101 | 0.857142  | 0.8677344 |
| Myh9   | Q8VDD5 | 1181 | TLEDEAK(*)THEAQIQEMR(*)        | K7  | 95.92 | 1000   | 1.0306122 | 0.924050 | 0.945054  | 0.9665726 |
| Myh9   | Q8VDD5 | 1099 | VEEEAAQK(*)NMALK(*)            | K8  | 95.57 | 142.99 | 0.9489795 | 1.164556 | 0.769230  | 0.9609224 |
| Myh9   | Q8VDD5 | 1775 | SHAQK(*)NENAR(*)               | K5  | 94.65 | 1000   | 0.9081632 | 0.886075 | 0.978021  | 0.9240871 |
| Myh9   | Q8VDD5 | 580  | VDYK(*)ADEWLMLK(*)             | K4  | 90.33 | 146.43 | 0.8571428 | 0.873417 | 0.945054  | 0.8918718 |
| Myh9   | Q8VDD5 | 1338 | QMEDEK(*)NSFR(*)               | K6  | 89.76 | 1000   | 0.8265306 | 1.075949 | 0.681318  | 0.8612662 |
| Myh9   | Q8VDD5 | 565  | DK(*)ADFC(+57.02)IIHYAGK(*)    | K2  | 87.59 | 281.19 | 0.9285714 | 0.886075 | 0.813186  | 0.8759447 |
| Myh9   | Q8VDD5 | 1193 | QK(*)HSQAVEELADQLEQTK(*)       | K2  | 87.26 | 360.06 | 1.0102040 | 0.911392 | 0.846153  | 0.9225834 |
| Myh9   | Q8VDD5 | 576  | ADFC(+57.02)IIHYAGK(*)VDYK(*)  | K11 | 83.63 | 109.97 | 0.9591836 | 1.063291 | 0.780219  | 0.9342315 |
| Myh9   | Q8VDD5 | 1806 | YK(*)ASIAALEAK(*)              | K2  | 81.95 | 143.22 | 0.8571428 | 0.873417 | 0.945054  | 0.8918718 |
| Myh9   | Q8VDD5 | 407  | AQTK(*)EQADFAIEALAK(*)         | K4  | 80.87 | 220.17 | 0.9489795 | -        | 1         | 0.9744898 |

|       |        |      |                                 |     |       |        |           |          |          |           |
|-------|--------|------|---------------------------------|-----|-------|--------|-----------|----------|----------|-----------|
| Myh9  | Q8VDD5 | 1518 | DDVGK(*)SVHELEK(*)              | K5  | 78.11 | 136.94 | 0.8265306 | 0.898734 | 0.923076 | 0.8827806 |
| Myh9  | Q8VDD5 | 228  | TVK(*)NDNSSR(*)                 | K3  | 77.68 | 1000   | 0.8775510 | -        | 1.054945 | 0.966248  |
| Myh9  | Q8VDD5 | 737  | GFMDGK(*)QAC(+57.02)VLMIK(*)    | K6  | 74.93 | 216.51 | 0.9285714 | 0.797468 | 1.021978 | 0.9160059 |
| Myh9  | Q8VDD5 | 1410 | VAAYDK(*)LEK(*)                 | K6  | 70.96 | 37.81  | 0.9183673 | 1.075949 | -        | 0.9971584 |
| Myh9  | Q8VDD5 | 1513 | TEMEDLMSSK(*)DDVGK(*)           | K10 | 66.49 | 67.85  | 0.9591836 | 1.936708 | 1.164835 | 1.3535759 |
| Myh9  | Q8VDD5 | 1802 | LQEM(+15.99)ESAVK(*)SK(*)       | K9  | 65.05 | 22.85  | 1.1224489 | 1.430379 | 0.736263 | 1.0963642 |
| Myh9  | Q8VDD5 | 555  | VVQEQGTHPK(*)FQK(*)             | K10 | 61.82 | 55.63  | 0.8775510 | 0.797468 | 0.802197 | 0.8257391 |
| Myh9  | Q8VDD5 | 576  | DK(*)ADFC(+57.02)IIHYAGK(*)VDYK | K13 | 60.85 | 63.97  | 0.8571428 | 0.569620 | 0.835164 | 0.753976  |
| Myh9  | Q8VDD5 | 1022 | LK(*)NK(*)HEAMITDLEER(*)        | K2  | 60.45 | 20.41  | 1.0918367 | 1.151898 | 0.824175 | 1.0226371 |
| Myh9  | Q8VDD5 | 1274 | TELADK(*)VTK(*)                 | K6  | 59.62 | 49.37  | 0.9387755 | 1.392405 | 0.780219 | 1.0371335 |
| Myh9  | Q8VDD5 | 435  | INK(*)ALDK(*)                   | K3  | 59.31 | 87.62  | 0.5       | -        | 0.945054 | 0.7225275 |
| Myh9  | Q8VDD5 | 1193 | QK(*)HSQAVEELADQLEQTK(*)R(*)    | K2  | 55.16 | 123.66 | -         | 0.860759 | 0.923076 | 0.8919182 |
| Myh9  | Q8VDD5 | 545  | SFVEK(*)VVQEQGTHPK(*)           | K5  | 51.2  | 142.63 | 0.6530612 | 0.430379 | 0.835164 | 0.6395353 |
| Myh9  | Q8VDD5 | 835  | VK(*)PLLNSIR(*)                 | K2  | 50.64 | 1000   | 0.4285714 | 0.493670 | 0.714285 | 0.5455093 |
| Myh9  | Q8VDD5 | 1631 | DLEAHIDTANK(*)NR(*)             | K11 | 47.66 | 1000   | -         | -        | 0.813186 | 0.813     |
| Myh9  | Q8VDD5 | 82   | FSK(*)VEDM(+15.99)AELTC(+57.02) | K3  | 45.6  | 172.72 | -         | -        | 1.076923 | 0.77      |
| Myh9  | Q8VDD5 | 810  | QQQLTAMK(*)VLQR(*)              | K8  | 45.52 | 1000   | 1.1530612 | 0.721518 | 1.219780 | 1.0314535 |
| Myh9  | Q8VDD5 | 856  | EAELTK(*)VJR(*)                 | K6  | 38.72 | 1000   | 0.5816326 | 1.037974 | 0.725274 | 0.7816274 |
| Myh9  | Q8VDD5 | 682  | AGK(*)LDPHLVLDQLR(*)            | K3  | 36.21 | 1000   | -         | -        | 0.934065 | 0.934     |
| Myh9  | Q8VDD5 | 833  | LFTK(*)VK(*)PLLNSIR(*)          | K4  | 35.37 | 55.92  | 0.9591836 | 0.531645 | 0.725274 | 0.7387013 |
| Myh9  | Q8VDD5 | 289  | LLSGAGEHLK(*)TDLLLEPYNK(*)      | K10 | 31.66 | 141.74 | 1.6326530 | -        | 1.329670 | 1.4811617 |
| Myh9  | Q8VDD5 | 199  | LAHVASSHK(*)SK(*)               | K9  | 31.55 | 30.83  | 0.6734693 | -        | 1.021978 | 0.8477237 |
| Myh9  | Q8VDD5 | 38   | LVWVPSSK(*)NGFEPASLK(*)         | K8  | 20.7  | 35.44  | 1.0306122 | 1.240506 | -        | 1.1355593 |
| Myh9  | Q8VDD5 | 1477 | EK(*)ETK(*)ALSLAR(*)            | K5  | 16.14 | 53.53  | -         | 0.772151 | 0.912087 | 0.8421199 |
| Myh9  | Q8VDD5 | 637  | IIGLDQVAGMSETALPGAFK(*)TR(*)    | K20 | 15.92 | 1000   | -         | -        | 2.252747 | 2.253     |
| Phip  | Q8VDD9 | 773  | ILTVSK(*)NHAHEHFLDLGDSK(*)      | K6  | 43.01 | 37.92  | -         | 0.850574 | -        |           |
| Phip  | Q8VDD9 | 1533 | AFVSK(*)TNTSAMP GK(*)           | K5  | 20.92 | 140.79 | -         | -        | 3.021052 | 3.022     |
| Phip  | Q8VDD9 | 116  | SC(+57.02)K(*)HVWWK(*)          | K3  | 19.16 | 100.21 | -         | 0.942528 | 1.168421 | 1.0554749 |
| Uhrf1 | Q8VDF2 | 404  | DWGGK(*)GMAC(+57.02)VGR(*)      | K4  | 61.57 | 1000   | 0.7582417 | 0.623376 | 0.808988 | 0.7302024 |
| Uhrf1 | Q8VDF2 | 564  | YDGIYK(*)VVK(*)                 | K6  | 41.5  | 20.7   | 0.8131868 | -        | 1.011235 | 0.9122114 |
| Uhrf1 | Q8VDF2 | 24   | LTK(*)VQELR(*)                  | K3  | 4.67  | 1000   | -         | -        | 0.528089 | 0.528     |
| Parn  | Q8VDG3 | 319  | LLDTK(*)LMASTQPFK(*)            | K5  | 36.01 | 161.52 | 0.9787234 | -        | 0.663551 | 0.8211374 |
| Ppcs  | Q8VDG5 | 46   | VVLITSGGK(*)VPLEAR(*)           | K10 | 62.29 | 1000   | 2.5       | -        | 1.895833 | 2.1979167 |
| Hdlbp | Q8VDJ3 | 726  | QTK(*)SFTVDIR(*)                | K3  | 85.58 | 1000   | -         | -        | 7.395604 | 7.396     |

|          |        |      |                                |     |       |        |           |           |           |           |
|----------|--------|------|--------------------------------|-----|-------|--------|-----------|-----------|-----------|-----------|
| Hdlbp    | Q8VDJ3 | 477  | IPPDSEK(*)SNLIR(*)             | K7  | 79.05 | 1000   | 0.9090909 | 0.7625    | 0.791208  | 0.8209332 |
| Hdlbp    | Q8VDJ3 | 445  | MDYVEINIDHK(*)FHR(*)           | K11 | 72.88 | 1000   | 1.2424242 | 1.05      | 1.219780  | 1.1707348 |
| Hdlbp    | Q8VDJ3 | 453  | HLIGK(*)SGANINR(*)             | K5  | 70.54 | 1000   | 0.8484848 | 0.8375    | 0.967032  | 0.8843393 |
| Hdlbp    | Q8VDJ3 | 1066 | YHPK(*)IIGR(*)                 | K4  | 56.63 | 1000   | -         | -         | 0.8131868 | 13        |
| Hdlbp    | Q8VDJ3 | 510  | TK(*)DLIIEQR(*)                | K2  | 53.89 | 1000   | 0.9494949 | 0.775     | 0.780219  | 0.8349049 |
| Hdlbp    | Q8VDJ3 | 594  | QFHK(*)NIIGK(*)                | K4  | 48.27 | 76.42  | 0.9292929 | 0.95      | 1.263736  | 1.0476764 |
| Hdlbp    | Q8VDJ3 | 599  | NIIGK(*)GGANIK(*)              | K5  | 45.19 | 86.11  | 0.7979797 | 1.025     | 0.791208  | 0.8713962 |
| Hdlbp    | Q8VDJ3 | 179  | LQDLELK(*)TATK(*)              | K7  | 30.38 | 20.17  | 0.9595959 | -         | -         |           |
| Hdlbp    | Q8VDJ3 | 846  | SGTQSDK(*)VTLK(*)              | K7  | 26.08 | 55.36  | -         | 1.375     | 0.901098  | 1.1380495 |
| Hdlbp    | Q8VDJ3 | 90   | YK(*)DMNQFGEQEQAQ(*)           | K2  | 14.79 | 83.6   | -         | -         | 2.252747  | 253       |
| Hdlbp    | Q8VDJ3 | 466  | IK(*)DQYK(*)VSVR(*)            | K6  | 12.41 | 58.99  | -         | -         | 0.857142  | 857       |
| Zgpat    | Q8VDM1 | 352  | GK(*)SLDQC(+57.02)AEILQK(*)    | K2  | 54.65 | 164.78 | -         | -         | -         |           |
| Psm2     | Q8VDM4 | 350  | VPDDIYK(*)THLENNR(*)           | K7  | 69.96 | 1000   | 0.9680851 | 0.8375    | 0.956043  | 0.920543  |
| Psm2     | Q8VDM4 | 773  | LAQGLTHLGK(*)GTLTLC(+57.02)PYI | K10 | 37.28 | 1000   | -         | -         | 0.978021  | 978       |
| Psm2     | Q8VDM4 | 754  | QLAQYHAK(*)DPNNLFMVR(*)        | K8  | 33.09 | 1000   | 0.8191489 | -         | 1.494505  | 1.1568272 |
| Psm2     | Q8VDM4 | 860  | PK(*)TITGFQTHHTPVLLAHGER(*)    | K2  | 21.9  | 1000   | 0.8085106 | -         | 1.197802  | 1.0031564 |
| Hnrnpul1 | Q8VDM6 | 441  | TTWAIK(*)HAASNPSK(*)           | K6  | 79.92 | 170.86 | 0.7979797 | 0.7333333 | 0.884210  | 0.8051746 |
| Hnrnpul1 | Q8VDM6 | 376  | VLVK(*)NC(+57.02)AVEFNFGQR(*)  | K4  | 43.97 | 1000   | -         | 0.9466666 | 0.831578  | 0.8891228 |
| Hnrnpul1 | Q8VDM6 | 271  | INEEISVK(*)HLPSTEPDPHVVR(*)    | K8  | 22.92 | 1000   | -         | 1.5866666 | -         |           |
| Hnrnpul1 | Q8VDM6 | 419  | SK(*)AEC(+57.02)EILMMVGLPAAGK  | K2  | 7.81  | 90.71  | -         | -         | 1.915789  | 474       |
| Atp1a1   | Q8VDN2 | 476  | YSK(*)IVEIPFNSTNK(*)           | K3  | 61.93 | 160.69 | 0.84375   | 0.8       | 0.869565  | 0.8377717 |
| Atp1a1   | Q8VDN2 | 502  | NPNASEPK(*)HLLVMK(*)           | K8  | 55.27 | 134.33 | 0.9479166 | 0.8875    | 0.880434  | 0.9052838 |
| Atp1a1   | Q8VDN2 | 156  | SSK(*)IMESFK(*)                | K3  | 5     | 56.47  | -         | -         | 0.913043  | 478       |
| Ccar2    | Q8VDP4 | 557  | IYK(*)TLLSLPEK(*)              | K3  | 37.79 | 150.63 | -         | 1         | 0.649484  | 0.8247423 |
| Mitd1    | Q8VDV8 | 64   | TK(*)ISGYMDR(*)                | K2  | 26.77 | 1000   | -         | -         | 0.741007  | 194       |
| Ddx39a   | Q8VDW0 | 190  | NVK(*)HFVLDEC(+57.02)DK(*)     | K3  | 93.31 | 242.72 | 0.9450549 | 0.921052  | 1.022222  | 0.9627766 |
| Ddx39a   | Q8VDW0 | 383  | FGTK(*)GLAVTFVSDENDAK(*)       | K4  | 5.15  | 132.96 | -         | -         | 1.144444  | 4444      |
| Naa40    | Q8VE10 | 28   | AAMDAVC(+57.02)AK(*)VDAANR(*)  | K9  | 11.87 | 1000   | 1.1570247 | -         | -         |           |
| Pdcd10   | Q8VE70 | 172  | YSK(*)SFSDTLK(*)               | K3  | 67.79 | 51.17  | -         | -         | 1.344086  | 022       |
| Pdcd10   | Q8VE70 | 179  | SFSDTLK(*)TYFK(*)              | K7  | 9.53  | 68.07  | -         | -         | 0.860215  | 054       |
| Cul7     | Q8VE73 | 1160 | YYVLQK(*)SSSELFGPR(*)          | K6  | 38.62 | 1000   | 0.475     | -         | -         |           |
| Rpe      | Q8VEE0 | 159  | FMEDMMPK(*)VHWLR(*)            | K8  | 48.93 | 1000   | -         | -         | 1.075268  | 817       |
| Rpa1     | Q8VEE4 | 268  | VYYFSK(*)GALK(*)               | K6  | 52.36 | 35.82  | 1.1595744 | 0.271604  | 0.821052  | 0.750744  |
| Rpa1     | Q8VEE4 | 176  | GK(*)PAGTGLLQPSGGTQSK(*)       | K2  | 48.03 | 139.37 | 1.0851063 | 0.851851  | 1.031578  | 0.9895124 |

|         |        |     |                                 |     |       |        |           |          |          |             |
|---------|--------|-----|---------------------------------|-----|-------|--------|-----------|----------|----------|-------------|
| Rpa1    | Q8VEE4 | 458 | TLHEAK(*)SENLGQGDK(*)           | K6  | 38.53 | 66.16  | -         | 1.172839 | 0.873684 | 1.0232619   |
| Rpa1    | Q8VEE4 | 322 | AK(*)DALVDIIGIC(+57.02)K(*)     | K2  | 29.3  | 267.5  | 0.9255319 | 1.123456 | 0.873684 | 0.9742243   |
| Nle1    | Q8VEJ4 | 153 | FWDLSTETPHFTC(+57.02)K(*)GHR(   | K14 | 39.57 | 1000   | 1.0853658 | 1.405405 | 0.964285 | 1.1516857   |
| Vps4a   | Q8VEJ9 | 210 | LVK(*)NLFELAR(*)                | K3  | 38.43 | 1000   | -         | -        | 0.74     |             |
| Hnrnpu  | Q8VEK3 | 328 | HLYTK(*)DIDIHEVR(*)             | K5  | 96.38 | 1000   | 0.9670329 | 0.857142 | 0.977777 | 0.9339845   |
| Hnrnpu  | Q8VEK3 | 363 | GIK(*)TC(+57.02)NC(+57.02)ETEDY | K3  | 94.61 | 284.27 | 0.9120879 | 0.714285 | 1.044444 | 0.8902727   |
| Hnrnpu  | Q8VEK3 | 541 | APQC(+57.02)LGK(*)FIEIAAR(*)    | K7  | 90.52 | 1000   | 1.0109890 | 0.610389 | 0.911111 | 0.8441632   |
| Hnrnpu  | Q8VEK3 | 309 | GK(*)VC(+57.02)FEMK(*)          | K2  | 80.41 | 156.85 | 0.9230769 | 0.974025 | 1.122222 | 1.0064417   |
| Hnrnpu  | Q8VEK3 | 181 | EAAGK(*)SSGPTSLFAVTVAPPGAR(*)   | K5  | 76.75 | 1000   | 1.0329670 | 0.935064 | 0.788888 | 0.9189736   |
| Hnrnpu  | Q8VEK3 | 486 | IGLPGAGK(*)TTWVTK(*)            | K8  | 72.03 | 42.99  | 0.6813186 | 0.727272 | 1.044444 | 0.8176786   |
| Hnrnpu  | Q8VEK3 | 673 | SGK(*)NQFNR(*)                  | K3  | 68.79 | 1000   | -         | 0.519480 | 0.877777 | 0.6986291   |
| Hnrnpu  | Q8VEK3 | 492 | TTWVTK(*)HAAENPGK(*)            | K6  | 58.97 | 171.6  | 2.8461538 | 0.844155 | 1.433333 | 1.707881    |
| Hnrnpu  | Q8VEK3 | 486 | K(*)DC(+57.02)EVVMMIGLPGAGK(    | K16 | 58.59 | 55.13  | 0.4505494 | 1.077922 | 0.955555 | 0.828009    |
| Hnrnpu  | Q8VEK3 | 486 | MIGLPGAGK(*)TTWVTK(*)           | K9  | 56.55 | 45.03  | 0.9230769 | -        | 0.977777 | 0.9504274   |
| Hnrnpu  | Q8VEK3 | 31  | GLK(*)ADLMDR(*)                 | K3  | 49.36 | 1000   | 0.8241758 | 1.662337 | 0.944444 | 1.1436526   |
| Hnrnpu  | Q8VEK3 | 500 | HAAENPGK(*)YNILGTNTIMDK(*)      | K8  | 33.94 | 35.28  | -         | 3.220779 | -        |             |
| Hnrnpu  | Q8VEK3 | 541 | GK(*)FIEIAAR(*)                 | K2  | 24.55 | 1000   | 1.0769230 | 0.805194 | -        | 0.9410589   |
| Hnrnpu  | Q8VEK3 | 440 | EK(*)PYFPIPEDC(+57.02)TFIQNVPLI | K2  | 23.64 | 1000   | -         | -        | 1.4      |             |
| Ing3    | Q8VEK6 | 403 | GK(*)WFC(+57.02)PQC(+57.02)TAA  | K2  | 41.99 | 158.53 | -         | -        | -        |             |
| Ing3    | Q8VEK6 | 264 | NNDFQLGK(*)EFSIPR(*)            | K8  | 28.89 | 1000   | -         | -        | -        |             |
| Ing3    | Q8VEK6 | 167 | FK(*)SEALLSTLTSDASK(*)          | K2  | 15.68 | 148.34 | -         | -        | -        |             |
| Slc25a3 | Q8VEM8 | 308 | GVWK(*)GLFAR(*)                 | K4  | 95.28 | 1000   | 0.6938775 | 0.692307 | 0.903225 | 0.763137    |
| Slc25a3 | Q8VEM8 | 213 | YK(*)GVAPLWMR(*)                | K2  | 69.87 | 1000   | 0.7244897 | 0.769230 | 0.763440 | 0.7523871   |
| Rbm39   | Q8VH51 | 291 | SK(*)GYGFITFSDSEC(+57.02)AK(*)  | K2  | 34.49 | 189.02 | 1.125     | -        | 1.152173 | 1.138587    |
| Sec63   | Q8VHE0 | 407 | IK(*)TIQDLVSLK(*)               | K2  | 35.52 | 124.12 | 0.7179487 | 0.835294 | 0.913978 | 0.8224071   |
| Sec63   | Q8VHE0 | 633 | SK(*)ITHPVYSLYFPEEK(*)          | K2  | 13.07 | 64.77  | -         | 1.247058 | -        |             |
| Agap3   | Q8VHH5 | 139 | VGIVGNLSSGK(*)SALVHR(*)         | K11 | 23.37 | 1000   | -         | -        | 0.786885 | 0.786885246 |
| Pofut2  | Q8VHI3 | 71  | VASLLK(*)TLLK(*)                | K6  | 49.84 | 49.79  | 0.7961165 | -        | 0.954545 | 0.875331    |
| Pofut2  | Q8VHI3 | 244 | SMVFAK(*)HLR(*)                 | K6  | 38.61 | 1000   | 0.9514563 | 0.845238 | -        | 0.8983472   |
| Pofut2  | Q8VHI3 | 171 | VDAR(*)PC(+57.02)IDPLLYSQDK(*)I | K16 | 37.27 | 1000   | 1.3300970 | -        | -        |             |
| Pofut2  | Q8VHI3 | 171 | PC(+57.02)IDPLLYSQDK(*)HEYR(*)  | K12 | 8.15  | 1000   | -         | -        | 1.272727 | 1.272727273 |
| Dhx36   | Q8VHK9 | 855 | VHTK(*)SDGLVSIHPK(*)            | K4  | 36.79 | 124.32 | 0.7191011 | 1.013333 | 0.580645 | 0.7710265   |
| Slc14a1 | Q8VHL0 | 361 | MPLSK(*)VTYSEENR(*)             | K5  | 45.06 | 1000   | -         | 0.627272 | 1.113636 | 0.8704545   |
| Gatad2b | Q8VHR5 | 463 | LK(*)NAFVK(*)                   | K2  | 27.26 | 81.69  | -         | -        | 1.3625   |             |

|        |        |      |                                      |     |       |        |           |          |          |             |
|--------|--------|------|--------------------------------------|-----|-------|--------|-----------|----------|----------|-------------|
| Flnc   | Q8VHX6 | 2686 | TPC(+57.02)EEVYVK(*)HMGNR(*)         | K9  | 93.36 | 1000   | 0.9555555 | 0.932432 | 0.988372 | 0.9587867   |
| Flnc   | Q8VHX6 | 2464 | VHTPSGAVEEC(+57.02)YVSELDSDK(        | K20 | 93.07 | 1000   | 1.2444444 | 0.945945 | 1.046511 | 1.0789673   |
| Flnc   | Q8VHX6 | 1936 | FDDK(*)HIPGSPFTAK(*)                 | K4  | 89.97 | 94.89  | 1.0333333 | 0.878378 | 0.918604 | 0.9434388   |
| Flnc   | Q8VHX6 | 2118 | FADK(*)HVPGPSFTVK(*)                 | K4  | 86.97 | 152.36 | 0.9555555 | 0.797297 | 0.906976 | 0.8866099   |
| Flnc   | Q8VHX6 | 1368 | AFGPGLEGGLVNN(*)ANR(*)               | K13 | 84.01 | 1000   | 1.0333333 | 0.756756 | -        | 0.895045    |
| Flnc   | Q8VHX6 | 1832 | YAPTEK(*)GLHQMGIK(*)                 | K6  | 65.51 | 102.06 | 1.0777777 | 0.932432 | 0.918604 | 0.9762716   |
| Flnc   | Q8VHX6 | 503  | VFTK(*)GAGSGELK(*)                   | K4  | 62.97 | 117.11 | -         | 1.067567 | 0.686046 | 0.876807    |
| Flnc   | Q8VHX6 | 2617 | LSGGHSLHETSTVLVETVK(*)SSSSR(         | K20 | 59.52 | 1000   | 1.0888888 | 0.986486 | 0.965116 | 1.0134972   |
| Flnc   | Q8VHX6 | 2023 | SGK(*)HVTNSPFK(*)                    | K3  | 51.46 | 131.34 | 0.9555555 | 1.027027 | 0.837209 | 0.9399306   |
| Flnc   | Q8VHX6 | 2617 | SLHETSTVLVETVK(*)SSSSR(*)            | K15 | 50.62 | 1000   | 0.9333333 | 0.378378 | 0.872093 | 0.7279349   |
| Flnc   | Q8VHX6 | 344  | TYAVSYVPK(*)VAGLHK(*)                | K9  | 47.41 | 30.1   | 0.8333333 | 1.783783 | 0.918604 | 1.1785739   |
| Flnc   | Q8VHX6 | 2044 | ILVGPSEIGDASK(*)VR(*)                | K13 | 44.28 | 1000   | 0.8555555 | -        | 1.034883 | 0.9452196   |
| Flnc   | Q8VHX6 | 1533 | IK(*)VLP SHDASK(*)                   | K2  | 23.58 | 113.83 | -         | -        | 4.197674 | 4.19        |
| Flnc   | Q8VHX6 | 2548 | SVTIDGPSK(*)VQLDC(+57.02)R(*)        | K9  | 19.36 | 1000   | -         | 1.459459 | -        | -           |
| Flnc   | Q8VHX6 | 2654 | VGQK(*)NSFTVDC(+57.02)SK(*)          | K4  | 18.97 | 124.12 | 1.6222222 | 1.175675 | 1.441860 | 1.4132528   |
| Cspg4  | Q8VHY0 | 1716 | NK(*)GLWVPEGQR(*)                    | K2  | 5.78  | 1000   | -         | -        | 1.366666 | 1.3666667   |
| Sfpq   | Q8VIJ6 | 324  | GK(*)GFGFIK(*)                       | K2  | 83.41 | 82.63  | 1.1195652 | 0.75     | 1.011627 | 0.9603977   |
| Sfpq   | Q8VIJ6 | 405  | STGK(*)GIVEFASK(*)                   | K4  | 80.34 | 188.52 | 1.0108695 | 0.657894 | 0.941860 | 0.8702083   |
| Sfpq   | Q8VIJ6 | 487  | WK(*)SLDEMEK(*)                      | K2  | 72.05 | 163.4  | 0.8152173 | 0.736842 | 1.034883 | 0.8623144   |
| Sfpq   | Q8VIJ6 | 510  | DK(*)LESEMEDAYHEHQANLLR(*)           | K2  | 51.97 | 1000   | -         | -        | 1.139534 | 1.139534884 |
| Sfpq   | Q8VIJ6 | 224  | PGGHPK(*)PPHR(*)                     | K6  | 51.33 | 1000   | -         | 1.039473 | 0.848837 | 0.9441554   |
| Sfpq   | Q8VIJ6 | 224  | PGGGPGMGAPGGHPK(*)PPHR(*)            | K15 | 24.92 | 1000   | -         | 4.289473 | 0.755813 | 2.5226438   |
| Ciapi1 | Q8WTY4 | 245  | AC(+57.02)K(*)NC(+57.02)TC(+57.02)K3 | K3  | 74.16 | 1000   | 0.9038461 | 0.942857 | 0.864583 | 0.9037622   |
| Acot7  | Q91V12 | 268  | HC(+57.02)K(*)TNIVTASVDAINFHDI       | K3  | 61.65 | 178.3  | -         | 0.818181 | 1.064516 | 0.941349    |
| Acot7  | Q91V12 | 158  | LTNK(*)ATLWYVPLSLK(*)                | K4  | 44.85 | 173.87 | 1.6354166 | -        | 0.967741 | 1.3015793   |
| Acot7  | Q91V12 | 173  | NVDK(*)VLEVPPIVYLR(*)                | K4  | 4.82  | 1000   | -         | -        | 1.870967 | 1.870967742 |
| Rab14  | Q91V41 | 24   | YIIIGDMGVGK(*)SC(+57.02)LLHQF        | K11 | 57.71 | 32.22  | 0.9473684 | -        | 0.988764 | 0.9680662   |
| Sfxn3  | Q91V61 | 169  | SLTK(*)HLPPLVGR(*)                   | K4  | 30.49 | 1000   | 1.0618556 | -        | 1.243589 | 1.1527227   |
| Acly   | Q91V92 | 968  | VK(*)SINNPDMR(*)                     | K2  | 95.5  | 1000   | 0.6702127 | 0.948717 | 0.685393 | 0.768108    |
| Acly   | Q91V92 | 272  | LTLNPK(*)GR(*)                       | K7  | 79.82 | 1000   | 0.7765957 | 0.705128 | 0.988764 | 0.823496    |
| Acly   | Q91V92 | 230  | V DATADYIC(+57.02)K(*)VK(*)          | K10 | 78.12 | 33.18  | 0.7659574 | 0.948717 | 0.887640 | 0.8674386   |
| Acly   | Q91V92 | 488  | HTK(*)AIVWGMQTR(*)                   | K3  | 68    | 1000   | 0.7340425 | 0.910256 | 1.011235 | 0.8851783   |
| Acly   | Q91V92 | 765  | SSEVQFGHAGAC(+57.02)ANQASET          | K23 | 58.62 | 56.99  | 0.9468085 | -        | 0.797752 | 0.8722807   |
| Acly   | Q91V92 | 1070 | LK(*)QGLYR(*)                        | K2  | 55.98 | 1000   | 1.1170212 | 0.910256 | 0.988764 | 1.0053472   |



|          |        |     |                                |     |       |        |           |          |          |           |
|----------|--------|-----|--------------------------------|-----|-------|--------|-----------|----------|----------|-----------|
| Acly     | Q91V92 | 958 | EGK(*)LIMGIGHR(*)              | K3  | 50.43 | 1000   | 0.5       | 0.705128 | 0.977528 | 0.7275521 |
| Acly     | Q91V92 | 478 | AK(*)PAMPQ GK(*)SATLFSR(*)     | K9  | 36.82 | 95.63  | 0.6702127 | 1.064102 | 0.752808 | 0.8290414 |
| Acly     | Q91V92 | 530 | QK(*)FYWGHK(*)                 | K2  | 25.44 | 47.92  | -         | -        | 1.887640 | 449       |
| Acly     | Q91V92 | 544 | EILIPVK(*)NMADAMK(*)           | K8  | 18.27 | 58.52  | -         | -        | 1.123595 | 506       |
| Poldip2  | Q91VA6 | 129 | GK(*)THTYYQVLIDAR(*)           | K2  | 49.68 | 1000   | 1.1686746 | 0.797468 | 0.905263 | 0.9571354 |
| Eif4a3   | Q91VC3 | 382 | GVAINFVK(*)NDDIR(*)            | K8  | 45.69 | 1000   | 0.6770833 | 0.571428 | 0.75     | 0.6661706 |
| Eif4a3   | Q91VC3 | 382 | K(*)GVAINFVK(*)NDDIR(*)        | K9  | 40.4  | 107.29 | 1.2083333 | 1.464285 | 0.967391 | 1.2133368 |
| Ghitm    | Q91VC9 | 77  | IFK(*)IDQMGR(*)                | K3  | 24.28 | 1000   | 1.7826086 | 1.352941 | 1.181818 | 1.4391227 |
| Snx9     | Q91VH2 | 288 | YK(*)HFDWLYER(*)               | K2  | 66.4  | 1000   | 1.0408163 | 0.925    | 0.989583 | 0.9851332 |
| Snx9     | Q91VH2 | 407 | FTK(*)AMDDGVK(*)               | K3  | 52.61 | 127.53 | 1.1530612 | -        | 1.447916 | 1.3004889 |
| Memo1    | Q91VH6 | 115 | IYGELWK(*)TGMFER(*)            | K7  | 60.31 | 1000   | -         | -        | 0.927835 | 052       |
| Cavin3   | Q91VJ2 | 121 | GK(*)LHVLLFK(*)                | K2  | 48.05 | 184.45 | 0.8686868 | 1        | 1.103448 | 0.9907117 |
| Bzw2     | Q91VK1 | 391 | GK(*)SVFLDQMK(*)               | K2  | 75.43 | 183.32 | 1.0113636 | 1.068493 | -        | 1.0399284 |
| Bzw2     | Q91VK1 | 320 | K(*)EELVAEQALK(*)HLK(*)        | K11 | 67.58 | 1000   | 0.9431818 | 1.013698 | 0.978494 | 0.9784584 |
| Bzw2     | Q91VK1 | 320 | EELVAEQALK(*)HLK(*)            | K10 | 63.69 | 1000   | 0.9431818 | 0.863013 | 0.870967 | 0.8923878 |
| Bzw2     | Q91VK1 | 192 | LFK(*)AWMAEK(*)                | K3  | 8.57  | 36.87  | -         | 1.150684 | 1.516129 | 1.333407  |
| Ppa2     | Q91VM9 | 48  | LFFK(*)HVAGHYISPFHDIPLK(*)     | K4  | 37.66 | 174.61 | 1.7304347 | -        | 1.023529 | 1.3769821 |
| Chchd6   | Q91VN4 | 203 | IQEK(*)NAELYK(*)               | K4  | 20.94 | 63.05  | -         | 0.666666 | -        |           |
| Atp5f1c  | Q91VR2 | 115 | QMK(*)NEVAALTAAGK(*)           | K3  | 89.6  | 207.94 | 0.7431192 | 0.802325 | 0.941176 | 0.8288738 |
| Atp5f1c  | Q91VR2 | 39  | SIK(*)NIQK(*)                  | K3  | 82.91 | 88.98  | 0.8256880 | 0.953488 | 0.921568 | 0.9002484 |
| Atp5f1c  | Q91VR2 | 138 | IK(*)GILYR(*)                  | K2  | 82.7  | 1000   | 0.9266055 | 0.860465 | 0.901960 | 0.8963438 |
| Atp5f1c  | Q91VR2 | 262 | MTAMDNASK(*)NASDMIDK(*)        | K9  | 52.56 | 154.54 | 0.6513761 | 0.872093 | 0.901960 | 0.8084767 |
| Ddx1     | Q91VR5 | 132 | GK(*)HYEYVSC(+57.02)HDQGLC(+5  | K2  | 88.05 | 1000   | 0.9479166 | 0.768292 | 1.076923 | 0.9310441 |
| Ddx1     | Q91VR5 | 268 | APDNYIVK(*)SQHTGNAQVSQTK(*)    | K8  | 78.22 | 37.79  | 1.0729166 | 0.670731 | 0.901098 | 0.8815824 |
| Ddx1     | Q91VR5 | 82  | TTIK(*)TGASVLNK(*)             | K4  | 58.41 | 75.74  | -         | -        | 0.934065 | 934       |
| Ddx1     | Q91VR5 | 625 | EK(*)VWYHVC(+57.02)SNR(*)      | K2  | 49    | 1000   | -         | -        | 0.692307 | 692       |
| Ddx1     | Q91VR5 | 516 | TK(*)IDC(+57.02)DNLEQYFMQGG    | K2  | 42.73 | 161.52 | 1.2916666 | -        | 1        | 1.1458333 |
| Ddx1     | Q91VR5 | 505 | EHK(*)MDQAIIFC(+57.02)R(*)     | K3  | 36.95 | 1000   | 1.2395833 | 0.780487 | 0.956043 | 0.9920384 |
| Ddx1     | Q91VR5 | 516 | TK(*)IDC(+57.02)DNLEQYFMQGG    | K2  | 32.46 | 161.52 | 1.625     | -        | 1.010989 | 1.3179945 |
| Ddx1     | Q91VR5 | 234 | NQALFPAC(+57.02)VLK(*)NAELK(*) | K11 | 21.36 | 38.19  | 0.65625   | 1.719512 | -        | 1.1878811 |
| Fam3c    | Q91VU0 | 67  | AC(+57.02)PEK(*)HFAFK(*)       | K5  | 75.18 | 100.21 | 1.0943396 | 0.653846 | 1.047619 | 0.9319349 |
| Fam3c    | Q91VU0 | 201 | SPFEQHIK(*)NNK(*)              | K8  | 28.45 | 37.54  | 0.2264150 | -        | -        |           |
| Sh3bgrl3 | Q91VW3 | 18  | EIK(*)SQQSEVTR(*)              | K3  | 34.1  | 1000   | 0.9636363 | -        | 0.905263 | 0.9344498 |
| Ubap2    | Q91VX2 | 48  | LAQVIFDK(*)NDSDFEAK(*)         | K8  | 9.82  | 52.42  | -         | -        | 2.871794 | 872       |



|         |        |     |                                  |     |       |        |           |          |                    |
|---------|--------|-----|----------------------------------|-----|-------|--------|-----------|----------|--------------------|
| Csde1   | Q91W50 | 166 | INFVIDNNK(*)HTGAVSAR(*)          | K9  | 83.83 | 1000   | 1.0526315 | 0.875    | 0.927835(0.9518222 |
| Csde1   | Q91W50 | 307 | SK(*)VTLLGDHVR(*)                | K2  | 68.37 | 1000   | 1.0526315 | 0.8625   | 0.865979(0.927037  |
| Csde1   | Q91W50 | 758 | LK(*)NITLDDASAPR(*)              | K2  | 43.92 | 1000   | 0.6526315 | 0.725    | 1.298969(0.8922002 |
| Csde1   | Q91W50 | 288 | IK(*)VDFVIPK(*)                  | K2  | 37.62 | 121.12 | -         | -        | 0.907216495        |
| Rbms1   | Q91W59 | 97  | AILDK(*)ATNK(*)                  | K5  | 61    | 88.98  | -         | 0.574712 | 1.476190(1.0254516 |
| Txndc5  | Q91W90 | 230 | IGK(*)VDC(+57.02)TQHYAVC(+57.0   | K3  | 86.3  | 1000   | 0.9255319 | 0.810126 | 1.077777(0.9378121 |
| Txndc5  | Q91W90 | 104 | VYVAK(*)VDC(+57.02)TADSDVC(+57.0 | K5  | 40.54 | 1000   | -         | 1.202531 | 1.122222(1.1623769 |
| Anapc4  | Q91W96 | 709 | TMHFEEK(*)HWR(*)                 | K6  | 62.85 | 1000   | 1.1153846 | -        | 1.269230(1.1923077 |
| Setd3   | Q91WC0 | 222 | YK(*)VIQTHPHANK(*)               | K2  | 10.06 | 133.99 | -         | -        | 1.844444444        |
| Polr3d  | Q91WD1 | 396 | LVC(+57.02)SPDFESLLDHK(*)HR(*)   | K14 | 25.37 | 1000   | -         | -        | -                  |
| Fam192a | Q91WE2 | 157 | LLAGAVK(*)HK(*)                  | K7  | 44.1  | 36.05  | 0.9038461 | 0.722891 | 0.826086(0.8176082 |
| Fam192a | Q91WE2 | 121 | SNLNK(*)VGISAENK(*)              | K5  | 13.62 | 99.23  | 1.5288461 | -        | 1.271739(1.4002926 |
| Fubp1   | Q91WJ8 | 239 | ITGDPYK(*)VQQAK(*)               | K7  | 81.07 | 87.95  | 0.8241758 | 0.947368 | 0.838709(0.8700846 |
| Fubp1   | Q91WJ8 | 308 | IQFK(*)PDDGTTTPDR(*)             | K4  | 42.66 | 1000   | 0.9010989 | 1.302631 | 1.010752(1.0714944 |
| Eif3h   | Q91WK2 | 227 | SAVADK(*)HELLSLASSNHLGK(*)       | K6  | 76.95 | 247.71 | 0.98      | 0.875    | 0.927083(0.9273611 |
| Eif3h   | Q91WK2 | 227 | K(*)SAVADK(*)HELLSLASSNHLGK(*)   | K7  | 9.71  | 41.57  | -         | -        | 1.489583333        |
| Yars    | Q91WQ3 | 380 | ILSVEK(*)HPDADSLYVEK(*)          | K6  | 72.55 | 50.04  | 0.8555555 | 0.863013 | -                  |
| Yars    | Q91WQ3 | 513 | QTNFMTK(*)LGFVSC(+57.02)K(*)     | K7  | 63.6  | 71.65  | -         | -        | 1.103448276        |
| Yars    | Q91WQ3 | 272 | HVLFPLK(*)SEFVILR(*)             | K7  | 51.3  | 1000   | 0.6888888 | -        | 0.942528(0.8157088 |
| Yars    | Q91WQ3 | 265 | IK(*)HVLFPLK(*)                  | K2  | 47.4  | 184.45 | 1.0222222 | 0.835616 | 1.091954(0.9832642 |
| Yars    | Q91WQ3 | 310 | DFAAEVVHPGDLK(*)NSVEVALNK(*)     | K13 | 40.57 | 76.18  | -         | -        | 0.747126437        |
| Yars    | Q91WQ3 | 356 | GPAK(*)NSEPEEVIPSR(*)            | K4  | 17.32 | 1000   | -         | 1.753424 | 0.919540(1.3364824 |
| Dap     | Q91XC8 | 12  | LETK(*)AGHPPAVK(*)               | K4  | 8.07  | 21.81  | 2.8076923 | -        | -                  |
| Vps36   | Q91XD6 | 218 | FK(*)SYLLSMGIANPVTR(*)           | K2  | 23.31 | 1000   | 1.0796460 | -        | 1.276315(1.1779809 |
| Osbpl1a | Q91XL9 | 315 | VPK(*)NSVQQR(*)                  | K3  | 67.88 | 1000   | 1.0985915 | -        | 0.989473(1.0440326 |
| Wrnip1  | Q91XU0 | 628 | DLGYGK(*)GYK(*)                  | K6  | 40.88 | 28.96  | 0.8383838 | -        | 0.75               |
| Wrnip1  | Q91XU0 | 296 | FVTLSATNAK(*)TNDVR(*)            | K10 | 21.71 | 1000   | 1.0101010 | 0.654545 | 0.452380(0.7056758 |
| Pip4k2c | Q91XU3 | 101 | FK(*)EYC(+57.02)PQVFR(*)         | K2  | 44    | 1000   | -         | -        | 0.956043956        |
| Pip4k2c | Q91XU3 | 83  | IK(*)VNNHFFHR(*)                 | K2  | 11.42 | 1000   | -         | -        | 1.703296703        |
| Mapk8   | Q91Y86 | 166 | SDC(+57.02)TLK(*)ILDFGLAR(*)     | K6  | 44.88 | 1000   | -         | -        | 2.342857143        |
| Ipo9    | Q91YE6 | 773 | LVSTLISK(*)AGR(*)                | K8  | 76.4  | 1000   | 0.8367346 | 0.662650 | 0.851063(0.783483  |
| Ipo9    | Q91YE6 | 277 | AVTALVK(*)NFPK(*)                | K7  | 75.44 | 77.13  | 1.0510204 | 1        | 0.946808(0.9992763 |
| Ipo9    | Q91YE6 | 884 | VK(*)GEEIYSMDEGIR(*)             | K2  | 48.1  | 1000   | 0.8979591 | 0.746987 | -                  |
| Ipo9    | Q91YE6 | 436 | HLQEAQTK(*)ASGTEHWWK(*)          | K9  | 43.58 | 85.33  | 1.2551020 | 0.506024 | -                  |

|        |        |     |                                 |     |       |        |           |          |                     |
|--------|--------|-----|---------------------------------|-----|-------|--------|-----------|----------|---------------------|
| Ipo9   | Q91YE6 | 458 | IHEAC(+57.02)MLALGSVK(*)SIITDSV | K13 | 20.38 | 115.01 | -         | -        | 1.021276596         |
| Ipo9   | Q91YE6 | 466 | SIITDSVK(*)NGR(*)               | K8  | 14.9  | 1000   | 0.6836734 | -        | -                   |
| Rbm5   | Q91YE7 | 314 | TIGVDFAK(*)SAR(*)               | K8  | 55.98 | 1000   | 0.9042553 | 1.050847 | 1.3235294 1.0928774 |
| Rbm5   | Q91YE7 | 787 | GAGLGAK(*)GSAYGLSGADSYK(*)      | K7  | 51.81 | 134.51 | -         | 0.847457 | -                   |
| Rbm5   | Q91YE7 | 169 | LVIQGK(*)HIAMHYSNPR(*)          | K6  | 9.19  | 1000   | -         | -        | 1.205882353         |
| AtI3   | Q91YH5 | 315 | EINGSK(*)VTC(+57.02)R(*)        | K6  | 9.99  | 1000   | -         | 1.108433 | 0.8021974 0.9553158 |
| Snx4   | Q91YJ2 | 361 | GMTTK(*)LFGQETPEQR(*)           | K5  | 22.11 | 1000   | -         | 0.902439 | 0.9230764 0.912758  |
| Uap1   | Q91YN5 | 152 | LQQLAEK(*)HHGNK(*)              | K7  | 52.64 | 32.16  | -         | 0.802631 | -                   |
| Uap1   | Q91YN5 | 180 | EFFTK(*)HK(*)                   | K5  | 9.25  | 25.66  | 1.1839080 | 0.973684 | 0.9176474 1.0250798 |
| Bag2   | Q91YN9 | 111 | NPQQEESLK(*)HATR(*)             | K9  | 53.21 | 1000   | 1.3541666 | -        | 1.0978264 1.2259964 |
| Bag2   | Q91YN9 | 200 | GAGSK(*)SLQNTDGK(*)             | K5  | 31.03 | 115.01 | 0.9270833 | -        | 1.2173914 1.0722373 |
| Nln    | Q91YP2 | 583 | QIVLSK(*)VDQSLHTNASLDAASEYAK    | K6  | 51.03 | 48.25  | -         | -        | 1.01010101          |
| Dera   | Q91YP3 | 218 | MAGSDFIK(*)TSTGK(*)             | K8  | 34.66 | 51     | -         | -        | 1.011494253         |
| Dera   | Q91YP3 | 137 | AAGC(+57.02)SIPVASVATGFPAGQT    | K23 | 3.51  | 1000   | -         | -        | 1.83908046          |
| Rpn1   | Q91YQ5 | 539 | LK(*)TEGSDLC(+57.02)DR(*)       | K2  | 98.04 | 1000   | 1.4081632 | 1        | 1.0425534 1.1502388 |
| Rpn1   | Q91YQ5 | 188 | NVESYTK(*)LGNPSR(*)             | K7  | 62.32 | 1000   | 0.8265306 | 0.686746 | 0.9468084 0.8200287 |
| Rpn1   | Q91YQ5 | 565 | ELVLK(*)SAVEAER(*)              | K5  | 57.83 | 1000   | 1.6224489 | 1.638554 | 1.8617024 1.7075684 |
| Rpn1   | Q91YQ5 | 170 | QFVVVFEGNHYFYSPYPTK(*)TQTMR(*)  | K18 | 15.7  | 1000   | -         | -        | 2                   |
| Twf1   | Q91YR1 | 171 | INEVQTDVSVDTK(*)HQTLLQGVAFPIS   | K13 | 57.24 | 1000   | 1.9375    | -        | 1.0219784 1.479739  |
| Prpf6  | Q91YR7 | 616 | AEVLWLMGAK(*)SK(*)              | K10 | 66.03 | 22.85  | 1.2988505 | 1.191780 | 1.6071424 1.3659248 |
| Prpf6  | Q91YR7 | 189 | LTPVPDSFFAK(*)HLQTGENHTSVDPF    | K11 | 55.24 | 1000   | 0.9195402 | 0.698630 | 0.9642854 0.8608187 |
| Prpf6  | Q91YR7 | 793 | AGLK(*)NIANTLMAK(*)             | K4  | 46.09 | 140.79 | 0.9655172 | 0.684931 | 1.2142854 0.9549115 |
| Prpf6  | Q91YR7 | 585 | AAYFEK(*)NHGTR(*)               | K6  | 24    | 1000   | 1.3333333 | 1.424657 | 1.2142854 1.3240922 |
| Ptgr1  | Q91YR9 | 5   | VQAK(*)SWTLK(*)                 | K4  | 66.61 | 73.54  | 0.7755102 | 0.896103 | 1.09375 0.921788    |
| Ptgr1  | Q91YR9 | 197 | TVK(*)SLEEALR(*)                | K3  | 50.28 | 1000   | 0.8367346 | 1.038961 | 0.7604164 0.8787041 |
| Ndufv1 | Q91YT0 | 375 | LIEFYK(*)HESC(+57.02)GQC(+57.02 | K6  | 43.81 | 1000   | 0.7920792 | 0.590361 | 1.1888884 0.8571098 |
| Ythdf2 | Q91YT7 | 416 | VFIK(*)SYSEDDIHR(*)             | K5  | 80.47 | 1000   | 1.0361445 | 0.876543 | 0.9462364 0.9529748 |
| Ythdf2 | Q91YT7 | 408 | DFDWNLK(*)HGR(*)                | K7  | 72.39 | 1000   | -         | -        | 0.892473118         |
| Ythdf2 | Q91YT7 | 548 | IIASYK(*)HTTSIFDDFSHYEK(*)      | K6  | 47.37 | 124.79 | 0.8433734 | 0.938271 | 1.0322584 0.9379677 |
| Dnajc3 | Q91YW3 | 39  | GVNADVEK(*)HLELGK(*)            | K8  | 69.95 | 129.19 | 0.9887640 | 0.7625   | 0.9042554 0.8851731 |
| Dnajc3 | Q91YW3 | 150 | EAESQLVK(*)ADEMQR(*)            | K8  | 7.44  | 1000   | -         | -        | 1.925531915         |
| Ptbp2  | Q91Z31 | 92  | VTNILMLK(*)GK(*)                | K8  | 56.64 | 1000   | 1.1147540 | 0.873417 | 0.4285714 0.8055811 |
| Ptbp2  | Q91Z31 | 137 | ELK(*)TDNTLNQR(*)               | K3  | 17.72 | 1000   | -         | 1.772151 | -                   |
| Ptbp2  | Q91Z31 | 411 | VTLSK(*)HQTQQLPR(*)             | K5  | 9.16  | 1000   | 2.7540983 | -        | -                   |

|          |        |      |                                |     |       |        |           |          |                    |
|----------|--------|------|--------------------------------|-----|-------|--------|-----------|----------|--------------------|
| Grhpr    | Q91Z53 | 235  | MK(*)NTAIFINISR(*)             | K2  | 10.71 | 1000   | -         | -        | 1.042553191        |
| Srgap2   | Q91Z67 | 470  | LQAK(*)HDLLQK(*)               | K4  | 60.19 | 129.72 | -         | 0.680412 | -                  |
| Ugp2     | Q91ZJ5 | 127  | GPK(*)SLIGVR(*)                | K3  | 73.71 | 1000   | 0.8723404 | 0.786666 | 0.988235;0.8824141 |
| Ugp2     | Q91ZJ5 | 319  | AHVDEFK(*)SVSK(*)              | K7  | 57.5  | 28.7   | -         | -        | 1.588235294        |
| Ugp2     | Q91ZJ5 | 438  | LGSSFTK(*)VQDYLR(*)            | K7  | 50.29 | 1000   | -         | -        | 1.564705882        |
| Ugp2     | Q91ZJ5 | 438  | TK(*)VQDYLR(*)                 | K2  | 27.76 | 1000   | 1.6702127 | -        | 1.670588;1.6704005 |
| Snx18    | Q91ZR2 | 304  | YK(*)HFDWLYAR(*)               | K2  | 5.04  | 1000   | -         | -        | 1.517241379        |
| Dst      | Q91ZU6 | 6136 | QFK(*)SEAYQQIEMER(*)           | K3  | 42.52 | 1000   | 1.0404040 | 1.038461 | 0.752577;0.9438143 |
| Dst      | Q91ZU6 | 3903 | SFSEDVISHK(*)GDLR(*)           | K10 | 35.99 | 1000   | -         | -        | 0.804123711        |
| Dst      | Q91ZU6 | 6479 | EQIIELDK(*)TGTHLK(*)           | K8  | 32.09 | 49.74  | 0.8787878 | 1.051282 | 1.020618;0.9835628 |
| Mia2     | Q91ZV0 | 685  | LLDK(*)VSIVQK(*)               | K4  | 4.96  | 41.24  | -         | -        | 1.190082645        |
| Smarca5  | Q91ZW3 | 989  | FDWFLK(*)SR(*)                 | K6  | 52.98 | 1000   | 0.8453608 | -        | 1.011764;0.9285628 |
| Smarca5  | Q91ZW3 | 923  | ALDTK(*)IGR(*)                 | K5  | 27.39 | 1000   | 0.9690721 | -        | 1.305882;1.1374773 |
| Smarca5  | Q91ZW3 | 798  | TIGYK(*)VPR(*)                 | K5  | 21.73 | 1000   | -         | -        | 0.8                |
| Smarca5  | Q91ZW3 | 928  | YK(*)APFHQLR(*)                | K2  | 20.29 | 1000   | 1.3298969 | 0.923076 | 0.917647(1.0568736 |
| Lrp1     | Q91ZX7 | 2211 | TILK(*)SIHLSDER(*)             | K4  | 65.72 | 1000   | 0.8118811 | 0.772151 | 0.842105;0.8087128 |
| Lrp1     | Q91ZX7 | 1695 | LDGSFK(*)NAVVGLEQPHGLVWHPL     | K6  | 37.96 | 1000   | -         | -        | 1.442105263        |
| Lrp1     | Q91ZX7 | 1815 | MGTC(+57.02)NK(*)ADGSGSVVLR(*) | K6  | 21.4  | 1000   | 1.8910891 | -        | 1.557894;1.7244919 |
| Lrp1     | Q91ZX7 | 348  | VFFTDYGQIPK(*)VER(*)           | K11 | 17.54 | 1000   | 0.8118811 | -        | 1.105263;0.9585722 |
| Scpep1   | Q920A5 | 407  | ALYTDPK(*)SSETAAFK(*)          | K7  | 63.2  | 114.67 | 1.3298969 | 0.8125   | 0.952941;1.0317794 |
| Scpep1   | Q920A5 | 255  | EATQLWGK(*)AEMIIEK(*)          | K8  | 42.19 | 63.15  | -         | -        | 0.882352941        |
| Supt16h  | Q920B9 | 280  | FK(*)SYC(+57.02)SNLVR(*)       | K2  | 86.16 | 1000   | 1.03125   | 0.911392 | 0.989795;0.9774794 |
| Supt16h  | Q920B9 | 426  | VK(*)NVGIFLK(*)                | K2  | 67.73 | 170.44 | 0.8645833 | 0.962025 | 1.336734(1.0544478 |
| Supt16h  | Q920B9 | 781  | TAFK(*)NFIEK(*)                | K4  | 63.97 | 112.16 | 0.8125    | 1.164556 | 1.091836;1.0229646 |
| Supt16h  | Q920B9 | 904  | YTEGVQSLNWTN(*)IMK(*)          | K12 | 62.67 | 26.52  | 0.7708333 | -        | -                  |
| Supt16h  | Q920B9 | 366  | EGSLVINSK(*)NQYK(*)            | K9  | 60.72 | 55.36  | 0.8541666 | 1.012658 | 0.938775;0.9352001 |
| Supt16h  | Q920B9 | 696  | GDK(*)VDILYNNIK(*)             | K3  | 45.63 | 181.94 | 0.5208333 | 1.088607 | 0.755102(0.788181  |
| Med28    | Q920D3 | 131  | DALVQK(*)HLTK(*)               | K6  | 44.4  | 82.24  | -         | -        | 0.894117647        |
| Fdps     | Q920E5 | 57   | EVLEYNALGGK(*)YNR(*)           | K11 | 47.18 | 1000   | 1.0212765 | 0.924050 | 0.533333;0.8262202 |
| Msi2     | Q920Q6 | 145  | VEDAMLMFDK(*)TTNR(*)           | K10 | 8.41  | 1000   | 1.7560975 | -        | -                  |
| Ivns1abp | Q920Q8 | 480  | GLK(*)NC(+57.02)DVFDPVTK(*)    | K3  | 13.04 | 91.6   | -         | 1.114035 | -                  |
| Bicd2    | Q921C5 | 635  | DQIK(*)HLQAAVDR(*)             | K4  | 28.97 | 1000   | 0.8524590 | 1.052631 | 0.558823;0.8213047 |
| Bicd2    | Q921C5 | 351  | LK(*)QQLVQMER(*)               | K2  | 19.6  | 1000   | 0.9754098 | 0.614035 | 0.794117(0.7945209 |
| Med6     | Q921D4 | 241  | NIQQTVSTK(*)GPPEK(*)R(*)       | K14 | 70.43 | 1000   | -         | 0.504424 | 0.659793;0.5821093 |

|         |        |     |                                 |     |       |        |           |          |             |           |
|---------|--------|-----|---------------------------------|-----|-------|--------|-----------|----------|-------------|-----------|
| Med6    | Q921D4 | 236 | NIQQTVSTK(*)GPPEK(*)R(*)        | K9  | 70.43 | 1000   | -         | 0.504424 | 0.659793    | 0.5821093 |
| Med6    | Q921D4 | 227 | ESTK(*)NIQQTVSTK(*)             | K4  | 69.24 | 159.26 | -         | 0.663716 | 0.907216    | 0.7854667 |
| Tardbp  | Q921F2 | 263 | GISVHISNAEPK(*)HNSNR(*)         | K12 | 76.68 | 1000   | 1.2       | 0.864864 | 1.011494    | 1.025453  |
| Tardbp  | Q921F2 | 160 | FTEYETQVK(*)VMSQR(*)            | K9  | 72.37 | 1000   | -         | -        | 1.724137931 |           |
| Tardbp  | Q921F2 | 102 | AVQK(*)TSDLIVLGLPWK(*)          | K4  | 54.23 | 250.87 | 1.1684210 | -        | 1.022988    | 1.0957048 |
| Tardbp  | Q921F2 | 145 | SK(*)GFGFVR(*)                  | K2  | 52.19 | 1000   | 1.2842105 | -        | -           |           |
| Tardbp  | Q921F2 | 145 | TGHSK(*)GFGFVR(*)               | K5  | 51.19 | 1000   | 1.0210526 | 1.121621 | 0.770114    | 0.9709297 |
| HnrnpII | Q921F4 | 544 | ASAK(*)TLSGLLEWK(*)             | K4  | 34.71 | 181.07 | 0.66      | 1.207792 | -           | 0.9338961 |
| HnrnpII | Q921F4 | 555 | C(+57.02)K(*)TDAVEALTALNHYQIR(  | K2  | 20.09 | 1000   | -         | -        | 1.260416667 |           |
| Etfdh   | Q921G7 | 343 | WK(*)HHPSIQPTLEGGK(*)           | K2  | 39.97 | 55     | 1.0219780 | 0.643835 | -           | 0.8329068 |
| Etfdh   | Q921G7 | 152 | FAILTEK(*)HR(*)                 | K7  | 34.29 | 1000   | 1.0879120 | 0.904109 | 0.690476    | 0.894166  |
| Sh3bp4  | Q921I6 | 481 | VTVGLYGPK(*)HIHPSFK(*)          | K9  | 27.64 | 29.06  | 0.5096525 | 0.646551 | 0.65        | 0.6020681 |
| Cog2    | Q921L5 | 57  | LLK(*)TAMVELINK(*)              | K3  | 56.07 | 199.32 | 1.2698412 | -        | 1.154929    | 1.2123854 |
| Sf3b3   | Q921M3 | 294 | GMIFVC(+57.02)SATHK(*)TK(*)     | K11 | 65.97 | 24.24  | 0.8229166 | 0.734939 | 1.088888    | 0.8822484 |
| Sf3b3   | Q921M3 | 109 | IHQETFGK(*)SGC(+57.02)R(*)      | K8  | 65.52 | 1000   | 0.7916666 | 0.795180 | 0.966666    | 0.8511714 |
| Sf3b3   | Q921M3 | 26  | AIHGNFSGTK(*)QQEIVVSR(*)        | K10 | 59.87 | 1000   | 0.8854166 | 0.867469 | 1.066666    | 0.9398511 |
| Sf3b3   | Q921M3 | 984 | C(+57.02)ENK(*)HIANYISGIQTIGHR  | K4  | 45.19 | 1000   | 0.9270833 | 0.590361 | 1.033333    | 0.8502594 |
| Fam49b  | Q921M7 | 308 | YTTK(*)HLNDETTSK(*)             | K4  | 24.05 | 178.24 | 1.2636363 | 1.256097 | 1.089887    | 1.2032072 |
| Ddx27   | Q921N6 | 511 | TVINFTMPNTVK(*)HYVHR(*)         | K12 | 18.91 | 1000   | -         | -        | 1.303370787 |           |
| Mrpl37  | Q921S7 | 125 | QALWLTk(*)TK(*)                 | K7  | 28.66 | 20.41  | -         | -        | 1.125       |           |
| Mrpl37  | Q921S7 | 194 | SQILK(*)HPSLAR(*)               | K5  | 9.97  | 1000   | -         | -        | 1.3125      |           |
| Pdia5   | Q921X9 | 458 | DK(*)NQDLC(+57.02)QQEAVK(*)     | K2  | 38.8  | 223.6  | -         | 0.926470 | 2.439560    | 1.6830155 |
| Mob1a   | Q921Y0 | 149 | NFMSVAK(*)TILK(*)               | K7  | 63.09 | 48.12  | -         | -        | 0.454022989 |           |
| Dars    | Q922B2 | 74  | GK(*)QC(+57.02)FLVLR(*)         | K2  | 82.68 | 1000   | 0.8571428 | 0.768292 | 1.043956    | 0.8897972 |
| Dars    | Q922B2 | 453 | IK(*)JAYIDSFR(*)                | K2  | 54.65 | 1000   | 1.0306122 | 0.939024 | 1.186813    | 1.0521499 |
| Dars    | Q922B2 | 241 | FK(*)NNAYLAQSPQLYK(*)           | K2  | 36.57 | 189.17 | 0.7857142 | -        | 1.175824    | 0.9807692 |
| Ppp6r3  | Q922D4 | 787 | TETAVFK(*)SEEEK(*)              | K7  | 38.33 | 48.54  | 0.8611111 | 0.922077 | 0.736842    | 0.8400104 |
| Mthfd1  | Q922D8 | 175 | SK(*)IVGAPMHDLLLWNNATVTTC(+     | K2  | 52.65 | 199.48 | 0.9340659 | -        | 0.977528    | 0.955797  |
| Mthfd1  | Q922D8 | 866 | QGFGNLPIC(+57.02)MAK(*)THLSLS   | K12 | 43.62 | 29.09  | -         | -        | 0.865168539 |           |
| Mthfd1  | Q922D8 | 21  | LK(*)NQVTR(*)                   | K2  | 36.32 | 1000   | 1.3296703 | -        | 1.247191    | 1.2884307 |
| Mthfd1  | Q922D8 | 866 | AK(*)THLSLSHNPEQK(*)            | K2  | 15.9  | 109.74 | -         | -        | 1.292134831 |           |
| Pcyt2   | Q922E4 | 158 | MLLVTK(*)AHSSQEMSSEYR(*)        | K6  | 56.38 | 1000   | -         | -        | 0.557894737 |           |
| Pcyt2   | Q922E4 | 327 | VDLVC(+57.02)HGK(*)TEIVPDR(*)   | K8  | 29.67 | 1000   | 0.4819277 | 1.411764 | 0.905263    | 0.9329852 |
| Fastkd2 | Q922E6 | 624 | VAVLC(+57.02)VPK(*)SVYC(+57.02) | K8  | 4.49  | 1000   | -         | -        | 1.453781513 |           |

|         |        |     |                                |     |       |        |           |          |             |             |
|---------|--------|-----|--------------------------------|-----|-------|--------|-----------|----------|-------------|-------------|
| Fam76a  | Q922G2 | 281 | EVTEQLQAK(*)NR(*)              | K9  | 12.24 | 1000   | -         | 0.932692 | 0.610738    | 0.7717153   |
| Pdk3    | Q922H2 | 374 | LPVFNK(*)SAWR(*)               | K6  | 40.69 | 1000   | 0.9626168 | 0.857142 | 0.6666666   | 0.8288088   |
| Pdk3    | Q922H2 | 43  | DNAC(+57.02)EK(*)TSYMFLR(*)    | K6  | 28.55 | 1000   | -         | -        | 0.189189189 |             |
| Clip1   | Q922J3 | 992 | TK(*)HEEILQNLQK(*)             | K2  | 39.24 | 228.69 | -         | 1.083333 | 0.923076    | 1.0032051   |
| Clip1   | Q922J3 | 613 | LK(*)TQIER(*)                  | K2  | 27.34 | 1000   | 1.1980198 | -        | 0.912087    | 1.0550539   |
| Nop2    | Q922K7 | 408 | LK(*)SVVGNLHR(*)               | K2  | 54.09 | 1000   | 0.8653846 | 0.817073 | 0.956521    | 0.8796598   |
| 2-Mar   | Q922Q1 | 66  | VWIYPIK(*)SC(+57.02)K(*)       | K7  | 40.39 | 40.63  | 0.8928571 | 0.811594 | 0.742268    | 0.8155731   |
| Riok1   | Q922Q2 | 210 | IYK(*)TSILMFK(*)               | K3  | 8.18  | 118.11 | 0.5263157 | 0.567164 | 0.753246    | 0.6155756   |
| Lrrc59  | Q922Q8 | 73  | NK(*)LQQLPADFGR(*)             | K2  | 77.97 | 1000   | 0.7156862 | 0.740740 | 0.988636    | 0.8150211   |
| Lrrc59  | Q922Q8 | 143 | QC(+57.02)ANK(*)VLQHMK(*)      | K5  | 60.74 | 87.26  | 0.7450980 | 0.839506 | 1           | 0.8615347   |
| Ppp4r3b | Q922R5 | 777 | SVVSQTPASSNVASSK(*)TTSLATSVT   | K17 | 2.9   | 64.8   | 0.0344827 | 0.253623 | -           | 0.144053    |
| Pdia6   | Q922R8 | 85  | VGAVNADK(*)HQSLGGQYGVQGFP      | K8  | 91.67 | 198.31 | 1.0510204 | 0.8125   | 0.822222    | 0.8952475   |
| Pdia6   | Q922R8 | 245 | IFQK(*)GESPDYDGGGR(*)          | K4  | 70.28 | 1000   | 0.9897959 | 0.8625   | 1.244444    | 1.0322468   |
| Pdia6   | Q922R8 | 368 | MK(*)FALLK(*)                  | K2  | 64.65 | 111.23 | -         | -        | 0.9         |             |
| Pdia6   | Q922R8 | 241 | GFPTIK(*)IFQK(*)               | K6  | 33.3  | 55.36  | 0.7551020 | 0.8625   | 0.788888    | 0.8021636   |
| Pdia6   | Q922R8 | 235 | YGIK(*)GFPTIK(*)               | K4  | 10.66 | 58.16  | -         | -        | 1.433333    | 1.4333333   |
| Prpf3   | Q922U1 | 495 | VLGTEAVQDPTK(*)VEAHVR(*)       | K12 | 50.23 | 1000   | 0.9896907 | 0.769230 | 1.382022    | 1.0469813   |
| Plrg1   | Q922V4 | 362 | LWDLVAGK(*)TR(*)               | K8  | 34.6  | 1000   | -         | 9.155844 | 1.590361    | 5.3731028   |
| Plrg1   | Q922V4 | 7   | M(+42.01)VEEVQK(*)HSVHTLVFR(*) | K7  | 29.64 | 1000   | 1.3571428 | -        | 0.783132    | 1.0701377   |
| Plrg1   | Q922V4 | 319 | TK(*)ASVHTLSGHTNAVATVR(*)      | K2  | 27.8  | 1000   | -         | 1.792207 | 1.289156    | 1.5406822   |
| Prmt7   | Q922X9 | 121 | VINK(*)HSTEVTGPDGDLPC(+57.02)  | K4  | 35.98 | 1000   | 0.9387755 | 0.137931 | 0.718446    | 0.5983844   |
| Dbr1    | Q923B1 | 128 | IGGISGIFK(*)SHDYR(*)           | K9  | 57.73 | 1000   | 0.8224299 | 0.930555 | 0.817307    | 0.8567644   |
| Blvrb   | Q923D2 | 178 | VISK(*)HDLGHFMLR(*)            | K4  | 69.36 | 1000   | 0.5833333 | 0.743589 | 1.578947    | 0.9686235   |
| Wbp11   | Q923D5 | 316 | FADMPGK(*)SR(*)                | K7  | 72.11 | 1000   | 0.9636363 | 0.63     | 0.902173    | 0.8319368   |
| Wbp11   | Q923D5 | 545 | PK(*)ADDASAATIEK(*)            | K2  | 48.33 | 122.98 | -         | -        | 1.304347    | 1.304347826 |
| Wbp11   | Q923D5 | 13  | STSSTK(*)SGK(*)FMNPTDQAR(*)    | K9  | 20.58 | 1000   | -         | 0.74     | -           |             |
| Wbp11   | Q923D5 | 10  | STSSTK(*)SGK(*)FMNPTDQAR(*)    | K6  | 20.58 | 1000   | -         | 0.74     | -           |             |
| Wbp11   | Q923D5 | 13  | SGK(*)FMNPTDQAR(*)             | K3  | 15.57 | 1000   | -         | 0.47     | 0.945652    | 0.7078261   |
| Rab30   | Q923S9 | 22  | IVLIGNAGVGK(*)TC(+57.02)LVR(*) | K11 | 37.16 | 1000   | 0.9166666 | -        | 2.1875      | 1.5520833   |
| Camk2g  | Q923T9 | 268 | ITADQALK(*)HPWVC(+57.02)QR(*)  | K8  | 58.54 | 1000   | 0.8636363 | 0.721518 | 1.133333    | 0.9061629   |
| Xpo5    | Q924C1 | 413 | MGFPSK(*)TDSPSC(+57.02)EYSR(*) | K6  | 35.1  | 1000   | 0.8421052 | -        | -           |             |
| Xpo5    | Q924C1 | 57  | LAEK(*)TQIAIVR(*)              | K4  | 30.64 | 1000   | 0.6105263 | 0.891566 | 0.944444    | 0.8155123   |
| Wac     | Q924H7 | 302 | LPTPTASLPAQK(*)TER(*)          | K12 | 35.81 | 1000   | -         | 0.591836 | -           |             |
| Mta3    | Q924K8 | 287 | YGK(*)DFNDIR(*)                | K3  | 42.59 | 1000   | -         | -        | 1.300970    | 1.300970874 |



|         |        |      |                                  |     |       |        |           |          |             |
|---------|--------|------|----------------------------------|-----|-------|--------|-----------|----------|-------------|
| Mta3    | Q924K8 | 474  | TTYFTK(*)IAR(*)                  | K6  | 9.85  | 1000   | -         | -        | 1.184466019 |
| Smc6    | Q924W5 | 356  | APEC(+57.02)MALK(*)TDVIAR(*)     | K8  | 25.66 | 1000   | -         | 0.430769 | -           |
| Smc6    | Q924W5 | 934  | YK(*)TYQQFR(*)                   | K2  | 23.15 | 1000   | -         | -        | 1.765957447 |
| Pawr    | Q925B0 | 220  | YK(*)STTSAPEDIENR(*)             | K2  | 18.79 | 1000   | 1.8541666 | -        | -           |
| Atad3   | Q925I1 | 182  | HK(*)NEMLR(*)                    | K2  | 51.27 | 1000   | 1.2470588 | -        | 0.8350511   |
| Med1    | Q925J9 | 1154 | NSSQTGGK(*)PGSSPITK(*)           | K8  | 50.28 | 99.23  | 0.9       | 1.050847 | 0.921348    |
| Med1    | Q925J9 | 1076 | GTVMVGK(*)PSSHSQYTSSGSVSSSG      | K7  | 45.89 | 119.08 | 1.225     | 1.254237 | 1.752808    |
| Taldo1  | Q93092 | 219  | SVTK(*)IYNYK(*)                  | K4  | 90.19 | 121.92 | 1.0543478 | 1.013513 | 1.095238    |
| Taldo1  | Q93092 | 230  | FGYK(*)TIVMGASFR(*)              | K4  | 47.26 | 1000   | -         | 0.905405 | 0.976190    |
| Taldo1  | Q93092 | 81   | LGGPQEEQIK(*)NAIDK(*)            | K10 | 42.11 | 46.62  | 1.7608695 | 1.270270 | 1.035714    |
| Taldo1  | Q93092 | 215  | SYEPQEDPGVK(*)SVTK(*)            | K11 | 28.84 | 34.3   | 0.5108695 | -        | 1.059523    |
| Hnrnpab | Q99020 | 271  | GSGGGQGSTNYGK(*)SQR(*)           | K13 | 90.17 | 1000   | 1.1836734 | 1.0125   | 1.066666    |
| Myo5a   | Q99104 | 551  | AFIHK(*)HFADK(*)                 | K5  | 34.02 | 61.26  | -         | 0.884615 | 0.886597    |
| Myo5a   | Q99104 | 405  | DALAK(*)HIYAK(*)                 | K5  | 20.44 | 95.62  | -         | 2.051282 | -           |
| Myo5a   | Q99104 | 1487 | LVK(*)NLILELK(*)PR(*)            | K3  | 17.04 | 125.04 | 0.9550561 | -        | -           |
| Myo5a   | Q99104 | 556  | HFADK(*)VEYQC(+57.02)EGFLEK(*)   | K5  | 9.52  | 99.02  | 2.3707865 | -        | -           |
| Wdr77   | Q99J09 | 121  | FC(+57.02)K(*)YEHDDIVSTVTVLSSG   | K3  | 43.77 | 196.93 | -         | -        | 0.99        |
| Thumpd1 | Q99J36 | 19   | GK(*)SQFLPAK(*)                  | K2  | 93.82 | 186.64 | 1.1298701 | 0.746268 | 0.923076    |
| Thumpd1 | Q99J36 | 201  | GTFQIVYK(*)SR(*)                 | K8  | 50.66 | 1000   | 1.7142857 | -        | 1.371794    |
| Nrbp1   | Q99J45 | 231  | IGSVAPDTINNHHVK(*)TC(+57.02)R(*) | K14 | 26.17 | 1000   | -         | -        | 0.897727273 |
| Rfc4    | Q99J62 | 124  | VK(*)NFAQLTVSGSR(*)              | K2  | 53.99 | 1000   | 0.9651162 | 0.739726 | 0.804347    |
| Nans    | Q99J77 | 243  | HITLDK(*)TWK(*)                  | K6  | 76.69 | 62.26  | 0.9782608 | 0.729411 | 0.921348    |
| Nans    | Q99J77 | 55   | FQK(*)SELEFK(*)                  | K3  | 66.06 | 112.31 | -         | 0.764705 | 1.044943    |
| Nans    | Q99J77 | 16   | WVGKG(*)HPC(+57.02)FIIAEIGQNH    | K5  | 47.58 | 67.42  | -         | -        | 0.91011236  |
| Cdk9    | Q99J95 | 178  | AFSLAK(*)NSQPNR(*)               | K6  | 37.69 | 1000   | 1.3333333 | -        | 1.405797    |
| Psip1   | Q99JF8 | 405  | FK(*)VSQVIMEK(*)                 | K2  | 63.45 | 161.78 | 0.8936170 | 0.905405 | 1.035714    |
| Psip1   | Q99JF8 | 413  | VSQVIMEK(*)STMLYNK(*)            | K8  | 63.2  | 110.43 | 1.3936170 | 1.054054 | -           |
| Psip1   | Q99JF8 | 16   | MK(*)GYPHWPAR(*)                 | K2  | 63.02 | 1000   | 1.0319148 | 1.040540 | 1.035714    |
| Psip1   | Q99JF8 | 358  | IHAIEK(*)NSLK(*)                 | K6  | 61.47 | 88.98  | 1.3510638 | 1.378378 | 1.226190    |
| Kdelr1  | Q99JH8 | 83   | FK(*)ATYDGNHDTFR(*)              | K2  | 10.4  | 1000   | -         | -        | 0.842975207 |
| Psm6    | Q99JI4 | 130  | TYDK(*)TVALGHR(*)                | K4  | 83.74 | 1000   | -         | 0.776315 | 0.978260    |
| Psm6    | Q99JI4 | 349  | IDK(*)VNEIVETNR(*)PDSK(*)        | K3  | 80.83 | 152.87 | 0.7741935 | 0.736842 | 0.902173    |
| Psm6    | Q99JI4 | 165  | AK(*)SLIEEGGDWDR(*)              | K2  | 54.42 | 1000   | 1.3010752 | 2.447368 | 1.260869    |
| Psm6    | Q99JI4 | 362  | VNEIVETNR(*)PDSK(*)NWQYQETIK     | K13 | 23.07 | 46.57  | 1.9892473 | -        | 0.967391    |



|         |        |     |                               |     |       |        |           |          |                    |
|---------|--------|-----|-------------------------------|-----|-------|--------|-----------|----------|--------------------|
| Psm6    | Q99JI4 | 181 | LK(*)VYQGLYC(+57.02)VAIR(*)   | K2  | 18.51 | 1000   | -         | -        | 1.076086957        |
| Rap1b   | Q99JI6 | 128 | VVGK(*)EQGQNLAR(*)            | K4  | 6     | 1000   | -         | -        | 1.741573034        |
| Cdc26   | Q99JP4 | 68  | IGYK(*)PQLK(*)                | K4  | 12.74 | 41.04  | -         | 1.132653 | 0.924050(1.0283518 |
| Lims1   | Q99JW4 | 210 | VVNAMGK(*)QWHVEHFVC(+57.02)   | K7  | 64.94 | 71.53  | 0.7684210 | 0.917808 | 1.011235(0.8991551 |
| Eif3m   | Q99JX4 | 324 | MVYC(+57.02)K(*)IDQTQR(*)     | K5  | 75.86 | 1000   | 0.7666666 | -        | 1.010869(0.8887681 |
| Nxf1    | Q99JX7 | 383 | GSYFGTENLK(*)SLVLR(*)         | K10 | 40.1  | 1000   | 0.6875    | -        | -                  |
| Nxf1    | Q99JX7 | 303 | TLNLSGNELK(*)TER(*)           | K10 | 24.9  | 1000   | -         | 1.356321 | 0.906976(1.1316493 |
| Nxf1    | Q99JX7 | 6   | A(+42.01)DEGK(*)SYNEHDDR(*)   | K5  | 16.53 | 1000   | -         | 0.609195 | -                  |
| Hadhb   | Q99JY0 | 53  | MK(*)NIVVVEGVR(*)             | K2  | 44.27 | 1000   | 0.8454545 | -        | 0.860215(0.8528348 |
| Plpp3   | Q99JY8 | 282 | TK(*)TSLSLPAPAIR(*)           | K2  | 14.71 | 1000   | -         | 2.1      | 0.794392(1.4471963 |
| Actr3   | Q99JY9 | 317 | R(*)PLYK(*)NIVLSGGSTMFR(*)    | K5  | 67.58 | 1000   | 0.8019801 | 0.974683 | 0.944444(0.9070361 |
| Arfgap2 | Q99K28 | 7   | A(+42.01)ASPSK(*)TEIQTIFK(*)  | K6  | 25.3  | 82.59  | 1.0442477 | -        | 0.766355(0.9053015 |
| Nono    | Q99K48 | 200 | GIVEFSGK(*)PAAR(*)            | K8  | 93.72 | 1000   | 0.9010989 | 0.92     | 0.898876(0.9066584 |
| Nono    | Q99K48 | 245 | LVIK(*)NQQFHK(*)              | K4  | 84.88 | 151.86 | 1.0989010 | 1.026666 | 0.955056(1.0268746 |
| Nono    | Q99K48 | 192 | GR(*)PSGK(*)GIVEFSGK(*)       | K6  | 83.48 | 131.72 | 1.0109890 | 0.426666 | 0.471910(0.6365219 |
| Nono    | Q99K48 | 111 | DK(*)GFGFIR(*)                | K2  | 79.82 | 1000   | 1.0989010 | 0.92     | 1                  |
| Nono    | Q99K48 | 101 | YGK(*)AGEVFIHK(*)             | K3  | 69.38 | 242.89 | 1.0219780 | 1.053333 | 0.955056(1.0101225 |
| Nono    | Q99K48 | 128 | TLAEIAK(*)VELDNMPLR(*)        | K7  | 61.67 | 1000   | -         | -        | 1.101123596        |
| Nono    | Q99K48 | 5   | M(+42.01)QSNK(*)AFNLEK(*)     | K5  | 53.03 | 87.26  | 1.0329670 | 0.68     | 0.696629(0.8031987 |
| Nono    | Q99K48 | 373 | QQEGFK(*)GTFPDAR(*)           | K6  | 52.29 | 1000   | -         | -        | 1.269662921        |
| Pls3    | Q99K51 | 537 | TLSEAGK(*)STSIQSFK(*)         | K7  | 72.93 | 131.72 | 0.9468085 | 0.611111 | 1.2                |
| Pls3    | Q99K51 | 52  | EANMPLPGYK(*)VR(*)            | K10 | 69.37 | 1000   | -         | 0.666666 | 0.894117(0.7803922 |
| Pls3    | Q99K51 | 91  | SSDIK(*)TFR(*)                | K6  | 39.66 | 1000   | -         | -        | 1.988235294        |
| Pls3    | Q99K51 | 437 | IK(*)VPVDWSK(*)               | K2  | 38.16 | 79.54  | 0.7446808 | -        | -                  |
| Pls3    | Q99K51 | 85  | VYIFQEVK(*)SSDIK(*)           | K8  | 11.18 | 30.1   | -         | -        | 0.729411765        |
| Pls3    | Q99K51 | 300 | DSK(*)AYFHLLNQIAPK(*)         | K3  | 3.72  | 40.43  | -         | -        | 1.741176471        |
| Psat1   | Q99K85 | 5   | M(+42.01)EATK(*)QVNFPGGPAK(*) | K5  | 83.61 | 128.75 | 1.0212765 | 0.896103 | 1.033707(0.9836961 |
| Psat1   | Q99K85 | 333 | AVELNMISLK(*)GHR(*)           | K10 | 71.64 | 1000   | 1.2765957 | 1.194805 | 1.202247(1.2245494 |
| Psat1   | Q99K85 | 323 | FLDK(*)AVELNMISLK(*)          | K4  | 58.66 | 207.31 | -         | -        | 0.831460674        |
| Psat1   | Q99K85 | 200 | AGAQQ(*)NVGSAGVTVVIVR(*)      | K5  | 46.74 | 1000   | 1.2872340 | -        | 1.089887(1.1885608 |
| Psat1   | Q99K85 | 333 | MISLK(*)GHR(*)                | K5  | 35.66 | 1000   | 1.3297872 | -        | 1.191011(1.2603992 |
| Vwa5a   | Q99KC8 | 551 | LAAG(*)SLIQT(*)               | K4  | 13.77 | 45.03  | -         | 0.931506 | -                  |
| Unc45a  | Q99KD5 | 653 | VK(*)TESPVLTNCS(+57.02)R(*)   | K2  | 32.27 | 1000   | 1.9285714 | 1.203125 | -                  |
| Rbm10   | Q99KG3 | 920 | ETLHK(*)TMVTR(*)              | K5  | 49.53 | 1000   | 0.8505747 | 0.723076 | 0.758241(0.7772978 |

|        |        |     |                                 |     |       |        |           |          |                    |
|--------|--------|-----|---------------------------------|-----|-------|--------|-----------|----------|--------------------|
| Rbm10  | Q99KG3 | 670 | ENFK(*)NSFQPISALR(*)            | K4  | 28.89 | 1000   | -         | -        | 0.879120879        |
| Stk24  | Q99KH8 | 26  | ADPEELFTK(*)LEK(*)              | K9  | 51.68 | 49.37  | -         | 1.181818 | 0.96875 1.0752841  |
| Aco2   | Q99KI0 | 689 | AIITK(*)SFAR(*)                 | K5  | 94.41 | 1000   | 0.7979797 | 0.792207 | 0.869565 0.8199176 |
| Aco2   | Q99KI0 | 50  | YDLLEK(*)NINIVR(*)              | K6  | 83.46 | 1000   | 0.6464646 | 0.636363 | 0.739130 0.6739862 |
| Aco2   | Q99KI0 | 411 | C(+57.02)K(*)SQFTITPGSEQIR(*)   | K2  | 70.62 | 1000   | 0.5454545 | -        | -                  |
| Aco2   | Q99KI0 | 31  | AK(*)VAMSHFEPSEYIR(*)           | K2  | 27.34 | 1000   | 1.1818181 | 0.766233 | - 0.974026         |
| Dctn2  | Q99KJ8 | 290 | LQSVLGK(*)VNEIAK(*)             | K7  | 69.46 | 102.92 | 0.8461538 | 0.831168 | 0.933333 0.8702187 |
| Dctn2  | Q99KJ8 | 65  | VGTK(*)GLDFSDR(*)               | K4  | 66.5  | 1000   | -         | 1.103896 | 1.155555 1.1297258 |
| Dctn2  | Q99KJ8 | 309 | ASVEDADTQNK(*)VHQLYETIQR(*)     | K11 | 56.56 | 1000   | 1.0549450 | 1.363636 | 1.044444 1.154342  |
| Dctn2  | Q99KJ8 | 185 | LLLQLEATK(*)SSK(*)              | K9  | 49.77 | 50.22  | 0.8791208 | 1.246753 | 0.9 1.0086247      |
| Dctn2  | Q99KJ8 | 146 | QLAALK(*)QQLVASHLEK(*)          | K6  | 42.41 | 83.29  | 0.7692307 | 1.259740 | 0.866666 0.9652126 |
| Dctn2  | Q99KJ8 | 140 | LTPVVLAK(*)QLAALK(*)            | K8  | 19.15 | 38     | -         | -        | 1.322222 1.3222222 |
| Dpp3   | Q99KK7 | 629 | LQVLK(*)STGDVVAGR(*)            | K5  | 81.11 | 1000   | 0.8686868 | 0.844155 | 1 0.9042809        |
| Dpp3   | Q99KK7 | 209 | VVGQEGK(*)SHYEVIR(*)            | K7  | 59.65 | 1000   | 0.9797979 | 1.129870 | 1.010869 1.0401792 |
| Dpp3   | Q99KK7 | 131 | VILGSK(*)AAQQR(*)PEEVIR(*)      | K6  | 6.62  | 1000   | -         | -        | 1.326086957        |
| Dpp3   | Q99KK7 | 202 | LFK(*)VVGQEGK(*)                | K3  | 4.3   | 35.03  | -         | -        | 0.369565217        |
| Hars2  | Q99KK9 | 443 | AEMLYK(*)NNPK(*)                | K6  | 27.08 | 77.13  | -         | -        | 21.11702128        |
| Ciao1  | Q99KN2 | 53  | IWGTEGDSWIC(+57.02)K(*)SVLSEG   | K12 | 34.89 | 1000   | -         | -        | 1.376470588        |
| Clint1 | Q99KN9 | 268 | GEFK(*)DEEETVTTK(*)HIHITQATETTT | K13 | 64.8  | 45.63  | 0.8947368 | -        | 1.147727 1.0212321 |
| Clint1 | Q99KN9 | 291 | TANPSK(*)TIDLGAAHYTGDK(*)       | K6  | 44.31 | 55.05  | 0.6736842 | 0.810810 | 1.090909 0.858468  |
| Clint1 | Q99KN9 | 200 | NK(*)SAFPFSDK(*)                | K2  | 27.38 | 53.45  | 2.7368421 | -        | -                  |
| Clint1 | Q99KN9 | 473 | SQNTDMVQK(*)SASK(*)             | K9  | 24.43 | 77.51  | 1.2       | 0.945945 | 4.193181 2.1130426 |
| Prpf19 | Q99KP6 | 179 | LQDK(*)ATVLTTER(*)              | K4  | 76.46 | 1000   | 0.9042553 | 0.893333 | 0.988095 0.9285613 |
| Prpf19 | Q99KP6 | 428 | NFK(*)TLQLDNNFEVK(*)            | K3  | 67.9  | 170.43 | 0.9042553 | 0.84     | 0.988095 0.9107835 |
| Nampt  | Q99KQ4 | 469 | VTK(*)SYSFDEVR(*)               | K3  | 58.82 | 1000   | 0.9340659 | 0.641025 | 1.081395 0.8854956 |
| Lactb2 | Q99KR3 | 191 | IK(*)ANIIYPGHGPVIHNAEAK(*)      | K2  | 13.9  | 129.03 | 0.7816091 | 0.810810 | - 0.79621          |
| Lactb2 | Q99KR3 | 255 | DVPENLHK(*)MAEHNLLLHLR(*)       | K8  | 12.18 | 1000   | -         | -        | 1.423076923        |
| Ppif   | Q99KR7 | 166 | TDWLDGK(*)HVVFGHVK(*)           | K7  | 75.36 | 71.07  | 1.0731707 | 0.829545 | 0.897727 0.9334812 |
| Ppif   | Q99KR7 | 72  | ADVVPK(*)TAENFR(*)              | K6  | 65.75 | 1000   | 1.7804878 | 1.125    | 1.284090 1.3965262 |
| Ppif   | Q99KR7 | 90  | GFGYK(*)GSTFHR(*)               | K5  | 39.36 | 1000   | -         | -        | 0.75               |
| Gak    | Q99KY4 | 443 | MFLDAK(*)HPGHYAVYNLSPR(*)       | K6  | 23.72 | 1000   | -         | -        | 0.094339623        |
| Pagr1a | Q99L02 | 202 | LDK(*)VLSDMK(*)                 | K3  | 40.12 | 129.72 | -         | -        | -                  |
| St13   | Q99L47 | 362 | VMNLISK(*)LSAK(*)               | K7  | 48.48 | 55.21  | 1.1808510 | 0.827160 | 1.032967 1.0136595 |
| St13   | Q99L47 | 355 | YQSNPK(*)VMNLISK(*)             | K6  | 38.61 | 110.43 | 1.3085106 | 0.888888 | - 1.0986998        |

|         |        |     |                                |     |       |        |           |          |             |           |
|---------|--------|-----|--------------------------------|-----|-------|--------|-----------|----------|-------------|-----------|
| St13    | Q99L47 | 50  | AK(*)SEENTK(*)EEK(*)           | K2  | 23.46 | 78.19  | -         | 0.987654 | -           |           |
| St13    | Q99L47 | 152 | LAILYAK(*)R(*)                 | K7  | 15.38 | 1000   | 1.1489361 | 0.839506 | -           | 0.9942212 |
| Nmd3    | Q99L48 | 39  | SK(*)VDISQGVPK(*)              | K2  | 14.72 | 143.22 | 1.4404761 | -        | 1.21875     | 1.3296131 |
| Mcrs1   | Q99L90 | 68  | K(*)FDDELVESSLAK(*)SSTR(*)     | K13 | 32.41 | 126.66 | -         | -        | -           |           |
| Mcrs1   | Q99L90 | 68  | FDDELVESSLAK(*)SSTR(*)         | K12 | 11.55 | 1000   | -         | -        | -           |           |
| Mat2b   | Q99LB6 | 209 | VQFSNK(*)SANMDHWQQR(*)         | K6  | 55.12 | 1000   | 1.0104166 | 0.723684 | 0.881720    | 0.8719404 |
| Etfa    | Q99LC5 | 206 | LTK(*)SDR(*)PELTGAK(*)         | K3  | 15.51 | 118.06 | -         | 1.142857 | 1.287356    | 1.2151067 |
| Eif2b1  | Q99LC8 | 110 | NK(*)IANLC(+57.02)HTFIK(*)     | K2  | 28.13 | 82.84  | -         | -        | 1.270833333 |           |
| Gps1    | Q99LD4 | 418 | STTFEK(*)SLLMGK(*)             | K6  | 45.47 | 95.51  | -         | 1.054054 | 1.034090    | 1.0440725 |
| Gps1    | Q99LD4 | 447 | NQIHVK(*)SPPR(*)               | K6  | 29.09 | 1000   | -         | -        | 2.386363636 |           |
| Gps1    | Q99LD4 | 402 | IDSHSK(*)ILYAR(*)              | K6  | 12.58 | 1000   | -         | -        | 1.727272727 |           |
| Abcf2   | Q99LE6 | 320 | YYTGNVDQYVK(*)TR(*)            | K11 | 53.6  | 1000   | 0.9468085 | 0.666666 | -           | 0.8067376 |
| Abcf2   | Q99LE6 | 344 | MK(*)NYIAR(*)                  | K2  | 53.42 | 1000   | 1         | -        | 0.978723    | 0.9893617 |
| Abcf2   | Q99LE6 | 613 | SK(*)LVDEEPQLTK(*)             | K2  | 18.63 | 119.76 | 0.5212765 | -        | 0.223404    | 0.3723404 |
| Rtcb    | Q99LF4 | 17  | INK(*)NC(+57.02)WR(*)          | K3  | 35.83 | 1000   | 1.1134020 | 0.986666 | -           | 1.0500344 |
| Rtcb    | Q99LF4 | 366 | VEQHVVDGK(*)ER(*)              | K9  | 34.84 | 1000   | -         | -        | 1.25        |           |
| Rtcb    | Q99LF4 | 357 | IAK(*)VEQHVVDGK(*)             | K3  | 34.38 | 203.33 | -         | 1.346666 | 0.909090    | 1.1278788 |
| Rtcb    | Q99LF4 | 251 | MGIDHK(*)GQVC(+57.02)VMIHSGS   | K6  | 24.76 | 1000   | 1         | 0.8      | 1.022727    | 0.9409091 |
| Tnp02   | Q99LG2 | 182 | FLQFFK(*)HC(+57.02)SPK(*)      | K6  | 54.72 | 79.02  | 0.8172043 | -        | 0.864583    | 0.8408938 |
| Tnp02   | Q99LG2 | 852 | DMFYK(*)ILHGFK(*)              | K5  | 13.16 | 71.75  | -         | -        | 1.697916667 |           |
| Gnl2    | Q99LH1 | 55  | GK(*)VIK(*)PLQYQSTVASGTVAR(*)  | K2  | 27.48 | 47.36  | 1.5833333 | 1.797101 | -           | 1.6902174 |
| Hgs     | Q99LI8 | 422 | MK(*)SNHMR(*)                  | K2  | 28.57 | 1000   | -         | -        | 1.445454545 |           |
| Clp1    | Q99LI9 | 127 | VMVVGPTDVGK(*)STVC(+57.02)R(*) | K11 | 42.77 | 1000   | 0.1527377 | -        | -           |           |
| Grpel1  | Q99LP6 | 157 | VFTK(*)HGLLR(*)                | K4  | 78.91 | 1000   | 1.1590909 | 0.891566 | 1.034090    | 1.0282494 |
| Grpel1  | Q99LP6 | 196 | EPGTVALVSK(*)VGK(*)            | K10 | 26.31 | 63.97  | 1.2045454 | 0.987951 | 0.943181    | 1.0452264 |
| Dpy30   | Q99LT0 | 92  | NK(*)AQFEDR(*)                 | K2  | 51.4  | 1000   | 0.6907216 | -        | 1.043010    | 0.8668662 |
| Chmp1b1 | Q99LU0 | 59  | QK(*)NQGVNFLR(*)               | K2  | 53.03 | 1000   | 0.5906735 | 0.948717 | 0.893129    | 0.8108404 |
| Gins4   | Q99LZ3 | 142 | EYMDHTETHFK(*)NVALK(*)         | K11 | 57.36 | 38.32  | 1.0105263 | -        | -           |           |
| Lias    | Q99M04 | 360 | AGEFFLK(*)NLVAR(*)             | K7  | 8.17  | 1000   | -         | -        | 1.363636364 |           |
| Rnps1   | Q99M28 | 203 | MHPHLSK(*)GYAYVEFENPDEAEK(*)   | K7  | 36.38 | 145.13 | -         | -        | 1.851351351 |           |
| Rnps1   | Q99M28 | 221 | ALK(*)HMDGGQIDGQEITATAVLAPV    | K3  | 5.57  | 1000   | -         | -        | 1.878378378 |           |
| Hspa14  | Q99M31 | 248 | LFK(*)HDVR(*)                  | K3  | 68.05 | 1000   | 1.0421052 | 0.764705 | 1.088888    | 0.9652333 |
| Nck1    | Q99M51 | 47  | NSMKN(*)TGFVPSNYVER(*)         | K5  | 7.22  | 1000   | -         | -        | 1.034883721 |           |
| Nasp    | Q99MD9 | 241 | GK(*)SISGAYVQNK(*)             | K2  | 94.56 | 252.77 | 1.1931818 | 0.884615 | 0.870967    | 0.9829216 |

|         |        |      |                                |     |       |        |           |          |             |           |
|---------|--------|------|--------------------------------|-----|-------|--------|-----------|----------|-------------|-----------|
| Nasp    | Q99MD9 | 239  | TEQESLC(+57.02)TEK(*)GK(*)     | K10 | 33.57 | 22.85  | 1.1931818 | 1.307692 | 0.870967    | 1.1239473 |
| Wdr6    | Q99ME2 | 96   | VVK(*)VSWGQSHLR(*)             | K3  | 18.11 | 1000   | -         | -        | 1.315068493 |           |
| Gtpbp4  | Q99ME9 | 36   | TPTVIHK(*)HYQIHR(*)            | K7  | 72.1  | 1000   | 0.9255319 | 0.768292 | 1.120481    | 0.9381022 |
| Gtpbp4  | Q99ME9 | 352  | GNK(*)VNEVLNR(*)               | K3  | 56.29 | 1000   | 0.4574468 | -        | 0.939759    | 0.6986029 |
| Gtpbp4  | Q99ME9 | 203  | TTK(*)SLFVGHMDYK(*)            | K3  | 40.33 | 189.31 | 0.7127659 | 0.634146 | 1.156626    | 0.8345129 |
| Gtpbp4  | Q99ME9 | 36   | K(*)TPTVIHK(*)HYQIHR(*)        | K8  | 35.3  | 79.54  | 0.6808510 | -        | 0.975903    | 0.8283773 |
| Erc1    | Q99MI1 | 439  | NK(*)VEQLK(*)EELSSK(*)         | K2  | 45.73 | 139.79 | 0.6228070 | -        | 0.688679    | 0.6557431 |
| Erc1    | Q99MI1 | 319  | LLEMLQSK(*)GLSAK(*)            | K8  | 29.76 | 70.86  | -         | 1.151515 | 0.735849    | 0.9436821 |
| Kars1   | Q99MN1 | 162  | NYK(*)SEEEFVHINN(*)            | K3  | 67.2  | 195.68 | 0.9270833 | 0.867469 | 0.978494    | 0.9243493 |
| Kars1   | Q99MN1 | 139  | ASGGK(*)LIFYDLR(*)             | K5  | 58.67 | 1000   | 1.0104166 | 0.927710 | 1           | 0.9793758 |
| Kars1   | Q99MN1 | 361  | MLSGMVK(*)SITGSYK(*)           | K7  | 58.65 | 127.53 | 0.9479166 | 0.867469 | 1.096774    | 0.9707202 |
| Kars1   | Q99MN1 | 173  | SEEEFVHINN(*)LR(*)             | K11 | 34.56 | 1000   | -         | -        | 0.559139785 |           |
| Kars1   | Q99MN1 | 19   | LSK(*)NELK(*)                  | K3  | 20.26 | 88.98  | -         | 0.987951 | 0.967741    | 0.9778469 |
| Srrt    | Q99MR6 | 734  | HIFNK(*)HAEK(*)                | K5  | 52.2  | 76.73  | 1         | 0.932432 | 1.172413    | 1.0349487 |
| Srrt    | Q99MR6 | 418  | PLHK(*)TC(+57.02)SLFMR(*)      | K4  | 49.4  | 1000   | 0.5384615 | 0.608108 | 1.137931    | 0.7615002 |
| Srrt    | Q99MR6 | 610  | VLDK(*)LLLYLR(*)               | K4  | 9.81  | 1000   | -         | -        | 1.896551724 |           |
| Adar    | Q99MU3 | 885  | YNHHTAK(*)NSIFELAR(*)          | K7  | 38.11 | 1000   | -         | -        | -           |           |
| Raf1    | Q99N57 | 462  | QTAQGMDYLHAK(*)NIIHR(*)        | K12 | 25.94 | 1000   | -         | -        | 1.191176471 |           |
| Mrps18b | Q99N84 | 97   | NNK(*)VAGNPC(+57.02)PIC(+57.02 | K3  | 26.06 | 1000   | 1.0471698 | -        | 1.493975    | 1.2705729 |
| Mrps18a | Q99N85 | 45   | IQEGK(*)TTVIEGR(*)             | K5  | 30.11 | 1000   | -         | 0.464566 | 1.524390    | 0.9944786 |
| Mrps18a | Q99N85 | 171  | WNK(*)VGMVAVGSPLLK(*)          | K3  | 28.24 | 81.27  | -         | -        | 0.280487805 |           |
| Mrpl27  | Q99N92 | 128  | GAVLYK(*)TFVHVVPK(*)PEGTFK(*)  | K6  | 37.52 | 43     | 1.1445783 | -        | 0.204301    | 0.6744397 |
| Mrpl9   | Q99N94 | 192  | HFFK(*)NLGVVAPHALR(*)          | K4  | 39.25 | 1000   | -         | -        | 0.946428571 |           |
| Mrpl9   | Q99N94 | 246  | YK(*)HWLAQQAQK(*)              | K2  | 31.36 | 159.26 | 1.6129032 | -        | 0.839285    | 1.2260945 |
| Mrpl9   | Q99N94 | 58   | WWK(*)VPLAGEGR(*)              | K3  | 25.91 | 1000   | 0.4731182 | -        | 0.830357    | 0.6517377 |
| Mrpl3   | Q99N95 | 116  | DGQK(*)HAVTLLQVQDC(+57.02)HV   | K4  | 20.13 | 88.91  | -         | 1.179775 | -           |           |
| Mrpl3   | Q99N95 | 150  | IAALTVGKK(*)TVSR(*)            | K9  | 15.01 | 1000   | -         | 0.662921 | 0.688073    | 0.6754974 |
| Sf3b1   | Q99NB9 | 1025 | LTPILK(*)NR(*)                 | K6  | 80.61 | 1000   | 1.0869565 | 0.946666 | 1           | 1.0112077 |
| Sf3b1   | Q99NB9 | 6    | IAK(*)THEDIEAQIR(*)            | K3  | 74.5  | 1000   | 1.0869565 | 0.893333 | 0.887640    | 0.9559768 |
| Sf3b1   | Q99NB9 | 816  | TEILPPFFK(*)HFWQHR(*)          | K9  | 58.09 | 1000   | 1.0869565 | -        | 0.977528    | 1.0322423 |
| Sf3b1   | Q99NB9 | 926  | VK(*)PYLPQIC(+57.02)GTVLWR(*)  | K2  | 42.02 | 1000   | -         | -        | 1.157303371 |           |
| Sf3b1   | Q99NB9 | 741  | GK(*)GLAAFLK(*)                | K2  | 31.51 | 138.97 | 0.9782608 | 1.44     | 1.101123    | 1.1731282 |
| Sf3b1   | Q99NB9 | 252  | GSETPGATPGSK(*)IWDPTPSHTPAG    | K12 | 29.42 | 1000   | 1.3913043 | 0.8      | -           | 1.0956522 |
| Sf3b1   | Q99NB9 | 554  | HLLVK(*)VIDR(*)                | K5  | 13.27 | 1000   | -         | 0.853333 | 0.820224    | 0.836779  |

|         |        |      |                                  |     |       |        |           |          |             |           |
|---------|--------|------|----------------------------------|-----|-------|--------|-----------|----------|-------------|-----------|
| Sf3b1   | Q99NB9 | 298  | WDETPK(*)TER(*)                  | K6  | 10.45 | 1000   | -         | 1.773333 | 0.898876    | 1.3361049 |
| Hspbp1  | Q99P31 | 92   | EEVEQMK(*)NC(+57.02)LR(*)        | K7  | 63.71 | 1000   | 0.8217821 | 0.7      | 1.052083    | 0.8579552 |
| Hspbp1  | Q99P31 | 247  | VK(*)SAFLLQNLLVGHPCHK(*)         | K2  | 50.9  | 273.37 | 0.7326732 | 0.633333 | 0.791666    | 0.7192244 |
| Hspbp1  | Q99P31 | 205  | VK(*)ALFAISC(+57.02)LVR(*)       | K2  | 17.75 | 1000   | -         | -        | 1.083333333 |           |
| Nuf2    | Q99P69 | 402  | IK(*)SAIQQLR(*)                  | K2  | 27.18 | 1000   | -         | -        | 1.130434783 |           |
| Rtn4    | Q99P72 | 1036 | GVIQAIQK(*)SDEGHPFR(*)           | K8  | 80.63 | 1000   | 1.0109890 | 0.866666 | 1.056818    | 0.978158  |
| Rtn4    | Q99P72 | 760  | ESLTVSETVTQHK(*)HK(*)            | K14 | 60.55 | 20.41  | 1         | 0.773333 | -           | 0.8866667 |
| Rtn4    | Q99P72 | 1028 | IYK(*)GVIQAIQK(*)                | K3  | 49.53 | 150.63 | -         | -        | 0.886363636 |           |
| Rtn4    | Q99P72 | 314  | DK(*)EDLVC(+57.02)SAALHNPQESP    | K2  | 46.61 | 93.92  | -         | -        | 0.738636364 |           |
| Rtn4    | Q99P72 | 910  | DEAHVSDEFSK(*)SR(*)              | K11 | 20.97 | 1000   | 0.7472527 | 2.733333 | 1.329545    | 1.6033772 |
| Nup155  | Q99P88 | 1100 | VLSK(*)LADMHSTEISLQQR(*)         | K4  | 28.8  | 1000   | 0.6105263 | 1.513513 | -           | 1.0620199 |
| Rrbp1   | Q99PL5 | 1368 | VGAEEEELHK(*)SR(*)               | K10 | 78.52 | 1000   | 0.0588235 | -        | -           |           |
| Rrbp1   | Q99PL5 | 1135 | SK(*)C(+57.02)EELSSLHGQLK(*)     | K2  | 62.35 | 243.69 | 0.9411764 | 0.934210 | 1.043956    | 0.9731143 |
| Rrbp1   | Q99PL5 | 1406 | EHTSHLEAELEK(*)HMAAASAEC(+57.02) | K12 | 49.39 | 121.4  | 1.4313725 | -        | 0.890109    | 1.1607412 |
| Rrbp1   | Q99PL5 | 1570 | LQELLK(*)TTQEQLTK(*)             | K6  | 37.63 | 66.64  | -         | -        | 0.846153846 |           |
| Rrbp1   | Q99PL5 | 1374 | VTVK(*)HLEDIVEK(*)               | K4  | 29.54 | 154.74 | 1.0098039 | 1.171052 | 0.989010    | 1.0566225 |
| Rrbp1   | Q99PL5 | 1486 | LK(*)TQLER(*)                    | K2  | 27.35 | 1000   | 1.1862745 | -        | 0.912087    | 1.0491812 |
| Rrbp1   | Q99PL5 | 890  | TGVIQDTHWK(*)ATQK(*)             | K10 | 10.4  | 25.11  | 1.1764705 | -        | 2.164835    | 1.6706529 |
| Ubxn6   | Q99PL6 | 202  | LQNK(*)VFQER(*)                  | K4  | 29.76 | 1000   | 0.4595744 | 0.229166 | 1.3         | 0.6629137 |
| Gtf2a1  | Q99PM3 | 49   | TLWENK(*)LMQSR(*)                | K6  | 27.94 | 1000   | -         | -        | 0.452631579 |           |
| Trim33  | Q99PP7 | 778  | TAEK(*)SAHSFK(*)                 | K4  | 92.22 | 151.86 | 0.6571428 | 0.925    | 0.71875     | 0.7669643 |
| Trim33  | Q99PP7 | 968  | GK(*)TAQGLSPVDQR(*)              | K2  | 79.26 | 1000   | 0.6142857 | 0.9125   | 0.671875    | 0.7328869 |
| Trim33  | Q99PP7 | 784  | SAHSFK(*)SDQVK(*)                | K6  | 37.18 | 95.62  | 0.4       | 0.5375   | 0.484375    | 0.4739583 |
| Arhgdia | Q99PT1 | 52   | YK(*)EALLGR(*)                   | K2  | 93.31 | 1000   | 1.0416666 | 1.051948 | 1.151162    | 1.0815925 |
| Arhgdia | Q99PT1 | 141  | IDK(*)TDYM(+15.99)VGSYGPR(*)     | K3  | 83.3  | 1000   | 0.9270833 | 1.077922 | 0.965116    | 0.9900406 |
| Dhx30   | Q99PU8 | 785  | TK(*)VSC(+57.02)LETVWVSR(*)      | K2  | 15.97 | 1000   | 1.0254237 | 1        | 0.990654    | 1.0053593 |
| Prpf8   | Q99PV0 | 609  | DLK(*)HLIYYR(*)                  | K3  | 82.79 | 1000   | 0.8958333 | 1.025641 | 1.153846    | 1.0251068 |
| Prpf8   | Q99PV0 | 746  | AK(*)ADWWTNTAHYNR(*)             | K2  | 81.47 | 1000   | 0.7916666 | 0.935897 | 0.912087    | 0.879884  |
| Prpf8   | Q99PV0 | 833  | FSPIFPPLSYK(*)HDTK(*)            | K12 | 73.9  | 34.3   | 0.6770833 | 0.615384 | 0.802197    | 0.6982219 |
| Prpf8   | Q99PV0 | 1158 | AVFWDIK(*)NR(*)                  | K7  | 69.2  | 1000   | 0.7291666 | 0.692307 | 1.032967    | 0.8181471 |
| Prpf8   | Q99PV0 | 1144 | LMK(*)HDVNLGR(*)                 | K3  | 68.78 | 1000   | 1.0208333 | 1.153846 | 1.241758    | 1.1388126 |
| Prpf8   | Q99PV0 | 2049 | TVNK(*)HGDEITSTTSNYETQTFSSK(*)   | K4  | 60.11 | 189.27 | 1.1875    | 1.551282 | 0.934065    | 1.2242827 |
| Prpf8   | Q99PV0 | 1344 | WSK(*)QTDVGITHFR(*)              | K3  | 53.72 | 1000   | 0.8125    | 1.153846 | 1.043956    | 1.0034341 |
| Prpf8   | Q99PV0 | 1792 | VTIHK(*)TFEGNLTTK(*)             | K5  | 52.94 | 135.47 | 0.75      | 0.897435 | 0.813186    | 0.8202076 |

|        |        |      |                               |     |       |        |           |          |           |           |
|--------|--------|------|-------------------------------|-----|-------|--------|-----------|----------|-----------|-----------|
| Prpf8  | Q99PV0 | 428  | ALDIPLVK(*)NWYR(*)            | K8  | 49.65 | 1000   | 0.7395833 | 1.461538 | 0.967032  | 1.0560516 |
| Prpf8  | Q99PV0 | 1840 | WK(*)TAE EVAALIR(*)           | K2  | 49.38 | 1000   | 0.8645833 | 1.038461 | 0.879120  | 0.9273886 |
| Prpf8  | Q99PV0 | 555  | LTK(*)LVVD SHVQYR(*)          | K3  | 48.58 | 1000   | 0.7916666 | 0.615384 | 0.813186  | 0.7400794 |
| Prpf8  | Q99PV0 | 1434 | HTLAYDK(*)GWR(*)              | K7  | 42.71 | 1000   | 0.7291666 | -        | 1.153846  | 0.9415064 |
| Prpf8  | Q99PV0 | 1449 | QYQVLK(*)QNPFW WTHQR(*)       | K6  | 39.98 | 1000   | -         | -        | 1         |           |
| Prpf8  | Q99PV0 | 460  | ALK(*)HR(*)PPK(*)             | K3  | 14.5  | 79.02  | 0.7604166 | -        | -         |           |
| Prpf8  | Q99PV0 | 853  | EAYSVK(*)SR(*)                | K6  | 7.57  | 1000   | 1.6666666 | 1.371794 | 1.307692  | 1.4487179 |
| Ndufa5 | Q9CPP6 | 36   | TLDILK(*)HFPK(*)              | K6  | 69.22 | 87.62  | 0.9090909 | 0.694444 | 0.857142  | 0.8202261 |
| Atp5mg | Q9CPQ8 | 61   | IIQSAK(*)TGSFK(*)             | K6  | 91.88 | 100.21 | 0.9368421 | 1        | 1.042553  | 0.9931318 |
| Atp5mg | Q9CPQ8 | 66   | TGSFK(*)HLTVK(*)              | K5  | 90.74 | 127.18 | 0.9894736 | 0.857142 | 0.925531  | 0.9240495 |
| Rwdd4  | Q9CPR1 | 177  | GWNWVDVVK(*)HLSK(*)           | K9  | 36.5  | 48.12  | -         | -        | 0.8181818 |           |
| Rpl17  | Q9CPR4 | 96   | MLK(*)NAESNAELK(*)            | K3  | 95.84 | 166.66 | 0.9411764 | 0.864197 | 0.967391  | 0.9242551 |
| Rpl17  | Q9CPR4 | 13   | YSLDPENPTK(*)SC(+57.02)K(*)   | K10 | 92.15 | 29.32  | 0.7352941 | 0.740740 | 0.880434  | 0.7854899 |
| Rpl17  | Q9CPR4 | 27   | VHFK(*)NTR(*)                 | K4  | 78.54 | 1000   | 0.9705882 | 0.925925 | 1         | 0.9655047 |
| Rpl17  | Q9CPR4 | 74   | C(+57.02)AQAK(*)QWGW TQGR(*)  | K5  | 66.71 | 1000   | 0.7745098 | 0.938271 | 0.956521  | 0.8897677 |
| Rpl17  | Q9CPR4 | 96   | SAEFLHMLK(*)NAESNAELK(*)      | K10 | 65.25 | 130.84 | 1         | -        | 0.967391  | 0.9836957 |
| Rpl17  | Q9CPR4 | 37   | ETAQAIK(*)GMHIR(*)            | K7  | 49.52 | 1000   | 1         | 0.679012 | 0.978260  | 0.8857577 |
| Rpl17  | Q9CPR4 | 159  | EQIVPK(*)PEEEVAQK(*)          | K6  | 48.25 | 43.13  | -         | 1.148148 | 0.934782  | 1.0414654 |
| Rpl17  | Q9CPR4 | 96   | K(*)SAEFLHMLK(*)NAESNAELK(*)  | K11 | 43.79 | 33.35  | -         | -        | 1.043478  | 0.8261    |
| Rpl17  | Q9CPR4 | 96   | LLHMLK(*)NAESNAELK(*)         | K6  | 25.64 | 58.98  | -         | -        | 0.597826  | 0.87      |
| Nanp   | Q9CPT3 | 211  | ATVWINK(*)SGR(*)              | K7  | 94.9  | 1000   | -         | -        | -         |           |
| Mydgf  | Q9CPT4 | 138  | SEEFVTK(*)TAVSHR(*)PGAFK(*)   | K8  | 90.61 | 36.4   | 1         | 0.72     | -         | 0.86      |
| Mydgf  | Q9CPT4 | 130  | ESDVPLK(*)SEEFVTK(*)          | K7  | 72.38 | 92.08  | 0.8461538 | -        | 0.883720  | 0.8649374 |
| Mydgf  | Q9CPT4 | 138  | ESDVPLK(*)SEEFVTK(*)TAVSHR(*) | K15 | 53.41 | 49.35  | 0.7802197 | -        | 0.941860  | 0.8610401 |
| Mydgf  | Q9CPT4 | 138  | SEEFVTK(*)TAVSHR(*)           | K8  | 29.3  | 1000   | -         | 1.266666 | 1.023255  | 1.1449612 |
| Mydgf  | Q9CPT4 | 93   | PQGK(*)SYLYFTQFK(*)           | K4  | 28.44 | 148.12 | -         | -        | 1.081395  | 0.349     |
| Glo1   | Q9CPU0 | 88   | SEK(*)TAWTFSR(*)              | K3  | 20.05 | 1000   | -         | 1.039473 | -         |           |
| Mrpl42 | Q9CPV3 | 120  | VFYTTK(*)HR(*)                | K6  | 53.49 | 1000   | -         | -        | -         |           |
| Pmf1   | Q9CPV5 | 60   | FTTC(+57.02)YK(*)HFHQLNPEVTQR | K6  | 60.58 | 1000   | 1.0144927 | 1.326086 | 0.925925  | 1.0888352 |
| Arpc5  | Q9CPW4 | 67   | NPPINTK(*)SQAVK(*)            | K7  | 79.83 | 51     | 0.8953488 | 0.986301 | 0.853932  | 0.9118609 |
| Arpc5  | Q9CPW4 | 112  | YIYK(*)GFESPSDNSSAVLLQWHEK(*) | K4  | 63.64 | 193.56 | 1.4534883 | -        | 1.370786  | 1.4121374 |
| Arpc5  | Q9CPW4 | 87   | VLISFK(*)ANDIEK(*)            | K6  | 20.61 | 64.21  | -         | -        | 1.235955  | 0.5056    |
| Ssr2   | Q9CPW5 | 27   | LLASK(*)SLLNR(*)              | K5  | 93.25 | 1000   | -         | -        | -         |           |
| Zmat2  | Q9CPW7 | 8    | A(+42.01)SGSGTK(*)NLDFR(*)    | K7  | 87.21 | 1000   | -         | -        | -         |           |



|           |        |     |                                  |     |       |        |           |          |             |           |
|-----------|--------|-----|----------------------------------|-----|-------|--------|-----------|----------|-------------|-----------|
| Zmat2     | Q9CPW7 | 55  | DYK(*)VDLESK(*)                  | K3  | 49.64 | 112.31 | -         | -        | -           |           |
| Atg3      | Q9CPX6 | 185 | AK(*)ADAGGEDAILQTR(*)            | K2  | 38.33 | 1000   | 0.4021739 | 0.76     | 0.8         | 0.654058  |
| Mrpl51    | Q9CPY1 | 119 | ISYLYK(*)HFNR(*)                 | K6  | 46.25 | 1000   | -         | 1        | -           |           |
| Lap3      | Q9CPY7 | 356 | NGK(*)TIQVDNTDAEGR(*)            | K3  | 35.01 | 1000   | -         | -        | 0.806451613 |           |
| Chmp3     | Q9CQ10 | 6   | GLFGK(*)TQEK(*)PPK(*)            | K5  | 64.65 | 111.84 | 0.7395833 | 0.458333 | 0.549180    | 0.5823657 |
| Chmp3     | Q9CQ10 | 92  | AHMNSVLMGMK(*)NQLAVLR(*)         | K11 | 47.38 | 1000   | 0.96875   | -        | -           |           |
| Chmp3     | Q9CQ10 | 81  | LYASK(*)AHMNSVLMGMK(*)           | K5  | 45.27 | 35.27  | 0.8958333 | -        | 0.770491    | 0.8331626 |
| Chmp3     | Q9CQ10 | 106 | VAGSLQK(*)STEVMMK(*)             | K7  | 36.7  | 90.16  | 0.6041666 | -        | 0.434426    | 0.5192964 |
| Mcts2     | Q9CQ21 | 18  | ESVSNC(+57.02)IQLK(*)TSVIK(*)    | K10 | 46.84 | 64.28  | 0.8367346 | 1.134831 | 0.654205    | 0.8752573 |
| Stambp    | Q9CQ26 | 107 | AEELK(*)TELLR(*)                 | K5  | 14    | 1000   | -         | -        | 8.397959184 |           |
| Decr1     | Q9CQ62 | 106 | ATAEEISSK(*)TGNK(*)              | K9  | 56.96 | 58.99  | 0.96875   | -        | 0.962962    | 0.9658565 |
| Mtap      | Q9CQ65 | 51  | IK(*)NVDC(+57.02)VLLAR(*)        | K2  | 95.99 | 1000   | 1.0217391 | 0.822784 | 1.022988    | 0.9558375 |
| Mtap      | Q9CQ65 | 147 | GVC(+57.02)HIPMAEPFC(+57.02)PI   | K14 | 88.91 | 1000   | 0.7826086 | 0.620253 | 0.954022    | 0.7856283 |
| Mtap      | Q9CQ65 | 271 | NLK(*)NMAQFSVLPPR(*)             | K3  | 66.48 | 1000   | 0.7934782 | 0.645569 | 0.954022    | 0.7976903 |
| Vps25     | Q9CQ80 | 161 | ALQALQQEHK(*)AEIITVSDGR(*)       | K10 | 9.6   | 1000   | -         | -        | 0.975409836 |           |
| Tspan31   | Q9CQ88 | 153 | TK(*)SSTC(+57.02)QMC(+57.02)GEI  | K2  | 47.33 | 1000   | 0.84      | 0.629629 | 0.976744    | 0.8154579 |
| Trappc5   | Q9CQA1 | 9   | GK(*)SALLER(*)                   | K2  | 57.95 | 1000   | 0.5403726 | 0.653465 | 0.579710    | 0.5911827 |
| Sdhb      | Q9CQA3 | 82  | IK(*)NEVDSTLTFR(*)               | K2  | 81.38 | 1000   | 0.8584905 | 0.593406 | 0.855670    | 0.7691891 |
| Bzw1      | Q9CQC6 | 191 | LFK(*)SWINEK(*)                  | K3  | 97.7  | 113.05 | 0.8191489 | 0.820512 | 0.988505    | 0.8760558 |
| Bzw1      | Q9CQC6 | 390 | GK(*)SVFLEQMK(*)                 | K2  | 94.39 | 175.25 | 0.7659574 | 0.794871 | 0.896551    | 0.819127  |
| Bzw1      | Q9CQC6 | 319 | EELVAEQAIK(*)HLK(*)              | K10 | 63.68 | 47.36  | 0.8829787 | 0.807692 | 0.931034    | 0.8739018 |
| Bzw1      | Q9CQC6 | 368 | YK(*)AEVLSEEPILK(*)              | K2  | 50.72 | 195.68 | -         | -        | 1.057471264 |           |
| Bzw1      | Q9CQC6 | 140 | LLLFLK(*)GFSESER(*)              | K6  | 36.26 | 1000   | 1.5       | -        | 0.712643    | 1.1063218 |
| Bzw1      | Q9CQC6 | 116 | AQVFNK(*)LIR(*)                  | K6  | 8.13  | 1000   | -         | 0.782051 | -           |           |
| Spg21     | Q9CQC8 | 124 | FAEYTHK(*)SPR(*)                 | K7  | 19.18 | 1000   | -         | 1.296296 | -           |           |
| Chmp1b2   | Q9CQD4 | 59  | QK(*)NQAINFLR(*)                 | K2  | 79.2  | 1000   | 0.7661290 | 1.069444 | 0.813559    | 0.8830443 |
| Chmp1b2   | Q9CQD4 | 97  | SMAGVVK(*)SMDATLR(*)             | K7  | 59.41 | 1000   | 0.5564516 | 0.736111 | 0.593220    | 0.6285944 |
| Chmp1b2   | Q9CQD4 | 6   | S(+42.01)NMEK(*)HLFNLK(*)        | K5  | 57.81 | 176.18 | 0.75      | 1.097222 | 0.940677    | 0.9293001 |
| Chmp1b2   | Q9CQD4 | 6   | M(+42.01)EK(*)HLFNLK(*)          | K3  | 42.47 | 143.14 | 0.7016129 | 0.902777 | 0.771186    | 0.791859  |
| Nipsnap3b | Q9CQE1 | 48  | TYFLK(*)PSK(*)TNEFLENFK(*)       | K8  | 64.01 | 22.45  | 0.6226415 | -        | 0.887640    | 0.755141  |
| Mrps17    | Q9CQE3 | 78  | HVK(*)HELAEIFK(*)                | K3  | 62.73 | 222.06 | 0.8190476 | 0.676767 | 1.602272    | 1.032696  |
| RTRAF     | Q9CQE8 | 234 | INEAIVAVQAIADPK(*)TDHR(*)        | K16 | 34.57 | 1000   | -         | -        | 1.103092784 |           |
| Mrpl11    | Q9CQF0 | 115 | EVAGLVSLK(*)HVYEIAC(+57.02)VK(*) | K9  | 26.32 | 31.37  | 1.4239130 | -        | 1.242105    | 1.3330092 |
| Nudt21    | Q9CQF3 | 189 | ALFAVPK(*)NYK(*)                 | K7  | 70.91 | 22.34  | -         | 0.807228 | 0.979166    | 0.8931978 |

|         |        |     |                                |     |       |        |           |          |          |             |
|---------|--------|-----|--------------------------------|-----|-------|--------|-----------|----------|----------|-------------|
| Mtres1  | Q9CQF4 | 158 | NK(*)VEDAFYK(*)                | K2  | 44.14 | 79.39  | -         | 1.243589 | 0.879518 | 1.0615539   |
| Snrpb2  | Q9CQI7 | 111 | AK(*)TMEQAAAAANK(*)            | K2  | 85.63 | 306.51 | 0.9072164 | 0.878378 | 0.890109 | 0.8919016   |
| Snrpb2  | Q9CQI7 | 85  | IQYAK(*)TDSDIISK(*)            | K5  | 59.49 | 118.18 | 0.7216494 | 0.554054 | 0.857142 | 0.7109488   |
| Pih1d1  | Q9CQJ2 | 57  | PGFC(+57.02)VK(*)TNSSEGK(*)    | K6  | 72.52 | 32.62  | -         | -        | 0.819148 | 0.819148936 |
| Rnf2    | Q9CQJ4 | 133 | INK(*)HNNQQUALSHSIEEGLK(*)     | K3  | 10.34 | 30.61  | -         | -        | 1.191011 | 1.191011236 |
| Mrpl20  | Q9CQL4 | 26  | VQEVVK(*)HAQHFR(*)             | K6  | 38.74 | 1000   | 1.2307692 | 1.657142 | 1.255813 | 1.381242    |
| Glrx3   | Q9CQM9 | 153 | LTHAAPC(+57.02)MLFMK(*)GTPQE   | K12 | 62.05 | 1000   | 0.8350515 | 0.839506 | 0.824175 | 0.8329112   |
| Glrx3   | Q9CQM9 | 165 | C(+57.02)GFSK(*)QMVEILHK(*)    | K5  | 29.06 | 112.87 | -         | 0.888888 | 0.901098 | 0.8949939   |
| Trap1   | Q9CQN1 | 377 | VLIQTK(*)AADILPK(*)            | K6  | 71.94 | 122.76 | -         | -        | 1.044943 | 1.04494382  |
| Trap1   | Q9CQN1 | 216 | MVADK(*)VEVYSR(*)              | K5  | 67.26 | 1000   | -         | -        | 0.752808 | 0.752808989 |
| Trap1   | Q9CQN1 | 260 | IIHLK(*)SDC(+57.02)K(*)        | K6  | 59.24 | 61.37  | 0.9797979 | 0.719512 | -        | 0.8496551   |
| Trap1   | Q9CQN1 | 631 | MQQLAK(*)TQEER(*)              | K6  | 51.1  | 1000   | 1.0909090 | 0.719512 | 1.056179 | 0.9555337   |
| Trap1   | Q9CQN1 | 260 | IIHLK(*)SDC(+57.02)K(*)DFASESR | K6  | 42.09 | 42.68  | 0.8282828 | 0.475609 | 1.022471 | 0.7754548   |
| Trap1   | Q9CQN1 | 89  | GSVSK(*)HEFQATK(*)             | K5  | 40.81 | 193.63 | 1.5252525 | -        | 1.056179 | 1.2907162   |
| Trap1   | Q9CQN1 | 600 | VTNVK(*)VTFR(*)                | K5  | 27.74 | 1000   | -         | -        | 1.179775 | 1.179775281 |
| Trap1   | Q9CQN1 | 334 | FTLHYK(*)TDAPLNIR(*)           | K6  | 23.78 | 1000   | 1.3939393 | 1.268292 | -        | 1.331116    |
| Atp5pb  | Q9CQQ7 | 225 | HVVK(*)SISVQQEK(*)             | K4  | 89.46 | 172.06 | 1         | 0.929411 | 1.011111 | 0.9801743   |
| Atp5pb  | Q9CQQ7 | 210 | R(*)K(*)EEEHMIDWVEK(*)         | K2  | 85.91 | 235.98 | 1.0707070 | 0.729411 | 0.988888 | 0.9296692   |
| Atp5pb  | Q9CQQ7 | 221 | EEEHMIDWVEK(*)HVVK(*)          | K11 | 72.7  | 49.79  | 1.6161616 | -        | 1.522222 | 1.5691919   |
| Atp5pb  | Q9CQQ7 | 221 | R(*)K(*)EEEHMIDWVEK(*)HVVK(*)  | K13 | 63.74 | 88.98  | 1.1515151 | 0.952941 | 0.811111 | 0.9718558   |
| Atp5pb  | Q9CQQ7 | 221 | K(*)EEEHMIDWVEK(*)HVVK(*)      | K12 | 61.15 | 48.12  | 0.7878787 | 0.811764 | 0.966666 | 0.8554367   |
| Rps21   | Q9CQR2 | 74  | LAK(*)ADGIVSK(*)               | K3  | 91.48 | 158.8  | 0.8333333 | 0.790697 | -        | 0.8120155   |
| Acot13  | Q9CQR4 | 17  | VMFK(*)VPGFDR(*)               | K4  | 32.39 | 1000   | -         | 0.796460 | 0.404624 | 0.6005422   |
| Nop10   | Q9CQS2 | 53  | FK(*)VLMTQQPR(*)               | K2  | 48.92 | 1000   | 0.9666666 | 1.025641 | 0.793814 | 0.9287074   |
| Rab5if  | Q9CQT9 | 27  | VSVWSK(*)VLR(*)                | K6  | 61.9  | 1000   | -         | -        | -        | -           |
| Txndc12 | Q9CQU0 | 30  | TGLGK(*)GFGDHIHWR(*)           | K5  | 61.06 | 1000   | -         | 0.523255 | 1.082352 | 0.8028044   |
| Ywhab   | Q9CQV8 | 5   | T(+42.01)MDK(*)SELVQK(*)       | K4  | 62.87 | 95.35  | 0.9285714 | 0.8125   | 1.311827 | 1.0176331   |
| Ywhab   | Q9CQV8 | 5   | M(+42.01)TMDK(*)SELVQK(*)      | K5  | 57.72 | 87.26  | 1.0306122 | 0.925    | 0.924731 | 0.9601145   |
| Ywhab   | Q9CQV8 | 70  | VISSIEQK(*)TER(*)              | K8  | 23.96 | 1000   | -         | -        | 1.634408 | 1.634408602 |
| Ykt6    | Q9CQW1 | 11  | LYSLSVLYK(*)GDPK(*)            | K9  | 34.1  | 52.86  | -         | -        | 0.527472 | 0.527472527 |
| Ykt6    | Q9CQW1 | 173 | LDDLVS(*)SEVLGTQSK(*)          | K7  | 23.11 | 148.12 | -         | 1.636363 | 0.648351 | 1.1423576   |
| Psmc9   | Q9CR00 | 210 | WAGK(*)GLLGC(+57.02)NIPLQR(*)  | K4  | 38.44 | 1000   | 0.6938775 | -        | 1.117021 | 0.9054494   |
| Psmc9   | Q9CR00 | 30  | R(*)K(*)EEIEAEIK(*)            | K2  | 29.67 | 89.48  | -         | -        | 0.755319 | 0.755319149 |
| Ufc1    | Q9CR09 | 47  | YVENNK(*)NSDNDWFR(*)           | K6  | 25.76 | 1000   | -         | 1.320512 | -        | -           |

|          |        |     |                                |     |       |        |           |           |             |           |
|----------|--------|-----|--------------------------------|-----|-------|--------|-----------|-----------|-------------|-----------|
| Ufc1     | Q9CR09 | 17  | VVSEIPVLK(*)TNAGPR(*)          | K9  | 14.58 | 1000   | 0.9387755 | -         | 0.84375     | 0.8912628 |
| Ppid     | Q9CR16 | 111 | FEDENFHYK(*)HDR(*)             | K9  | 80.22 | 1000   | 1.1052631 | 0.986842  | 1           | 1.0307018 |
| Ppid     | Q9CR16 | 349 | AIQAECLK(*)VK(*)               | K8  | 34.36 | 36.05  | -         | 1.078947  | 0.824175    | 0.9515616 |
| Ppid     | Q9CR16 | 64  | GTGSTTGK(*)PLHFK(*)            | K8  | 33.96 | 61.26  | -         | -         | 0.395604396 |           |
| Ppid     | Q9CR16 | 145 | LDGK(*)HVVFGQVIK(*)            | K4  | 26.01 | 178.84 | 0.9789473 | 1.065789  | 0.813186    | 0.9526412 |
| Slc25a11 | Q9CR62 | 162 | GYK(*)NVFNALVR(*)              | K3  | 65.86 | 1000   | 0.7701149 | 0.6111111 | 0.858823    | 0.7466832 |
| Slc25a11 | Q9CR62 | 73  | TSFHALTSILK(*)TEGLK(*)         | K11 | 32.02 | 25.91  | 0.7931034 | -         | 1.282352    | 1.0377282 |
| Slc25a11 | Q9CR62 | 62  | EYK(*)TSFHALTSILK(*)           | K3  | 17.44 | 176.98 | 1.1149425 | 1.5833333 | 1.258823    | 1.3190331 |
| Slc25a11 | Q9CR62 | 256 | MIDGK(*)PEYK(*)                | K5  | 14.28 | 22.99  | 1.6666666 | -         | -           |           |
| Slc25a11 | Q9CR62 | 57  | MQLSGEGAK(*)TR(*)              | K9  | 8.63  | 1000   | -         | -         | 0.364705882 |           |
| Tmem167a | Q9CR64 | 36  | NK(*)TGLLGIFWK(*)              | K2  | 66.2  | 250.15 | 1         | -         | 0.754901    | 0.877451  |
| Tmem33   | Q9CR67 | 134 | VLDK(*)GSNSPLLR(*)             | K5  | 68.65 | 1000   | 0.7916666 | 0.626506  | 0.891304    | 0.7698257 |
| Lage3    | Q9CR70 | 52  | NSSK(*)SMVPLTQR(*)             | K4  | 65.72 | 1000   | 0.5543478 | 0.265486  | -           | 0.4099173 |
| Fam136a  | Q9CR98 | 99  | DSMDAGTK(*)ELQVK(*)            | K8  | 11.59 | 100.21 | -         | -         | 1.361904762 |           |
| Golph3   | Q9CRA5 | 224 | VQEAVLDK(*)WVNDPHR(*)          | K8  | 20.45 | 1000   | -         | 1.1111111 | 0.836956    | 0.9740338 |
| Exosc5   | Q9CRA8 | 73  | EIFNK(*)ATLEVILR(*)PK(*)       | K5  | 36.33 | 67.81  | -         | -         | 0.913043478 |           |
| Chchd3   | Q9CRB9 | 157 | SSEFYK(*)VTTEEQK(*)            | K6  | 17.08 | 85.91  | -         | -         | 1.660377358 |           |
| Gnpda2   | Q9CRC9 | 160 | LK(*)TLAMDTILANAK(*)           | K2  | 43.29 | 204.37 | -         | -         | 0.934782609 |           |
| Gnpda2   | Q9CRC9 | 256 | YFK(*)GLMHVHNK(*)              | K3  | 36.25 | 118.18 | -         | -         | 0.869565217 |           |
| Xpot     | Q9CRT8 | 951 | VFK(*)NYLK(*)                  | K3  | 19.31 | 72.09  | 0.7731958 | -         | 0.945652    | 0.859424  |
| Xpot     | Q9CRT8 | 554 | FVK(*)SLNK(*)                  | K3  | 9.01  | 68.07  | 1.1958762 | -         | -           |           |
| Ecd      | Q9CS74 | 250 | VFK(*)TFLPETR(*)               | K3  | 24.83 | 1000   | 1.4375    | 0.616666  | 1.013888    | 1.0226852 |
| Ecd      | Q9CS74 | 463 | AFISK(*)VSSHK(*)               | K5  | 10.02 | 22.36  | 2.109375  | -         | -           |           |
| Dis3     | Q9CSH3 | 118 | DVTNNQEK(*)HFYFTTNEHHK(*)      | K8  | 60.47 | 116.72 | 0.9684210 | 0.868421  | 0.880434    | 0.905759  |
| Dis3     | Q9CSH3 | 579 | FTK(*)SVINSK(*)                | K3  | 54.69 | 102.87 | -         | -         | 0.847826087 |           |
| Dis3     | Q9CSH3 | 242 | LQQGIK(*)SGSYLQGTFR(*)         | K6  | 51.69 | 1000   | 0.8526315 | 0.578947  | 1.097826    | 0.843135  |
| Dis3     | Q9CSH3 | 281 | EILIQIK(*)HLNR(*)              | K8  | 43.15 | 1000   | -         | -         | 0.880434783 |           |
| Dis3     | Q9CSH3 | 709 | SK(*)NLQIK(*)                  | K2  | 8.74  | 115.97 | 1.1157894 | -         | 1.086956    | 1.101373  |
| Snw1     | Q9CSN1 | 441 | GGK(*)DMAQSIYR(*)PSK(*)        | K3  | 37.19 | 194.69 | -         | -         | 0.946236559 |           |
| Snw1     | Q9CSN1 | 339 | AGIK(*)THVEK(*)                | K4  | 8.73  | 61.3   | -         | 0.8       | 0.806451    | 0.8032258 |
| Ranbp3   | Q9CT10 | 337 | LFVFDK(*)TSQSWVER(*)           | K6  | 50.44 | 1000   | 0.75      | 0.695121  | 0.885416    | 0.7768462 |
| Fcf1     | Q9CTH6 | 137 | LPC(+57.02)THK(*)GTYADDC(+57.0 | K6  | 32.38 | 1000   | 0.8695652 | -         | 1.267605    | 1.0685854 |
| Smc1a    | Q9CU62 | 540 | VLGK(*)NMDAIIVDSEK(*)          | K4  | 64.74 | 159.14 | -         | 0.829268  | 0.881720    | 0.8554944 |
| Smc1a    | Q9CU62 | 536 | YQIAVTK(*)VLGK(*)              | K7  | 56.85 | 63.97  | 0.7052631 | 0.365853  | 0.741935    | 0.6043508 |

|         |        |      |                                |     |       |        |           |          |                     |
|---------|--------|------|--------------------------------|-----|-------|--------|-----------|----------|---------------------|
| Smc1a   | Q9CU62 | 110  | INNK(*)VVQLHEYSEELEK(*)        | K4  | 53.73 | 67.11  | -         | -        | 0.946236559         |
| Smc1a   | Q9CU62 | 637  | HK(*)TVALDGTFLFQK(*)           | K2  | 46.48 | 160.69 | 0.7789473 | 0.158536 | 0.73118270.5562222  |
| Smc1a   | Q9CU62 | 13   | LIEIENFK(*)SYK(*)              | K8  | 33.64 | 26.52  | 1.3052631 | 1.158536 | 0.9247311.1.1295103 |
| Smc1a   | Q9CU62 | 536  | K(*)YQIAVTK(*)VLGK(*)          | K8  | 28.91 | 52.86  | 0.8315789 | 0.890243 | 0.6344080.7854105   |
| Smc1a   | Q9CU62 | 324  | SLQNAQK(*)HYK(*)               | K7  | 21.3  | 57.45  | 1.0315789 | -        | 1.1612901.1.0964346 |
| Zmym2   | Q9CU65 | 787  | GEMK(*)HFC(+57.02)DQHC(+57.02  | K4  | 16.64 | 1000   | 2.1875    | -        | 1.942.06375         |
| Arpc2   | Q9CVB6 | 295  | TITGK(*)TFSSR(*)               | K5  | 82    | 1000   | -         | 0.846153 | 0.9032250.8746898   |
| Arpc2   | Q9CVB6 | 269  | AK(*)TSDFLK(*)                 | K2  | 72.5  | 108.85 | 0.8804347 | 0.602564 | 1.0967740.8599244   |
| Arpc2   | Q9CVB6 | 256  | DYLHYHIK(*)C(+57.02)SK(*)      | K8  | 13.67 | 34.94  | -         | 1.807692 | 1.0967741.4522333   |
| Smc3    | Q9CW03 | 629  | HVFGK(*)TLIC(+57.02)R(*)       | K5  | 85.2  | 1000   | 0.9484536 | 0.85     | 0.9230760.9071768   |
| Smc3    | Q9CW03 | 624  | AFK(*)HVFGK(*)                 | K3  | 72.71 | 119.54 | 0.8969072 | 0.9375   | 1.0109890.9484654   |
| Smc3    | Q9CW03 | 1194 | NK(*)VSHIDVITAEMAK(*)          | K2  | 67.65 | 163.91 | 0.8556701 | 0.9      | 0.9560430.9039047   |
| Smc3    | Q9CW03 | 106  | VIGAK(*)K(*)DQYFLDK(*)         | K6  | 61.21 | 163.4  | 2.1649484 | 1.875    | 1.6703290.903426    |
| Smc3    | Q9CW03 | 105  | VIGAK(*)K(*)DQYFLDK(*)         | K5  | 61.21 | 188.52 | 2.1649484 | 1.875    | 1.6703290.903426    |
| Smc3    | Q9CW03 | 1038 | QVSK(*)NFSEVFQK(*)             | K4  | 51.54 | 62.55  | 0.8762886 | 0.775    | 1.2307690.960686    |
| Smc3    | Q9CW03 | 26   | DQTIVDPFSSK(*)HNVIVGR(*)       | K11 | 14.34 | 1000   | -         | 0.8      | 1.1428570.9714286   |
| Golga1  | Q9CW79 | 690  | EINFEYLK(*)HVVVK(*)            | K8  | 9.75  | 23.7   | -         | -        | 0.646258503         |
| Ndufaf7 | Q9CWG8 | 47   | IK(*)STGPITVAEYMK(*)           | K2  | 21.4  | 186.68 | -         | 0.605263 | 10.8026316          |
| Ndufaf7 | Q9CWG8 | 302  | IASTGGAALIADYGHGDTK(*)TDTLR(*) | K19 | 16.35 | 1000   | -         | -        | 1.89010989          |
| Bccip   | Q9CWI3 | 233  | TFMEAGK(*)SSSR(*)              | K7  | 32.17 | 1000   | 0.9680851 | -        | 0.9583330.9632092   |
| Atic    | Q9CWJ9 | 406  | SLFSNIVTK(*)NK(*)              | K9  | 83.59 | 27.83  | -         | 0.871794 | 0.9213480.8965716   |
| Atic    | Q9CWJ9 | 66   | VK(*)TLHPAVHAGILAR(*)          | K2  | 80.92 | 1000   | 1.0752688 | 0.717948 | 1.1123590.9685257   |
| Atic    | Q9CWJ9 | 461  | LAGDK(*)ANSWWLR(*)             | K5  | 73    | 1000   | 1.3440860 | 0.717948 | 0.9550561.005697    |
| Atic    | Q9CWJ9 | 266  | GAVDIPAAASF(*)HVSPPAGAAVGP     | K12 | 55.38 | 1000   | 0.5806451 | -        | 10.7903226          |
| Atic    | Q9CWJ9 | 199  | QYSK(*)GISQMPLR(*)             | K4  | 46.51 | 1000   | -         | 0.589743 | -                   |
| Atic    | Q9CWJ9 | 14   | SVSDK(*)TGLVEFAR(*)            | K5  | 43.38 | 1000   | -         | -        | 0.97752809          |
| Atic    | Q9CWJ9 | 397  | NNGVVVK(*)SLFSNIVTK(*)         | K7  | 40.41 | 142.42 | -         | -        | 0.898876404         |
| Atic    | Q9CWJ9 | 137  | AAAK(*)NHAR(*)                 | K4  | 12.85 | 1000   | -         | -        | 0.966292135         |
| Snx2    | Q9CWL8 | 167  | VTTK(*)TSLSMFSK(*)             | K4  | 63.28 | 72.62  | -         | -        | 1.769230769         |
| Snx2    | Q9CWL8 | 248  | TVK(*)HPTLLQDPDLR(*)           | K3  | 50.23 | 1000   | 1.1585365 | 0.921052 | 0.8681310.9825737   |
| Snx2    | Q9CWL8 | 456  | EWEAK(*)VQQGER(*)              | K5  | 46.59 | 1000   | 1.0609756 | 0.907894 | 0.7802190.9163634   |
| Snx2    | Q9CWL8 | 116  | IESK(*)SISAPVIFDR(*)           | K4  | 36.48 | 1000   | 1.1097560 | -        | -                   |
| Snx2    | Q9CWL8 | 447  | IQQAK(*)NEIR(*)                | K5  | 9.81  | 1000   | -         | 1.078947 | -                   |
| Ctnnbl1 | Q9CWL8 | 95   | SYK(*)NQELR(*)                 | K3  | 45.59 | 1000   | -         | -        | 1.104166667         |

|         |        |     |                                 |     |       |        |           |          |                    |
|---------|--------|-----|---------------------------------|-----|-------|--------|-----------|----------|--------------------|
| Cnot11  | Q9CWN7 | 490 | LLK(*)TLDTGETPSETK(*)           | K3  | 40.52 | 126.79 | -         | -        | 1.513888889        |
| Mospd2  | Q9CWP6 | 199 | IVK(*)SWLGPEAVSLLK(*)           | K3  | 42.77 | 167.97 | 0.6018518 | -        | 0.901785;0.7518188 |
| Nup37   | Q9CWU9 | 219 | MSAHWC(+57.02)LK(*)NTFK(*)      | K8  | 17.59 | 28.7   | 0.9887640 | -        | 1.712643;1.3507039 |
| Mcm8    | Q9CWV1 | 210 | ATC(+57.02)YGK(*)YISIR(*)       | K6  | 48.09 | 1000   | -         | -        | -                  |
| Sugt1   | Q9CX34 | 212 | VLSTK(*)IEIK(*)                 | K5  | 45.84 | 64.53  | 1.1515151 | 0.701298 | 0.869565;0.9074597 |
| Sugt1   | Q9CX34 | 60  | AYC(+57.02)HILLGK(*)YR(*)       | K9  | 27.48 | 1000   | -         | -        | 0.782608696        |
| Psm8    | Q9CX56 | 141 | LTK(*)QQLILAR(*)                | K3  | 90.34 | 1000   | 0.9890109 | 0.873417 | 0.977528;0.9466523 |
| Psm8    | Q9CX56 | 230 | IK(*)HPVSLEQYLMEGSYNK(*)        | K2  | 41.5  | 230.7  | -         | -        | 0.629213483        |
| Psm8    | Q9CX56 | 230 | VYIK(*)HPVSLEQYLMEGSYNK(*)      | K4  | 38.64 | 186.26 | -         | -        | 1.325842697        |
| L3hypdh | Q9CXA2 | 299 | AFK(*)SSATGSVFTGC(+57.02)AVR(*) | K3  | 29.64 | 1000   | -         | -        | -                  |
| Tmed5   | Q9CXE7 | 164 | LEDILESINSIK(*)SR(*)            | K12 | 54.01 | 1000   | -         | -        | 0.663265306        |
| Tmed5   | Q9CXE7 | 169 | LSK(*)SGHIQTLLR(*)              | K3  | 37.6  | 1000   | -         | -        | 1.193877551        |
| Tbc1d15 | Q9CXF4 | 235 | SK(*)VTNYIFDSLRL(*)             | K2  | 48.54 | 1000   | -         | -        | 1.26744186         |
| Tbc1d15 | Q9CXF4 | 563 | QQIMAK(*)HYGFNEILK(*)           | K6  | 40.97 | 43     | 0.5980392 | 1.379746 | 1.023255;1.0003473 |
| Tbc1d15 | Q9CXF4 | 572 | HYGFNEILK(*)HINELSMK(*)         | K9  | 34.82 | 89.48  | 1.6078431 | -        | 0.906976;1.2574099 |
| Manf    | Q9CXI5 | 154 | GC(+57.02)AEK(*)SDYIR(*)        | K5  | 74.86 | 1000   | 0.7096774 | 0.837837 | -                  |
| Manf    | Q9CXI5 | 149 | ILDDWGEMC(+57.02)K(*)GC(+57.0   | K10 | 35.65 | 55.6   | -         | -        | 1.813186813        |
| Nip7    | Q9CXK8 | 96  | YK(*)VWVK(*)PGAEQSFLYGNHVLK(*)  | K2  | 39.48 | 105.6  | -         | -        | 0.936842105        |
| Nip7    | Q9CXK8 | 115 | VWVK(*)PGAEQSFLYGNHVLK(*)SGL    | K19 | 23.8  | 124.59 | 0.9795918 | -        | -                  |
| Rbm33   | Q9CXK9 | 987 | QLPHK(*)VLQVK(*)                | K5  | 38.3  | 55.6   | 0.5384615 | 0.528735 | -                  |
| Rbm33   | Q9CXK9 | 945 | LLVK(*)NQDITTASVQPK(*)          | K4  | 28.37 | 164.29 | 1.4615384 | 1.114942 | -                  |
| Rbm33   | Q9CXK9 | 987 | QLPHK(*)VLQVK(*)PMDMEETPHSP     | K5  | 7.01  | 23.7   | -         | 0.873563 | -                  |
| Dhrs7   | Q9CXR1 | 321 | IQNFK(*)NNLDPDLPYK(*)           | K5  | 36.71 | 118.06 | 0.6610169 | -        | 2.049180;1.3550986 |
| Med10   | Q9CXU0 | 106 | FK(*)SLLIQELSK(*)               | K2  | 57.21 | 154.31 | -         | 0.728260 | 0.916666;0.8224638 |
| Mrps22  | Q9CXW2 | 80  | ILTK(*)ITGLDLQK(*)              | K4  | 56.3  | 175.25 | 1.1888888 | 0.947368 | 0.792792;0.97635   |
| Cacybp  | Q9CXW3 | 147 | VK(*)TDTVIILC(+57.02)R(*)       | K2  | 91.29 | 1000   | 0.9183673 | 0.961038 | 1.011111;0.9635058 |
| Cacybp  | Q9CXW3 | 119 | SFDLLVK(*)NLNGK(*)              | K7  | 77.5  | 77.53  | 0.8673469 | 0.805194 | 0.855555;0.8426991 |
| Cacybp  | Q9CXW3 | 213 | TINK(*)AWVESR(*)                | K4  | 39.17 | 1000   | 1.3265306 | 0.831168 | 1.222222;1.1266406 |
| Cacybp  | Q9CXW3 | 147 | K(*)VK(*)TDTVIILC(+57.02)R(*)   | K3  | 31.03 | 32.28  | -         | 0.935064 | 0.966666;0.9508658 |
| Cacybp  | Q9CXW3 | 43  | IETELK(*)NK(*)                  | K6  | 17.1  | 30.83  | 1.7142857 | -        | 1.2                |
| Rpl11   | Q9CXW4 | 169 | WFQQK(*)YDGIILPGK(*)            | K5  | 86.79 | 161.52 | 0.8080808 | 0.715909 | 0.944444;0.8228114 |
| Rpl11   | Q9CXW4 | 52  | VLEQLTGQTPVFSK(*)AR(*)          | K14 | 72.72 | 1000   | 0.8787878 | 0.772727 | 0.988888;0.8801347 |
| Rpl11   | Q9CXW4 | 78  | GAK(*)AEEILEK(*)                | K3  | 62.77 | 142.27 | 0.9090909 | -        | -                  |
| Snx7    | Q9CY18 | 322 | LEDK(*)VEC(+57.02)ANNALK(*)     | K4  | 11.82 | 95.39  | -         | -        | 1.361904762        |



|         |        |     |                                 |     |       |        |           |          |          |           |
|---------|--------|-----|---------------------------------|-----|-------|--------|-----------|----------|----------|-----------|
| Tecr    | Q9CY27 | 38  | TLFTK(*)THPQWYPAR(*)            | K5  | 73.53 | 1000   | 1.0227272 | 0.75     | 1.011235 | 0.9279877 |
| Tecr    | Q9CY27 | 57  | GK(*)SLK(*)DEDVLQK(*)           | K2  | 48.39 | 62.75  | 1.0568181 | 0.789473 | 0.955056 | 0.9337827 |
| Tecr    | Q9CY27 | 2   | M(+15.99)K(*)HYEVEIR(*)         | K2  | 43.49 | 1000   | -         | 1.157894 | -        | -         |
| Tecr    | Q9CY27 | 16  | EK(*)LC(+57.02)FLDK(*)          | K2  | 16.97 | 62.39  | 1.4772727 | -        | 0.707865 | 1.0925689 |
| Chtop   | Q9CY57 | 82  | LGK(*)SNIQAR(*)                 | K3  | 9.63  | 1000   | 0.9361702 | -        | -        | -         |
| Serbp1  | Q9CY58 | 326 | GFVLHK(*)SK(*)                  | K6  | 88.19 | 22.87  | 1.0744680 | 1.089743 | 1.022727 | 1.062313  |
| Serbp1  | Q9CY58 | 52  | EAGGGGVGGPGAK(*)SAAQAAQTN       | K13 | 77.25 | 210.26 | -         | 1.102564 | 1.079545 | 1.0910548 |
| Serbp1  | Q9CY58 | 328 | SK(*)SEEHAEDSVMDHHFR(*)         | K2  | 75.48 | 1000   | 1.1063829 | 1.025641 | 1.147727 | 1.0932504 |
| Serbp1  | Q9CY58 | 211 | SSFHYSGLK(*)HEDK(*)R(*)         | K10 | 72.51 | 69.71  | 1.0531914 | 1.038461 | 0.988636 | 1.0267631 |
| Serbp1  | Q9CY58 | 302 | AK(*)VEFNIR(*)                  | K2  | 68.37 | 1000   | 0.8723404 | 0.897435 | 1.068181 | 0.945986  |
| Serbp1  | Q9CY58 | 211 | SSFHYSGLK(*)HEDK(*)             | K10 | 16.3  | 34.3   | 1.4255319 | -        | 1.375    | 1.400266  |
| Serbp1  | Q9CY58 | 140 | R(*)FEK(*)PLEEK(*)              | K4  | 15.15 | 61.3   | -         | -        | 0.818181 | 0.818181  |
| Blvra   | Q9CY64 | 233 | FK(*)SGSLEEVPNVGVNK(*)          | K2  | 47.14 | 189.02 | -         | -        | 0.629629 | 0.629629  |
| Blvra   | Q9CY64 | 233 | HISIHFK(*)SGSLEEVPNVGVNK(*)     | K7  | 26.68 | 42.26  | 2.0714285 | -        | -        | -         |
| Gar1    | Q9CY66 | 123 | EQVGK(*)VDEIFGQLR(*)            | K5  | 54.08 | 1000   | 1         | 0.925    | 0.848214 | 0.9244048 |
| Mrpl44  | Q9CY73 | 99  | TAFINSC(+57.02)YIK(*)SEEAK(*)   | K10 | 27.13 | 37.78  | 1.0948275 | 1.067164 | 0.710144 | 0.9573789 |
| Dsn1    | Q9CYC5 | 174 | ASSLSEELK(*)HFTDR(*)            | K9  | 25.82 | 1000   | -         | -        | -        | -         |
| Crtap   | Q9CYD3 | 173 | AIAAAHTYLLK(*)HPDDEMMK(*)       | K11 | 14.18 | 63.64  | -         | 1.48     | -        | -         |
| Luc7l   | Q9CYI4 | 37  | VC(+57.02)K(*)SHLLDC(+57.02)C(+ | K3  | 49.1  | 1000   | -         | -        | 1.020833 | 1.020833  |
| Luc7l   | Q9CYI4 | 61  | MDLGEC(+57.02)TK(*)IHDLALR(*)   | K8  | 45.97 | 1000   | -         | 0.865671 | 1.010416 | 0.9380442 |
| Glipr2  | Q9CYL5 | 53  | ILK(*)HSPRESSR(*)               | K3  | 51.14 | 1000   | 1.0824742 | 1        | 0.897727 | 0.9934005 |
| Spcs2   | Q9CYN2 | 50  | IDK(*)WDGSAVK(*)                | K3  | 55.85 | 84.68  | 1.1170212 | 1.293333 | 1.519480 | 1.309945  |
| Spcs2   | Q9CYN2 | 57  | WDGSAVK(*)NSLDDSAK(*)           | K7  | 50.85 | 84.58  | -         | 3.413333 | 1.012987 | 2.2131602 |
| Spcs2   | Q9CYN2 | 137 | EK(*)SIFLVAHR(*)                | K2  | 20.24 | 1000   | 0.8617021 | -        | 0.701298 | 0.7815004 |
| Ssbp1   | Q9CYR0 | 81  | SGDSEVYQMGDVSQK(*)TTWHR(*)      | K15 | 35.5  | 1000   | -         | -        | 1.052631 | 1.052631  |
| Ssbp1   | Q9CYR0 | 122 | VDYGEYMDK(*)NNVR(*)             | K9  | 21.17 | 1000   | -         | -        | 2.189473 | 2.189473  |
| Ssbp1   | Q9CYR0 | 113 | IFVEGK(*)VDYGEYMDK(*)           | K6  | 16.3  | 120.76 | -         | -        | 2.073684 | 2.073684  |
| Pgm3    | Q9CYR6 | 350 | VPVYC(+57.02)TK(*)TGVK(*)       | K7  | 38.17 | 58.99  | -         | 0.638554 | 0.782178 | 0.7103662 |
| Rrp15   | Q9CYX7 | 179 | GVVQLFNAVQK(*)HQR(*)            | K11 | 73.48 | 1000   | 0.9607843 | 0.949367 | 1        | 0.9700505 |
| Tpd52l2 | Q9CYZ2 | 108 | SWHDVQVSTAYVK(*)TSEK(*)         | K13 | 23.95 | 42.89  | -         | 0.935064 | 0.896551 | 0.9158083 |
| Ssbp2   | Q9CYZ8 | 6   | GK(*)SNSSAVPSDSQAR(*)           | K2  | 96.35 | 1000   | -         | 3.25     | 0.493055 | 1.8715278 |
| Snf8    | Q9CZ28 | 53  | TNLEEFASK(*)HK(*)               | K9  | 58.34 | 24.32  | 0.8558558 | 0.770270 | 0.880434 | 0.8355203 |
| Ola1    | Q9CZ30 | 190 | VK(*)SWVIDQK(*)                 | K2  | 92.87 | 209.49 | 0.7979797 | 0.777777 | 0.978021 | 0.8512599 |
| Ola1    | Q9CZ30 | 180 | LK(*)PEYDIMC(+57.02)K(*)        | K2  | 78.31 | 124.34 | 1.3434343 | -        | 1.054945 | 1.1991897 |



|        |        |     |                                |     |       |        |           |          |             |           |
|--------|--------|-----|--------------------------------|-----|-------|--------|-----------|----------|-------------|-----------|
| Ola1   | Q9CZ30 | 216 | EIEVLNK(*)HLFLTSK(*)           | K7  | 57.91 | 128.65 | 0.8383838 | 0.691358 | 0.923076    | 0.8176063 |
| Srfbp1 | Q9CZ91 | 328 | VPSK(*)TSTLETPWDVR(*)          | K4  | 51.08 | 1000   | -         | 0.611650 | -           |           |
| Gars1  | Q9CZD3 | 409 | IYLYLTK(*)VGISPDK(*)           | K7  | 78.34 | 122.76 | 0.6489361 | 0.631578 | 0.824175    | 0.7015636 |
| Gars1  | Q9CZD3 | 543 | TFQLTK(*)DMVSVK(*)             | K6  | 77.44 | 110.2  | 0.8085106 | 0.657894 | 0.879120    | 0.7818421 |
| Gars1  | Q9CZD3 | 537 | GEFTIETEGK(*)TFQLTK(*)         | K10 | 75.81 | 121.92 | 0.8510638 | 0.723684 | 0.901098    | 0.8252823 |
| Gars1  | Q9CZD3 | 553 | FQK(*)TLHVEEVVPSVIEPSFGLGR(*)  | K3  | 68.55 | 1000   | -         | -        | 0.747252747 |           |
| Gars1  | Q9CZD3 | 467 | ATK(*)VPLVAEK(*)PLK(*)         | K3  | 51.63 | 195.71 | 0.7021276 | 0.684210 | 0.791208    | 0.725849  |
| Gars1  | Q9CZD3 | 636 | NGVSHK(*)VDDSSGSIGR(*)         | K6  | 38.68 | 1000   | 1.5957446 | 1.486842 | 1.054945    | 1.3791773 |
| Gars1  | Q9CZD3 | 467 | ATK(*)VPLVAEK(*)PLK(*)EPK(*)   | K3  | 26.84 | 104.64 | 0.7978723 | 0.815789 | 0.615384    | 0.7430155 |
| Gars1  | Q9CZD3 | 467 | ATK(*)VPLVAEK(*)               | K3  | 12.8  | 85.08  | -         | 1.302631 | 1.340659    | 1.3216455 |
| Psmg3  | Q9CZH3 | 80  | AK(*)NLVAFVSQEAGNR(*)          | K2  | 41.81 | 1000   | -         | 0.493506 | 1.019607    | 0.7565572 |
| Utp11  | Q9CZJ1 | 120 | LK(*)SELHLLDFQGK(*)            | K2  | 21.36 | 203.1  | -         | -        | 1.21978022  |           |
| Rpl15  | Q9CZM2 | 176 | GLGK(*)GHK(*)                  | K4  | 79.44 | 51.69  | -         | 1.025641 | 1.125       | 1.0753205 |
| Rpl15  | Q9CZM2 | 56  | AK(*)QGYVIYR(*)                | K2  | 72.64 | 1000   | 0.8453608 | 1.064102 | 1.181818    | 1.0304272 |
| Rpl15  | Q9CZM2 | 83  | GATYGK(*)PVHHGVNQLK(*)         | K6  | 57.52 | 62.68  | 0.8041237 | 0.974358 | 0.943181    | 0.9072215 |
| Rpl15  | Q9CZM2 | 157 | R(*)NPDTQWITK(*)PVHK(*)HR(*)   | K14 | 20.42 | 26.57  | 1.6082474 | -        | -           |           |
| Shmt2  | Q9CZN7 | 469 | LQDFK(*)SFLK(*)                | K5  | 96.79 | 105.53 | 0.84375   | 0.759036 | 0.869565    | 0.8241171 |
| Shmt2  | Q9CZN7 | 280 | YADVVTTHK(*)TLR(*)             | K11 | 79.65 | 1000   | 0.8645833 | 0.759036 | 0.945652    | 0.8564239 |
| Shmt2  | Q9CZN7 | 305 | TGK(*)EIPYTFEDR(*)             | K3  | 55.5  | 1000   | 0.9270833 | 0.771084 | 1.108695    | 0.9356211 |
| Shmt2  | Q9CZN7 | 469 | LQDFK(*)SFLK(*)DPETSQR(*)      | K5  | 44.35 | 38.19  | 1.25      | 1.277108 | 0.945652    | 1.1575869 |
| Shmt2  | Q9CZN7 | 409 | VLELVSITANK(*)NTC(+57.02)PGDR( | K11 | 40.89 | 1000   | -         | 0.578313 | 0.967391    | 0.7728523 |
| Mtrex  | Q9CZU3 | 794 | VIQK(*)VEAFEHR(*)              | K4  | 19.06 | 1000   | -         | 1.067567 | 1.337209    | 1.2023884 |
| Cs     | Q9CZU6 | 450 | PK(*)SMSTDGLMK(*)              | K2  | 96.61 | 202.16 | 0.7623762 | 0.747126 | 0.877777    | 0.7957602 |
| Cs     | Q9CZU6 | 366 | EFALK(*)HLPK(*)                | K5  | 76.13 | 97.69  | 0.7524752 | 0.563218 | 0.711111    | 0.6756016 |
| Cs     | Q9CZU6 | 215 | LPC(+57.02)VAAK(*)IYR(*)       | K7  | 72.69 | 1000   | -         | -        | 0.7         |           |
| Cs     | Q9CZU6 | 57  | QQHGK(*)TVVGQITVDDMMYGGMR(     | K5  | 48.24 | 1000   | 1.8415841 | -        | 0.922222    | 1.3819032 |
| Acsl3  | Q9CZW4 | 397 | NVMNK(*)VNEMSAFQR(*)           | K5  | 38.54 | 1000   | 0.6170212 | 1.121951 | -           | 0.8694862 |
| Acsl3  | Q9CZW4 | 706 | ELK(*)THYQADIER(*)             | K3  | 36.18 | 1000   | -         | 0.780487 | 1.104651    | 0.9425695 |
| Acsl3  | Q9CZW4 | 521 | NWEEGGYFNTDK(*)PHPR(*)         | K12 | 28.34 | 1000   | -         | -        | 1.127906977 |           |
| Acsl3  | Q9CZW4 | 509 | LK(*)NWEEGGYFNTDK(*)PHPR(*)    | K2  | 22.51 | 158.38 | -         | -        | 0.988372093 |           |
| Elp3   | Q9CZX0 | 333 | GTGLYELWK(*)SGR(*)             | K9  | 35.33 | 1000   | 0.5757575 | -        | -           |           |
| Pinx1  | Q9CZX5 | 43  | GK(*)GLGAQEQGATEHIK(*)         | K2  | 55.96 | 234.02 | 0.8673469 | 1.513513 | 0.81        | 1.0636202 |
| Rps19  | Q9CZX8 | 29  | LK(*)VPEWVDTVK(*)              | K2  | 95.31 | 158.68 | 0.8039215 | 0.790697 | 0.878787    | 0.824469  |
| Rps19  | Q9CZX8 | 77  | GGAGVGSMTK(*)IYGGR(*)          | K10 | 94.22 | 1000   | 0.9019607 | 0.883720 | 0.828282    | 0.8713215 |

|        |        |     |                                 |     |       |        |           |          |             |           |
|--------|--------|-----|---------------------------------|-----|-------|--------|-----------|----------|-------------|-----------|
| Rps19  | Q9CZX8 | 43  | HK(*)ELAPYDENWFYTR(*)           | K2  | 59.32 | 1000   | 1.0392156 | 2.767441 | 1.050505    | 1.6190542 |
| Ube2v1 | Q9CZY3 | 68  | IYSLK(*)IEC(+57.02)GPK(*)       | K5  | 89.41 | 85.43  | 0.4423076 | -        | -           |           |
| Ube2v1 | Q9CZY3 | 10  | A(+42.01)ATTGSGVK(*)VPR(*)      | K9  | 71.4  | 1000   | 1.0576923 | 0.109890 | 0.268072    | 0.4785516 |
| Ube2v1 | Q9CZY3 | 131 | LMMSK(*)ENMK(*)                 | K5  | 45.3  | 42.89  | 0.7403846 | 0.098901 | 0.240963    | 0.3600832 |
| Nt5c3a | Q9D020 | 247 | GELIHVFNK(*)HDGALK(*)           | K9  | 58.52 | 49.54  | 1.1075268 | 0.453125 | 0.833333    | 0.7979951 |
| Mpc2   | Q9D023 | 19  | LMDK(*)VELLLPK(*)               | K4  | 63.18 | 118.9  | 0.7528089 | -        | 1           | 0.8764045 |
| Ssbp3  | Q9D032 | 6   | GK(*)GSAVPSDGQAR(*)             | K2  | 42.92 | 1000   | -         | 0.532110 | -           |           |
| Arpin  | Q9D0A3 | 203 | TGASWTDNIMAQK(*)SSER(*)         | K13 | 28.48 | 1000   | 1.5789473 | 1.966666 | 1.109756    | 1.55179   |
| Pbdc1  | Q9D0B6 | 66  | LTK(*)VDDQIYSEFR(*)             | K3  | 37.75 | 1000   | 1.5744680 | -        | 0.978723    | 1.2765957 |
| Trmt5  | Q9D0C4 | 212 | DHQLPFK(*)HLIGQVMVDK(*)         | K7  | 5.24  | 21.51  | -         | -        | 1.444444444 |           |
| Gtf2e1 | Q9D0D5 | 106 | YK(*)LDHMR(*)                   | K2  | 8.16  | 1000   | -         | -        | 1.05952381  |           |
| Hnrnpm | Q9D0E1 | 133 | AAEVLNK(*)HLSLGR(*)             | K7  | 82.97 | 1000   | 1.125     | 0.9625   | 1.055555    | 1.0476852 |
| Hnrnpm | Q9D0E1 | 241 | ADILEDK(*)DGK(*)SR(*)           | K10 | 40.34 | 53.53  | 0.8645833 | 0.7875   | 0.855555    | 0.8358796 |
| Lman1  | Q9D0F3 | 415 | QVNEVK(*)NSMSETVR(*)            | K6  | 71.3  | 1000   | 0.7777777 | 0.819277 | 1.065217    | 0.8874241 |
| Rfc5   | Q9D0F6 | 65  | LPHLLLYGPPGTGK(*)TSTILAC(+57.0  | K14 | 44.11 | 161.68 | -         | -        | 0.731958763 |           |
| Pgm1   | Q9D0F9 | 8   | IVTVK(*)TQAYPDQK(*)PGTSGLR(*)   | K5  | 28.35 | 118.18 | 1.3222222 | -        | -           |           |
| Pgm1   | Q9D0F9 | 349 | VANATK(*)IALYETPTGWK(*)         | K6  | 19.96 | 158.53 | 1.1       | 1.059523 | 1.144444    | 1.1013228 |
| Mrto4  | Q9D0I8 | 71  | NK(*)VMMVALGR(*)                | K2  | 53.6  | 1000   | 0.6421052 | -        | 1.079545    | 0.8608254 |
| Mrto4  | Q9D0I8 | 109 | TK(*)EEVNEWFTK(*)               | K2  | 42.96 | 126.63 | 0.6631578 | -        | -           |           |
| Rars   | Q9D0I9 | 143 | EIAENITK(*)HLPNNK(*)            | K8  | 86.31 | 90.32  | 0.8888888 | 0.860759 | 0.934065    | 0.8945714 |
| Rars   | Q9D0I9 | 629 | VLK(*)VNMWR(*)                  | K3  | 75.82 | 1000   | 0.8484848 | 0.860759 | 1.021978    | 0.9104075 |
| Rars   | Q9D0I9 | 563 | ETK(*)IILDHEK(*)                | K3  | 68.01 | 117.63 | 0.7979797 | -        | 0.857142    | 0.8275613 |
| Rars   | Q9D0I9 | 30  | LK(*)NC(+57.02)GC(+57.02)LEASPS | K2  | 36.45 | 1000   | 0.6767676 | 0.632911 | 0.439560    | 0.5830798 |
| Arl2   | Q9D0J4 | 29  | LLMLGLDNAGK(*)TTILK(*)          | K11 | 53.94 | 55.6   | -         | -        | 1.168539326 |           |
| Oxct1  | Q9D0K2 | 436 | TK(*)VVVTMEHSAK(*)              | K2  | 61    | 187.15 | -         | 0.6375   | 0.944444    | 0.7909722 |
| Oxct1  | Q9D0K2 | 421 | MVK(*)GMGGAMDLVSSK(*)           | K3  | 50.52 | 205.45 | -         | 0.5      | 0.266666    | 0.3833333 |
| Exosc7 | Q9D0M0 | 116 | IFNNK(*)SSVDLR(*)               | K5  | 53.73 | 1000   | 1.2659574 | 1.014925 | 1.031914    | 1.1042659 |
| Cyc1   | Q9D0M3 | 310 | HK(*)WSVLK(*)                   | K2  | 74.06 | 98.37  | -         | 0.746666 | 0.977777    | 0.8622222 |
| Dynl12 | Q9D0M5 | 9   | AVIK(*)NADMSQDAVDC(+57.02)      | K4  | 53.74 | 355.38 | 0.5963302 | -        | 0.871559    | 0.733945  |
| Chaf1b | Q9D0N7 | 123 | ENWTVVK(*)TLR(*)                | K7  | 75.12 | 1000   | -         | -        | 6.211111111 |           |
| Chaf1b | Q9D0N7 | 501 | TLQTWGK(*)TAPR(*)               | K7  | 61.35 | 1000   | 0.7157894 | 0.884615 | -           | 0.8002024 |
| Chaf1b | Q9D0N7 | 501 | VTLNTLQTWGK(*)TAPR(*)           | K11 | 31.81 | 1000   | 0.9789473 | 1.038461 | 1.844444    | 1.2872845 |
| Tars1  | Q9D0R2 | 278 | IHK(*)NSSTYWEGK(*)              | K3  | 75.66 | 159.26 | 0.9130434 | 0.948051 | 1.021739    | 0.9609449 |
| Tars1  | Q9D0R2 | 123 | VNK(*)VVWDLDR(*)PLETDC(+57.02   | K3  | 22.08 | 209.87 | -         | -        | 0.913043478 |           |

|           |        |     |                                |     |       |        |           |          |                    |
|-----------|--------|-----|--------------------------------|-----|-------|--------|-----------|----------|--------------------|
| Ddx56     | Q9D0R4 | 337 | GNK(*)ASDPESGVAR(*)            | K3  | 9.01  | 1000   | -         | -        | 1.417582418        |
| Lsm12     | Q9D0R8 | 168 | IVEK(*)HFR(*)                  | K4  | 90.16 | 1000   | 0.9148936 | 0.858974 | 1.01136360.9284105 |
| Lsm12     | Q9D0R8 | 168 | K(*)IVEK(*)HFR(*)              | K5  | 62.87 | 69.71  | 0.8297872 | -        | -                  |
| Snu13     | Q9D0T1 | 44  | K(*)GANEATK(*)TLNR(*)          | K8  | 45.37 | 51.48  | 0.8888888 | -        | 0.91304340.9009662 |
| Snu13     | Q9D0T1 | 86  | SK(*)QALGR(*)                  | K2  | 8.78  | 1000   | -         | -        | 1.152173913        |
| Snu13     | Q9D0T1 | 33  | LLDLVQQSC(+57.02)NYK(*)QLR(*)  | K12 | 6.76  | 1000   | -         | -        | 1.467391304        |
| Ppil1     | Q9D0W5 | 37  | TC(+57.02)K(*)NFAELAR(*)       | K3  | 40.09 | 1000   | 0.7959183 | 0.597402 | 1.30.8977737       |
| Serpinb1a | Q9D154 | 56  | GSTAAQLSK(*)TFHFDSVEDIHSR(*)   | K9  | 37.45 | 1000   | -         | -        | 3.03125            |
| Ints12    | Q9D168 | 369 | IGSGNSTSPSVPLK(*)PLPPLTLGK(*)T | K23 | 12.62 | 46.57  | -         | -        | 0.70754717         |
| Ints12    | Q9D168 | 63  | ISSTK(*)SLSIK(*)               | K5  | 12.05 | 28.89  | -         | 0.460869 | 1.12264110.7917555 |
| Gatd3a    | Q9D172 | 217 | ALGAK(*)HC(+57.02)VK(*)        | K5  | 54.33 | 76.73  | 0.9690721 | 0.773333 | 1.01176410.9180567 |
| Cndp2     | Q9D1A2 | 402 | ALK(*)TVFGVEPDLTR(*)           | K3  | 52.14 | 1000   | 1.2584269 | 1.013333 | 0.8804341.0507317  |
| Cndp2     | Q9D1A2 | 203 | NK(*)PC(+57.02)ITYGLR(*)       | K2  | 46.48 | 1000   | 1.3146067 | 0.893333 | 1.1304341.1127916  |
| Ube2c     | Q9D1C1 | 121 | DK(*)WSALYDVR(*)               | K2  | 56    | 1000   | 0.8571428 | 0.917647 | 1.20833330.9943744 |
| Tmed10    | Q9D1D4 | 127 | IPDQLVILDMK(*)HGVEAK(*)        | K11 | 79.65 | 62.39  | 0.9714285 | 0.695121 | 1.11111110.9258872 |
| Tmed10    | Q9D1D4 | 133 | HGVEAK(*)NYEEIAK(*)            | K6  | 37.52 | 128.65 | 1.0952380 | 1.012195 | 1.26666661.1247    |
| Tmed10    | Q9D1D4 | 75  | THLK(*)ITDSAGHILYAK(*)         | K4  | 36.2  | 184.16 | 0.4857142 | 1.658536 | 0.93333331.0258614 |
| Agpat5    | Q9D1E8 | 201 | GLAVLK(*)HVLTPR(*)             | K6  | 50.85 | 1000   | -         | -        | -                  |
| Rab1b     | Q9D1G1 | 122 | LLVGNK(*)SDLTTK(*)             | K6  | 86.17 | 78.19  | 0.9130434 | 0.792207 | 1.05813910.9211303 |
| Get4      | Q9D1H7 | 58  | YMSQSK(*)HAEAR(*)              | K6  | 30.02 | 1000   | -         | 1.397435 | -                  |
| Get4      | Q9D1H7 | 209 | NK(*)NSALVVFTTYTQK(*)          | K2  | 27.3  | 265.73 | -         | 1.717948 | -                  |
| Sarnp     | Q9D1J3 | 17  | LAELK(*)QEC(+57.02)LAR(*)      | K5  | 80.87 | 1000   | 0.9814814 | 1.189873 | 0.9340651.0351403  |
|           | Q9D1K7 | 59  | VGFLK(*)ILHR(*)                | K5  | 37.29 | 1000   | 1.2261904 | 1.903225 | 1.1052631.4115598  |
| Sec13     | Q9D1M0 | 285 | ILAVSGGDNK(*)VTLWK(*)          | K10 | 57.64 | 107.29 | 0.84375   | 0.642857 | 0.94623610.8109479 |
| Sec13     | Q9D1M0 | 38  | SVK(*)IFDVR(*)                 | K3  | 47.21 | 1000   | 0.8229166 | 0.785714 | 1.04301010.8838806 |
| Eef1e1    | Q9D1M4 | 166 | QHLSSIVFIK(*)NR(*)             | K10 | 38.65 | 1000   | 1.0396039 | 1.024096 | 0.83333330.9656779 |
| Mrpl13    | Q9D1P0 | 114 | LAIYGMLPK(*)NLHR(*)            | K9  | 17.3  | 1000   | -         | -        | 0.964028777        |
| Erp44     | Q9D1Q6 | 140 | QQK(*)SNPVHEIQSLDEVTLNDR(*)    | K3  | 12.99 | 1000   | -         | -        | 1.64516129         |
| Kti12     | Q9D1R2 | 143 | AETGGK(*)SQAAGAVEEQR(*)        | K6  | 52.17 | 1000   | 0.8173076 | 1.619047 | 0.7934781.0766112  |
| Rpl34     | Q9D1R9 | 72  | TQK(*)HVSRL(*)                 | K3  | 82.63 | 1000   | -         | 0.987179 | -                  |
| Rpl34     | Q9D1R9 | 43  | APK(*)SAC(+57.02)GVC(+57.02)PG | K3  | 76.28 | 1000   | 0.9647058 | 0.910256 | 0.82954540.9015026 |
| Fam114a1  | Q9D281 | 333 | LELLK(*)NDLISIK(*)             | K5  | 38.75 | 102.62 | -         | -        | 1.011235955        |
| Fam114a1  | Q9D281 | 254 | TK(*)TLMER(*)                  | K2  | 6.06  | 1000   | -         | -        | 1.348314607        |
| Polr3h    | Q9D2C6 | 69  | LEDAYVFPGDGASHTK(*)VHFR(*)     | K16 | 27.95 | 1000   | -         | -        | -                  |

|        |        |      |                                  |     |       |        |           |           |             |
|--------|--------|------|----------------------------------|-----|-------|--------|-----------|-----------|-------------|
| Znf687 | Q9D2D7 | 1044 | LILEK(*)HVQVR(*)                 | K5  | 34.95 | 1000   | -         | -         | -           |
| Dlst   | Q9D2G2 | 268  | HK(*)DAFLK(*)                    | K2  | 38.71 | 105.53 | 1.3854166 | 1.064102  | 0.9782601   |
| Ube2v2 | Q9D2M8 | 66   | IYSLK(*)VEC(+57.02)GSK(*)        | K5  | 61.05 | 78.19  | 0.6422764 | 0.923076  | 0.9431811   |
| Ube2v2 | Q9D2M8 | 8    | A(+42.01)VSTGVK(*)VPR(*)         | K7  | 27.5  | 1000   | 0.7073170 | 0.948717  | -           |
| Aacs   | Q9D2R0 | 530  | INPK(*)TGGIIMLGR(*)              | K4  | 91.42 | 1000   | 0.9670329 | 0.897435  | 0.9662921   |
| Mau2   | Q9D2X5 | 86   | THLQLGSLVLYHHTK(*)NSEQAR(*)      | K14 | 25.63 | 1000   | -         | -         | 0.741071429 |
| Acp1   | Q9D358 | 113  | AK(*)IELLSYDPQK(*)               | K2  | 43.88 | 183.46 | -         | 0.730769  | 0.8064511   |
| Ephx1  | Q9D379 | 334  | FSTWTK(*)SEYR(*)                 | K6  | 62.04 | 1000   | 0.7111111 | 1         | -           |
| Ephx1  | Q9D379 | 288  | EK(*)VFYNIMR(*)                  | K2  | 11.14 | 1000   | 0.8888888 | -         | -           |
| Rufy3  | Q9D394 | 405  | ALK(*)HELAFAK(*)                 | K3  | 21.66 | 129.72 | -         | -         | -           |
| Stag1  | Q9D3E6 | 611  | MEK(*)HLDALLK(*)                 | K3  | 38.79 | 93.6   | 0.9421487 | -         | -           |
| Stag1  | Q9D3E6 | 626  | FVVEK(*)HVESDVLEAC(+57.02)SK(*)  | K5  | 26.71 | 98.81  | 0.9256198 | -         | 0.4495411   |
| Pus10  | Q9D3U0 | 477  | LHLK(*)TQAGTYIK(*)               | K4  | 38.1  | 66.1   | -         | -         | 0.722772277 |
| Pus10  | Q9D3U0 | 125  | GFITK(*)VC(+57.02)QK(*)          | K5  | 10.71 | 42.68  | -         | 1.752212  | -           |
| Cul2   | Q9D4H8 | 317  | MIEELQK(*)HIHDEGLR(*)            | K7  | 66.81 | 1000   | 1.0212765 | -         | 0.9247311   |
| Cul2   | Q9D4H8 | 472  | QAC(+57.02)GYEFTSK(*)LHR(*)      | K10 | 5.67  | 1000   | -         | -         | 1.397849462 |
| Phf6   | Q9D4J7 | 299  | AC(+57.02)VK(*)TYHYHC(+57.02)G   | K4  | 53.58 | 48.34  | 1.3877551 | 0.9       | 0.8764041   |
| Phf6   | Q9D4J7 | 97   | LMC(+57.02)SLC(+57.02)HC(+57.02) | K18 | 34.72 | 1000   | 0.8367346 | -         | 0.8876401   |
| Sf3a3  | Q9D554 | 264  | LK(*)SALLALGLK(*)                | K2  | 79.97 | 187.38 | 0.7575757 | 0.6666666 | 0.8488371   |
| Sf3a3  | Q9D554 | 291  | GK(*)SLESLDTSLFAK(*)             | K2  | 63.34 | 287.12 | 0.8787878 | 0.820512  | 1.1395341   |
| Atad1  | Q9D5T0 | 274  | LILK(*)NENVDR(*)                 | K4  | 73.56 | 1000   | 1.2142857 | -         | 1.0727271   |
| Sec23b | Q9D662 | 331  | ATK(*)HYEMLANR(*)                | K3  | 30.55 | 1000   | -         | -         | 0.79787234  |
| Cers5  | Q9D6K9 | 113  | GLSK(*)QLDWSVR(*)                | K4  | 12.63 | 1000   | -         | 0.775510  | -           |
| Cers5  | Q9D6K9 | 85   | DSPVVK(*)VEPNDTLEK(*)            | K6  | 10.39 | 58.98  | -         | -         | 0.934210526 |
| Ppil3  | Q9D6L8 | 80   | K(*)FEDEYSEYLK(*)HNVR(*)         | K11 | 18.5  | 62.68  | -         | 1.034482  | 1.04        |
| Drap1  | Q9D6N5 | 63   | NAK(*)TMTTSHLK(*)                | K3  | 43.41 | 89.48  | -         | -         | 0.693069307 |
| Idh3a  | Q9D6R2 | 200  | SNVTAVHK(*)ANIMR(*)              | K8  | 30.1  | 1000   | -         | -         | 1.382022472 |
| Nosip  | Q9D6T0 | 190  | TVTC(+57.02)PMSGK(*)PLR(*)       | K9  | 14.56 | 1000   | 1.6136363 | 1.179104  | 0.7394951   |
| Msra   | Q9D6Y7 | 183  | VLSK(*)HNFGPITTDIR(*)            | K4  | 51.43 | 1000   | 1.6       | 1.013888  | 0.9861111   |
| Nop56  | Q9D6Z1 | 134  | LHFHNLVK(*)GLTDL SAC(+57.02)K    | K8  | 60.7  | 130.84 | 1.3636363 | 0.585365  | 1.03125     |
| Trir   | Q9D735 | 143  | TEDEVLT SK(*)GDAWAK(*)           | K9  | 80.37 | 98.75  | 1.025     | 0.729729  | -           |
| Ppil2  | Q9D787 | 483  | QGVGK(*)YIHPAATK(*)              | K5  | 23.63 | 54.92  | 0.6489361 | 0.568181  | 1.0361441   |
| Gpx8   | Q9D7B7 | 84   | FTDK(*)SYQTLR(*)                 | K4  | 37.99 | 1000   | -         | 0.689655  | 0.9278351   |
| RtcA   | Q9D7H3 | 163  | GYYPK(*)GGGEVIVR(*)              | K5  | 62.85 | 1000   | -         | 0.659793  | 0.8068181   |

|         |        |     |                                |     |       |        |           |          |                    |
|---------|--------|-----|--------------------------------|-----|-------|--------|-----------|----------|--------------------|
| RtcA    | Q9D7H3 | 313 | IK(*)TGSVTLHTQTAIHF AEQLAK(*)  | K2  | 25.52 | 47.89  | -         | -        | 1.102272727        |
| Rpl22l1 | Q9D7S7 | 47  | VNGK(*)TG NLGNVVHIER(*)        | K4  | 39.41 | 1000   | 0.9797979 | -        | 1.688172(1.333985  |
| Rpl22l1 | Q9D7S7 | 63  | NK(*)ITVVSEK(*)                | K2  | 12.69 | 83.89  | 0.9898989 | -        | 0.881720(0.9358097 |
| Chmp5   | Q9D7S9 | 103 | DTK(*)TTVDAMK(*)               | K3  | 34.44 | 70.39  | 0.4685314 | 1.164556 | - 0.8165442        |
| Med8    | Q9D7W5 | 259 | TNIK(*)SASMHPYQR(*)            | K4  | 40.72 | 1000   | 1.1267605 | 0.810810 | 1.654545(1.1973723 |
| Med8    | Q9D7W5 | 255 | MPSGIK(*)TNIK(*)               | K6  | 19.68 | 63.97  | 1.5633802 | 1.027027 | 1.963636(1.5180146 |
| Ggct    | Q9D7X8 | 88  | MNK(*)SNISSLDEQEGVK(*)         | K3  | 56.13 | 144.36 | 1.0303030 | 0.535211 | 0.926315(0.83061   |
| Ppa1    | Q9D819 | 213 | NK(*)DFAVDIIK(*)               | K2  | 70.75 | 161.77 | 0.9484536 | 0.802469 | - 0.8754614        |
| Ppa1    | Q9D819 | 128 | HTGC(+57.02)C(+57.02)GDNDPIDV  | K19 | 67.04 | 1000   | 1.0721649 | 0.469135 | - 0.7706504        |
| Ppa1    | Q9D819 | 194 | YK(*)VPD GK(*)PENEF AFNAEFK(*) | K2  | 66.41 | 96.93  | -         | -        | 1.108695652        |
| Ppa1    | Q9D819 | 179 | LK(*)PGYLEATVDWFR(*)           | K2  | 25.29 | 1000   | -         | -        | 1.554347826        |
| Rpl37   | Q9D823 | 68  | HLK(*)IVYR(*)                  | K3  | 79.61 | 1000   | -         | -        | 1.272727273        |
| Rpl37   | Q9D823 | 31  | AYHLQK(*)STC(+57.02)GK(*)      | K6  | 67.47 | 95.62  | 1.0543478 | -        | 1.287878(1.1711133 |
| Rpl37   | Q9D823 | 14  | NK(*)THTLC(+57.02)R(*)         | K2  | 50.43 | 1000   | 0.6086956 | -        | 1.181818(0.8952569 |
| Fip1l1  | Q9D824 | 270 | ASSSVGK(*)WQDR(*)              | K7  | 71.85 | 1000   | 0.9767441 | 0.736111 | 0.943820(0.8855585 |
| Dnajb4  | Q9D832 | 3   | GK(*)DYYHILGIDK(*)             | K2  | 41.11 | 168.06 | -         | 0.612903 | -                  |
| Ppih    | Q9D868 | 137 | C(+57.02)DWLDGK(*)HVVFGK(*)    | K7  | 19.42 | 57.71  | -         | 1.306666 | 0.822222(1.0644444 |
| U2af1   | Q9D883 | 15  | DK(*)VN C(+57.02)SFYFK(*)      | K2  | 92.24 | 161.78 | 1.2020202 | 0.987341 | 0.956521(1.0486279 |
| Chmp4b  | Q9D8B3 | 14  | LFGAGGGK(*)AGK(*)              | K8  | 79.59 | 32.97  | 1.1829268 | 0.8625   | 1.144578(1.063335  |
| Rpl4    | Q9D8E6 | 106 | MFAPTK(*)TWR(*)                | K6  | 95.94 | 1000   | 0.9894736 | 0.913580 | 1.011363(0.9714725 |
| Rpl4    | Q9D8E6 | 274 | AASLK(*)SNYNLPMHK(*)           | K5  | 85.36 | 222.06 | 0.8736842 | 0.728395 | 0.852272(0.8181173 |
| Rpl4    | Q9D8E6 | 320 | K(*)NPLK(*)NLR(*)              | K5  | 81.99 | 82.63  | 0.8105263 | -        | -                  |
| Rpl4    | Q9D8E6 | 333 | LN PYAK(*)TMR(*)               | K6  | 81.59 | 1000   | -         | -        | 1.011363636        |
| Rpl4    | Q9D8E6 | 364 | LEAAATALATK(*)SEK(*)           | K11 | 81.16 | 40.63  | 0.8736842 | 0.728395 | 0.977272(0.859784  |
| Rpl4    | Q9D8E6 | 14  | PLISVYSEK(*)GESSGK(*)          | K9  | 75.79 | 37.35  | 0.9052631 | 0.802469 | 0.909090(0.8722744 |
| Rpl4    | Q9D8E6 | 140 | YAIC(+57.02)SALAASALPALVMSK(*) | K19 | 73.17 | 1000   | 1.0526315 | -        | 1.011363(1.0319976 |
| Rpl4    | Q9D8E6 | 364 | K(*)LEAAATALATK(*)SEK(*)       | K12 | 71.19 | 34.87  | 0.9263157 | 0.876543 | 0.965909(0.9229227 |
| Rpl4    | Q9D8E6 | 20  | GESSGK(*)NVTLP AVFK(*)         | K6  | 62.79 | 181.07 | 0.7894736 | 0.802469 | 0.988636(0.8601931 |
| Rpl4    | Q9D8E6 | 175 | LK(*)AWN DIK(*)                | K2  | 10.07 | 95.35  | 1.0210526 | -        | 0.977272(0.9991627 |
| Rpl7l1  | Q9D8M4 | 104 | IEGVSL LVK(*)STIMK(*)          | K9  | 41.39 | 87.95  | 0.8404255 | -        | 0.804123(0.8222746 |
| Phf10   | Q9D8M7 | 156 | EYPAK(*)HAEYSVILQEK(*)         | K5  | 24.13 | 55.94  | -         | -        | 1.52               |
| Eef1g   | Q9D8N0 | 434 | AVNQGK(*)IFK(*)                | K6  | 98.56 | 68.47  | 0.90625   | 0.902439 | 0.903225(0.9039716 |
| Eef1g   | Q9D8N0 | 147 | ILGLLDTHLK(*)TR(*)             | K10 | 97.96 | 1000   | 1.03125   | 0.926829 | 0.935483(0.964521  |
| Eef1g   | Q9D8N0 | 285 | AK(*)DPFAHL PK(*)STFVLDEFK(*)  | K10 | 77.81 | 109.88 | 0.9270833 | 0.402439 | 1.010752(0.7800917 |



|          |        |     |                                  |     |       |        |           |          |           |           |
|----------|--------|-----|----------------------------------|-----|-------|--------|-----------|----------|-----------|-----------|
| Eef1g    | Q9D8N0 | 277 | AK(*)DPFAHLPK(*)                 | K2  | 72.84 | 166.48 | 0.8125    | 0.878048 | 0.838709  | 0.8430862 |
| Eef1g    | Q9D8N0 | 285 | DPFAHLPK(*)STFVLDEFK(*)          | K8  | 66.67 | 178.84 | 1.0208333 | -        | 0.526881  | 0.7738575 |
| Eef1g    | Q9D8N0 | 285 | DPFAHLPK(*)STFVLDEFK(*)R(*)      | K8  | 49.56 | 112.57 | -         | 1.292682 | 0.935483  | 1.1140834 |
| Eef1g    | Q9D8N0 | 285 | AHLPK(*)STFVLDEFK(*)             | K5  | 38.58 | 123.34 | -         | 1.146341 | 0.870967  | 1.0086546 |
| Eef1g    | Q9D8N0 | 147 | GLLDTHLK(*)TR(*)                 | K8  | 36.74 | 1000   | 0.8333333 | -        | -         | -         |
| Eef1g    | Q9D8N0 | 285 | AHLPK(*)STFVLDEFK(*)R(*)         | K5  | 31.16 | 140.79 | 0.75      | -        | 1.408602  | 1.0793011 |
| Eef1g    | Q9D8N0 | 285 | AK(*)DPFAHLPK(*)STFVLDEFK(*)R(*) | K10 | 26.64 | 101.72 | 1.3958333 | 1.170731 | 0.989247  | 1.1852708 |
| Arfgap3  | Q9D8S3 | 23  | SVPTNK(*)VC(+57.02)FDC(+57.02)   | K6  | 56.11 | 66.64  | 0.89      | 0.506024 | -         | 0.698012  |
| Arfgap3  | Q9D8S3 | 118 | IK(*)TLATQATR(*)                 | K2  | 24.59 | 1000   | -         | 1.614457 | 0.840425  | 1.2274417 |
| Rexo2    | Q9D8S4 | 160 | HMPQFMK(*)HLHYR(*)               | K7  | 66.64 | 1000   | -         | -        | 0.7102803 | 0.74      |
| Rexo2    | Q9D8S4 | 153 | FLDK(*)HMPQFMK(*)                | K4  | 59.54 | 142.27 | 0.7377049 | 0.681415 | 0.925233  | 0.7814515 |
| Snx5     | Q9D8U8 | 385 | NLIEMSELEIK(*)HAR(*)             | K11 | 56.4  | 1000   | 0.8279569 | 0.731707 | 0.890109  | 0.8165914 |
| Snx5     | Q9D8U8 | 192 | SVVK(*)SADEVLFSGVK(*)            | K4  | 35.85 | 160.69 | -         | 1.512195 | 0.890109  | 1.2011525 |
| Snx5     | Q9D8U8 | 238 | SHK(*)NVADDYIHTAAC(+57.02)LHS    | K3  | 27.13 | 74.33  | -         | -        | 0.5054945 | 0.505     |
| Hm13     | Q9D8V0 | 61  | GK(*)SSSDMPETITSR(*)             | K2  | 86.74 | 1000   | 0.6373626 | 0.683544 | 0.930232  | 0.7503798 |
| Psm12    | Q9D8W5 | 405 | TIFAK(*)VDR(*)                   | K5  | 86.3  | 1000   | -         | 0.864197 | 0.989010  | 0.9266043 |
| Psm12    | Q9D8W5 | 147 | LTK(*)TLATIK(*)                  | K3  | 47.04 | 95.35  | 0.7938144 | -        | 0.945054  | 0.8694347 |
| Ccdc124  | Q9D8X2 | 116 | AK(*)SHLELPLEENLNR(*)            | K2  | 45.53 | 1000   | 1.1123595 | 0.861111 | 0.852631  | 0.9420341 |
| Ccdc124  | Q9D8X2 | 11  | FQGENSK(*)SAAAR(*)               | K7  | 44.02 | 1000   | 1.1235955 | 0.490740 | 0.842105  | 0.8188138 |
| Ccdc124  | Q9D8X2 | 44  | ELEDAYWK(*)DEDK(*)HVMR(*)        | K12 | 10.98 | 33.81  | -         | -        | 1.0105263 | 1.016     |
| Efh2     | Q9D8Y0 | 191 | GAK(*)NFFFEAK(*)                 | K3  | 8.82  | 51.01  | -         | -        | 2.0140845 | 0.7       |
| Ascc1    | Q9D8Z1 | 95  | TSINIPK(*)HGHEGEIVITGQHR(*)      | K7  | 55.95 | 1000   | 1.0083333 | -        | 0.735537  | 0.8719353 |
| Ebna1bp2 | Q9D903 | 157 | LQTK(*)QAAMEK(*)                 | K4  | 21.89 | 71.79  | 1.21875   | -        | 1.944444  | 1.5815972 |
|          | Q9D937 | 93  | AAMEVEAPSK(*)STR(*)              | K10 | 63.67 | 1000   | 1.2079207 | 0.693333 | 1.078651  | 0.9933019 |
| Echdc1   | Q9D9V3 | 123 | GLIIHGAK(*)NTFC(+57.02)SGSDLN/   | K8  | 12.47 | 67.58  | 1.2025316 | 0.703389 | 0.923913  | 0.9432782 |
| Dda1     | Q9D9Z5 | 13  | GLPVYNK(*)SNFSR(*)               | K7  | 43.46 | 1000   | 0.5795454 | 0.400862 | -         | 0.4902038 |
| Cir1     | Q9DA19 | 3   | GK(*)SFANFMC(+57.02)K(*)         | K2  | 86.43 | 180.8  | 0.8372093 | 0.376923 | 0.515923  | 0.5766853 |
| Exosc1   | Q9DAA6 | 96  | VHILYVGSTPLK(*)NAFR(*)           | K12 | 19.45 | 1000   | -         | -        | 1.1354166 | 0.7       |
| Tmem263  | Q9DAM7 | 68  | SLEVTK(*)TAVTTVPMSMGIGLVK(*)     | K6  | 17.66 | 73.26  | -         | -        | 1.0326086 | 0.96      |
| Dcps     | Q9DAR7 | 137 | TTVVYPATEK(*)HLQK(*)             | K10 | 70.4  | 38.26  | 0.9183673 | 1.014705 | 0.965116  | 0.9660632 |
| Dcps     | Q9DAR7 | 127 | HLSDIK(*)TTVVYPATEK(*)           | K6  | 16.45 | 88.74  | -         | 1.470588 | -         | -         |
| Gng12    | Q9DAS9 | 34  | VSK(*)ASADLMSYC(+57.02)EEHAR(*)  | K3  | 71.14 | 1000   | 1.0843373 | 0.819444 | 0.911764  | 0.9385155 |
| Gng12    | Q9DAS9 | 4   | S(+42.01)SK(*)TASTNSIAQAR(*)     | K3  | 28.93 | 1000   | -         | 1.430555 | 0.862745  | 1.1466503 |
| Prpf4    | Q9DAW6 | 215 | TSQMQLHK(*)SLR(*)                | K9  | 34.09 | 1000   | -         | -        | 0.8481012 | 0.66      |



|         |        |      |                                     |     |       |        |           |          |             |           |
|---------|--------|------|-------------------------------------|-----|-------|--------|-----------|----------|-------------|-----------|
| Cnn3    | Q9DAW9 | 17   | GPSYGLSAEVK(*)NK(*)                 | K11 | 86.27 | 36.05  | 0.9       | 0.740740 | 0.932584    | 0.857775  |
| Cnn3    | Q9DAW9 | 256  | VASQK(*)GMSVYGLGR(*)                | K5  | 85.43 | 1000   | 0.02      | 0.666666 | -           | 0.3433333 |
| Gon4l   | Q9DB00 | 2091 | HIC(+57.02)GK(*)AGSQSWLIESR(*)      | K5  | 10.57 | 1000   | -         | -        | -           |           |
| Napa    | Q9DB05 | 22   | VK(*)NSQSFSGFLFGSSK(*)              | K2  | 46.6  | 57.6   | 0.8350515 | -        | -           |           |
| Mrpl12  | Q9DB15 | 153  | EIK(*)NYVQGINLVQAK(*)               | K3  | 46.82 | 204.01 | 1.29      | 2.152542 | 0.571428    | 1.3379903 |
| Atp5po  | Q9DB20 | 90   | VK(*)SLNDITK(*)                     | K2  | 84.22 | 157.88 | 0.8469387 | 0.841463 | 0.903225    | 0.863876  |
| Atp5po  | Q9DB20 | 162  | TVLK(*)SFLSPNQILK(*)                | K4  | 83.55 | 206.72 | 0.8571428 | 0.731707 | 0.881720    | 0.8235235 |
| Atp5po  | Q9DB20 | 176  | LEIK(*)TDP SIMGGMIVR(*)             | K4  | 50.45 | 1000   | -         | -        | 0.784946237 |           |
| Mcts1   | Q9DB27 | 18   | ENVSN C(+57.02)IQLK(*)TSVIK(*)      | K10 | 68.03 | 55.6   | 0.7904761 | 0.794871 | 1.012195    | 0.8658477 |
| Chmp2a  | Q9DB34 | 94   | IQTLK(*)SNNSMAQAMK(*)               | K5  | 38.8  | 168.62 | -         | -        | 1.552083333 |           |
| Cyb5r1  | Q9DB73 | 81   | HILGLPVGK(*)HVYLSAR(*)              | K9  | 39.18 | 1000   | -         | -        | 0.684210526 |           |
| Uqcrc2  | Q9DB77 | 92   | LASSLTK(*)GASSFK(*)                 | K8  | 56.55 | 33.98  | 0.6435643 | -        | -           |           |
| Uqcrc2  | Q9DB77 | 183  | I IENLHDVAYK(*)NALANPLYC(+57.02)K11 | K11 | 56.27 | 1000   | -         | -        | 0.85106383  |           |
| Ngdn    | Q9DB96 | 74   | LMDLSHLILDK(*)ASGASLQGHPAVLI        | K11 | 59.47 | 1000   | -         | -        | 0.968421053 |           |
| Ngdn    | Q9DB96 | 115  | LVK(*)TAVTGSLSENDPLR(*)             | K3  | 42.77 | 1000   | 0.8875    | -        | 1.168421    | 1.0279605 |
| Gtf2h1  | Q9DBA9 | 239  | LNTGSK(*)DLFAEC(+57.02)AK(*)        | K6  | 24.14 | 135.81 | -         | -        | 1.676470588 |           |
| Prkar1a | Q9DBC7 | 134  | AIEK(*)NVLF SHLDDNER(*)             | K4  | 49.94 | 1000   | 0.8202247 | 0.712328 | 1.137931    | 0.8901615 |
| Prkar1a | Q9DBC7 | 70   | QIQ C(+57.02)LQK(*)TGIR(*)          | K7  | 46.05 | 1000   | 0.8314606 | 0.712328 | 1.034482    | 0.8594241 |
| Prkar1a | Q9DBC7 | 24   | EC(+57.02)ELYVQK(*)HNIQALLK(*)      | K8  | 42.17 | 21.68  | 1.4269662 | 0.712328 | 1.310344    | 1.14988   |
| Prkar1a | Q9DBC7 | 261  | VSILESLDK(*)WER(*)                  | K9  | 19.02 | 1000   | -         | -        | 1.24137931  |           |
| Aldh7a1 | Q9DBF1 | 124  | EK(*)IQLLGR(*)                      | K2  | 6.22  | 1000   | -         | -        | 1.173913043 |           |
| Plin3   | Q9DBG5 | 199  | VLVK(*)SEAWADNR(*)                  | K4  | 82.04 | 1000   | 0.8556701 | 0.972222 | 1.024390    | 0.9507609 |
| Plin3   | Q9DBG5 | 170  | TK(*)SAMTSGVQSVMGSR(*)              | K2  | 72.75 | 1000   | 0.9278350 | 0.972222 | 1.073170    | 0.991076  |
| Rpn2    | Q9DBG6 | 31   | LTPHYLTK(*)QDVER(*)                 | K9  | 73.41 | 1000   | 0.8191489 | 0.684210 | 0.858695    | 0.7873517 |
| Rpn2    | Q9DBG6 | 442  | LHNQK(*)TGQEVVFVAEPDNK(*)           | K5  | 30.2  | 153.62 | 1.2765957 | 1.157894 | 0.695652    | 1.0433809 |
| Rpn2    | Q9DBG6 | 392  | ISTEVGITNVDLSTVDK(*)DQSIAPK(*)      | K24 | 10.94 | 34.75  | -         | -        | 1.47826087  |           |
| Srpra   | Q9DBG7 | 219  | EEFIQK(*)HGK(*)                     | K6  | 51.62 | 57.45  | 0.5913978 | 0.597222 | 1.0625      | 0.7503734 |
| Srpra   | Q9DBG7 | 329  | GLVGSK(*)SLSR(*)                    | K6  | 35.86 | 1000   | 0.5806451 | -        | -           |           |
| Pgam1   | Q9DBJ1 | 113  | HGEAQVK(*)IWR(*)                    | K7  | 77.85 | 1000   | 0.8829787 | -        | 1.172413    | 1.0276963 |
| Pgam1   | Q9DBJ1 | 100  | HYGGLTGLNK(*)AETAAK(*)              | K10 | 64.86 | 139.02 | 1.0212765 | 0.986301 | 0.965517    | 0.9910317 |
| Akap8   | Q9DBR0 | 527  | SVLNNK(*)HIVK(*)                    | K6  | 79.87 | 55.36  | 0.7338709 | 0.655172 | 1.142857    | 0.8439668 |
| Akap8   | Q9DBR0 | 404  | SFEDEEIQK(*)HLQSK(*)                | K9  | 65.96 | 38.19  | -         | 0.551724 | 0.880952    | 0.7163383 |
| Akap8   | Q9DBR0 | 521  | TSLHVAK(*)SVLNNK(*)                 | K7  | 60.31 | 143.14 | -         | 0.804597 | 0.988095    | 0.8963465 |
| Akap8   | Q9DBR0 | 421  | FISTK(*)LPDK(*)                     | K5  | 51.33 | 49.79  | 0.75      | 0.597701 | 0.928571    | 0.7587575 |

|          |        |     |                                  |     |       |        |           |          |             |           |
|----------|--------|-----|----------------------------------|-----|-------|--------|-----------|----------|-------------|-----------|
| Xrn2     | Q9DBR1 | 368 | LVNIYK(*)NVVHK(*)                | K6  | 74.58 | 81.69  | 0.8494623 | 0.734177 | 0.872340    | 0.81866   |
| Xrn2     | Q9DBR1 | 189 | LNNDPGWK(*)NLTVILSDASAPGE        | K8  | 23.51 | 35.38  | -         | -        | 0.70212766  |           |
| Xrn2     | Q9DBR1 | 373 | NVVHK(*)TGGYLTESGYVNLQR(*)       | K5  | 22.12 | 1000   | 1.1505376 | 0.949367 | -           | 1.0499524 |
| Xrn2     | Q9DBR1 | 286 | GK(*)HDELADSLPC(+57.02)AEGEFIF   | K2  | 20.73 | 1000   | -         | -        | 0.914893617 |           |
| Armc8    | Q9DBR3 | 352 | R(*)LDHDLK(*)HAHELK(*)           | K7  | 14.36 | 1000   | -         | 1.819672 | -           |           |
| Apbb2    | Q9DBR4 | 242 | TGAK(*)TDC(+57.02)ALHR(*)        | K4  | 15.76 | 1000   | -         | -        | 1.370786517 |           |
| Ppp1r12a | Q9DBR7 | 197 | HAK(*)SGGTALHVAAAK(*)            | K3  | 36.34 | 223.58 | 1.4193548 | -        | 1           | 1.2096774 |
| Osbpl3   | Q9DBS9 | 128 | VK(*)SEELFDEWVSK(*)              | K2  | 13.36 | 223.6  | 1.5631067 | 1.5375   | 1.543209    | 1.5479389 |
| Ampd2    | Q9DBT5 | 28  | SLPGNAPC(+57.02)LK(*)HFPLDLR(*)  | K10 | 45.46 | 1000   | -         | -        | 0.702970297 |           |
| Ampd2    | Q9DBT5 | 348 | VDTHIHASSC(+57.02)MNQK(*)HLLF    | K14 | 28.85 | 1000   | -         | 0.873684 | 1.019801    | 0.9467431 |
| Ampd2    | Q9DBT5 | 732 | VK(*)SHWLGPNTYK(*)               | K2  | 21.61 | 148.29 | 1.3551401 | 1.273684 | 1.128712    | 1.2525124 |
| Riok3    | Q9DBU3 | 293 | VFK(*)TTLNEFK(*)                 | K3  | 54.73 | 83.89  | 0.6074766 | 0.571428 | -           | 0.5894526 |
| Riok3    | Q9DBU3 | 165 | DITTK(*)HDEVVC(+57.02)GR(*)      | K5  | 39.38 | 1000   | 0.9813084 | 0.495238 | 1           | 0.8255155 |
| Dnajc10  | Q9DC23 | 392 | TLLK(*)NEHIQVGR(*)               | K4  | 60.43 | 1000   | 1.0425531 | 0.738095 | 1           | 0.9268828 |
| Dnajc10  | Q9DC23 | 325 | EK(*)SSVLFLNSLDAK(*)             | K2  | 33.31 | 184.16 | -         | 1.452380 | 1           | 1.2261905 |
| Cdc40    | Q9DC48 | 551 | AHDK(*)VC(+57.02)IGAVWHPHETS     | K4  | 38.9  | 153.62 | -         | 0.913580 | 1           | 0.9567901 |
| Crot     | Q9DC50 | 489 | MLEAFK(*)HNK(*)                  | K7  | 38.14 | 56.34  | -         | -        | 1           |           |
| Gnai3    | Q9DC51 | 46  | LLLLGAGESGK(*)STIVK(*)           | K11 | 94.23 | 100.21 | 0.8155339 | 0.858974 | 0.964705    | 0.8797381 |
| Gnai3    | Q9DC51 | 180 | VK(*)TTGIVETHFTFK(*)             | K2  | 75.21 | 160.66 | 0.7864077 | 0.769230 | 0.941176    | 0.8322717 |
| Gnai3    | Q9DC51 | 92  | LK(*)IDFGESAR(*)                 | K2  | 59.26 | 1000   | 0.7864077 | 0.935897 | 1.082352    | 0.934886  |
| Pmpca    | Q9DC61 | 242 | EVLHSYLK(*)NYTTPDR(*)            | K8  | 67.44 | 1000   | -         | 0.573170 | 0.977777    | 0.7754743 |
| Mrps11   | Q9DCA2 | 149 | VVVK(*)GMGPGR(*)                 | K4  | 47.36 | 1000   | -         | -        | 1.46        |           |
| Brix1    | Q9DCA5 | 110 | LFVINEVC(+57.02)EMK(*)NC(+57.02) | K11 | 32.23 | 52.86  | 1.0879120 | -        | 1.690476    | 1.3891941 |
| Pycr3    | Q9DCC4 | 225 | MLQQEGK(*)HPAQLR(*)              | K7  | 67.57 | 1000   | 1.2738095 | 0.802469 | 0.96875     | 1.0150096 |
| Tomm20   | Q9DCC8 | 35  | SDPNFK(*)NR(*)                   | K6  | 38.74 | 1000   | 0.4031007 | -        | -           |           |
| Pgd      | Q9DCD0 | 38  | TVSK(*)VDDFLANEAK(*)             | K4  | 69.36 | 234.4  | 0.9670329 | 0.864197 | 1.147727    | 0.9929859 |
| Pgd      | Q9DCD0 | 308 | GPK(*)VVQLEGSK(*)                | K3  | 47.76 | 114.79 | 0.8021978 | 0.938271 | 0.795454    | 0.845308  |
| Pgd      | Q9DCD0 | 119 | AK(*)GILFVGSGVSGGEEGAR(*)        | K2  | 35.03 | 1000   | 1.1098901 | -        | -           |           |
| Xab2     | Q9DCD2 | 794 | AQSK(*)IFFVR(*)                  | K4  | 28.7  | 1000   | 1.2871287 | 0.934210 | 0.660550    | 0.9606299 |
| Pak1ip1  | Q9DCE5 | 161 | SAFIK(*)NIK(*)                   | K5  | 26.8  | 29.32  | -         | -        | 1.104651163 |           |
| Trmt112  | Q9DCG9 | 2   | MK(*)LLTHNLLSSHVR(*)             | K2  | 67.24 | 1000   | 0.7311827 | 0.855263 | 1.091954    | 0.8928    |
| Zfand6   | Q9DCH6 | 201 | YSDVHNC(+57.02)SYNYK(*)ADAAEK    | K12 | 13.04 | 28.13  | -         | -        | 1.441176471 |           |
| Ppp1r2   | Q9DCL8 | 18  | NK(*)TSAASPPVVPSAEQPR(*)         | K2  | 41.06 | 1000   | 0.9320388 | -        | 2.290322    | 1.6111807 |
| Ppp1r2   | Q9DCL8 | 18  | NK(*)TSAASPPVVPSAEQPR(*)PIVEEE   | K2  | 22.5  | 101.47 | -         | -        | 1.322580645 |           |

|         |        |     |                                 |     |       |        |           |           |           |           |
|---------|--------|-----|---------------------------------|-----|-------|--------|-----------|-----------|-----------|-----------|
| Paics   | Q9DCL9 | 261 | VELLLK(*)SDSQC(+57.02)R(*)      | K6  | 71.86 | 1000   | 0.8315789 | 0.714285  | 1.0777777 | 0.8745475 |
| Paics   | Q9DCL9 | 53  | K(*)NHLEGK(*)AAISNK(*)          | K7  | 51.11 | 85.43  | 0.9578947 | -         | -         |           |
| Paics   | Q9DCL9 | 53  | NHLEGK(*)AAISNK(*)              | K6  | 36.89 | 121.92 | 0.9789473 | 1.051948  | 0.8666666 | 0.965854  |
| Paics   | Q9DCL9 | 125 | FYPFK(*)VEMFFK(*)               | K5  | 11.01 | 37.35  | -         | 2.272727  | -         |           |
| Cyb5r3  | Q9DCN2 | 126 | FPAGGK(*)MSQYLENMK(*)           | K6  | 67.52 | 154.34 | 0.6464646 | 0.513157  | 0.9770114 | 0.7122113 |
| Mecr    | Q9DCS3 | 267 | LALNC(+57.02)VGGK(*)SSTELLR(*)  | K9  | 78.51 | 1000   | 0.7757009 | -         | 0.8645833 | 0.8201421 |
| Ndufb10 | Q9DCS9 | 134 | ELEQFTK(*)VTK(*)                | K7  | 28.12 | 55.63  | 0.9887640 | 0.695121  | 1.0481927 | 0.9106929 |
| Sdf2    | Q9DCT5 | 75  | GK(*)TATVC(+57.02)ER(*)         | K2  | 79.11 | 1000   | 1.0309278 | -         | 0.9382714 | 0.9845997 |
| Sdf2    | Q9DCT5 | 151 | FK(*)HSSTDVLLSVTGEQYGR(*)       | K2  | 44.13 | 1000   | -         | 1.304878  | 0.6913584 | 0.998118  |
| Etfb    | Q9DCW4 | 35  | SGVVTGDKV(*)HSMNPFK(+57.02)E    | K9  | 60.29 | 1000   | -         | -         | 1.1235955 | 0.6       |
| Etfb    | Q9DCW4 | 116 | EK(*)VDLLFLGK(*)                | K2  | 29.54 | 175.25 | 0.8829787 | 0.987179  | 1.1123595 | 0.9941726 |
| Atp5pd  | Q9DCX2 | 32  | AIGNALK(*)SWNETFHAR(*)          | K7  | 72.03 | 1000   | 0.9387755 | 0.829268  | 0.9120874 | 0.8933772 |
| Atp5pd  | Q9DCX2 | 32  | ALK(*)SWNETFHAR(*)              | K3  | 36.3  | 1000   | 1.2551020 | 0.939024  | 0.9450545 | 1.0463938 |
| Rab13   | Q9DD03 | 71  | FK(*)TITTAYR(*)                 | K2  | 2.32  | 1000   | -         | -         | 0.0235640 | 0.65      |
| Sacm1l  | Q9EP69 | 483 | YYK(*)NNFSDGFR(*)               | K3  | 44.06 | 1000   | -         | -         | 0.7765957 | 0.45      |
| Sacm1l  | Q9EP69 | 456 | QYAGTGALK(*)TDFTR(*)            | K9  | 12.48 | 1000   | 7.3373493 | -         | 18.021274 | 12.679313 |
| Sacm1l  | Q9EP69 | 435 | TYK(*)NAWADNANAC(+57.02)AK(*)   | K3  | 10.94 | 143.73 | 1.3493975 | 2.395061  | -         | 1.8722297 |
| Rai14   | Q9EP71 | 693 | AK(*)SEEALSEMK(*)               | K2  | 59.1  | 203.33 | 1.3516483 | 1.090909  | 0.8539325 | 1.09883   |
| Rai14   | Q9EP71 | 54  | HDSEGK(*)TAFHLAAAK(*)           | K6  | 29.53 | 99.51  | 1.6483516 | 1.428571  | 1.3033707 | 1.460098  |
| Rai14   | Q9EP71 | 109 | LLQYK(*)SPAENIDNSGK(*)          | K5  | 24.41 | 77.35  | 0.8241758 | 1.194805  | 1.4606747 | 1.1598851 |
| Emc7    | Q9EP72 | 126 | YVNYIK(*)TSEVVR(*)              | K6  | 26.92 | 1000   | -         | -         | 1.3902439 | 0.2       |
| Wdr4    | Q9EP82 | 244 | QLQC(+57.02)C(+57.02)DLAQLQEP   | K20 | 65.74 | 1000   | 1.0322580 | 0.684782  | 0.6258997 | 0.78098   |
| Senp3   | Q9EP97 | 440 | WTK(*)NVDIFNK(*)                | K3  | 52.66 | 111.09 | 0.6086956 | 0.6666666 | 0.6036036 | 0.626322  |
| Senp3   | Q9EP97 | 41  | LK(*)SGGGFGPDGSGTTVPTR(*)       | K2  | 22.02 | 1000   | 0.6869565 | 1.372549  | -         | 1.0297528 |
| Parva   | Q9EPC1 | 274 | TLITFVNK(*)HLNK(*)              | K8  | 80.6  | 97.69  | 0.9714285 | 0.921052  | 0.8571428 | 0.9165414 |
| Parva   | Q9EPC1 | 355 | PR(*)PEDIVNC(+57.02)DLK(*)STLR( | K12 | 18.73 | 1000   | 0.9238095 | -         | -         |           |
| Arfgap1 | Q9EPJ9 | 285 | VQGVGSK(*)GWR(*)                | K7  | 86.6  | 1000   | 0.7802197 | 0.902777  | 0.8297877 | 0.8375949 |
| Arfgap1 | Q9EPJ9 | 114 | DK(*)VATLAEGK(*)                | K2  | 38.02 | 115.01 | -         | -         | 0.7553191 | 0.49      |
| Xpo7    | Q9EPK7 | 338 | LK(*)SNYQLGELVK(*)              | K2  | 71.91 | 213.35 | 0.7111111 | 0.710526  | 0.9204545 | 0.7806973 |
| Ipo7    | Q9EPL8 | 119 | VQLTTC(+57.02)IHIIHK(*)HDYPSR(  | K12 | 95.52 | 1000   | 0.9139784 | 0.817073  | 0.9255315 | 0.8855279 |
| Ipo7    | Q9EPL8 | 489 | FK(*)SDQNLQTALELTR(*)           | K2  | 68.13 | 1000   | 1.1612903 | 0.682926  | 0.5957444 | 0.8133206 |
| Upf1    | Q9EPU0 | 486 | FTAQGLPDLNHSQVYAVK(*)TVLQR(     | K18 | 57.25 | 1000   | 0.8695652 | -         | 1.0526315 | 0.9610984 |
| Upf1    | Q9EPU0 | 840 | EK(*)DFIILSC(+57.02)VR(*)       | K2  | 30.86 | 1000   | 1.6630434 | -         | -         |           |
| Upf1    | Q9EPU0 | 434 | MQSALK(*)TFAVDETSVSGYIYHK(*)    | K6  | 14.42 | 34.72  | -         | -         | 1.0526315 | 0.79      |

|          |        |     |                                 |     |       |        |           |          |           |           |
|----------|--------|-----|---------------------------------|-----|-------|--------|-----------|----------|-----------|-----------|
| Cpsf1    | Q9EPU4 | 807 | LVFLVK(*)NFPVGQR(*)             | K6  | 51.58 | 1000   | 0.7941176 | -        | 0.9666666 | 0.8803922 |
| Hsd17b11 | Q9EQ06 | 282 | FLQVLK(*)HR(*)                  | K6  | 73.9  | 1000   | 0.8611111 | 0.75     | 0.9270833 | 0.8460648 |
| Pold3    | Q9EQ28 | 386 | SK(*)TFVDEEGC(+57.02)IVTEK(*)   | K2  | 9.55  | 126.28 | -         | -        | 5.1034482 | 76        |
| Pes1     | Q9EQ61 | 98  | AYGK(*)SEWNAVER(*)              | K4  | 82.64 | 1000   | 1.0561797 | 0.698795 | 0.8229166 | 0.8592972 |
| Pes1     | Q9EQ61 | 152 | TGK(*)C(+57.02)HVQTIQLC(+57.02) | K3  | 79.05 | 1000   | 1         | 0.855421 | 0.9166666 | 0.9240295 |
| Pes1     | Q9EQ61 | 49  | GIYPHEPK(*)HK(*)                | K8  | 54.13 | 33.18  | 1         | 0.518072 | 0.7708333 | 0.7629685 |
| Nif3l1   | Q9EQ80 | 105 | HITWK(*)TWK(*)                  | K5  | 63.44 | 34.94  | -         | -        | 1.2073170 | 73        |
| Nif3l1   | Q9EQ80 | 100 | PMK(*)HITWK(*)                  | K3  | 53.63 | 127.18 | 0.9897959 | 1.012820 | 1.1463414 | 1.0496526 |
| Nif3l1   | Q9EQ80 | 180 | SQDLDK(*)VMSTLR(*)              | K6  | 42.43 | 1000   | -         | 0.679487 | -         |           |
| Nif3l1   | Q9EQ80 | 233 | QLYQK(*)TEILSLEK(*)             | K5  | 12.74 | 97.31  | -         | 1        | -         |           |
| Scyl1    | Q9EQC5 | 410 | EQTVK(*)SMLLAPK(*)              | K5  | 41.07 | 123.53 | 0.9887640 | 0.519480 | 1.3367346 | 0.9483264 |
| Cert     | Q9EQG9 | 48  | WVVLK(*)NNTLSYYK(*)             | K5  | 9.84  | 36.2   | -         | 1.674418 | -         |           |
| Vps35    | Q9EQH3 | 44  | LMDALK(*)HASNMLGELR(*)          | K6  | 67.3  | 1000   | 0.7894736 | -        | 1.0769230 | 0.9331984 |
| Vps35    | Q9EQH3 | 419 | LK(*)HFHPLFEYFDYESR(*)          | K2  | 55.16 | 1000   | 1.1263157 | -        | 0.9670325 | 1.0466744 |
| Vps35    | Q9EQH3 | 768 | IR(*)EDLPNLESSEETEIQINK(*)HFHNT | K19 | 45    | 1000   | 0.8315789 | 1.298701 | 1.0879120 | 1.0727308 |
| Vps35    | Q9EQH3 | 296 | VK(*)NIIIALIDR(*)               | K2  | 40.25 | 1000   | -         | -        | 0.8901098 | 9         |
| Vps35    | Q9EQH3 | 639 | MK(*)C(+57.02)FSEENHEPLR(*)     | K2  | 20.61 | 1000   | 2.0315789 | -        | -         |           |
| Vps35    | Q9EQH3 | 38  | NK(*)LMDALK(*)                  | K2  | 12.56 | 102.87 | 0.9473684 | -        | -         |           |
| Vps35    | Q9EQH3 | 768 | EDLPNLESSEETEIQINK(*)HFHNTLEHL  | K17 | 11.04 | 1000   | -         | -        | 1.2307692 | 31        |
| Mvp      | Q9EQK5 | 33  | VEVGPK(*)TYIR(*)                | K6  | 35.51 | 1000   | 1.3061224 | 0.828571 | 0.7802190 | 0.9716379 |
| Mvp      | Q9EQK5 | 444 | GTAK(*)VLQPSAAR(*)              | K4  | 10.23 | 1000   | -         | -        | 0.8241758 | 24        |
| Set      | Q9EQU5 | 131 | VEVTEFEDIK(*)SGYR(*)            | K10 | 71.04 | 1000   | -         | 0.952941 | 0.7979797 | 0.8754605 |
| Set      | Q9EQU5 | 166 | EFHLNESGDPSSK(*)STEIK(*)        | K13 | 68.57 | 119.54 | 0.9285714 | 0.776470 | 0.8989898 | 0.8680106 |
| Set      | Q9EQU5 | 27  | LEDK(*)SASPGLPK(*)              | K4  | 58.12 | 131.72 | 0.7755102 | 0.682352 | 0.8080808 | 0.7553147 |
| Set      | Q9EQU5 | 67  | LNEQASEEILK(*)VEQK(*)           | K11 | 32.16 | 77.13  | 1.2244897 | 1.258823 | 0.8585858 | 1.1139664 |
| Aif1l    | Q9EQX4 | 83  | LGVPK(*)THLEMK(*)               | K5  | 44.4  | 77.93  | 0.5855855 | 1.030303 | 0.2425145 | 0.6194679 |
| Stx12    | Q9ER00 | 44  | IK(*)NLMSQLGTK(*)               | K2  | 7.85  | 106.84 | -         | -        | 0.9438202 | 25        |
| Stx12    | Q9ER00 | 53  | NLMSQLGTK(*)QDSSK(*)            | K9  | 6.73  | 47.14  | -         | -        | 0.5955056 | 18        |
| Cars     | Q9ER72 | 495 | SLK(*)NFITIK(*)                 | K3  | 74.58 | 102.92 | 0.7714285 | 0.643678 | 0.8673465 | 0.7608179 |
| Cars     | Q9ER72 | 575 | WEAELEVELNK(*)NFGYK(*)          | K10 | 29.02 | 33.54  | -         | -        | 0.7346938 | 78        |
| Dap3     | Q9ER88 | 182 | FDQPLEASTWLK(*)NFK(*)           | K12 | 46.57 | 24.24  | -         | -        | 0.8139534 | 88        |
| Dap3     | Q9ER88 | 127 | GTGK(*)TSLC(+57.02)HAVHFC(+57   | K4  | 27.75 | 1000   | -         | -        | 0.8953488 | 37        |
| Tfip11   | Q9ERA6 | 171 | GLGK(*)NAQGIINPIEAK(*)          | K4  | 49.75 | 220.17 | 1.52      | 1.21875  | -         | 1.369375  |
| Tfip11   | Q9ERA6 | 188 | GK(*)GAVGAYGSER(*)              | K2  | 19.32 | 1000   | 1.2       | 0.953125 | 1.0125    | 1.0552083 |

|         |        |      |                                 |     |       |        |           |          |                     |
|---------|--------|------|---------------------------------|-----|-------|--------|-----------|----------|---------------------|
| Lima1   | Q9ERG0 | 466  | DLWASK(*)SDNEETLGR(*)           | K6  | 60.74 | 1000   | -         | -        | 1.157303371         |
| Lima1   | Q9ERG0 | 210  | GEHNQTK(*)SLWTQSR(*)            | K7  | 59.05 | 1000   | 1.0192307 | 0.958904 | 1.1011231:1.0264195 |
| Lima1   | Q9ERG0 | 292  | QSSPASYTNELK(*)TSESK(*)         | K12 | 34.23 | 45.16  | -         | -        | 0.685393258         |
| Lima1   | Q9ERG0 | 437  | IYC(+57.02)K(*)PHFNQLFK(*)      | K4  | 32.18 | 86.34  | 0.75      | -        | 1.730337(1.2401685  |
| Lima1   | Q9ERG0 | 393  | ESC(+57.02)VEC(+57.02)QK(*)TVYP | K8  | 19.67 | 1000   | 1.4615384 | -        | 1.213483:1.3375108  |
| Strn3   | Q9ERG2 | 710  | FFDNK(*)TGK(*)                  | K5  | 25.48 | 28.96  | -         | -        | 1.2                 |
| Strn3   | Q9ERG2 | 597  | SGIK(*)NQLLSC(+57.02)SADGTIR(*) | K4  | 24.21 | 1000   | -         | -        | 0.788888889         |
| Cse1l   | Q9ERK4 | 67   | VC(+57.02)ASVTFK(*)NYIK(*)      | K8  | 78.3  | 35.82  | 0.84375   | 0.8375   | 0.922222:0.8678241  |
| Cse1l   | Q9ERK4 | 427  | HK(*)DAAIYLVTSLASK(*)           | K2  | 55.07 | 216.84 | 0.9375    | 0.75     | 0.9888888:0.8921296 |
| Cse1l   | Q9ERK4 | 165  | HEFK(*)SNELWTEIK(*)             | K4  | 49.95 | 165.61 | 0.8333333 | 0.7375   | 0.8888888:0.8199074 |
| Cse1l   | Q9ERK4 | 425  | NPSVNWK(*)HK(*)                 | K7  | 40.24 | 26.31  | -         | -        | 0.977777778         |
| Ranbp2  | Q9ERU9 | 2018 | DFK(*)TFLTNDQVK(*)              | K3  | 50.06 | 95.39  | 0.8260869 | -        | 0.989130:0.9076087  |
| Ranbp2  | Q9ERU9 | 106  | IAELLC(+57.02)K(*)NDVTDGR(*)    | K7  | 48.01 | 1000   | 0.9239130 | -        | -                   |
| Ranbp2  | Q9ERU9 | 1510 | EWHC(+57.02)SLC(+57.02)SVK(*)N  | K10 | 47.34 | 81.81  | 0.8586956 | 0.96     | 1.054347:0.9576812  |
| Ranbp2  | Q9ERU9 | 1133 | SDDMFADFHPGK(*)SVFTTAASELAN     | K12 | 44.03 | 232.04 | 1.2065217 | -        | 0.989130:1.0978261  |
| Ranbp2  | Q9ERU9 | 365  | GK(*)QDFLK(*)                   | K2  | 39.59 | 107.29 | -         | -        | 1.130434783         |
| Ranbp2  | Q9ERU9 | 776  | SADSELK(*)HSTPSPTK(*)           | K7  | 36.02 | 78.75  | -         | -        | 1.684782609         |
| Ranbp2  | Q9ERU9 | 2938 | GFGFK(*)NSIFHR(*)               | K5  | 31.22 | 1000   | 1.7934782 | -        | 1.336956:1.5652174  |
| Ranbp2  | Q9ERU9 | 3014 | K(*)AEHLDFK(*)HVVFGFVK(*)       | K8  | 10.05 | 26.08  | 3.1304347 | -        | 2.967391:3.048913   |
| Arhgef7 | Q9ES28 | 514  | LPTTGMTITK(*)LEDSENHR(*)        | K10 | 36.37 | 1000   | 1.1724137 | -        | -                   |
| Arhgef7 | Q9ES28 | 704  | VIEAYC(+57.02)TSAK(*)TR(*)      | K10 | 13.71 | 1000   | -         | -        | 1.396226415         |
| C1qtnf3 | Q9ES30 | 200  | GK(*)SDTSSNHAVLK(*)             | K2  | 0.7   | 215.31 | -         | -        | -                   |
| Parvb   | Q9ES46 | 267  | SLITFVNK(*)HLNK(*)              | K8  | 45    | 77.51  | 1.5060240 | 1.802325 | 1.041322:1.4498907  |
| Nek7    | Q9ES74 | 74   | VQIFDLMDAK(*)AR(*)              | K10 | 12.95 | 1000   | 0.7159090 | -        | 0.694117(0.7050134  |
| Rtn3    | Q9ES97 | 829  | VYK(*)SVIQAVQK(*)               | K3  | 91.89 | 216.51 | 0.7425742 | 0.841463 | 0.793814:0.7926174  |
| Rtn3    | Q9ES97 | 930  | YK(*)TQIDHYVGIAR(*)             | K2  | 83.08 | 1000   | 0.8514851 | 0.987804 | 0.907216:0.9155022  |
| Rtn3    | Q9ES97 | 837  | SVIQAVQK(*)SEEGHPFK(*)          | K8  | 39.11 | 58.11  | 1.2574257 | 1.243902 | 0.773195:1.091508   |
| Xpo4    | Q9ESJ0 | 647  | WAK(*)TYLLVDEK(*)               | K3  | 8.66  | 66.68  | -         | 1.048780 | -                   |
| Psmg2   | Q9EST4 | 188  | IPGGGITK(*)TLYDESC(+57.02)SK(*) | K8  | 72.31 | 130.84 | 0.7087378 | 0.489583 | 0.689655:0.6293255  |
| Psmg2   | Q9EST4 | 149  | YLLTPC(+57.02)LQK(*)SVQNK(*)    | K9  | 19.99 | 46.62  | 0.8737864 | 1.104166 | -                   |
| Brd4    | Q9ESU6 | 1233 | IK(*)NMGSWASLVQK(*)             | K2  | 87.42 | 245.03 | 0.9655172 | 0.21     | 1                   |
| Brd4    | Q9ESU6 | 1254 | HPTTPSSTAK(*)SSSDSEHFR(*)       | K10 | 80.88 | 1000   | 1.1954022 | 0.29     | 1.013157:0.8328534  |
| Brd4    | Q9ESU6 | 76   | TLWK(*)HQFAWPFQPPVDAVK(*)       | K4  | 36.44 | 132.44 | -         | -        | 1.026315789         |
| Brd4    | Q9ESU6 | 1053 | HHK(*)SDPYSAGHLR(*)             | K3  | 19.96 | 1000   | -         | -        | 1.263157895         |



|         |        |      |                                |     |       |        |           |          |             |           |
|---------|--------|------|--------------------------------|-----|-------|--------|-----------|----------|-------------|-----------|
| Brd4    | Q9ESU6 | 72   | VVLK(*)TLWK(*)                 | K4  | 18.67 | 97.69  | 1.2183908 | 0.36     | 1.210526    | 0.929639  |
| Ddx24   | Q9ESV0 | 143  | VGGAK(*)SESQAAPR(*)            | K5  | 48.5  | 1000   | 1.2072072 | 0.770270 | -           | 0.9887387 |
| Dkc1    | Q9ESX5 | 144  | LVK(*)SQQSAGK(*)               | K3  | 65.31 | 120.29 | -         | -        | 0.97752809  |           |
| Gtf2i   | Q9ESZ8 | 130  | ALGK(*)STVVPVPYEK(*)           | K4  | 50.82 | 147.65 | 0.7916666 | 1.012820 | -           | 0.9022436 |
| Tm9sf3  | Q9ET30 | 97   | FK(*)DDVMPGTYC(+57.02)EIDLK(   | K2  | 42.59 | 172.8  | 1.1630434 | -        | 1.032608    | 1.0978261 |
| Palld   | Q9ET54 | 923  | FK(*)EDLLNNGQPR(*)             | K2  | 34.85 | 1000   | 5.8636363 | 6.957142 | 2.783132    | 5.2013039 |
| Palld   | Q9ET54 | 1069 | QISPK(*)SDHYTIQR(*)            | K5  | 31.05 | 1000   | 1.0909090 | 1.442857 | 1.349397    | 1.2943879 |
| Palld   | Q9ET54 | 1056 | PK(*)IYWFK(*)                  | K2  | 25.49 | 142.99 | 0.875     | -        | 0.963855    | 0.9194277 |
| Elf2    | Q9JHC9 | 341  | GGK(*)NSSPLNC(+57.02)SR(*)     | K3  | 16.07 | 1000   | 2.0555555 | -        | -           |           |
| Copz2   | Q9JHH9 | 74   | EQMVFEK(*)NVFNK(*)             | K7  | 50.19 | 29.96  | -         | 0.476190 | -           |           |
| Ivd     | Q9JHI5 | 76   | AQEIDQTNDFK(*)NLR(*)           | K11 | 47.41 | 1000   | 0.6777777 | -        | 1           | 0.8388889 |
| Exosc9  | Q9JHI7 | 227  | VMDGLLVIAMNK(*)HR(*)           | K12 | 13.88 | 1000   | 1.7722772 | -        | -           |           |
| Tmod3   | Q9JHJ0 | 230  | TLEANTHVK(*)HFSLAATR(*)        | K9  | 84.8  | 1000   | 1.1397849 | 1.082191 | 0.988505    | 1.0701608 |
| Tmod3   | Q9JHJ0 | 337  | AANAITK(*)NNDLVR(*)            | K7  | 71.7  | 1000   | 1.0107526 | 0.972602 | 0.931034    | 0.9714633 |
| Tmod3   | Q9JHJ0 | 221  | DFAK(*)TLEANTHVK(*)            | K4  | 42.92 | 143.22 | -         | -        | 1.011494253 |           |
| Tmod3   | Q9JHJ0 | 58   | NQTSK(*)SATGPFDR(*)            | K5  | 38.57 | 1000   | 0.6881720 | 1.712328 | 0.908045    | 1.1028489 |
| Poglut2 | Q9JHP7 | 361  | HISFFDFFK(*)HK(*)              | K9  | 53.29 | 22.85  | 0.9677419 | 0.8625   | 1.070588    | 0.9669434 |
| Poglut2 | Q9JHP7 | 202  | VYIK(*)JHGEHVGFR(*)            | K4  | 39.57 | 1000   | -         | 1.175    | 1.152941    | 1.1639706 |
| Poglut2 | Q9JHP7 | 115  | IEVK(*)HHGQHVAESPYVLR(*)       | K4  | 20.54 | 1000   | -         | 1.65     | 1.552941    | 1.6014706 |
| Poglut2 | Q9JHP7 | 412  | HYIPVK(*)SNLSDLLEK(*)          | K6  | 11.34 | 54.49  | -         | -        | 2.494117647 |           |
| Lztfl1  | Q9JHQ5 | 244  | SLEENLAAAK(*)HDLRL(*)          | K10 | 52.68 | 1000   | -         | -        | 0.62601626  |           |
| Ide     | Q9JHR7 | 483  | VAIVSK(*)SFEGK(*)              | K6  | 68.62 | 95.62  | 0.7956989 | 0.897435 | 1.760869    | 1.1513348 |
| Ide     | Q9JHR7 | 192  | EVNAVDSEHEK(*)NVMNDAWR(*)      | K11 | 66.49 | 1000   | -         | -        | 1.02173913  |           |
| Ide     | Q9JHR7 | 436  | GYTSK(*)IAGK(*)                | K5  | 34.68 | 23.44  | -         | 0.769230 | -           |           |
| Ide     | Q9JHR7 | 558  | DTAMSK(*)LWFK(*)               | K6  | 19.7  | 46.21  | -         | 1.256410 | -           |           |
| Cwc15   | Q9JHS9 | 18   | GK(*)GEGDLSQLSK(*)             | K2  | 54.8  | 235.31 | 0.7529411 | 0.560747 | 0.509090    | 0.6075932 |
| Cwc15   | Q9JHS9 | 195  | WDDDDVVK(*)NC(+57.02)AK(*)     | K8  | 20.77 | 38.03  | -         | 0.579439 | 0.845454    | 0.7124469 |
| Dync1h1 | Q9JHU4 | 954  | IK(*)NVVHELRL(*)               | K2  | 86.61 | 1000   | 0.84375   | 0.911392 | 0.912087    | 0.8890768 |
| Dync1h1 | Q9JHU4 | 622  | FK(*)VQYPQSQC(+57.02)K(*)      | K2  | 82.58 | 158.08 | 0.9479166 | 0.784810 | 0.846153    | 0.8596269 |
| Dync1h1 | Q9JHU4 | 574  | DQLGTAK(*)NANEMFR(*)           | K7  | 67.72 | 1000   | 0.8125    | 0.835443 | 0.934065    | 0.8606697 |
| Dync1h1 | Q9JHU4 | 1990 | EHSNPNYDK(*)TSAPITC(+57.02)ELL | K9  | 62.83 | 186.68 | 0.8229166 | 0.721518 | 0.846153    | 0.7968632 |
| Dync1h1 | Q9JHU4 | 3230 | SQELEVK(*)NAAANDK(*)           | K7  | 62.36 | 136.94 | -         | -        | 0.879120879 |           |
| Dync1h1 | Q9JHU4 | 3223 | IK(*)SQELEVK(*)                | K2  | 59.59 | 186.64 | 0.8229166 | 1.025316 | 0.945054    | 0.931096  |
| Dync1h1 | Q9JHU4 | 3469 | ADLAAVEAK(*)VNR(*)             | K9  | 57.74 | 1000   | 0.7916666 | 0.848101 | 0.934065    | 0.8579446 |



|         |        |      |                                  |     |       |        |           |          |           |             |
|---------|--------|------|----------------------------------|-----|-------|--------|-----------|----------|-----------|-------------|
| Dync1h1 | Q9JHU4 | 1494 | GWDDL FNK(*)VK(*)                | K8  | 55.97 | 21.68  | 1.3020833 | -        | 1         | 1.1510417   |
| Dync1h1 | Q9JHU4 | 2092 | ALK(*)SVLVSAGNVK(*)              | K3  | 53.68 | 145.28 | 1.2916666 | -        | 0.8791208 | 1.0853938   |
| Dync1h1 | Q9JHU4 | 3891 | LK(*)GTVGEPTYDAEFQHFLR(*)        | K2  | 48.49 | 1000   | -         | -        | 0.9780219 | 0.978021978 |
| Dync1h1 | Q9JHU4 | 870  | SLETC(+57.02)MYDHK(*)TFSEILNR(*) | K10 | 41.82 | 1000   | -         | -        | 0.9670329 | 0.967032967 |
| Dync1h1 | Q9JHU4 | 3489 | WEK(*)TSETFK(*)                  | K3  | 41.61 | 58.16  | 0.78125   | 0.455696 | 0.5934068 | 0.6101176   |
| Dync1h1 | Q9JHU4 | 3755 | SLLQALNEVK(*)GR(*)               | K10 | 39.54 | 1000   | -         | -        | 0.4395604 | 0.43956044  |
| Dync1h1 | Q9JHU4 | 1412 | HWK(*)QLMK(*)                    | K3  | 37.41 | 109.97 | -         | -        | 1.2527472 | 1.252747253 |
| Dync1h1 | Q9JHU4 | 1402 | INMLVIELK(*)SEALK(*)             | K9  | 36.27 | 45.16  | -         | -        | 1         | 1           |
| Dync1h1 | Q9JHU4 | 1113 | VQSK(*)VNLK(*)                   | K4  | 27.38 | 59.3   | -         | -        | 1.0879120 | 1.087912088 |
| Dync1h1 | Q9JHU4 | 669  | R(*)VEDVLGK(*)GWENHVEGQK(*)      | K8  | 15.27 | 57.1   | 1.28125   | 1.037974 | -         | 1.1596123   |
| Dync1h1 | Q9JHU4 | 1369 | QNLDGLLNQLK(*)NFPAR(*)           | K11 | 11.7  | 1000   | -         | -        | 1.1978021 | 1.197802198 |
| Dync1h1 | Q9JHU4 | 1827 | SK(*)IDNAK(*)                    | K2  | 10.83 | 95.62  | -         | -        | 1.1648351 | 1.164835165 |
| Dync1h1 | Q9JHU4 | 2941 | QPQGHLLLIGVSGAGK(*)TTLRSR(*)     | K16 | 9.85  | 1000   | 1.375     | -        | -         | -           |
| Nit2    | Q9JHW2 | 109  | LYNTC(+57.02)SVFGPDGSLLVK(*)H    | K17 | 40.49 | 1000   | 0.8522727 | 0.824324 | 0.4320987 | 0.7028986   |
| Eefsec  | Q9JHW4 | 254  | VK(*)SMQMFHTPVTSAMQGDR(*)        | K2  | 60.31 | 1000   | 0.6631578 | 0.861111 | 0.9891304 | 0.8377998   |
| Ankh    | Q9JHZ2 | 127  | LHHVDESVGSK(*)TR(*)              | K11 | 51.48 | 1000   | -         | -        | 0.9222222 | 0.922222222 |
| Utp3    | Q9JI13 | 140  | LYYD TDYGSK(*)SR(*)              | K10 | 45.36 | 1000   | -         | -        | 1.1505376 | 1.150537634 |
| Abcb10  | Q9JI39 | 661  | LSTIK(*)NANFVAVL DHGK(*)         | K5  | 48.14 | 115.9  | -         | -        | 1.3442622 | 1.344262295 |
| Prmt1   | Q9JIF0 | 134  | ANK(*)LDHVVTI IK(*)              | K3  | 84.75 | 246.46 | 0.9793814 | 0.851851 | 0.8191488 | 0.8834607   |
| Copb1   | Q9JIF7 | 932  | AK(*)SQGMALSLGDK(*)              | K2  | 73.91 | 175.94 | 0.4680851 | -        | 0.3820224 | 0.4250538   |
| Copb1   | Q9JIF7 | 366  | EVIK(*)TNNVSEHEDTDK(*)           | K4  | 7.74  | 69.38  | -         | -        | 1.5955056 | 1.595505618 |
| Ccdc22  | Q9JIG7 | 423  | LIHLASQWEK(*)HR(*)               | K10 | 56.57 | 1000   | 1.4301075 | 0.848837 | 0.8762888 | 1.0517445   |
| Praf2   | Q9JIG8 | 152  | IENK(*)IESIGLK(*)                | K4  | 65.54 | 157.88 | 0.8152173 | 0.845070 | 1.0526318 | 0.9043065   |
| Nup50   | Q9JIH2 | 448  | VK(*)TSEDADELHK(*)               | K2  | 64.23 | 226.64 | -         | 0.714285 | 0.8915667 | 0.802926    |
| Dazap1  | Q9JII5 | 194  | DSK(*)NQAPGQPGASQWGSR(*)         | K3  | 19.22 | 1000   | 1.4444444 | -        | 1.1333333 | 1.2888889   |
| Akr1a1  | Q9JII6 | 127  | GDNPFPK(*)NADGTVR(*)             | K7  | 90.5  | 1000   | 0.7959183 | 1.119047 | 0.8571428 | 0.9240363   |
| Akr1a1  | Q9JII6 | 240  | HPDEPV LLEEPVVLALAEK(*)HGR(*)    | K19 | 78.64 | 1000   | 1.0408163 | 0.726190 | 0.9230768 | 0.8966946   |
| Akr1a1  | Q9JII6 | 263  | VIC(+57.02)IPK(*)SINPSR(*)       | K6  | 74.23 | 1000   | 0.8571428 | 0.880952 | 1         | 0.9126984   |
| Akr1a1  | Q9JII6 | 23   | MPLIGLGTWK(*)SEPGQVK(*)          | K10 | 65.59 | 83.89  | 0.9285714 | 0.75     | 0.8571428 | 0.8452381   |
| Akr1a1  | Q9JII6 | 85   | LWNTK(*)HHPEDVEPALR(*)           | K5  | 54.11 | 1000   | 1.2346938 | 0.845238 | 1.1978027 | 1.0925781   |
| Akr1a1  | Q9JII6 | 34   | AAIK(*)HALSAGYR(*)               | K4  | 51.23 | 1000   | 1.0816326 | 0.821428 | 0.9890108 | 0.9640241   |
| Akr1a1  | Q9JII6 | 263  | K(*)VIC(+57.02)IPK(*)SINPSR(*)   | K7  | 26.21 | 76.27  | 0.7040816 | 0.809523 | 1.1208797 | 0.8781615   |
| Ddx21   | Q9JIK5 | 39   | SK(*)TEEATEGMEEAVSSK(*)          | K2  | 95.57 | 337.17 | 0.9795918 | 0.901234 | 0.9591838 | 0.94667     |
| Ddx21   | Q9JIK5 | 287  | GVNFLFPIQAK(*)TFHHVYSGK(*)       | K11 | 68.34 | 38.72  | 0.9081632 | 0.753086 | 0.8877557 | 0.8496683   |

|         |        |      |                                  |     |       |        |           |          |          |           |
|---------|--------|------|----------------------------------|-----|-------|--------|-----------|----------|----------|-----------|
| Ddx21   | Q9JIK5 | 463  | YMK(*)STYEQVDLIGK(*)             | K3  | 66.4  | 232.86 | -         | 0.913580 | 0.918367 | 0.9159738 |
| Ddx21   | Q9JIK5 | 296  | TFHHVYSGK(*)DLIAQAR(*)           | K9  | 53.05 | 1000   | -         | 0.839506 | -        | -         |
| Ddx21   | Q9JIK5 | 308  | TGTGK(*)TFSFAIPLIEK(*)           | K5  | 52.08 | 213.66 | 0.6836734 | -        | 0.632653 | 0.6581633 |
| Ddx21   | Q9JIK5 | 742  | VK(*)GMVFLK(*)                   | K2  | 34.97 | 129.19 | 0.6530612 | 0.962962 | 0.969387 | 0.861804  |
| Ddx21   | Q9JIK5 | 185  | LK(*)NGLSQPSEEEVDIPK(*)PK(*)     | K2  | 33.97 | 102.18 | -         | -        | 1.030612 | 2245      |
| Ddx21   | Q9JIK5 | 148  | LK(*)NGLSQPSEEEADIPK(*)PK(*)     | K2  | 15.93 | 132.44 | -         | -        | 1.408163 | 265       |
| Mrps34  | Q9JIK9 | 144  | LVPK(*)HEEEAFTAFTAK(*)PEDR(*)    | K4  | 36.22 | 85.14  | 1.31      | 1.265822 | -        | 1.2879114 |
| Ercc6l2 | Q9JIM3 | 905  | IPK(*)NHIR(*)                    | K3  | 33.83 | 1000   | -         | -        | -        | -         |
| Diablo  | Q9JIQ3 | 189  | NHIQLVK(*)SQVQEVN(*)             | K7  | 44.48 | 1000   | 0.9292929 | 1.051948 | 1.256410 | 1.0792171 |
| Slc12a4 | Q9JIS8 | 393  | GEVVEK(*)HGLPSTDTLGLK(*)         | K6  | 43.5  | 63.99  | -         | 0.685393 | -        | -         |
| Ralb    | Q9JIW9 | 115  | VK(*)SEEDK(*)IPLLVVGNK(*)        | K2  | 57.49 | 38.19  | -         | -        | 0.938144 | 33        |
| Ralb    | Q9JIW9 | 16   | SQGSLVLHK(*)VIMVGSGGVGK(*)       | K9  | 49.48 | 97.58  | 0.4943820 | -        | 0.886597 | 0.69049   |
| Ralb    | Q9JIW9 | 167  | ANVDK(*)VFFDLMR(*)               | K5  | 29.89 | 1000   | 0.8988764 | -        | 0.350515 | 0.6246959 |
| Ralb    | Q9JIW9 | 146  | GK(*)AEWGVQYVETSAK(*)            | K2  | 21.53 | 172.92 | -         | -        | 1.391752 | 577       |
| Eny2    | Q9JIX0 | 74   | GLEHVTVDLVAEITPK(*)GR(*)         | K17 | 39.27 | 1000   | 0.5887850 | -        | -        | -         |
| Acin1   | Q9JIX8 | 1048 | IK(*)SHC(+57.02)FVTYSTVEEAVATR(  | K2  | 41.22 | 1000   | 1.1313131 | 1.602739 | 1.333333 | 1.3557954 |
| Htra2   | Q9JIY5 | 395  | EPSFPDVQHGVLIHK(*)VILGSPAHR(     | K15 | 39.56 | 1000   | 0.8918918 | -        | 0.953488 | 0.9226901 |
| Flii    | Q9JJ28 | 92   | ANSLK(*)NSGVPDDIFK(*)            | K5  | 42.64 | 150.82 | 0.7676767 | -        | 1.115789 | 0.9417331 |
| Pbk     | Q9JJ78 | 89   | ILK(*)NLNHPNIIIGYR(*)            | K3  | 21.02 | 1000   | 1.3953488 | 2.214285 | 1.103448 | 1.5710276 |
| Rpf2    | Q9JJ80 | 31   | LTENIK(*)NAMLIK(*)               | K6  | 32.38 | 129.15 | 0.8979591 | -        | 0.608695 | 0.7533274 |
| Ccdc86  | Q9JJ89 | 38   | ALVDFK(*)SNSEETGELK(*)           | K6  | 54.16 | 153.52 | 1.3111111 | -        | 0.964285 | 1.1376984 |
| Wdr12   | Q9JJA4 | 291  | VWDVESGGLK(*)STLTGNK(*)          | K10 | 62.45 | 118.11 | 0.8539325 | 0.650602 | 0.948453 | 0.8176629 |
| Wdr12   | Q9JJA4 | 44   | LLETK(*)NELHK(*)                 | K5  | 38.07 | 41.96  | 0.8988764 | 0.759036 | 4.164948 | 1.9409537 |
| Wdr12   | Q9JJA4 | 214  | MLK(*)IIVSTVPTDEEDEMEEATNR(*)    | K3  | 22.6  | 1000   | -         | -        | 0.865979 | 381       |
| Wdr12   | Q9JJA4 | 49   | NELHK(*)HVEFDLIK(*)              | K5  | 9.03  | 22.83  | -         | -        | 3.340206 | 186       |
| Rpl38   | Q9JJI8 | 57   | LK(*)QSLPPGLAVK(*)               | K2  | 31    | 113.72 | -         | 1.406976 | 0.709677 | 1.0583271 |
| Lancl2  | Q9JJK2 | 166  | LK(*)SEC(+57.02)ESQEC(+57.02)ITK | K2  | 66.3  | 267.5  | 1.0215053 | 1.078947 | 1.096774 | 1.0657423 |
| Lancl2  | Q9JJK2 | 177  | SEC(+57.02)ESQEC(+57.02)ITK(*)LL | K11 | 25.14 | 1000   | -         | -        | 1.688172 | 043       |
| Phax    | Q9JJT9 | 330  | QAIK(*)SLNFQEDDDTSR(*)           | K4  | 64.78 | 1000   | 0.3885350 | 0.443037 | 0.537634 | 0.4564025 |
| Ddx20   | Q9JJY4 | 519  | LPVK(*)SHSEC(+57.02)GVLEK(*)     | K4  | 8.4   | 30.19  | -         | 0.959459 | -        | -         |
| Psmg1   | Q9JK23 | 265  | C(+57.02)LVK(*)NIPESTEILK(*)     | K4  | 38.09 | 54.53  | -         | -        | 0.868131 | 868       |
| Psmg1   | Q9JK23 | 194  | ALK(*)TQTFK(*)                   | K3  | 27.42 | 105.53 | -         | 1.293333 | 0.934065 | 1.1136996 |
| Sh3glb1 | Q9JK48 | 188  | AAETK(*)SSSEQELR(*)              | K5  | 26.91 | 1000   | 0.6767676 | 0.888888 | -        | 0.7828283 |
| Sh3glb1 | Q9JK48 | 48   | TELDAHLENLLSK(*)AEC(+57.02)TK(   | K13 | 23.57 | 33.54  | 1.0808080 | -        | 0.816091 | 0.94845   |

|         |        |      |                                 |     |       |        |           |          |          |             |
|---------|--------|------|---------------------------------|-----|-------|--------|-----------|----------|----------|-------------|
| Myg1    | Q9JK81 | 254  | FK(*)VDSSGEIVELAK(*)            | K2  | 61.92 | 267.48 | 0.8064516 | 0.794520 | 1.034883 | 0.8786186   |
| Myg1    | Q9JK81 | 266  | VDSSGEIVELAK(*)GGC(+57.02)PWK   | K12 | 42.85 | 78.19  | 0.6559139 | 1.273972 | 0.790697 | 0.9068614   |
| Hspb8   | Q9JK92 | 137  | QQEGGIVSK(*)NFTK(*)             | K9  | 55.31 | 28.7   | -         | 1.223880 | 0.894117 | 1.0589991   |
| Uchl3   | Q9JKB1 | 74   | IK(*)SQGQDVTSSVYFMK(*)          | K2  | 26    | 208.29 | 2.3695652 | 1.602409 | 0.707865 | 1.5599467   |
| Ybx3    | Q9JKB3 | 82   | VLATK(*)VLGTVK(*)               | K5  | 78.38 | 1000   | 0.8367346 | 1.608695 | 1.214285 | 1.2199054   |
| Iqgap1  | Q9JKF1 | 687  | WVK(*)HWVK(*)                   | K3  | 86.35 | 82.24  | 0.8125    | 0.746835 | 0.977777 | 0.8457044   |
| Iqgap1  | Q9JKF1 | 1475 | LTELGTVDPK(*)NR(*)              | K10 | 60.48 | 1000   | 0.8333333 | 0.772151 | 0.977777 | 0.8610877   |
| Iqgap1  | Q9JKF1 | 1128 | LPYDVTPEQALSHEEVK(*)TR(*)       | K17 | 52.3  | 1000   | 1.8645833 | -        | 1.733333 | 1.7989583   |
| Iqgap1  | Q9JKF1 | 1088 | SLNIK(*)TDPVDIYK(*)             | K5  | 48.95 | 118.44 | 1.3854166 | -        | 0.777777 | 1.0815972   |
| Iqgap1  | Q9JKF1 | 924  | NK(*)ITLQDVVSHSK(*)             | K2  | 38.35 | 94.57  | -         | -        | 1.244444 | 1.244444    |
| Iqgap1  | Q9JKF1 | 1532 | SYIK(*)TC(+57.02)LDNLASK(*)     | K4  | 36.91 | 158.68 | 0.6875    | 1.139240 | 1.666666 | 1.1644691   |
| Iqgap1  | Q9JKF1 | 88   | LGNFFSPK(*)VVSLK(*)             | K8  | 34.78 | 26.93  | 0.3333333 | -        | -        | -           |
| Iqgap1  | Q9JKF1 | 922  | IGLLVK(*)NK(*)                  | K6  | 33.88 | 27.16  | 0.7708333 | 1.037974 | 1.311111 | 1.039973    |
| Iqgap1  | Q9JKF1 | 1037 | SK(*)VDQIQEIVTGNPTVIK(*)        | K2  | 31.09 | 157.79 | 0.78125   | -        | 1.033333 | 0.9072917   |
| Iqgap1  | Q9JKF1 | 104  | YK(*)ATGLHFR(*)                 | K2  | 11.73 | 1000   | 1.2604166 | -        | -        | -           |
| Mrpl39  | Q9JKF7 | 233  | YK(*)VDFIEEK(*)                 | K2  | 37.29 | 142.27 | 1.8955223 | 1.440677 | 1.307692 | 1.5479642   |
| Mrpl39  | Q9JKF7 | 69   | HVGK(*)TDPGTVFVMNK(*)           | K4  | 19.73 | 112.22 | -         | 2.237288 | -        | -           |
| Hyou1   | Q9JKR6 | 106  | YFQHLLGK(*)QADNPHVALYR(*)       | K8  | 36.05 | 1000   | 0.3473684 | 1.578947 | 0.617977 | 0.8480978   |
| Adrm1   | Q9JKV1 | 113  | LFFWMQEPK(*)TDQDEEHC(+57.02)    | K9  | 48.7  | 1000   | -         | -        | 0.880434 | 0.880434783 |
| Aatf    | Q9JKX4 | 243  | GGPEFASALK(*)NSHK(*)            | K10 | 39.57 | 34.3   | 0.7156862 | 0.774647 | 1.265486 | 0.918607    |
| Aatf    | Q9JKX4 | 349  | LGK(*)GFGAFER(*)                | K3  | 23.22 | 1000   | 0.5686274 | 1.408450 | -        | 0.9885391   |
| Nudt5   | Q9JKX6 | 13   | ESTESSPGK(*)HLVTSEELISEGK(*)    | K9  | 80.53 | 67.58  | 0.8125    | 0.795180 | 0.947368 | 0.851683    |
| Nudt5   | Q9JKX6 | 56   | GK(*)SADAVSVIPVLQR(*)           | K2  | 47.11 | 1000   | 1.8645833 | 0.807228 | 0.768421 | 1.1467444   |
| Nudt5   | Q9JKX6 | 32   | FEK(*)TTYMDPTGK(*)              | K3  | 38.08 | 142.42 | 1.1979166 | 0.831325 | 0.968421 | 0.999221    |
| Hip1r   | Q9JKY5 | 261  | FHEQFHSLK(*)NFFR(*)             | K9  | 28.4  | 1000   | -         | -        | -        | -           |
| Slc5a3  | Q9JKZ2 | 290  | VLAAC(*)NIAHAK(*)               | K5  | 84.45 | 129.19 | 0.8876404 | 0.831168 | 0.936170 | 0.8849932   |
| Slc5a3  | Q9JKZ2 | 665  | FIDWFC(+57.02)GFK(*)SK(*)       | K9  | 25.76 | 24.32  | 1.2696629 | -        | 1.829787 | 1.5497251   |
| Aldh9a1 | Q9JLJ2 | 368  | LK(*)HGYYMTPC(+57.02)ILTNC(+57  | K2  | 43.23 | 1000   | 1.4155844 | 1.32     | 0.949494 | 1.2283598   |
| Dcl1    | Q9JLM8 | 155  | NVNPNSVSVNVK(*)TTSASR(*)        | K11 | 33.67 | 1000   | 1.9797979 | -        | 0.758620 | 1.3692093   |
| Cul3    | Q9JLV5 | 542  | FYLAK(*)HSGR(*)                 | K5  | 84.56 | 1000   | 0.8       | 1        | 0.836956 | 0.8789855   |
| Cul3    | Q9JLV5 | 68   | NAYTMVLHK(*)HGK(*)              | K9  | 64.82 | 55.36  | -         | 0.987012 | 0.945652 | 0.9663326   |
| Cul3    | Q9JLV5 | 271  | ELISK(*)HMK(*)                  | K5  | 51.83 | 28.96  | 0.95      | 0.766233 | 0.858695 | 0.8583098   |
| Cul3    | Q9JLV5 | 459  | LK(*)TEC(+57.02)GC(+57.02)QFTSK | K2  | 46.11 | 164.65 | 0.77      | 0.883116 | 0.663043 | 0.7720535   |
| Cul3    | Q9JLV5 | 700  | VDDDR(*)K(*)HEIEAAIVR(*)        | K6  | 44.48 | 1000   | -         | -        | 1.065217 | 1.065217391 |

|         |        |      |                               |     |       |        |           |          |             |           |
|---------|--------|------|-------------------------------|-----|-------|--------|-----------|----------|-------------|-----------|
| Cul3    | Q9JLV5 | 254  | VMHC(+57.02)LDK(*)STEEPIVK(*) | K7  | 34.3  | 65.33  | 1.08      | 1.259740 | 1           | 1.1132468 |
| Cul3    | Q9JLV5 | 444  | LLTNK(*)SVSDDSEK(*)           | K5  | 5.29  | 36.2   | -         | -        | 2.304347826 |           |
| Pias4   | Q9JMO5 | 118  | LPTK(*)TLK(*)PEVR(*)          | K4  | 55.54 | 53.53  | 0.6017699 | -        | -           |           |
| Rabgef1 | Q9JM13 | 213  | IMDQIEK(*)HIMTR(*)            | K7  | 35.57 | 1000   | -         | -        | 0.596638655 |           |
| Rabgef1 | Q9JM13 | 151  | TFHK(*)TGQEVYK(*)             | K4  | 25.19 | 96.04  | -         | 0.804597 | 0.487394    | 0.6459963 |
| Arpc3   | Q9JM76 | 56   | ANVFFK(*)NYEIK(*)             | K6  | 96.14 | 111.23 | 0.8229166 | 0.756097 | 0.890109    | 0.8230414 |
| Arpc3   | Q9JM76 | 61   | NYEIK(*)NEADR(*)              | K5  | 89.27 | 1000   | 1.125     | 1.024390 | 1.274725    | 1.1413718 |
| Arpc3   | Q9JM76 | 123  | PASK(*)QEDEMNR(*)             | K4  | 49.76 | 1000   | 0.8125    | 0.707317 | 0.813186    | 0.777668  |
| Usp14   | Q9JMA1 | 313  | NALYIK(*)SSK(*)               | K6  | 59.77 | 28.96  | 1.3736263 | 0.864864 | 1.613636    | 1.2840425 |
| Edf1    | Q9JMG1 | 25   | SK(*)QAILAAQR(*)              | K2  | 35.29 | 1000   | 0.6744186 | 0.717647 | 0.976744    | 0.7896033 |
| Edf1    | Q9JMG1 | 98   | DLATK(*)INEK(*)PQVIADYESGR(*) | K5  | 32.1  | 49.79  | -         | 1.235294 | 0.918604    | 1.0769494 |
| Txnrd1  | Q9JMH6 | 209  | VEDTVK(*)HDWEK(*)             | K6  | 51.8  | 79.02  | 1.1276595 | 1.084337 | 1.011235    | 1.074411  |
| Txnrd1  | Q9JMH6 | 203  | NYGWK(*)VEDTVK(*)             | K5  | 47.17 | 54.91  | 0.7765957 | 0.867469 | 0.921348    | 0.855138  |
| Txnrd1  | Q9JMH6 | 369  | QFVPTK(*)IEQIEAGTPGR(*)       | K6  | 33.5  | 1000   | 1.9468085 | -        | 1.033707    | 1.4902582 |
| Txnrd1  | Q9JMH6 | 349  | GFDQDMANK(*)IGEHEEHGK(*)      | K9  | 15.9  | 20.33  | 2.3085106 | -        | 0.865168    | 1.5868396 |
| Myo18a  | Q9JMH9 | 1723 | AK(*)TALEEQLSR(*)             | K2  | 35.26 | 1000   | 0.8202247 | 1.839506 | 0.831578    | 1.1637699 |
| Csnk1e  | Q9JMK2 | 122  | IEYIHSK(*)NFIHR(*)            | K7  | 56.38 | 1000   | -         | 0.634408 | -           |           |
| Csnk1e  | Q9JMK2 | 45   | TK(*)HPQLHIESK(*)             | K2  | 15.05 | 181.94 | -         | 0.784946 | -           |           |
| Polk    | Q9QUG2 | 460  | LK(*)NVNFEVK(*)               | K2  | 3.97  | 100.91 | -         | -        | 0.935897436 |           |
| Rhoa    | Q9QUI0 | 104  | WTPEVK(*)HFC(+57.02)PNVPIILVG | K6  | 90.85 | 114.83 | 0.6938775 | 0.666666 | 0.901098    | 0.753881  |
| Rhoa    | Q9QUI0 | 162  | IGAFGYMEC(+57.02)SAK(*)TK(*)  | K12 | 70.87 | 27.16  | 0.9489795 | 0.864197 | 0.945054    | 0.9194107 |
| Acsl4   | Q9QUJ7 | 223  | AALVDINC(+57.02)VK(*)HIIYVDNK | K10 | 34.63 | 40.87  | 0.9333333 | -        | 0.913043    | 0.9231884 |
| PsmA6   | Q9QUM9 | 45   | GK(*)DC(+57.02)AVIVTQK(*)     | K2  | 45.27 | 203.33 | 0.8282828 | 0.740259 | 0.955056    | 0.8411996 |
| PsmA6   | Q9QUM9 | 104  | YK(*)YGYEIPVDMLC(+57.02)K(*)  | K2  | 37.79 | 182.53 | 0.6969696 | 0.792207 | 0.898876    | 0.796018  |
| Prep    | Q9QUR6 | 588  | FHK(*)FTIGHAWTTDYGC(+57.02)SC | K3  | 55.17 | 50.24  | 0.7894736 | -        | -           |           |
| Prep    | Q9QUR6 | 183  | FTC(+57.02)MAWTHDGK(*)GMFYN   | K11 | 36.5  | 90.21  | 1.2315789 | -        | -           |           |
| Prep    | Q9QUR6 | 196  | GMFYNSYPQQDGK(*)SDGTETSTNLH   | K13 | 35.82 | 24.74  | -         | -        | 0.641304348 |           |
| Prep    | Q9QUR6 | 157  | FMK(*)VDGAK(*)                | K3  | 26.21 | 87.95  | 0.8421052 | 0.936708 | 0.663043    | 0.8139525 |
| Prep    | Q9QUR6 | 449  | DGTK(*)IPMFIVHK(*)            | K4  | 11.46 | 100.36 | -         | 1.101265 | -           |           |
| Prep    | Q9QUR6 | 677  | QSNPLLIHVDTK(*)AGHGAGK(*)PTA  | K12 | 8.85  | 26.08  | -         | -        | 3.054347826 |           |
| Pin1    | Q9QUR7 | 65   | C(+57.02)SHLLVK(*)HSQSR(*)    | K7  | 49.35 | 1000   | -         | 0.911392 | 1.1         | 1.0056962 |
| Pin1    | Q9QUR7 | 84   | SK(*)EEALELINGYIQK(*)         | K2  | 27.08 | 251.71 | 0.5578947 | 0.683544 | 0.688888    | 0.6434426 |
| Naga    | Q9QWR8 | 321  | SK(*)SHIEVFK(*)               | K2  | 35.65 | 209.49 | 0.5806451 | -        | 1.087912    | 0.8342786 |
| Kifc1   | Q9QWT9 | 63   | VMGAVTK(*)VDTSR(*)PR(*)       | K7  | 88.03 | 1000   | 1.0744680 | 0.864406 | 0.920454    | 0.9531098 |

|       |        |      |                                  |     |       |        |           |          |             |           |
|-------|--------|------|----------------------------------|-----|-------|--------|-----------|----------|-------------|-----------|
| Kifc1 | Q9QWT9 | 63   | VMGAVTK(*)VDTSR(*)               | K7  | 69.9  | 1000   | 1.0425531 | 0.542372 | 0.977272    | 0.8540663 |
| Kifc1 | Q9QWT9 | 660  | FASK(*)VNQC(+57.02)VIGTAQANK(*)  | K4  | 36.33 | 205.45 | 0.7978723 | 1.050847 | 0.909090    | 0.9192702 |
| Ccnt1 | Q9QWV9 | 491  | VHSAGDK(*)HNSIEDSVTK(*)          | K7  | 74.49 | 66.12  | 0.5229885 | 0.475609 | 0.718446    | 0.5723483 |
| Ccnt1 | Q9QWV9 | 395  | AK(*)HAEELAAQK(*)                | K2  | 36.03 | 164.46 | -         | -        | 0.757281553 |           |
| Ccnt1 | Q9QWV9 | 556  | HSSQTSTLAHK(*)TYSLSSTLSSSSSTR(*) | K11 | 32.25 | 1000   | 0.4137931 | 0.548780 | 0.611650    | 0.5247414 |
| Ccnt1 | Q9QWV9 | 475  | AVSSK(*)PEEIK(*)                 | K5  | 18.91 | 38.77  | 0.5804597 | -        | 0.941747    | 0.7611037 |
| Son   | Q9QX47 | 2073 | LTDLDK(*)AQLLEIAK(*)             | K6  | 95.88 | 217.23 | 1.2       | 0.973333 | 0.936842    | 1.0367251 |
| Son   | Q9QX47 | 2073 | R(*)LTDLDK(*)AQLLEIAK(*)         | K7  | 77.52 | 216.51 | 1.1       | 1.106666 | 0.821052    | 1.0092398 |
| Son   | Q9QX47 | 2388 | DLSGK(*)HPVSALMEIC(+57.02)NK(*)  | K5  | 34.8  | 129.85 | -         | -        | 0.947368421 |           |
| Son   | Q9QX47 | 141  | LK(*)SHHDGNLESDSFLK(*)           | K2  | 17.28 | 153.62 | -         | 0.8      | -           |           |
| Cyhr1 | Q9QXA1 | 298  | LLAAK(*)NINLR(*)                 | K5  | 36.44 | 1000   | -         | -        | -           |           |
| Drg2  | Q9QXB9 | 59   | GEGFDVMK(*)SGDAR(*)              | K8  | 20.89 | 1000   | 0.7021276 | 0.820512 | -           | 0.7613202 |
| Tbl1x | Q9QXE7 | 453  | GVC(+57.02)IHTLTk(*)HQEPVYSVAF   | K9  | 58.82 | 197.28 | 1.0813953 | -        | 1.105882    | 1.0936389 |
| Chm   | Q9QXG2 | 93   | DK(*)TIQHVEVFC(+57.02)YASQDLH    | K2  | 14.21 | 151.7  | -         | -        | 1.329896907 |           |
| Chm   | Q9QXG2 | 270  | YAEFK(*)NITR(*)                  | K5  | 8.63  | 1000   | -         | 3.492957 | 1.268041    | 2.3804995 |
| Cpsf3 | Q9QXK7 | 100  | TFMTHATK(*)AIYR(*)               | K8  | 26.85 | 1000   | -         | -        | 0.81443299  |           |
| Plec  | Q9QXS1 | 1733 | ASFAEK(*)TAQLER(*)               | K6  | 86.61 | 1000   | 0.8936170 | -        | 0.788888    | 0.841253  |
| Plec  | Q9QXS1 | 197  | WVVK(*)HLIK(*)                   | K4  | 83.42 | 67.69  | 0.9148936 | 1.153846 | 0.944444    | 1.0043947 |
| Plec  | Q9QXS1 | 2263 | LK(*)QSAEEQAQAQAQAQAAAEK(*)      | K2  | 81.69 | 295.37 | 0.8085106 | 0.705128 | 0.9         | 0.8045463 |
| Plec  | Q9QXS1 | 1994 | LK(*)TEAEIALK(*)                 | K2  | 77.69 | 175.25 | 0.9574468 | 1        | 0.788888    | 0.9154452 |
| Plec  | Q9QXS1 | 1251 | STQGAEEVLK(*)THEEQLK(*)          | K10 | 74.62 | 27.33  | 1.0106382 | 0.743589 | 0.933333    | 0.8958538 |
| Plec  | Q9QXS1 | 1234 | LK(*)TISLVIR(*)                  | K2  | 74.16 | 1000   | 0.9361702 | 0.923076 | 0.888888    | 0.9160453 |
| Plec  | Q9QXS1 | 2107 | SK(*)EQAELEAAR(*)                | K2  | 73.67 | 1000   | 1.0638297 | 0.987179 | 1.222222    | 1.0910772 |
| Plec  | Q9QXS1 | 2033 | LEEQAALHK(*)ADIEER(*)            | K9  | 71.69 | 1000   | 1.3191489 | 0.679487 | 0.833333    | 0.9439898 |
| Plec  | Q9QXS1 | 2033 | R(*)LEEQAALHK(*)ADIEER(*)        | K10 | 68.92 | 1000   | 0.8829787 | 0.705128 | 1.588888    | 1.0589986 |
| Plec  | Q9QXS1 | 2910 | EGVVGPELHHK(*)LLSAER(*)          | K11 | 67.18 | 1000   | 1         | 0.756410 | 0.8         | 0.8521368 |
| Plec  | Q9QXS1 | 349  | HK(*)PMLIDMKN(*)                 | K2  | 66.82 | 112.99 | 0.9680851 | 1.025641 | 1.066666    | 1.0201309 |
| Plec  | Q9QXS1 | 2314 | QAADAEMEK(*)HK(*)                | K9  | 64.77 | 36.05  | 0.9680851 | 1        | 0.866666    | 0.9449173 |
| Plec  | Q9QXS1 | 2055 | QK(*)GLVEDTLR(*)                 | K2  | 57.53 | 1000   | -         | -        | 1           |           |
| Plec  | Q9QXS1 | 2714 | R(*)K(*)QEELQHLEQQR(*)           | K2  | 54.13 | 1000   | 0.8617021 | 0.743589 | 1.1         | 0.901764  |
| Plec  | Q9QXS1 | 969  | QVEVTVHK(*)GDQC(+57.02)QLVGP     | K8  | 47.01 | 121.01 | 1.1063829 | 0.794871 | 0.922222    | 0.941159  |
| Plec  | Q9QXS1 | 4511 | TK(*)MSAAQALK(*)                 | K2  | 44.39 | 141.48 | -         | 0.384615 | 0.877777    | 0.6311966 |
| Plec  | Q9QXS1 | 3558 | LYVHEAVK(*)AGVVGPELHEK(*)        | K8  | 34.43 | 80.31  | 1.0319148 | 1.089743 | 0.933333    | 1.0183306 |
| Plec  | Q9QXS1 | 2086 | AAAGK(*)AELELELGR(*)             | K5  | 29.78 | 1000   | 1.1276595 | -        | -           |           |



|          |        |      |                                  |     |       |        |           |          |             |           |
|----------|--------|------|----------------------------------|-----|-------|--------|-----------|----------|-------------|-----------|
| Plec     | Q9QXS1 | 3391 | VEVPVGSFK(*)GR(*)                | K9  | 25.58 | 1000   | 0.8510638 | 0.974358 | 0.4666666   | 0.7640298 |
| Plec     | Q9QXS1 | 357  | HK(*)PMLIDMKN(*)VYR(*)           | K10 | 24.7  | 78.17  | -         | -        | 0.777777778 |           |
| Plec     | Q9QXS1 | 3292 | LLDAQSLTGGIVDPSK(*)SHR(*)        | K16 | 22.09 | 1000   | -         | -        | 1.133333333 |           |
| Plec     | Q9QXS1 | 592  | DLDK(*)ADGMIR(*)                 | K4  | 14.15 | 1000   | -         | -        | 1.122222222 |           |
| Plec     | Q9QXS1 | 2347 | LQLETDHQK(*)SILDEELQR(*)         | K10 | 13.05 | 1000   | 1.1702127 | -        | -           |           |
| Plec     | Q9QXS1 | 4355 | QYDIDDAITK(*)NLIDR(*)            | K10 | 13.02 | 1000   | 1.1702127 | -        | -           |           |
| Plec     | Q9QXS1 | 247  | FHK(*)LQNVQIALDYLR(*)            | K3  | 12.28 | 1000   | -         | -        | 1.288888889 |           |
| Plec     | Q9QXS1 | 578  | LLASGK(*)VAQR(*)                 | K6  | 3.39  | 1000   | -         | -        | 0.788888889 |           |
| Macf1    | Q9QXZ0 | 4202 | LQQFMENK(*)SR(*)                 | K8  | 63.19 | 1000   | 1.375     | -        | -           |           |
| Macf1    | Q9QXZ0 | 6226 | HHVLK(*)NDVLAHQATVATVNK(*)       | K5  | 25.7  | 157.56 | -         | -        | 1.010869565 |           |
| Macf1    | Q9QXZ0 | 6367 | GDSGSGSK(*)TEQSVALLEQK(*)        | K8  | 5.35  | 112.13 | -         | -        | 1.108695652 |           |
| Vapb     | Q9QY76 | 118  | EAK(*)PEDLMDSK(*)LR(*)           | K11 | 29.98 | 58.11  | 0.7634408 | 1.013157 | 0.681318    | 0.8193058 |
| Clic4    | Q9QYB1 | 110  | LSPK(*)HPESNTAGMDIFAK(*)         | K4  | 48.73 | 115.47 | -         | -        | 0.547619048 |           |
| Clic4    | Q9QYB1 | 130  | IK(*)NSR(*)PEANEALER(*)          | K2  | 26.06 | 1000   | -         | -        | 1.357142857 |           |
| Clic4    | Q9QYB1 | 130  | FSAYIK(*)NSR(*)PEANEALER(*)      | K6  | 16.94 | 1000   | 0.8222222 | 1.342857 | 0.952380    | 1.0391534 |
| Add1     | Q9QYC0 | 288  | ILIQK(*)NLGPK(*)                 | K5  | 45.88 | 76.42  | -         | 0.431578 | 0.449438    | 0.4405086 |
| Dnajc7   | Q9QYI3 | 128  | ALELDHK(*)NAQAQQEFK(*)           | K7  | 11.64 | 77.76  | -         | 1.151898 | -           |           |
| Dnaja2   | Q9QYJ0 | 152  | NVLC(+57.02)SAC(+57.02)SGQGKG    | K13 | 79.02 | 94.27  | 0.8958333 | 0.898734 | 0.927083    | 0.9072169 |
| Dnaja2   | Q9QYJ0 | 226  | GMK(*)HGQR(*)                    | K3  | 68.15 | 1000   | -         | 0.962025 | 0.979166    | 0.970596  |
| Dnajb1   | Q9QYJ3 | 195  | LNPDK(*)SIR(*)                   | K6  | 29.05 | 1000   | 1         | -        | -           |           |
| Cenph    | Q9QYM8 | 45   | AQTK(*)QQLLEYK(*)                | K4  | 14.76 | 147.63 | -         | 1.370370 | 0.562162    | 0.9662663 |
| Spast    | Q9QYY8 | 517  | LLLLK(*)NLLC(+57.02)K(*)         | K5  | 28.5  | 119.54 | 1.3255813 | -        | 0.399014    | 0.8622981 |
| Tollip   | Q9QZ06 | 66   | LAK(*)NYGMTR(*)                  | K3  | 5.93  | 1000   | 1.9571428 | -        | -           |           |
| Vps29    | Q9QZ88 | 50   | ESYDYLK(*)TLAGDVHIVR(*)          | K7  | 54.56 | 1000   | 0.9081632 | -        | 0.946236    | 0.9271999 |
| Vps29    | Q9QZ88 | 43   | IQHILC(+57.02)TGNLC(+57.02)TK(*) | K13 | 22.71 | 79.39  | 1.4489795 | 2.506172 | 1.774193    | 1.909782  |
| Dctn5    | Q9QZB9 | 21   | SEYIETASGNK(*)VSR(*)             | K11 | 27.49 | 1000   | -         | 1.392857 | 1.149425    | 1.2711412 |
| Slc25a10 | Q9QZD8 | 253  | FK(*)GLFPAGIR(*)                 | K2  | 13.95 | 1000   | -         | 0.921052 | -           |           |
| Eif3i    | Q9QZD9 | 91   | QLALLK(*)TNSAVR(*)               | K6  | 71.83 | 1000   | 1.1578947 | 0.795180 | 0.978723    | 0.9772663 |
| Eif3i    | Q9QZD9 | 224  | LFDSTTLEHQK(*)TFR(*)             | K11 | 55.33 | 1000   | -         | 0.662650 | 0.925531    | 0.7940913 |
| Eif3i    | Q9QZD9 | 2    | MK(*)PILLQGHER(*)                | K2  | 47.69 | 1000   | 0.7052631 | 0.554216 | 1.085106    | 0.7815288 |
| Eif3i    | Q9QZD9 | 282  | VK(*)GHFGPINSVAFHPDGG(*)         | K2  | 42.68 | 209.24 | 0.9368421 | 0.975903 | 1.117021    | 1.0099223 |
| Copg1    | Q9QZE5 | 317  | VAMK(*)HPSAVTAC(+57.02)NLDLE     | K4  | 70.92 | 1000   | -         | -        | 0.904255319 |           |
| Copg1    | Q9QZE5 | 465  | ILHLLGQEGPK(*)TNNPSK(*)          | K11 | 56.66 | 95.35  | 0.7628865 | 0.65     | 0.797872    | 0.7369196 |
| Copg1    | Q9QZE5 | 823  | SDK(*)VPENK(*)NTHTLLAGVFR(*)     | K8  | 42.05 | 47.14  | 1.1649484 | -        | 1.095744    | 1.1303466 |



|        |        |      |                                |     |       |        |           |          |                     |
|--------|--------|------|--------------------------------|-----|-------|--------|-----------|----------|---------------------|
| Copg1  | Q9QZE5 | 313  | TLNK(*)VAMK(*)                 | K4  | 26.86 | 64.94  | -         | -        | 0.85106383          |
| Copg1  | Q9QZE5 | 262  | NK(*)HEMVVYEAASIVNLPGC(+57.02) | K2  | 7.69  | 109.58 | -         | -        | 0.5                 |
| Tsnax  | Q9QZE7 | 247  | LYTLK(*)QSLAK(*)               | K5  | 38.59 | 47.14  | -         | -        | 0.877358491         |
| Ppie   | Q9QZH3 | 108  | FSGK(*)TLEENK(*)EEEGPEPPK(*)   | K4  | 11.95 | 41.57  | -         | 1.111111 | 0.769230; 0.9401709 |
| Ripk3  | Q9QZL0 | 307  | DK(*)VDAAVSEVK(*)HYLSQHR(*)    | K11 | 35.2  | 95.39  | -         | -        | 0.642105263         |
| Ripk3  | Q9QZL0 | 230  | EAELVDK(*)TSLIR(*)             | K7  | 13.3  | 1000   | -         | -        | 1.178947368         |
| Ubqln2 | Q9QZM0 | 66   | FK(*)SQTDQLVLIFAGK(*)          | K2  | 27.2  | 48.26  | -         | -        | 0.921348315         |
| Afdn   | Q9QZQ1 | 1544 | EIHELQNK(*)VDR(*)              | K8  | 5.72  | 1000   | -         | -        | 1.296703297         |
| H2afy  | Q9QZQ8 | 295  | TVK(*)NC(+57.02)LALADDR(*)     | K3  | 74.12 | 1000   | 0.6326530 | 0.717647 | 1.010526; 0.7869421 |
| H2afy  | Q9QZQ8 | 307  | LK(*)SIAFPSIGSGR(*)            | K2  | 52.52 | 1000   | 0.8571428 | -        | -                   |
| Zranb2 | Q9R020 | 54   | AGGTEIGK(*)TLAEK(*)            | K8  | 21.39 | 115.97 | -         | 0.666666 | 1.333333; 1         |
| Gyg1   | Q9R062 | 218  | TK(*)PWNYTYNPQTK(*)            | K2  | 5.22  | 67.73  | -         | -        | 1.142857143         |
| Pex14  | Q9R0A0 | 220  | SEINSLK(*)GLLLNR(*)            | K7  | 8.96  | 1000   | -         | -        | 0.78313253          |
| Plod3  | Q9R0E1 | 503  | DK(*)GIFLHLSNQHEFGR(*)         | K2  | 61.27 | 1000   | 0.6989247 | 0.653846 | 1.220930; 0.8579004 |
| Plod3  | Q9R0E1 | 218  | LSLDHK(*)SR(*)                 | K6  | 55.99 | 1000   | 1.7849462 | -        | -                   |
| Plod3  | Q9R0E1 | 648  | TYVGPMTEYLFPGYHTK(*)TR(*)      | K17 | 42.73 | 1000   | 0.9784946 | 0.897435 | - 0.9379653         |
| Plod1  | Q9R0E2 | 331  | HHK(*)LQVEQFLAHEGSEYQSVK(*)    | K3  | 25.69 | 125.43 | -         | -        | 1.099099099         |
| Ylpm1  | Q9R0I7 | 688  | DTPVK(*)SGGLLADPPK(*)          | K5  | 32.26 | 168.62 | -         | 0.878378 | -                   |
| Ylpm1  | Q9R0I7 | 894  | DMPTNK(*)VEQIPYGER(*)          | K6  | 6.96  | 1000   | 0.4516129 | -        | -                   |
| Pcm1   | Q9R0L6 | 1073 | LK(*)QMLTELNR(*)               | K2  | 53.68 | 1000   | -         | -        | 2.525773196         |
| Rab9a  | Q9R0M6 | 20   | IILLGDGGVGK(*)SSLMNR(*)        | K11 | 34.6  | 1000   | 1.2       | -        | 1 1.1               |
| Esd    | Q9R0P3 | 200  | WK(*)AYDATC(+57.02)LVK(*)      | K2  | 16.1  | 154.34 | -         | 3.792682 | 2.168421; 2.980552  |
| Smap   | Q9R0P4 | 62   | LVIGDHK(*)STSHFR(*)            | K7  | 63.97 | 1000   | 1.0196078 | 1.134328 | 1.050632; 1.0681897 |
| Dstn   | Q9R0P5 | 19   | IFYDMK(*)VR(*)                 | K6  | 82.63 | 1000   | 0.9619047 | 0.9875   | 1.138297; 1.0292342 |
| Dstn   | Q9R0P5 | 132  | K(*)FPGIK(*)HEYQANGPEDLNR(*)   | K6  | 75.64 | 45.16  | 0.9333333 | 0.675    | 0.691489; 0.7666076 |
| Dstn   | Q9R0P5 | 132  | FPGIK(*)HEYQANGPEDLNR(*)       | K5  | 62.67 | 1000   | 0.8380952 | 0.8375   | 0.882978; 0.852858  |
| Dstn   | Q9R0P5 | 92   | YALYDASFETK(*)ESR(*)           | K11 | 23.25 | 1000   | -         | 1.8      | -                   |
| Sec11a | Q9R0P6 | 114  | FLTK(*)GDNNVDDR(*)             | K4  | 67.49 | 1000   | 0.7040816 | 0.473684 | 0.597938; 0.5919013 |
| Sec11a | Q9R0P6 | 127  | GLYK(*)QGQHWLEK(*)             | K4  | 43.29 | 159.25 | 0.7448979 | 1.328947 | 0.649484; 0.9077766 |
| Ptges3 | Q9R0Q7 | 65   | HLNEIDLFHC(+57.02)IDPNDK(*)H   | K17 | 97.79 | 20.41  | 1.0989010 | 0.910256 | 1 1.0030525         |
| Ptges3 | Q9R0Q7 | 35   | SK(*)LTFSC(+57.02)LGGSDNFK(*)  | K2  | 93.52 | 310.73 | 1.1758241 | 0.961538 | 1.022727; 1.0533633 |
| Ptges3 | Q9R0Q7 | 33   | DVNVNFEK(*)SK(*)               | K8  | 91.76 | 36.05  | 0.9010989 | 0.807692 | 0.886363; 0.8650516 |
| Acot9  | Q9R0X4 | 155  | IDMC(+57.02)K(*)HSLSPEQDIK(*)  | K5  | 74.15 | 133.99 | 0.8210526 | 0.746835 | 1.034883; 0.8675906 |
| Acot9  | Q9R0X4 | 423  | HFK(*)SMSTPVTLK(*)             | K3  | 72.8  | 140.79 | -         | 1.113924 | 0.953488; 1.0337062 |

|         |        |     |                                |     |       |        |           |          |          |             |
|---------|--------|-----|--------------------------------|-----|-------|--------|-----------|----------|----------|-------------|
| Acot9   | Q9R0X4 | 294 | LK(*)SLDIC(+57.02)HPQER(*)     | K2  | 54.72 | 1000   | 0.7263157 | 0.835443 | 0.941860 | 0.8345398   |
| Acot9   | Q9R0X4 | 183 | MK(*)MFQLHNDEK(*)              | K2  | 18.09 | 204.03 | 3.8421052 | -        | 2.825581 | 3.3338433   |
| Ak1     | Q9R0Y5 | 21  | IIFVVGPGSGK(*)GTQC(+57.02)EK   | K12 | 16.46 | 26.5   | 0.7980769 | 1.2875   | -        | 1.0427885   |
| Sqor    | Q9R112 | 365 | TMC(+57.02)LIMK(*)NQR(*)PIK(*) | K7  | 32.43 | 77.93  | 0.744     | 1.013157 | 0.571428 | 0.7761955   |
| Sqor    | Q9R112 | 260 | DVSVNYK(*)HNLIEVR(*)PDK(*)     | K7  | 25.54 | 64.63  | 0.656     | -        | 0.928571 | 0.7922857   |
| Naa80   | Q9R123 | 303 | DLK(*)GC(+57.02)PIFWMEK(*)     | K3  | 71.28 | 161.52 | -         | -        | -        |             |
| Naa80   | Q9R123 | 242 | AFSK(*)PPC(+57.02)PQPPC(+57.02 | K4  | 8.12  | 31.37  | -         | -        | -        |             |
| Mta2    | Q9R190 | 460 | QTFLQTTK(*)LTR(*)              | K9  | 30.18 | 1000   | -         | 0.639534 | 0.655913 | 0.6477244   |
| Prpf40a | Q9R1C7 | 747 | ESAFK(*)SMLK(*)                | K5  | 45.46 | 20.17  | 0.8247422 | 0.827160 | 0.978021 | 0.8766416   |
| Prpf40a | Q9R1C7 | 196 | SDSGK(*)PYYYNSQTK(*)           | K5  | 36.87 | 109.88 | 0.6288659 | -        | 1.021978 | 0.825422    |
| Nsdhl   | Q9R1J0 | 115 | VNFIGTK(*)TVIETC(+57.02)R(*)   | K7  | 57.95 | 1000   | 0.7222222 | 0.72     | 0.811111 | 0.7511111   |
| Psm4    | Q9R1P0 | 199 | VLNK(*)TMDVSK(*)               | K4  | 72.96 | 134.33 | -         | 0.736842 | 0.666666 | 0.7017544   |
| Psm4    | Q9R1P0 | 222 | ESGK(*)TVIR(*)                 | K4  | 5.83  | 1000   | -         | -        | 0.962962 | 0.963       |
| Psm3    | Q9R1P1 | 17  | GK(*)NC(+57.02)VAIAADR(*)      | K2  | 27.76 | 1000   | -         | 1.604938 | 1.704545 | 1.6547419   |
| Psm2    | Q9R1P3 | 29  | VAASNIVQMK(*)DDHDK(*)          | K10 | 69.24 | 30.64  | 1.1       | 0.961538 | 1.034883 | 1.0321407   |
| Psm1    | Q9R1P4 | 189 | HMSEFMEC(+57.02)NLDELVK(*)HG   | K15 | 75.88 | 1000   | 0.9423076 | -        | 1.065217 | 1.0037625   |
| Psm1    | Q9R1P4 | 41  | SK(*)THAVLVALK(*)              | K2  | 61.99 | 276.35 | 0.8846153 | 0.8625   | 0.934782 | 0.893966    |
| Psm1    | Q9R1P4 | 115 | LVSLIGSK(*)TQIPTQR(*)          | K8  | 47.69 | 1000   | -         | -        | 0.847826 | 0.87        |
| Sae1    | Q9R1T2 | 57  | GLGAEIAK(*)NLILAGVK(*)         | K8  | 69.9  | 124.34 | -         | -        | 0.957446 | 0.95809     |
| Sae1    | Q9R1T2 | 49  | VLIVGMK(*)GLGAEIAK(*)          | K7  | 69.38 | 77.91  | 1.06      | -        | 0.691489 | 0.8757447   |
| Sae1    | Q9R1T2 | 145 | DVIK(*)VDQIC(+57.02)HR(*)      | K5  | 61.43 | 1000   | 1.1       | 1.220779 | 0.808510 | 1.0430966   |
| Sae1    | Q9R1T2 | 187 | VAK(*)VSQGVEDGPEAK(*)          | K3  | 50.07 | 243.69 | 0.91      | 0.961038 | 1.170212 | 1.0137506   |
| Myo1c   | Q9WTI7 | 853 | ELC(+57.02)MK(*)NMVWK(*)       | K5  | 68.85 | 87.95  | 0.7234042 | 0.75     | 0.945054 | 0.8061531   |
| Myo1c   | Q9WTI7 | 704 | HLGYK(*)PEEYK(*)               | K5  | 41.71 | 95.62  | 0.7978723 | -        | -        |             |
| Myo1c   | Q9WTI7 | 281 | VSSINDK(*)SDWK(*)              | K7  | 31.86 | 55.36  | -         | 0.95     | 1.241758 | 1.0958791   |
| Myo1c   | Q9WTI7 | 740 | QSLATK(*)IQAAWR(*)             | K6  | 23.99 | 1000   | 1.1914893 | 1.2625   | 0.835164 | 1.0963847   |
| Lypla2  | Q9WTL7 | 203 | VQFK(*)TYPGVMHSSC(+57.02)PQE   | K4  | 26.27 | 31.43  | -         | -        | 0.755319 | 0.755319149 |
| Ruvbl2  | Q9WTM5 | 9   | A(+42.01)TVAATTK(*)VPEIR(*)    | K8  | 63.81 | 1000   | -         | 1.076923 | 0.846153 | 0.9615385   |
| Ruvbl2  | Q9WTM5 | 197 | VQAGDVITIDK(*)ATGK(*)          | K11 | 62.83 | 41.04  | 0.7216494 | 0.820512 | 0.967032 | 0.8363984   |
| Ruvbl2  | Q9WTM5 | 279 | EQINAK(*)VAEWR(*)              | K6  | 56.85 | 1000   | -         | 0.897435 | 0.989010 | 0.9432234   |
| Ruvbl2  | Q9WTM5 | 186 | DK(*)VQAGDVITIDK(*)            | K2  | 43.2  | 194.28 | 1.2268041 | 0.717948 | 1.010989 | 0.9852473   |
| Ak3     | Q9WTP7 | 29  | ITK(*)HFELK(*)                 | K3  | 88.96 | 95.62  | 0.8085106 | 0.897058 | 0.918604 | 0.8747247   |
| Ak3     | Q9WTP7 | 34  | HFELK(*)HLSSGDLLR(*)           | K5  | 77.26 | 1000   | 1.0744680 | 1.014705 | 1.046511 | 1.0452285   |
| Akap12  | Q9WTQ5 | 475 | MLPK(*)HPEGIVSEVEMLSSQER(*)    | K4  | 41.87 | 1000   | -         | -        | 0.829545 | 0.829545455 |

|         |        |      |                               |     |       |        |           |          |             |           |
|---------|--------|------|-------------------------------|-----|-------|--------|-----------|----------|-------------|-----------|
| Akap12  | Q9WTQ5 | 1505 | AEPEILELESK(*)SNK(*)          | K11 | 27.76 | 29.32  | 1.7752808 | 2.111111 | 0.965909    | 1.6174337 |
| Skp1    | Q9WTX5 | 66   | VIQWC(+57.02)THHK(*)DDPPPPED  | K9  | 34.25 | 44.94  | -         | -        | 1.22826087  |           |
| Cul1    | Q9WTX6 | 493  | LK(*)QAC(+57.02)GFEYTSK(*)    | K2  | 75    | 226.64 | 0.9405940 | -        | -           |           |
| Cul1    | Q9WTX6 | 596  | GELVTNC(+57.02)FK(*)NR(*)     | K9  | 66.51 | 1000   | 0.8118811 | 0.806818 | 0.947368    | 0.8553559 |
| Cul1    | Q9WTX6 | 726  | VLK(*)HQQLLGEVLTQLSSR(*)      | K3  | 58.29 | 1000   | 0.8712871 | -        | 0.968421    | 0.9198541 |
| Mad1l1  | Q9WTX8 | 61   | SK(*)SYLIQVER(*)              | K2  | 12.54 | 1000   | 1.3333333 | -        | 1.517241    | 1.4252874 |
| Pfdn5   | Q9WU28 | 124  | IQPALQEK(*)HAMK(*)            | K8  | 79.93 | 48.97  | 0.7924528 | 0.864864 | 0.956989    | 0.8714356 |
| Pfdn5   | Q9WU28 | 55   | DC(+57.02)LNVLNK(*)SNEGK(*)   | K8  | 68.08 | 79.02  | 0.6981132 | 0.932432 | 0.860215    | 0.8302536 |
| Pfdn5   | Q9WU28 | 112  | K(*)IDFLTK(*)QMEK(*)          | K7  | 49.92 | 38.03  | 0.8396226 | 0.729729 | 0.752688    | 0.7740135 |
| Ncor2   | Q9WU42 | 1955 | TPAK(*)NLAPHHASPDPPAPTSASDLI  | K4  | 60.68 | 1000   | 0.8       | 0.735632 | 0.931034    | 0.8222222 |
| Pus1    | Q9WU56 | 236  | LLAC(+57.02)YK(*)GTHNFHNFTSQK | K6  | 38.91 | 22.7   | -         | -        | 1.06        |           |
| Pdcd6ip | Q9WU78 | 60   | PLDK(*)HEGALETLLR(*)          | K4  | 83.69 | 1000   | 1.0561797 | 0.833333 | 0.988764    | 0.9594257 |
| Pdcd6ip | Q9WU78 | 501  | AVLDK(*)AVQADGQVK(*)          | K5  | 76.69 | 195.94 | 0.9775280 | 0.782051 | 1           | 0.9198598 |
| Pdcd6ip | Q9WU78 | 285  | LQHAAELIK(*)NVASR(*)          | K9  | 67.96 | 1000   | 1.0898876 | 1.025641 | 1           | 1.0385096 |
| Pdcd6ip | Q9WU78 | 627  | K(*)QEGLLK(*)NIQVSHQEFSK(*)   | K7  | 65.85 | 34.81  | 1.0337078 | -        | -           |           |
| Pdcd6ip | Q9WU78 | 60   | SALGR(*)PLDK(*)HEGALETLLR(*)  | K9  | 61.99 | 1000   | 1.0449438 | 0.705128 | 1.168539    | 0.9728705 |
| Pdcd6ip | Q9WU78 | 101  | DAFDK(*)GSLFGGSVK(*)          | K5  | 53.03 | 109.98 | 0.8651685 | 0.794871 | 0.943820    | 0.8679535 |
| Pdcd6ip | Q9WU78 | 209  | MK(*)DAIIAK(*)                | K2  | 45.78 | 129.72 | 0.8426966 | -        | 1.191011    | 1.0168539 |
| Pdcd6ip | Q9WU78 | 614  | IYGGLTSK(*)VQESLK(*)          | K8  | 45.5  | 102.87 | 1.0449438 | 0.692307 | 0.853932    | 0.863728  |
| Pdcd6ip | Q9WU78 | 690  | FQNK(*)C(+57.02)SDIVFAR(*)    | K4  | 25.91 | 1000   | -         | 1.653846 | 1.179775    | 1.4168107 |
| Pdcd6ip | Q9WU78 | 640  | MK(*)QSNNEANLR(*)             | K2  | 10.13 | 1000   | -         | -        | 1.08988764  |           |
| Farsb   | Q9WUA2 | 208  | TDNHLK(*)HYLHIIESK(*)         | K6  | 71.49 | 159.26 | 0.9326923 | 0.911392 | 0.967032    | 0.9370392 |
| Farsb   | Q9WUA2 | 443  | AVHISNPK(*)TAEFQVAR(*)        | K8  | 57.64 | 1000   | 0.9134615 | 0.822784 | 0.868131    | 0.8681261 |
| Farsb   | Q9WUA2 | 202  | EYTAC(+57.02)ELMNIYK(*)TDNHLK | K12 | 53.56 | 41.94  | -         | -        | 0.879120879 |           |
| Farsb   | Q9WUA2 | 492  | DVGAK(*)NYR(*)                | K5  | 37.53 | 1000   | -         | -        | 0.747252747 |           |
| Farsb   | Q9WUA2 | 190  | TK(*)EYTAC(+57.02)ELMNIYK(*)  | K2  | 22.77 | 218.12 | 1.8269230 | 1.556962 | 1.208791    | 1.5308921 |
| Pfkip   | Q9WUA3 | 293  | ELVVK(*)NLGFDTR(*)            | K5  | 56.15 | 1000   | 0.9647058 | -        | 1.011494    | 0.9881001 |
| Stub1   | Q9WUD1 | 204  | AQQAC(+57.02)IEAK(*)HDK(*)    | K9  | 75.91 | 49.37  | 0.9537037 | -        | 0.881720    | 0.9177121 |
| Rfc2    | Q9WUK4 | 158  | TMEIYSK(*)TTR(*)              | K7  | 36.39 | 1000   | 1.4626865 | 0.785714 | 0.706521    | 0.9849742 |
| Arl3    | Q9WUL7 | 30   | ILLGLDNAGK(*)TTLLK(*)         | K11 | 52.55 | 87.95  | 1.0707070 | 1.405405 | 0.880434    | 1.1188491 |
| Arl3    | Q9WUL7 | 54   | QLASEDISHITPTQGFNIK(*)SVQSQGF | K19 | 5.2   | 32.94  | -         | -        | 1.358695652 |           |
| Coro1b  | Q9WUM3 | 339  | FYK(*)LHER(*)                 | K3  | 36.37 | 1000   | 0.9010989 | 1.094594 | -           | 0.9978467 |
| Coro1b  | Q9WUM3 | 21   | HVFGQPVK(*)NDQC(+57.02)YEDIR  | K8  | 21.87 | 1000   | -         | -        | 1.283950617 |           |
| Coro1c  | Q9WUM4 | 19   | HVFGQAVK(*)NDQC(+57.02)YDDIR  | K8  | 80.57 | 1000   | 0.8260869 | 0.6375   | 0.864583    | 0.7760568 |

|         |        |     |                                 |     |       |        |           |          |             |             |
|---------|--------|-----|---------------------------------|-----|-------|--------|-----------|----------|-------------|-------------|
| Coro1c  | Q9WUM4 | 391 | NADPILISLK(*)HGYIPGK(*)         | K10 | 42.84 | 21.15  | 0.7608695 | 1.2625   | 0.739583    | 0.9209843   |
| Coro1c  | Q9WUM4 | 337 | FFK(*)LHER(*)                   | K3  | 14.12 | 1000   | -         | 1.725    | 1.177083    | 1.4510417   |
| Suc1g1  | Q9WUM5 | 57  | NTK(*)IIC(+57.02)QGFTGK(*)      | K3  | 85.49 | 143.22 | 0.7553191 | 0.756410 | -           | 0.7558647   |
| Suc1g1  | Q9WUM5 | 94  | GGQK(*)HLGLPVFNTVK(*)           | K4  | 71.11 | 215.31 | 0.7872340 | 0.692307 | 0.931818    | 0.8037866   |
| Suc1g1  | Q9WUM5 | 66  | IIC(+57.02)QGFTGK(*)QGTfHSQQA   | K9  | 12.86 | 25.39  | -         | -        | -           | 1.306818182 |
| Uchl5   | Q9WUP7 | 282 | YK(*)IENIR(*)                   | K2  | 27.04 | 1000   | -         | -        | -           | 1.054945055 |
| Preb    | Q9WUQ2 | 24  | IDPK(*)TGLLIAAGGGGAAG(*)        | K4  | 18.94 | 32.15  | -         | -        | -           | 0.608247423 |
| Eci2    | Q9WUR2 | 90  | AK(*)WDAWNALGSLPK(*)            | K2  | 52.9  | 126.69 | 1.2758620 | -        | -           | -           |
| RbmX    | Q9WV02 | 72  | DMNGK(*)SLDGK(*)                | K5  | 39.82 | 43.82  | -         | -        | -           | -           |
| RbmX    | Q9WV02 | 80  | AIK(*)VEQATK(*)PSFESGR(*)       | K3  | 28.33 | 151.86 | -         | 0.541353 | -           | -           |
| Fam50a  | Q9WV03 | 316 | NK(*)HIFPASR(*)                 | K2  | 77.03 | 1000   | 0.2659574 | -        | 0.25        | 0.2579787   |
| Fam50a  | Q9WV03 | 275 | GK(*)SGPLFNFDVHDDVR(*)          | K2  | 28.33 | 1000   | 1.0851063 | 2.212765 | 0.619047    | 1.30564     |
| Fam50a  | Q9WV03 | 271 | EDLIIPHHSFYDFIVTK(*)AR(*)       | K18 | 13.69 | 1000   | -         | -        | 1.25        | -           |
| Arpc1b  | Q9WV32 | 326 | ASSEGGAATGAGLDSLHK(*)NSVSQIS    | K18 | 81.79 | 49.25  | 1.3043478 | 1.098591 | 1.047619    | 1.1501861   |
| Arpc1b  | Q9WV32 | 44  | WNK(*)VHELK(*)                  | K3  | 78.67 | 127.18 | 1.5543478 | 0.661971 | 1.369047    | 1.1951224   |
| Arpc1b  | Q9WV32 | 82  | NAYVWTLK(*)GR(*)                | K8  | 72.8  | 1000   | 1.1521739 | 0.830985 | 1.035714    | 1.0062914   |
| Asah1   | Q9WV54 | 309 | ESLDVYELDPK(*)HGR(*)            | K11 | 69.34 | 1000   | 1.0652173 | 0.987179 | 1.022727    | 1.0250414   |
| Asah1   | Q9WV54 | 324 | WK(*)NTLFIDDR(*)                | K2  | 47.13 | 1000   | 4.3586956 | -        | -           | -           |
| Asah1   | Q9WV54 | 309 | K(*)ESLDVYELDPK(*)HGR(*)        | K12 | 31.02 | 215.31 | 1.0434782 | 1.435897 | 1.125       | 1.2014586   |
| Vapa    | Q9WV55 | 125 | EAK(*)PDELMDSK(*)LR(*)          | K11 | 73.75 | 150.63 | 0.6629213 | 0.513888 | 0.985074    | 0.7206283   |
| Vapa    | Q9WV55 | 10  | A(+42.01)SASGAMAK(*)HEQILVLDP   | K9  | 61.07 | 121.81 | 0.8651685 | -        | 1.149253    | 1.0072111   |
| Vapa    | Q9WV55 | 26  | FK(*)GPFTDVVTNLK(*)             | K2  | 47.63 | 183.14 | 0.6179775 | -        | 1.402985    | 1.0104813   |
| Snx1    | Q9WV80 | 490 | SK(*)DFK(*)NHVMK(*)             | K5  | 38.62 | 68.31  | -         | -        | 1.088888889 | -           |
| Snx1    | Q9WV80 | 290 | MFNK(*)ATDAVSK(*)               | K4  | 36.59 | 74.72  | -         | 0.658536 | 0.655555    | 0.6570461   |
| Snx1    | Q9WV80 | 490 | DFK(*)NHVMK(*)                  | K3  | 19.92 | 119.54 | 0.9611650 | -        | -           | -           |
| Epb41l3 | Q9WV92 | 146 | GQVLFDK(*)VC(+57.02)EHLNLLEK(*) | K7  | 57.15 | 43.7   | -         | -        | 0.89010989  | -           |
| Epb41l3 | Q9WV92 | 386 | LWK(*)VC(+57.02)VEHHTFFR(*)     | K3  | 47.91 | 1000   | -         | -        | 1.164835    | 1.165       |
| Epb41l3 | Q9WV92 | 280 | VIELHK(*)SHR(*)                 | K6  | 23.76 | 1000   | -         | 1.081081 | 1           | 1.0405405   |
| Epb41l3 | Q9WV92 | 785 | TSEGLEQK(*)SHFESSTVR(*)         | K8  | 9.17  | 1000   | -         | -        | 1.274725    | 1.275       |
| Epb41l3 | Q9WV92 | 569 | TQDELMK(*)HQTNISELK(*)          | K7  | 7.04  | 27.52  | -         | 2.337837 | -           | -           |
| Phlda3  | Q9WV95 | 104 | FK(*)NQQAQITVR(*)               | K2  | 31.98 | 1000   | -         | 0.175324 | 0.729729    | 0.4525272   |
| Tagln2  | Q9WVA4 | 171 | NFSDNQLQEGK(*)NVIGLQMGTNR(*)    | K11 | 72.09 | 1000   | 0.9494949 | -        | 0.956989    | 0.9532421   |
| Tagln2  | Q9WVA4 | 54  | ENFQK(*)WLK(*)                  | K5  | 52.81 | 42.6   | 0.7878787 | 0.814814 | 0.860215    | 0.8209696   |
| Pacsin2 | Q9WVE8 | 122 | EAFHK(*)QMMGGFK(*)              | K5  | 48.71 | 115.21 | 1.0222222 | 0.8      | 1.058139    | 0.9601206   |

|         |        |      |                                      |     |       |        |           |          |          |           |
|---------|--------|------|--------------------------------------|-----|-------|--------|-----------|----------|----------|-----------|
| Pacsin2 | Q9WVE8 | 264  | HLDSLNVASYK(*)TIYR(*)                | K11 | 45.23 | 1000   | 0.7666666 | 1.125    | 0.860465 | 0.9173773 |
| Foxo3   | Q9WVH4 | 241  | SSWWIINPDG GK(*)SGK(*)               | K12 | 77.39 | 24.24  | 0.3742690 | 0.544642 | 0.704081 | 0.5409978 |
| Psm13   | Q9WVJ2 | 105  | VK(*)SSDEAVILC(+57.02)K(*)           | K2  | 78.12 | 228.69 | 0.9278350 | 0.890243 | 0.927835 | 0.9153047 |
| Psm13   | Q9WVJ2 | 306  | ITV NK(*)VELLVMK(*)                  | K5  | 68.73 | 136.94 | 0.8556701 | 0.817073 | 0.907216 | 0.8599866 |
| Psm13   | Q9WVJ2 | 115  | SSDEAVILC(+57.02)K(*)TAIGALK(*)      | K10 | 68.15 | 110.43 | -         | 0.792682 | 0.804123 | 0.7984033 |
| Psm13   | Q9WVJ2 | 298  | QLTFEEIAK(*)SAK(*)                   | K9  | 66.85 | 20.75  | 0.7216494 | 0.719512 | 0.938144 | 0.793102  |
| Ehd1    | Q9WVK4 | 220  | VVLNK(*)ADQIETQQLMR(*)               | K5  | 90.47 | 1000   | 0.8888888 | 0.8375   | 0.977528 | 0.9013057 |
| Ehd1    | Q9WVK4 | 208  | ALK(*)NHEDK(*)                       | K3  | 75.09 | 115.97 | 1.0666666 | -        | 0.943820 | 1.0052434 |
| Racgap1 | Q9WVM1 | 249  | GK(*)SGPLQPVNSDSALNSR(*)             | K2  | 70    | 1000   | 0.7956989 | 0.578947 | 0.853658 | 0.7427683 |
| Fxr2    | Q9WVR4 | 217  | NEEATK(*)HLETSK(*)                   | K6  | 55.85 | 90.32  | -         | -        | 0.930693 | 0.9069    |
| Mapk7   | Q9WVS8 | 35   | AEPVHTAASVVAK(*)NLALLK(*)            | K13 | 66.59 | 102.87 | 0.1636615 | -        | 1.136363 | 0.6500126 |
| Rad9a   | Q9Z0F6 | 2    | MK(*)C(+57.02)LITGGNVK(*)            | K2  | 60.85 | 123.34 | -         | -        | -        | -         |
| Clip2   | Q9Z0H8 | 232  | VLVGGTK(*)TGVVR(*)                   | K7  | 19.56 | 1000   | 0.6603773 | 1.054945 | 1.021052 | 0.912125  |
| Clip2   | Q9Z0H8 | 365  | EK(*)QQHIEQLLAER(*)                  | K2  | 18.66 | 1000   | -         | 1.131868 | 0.526315 | 0.829092  |
| Npc2    | Q9Z0J0 | 116  | LPVK(*)NEYPSIK(*)                    | K4  | 84.48 | 98     | 1.0238095 | 0.916666 | 1.0125   | 0.9843254 |
| Npc2    | Q9Z0J0 | 105  | DK(*)VYSYLNK(*)                      | K2  | 65.95 | 136.94 | -         | -        | 0.85     | -         |
| Eif2s3x | Q9Z0N1 | 183  | LK(*)HILILQNK(*)                     | K2  | 92.26 | 242.89 | 1.0329670 | 0.8125   | 0.967391 | 0.9376194 |
| Eif2s3x | Q9Z0N1 | 70   | FK(*)NELER(*)                        | K2  | 87.9  | 1000   | 1.0549450 | 0.825    | 0.934782 | 0.9382426 |
| Eif2s3x | Q9Z0N1 | 421  | VSAVK(*)ADLGK(*)                     | K5  | 82.23 | 87.95  | 1.2967032 | 0.9125   | 1.097826 | 1.1023431 |
| Eif2s3x | Q9Z0N1 | 449  | R(*)VEK(*)HWR(*)                     | K4  | 67.02 | 1000   | 1.2087912 | 1.1      | 1.195652 | 1.1681478 |
| Eif2s3x | Q9Z0N1 | 191  | HILILQNK(*)IDLVK(*)                  | K8  | 62.81 | 107.29 | 0.8571428 | 0.7625   | 0.934782 | 0.8514752 |
| Eif2s3x | Q9Z0N1 | 90   | IYK(*)LDDPSC(+57.02)PR(*)PEC(+57.02) | K3  | 8.79  | 1000   | -         | 1.2125   | -        | -         |
| Twf2    | Q9Z0P5 | 136  | DDLFLAGYQK(*)HLSSC(+57.02)AAP        | K10 | 48.26 | 1000   | -         | -        | 1        | -         |
| Fads2   | Q9Z0R9 | 409  | SLC(+57.02)AK(*)HGIEYQEK(*)PLLR      | K5  | 83.8  | 170.86 | 0.7872340 | 0.675324 | 0.879120 | 0.7805599 |
| Fads2   | Q9Z0R9 | 105  | GK(*)SSQITEDFR(*)                    | K2  | 59.66 | 1000   | -         | 0.610389 | 0.934065 | 0.7722278 |
| Fads2   | Q9Z0R9 | 404  | IAPLVK(*)SLC(+57.02)AK(*)            | K6  | 53.82 | 38.19  | 1.5319148 | 0.558441 | 1.142857 | 1.0777379 |
| Fads2   | Q9Z0R9 | 28   | WEEIQK(*)HNLR(*)                     | K6  | 45.92 | 1000   | 0.7978723 | -        | 0.857142 | 0.8275076 |
| Fads2   | Q9Z0R9 | 409  | SLC(+57.02)AK(*)HGIEYQEK(*)          | K5  | 24.15 | 66.1   | -         | -        | 1.142857 | 1.143     |
| Fads2   | Q9Z0R9 | 206  | LK(*)GASANWWNHR(*)                   | K2  | 23.21 | 1000   | 0.5106382 | 1.025974 | -        | 0.7683062 |
| Bpnt1   | Q9Z0S1 | 49   | TSATDLQTK(*)ADR(*)                   | K9  | 64.96 | 1000   | 0.6597938 | -        | 0.714285 | 0.6870398 |
| Bpnt1   | Q9Z0S1 | 277  | EVK(*)HMNSAGVLAALR(*)                | K3  | 49.17 | 1000   | 1.0206185 | -        | 1.020408 | 1.0205134 |
| Tjp2    | Q9Z0U1 | 1090 | IEIAQK(*)HPDIYAVPIK(*)               | K6  | 39.42 | 47.27  | 1.2164948 | -        | 0.567010 | 0.8917526 |
| Tjp2    | Q9Z0U1 | 769  | QIEQDK(*)HALLDVTPK(*)                | K7  | 29.29 | 43     | -         | -        | 0.649484 | 0.536     |
| Aifm1   | Q9Z0X1 | 517  | ATAQDNPK(*)SATEQSGTGIR(*)            | K8  | 19.26 | 1000   | 1.5555555 | 1.453488 | 1.103448 | 1.3708307 |



|          |        |     |                                        |     |       |        |           |          |                     |           |
|----------|--------|-----|----------------------------------------|-----|-------|--------|-----------|----------|---------------------|-----------|
| Dctn3    | Q9Z0Y1 | 156 | ALLEGYNK(*)TTMLLSK(*)                  | K8  | 22.15 | 83.89  | 1.7444444 | -        | -                   |           |
| Mettl1   | Q9Z120 | 137 | SNAMK(*)HLPNFFR(*)                     | K5  | 37.59 | 1000   | 1.2045454 | -        | -                   |           |
| Hnrnpdl  | Q9Z130 | 61  | FGEVDC(+57.02)TIK(*)TDPVTGR(*)         | K10 | 42.42 | 1000   | 0.6767676 | -        | 0.4777777;0.5772727 |           |
| Sumo3    | Q9Z172 | 11  | EGVK(*)TENDHINLK(*)                    | K4  | 60.3  | 143.22 | 1.2888888 | 1.051282 | 1.0222222;1.1207977 |           |
| Mad2l1   | Q9Z1B5 | 108 | WQFDIEC(+57.02)DK(*)TAK(*)             | K9  | 55.62 | 29.32  | 0.9072164 | 0.876404 | 1.021505;0.9350421  |           |
| Mad2l1   | Q9Z1B5 | 192 | SFTTTIHK(*)VNSMVAYK(*)                 | K8  | 28.77 | 53.45  | -         | -        | 1.247311828         |           |
| Uba2     | Q9Z1F9 | 245 | EWAK(*)STGYDPVK(*)                     | K4  | 58.9  | 107.73 | 0.8571428 | -        | 0.637362;0.7472527  |           |
| Uba2     | Q9Z1F9 | 164 | GVTEC(+57.02)YEC(+57.02)HPK(*)         | K11 | 34.99 | 1000   | 1.5408163 | 1.316455 | 0.725274;1.1941822  |           |
| Uba2     | Q9Z1F9 | 257 | LFTK(*)LFK(*)                          | K4  | 30.02 | 68.47  | 1.0816326 | 0.734177 | 0.956043;0.9239513  |           |
| Uba2     | Q9Z1F9 | 271 | YLLTMDK(*)LWR(*)                       | K7  | 22.14 | 1000   | -         | -        | 1.142857143         |           |
| Atp6v1c1 | Q9Z1G3 | 119 | QSLK(*)NISEIIAK(*)                     | K4  | 26.2  | 124.34 | -         | 1.6625   | 0.786516;1.2245084  |           |
| Arih1    | Q9Z1K5 | 255 | LK(*)YQHLITNSFVEC(+57.02)NR(*)         | K2  | 18.33 | 1000   | 2.6506024 | -        | 1.825581;2.2380919  |           |
| Rps6kb2  | Q9Z1M4 | 80  | GGYGK(*)VFQVR(*)                       | K5  | 15.03 | 1000   | -         | -        | 0.546296296         |           |
| Ddx39b   | Q9Z1N5 | 188 | SLNLK(*)HIK(*)                         | K5  | 96.62 | 68.47  | 0.9887640 | 0.842105 | 0.923076;0.9179821  |           |
| Ddx39b   | Q9Z1N5 | 53  | DFLLK(*)PELLR(*)                       | K5  | 84.32 | 1000   | 0.6966292 | 0.828947 | 0.934065;0.8198808  |           |
| Ddx39b   | Q9Z1N5 | 191 | HIK(*)HFILDEC(+57.02)DK(*)             | K3  | 83.67 | 184.54 | 1.0561797 | 0.868421 | 0.945054;0.9565519  |           |
| Ddx39b   | Q9Z1N5 | 36  | K(*)DVK(*)GSYVSIHSSGFR(*)              | K4  | 79.82 | 44.44  | 1.1797752 | 0.723684 | 0.945054;0.9495048  |           |
| Ddx39b   | Q9Z1N5 | 36  | DVK(*)GSYVSIHSSGFR(*)                  | K3  | 78.19 | 1000   | 1.1685393 | 1.078947 | 0.967032;1.0715066  |           |
| Ddx39b   | Q9Z1N5 | 183 | NK(*)SLNLK(*)                          | K2  | 70.11 | 100.21 | 0.8426966 | 1.078947 | -                   | 0.960822  |
| Clic1    | Q9Z1Q5 | 119 | IK(*)NSNPALNDNLEK(*)                   | K2  | 81.78 | 264.82 | 0.9042553 | 0.833333 | 0.852272;0.8632871  |           |
| Vars     | Q9Z1Q9 | 951 | HFC(+57.02)NK(*)LWNATK(*)              | K5  | 90.75 | 113.99 | 0.8681318 | 0.815789 | 0.967741;0.8838878  |           |
| Vars     | Q9Z1Q9 | 551 | IETMLGDVAVAVHPK(*)DPR(*)               | K15 | 23.98 | 1000   | -         | 1.118421 | -                   |           |
| Ap3b1    | Q9Z1T1 | 338 | SEAGVISK(*)SLVR(*)                     | K8  | 69.94 | 1000   | 0.7368421 | 1.302631 | 0.770833;0.936769   |           |
| Ap3b1    | Q9Z1T1 | 90  | NVASK(*)NIEIK(*)                       | K5  | 60.98 | 77.53  | 0.8421052 | 0.697368 | 0.833333;0.7909357  |           |
| Ap3b1    | Q9Z1T1 | 524 | MAK(*)SFTSEDDLVK(*)                    | K3  | 36.1  | 137.5  | 1.0947368 | 1.657894 | 0.958333;1.2369883  |           |
| Ap3b1    | Q9Z1T1 | 85  | NASELPAVVK(*)NVASK(*)                  | K11 | 29.11 | 29.96  | 1         | 0.618421 | -                   | 0.8092105 |
| Ilf3     | Q9Z1X4 | 224 | ANGLK(*)SC(+57.02)VIVIR(*)             | K5  | 44.3  | 1000   | 1.0537634 | 1.408450 | 1.329545;1.2639199  |           |
| Ilf3     | Q9Z1X4 | 17  | HVMAK(*)HSSVYPTQEELEAVQNMV             | K5  | 32.03 | 1000   | 1.7741935 | -        | 1.284090;1.5291422  |           |
| Uso1     | Q9Z1Z0 | 586 | LGFISK(*)HELYSR(*)                     | K6  | 46.1  | 1000   | -         | -        | 1.086956522         |           |
| Uso1     | Q9Z1Z0 | 842 | SVPVEGESEHVSAAK(*)TTDVEGR(*)           | K15 | 41.06 | 1000   | -         | -        | 1.02173913          |           |
| Strap    | Q9Z1Z2 | 104 | HIVK(*)TVDFTQDSNYLLTGGQDK(*)           | K4  | 60.26 | 257.92 | -         | -        | 0.381443299         |           |
| Strap    | Q9Z1Z2 | 262 | YDYNSGEELESYK(*)GHFGPIHC(+57.02)TVR(*) | K13 | 53.34 | 1000   | -         | -        | 1.06185567          |           |
| Strap    | Q9Z1Z2 | 298 | LWQTVVGK(*)TYGLWK(*)                   | K8  | 48.61 | 104.48 | 1.0824742 | -        | 1.257731;1.1701031  |           |
| Strap    | Q9Z1Z2 | 164 | QILSADDK(*)TVR(*)                      | K8  | 26.75 | 1000   | -         | -        | 0.896907216         |           |



|         |        |      |                                |     |       |        |           |          |                    |
|---------|--------|------|--------------------------------|-----|-------|--------|-----------|----------|--------------------|
| Strap   | Q9Z1Z2 | 249  | LYK(*)YDYN SGEELESYK(*)        | K3  | 11.86 | 61.26  | -         | -        | 1.453608247        |
| Hnrnpc  | Q9Z204 | 170  | GK(*)SGFNSK(*)                 | K2  | 84.56 | 110.2  | -         | 0.948717 | 0.922222;0.9354701 |
| Hnrnpc  | Q9Z204 | 8    | A(+42.01)SNVTNK(*)TDPR(*)      | K7  | 79.12 | 1000   | 1.2061855 | 0.794871 | -1.0005287         |
| Hnrnpc  | Q9Z204 | 176  | SGFNSK(*)SGQR(*)               | K6  | 77.36 | 1000   | 1.0309278 | -1       | 1.0154639          |
| Hnrnpc  | Q9Z204 | 42   | YGK(*)IVGC(+57.02)SVHK(*)      | K3  | 75.04 | 183.32 | 1.2783505 | 1.371794 | 1.177777;1.2759744 |
| Hnrnpc  | Q9Z204 | 207  | QK(*)VDSLLESLEK(*)             | K2  | 65.9  | 126.68 | 0.8350515 | 0.717948 | 0.977777;0.8435927 |
| Hnrnpc  | Q9Z204 | 50   | IVGC(+57.02)SVHK(*)GFAFVQYVNE  | K8  | 65.76 | 1000   | 0.8969072 | 1        | 1.011111;0.9693394 |
| Hnrnpc  | Q9Z204 | 39   | K(*)SDVEAIFSK(*)YGK(*)         | K10 | 50.98 | 24.24  | 1.3402061 | 1.730769 | 1.177777;1.4162511 |
| Hnrnpc  | Q9Z204 | 39   | SDVEAIFSK(*)YGK(*)             | K9  | 46.04 | 37.54  | -         | -        | 1.022222222        |
| Baz1b   | Q9Z277 | 502  | SALSC(+57.02)VISK(*)TAR(*)     | K9  | 83.69 | 1000   | 0.7272727 | -        | 0.797872;0.7625725 |
| Baz1b   | Q9Z277 | 964  | ANLGK(*)NASVNAHHGPALEAVETTV    | K5  | 48.43 | 69.52  | 0.7474747 | -        | 0.840425;0.7939501 |
| Baz1b   | Q9Z277 | 818  | EENVLGK(*)VDR(*)               | K7  | 47.03 | 1000   | -         | 0.586206 | -                  |
| Baz1b   | Q9Z277 | 1438 | TEQC(+57.02)LLALLQK(*)HLP GHPY | K11 | 33.91 | 1000   | -         | -        | 0.79787234         |
| Baz1b   | Q9Z277 | 410  | GK(*)GILNGQK(*)                | K2  | 10.81 | 85.08  | -         | 0.091954 | -                  |
| Mbd3    | Q9Z2D8 | 92   | GK(*)PDLNTALPVR(*)             | K2  | 16.98 | 1000   | 1.0747663 | -        | -                  |
| Epb4111 | Q9Z2H5 | 115  | VTLLDASEYEC(+57.02)EVEK(*)HGR( | K15 | 75.44 | 1000   | 1.1547619 | 0.784810 | 0.945054;0.9615423 |
| Epb4111 | Q9Z2H5 | 259  | IMELHK(*)TYR(*)                | K6  | 63.32 | 1000   | 1.7738095 | 1.101265 | 1.241758;1.3722779 |
| Epb4111 | Q9Z2H5 | 95   | FK(*)SAIC(+57.02)R(*)          | K2  | 42.77 | 1000   | 1.2857142 | -        | 1.087912;1.1868132 |
| Suc1g2  | Q9Z2I8 | 94   | GK(*)GVFN SGLK(*)              | K2  | 34.62 | 75.74  | -         | -        | 1.021978022        |
| Suc1g2  | Q9Z2I8 | 219  | MAENLGFLGSLK(*)NQAADQITK(*)    | K12 | 20.01 | 100.79 | -         | -        | 1.637362637        |
| Suc1g2  | Q9Z2I8 | 387  | ELELK(*)VPLVVR(*)              | K5  | 16.78 | 1000   | 1.3009708 | -        | -                  |
| Suc1a2  | Q9Z2I9 | 78   | GFVAK(*)SSDEAYAIK(*)           | K5  | 77.16 | 168.62 | 0.8936170 | 0.722891 | 0.912087;0.8428655 |
| Septin5 | Q9Z2Q6 | 90   | INQTV EILK(*)HTVDIEEK(*)       | K9  | 35.96 | 38.35  | -         | -        | 1.041666667        |
| Psma7   | Q9Z2U0 | 38   | GK(*)DIVVLGVEK(*)              | K2  | 81.98 | 225.26 | 0.9368421 | 0.986486 | 0.943820;0.9557163 |
| Psma5   | Q9Z2U1 | 196  | EAIK(*)SSLILK(*)               | K4  | 86.47 | 128.65 | 0.9787234 | 0.790123 | 0.988888;0.9192453 |
| Zfp292  | Q9Z2U2 | 1104 | TYNSSQSIGK(*)HMK(*)            | K10 | 61.88 | 62.26  | -         | 57       | -                  |
| Hnrnpf  | Q9Z2X1 | 185  | YIEVFK(*)SSQEEVR(*)            | K6  | 95.72 | 1000   | 0.8989898 | 0.846153 | 0.904255;0.883133  |
| Hnrnpf  | Q9Z2X1 | 98   | TEMDWVLK(*)HSGPNSADSANDGFV     | K8  | 94.99 | 1000   | 1.1010101 | 0.807692 | 0.914893;0.9411987 |
| Hnrnpf  | Q9Z2X1 | 87   | YIEVFK(*)SHR(*)                | K6  | 93.04 | 1000   | 1.0101010 | 0.871794 | 0.968085;0.9499937 |
| Hnrnpf  | Q9Z2X1 | 224  | YIGIVK(*)QAGLDR(*)             | K6  | 81.26 | 1000   | 1         | 0.756410 | 0.872340;0.8762502 |
| Psmd10  | Q9Z2X2 | 30   | ILADK(*)SLATR(*)               | K5  | 19.23 | 1000   | -         | 0.736842 | 0.843373;0.7901078 |
| Plpbp   | Q9Z2Y8 | 125  | LADK(*)VNSSWQK(*)              | K4  | 79.87 | 144.88 | 1.0638297 | 0.730337 | 0.896551;0.8969062 |
| Plpbp   | Q9Z2Y8 | 99   | WHFIGHLQK(*)QNVNK(*)           | K9  | 12.42 | 39.44  | -         | 1.022471 | -                  |
| Sart1   | Q9Z315 | 672  | APNK(*)SLPSAVYC(+57.02)IEDK(*) | K4  | 83.56 | 138.85 | 1.1860465 | 0.592105 | 0.911392;0.8965147 |

|       |        |     |                         |    |       |        |             |   |
|-------|--------|-----|-------------------------|----|-------|--------|-------------|---|
| Sart1 | Q9Z315 | 797 | IVLSGSGK(*)SMNANTITK(*) | K8 | 60.77 | 112.47 | 1.3488372 - | - |
|-------|--------|-----|-------------------------|----|-------|--------|-------------|---|

e
