# Supplementary material for: Quantitative Proteomics Analysis Expands the Roles of Lysine β‐Hydroxybutyrylation Pathway in Response to Environmental β‐Hydroxybutyrate
Source: Hindawi journal article supplement (doi:10.1155/2022/4592170), 2022-01-01
Supplement: f1 [file 4592170.f1.zip]

**Table S1: The identification of whole cell proteins in MEF.**

| Gene name | UniprotID | Description                                                                                     | Ratio_average |
|-----------|-----------|-------------------------------------------------------------------------------------------------|---------------|
| Sgcb      | P82349    | Beta-sarcoglycan OS=Mus musculus OX=10090 GN=Sgcb PE=1 SV=1                                     | 0.683333333   |
| Jund      | P15066    | Transcription factor jun-D OS=Mus musculus OX=10090 GN=Jund PE=1 SV=1                           | 0.876666667   |
| Tmem14c   | Q9CQN6    | Transmembrane protein 14C OS=Mus musculus OX=10090 GN=Tmem14c PE=1 SV=1                         | 0.886666667   |
| Snrpe     | P62305    | Small nuclear ribonucleoprotein E OS=Mus musculus OX=10090 GN=Snrpe PE=1 SV=1                   | 0.913333333   |
| G6pc3     | Q6NSQ9    | Glucose-6-phosphatase 3 OS=Mus musculus OX=10090 GN=G6pc3 PE=1 SV=1                             | 0.85          |
| Slc25a22  | Q9D6M3    | Mitochondrial glutamate carrier 1 OS=Mus musculus OX=10090 GN=Slc25a22 PE=1 SV=1                | 0.983333333   |
| Prorsd1   | Q9D820    | Prolyl-tRNA synthetase associated domain-containing protein 1 OS=Mus musculus OX=10090 GN=P     | 0.85          |
| Men1      | O88559    | Menin OS=Mus musculus OX=10090 GN=Men1 PE=1 SV=2                                                | 1.073333333   |
| Fancd2    | Q80V62    | Fanconi anemia group D2 protein homolog OS=Mus musculus OX=10090 GN=Fancd2 PE=1 SV=2            |               |
|           | Q8BR90    | UPF0600 protein C5orf51 homolog OS=Mus musculus OX=10090 PE=1 SV=1                              |               |
| Jam3      | Q9D8B7    | Junctional adhesion molecule C OS=Mus musculus OX=10090 GN=Jam3 PE=1 SV=2                       | 0.826666667   |
| Camsap1   | A2AHC3    | Calmodulin-regulated spectrin-associated protein 1 OS=Mus musculus OX=10090 GN=Camsap1 PE=      | 0.81          |
| Eml3      | Q8VC03    | Echinoderm microtubule-associated protein-like 3 OS=Mus musculus OX=10090 GN=Eml3 PE=1 SV=      |               |
| Srek1     | Q8BZX4    | Splicing regulatory glutamine/lysine-rich protein 1 OS=Mus musculus OX=10090 GN=Srek1 PE=2 SV   | 1.273333333   |
| Mfsd10    | Q9D2V8    | Major facilitator superfamily domain-containing protein 10 OS=Mus musculus OX=10090 GN=Mfsd     | 0.946666667   |
| Htra1     | Q9R118    | Serine protease HTRA1 OS=Mus musculus OX=10090 GN=Htra1 PE=1 SV=2                               | 1.636666667   |
| Serpib8   | O08800    | Serpin B8 OS=Mus musculus OX=10090 GN=Serpib8 PE=1 SV=2                                         |               |
| Phc1      | Q64028    | Polyhomeotic-like protein 1 OS=Mus musculus OX=10090 GN=Phc1 PE=1 SV=2                          | 0.08          |
| Gxylt1    | Q3UHH8    | Glucoside xylosyltransferase 1 OS=Mus musculus OX=10090 GN=Gxylt1 PE=1 SV=2                     |               |
| Col11a1   | Q61245    | Collagen alpha-1(XI) chain OS=Mus musculus OX=10090 GN=Col11a1 PE=1 SV=2                        |               |
| Elovl1    | Q9JLJ5    | Elongation of very long chain fatty acids protein 1 OS=Mus musculus OX=10090 GN=Elovl1 PE=1 SV= |               |
| Ythdc1    | E9Q5K9    | YTH domain-containing protein 1 OS=Mus musculus OX=10090 GN=Ythdc1 PE=1 SV=2                    | 0.723333333   |
| Sirt1     | Q923E4    | NAD-dependent protein deacetylase sirtuin-1 OS=Mus musculus OX=10090 GN=Sirt1 PE=1 SV=2         |               |
| Bloc1s3   | Q5U5M8    | Biogenesis of lysosome-related organelles complex 1 subunit 3 OS=Mus musculus OX=10090 GN=Bl    | 0.423333333   |
| Lsm5      | P62322    | U6 snRNA-associated Sm-like protein LSm5 OS=Mus musculus OX=10090 GN=Lsm5 PE=3 SV=2             | 0.826666667   |
| Ss18      | Q62280    | Protein SSXT OS=Mus musculus OX=10090 GN=Ss18 PE=1 SV=2                                         | 0.926666667   |
| Fbxo11    | Q7TPD1    | F-box only protein 11 OS=Mus musculus OX=10090 GN=Fbxo11 PE=1 SV=3                              | 1.59          |
| Jun       | P05627    | Transcription factor AP-1 OS=Mus musculus OX=10090 GN=Jun PE=1 SV=3                             | 0.2           |
| Ltbp2     | O08999    | Latent-transforming growth factor beta-binding protein 2 OS=Mus musculus OX=10090 GN=Ltbp2      |               |
| Wdr13     | Q91V09    | WD repeat-containing protein 13 OS=Mus musculus OX=10090 GN=Wdr13 PE=1 SV=1                     | 1.405         |
| Pmm1      | O35621    | Phosphomannomutase 1 OS=Mus musculus OX=10090 GN=Pmm1 PE=1 SV=1                                 | 0.805         |

|          |        |                                                                                                  |             |
|----------|--------|--------------------------------------------------------------------------------------------------|-------------|
| Lamtor2  | Q9JHS3 | Ragulator complex protein LAMTOR2 OS=Mus musculus OX=10090 GN=Lamtor2 PE=1 SV=1                  | 0.773333333 |
| Zfyve27  | Q3TXX3 | Protrudin OS=Mus musculus OX=10090 GN=Zfyve27 PE=1 SV=2                                          |             |
| Ppox     | P51175 | Protoporphyrinogen oxidase OS=Mus musculus OX=10090 GN=Ppox PE=1 SV=1                            | 0.776666667 |
| Brms1l   | Q3U1T3 | Breast cancer metastasis-suppressor 1-like protein OS=Mus musculus OX=10090 GN=Brms1l PE=2 SV=1  |             |
| Gmeb2    | P58929 | Glucocorticoid modulatory element-binding protein 2 OS=Mus musculus OX=10090 GN=Gmeb2 PE=1.33    |             |
| Tcaf1    | Q8BNE1 | TRPM8 channel-associated factor 1 OS=Mus musculus OX=10090 GN=Tcaf1 PE=2 SV=1                    |             |
| Stx2     | Q00262 | Syntaxin-2 OS=Mus musculus OX=10090 GN=Stx2 PE=1 SV=1                                            |             |
| Prpf18   | Q8BM39 | Pre-mRNA-splicing factor 18 OS=Mus musculus OX=10090 GN=Prpf18 PE=1 SV=1                         | 2.775       |
| Ptprs    | B0V2N1 | Receptor-type tyrosine-protein phosphatase 5 OS=Mus musculus OX=10090 GN=Ptprs PE=1 SV=1         |             |
| Tmem126b | Q9D1R1 | Complex I assembly factor TMEM126B mitochondrial OS=Mus musculus OX=10090 GN=Tmem126b PE=1.19    |             |
| Ccm2     | Q8K2Y9 | Cerebral cavernous malformations protein 2 homolog OS=Mus musculus OX=10090 GN=Ccm2 PE=1 SV=1    | 0.94        |
| Fbln5    | Q9WVH9 | Fibulin-5 OS=Mus musculus OX=10090 GN=Fbln5 PE=1 SV=1                                            | 0.843333333 |
| Ccdc186  | Q8C9S4 | Coiled-coil domain-containing protein 186 OS=Mus musculus OX=10090 GN=Ccdc186 PE=1 SV=2          | 1.61        |
| Kansl2   | Q8BQR4 | KAT8 regulatory NSL complex subunit 2 OS=Mus musculus OX=10090 GN=Kansl2 PE=1 SV=1               |             |
| Chrac1   | Q9JKP8 | Chromatin accessibility complex protein 1 OS=Mus musculus OX=10090 GN=Chrac1 PE=1 SV=1           | 0.82        |
| Ints8    | Q80V86 | Integrator complex subunit 8 OS=Mus musculus OX=10090 GN=Ints8 PE=1 SV=1                         | 0.866666667 |
| Aifm2    | Q8BUE4 | Ferroptosis suppressor protein 1 OS=Mus musculus OX=10090 GN=Aifm2 PE=1 SV=1                     | 1.035       |
|          | Q9D2X8 | Uncharacterized protein C8orf76 homolog OS=Mus musculus OX=10090 GN=Q9D2X8 PE=1 SV=1             |             |
| Plp2     | Q9R1Q7 | Proteolipid protein 2 OS=Mus musculus OX=10090 GN=Plp2 PE=1 SV=1                                 | 1.036666667 |
| Tfb2m    | Q3TL26 | Dimethyladenosine transferase 2 mitochondrial OS=Mus musculus OX=10090 GN=Tfb2m PE=2 SV=1        |             |
| Herc2    | Q4U2R1 | E3 ubiquitin-protein ligase HERC2 OS=Mus musculus OX=10090 GN=Herc2 PE=1 SV=3                    | 0.5         |
| Hacd2    | Q9D3B1 | Very-long-chain (3R)-3-hydroxyacyl-CoA dehydratase 2 OS=Mus musculus OX=10090 GN=Hacd2 PE=1 SV=1 | 0.95        |
| Cfap410  | Q8C6G1 | Cilia- and flagella-associated protein 410 OS=Mus musculus OX=10090 GN=Cfap410 PE=1 SV=1         |             |
| Wdr73    | Q9CWR1 | WD repeat-containing protein 73 OS=Mus musculus OX=10090 GN=Wdr73 PE=1 SV=1                      |             |
| Srxn1    | Q9D975 | Sulfiredoxin-1 OS=Mus musculus OX=10090 GN=Srxn1 PE=2 SV=1                                       | 0.855       |
| Znf740   | Q6NZQ6 | Zinc finger protein 740 OS=Mus musculus OX=10090 GN=Znf740 PE=1 SV=1                             | 1           |
| Kdelr3   | Q8R1L4 | ER lumen protein-retaining receptor 3 OS=Mus musculus OX=10090 GN=Kdelr3 PE=1 SV=1               |             |
| Ect2     | Q07139 | Protein ECT2 OS=Mus musculus OX=10090 GN=Ect2 PE=1 SV=2                                          |             |
| Styk1    | Q6J9G1 | Tyrosine-protein kinase STYK1 OS=Mus musculus OX=10090 GN=Styk1 PE=2 SV=2                        |             |
| Pgghg    | Q8BP56 | Protein-glucosylgalactosylhydroxylysine glucosidase OS=Mus musculus OX=10090 GN=Pgghg PE=1 SV=1  |             |
| Fbxl15   | Q91W61 | F-box/LRR-repeat protein 15 OS=Mus musculus OX=10090 GN=Fbxl15 PE=1 SV=2                         | 0.99        |
| Helb     | Q6NVF4 | DNA helicase B OS=Mus musculus OX=10090 GN=Helb PE=1 SV=2                                        | 1.12        |
| Tpst2    | O88856 | Protein-tyrosine sulfotransferase 2 OS=Mus musculus OX=10090 GN=Tpst2 PE=1 SV=1                  |             |
|          | Q3U6N9 | UPF0488 protein C8orf33 homolog OS=Mus musculus OX=10090 GN=Q3U6N9 PE=2 SV=1                     | 1.063333333 |

|          |        |                                                                                                                  |             |
|----------|--------|------------------------------------------------------------------------------------------------------------------|-------------|
| Dnajc5   | P60904 | DnaJ homolog subfamily C member 5 OS=Mus musculus OX=10090 GN=Dnajc5 PE=1 SV=1                                   | 0.863333333 |
| Mthfd2l  | D3YZG8 | Probable bifunctional methylenetetrahydrofolate dehydrogenase/cyclohydrolase 2 OS=Mus muscu                      |             |
| Ormdl1   | Q92110 | ORM1-like protein 1 OS=Mus musculus OX=10090 GN=Ormdl1 PE=2 SV=1                                                 | 0.883333333 |
| Sgo2     | Q7TSY8 | Shugoshin 2 OS=Mus musculus OX=10090 GN=Sgo2 PE=1 SV=1                                                           | 0.81        |
| Polr3e   | Q9CZT4 | DNA-directed RNA polymerase III subunit RPC5 OS=Mus musculus OX=10090 GN=Polr3e PE=1 SV=2                        |             |
| Polr2k   | Q63871 | DNA-directed RNA polymerases I II and III subunit RPABC4 OS=Mus musculus OX=10090 GN=Polr2k                      | 0.746666667 |
| Trappc9  | Q3U0M1 | Trafficking protein particle complex subunit 9 OS=Mus musculus OX=10090 GN=Trappc9 PE=1 SV=2                     | 0.74        |
| Olfml2b  | Q3V1G4 | Olfactomedin-like protein 2B OS=Mus musculus OX=10090 GN=Olfml2b PE=1 SV=2                                       |             |
| Fgfr1op  | Q66JX5 | Centrosomal protein 43 OS=Mus musculus OX=10090 GN=Cep43 PE=1 SV=1                                               | 1.835       |
| Cplx2    | P84086 | Complexin-2 OS=Mus musculus OX=10090 GN=Cplx2 PE=1 SV=1                                                          | 0.48        |
| Sec61g   | P60060 | Protein transport protein Sec61 subunit gamma OS=Mus musculus OX=10090 GN=Sec61g PE=3 SV=                        | 0.846666667 |
| Baiap2l1 | Q9DBJ3 | Brain-specific angiogenesis inhibitor 1-associated protein 2-like protein 1 OS=Mus musculus OX=10090 GN=Baiap2l1 | 1.15        |
| Mid1ip1  | Q9CQ20 | Mid1-interacting protein 1 OS=Mus musculus OX=10090 GN=Mid1ip1 PE=1 SV=1                                         | 0.725       |
| Clk3     | O35492 | Dual specificity protein kinase CLK3 OS=Mus musculus OX=10090 GN=Clk3 PE=1 SV=2                                  |             |
| Pdss2    | Q33DR3 | Decaprenyl-diphosphate synthase subunit 2 OS=Mus musculus OX=10090 GN=Pdss2 PE=1 SV=2                            | 1           |
| Wdr41    | Q3UDP0 | WD repeat-containing protein 41 OS=Mus musculus OX=10090 GN=Wdr41 PE=1 SV=1                                      | 1.273333333 |
| Pdrg1    | P59048 | p53 and DNA damage-regulated protein 1 OS=Mus musculus OX=10090 GN=Pdrg1 PE=2 SV=1                               | 0.865       |
| Trps1    | Q925H1 | Zinc finger transcription factor Trps1 OS=Mus musculus OX=10090 GN=Trps1 PE=1 SV=1                               |             |
| Selenoi  | Q80TA1 | Ethanolaminephosphotransferase 1 OS=Mus musculus OX=10090 GN=Selenoi PE=2 SV=3                                   | 0.92        |
| Supt7l   | Q9CZV5 | STAGA complex 65 subunit gamma OS=Mus musculus OX=10090 GN=Supt7l PE=1 SV=1                                      | 0.953333333 |
| Rex1bd   | Q9CYZ6 | Required for excision 1-B domain-containing protein OS=Mus musculus OX=10090 GN=Rex1bd PE=                       | 0.263333333 |
| Sfswap   | Q3USH5 | Splicing factor suppressor of white-apricot homolog OS=Mus musculus OX=10090 GN=Sfswap PE=1                      | 1.515       |
| Smrca1   | Q8BJL0 | SWI/SNF-related matrix-associated actin-dependent regulator of chromatin subfamily A-like protein                | 1.195       |
| Dnajc17  | Q91WT4 | DnaJ homolog subfamily C member 17 OS=Mus musculus OX=10090 GN=Dnajc17 PE=1 SV=2                                 | 0.685       |
| Mipep    | A6H611 | Mitochondrial intermediate peptidase OS=Mus musculus OX=10090 GN=Mipep PE=1 SV=1                                 |             |
| Uckl1    | Q91YL3 | Uridine-cytidine kinase-like 1 OS=Mus musculus OX=10090 GN=Uckl1 PE=1 SV=1                                       |             |
| Ears2    | Q9CXJ1 | Probable glutamate-tRNA ligase mitochondrial OS=Mus musculus OX=10090 GN=Ears2 PE=1 SV=1                         |             |
| Usp25    | P57080 | Ubiquitin carboxyl-terminal hydrolase 25 OS=Mus musculus OX=10090 GN=Usp25 PE=1 SV=2                             |             |
| Junb     | P09450 | Transcription factor jun-B OS=Mus musculus OX=10090 GN=Junb PE=1 SV=1                                            | 1.283333333 |
| Tmem41b  | Q8K1A5 | Transmembrane protein 41B OS=Mus musculus OX=10090 GN=Tmem41b PE=1 SV=1                                          | 0.71        |
| Mrpl52   | Q9D0Y8 | 39S ribosomal protein L52 mitochondrial OS=Mus musculus OX=10090 GN=Mrpl52 PE=1 SV=1                             | 0.933333333 |
| Cox17    | P56394 | Cytochrome c oxidase copper chaperone OS=Mus musculus OX=10090 GN=Cox17 PE=1 SV=2                                |             |
| Mgrn1    | Q9D074 | E3 ubiquitin-protein ligase MGRN1 OS=Mus musculus OX=10090 GN=Mgrn1 PE=1 SV=2                                    |             |
| Cnep1r1  | Q3UJ81 | Nuclear envelope phosphatase-regulatory subunit 1 OS=Mus musculus OX=10090 GN=Cnep1r1 PE=                        | 1.6         |

|          |        |                                                                                                              |             |
|----------|--------|--------------------------------------------------------------------------------------------------------------|-------------|
| Nrf1     | Q9WU00 | Nuclear respiratory factor 1 OS=Mus musculus OX=10090 GN=Nrf1 PE=1 SV=2                                      | 0.72        |
| Tmem199  | Q5SYH2 | Transmembrane protein 199 OS=Mus musculus OX=10090 GN=Tmem199 PE=1 SV=1                                      | 0.793333333 |
| Gc       | P21614 | Vitamin D-binding protein OS=Mus musculus OX=10090 GN=Gc PE=1 SV=2                                           | 0.033333333 |
| Zcrb1    | Q9CZ96 | Zinc finger CCHC-type and RNA-binding motif-containing protein 1 OS=Mus musculus OX=10090 GN=Zcrb1 PE=1 SV=1 | 1.065       |
| Cfb      | P04186 | Complement factor B OS=Mus musculus OX=10090 GN=Cfb PE=1 SV=2                                                | 0.213333333 |
| Tmem256  | Q5F285 | Transmembrane protein 256 OS=Mus musculus OX=10090 GN=Tmem256 PE=1 SV=1                                      | 0.735       |
| Mpg      | Q04841 | DNA-3-methyladenine glycosylase OS=Mus musculus OX=10090 GN=Mpg PE=2 SV=3                                    | 1.69        |
| Zdhhc13  | Q9CWU2 | Palmitoyltransferase ZDHHC13 OS=Mus musculus OX=10090 GN=Zdhhc13 PE=1 SV=2                                   | 1.155       |
| Ntrk3    | Q6VNS1 | NT-3 growth factor receptor OS=Mus musculus OX=10090 GN=Ntrk3 PE=1 SV=1                                      |             |
| Osbpl5   | Q9ER64 | Oxysterol-binding protein-related protein 5 OS=Mus musculus OX=10090 GN=Osbpl5 PE=1 SV=3                     |             |
| Tnfaip8  | Q921Z5 | Tumor necrosis factor alpha-induced protein 8 OS=Mus musculus OX=10090 GN=Tnfaip8 PE=1 SV=1                  | 0.47        |
| Gemin8   | Q8BHE1 | Gem-associated protein 8 OS=Mus musculus OX=10090 GN=Gemin8 PE=1 SV=1                                        |             |
| Gng5     | Q80SZ7 | Guanine nucleotide-binding protein G(I)/G(S)/G(O) subunit gamma-5 OS=Mus musculus OX=10090 GN=Gng5 PE=1 SV=1 | 0.75        |
| Higd1a   | Q9JLR9 | HIG1 domain family member 1A mitochondrial OS=Mus musculus OX=10090 GN=Higd1a PE=1 SV=1                      | 0.883333333 |
| Ammecr1l | Q8JZZ6 | AMMECR1-like protein OS=Mus musculus OX=10090 GN=Ammecr1l PE=1 SV=1                                          | 1.695       |
| Znf428   | Q8C1M2 | Zinc finger protein 428 OS=Mus musculus OX=10090 GN=Znf428 PE=1 SV=1                                         | 1.48        |
| Fez1     | Q8K0X8 | Fasciculation and elongation protein zeta-1 OS=Mus musculus OX=10090 GN=Fez1 PE=1 SV=2                       | 0.78        |
| Nepro    | Q8R2U2 | Nucleolus and neural progenitor protein OS=Mus musculus OX=10090 GN=Nepro PE=2 SV=1                          | 0.585       |
| Rabgap1l | A6H6A9 | Rab GTPase-activating protein 1-like OS=Mus musculus OX=10090 GN=Rabgap1l PE=1 SV=1                          |             |
| Pdzrn3   | Q69ZS0 | E3 ubiquitin-protein ligase PDZRN3 OS=Mus musculus OX=10090 GN=Pdzrn3 PE=1 SV=3                              |             |
| Slc35e1  | Q8CD26 | Solute carrier family 35 member E1 OS=Mus musculus OX=10090 GN=Slc35e1 PE=1 SV=2                             | 1.42        |
| Rab28    | Q99KL7 | Ras-related protein Rab-28 OS=Mus musculus OX=10090 GN=Rab28 PE=1 SV=1                                       |             |
| Mlh1     | Q9JK91 | DNA mismatch repair protein Mlh1 OS=Mus musculus OX=10090 GN=Mlh1 PE=1 SV=2                                  |             |
| Atpaf2   | Q91YY4 | ATP synthase mitochondrial F1 complex assembly factor 2 OS=Mus musculus OX=10090 GN=Atpaf2                   |             |
| Ttc28    | Q80XJ3 | Tetratricopeptide repeat protein 28 OS=Mus musculus OX=10090 GN=Ttc28 PE=1 SV=3                              |             |
| Tbc1d10b | Q8BHL3 | TBC1 domain family member 10B OS=Mus musculus OX=10090 GN=Tbc1d10b PE=1 SV=2                                 |             |
| Emc10    | Q3TAS6 | ER membrane protein complex subunit 10 OS=Mus musculus OX=10090 GN=Emc10 PE=2 SV=2                           |             |
| Myd88    | P22366 | Myeloid differentiation primary response protein MyD88 OS=Mus musculus OX=10090 GN=Myd88                     | 0.485       |
| Znf451   | Q8C0P7 | E3 SUMO-protein ligase ZNF451 OS=Mus musculus OX=10090 GN=Znf451 PE=1 SV=1                                   |             |
| Snx15    | Q91WE1 | Sorting nexin-15 OS=Mus musculus OX=10090 GN=Snx15 PE=1 SV=1                                                 |             |
| Cdc20    | Q9JJ66 | Cell division cycle protein 20 homolog OS=Mus musculus OX=10090 GN=Cdc20 PE=1 SV=2                           | 1.18        |
| Ndufaf5  | A2APY7 | Arginine-hydroxylase NDUFAF5 mitochondrial OS=Mus musculus OX=10090 GN=Ndufaf5 PE=1 SV=1                     | 0.95        |
| Abhd13   | Q80UX8 | Protein ABHD13 OS=Mus musculus OX=10090 GN=Abhd13 PE=2 SV=1                                                  |             |
| Mtif2    | Q91YJ5 | Translation initiation factor IF-2 mitochondrial OS=Mus musculus OX=10090 GN=Mtif2 PE=1 SV=2                 |             |

|         |        |                                                                                                             |             |
|---------|--------|-------------------------------------------------------------------------------------------------------------|-------------|
| Mob3a   | Q8BSU7 | MOB kinase activator 3A OS=Mus musculus OX=10090 GN=Mob3a PE=1 SV=1                                         | 0.843333333 |
| Nek1    | P51954 | Serine/threonine-protein kinase Nek1 OS=Mus musculus OX=10090 GN=Nek1 PE=1 SV=2                             |             |
| Tmem63a | Q91YT8 | CSC1-like protein 1 OS=Mus musculus OX=10090 GN=Tmem63a PE=1 SV=1                                           |             |
| Zc3h8   | Q9JJ48 | Zinc finger CCCH domain-containing protein 8 OS=Mus musculus OX=10090 GN=Zc3h8 PE=1 SV=2                    |             |
| Mrpl51  | Q9CPY1 | 39S ribosomal protein L51 mitochondrial OS=Mus musculus OX=10090 GN=Mrpl51 PE=1 SV=1                        |             |
| Zcchc24 | B2RVL6 | Zinc finger CCHC domain-containing protein 24 OS=Mus musculus OX=10090 GN=Zcchc24 PE=1 SV=0.89              |             |
| Ccdc91  | Q9D8L5 | Coiled-coil domain-containing protein 91 OS=Mus musculus OX=10090 GN=Ccdc91 PE=1 SV=2                       | 0.615       |
| Yaf2    | Q99LW6 | YY1-associated factor 2 OS=Mus musculus OX=10090 GN=Yaf2 PE=1 SV=1                                          | 0.933333333 |
| Dpysl4  | O35098 | Dihydropyrimidinase-related protein 4 OS=Mus musculus OX=10090 GN=Dpysl4 PE=1 SV=1                          |             |
| Lzts2   | Q91YU6 | Leucine zipper putative tumor suppressor 2 OS=Mus musculus OX=10090 GN=Lzts2 PE=1 SV=3                      | 0.84        |
| Ncoa2   | Q61026 | Nuclear receptor coactivator 2 OS=Mus musculus OX=10090 GN=Ncoa2 PE=1 SV=3                                  | 8.395       |
| Pold3   | Q9EQ28 | DNA polymerase delta subunit 3 OS=Mus musculus OX=10090 GN=Pold3 PE=1 SV=2                                  | 0.266666667 |
| Twist2  | Q9D030 | Twist-related protein 2 OS=Mus musculus OX=10090 GN=Twist2 PE=1 SV=1                                        |             |
| Hmgcr   | Q01237 | 3-hydroxy-3-methylglutaryl-coenzyme A reductase OS=Mus musculus OX=10090 GN=Hmgcr PE=1 SV=1                 |             |
| Ift74   | Q8BKE9 | Intraflagellar transport protein 74 homolog OS=Mus musculus OX=10090 GN=Ift74 PE=1 SV=2                     |             |
| Rnf13   | O54965 | E3 ubiquitin-protein ligase RNF13 OS=Mus musculus OX=10090 GN=Rnf13 PE=1 SV=2                               | 0.716666667 |
| Rc3h1   | Q4VGL6 | Roquin-1 OS=Mus musculus OX=10090 GN=Rc3h1 PE=1 SV=1                                                        |             |
| Mvb12a  | Q78HU3 | Multivesicular body subunit 12A OS=Mus musculus OX=10090 GN=Mvb12a PE=1 SV=1                                |             |
| Ormdl3  | Q9CPZ6 | ORM1-like protein 3 OS=Mus musculus OX=10090 GN=Ormdl3 PE=2 SV=1                                            | 0.796666667 |
| Eapp    | Q5BU09 | E2F-associated phosphoprotein OS=Mus musculus OX=10090 GN=Eapp PE=1 SV=2                                    | 1.033333333 |
| Ctdspl2 | Q8BG15 | CTD small phosphatase-like protein 2 OS=Mus musculus OX=10090 GN=Ctdspl2 PE=1 SV=1                          | 2.723333333 |
| Ndufa12 | Q7TMF3 | NADH dehydrogenase [ubiquinone] 1 alpha subcomplex subunit 12 OS=Mus musculus OX=10090 GN=Ndufa12 PE=1 SV=1 | 2.12        |
| Grk5    | Q8VEB1 | G protein-coupled receptor kinase 5 OS=Mus musculus OX=10090 GN=Grk5 PE=1 SV=2                              | 0.665       |
| Tor3a   | Q9ER38 | Torsin-3A OS=Mus musculus OX=10090 GN=Tor3a PE=1 SV=2                                                       | 0.535       |
| Dhx33   | Q80VY9 | ATP-dependent RNA helicase DHX33 OS=Mus musculus OX=10090 GN=Dhx33 PE=1 SV=1                                |             |
| Rabif   | Q91X96 | Guanine nucleotide exchange factor MSS4 OS=Mus musculus OX=10090 GN=Rabif PE=1 SV=1                         | 1.03        |
| Ccny    | Q8BGU5 | Cyclin-Y OS=Mus musculus OX=10090 GN=Ccny PE=1 SV=1                                                         | 0.696666667 |
| Fbxw11  | Q5SRY7 | F-box/WD repeat-containing protein 11 OS=Mus musculus OX=10090 GN=Fbxw11 PE=1 SV=1                          |             |
| Nsun5   | Q8K4F6 | 28S rRNA (cytosine-C(5))-methyltransferase OS=Mus musculus OX=10090 GN=Nsun5 PE=1 SV=2                      |             |
| Optn    | Q8K3K8 | Optineurin OS=Mus musculus OX=10090 GN=Optn PE=1 SV=1                                                       |             |
| Ciao3   | Q7TMW6 | Cytosolic iron-sulfur assembly component 3 OS=Mus musculus OX=10090 GN=Ciao3 PE=1 SV=2                      | 0.825       |
| Saraf   | Q8R3Q0 | Store-operated calcium entry-associated regulatory factor OS=Mus musculus OX=10090 GN=Saraf P               |             |
| Yju2    | Q9D6J3 | Splicing factor YJU2 OS=Mus musculus OX=10090 GN=Yju2 PE=1 SV=1                                             | 0.405       |
| Chkb    | O55229 | Choline/ethanolamine kinase OS=Mus musculus OX=10090 GN=Chkb PE=1 SV=3                                      | 0.935       |



|          |        |                                                                                                            |             |
|----------|--------|------------------------------------------------------------------------------------------------------------|-------------|
| Mzt2     | Q9CQ25 | Mitotic-spindle organizing protein 2 OS=Mus musculus OX=10090 GN=Mzt2 PE=1 SV=1                            | 0.816666667 |
| Fam118a  | Q91YN1 | Protein FAM118A OS=Mus musculus OX=10090 GN=Fam118a PE=1 SV=1                                              |             |
| Cacna1a  | P97445 | Voltage-dependent P/Q-type calcium channel subunit alpha-1A OS=Mus musculus OX=10090 GN=Cacna1a PE=1 SV=1  |             |
| Rnf115   | Q9D0C1 | E3 ubiquitin-protein ligase RNF115 OS=Mus musculus OX=10090 GN=Rnf115 PE=1 SV=1                            | 0.973333333 |
| Isg20l2  | Q3U1G5 | Interferon-stimulated 20 kDa exonuclease-like 2 OS=Mus musculus OX=10090 GN=Isg20l2 PE=1 SV=1              | 0.933333333 |
| Rai1     | Q61818 | Retinoic acid-induced protein 1 OS=Mus musculus OX=10090 GN=Rai1 PE=1 SV=3                                 |             |
| Tcf3     | P15806 | Transcription factor E2-alpha OS=Mus musculus OX=10090 GN=Tcf3 PE=1 SV=2                                   |             |
| Slc39a6  | Q8C145 | Zinc transporter ZIP6 OS=Mus musculus OX=10090 GN=Slc39a6 PE=1 SV=1                                        | 1.203333333 |
| Arl6ip4  | Q9JLM9 | ADP-ribosylation factor-like protein 6-interacting protein 4 OS=Mus musculus OX=10090 GN=Arl6ip4 PE=1 SV=1 | 0.885       |
| Frmd6    | Q8C0V9 | FERM domain-containing protein 6 OS=Mus musculus OX=10090 GN=Frmd6 PE=1 SV=2                               |             |
| Gabpb1   | Q00420 | GA-binding protein subunit beta-1 OS=Mus musculus OX=10090 GN=Gabpb1 PE=1 SV=2                             | 0.63        |
| Mt2      | P02798 | Metallothionein-2 OS=Mus musculus OX=10090 GN=Mt2 PE=1 SV=2                                                | 0.563333333 |
| Zfp202   | Q8CCH7 | Zinc finger protein ZFP202 OS=Mus musculus OX=10090 GN=Zfp202 PE=1 SV=2                                    |             |
| Rcc1l    | Q9CYF5 | RCC1-like G exchanging factor-like protein OS=Mus musculus OX=10090 GN=Rcc1l PE=1 SV=1                     |             |
| Trmu     | Q9DAT5 | Mitochondrial tRNA-specific 2-thiouridylase 1 OS=Mus musculus OX=10090 GN=Trmu PE=1 SV=1                   |             |
| Cr1l     | Q64735 | Complement component receptor 1-like protein OS=Mus musculus OX=10090 GN=Cr1l PE=1 SV=1                    |             |
| Gmeb1    | Q9JL60 | Glucocorticoid modulatory element-binding protein 1 OS=Mus musculus OX=10090 GN=Gmeb1 PE=1 SV=1            | 0.955       |
| Bet1l    | O35153 | BET1-like protein OS=Mus musculus OX=10090 GN=Bet1l PE=3 SV=1                                              | 0.7         |
| Crsl1    | Q80ZM8 | Cardiolipin synthase (CMP-forming) OS=Mus musculus OX=10090 GN=Crsl1 PE=1 SV=1                             |             |
| Loxl1    | P97873 | Lysyl oxidase homolog 1 OS=Mus musculus OX=10090 GN=Loxl1 PE=2 SV=3                                        | 1.996666667 |
| Trappc6b | Q9D289 | Trafficking protein particle complex subunit 6B OS=Mus musculus OX=10090 GN=Trappc6b PE=1 SV=1             | 1.815       |
|          | Q9CRC3 | UPF0235 protein C15orf40 homolog OS=Mus musculus OX=10090 GN=Q9CRC3 PE=1 SV=1                              | 1.193333333 |
| Atp6ap2  | Q9CYN9 | Renin receptor OS=Mus musculus OX=10090 GN=Atp6ap2 PE=1 SV=2                                               | 0.79        |
| Fars2    | Q99M01 | Phenylalanine-tRNA ligase mitochondrial OS=Mus musculus OX=10090 GN=Fars2 PE=1 SV=1                        |             |
| Exd2     | Q8VEG4 | Exonuclease 3'-5' domain-containing protein 2 OS=Mus musculus OX=10090 GN=Exd2 PE=1 SV=2                   | 0.965       |
| Hsd17b8  | P50171 | Estradiol 17-beta-dehydrogenase 8 OS=Mus musculus OX=10090 GN=Hsd17b8 PE=1 SV=2                            | 1.345       |
| Strada   | Q3UUJ4 | STE20-related kinase adapter protein alpha OS=Mus musculus OX=10090 GN=Strada PE=1 SV=1                    |             |
| Myo19    | Q5SV80 | Unconventional myosin-XIX OS=Mus musculus OX=10090 GN=Myo19 PE=1 SV=1                                      |             |
| mt-Co3   | P00416 | Cytochrome c oxidase subunit 3 OS=Mus musculus OX=10090 GN=mt-Co3 PE=1 SV=2                                | 0.993333333 |
| Cd99l2   | Q8BIF0 | CD99 antigen-like protein 2 OS=Mus musculus OX=10090 GN=Cd99l2 PE=1 SV=1                                   | 1.826666667 |
| Cln8     | Q9QUK3 | Protein CLN8 OS=Mus musculus OX=10090 GN=Cln8 PE=1 SV=1                                                    | 0.75        |
| Vti1a    | O89116 | Vesicle transport through interaction with t-SNAREs homolog 1A OS=Mus musculus OX=10090 GN=Vti1a PE=1 SV=1 | 1.12        |
| Aktip    | Q64362 | AKT-interacting protein OS=Mus musculus OX=10090 GN=Aktip PE=1 SV=1                                        | 0.32        |
| Tbc1d12  | Q6A039 | TBC1 domain family member 12 OS=Mus musculus OX=10090 GN=Tbc1d12 PE=1 SV=2                                 | 0.905       |

|          |        |                                                                                                                  |             |
|----------|--------|------------------------------------------------------------------------------------------------------------------|-------------|
| Scoc     | Q78YZ6 | Short coiled-coil protein OS=Mus musculus OX=10090 GN=Scoc PE=1 SV=1                                             | 1.333333333 |
| Paip2    | Q9D6V8 | Polyadenylate-binding protein-interacting protein 2 OS=Mus musculus OX=10090 GN=Paip2 PE=1 SV=1                  | 0.843333333 |
| Txndc15  | Q6P6J9 | Thioredoxin domain-containing protein 15 OS=Mus musculus OX=10090 GN=Txndc15 PE=1 SV=1                           | 1.01        |
| Mtres1   | Q9CQF4 | Mitochondrial transcription rescue factor 1 OS=Mus musculus OX=10090 GN=Mtres1 PE=1 SV=1                         | 0.89        |
| Trappc2  | Q9CQP2 | Trafficking protein particle complex subunit 2 OS=Mus musculus OX=10090 GN=Trappc2 PE=1 SV=1                     | 0.83        |
| Ndufb7   | Q9CR61 | NADH dehydrogenase [ubiquinone] 1 beta subcomplex subunit 7 OS=Mus musculus OX=10090 GN=Ndufb7 PE=1 SV=1         | 0.685       |
| Rhod     | P97348 | Rho-related GTP-binding protein RhoD OS=Mus musculus OX=10090 GN=Rhod PE=1 SV=1                                  | 0.783333333 |
| Cox7a2l  | Q61387 | Cytochrome c oxidase subunit 7A-related protein mitochondrial OS=Mus musculus OX=10090 GN=Cox7a2l PE=1 SV=1      | 1.203333333 |
| Socs6    | Q9JLY0 | Suppressor of cytokine signaling 6 OS=Mus musculus OX=10090 GN=Socs6 PE=1 SV=2                                   | 0.906666667 |
| Ankrd39  | Q9D2X0 | Ankyrin repeat domain-containing protein 39 OS=Mus musculus OX=10090 GN=Ankrd39 PE=1 SV=1                        | 1.555       |
| St5      | Q924W7 | DENN domain-containing protein 2B OS=Mus musculus OX=10090 GN=Dennd2b PE=1 SV=1                                  | 0.65        |
| Surf1    | P09925 | Surfeit locus protein 1 OS=Mus musculus OX=10090 GN=Surf1 PE=1 SV=3                                              | 1.186666667 |
| Ostc     | Q78XF5 | Oligosaccharyltransferase complex subunit OSTC OS=Mus musculus OX=10090 GN=Ostc PE=1 SV=1                        | 0.8         |
| Slc66a3  | Q8C6U2 | Solute carrier family 66 member 3 OS=Mus musculus OX=10090 GN=Slc66a3 PE=1 SV=1                                  | 0.746666667 |
| Cars2    | Q8BYM8 | Probable cysteine--tRNA ligase mitochondrial OS=Mus musculus OX=10090 GN=Cars2 PE=1 SV=2                         | 0.9         |
| Yipf4    | Q8C407 | Protein YIPF4 OS=Mus musculus OX=10090 GN=Yipf4 PE=1 SV=1                                                        | 0.89        |
| Gypc     | Q78HU7 | Glycophorin-C OS=Mus musculus OX=10090 GN=Gypc PE=1 SV=2                                                         | 0.68        |
| Bloc1s5  | Q8R015 | Biogenesis of lysosome-related organelles complex 1 subunit 5 OS=Mus musculus OX=10090 GN=Bloc1s5 PE=1 SV=1      | 0.685       |
| Rarg     | P18911 | Retinoic acid receptor gamma OS=Mus musculus OX=10090 GN=Rarg PE=1 SV=3                                          | 0.815       |
| Tbc1d22a | Q8R5A6 | TBC1 domain family member 22A OS=Mus musculus OX=10090 GN=Tbc1d22a PE=1 SV=3                                     | 1.15        |
| Elof1    | P60003 | Transcription elongation factor 1 homolog OS=Mus musculus OX=10090 GN=Elof1 PE=1 SV=1                            | 0.85        |
| Zcchc9   | Q8R1J3 | Zinc finger CCHC domain-containing protein 9 OS=Mus musculus OX=10090 GN=Zcchc9 PE=2 SV=2                        | 0.85        |
| Polr3k   | Q9CQZ7 | DNA-directed RNA polymerase III subunit RPC10 OS=Mus musculus OX=10090 GN=Polr3k PE=3 SV=1                       | 0.85        |
| Ndufs4   | Q9CXZ1 | NADH dehydrogenase [ubiquinone] iron-sulfur protein 4 mitochondrial OS=Mus musculus OX=10090 GN=Ndufs4 PE=1 SV=1 | 0.85        |
| C2cd5    | Q7TPS5 | C2 domain-containing protein 5 OS=Mus musculus OX=10090 GN=C2cd5 PE=1 SV=2                                       | 0.345       |
| Senp1    | P59110 | Sentrin-specific protease 1 OS=Mus musculus OX=10090 GN=Senp1 PE=1 SV=1                                          | 2.206666667 |
| Abhd10   | Q6PE15 | Mycophenolic acid acyl-glucuronide esterase mitochondrial OS=Mus musculus OX=10090 GN=Abhd10 PE=1 SV=1           | 0.023333333 |
| Serpinf2 | Q61247 | Alpha-2-antiplasmin OS=Mus musculus OX=10090 GN=Serpinf2 PE=1 SV=1                                               | 0.92        |
| Tmem237  | Q3V0J1 | Transmembrane protein 237 OS=Mus musculus OX=10090 GN=Tmem237 PE=1 SV=1                                          | 0.92        |
| Peg3     | Q3URU2 | Paternally-expressed gene 3 protein OS=Mus musculus OX=10090 GN=Peg3 PE=1 SV=1                                   | 0.96        |
| Pik3r2   | O08908 | Phosphatidylinositol 3-kinase regulatory subunit beta OS=Mus musculus OX=10090 GN=Pik3r2 PE=1 SV=1               | 1.49        |
| Orc2     | Q60862 | Origin recognition complex subunit 2 OS=Mus musculus OX=10090 GN=Orc2 PE=1 SV=1                                  | 0.9         |
| Sepsecs  | Q6P6M7 | O-phosphoserine--tRNA(Sec) selenium transferase OS=Mus musculus OX=10090 GN=Sepsecs PE=1 SV=1                    | 0.9         |
| Ggnbp2   | Q5SV77 | Gametogenetin-binding protein 2 OS=Mus musculus OX=10090 GN=Ggnbp2 PE=1 SV=1                                     | 0.9         |

|           |        |                                                                                                  |             |
|-----------|--------|--------------------------------------------------------------------------------------------------|-------------|
| Magi3     | Q9EQJ9 | Membrane-associated guanylate kinase WW and PDZ domain-containing protein 3 OS=Mus muscul        |             |
| Man1b1    | A2AJ15 | Endoplasmic reticulum mannosyl-oligosaccharide 1 2-alpha-mannosidase OS=Mus musculus OX=10       |             |
| Sirt5     | Q8K2C6 | NAD-dependent protein deacylase sirtuin-5 mitochondrial OS=Mus musculus OX=10090 GN=Sirt5 I      | 0.883333333 |
| Rab12     | E9Q9D5 | Rab-like protein 2A OS=Mus musculus OX=10090 GN=Rab12 PE=1 SV=1                                  | 2.32        |
| Dhrs13    | Q5SS80 | Dehydrogenase/reductase SDR family member 13 OS=Mus musculus OX=10090 GN=Dhrs13 PE=1 SV          |             |
| Slc29a3   | Q99P65 | Equilibrative nucleoside transporter 3 OS=Mus musculus OX=10090 GN=Slc29a3 PE=1 SV=1             | 0.463333333 |
| Gtf2a1    | Q99PM3 | Transcription initiation factor IIA subunit 1 OS=Mus musculus OX=10090 GN=Gtf2a1 PE=1 SV=2       |             |
| Cpeb4     | Q7TN98 | Cytoplasmic polyadenylation element-binding protein 4 OS=Mus musculus OX=10090 GN=Cpeb4 P        |             |
| Pold4     | Q9CWP8 | DNA polymerase delta subunit 4 OS=Mus musculus OX=10090 GN=Pold4 PE=1 SV=1                       |             |
| Nfatc4    | Q8K120 | Nuclear factor of activated T-cells cytoplasmic 4 OS=Mus musculus OX=10090 GN=Nfatc4 PE=1 SV=1   | 1.85        |
| Tssc4     | Q9JHE7 | Protein TSSC4 OS=Mus musculus OX=10090 GN=Tssc4 PE=1 SV=1                                        |             |
| Wars2     | Q9CYK1 | Tryptophan--tRNA ligase mitochondrial OS=Mus musculus OX=10090 GN=Wars2 PE=1 SV=2                |             |
|           | Q8R3Y5 | Uncharacterized protein C19orf47 homolog OS=Mus musculus OX=10090 PE=1 SV=2                      | 0.94        |
| Actr6     | Q9D864 | Actin-related protein 6 OS=Mus musculus OX=10090 GN=Actr6 PE=1 SV=2                              | 0.45        |
| Mex3c     | Q05A36 | RNA-binding E3 ubiquitin-protein ligase MEX3C OS=Mus musculus OX=10090 GN=Mex3c PE=2 SV=2        | 0.585       |
| Gtf2h1    | Q9DBA9 | General transcription factor IIH subunit 1 OS=Mus musculus OX=10090 GN=Gtf2h1 PE=1 SV=2          |             |
| Scamp4    | Q9JKV5 | Secretory carrier-associated membrane protein 4 OS=Mus musculus OX=10090 GN=Scamp4 PE=1 SV       | 0.44        |
| Tomm20    | Q9DCC8 | Mitochondrial import receptor subunit TOM20 homolog OS=Mus musculus OX=10090 GN=Tomm2            | 0.75        |
| Pole4     | Q9CQ36 | DNA polymerase epsilon subunit 4 OS=Mus musculus OX=10090 GN=Pole4 PE=1 SV=1                     | 0.583333333 |
| Synpo     | Q8CC35 | Synaptopodin OS=Mus musculus OX=10090 GN=Synpo PE=1 SV=2                                         |             |
| Eef1akmt2 | Q9D853 | EEF1A lysine methyltransferase 2 OS=Mus musculus OX=10090 GN=Eef1akmt2 PE=1 SV=1                 | 2.513333333 |
| Thnsl2    | Q80W22 | Threonine synthase-like 2 OS=Mus musculus OX=10090 GN=Thnsl2 PE=1 SV=1                           | 0.725       |
| Krtcap2   | Q5RL79 | Keratinocyte-associated protein 2 OS=Mus musculus OX=10090 GN=Krtcap2 PE=1 SV=2                  | 0.77        |
| Ces2c     | Q91WG0 | Acylcarnitine hydrolase OS=Mus musculus OX=10090 GN=Ces2c PE=1 SV=1                              |             |
| Akap8l    | Q9R0L7 | A-kinase anchor protein 8-like OS=Mus musculus OX=10090 GN=Akap8l PE=1 SV=1                      |             |
| Ptdss1    | Q99LH2 | Phosphatidylserine synthase 1 OS=Mus musculus OX=10090 GN=Ptdss1 PE=1 SV=1                       | 1.01        |
| Wdtdc1    | Q80ZK9 | WD and tetratricopeptide repeats protein 1 OS=Mus musculus OX=10090 GN=Wdtdc1 PE=1 SV=1          | 1.115       |
| Stat2     | Q9WVL2 | Signal transducer and activator of transcription 2 OS=Mus musculus OX=10090 GN=Stat2 PE=1 SV=1   |             |
| Mtmt12    | Q80TA6 | Myotubularin-related protein 12 OS=Mus musculus OX=10090 GN=Mtmt12 PE=1 SV=2                     |             |
| Golga7    | Q91W53 | Golgin subfamily A member 7 OS=Mus musculus OX=10090 GN=Golga7 PE=1 SV=1                         | 1.286666667 |
| Erc2      | O08811 | General transcription and DNA repair factor IIH helicase subunit XPD OS=Mus musculus OX=10090 GN | 0.813333333 |
| Retreg3   | Q9CQV4 | Reticulophagy regulator 3 OS=Mus musculus OX=10090 GN=Retreg3 PE=1 SV=1                          | 0.975       |
| Coq4      | Q8BGB8 | Ubiquinone biosynthesis protein COQ4 homolog mitochondrial OS=Mus musculus OX=10090 GN=          | 1.115       |
| Erg28     | Q9ERY9 | Ergosterol biosynthetic protein 28 homolog OS=Mus musculus OX=10090 GN=Erg28 PE=2 SV=1           | 0.415       |



|        |        |                                                                                                            |             |
|--------|--------|------------------------------------------------------------------------------------------------------------|-------------|
| Chac2  | Q9CQG1 | Putative glutathione-specific gamma-glutamylcyclotransferase 2 OS=Mus musculus OX=10090 GN=Chac2 PE=1 SV=1 | 0.803333333 |
| Usp28  | Q5I043 | Ubiquitin carboxyl-terminal hydrolase 28 OS=Mus musculus OX=10090 GN=Usp28 PE=1 SV=1                       | 1.4         |
| Tipin  | Q91WA1 | TIMELESS-interacting protein OS=Mus musculus OX=10090 GN=Tipin PE=1 SV=2                                   | 0.746666667 |
| Polrmt | Q8BKF1 | DNA-directed RNA polymerase mitochondrial OS=Mus musculus OX=10090 GN=Polrmt PE=1 SV=1                     |             |
| Synj1  | Q8CHC4 | Synaptojanin-1 OS=Mus musculus OX=10090 GN=Synj1 PE=1 SV=3                                                 |             |
| Vkorc1 | Q9CRC0 | Vitamin K epoxide reductase complex subunit 1 OS=Mus musculus OX=10090 GN=Vkorc1 PE=1 SV=1                 | 1.243333333 |
| Mpv17  | P19258 | Protein Mpv17 OS=Mus musculus OX=10090 GN=Mpv17 PE=1 SV=1                                                  |             |
| Rnf170 | Q8CBG9 | E3 ubiquitin-protein ligase RNF170 OS=Mus musculus OX=10090 GN=Rnf170 PE=1 SV=1                            |             |
| Spag5  | Q7TME2 | Sperm-associated antigen 5 OS=Mus musculus OX=10090 GN=Spag5 PE=1 SV=1                                     | 1.025       |
| Apba3  | O88888 | Amyloid-beta A4 precursor protein-binding family A member 3 OS=Mus musculus OX=10090 GN=Apba3 PE=1 SV=1    |             |
| Gabpb2 | P81069 | GA-binding protein subunit beta-2 OS=Mus musculus OX=10090 GN=Gabpb2 PE=1 SV=2                             | 0.92        |
| Alg9   | Q8VDI9 | Alpha-1 2-mannosyltransferase ALG9 OS=Mus musculus OX=10090 GN=Alg9 PE=2 SV=1                              |             |
|        | Q9CWU4 | UPF0690 protein C1orf52 homolog OS=Mus musculus OX=10090 PE=1 SV=1                                         | 1.45        |
| Plgrkt | Q9D3P8 | Plasminogen receptor (KT) OS=Mus musculus OX=10090 GN=Plgrkt PE=1 SV=1                                     | 1.353333333 |
| Pdcl   | Q9DBX2 | Phosducin-like protein OS=Mus musculus OX=10090 GN=Pdcl PE=1 SV=1                                          | 0.53        |
| Lmbrd1 | Q8K0B2 | Lysosomal cobalamin transport escort protein LMBD1 OS=Mus musculus OX=10090 GN=Lmbrd1 PE=1 SV=1            | 0.866666667 |
| Sesn2  | P58043 | Sestrin-2 OS=Mus musculus OX=10090 GN=Sesn2 PE=1 SV=1                                                      |             |
| Sesn3  | Q9CYP7 | Sestrin-3 OS=Mus musculus OX=10090 GN=Sesn3 PE=1 SV=1                                                      |             |
| Bend3  | Q6PAL0 | BEN domain-containing protein 3 OS=Mus musculus OX=10090 GN=Bend3 PE=1 SV=1                                |             |
| Pomp   | Q9CQT5 | Proteasome maturation protein OS=Mus musculus OX=10090 GN=Pomp PE=1 SV=1                                   | 1.093333333 |
| Tmsb10 | Q6ZWY8 | Thymosin beta-10 OS=Mus musculus OX=10090 GN=Tmsb10 PE=1 SV=3                                              | 0.613333333 |
| Cyhr1  | Q9QXA1 | Cysteine and histidine-rich protein 1 OS=Mus musculus OX=10090 GN=Cyhr1 PE=1 SV=1                          | 0.77        |
| Rgl3   | Q3UYI5 | Ral guanine nucleotide dissociation stimulator-like 3 OS=Mus musculus OX=10090 GN=Rgl3 PE=1 SV=1           |             |
| Pex7   | P97865 | Peroxisomal targeting signal 2 receptor OS=Mus musculus OX=10090 GN=Pex7 PE=1 SV=1                         | 1.99        |
| Mtnd3  | P03899 | NADH-ubiquinone oxidoreductase chain 3 OS=Mus musculus OX=10090 GN=Mtnd3 PE=1 SV=3                         | 0.69        |
| Sppl2a | Q9JJF9 | Signal peptide peptidase-like 2A OS=Mus musculus OX=10090 GN=Sppl2a PE=1 SV=2                              | 0.83        |
| Znhit2 | Q9QY66 | Zinc finger HIT domain-containing protein 2 OS=Mus musculus OX=10090 GN=Znhit2 PE=2 SV=2                   |             |
| Znf787 | Q8BIF9 | Zinc finger protein 787 OS=Mus musculus OX=10090 GN=Znf787 PE=2 SV=3                                       |             |
| Mmaa   | Q8C7H1 | Methylmalonic aciduria type A homolog mitochondrial OS=Mus musculus OX=10090 GN=Mmaa PE=1 SV=1             |             |
| Smg5   | Q6ZPY2 | Protein SMG5 OS=Mus musculus OX=10090 GN=Smg5 PE=1 SV=2                                                    | 1.54        |
| Inpp5f | Q8CDA1 | Phosphatidylinositol phosphatase SAC2 OS=Mus musculus OX=10090 GN=Inpp5f PE=1 SV=1                         |             |
| Gdpd1  | Q9CRY7 | Lysophospholipase D GDPD1 OS=Mus musculus OX=10090 GN=Gdpd1 PE=1 SV=1                                      | 1.57        |
| Bcl2   | P10417 | Apoptosis regulator Bcl-2 OS=Mus musculus OX=10090 GN=Bcl2 PE=1 SV=3                                       | 0.986666667 |
| Znrf2  | Q71FD5 | E3 ubiquitin-protein ligase ZNRF2 OS=Mus musculus OX=10090 GN=Znrf2 PE=1 SV=1                              |             |

|           |        |                                                                                              |             |
|-----------|--------|----------------------------------------------------------------------------------------------|-------------|
| Cmtm7     | Q9ESD6 | CKLF-like MARVEL transmembrane domain-containing protein 7 OS=Mus musculus OX=10090 GN=C     | 0.68        |
| Ddx58     | Q6Q899 | Antiviral innate immune response receptor RIG-I OS=Mus musculus OX=10090 GN=Ddx58 PE=1 SV=   | 0.99        |
| Hus1      | Q8BQY8 | Checkpoint protein HUS1 OS=Mus musculus OX=10090 GN=Hus1 PE=2 SV=1                           |             |
| Dpm3      | Q9D1Q4 | Dolichol-phosphate mannosyltransferase subunit 3 OS=Mus musculus OX=10090 GN=Dpm3 PE=1 S'    | 1.113333333 |
| Gan       | Q8CA72 | Gigaxonin OS=Mus musculus OX=10090 GN=Gan PE=1 SV=2                                          | 1.22        |
|           | Q5XFZ0 | UPF0711 protein C18orf21 homolog OS=Mus musculus OX=10090 PE=2 SV=2                          | 1.08        |
| Plac8     | Q9JI48 | Placenta-specific gene 8 protein OS=Mus musculus OX=10090 GN=Plac8 PE=1 SV=1                 | 1.356666667 |
| Slc11a2   | P49282 | Natural resistance-associated macrophage protein 2 OS=Mus musculus OX=10090 GN=Slc11a2 PE=1  |             |
| Ankib1    | Q6ZPS6 | Ankyrin repeat and IBR domain-containing protein 1 OS=Mus musculus OX=10090 GN=Ankib1 PE=1   |             |
| Mid1      | O70583 | E3 ubiquitin-protein ligase Midline-1 OS=Mus musculus OX=10090 GN=Mid1 PE=1 SV=2             | 0.815       |
| Btg1      | P62325 | Protein BTG1 OS=Mus musculus OX=10090 GN=Btg1 PE=1 SV=1                                      | 1.385       |
| Acp2      | P24638 | Lysosomal acid phosphatase OS=Mus musculus OX=10090 GN=Acp2 PE=1 SV=2                        | 0.906666667 |
| Calhm2    | Q8VEC4 | Calcium homeostasis modulator protein 2 OS=Mus musculus OX=10090 GN=Calhm2 PE=2 SV=1         | 0.85        |
| Yeats2    | Q3TUF7 | YEATS domain-containing protein 2 OS=Mus musculus OX=10090 GN=Yeats2 PE=1 SV=2               |             |
| Slc25a51  | Q5HZI9 | Solute carrier family 25 member 51 OS=Mus musculus OX=10090 GN=Slc25a51 PE=1 SV=1            | 0.853333333 |
| Tsc2      | Q61037 | Tuberin OS=Mus musculus OX=10090 GN=Tsc2 PE=1 SV=1                                           |             |
| Pimreg    | Q8BFY7 | Protein PIMREG OS=Mus musculus OX=10090 GN=Pimreg PE=1 SV=1                                  | 0.495       |
| Gtf2h3    | Q8VD76 | General transcription factor IIH subunit 3 OS=Mus musculus OX=10090 GN=Gtf2h3 PE=1 SV=1      |             |
| Chka      | O54804 | Choline kinase alpha OS=Mus musculus OX=10090 GN=Chka PE=1 SV=3                              |             |
| Leprot    | O89013 | Leptin receptor gene-related protein OS=Mus musculus OX=10090 GN=Leprot PE=1 SV=1            |             |
| Secisbp2l | Q6A098 | Selenocysteine insertion sequence-binding protein 2-like OS=Mus musculus OX=10090 GN=Secisbp | 1.635       |
| Ccdc137   | Q8R0K4 | Coiled-coil domain-containing protein 137 OS=Mus musculus OX=10090 GN=Ccdc137 PE=2 SV=1      |             |
| Mcee      | Q9D1I5 | Methylmalonyl-CoA epimerase mitochondrial OS=Mus musculus OX=10090 GN=Mcee PE=1 SV=1         | 0.75        |
| Serpina3f | Q80X76 | Serine protease inhibitor A3F OS=Mus musculus OX=10090 GN=Serpina3f PE=1 SV=3                | 0.53        |
| Bin3      | Q9JI08 | Bridging integrator 3 OS=Mus musculus OX=10090 GN=Bin3 PE=1 SV=1                             |             |
| Rgn       | Q64374 | Regucalcin OS=Mus musculus OX=10090 GN=Rgn PE=1 SV=1                                         | 0.856666667 |
| Fkbp14    | P59024 | Peptidyl-prolyl cis-trans isomerase FKBP14 OS=Mus musculus OX=10090 GN=Fkbp14 PE=1 SV=1      | 1.275       |
| Fyttd1    | Q91Z49 | UAP56-interacting factor OS=Mus musculus OX=10090 GN=Fyttd1 PE=1 SV=1                        | 1.156666667 |
| Slc33a1   | Q99J27 | Acetyl-coenzyme A transporter 1 OS=Mus musculus OX=10090 GN=Slc33a1 PE=1 SV=1                | 1.086666667 |
| Tor2a     | P0C7W3 | Prosalusin OS=Mus musculus OX=10090 GN=Tor2a PE=3 SV=1                                       |             |
| Tor2a     | Q8R1J9 | Torsin-2A OS=Mus musculus OX=10090 GN=Tor2a PE=1 SV=1                                        |             |
| Fgfr1op2  | Q9CRA9 | FGFR1 oncogene partner 2 homolog OS=Mus musculus OX=10090 GN=Fgfr1op2 PE=1 SV=1              |             |
| Chmp1a    | Q921W0 | Charged multivesicular body protein 1a OS=Mus musculus OX=10090 GN=Chmp1a PE=1 SV=1          | 0.7         |
| Pja1      | O55176 | E3 ubiquitin-protein ligase Praja-1 OS=Mus musculus OX=10090 GN=Pja1 PE=1 SV=3               |             |

|           |        |                                                                                              |             |
|-----------|--------|----------------------------------------------------------------------------------------------|-------------|
| Arrb1     | Q8BWG8 | Beta-arrestin-1 OS=Mus musculus OX=10090 GN=Arrb1 PE=1 SV=1                                  | 2.515       |
| Slc30a5   | Q8R4H9 | Zinc transporter 5 OS=Mus musculus OX=10090 GN=Slc30a5 PE=1 SV=1                             |             |
| Fbxo5     | Q7TSG3 | F-box only protein 5 OS=Mus musculus OX=10090 GN=Fbxo5 PE=1 SV=1                             | 0.993333333 |
| Tm4sf1    | Q64302 | Transmembrane 4 L6 family member 1 OS=Mus musculus OX=10090 GN=Tm4sf1 PE=1 SV=1              | 0.926666667 |
| Crcp      | O35427 | DNA-directed RNA polymerase III subunit RPC9 OS=Mus musculus OX=10090 GN=Crcp PE=2 SV=1      | 0.823333333 |
| Znf346    | Q9R0B7 | Zinc finger protein 346 OS=Mus musculus OX=10090 GN=Znf346 PE=1 SV=1                         | 0.9         |
| Vps39     | Q8R5L3 | Vam6/Vps39-like protein OS=Mus musculus OX=10090 GN=Vps39 PE=1 SV=1                          | 1.27        |
| Elf2      | Q9JHC9 | ETS-related transcription factor Elf-2 OS=Mus musculus OX=10090 GN=Elf2 PE=1 SV=1            |             |
| Ssna1     | Q9JJ94 | Sjoegren syndrome nuclear autoantigen 1 homolog OS=Mus musculus OX=10090 GN=Ssna1 PE=1 SV=1  | 1.003333333 |
| Mfsd5     | Q921Y4 | Molybdate-anion transporter OS=Mus musculus OX=10090 GN=Mfsd5 PE=2 SV=1                      | 0.425       |
| Klf4      | Q60793 | Krueppel-like factor 4 OS=Mus musculus OX=10090 GN=Klf4 PE=1 SV=3                            | 0.735       |
| Khdc4     | Q3TCX3 | KH homology domain-containing protein 4 OS=Mus musculus OX=10090 GN=Khdc4 PE=1 SV=1          |             |
| Tbp       | P29037 | TATA-box-binding protein OS=Mus musculus OX=10090 GN=Tbp PE=1 SV=1                           | 0.5         |
| Fbxl8     | Q8CIG9 | F-box/LRR-repeat protein 8 OS=Mus musculus OX=10090 GN=Fbxl8 PE=1 SV=1                       | 0.99        |
| Cmtr2     | Q8BWQ4 | Cap-specific mRNA (nucleoside-2'-O-)-methyltransferase 2 OS=Mus musculus OX=10090 GN=Cmtr2   |             |
| Epb41i5   | Q8BGS1 | Band 4.1-like protein 5 OS=Mus musculus OX=10090 GN=Epb41i5 PE=1 SV=1                        |             |
| Ccdc90b   | Q8C3X2 | Coiled-coil domain-containing protein 90B mitochondrial OS=Mus musculus OX=10090 GN=Ccdc90b  | 0.86        |
| Crtc1     | Q68ED7 | CREB-regulated transcription coactivator 1 OS=Mus musculus OX=10090 GN=Crtc1 PE=1 SV=1       | 0.766666667 |
| Kmt2a     | P55200 | Histone-lysine N-methyltransferase 2A OS=Mus musculus OX=10090 GN=Kmt2a PE=1 SV=3            |             |
| Hscb      | Q8K3A0 | Iron-sulfur cluster co-chaperone protein HscB OS=Mus musculus OX=10090 GN=Hscb PE=1 SV=2     |             |
| Mtbp      | Q8BJS8 | Mdm2-binding protein OS=Mus musculus OX=10090 GN=Mtbp PE=1 SV=1                              |             |
| Sap130    | Q8BIH0 | Histone deacetylase complex subunit SAP130 OS=Mus musculus OX=10090 GN=Sap130 PE=1 SV=2      | 3.49        |
| Sox9      | Q04887 | Transcription factor SOX-9 OS=Mus musculus OX=10090 GN=Sox9 PE=1 SV=2                        |             |
| Ip6k1     | Q6PD10 | Inositol hexakisphosphate kinase 1 OS=Mus musculus OX=10090 GN=Ip6k1 PE=2 SV=1               |             |
| Ankrd54   | Q91WK7 | Ankyrin repeat domain-containing protein 54 OS=Mus musculus OX=10090 GN=Ankrd54 PE=1 SV=1    | 0.666666667 |
| Gale      | Q8R059 | UDP-glucose 4-epimerase OS=Mus musculus OX=10090 GN=Gale PE=1 SV=1                           | 0.965       |
| Atad5     | Q4QY64 | ATPase family AAA domain-containing protein 5 OS=Mus musculus OX=10090 GN=Atad5 PE=1 SV=1    | 1.125       |
| Rnf123    | Q5XPI3 | E3 ubiquitin-protein ligase RNF123 OS=Mus musculus OX=10090 GN=Rnf123 PE=1 SV=1              | 0.005       |
| Osr1      | Q9WVG7 | Protein odd-skipped-related 1 OS=Mus musculus OX=10090 GN=Osr1 PE=1 SV=1                     | 0.875       |
| Mvb12b    | Q6KAU4 | Multivesicular body subunit 12B OS=Mus musculus OX=10090 GN=Mvb12b PE=1 SV=2                 | 1.56        |
| Arhgap11a | Q80Y19 | Rho GTPase-activating protein 11A OS=Mus musculus OX=10090 GN=Arhgap11a PE=1 SV=2            | 1.08        |
| Pex16     | Q91XC9 | Peroxisomal membrane protein PEX16 OS=Mus musculus OX=10090 GN=Pex16 PE=1 SV=2               |             |
| Tgoln1    | Q62313 | Trans-Golgi network integral membrane protein 1 OS=Mus musculus OX=10090 GN=Tgoln1 PE=1 SV=1 |             |
| Tgoln2    | Q62314 | Trans-Golgi network integral membrane protein 2 OS=Mus musculus OX=10090 GN=Tgoln2 PE=1 SV=1 |             |

|          |        |                                                                                                     |             |
|----------|--------|-----------------------------------------------------------------------------------------------------|-------------|
| Fez2     | Q6TYB5 | Fasciculation and elongation protein zeta-2 OS=Mus musculus OX=10090 GN=Fez2 PE=2 SV=1              | 0.976666667 |
| Synj2bp  | Q9D6K5 | Synaptojanin-2-binding protein OS=Mus musculus OX=10090 GN=Synj2bp PE=1 SV=1                        | 1.626666667 |
| Cldnd1   | Q9CQX5 | Claudin domain-containing protein 1 OS=Mus musculus OX=10090 GN=Cldnd1 PE=1 SV=1                    | 0.946666667 |
| Serpind1 | P49182 | Heparin cofactor 2 OS=Mus musculus OX=10090 GN=Serpind1 PE=1 SV=1                                   | 0.076666667 |
| Atp7a    | Q64430 | Copper-transporting ATPase 1 OS=Mus musculus OX=10090 GN=Atp7a PE=1 SV=3                            |             |
| Npc1     | O35604 | NPC intracellular cholesterol transporter 1 OS=Mus musculus OX=10090 GN=Npc1 PE=1 SV=2              | 1.743333333 |
| Klf13    | Q9JJZ6 | Krueppel-like factor 13 OS=Mus musculus OX=10090 GN=Klf13 PE=1 SV=2                                 | 0.695       |
| Atp6v1f  | Q9D1K2 | V-type proton ATPase subunit F OS=Mus musculus OX=10090 GN=Atp6v1f PE=1 SV=2                        | 1.416666667 |
| Zcchc10  | Q9CX48 | Zinc finger CCHC domain-containing protein 10 OS=Mus musculus OX=10090 GN=Zcchc10 PE=2 SV=          | 0.91        |
| Nrm      | Q8VC65 | Nurim OS=Mus musculus OX=10090 GN=Nrm PE=1 SV=1                                                     | 1.283333333 |
| Ccnc     | Q62447 | Cyclin-C OS=Mus musculus OX=10090 GN=Ccnc PE=2 SV=4                                                 |             |
| Fam168a  | Q8BGZ2 | Protein FAM168A OS=Mus musculus OX=10090 GN=Fam168a PE=1 SV=1                                       |             |
| Gse1     | Q3U3C9 | Genetic suppressor element 1 OS=Mus musculus OX=10090 GN=Gse1 PE=1 SV=2                             |             |
| Fau      | P62862 | 40S ribosomal protein S30 OS=Mus musculus OX=10090 GN=Fau PE=1 SV=1                                 | 1.243333333 |
| Dnaaf2   | Q8BPI1 | Protein kintoun OS=Mus musculus OX=10090 GN=Dnaaf2 PE=1 SV=2                                        |             |
| Dap      | Q91XC8 | Death-associated protein 1 OS=Mus musculus OX=10090 GN=Dap PE=1 SV=3                                | 0.506666667 |
| Acad11   | Q80XL6 | Acyl-CoA dehydrogenase family member 11 OS=Mus musculus OX=10090 GN=Acad11 PE=1 SV=2                |             |
| Bbx      | Q8VBW5 | HMG box transcription factor BBX OS=Mus musculus OX=10090 GN=Bbx PE=1 SV=2                          |             |
| Pttg1ip  | Q8R143 | Pituitary tumor-transforming gene 1 protein-interacting protein OS=Mus musculus OX=10090 GN=Pttg1ip | 0.866666667 |
| Atpaf1   | Q81110 | ATP synthase mitochondrial F1 complex assembly factor 1 OS=Mus musculus OX=10090 GN=Atpaf1          | 1.18        |
| Eva1b    | Q8K2Y3 | Protein eva-1 homolog B OS=Mus musculus OX=10090 GN=Eva1b PE=1 SV=1                                 | 0.285       |
| Alkbh8   | Q80Y20 | Alkylated DNA repair protein alkB homolog 8 OS=Mus musculus OX=10090 GN=Alkbh8 PE=1 SV=1            | 0.345       |
| Mif4gd   | Q3UBZ5 | MIF4G domain-containing protein OS=Mus musculus OX=10090 GN=Mif4gd PE=1 SV=1                        |             |
| Fam89b   | Q9QUI1 | Leucine repeat adapter protein 25 OS=Mus musculus OX=10090 GN=Fam89b PE=1 SV=1                      |             |
| Psmb8    | P28063 | Proteasome subunit beta type-8 OS=Mus musculus OX=10090 GN=Psmb8 PE=1 SV=2                          |             |
| Ubac2    | Q8R1K1 | Ubiquitin-associated domain-containing protein 2 OS=Mus musculus OX=10090 GN=Ubac2 PE=1 SV=         |             |
|          | Q922R1 | UPF0183 protein C16orf70 homolog OS=Mus musculus OX=10090 GN=                                       |             |
| Slc25a20 | Q9Z2Z6 | Mitochondrial carnitine/acylcarnitine carrier protein OS=Mus musculus OX=10090 GN=Slc25a20 P        | 0.91        |
| Ttpal    | Q9D3D0 | Alpha-tocopherol transfer protein-like OS=Mus musculus OX=10090 GN=Ttpal PE=1 SV=3                  |             |
| Zfyve21  | Q8VCM3 | Zinc finger FYVE domain-containing protein 21 OS=Mus musculus OX=10090 GN=Zfyve21 PE=1 SV=2         |             |
| Mcur1    | Q9CXD6 | Mitochondrial calcium uniporter regulator 1 OS=Mus musculus OX=10090 GN=Mcur1 PE=1 SV=1             | 0.376666667 |
| Nubpl    | Q9CWD8 | Iron-sulfur protein NUBPL OS=Mus musculus OX=10090 GN=Nubpl PE=1 SV=2                               | 0.516666667 |
| Adat1    | Q9JHI2 | tRNA-specific adenosine deaminase 1 OS=Mus musculus OX=10090 GN=Adat1 PE=1 SV=1                     | 0.845       |
| Cdkn1a   | P39689 | Cyclin-dependent kinase inhibitor 1 OS=Mus musculus OX=10090 GN=Cdkn1a PE=1 SV=4                    | 0.8         |

|          |        |                                                                                                |             |
|----------|--------|------------------------------------------------------------------------------------------------|-------------|
| Sdhd     | Q9CXV1 | Succinate dehydrogenase [ubiquinone] cytochrome b small subunit mitochondrial OS=Mus musculus  | 0.966666667 |
| Pik3ca   | P42337 | Phosphatidylinositol 4 5-bisphosphate 3-kinase catalytic subunit alpha isoform OS=Mus musculus | 0.89        |
| Tsen15   | Q8R3W5 | tRNA-splicing endonuclease subunit Sen15 OS=Mus musculus OX=10090 GN=Tsen15 PE=1 SV=1          | 0.946666667 |
| Cep63    | Q3UPP8 | Centrosomal protein of 63 kDa OS=Mus musculus OX=10090 GN=Cep63 PE=1 SV=2                      |             |
| Anapc13  | Q8R034 | Anaphase-promoting complex subunit 13 OS=Mus musculus OX=10090 GN=Anapc13 PE=3 SV=1            | 1.086666667 |
| Gjb3     | P28231 | Gap junction beta-3 protein OS=Mus musculus OX=10090 GN=Gjb3 PE=1 SV=1                         | 1.29        |
| Ndufb1   | P0DN34 | NADH dehydrogenase [ubiquinone] 1 beta subcomplex subunit 1 OS=Mus musculus OX=10090 GN=       | 1.056666667 |
| Pnir     | A2AJT4 | Arginine/serine-rich protein PNISR OS=Mus musculus OX=10090 GN=Pnir PE=1 SV=1                  |             |
| Prss2    | P07146 | Anionic trypsin-2 OS=Mus musculus OX=10090 GN=Prss2 PE=1 SV=1                                  | 0.486666667 |
| Slc16a13 | Q8CE94 | Monocarboxylate transporter 13 OS=Mus musculus OX=10090 GN=Slc16a13 PE=2 SV=1                  | 0.55        |
| Fam126a  | Q6P9N1 | Hyccin OS=Mus musculus OX=10090 GN=Fam126a PE=1 SV=3                                           | 1.025       |
| Ggh      | Q9Z0L8 | Gamma-glutamyl hydrolase OS=Mus musculus OX=10090 GN=Ggh PE=1 SV=2                             | 0.69        |
| Rdh13    | Q8CEE7 | Retinol dehydrogenase 13 OS=Mus musculus OX=10090 GN=Rdh13 PE=1 SV=1                           | 1.236666667 |
| Clk4     | O35493 | Dual specificity protein kinase CLK4 OS=Mus musculus OX=10090 GN=Clk4 PE=1 SV=1                |             |
| Sac3d1   | A6H687 | SAC3 domain-containing protein 1 OS=Mus musculus OX=10090 GN=Sac3d1 PE=1 SV=1                  |             |
| Cbx8     | Q9QXV1 | Chromobox protein homolog 8 OS=Mus musculus OX=10090 GN=Cbx8 PE=1 SV=1                         | 0.69        |
| Dtnbp1   | Q91WZ8 | Dysbindin OS=Mus musculus OX=10090 GN=Dtnbp1 PE=1 SV=1                                         |             |
| Haus4    | Q8BFT2 | HAUS augmin-like complex subunit 4 OS=Mus musculus OX=10090 GN=Haus4 PE=1 SV=1                 | 0.986666667 |
| Rapgef2  | Q8CHG7 | Rap guanine nucleotide exchange factor 2 OS=Mus musculus OX=10090 GN=Rapgef2 PE=1 SV=2         |             |
| Sdhaf4   | Q8BTE0 | Succinate dehydrogenase assembly factor 4 mitochondrial OS=Mus musculus OX=10090 GN=Sdhaf      | 0.92        |
| Phka2    | Q8BWJ3 | Phosphorylase b kinase regulatory subunit alpha liver isoform OS=Mus musculus OX=10090 GN=Ph   |             |
| Cd276    | Q8VE98 | CD276 antigen OS=Mus musculus OX=10090 GN=Cd276 PE=1 SV=1                                      | 0.925       |
| Slc25a15 | Q9WVD5 | Mitochondrial ornithine transporter 1 OS=Mus musculus OX=10090 GN=Slc25a15 PE=1 SV=1           | 1.24        |
| Slc35b2  | Q91ZN5 | Adenosine 3'-phospho 5'-phosphosulfate transporter 1 OS=Mus musculus OX=10090 GN=Slc35b2 P     | 0.99        |
| Rftn2    | Q8CHX7 | Raftlin-2 OS=Mus musculus OX=10090 GN=Rftn2 PE=1 SV=3                                          | 1.436666667 |
| Dmxl1    | Q6PNC0 | DmX-like protein 1 OS=Mus musculus OX=10090 GN=Dmxl1 PE=1 SV=1                                 |             |
| Bnip3l   | Q9Z2F7 | BCL2/adenovirus E1B 19 kDa protein-interacting protein 3-like OS=Mus musculus OX=10090 GN=Br   |             |
| Magee1   | Q6PCZ4 | Melanoma-associated antigen E1 OS=Mus musculus OX=10090 GN=Magee1 PE=1 SV=1                    | 12.56333333 |
| Wdr76    | A6PWY4 | WD repeat-containing protein 76 OS=Mus musculus OX=10090 GN=Wdr76 PE=1 SV=1                    |             |
| Gsdme    | Q9Z2D3 | Gasdermin-E OS=Mus musculus OX=10090 GN=Gsdme PE=1 SV=1                                        |             |
| Rabac1   | Q9Z0S9 | Prenylated Rab acceptor protein 1 OS=Mus musculus OX=10090 GN=Rabac1 PE=1 SV=1                 | 0.95        |
| Med13    | Q5SWW4 | Mediator of RNA polymerase II transcription subunit 13 OS=Mus musculus OX=10090 GN=Med13 P     |             |
| Rbpms    | Q9WVB0 | RNA-binding protein with multiple splicing OS=Mus musculus OX=10090 GN=Rbpms PE=1 SV=2         | 1.155       |
| Qsox1    | Q8BND5 | Sulfhydryl oxidase 1 OS=Mus musculus OX=10090 GN=Qsox1 PE=1 SV=1                               | 0.133333333 |



|          |        |                                                                                                 |             |
|----------|--------|-------------------------------------------------------------------------------------------------|-------------|
| Taf5     | Q8C092 | Transcription initiation factor TFIID subunit 5 OS=Mus musculus OX=10090 GN=Taf5 PE=1 SV=1      |             |
| Pcdh19   | Q80TF3 | Protocadherin-19 OS=Mus musculus OX=10090 GN=Pcdh19 PE=1 SV=3                                   | 1.44        |
| Borcs6   | Q9D6W8 | BLOC-1-related complex subunit 6 OS=Mus musculus OX=10090 GN=Borcs6 PE=1 SV=1                   |             |
| Aqp1     | Q02013 | Aquaporin-1 OS=Mus musculus OX=10090 GN=Aqp1 PE=1 SV=3                                          | 0.9         |
| Eml2     | Q7TNG5 | Echinoderm microtubule-associated protein-like 2 OS=Mus musculus OX=10090 GN=Eml2 PE=1 SV=      |             |
| Prmt6    | Q6NZB1 | Protein arginine N-methyltransferase 6 OS=Mus musculus OX=10090 GN=Prmt6 PE=1 SV=2              |             |
| Apoa1    | Q00623 | Apolipoprotein A-I OS=Mus musculus OX=10090 GN=Apoa1 PE=1 SV=2                                  | 0.066666667 |
| Hira     | Q61666 | Protein HIRA OS=Mus musculus OX=10090 GN=Hira PE=1 SV=3                                         | 0.11        |
| Mrps18a  | Q99N85 | 28S ribosomal protein S18a mitochondrial OS=Mus musculus OX=10090 GN=Mrps18a PE=2 SV=1          | 1.416666667 |
| Bloc1s2  | Q9CWG9 | Biogenesis of lysosome-related organelles complex 1 subunit 2 OS=Mus musculus OX=10090 GN=Blc   |             |
| Taf2     | Q8C176 | Transcription initiation factor TFIID subunit 2 OS=Mus musculus OX=10090 GN=Taf2 PE=2 SV=2      | 0.915       |
| Polr3d   | Q91WD1 | DNA-directed RNA polymerase III subunit RPC4 OS=Mus musculus OX=10090 GN=Polr3d PE=2 SV=2       |             |
| Tmsb4x   | P20065 | Thymosin beta-4 OS=Mus musculus OX=10090 GN=Tmsb4x PE=1 SV=1                                    | 2.91        |
| Nsl1     | Q8K305 | Kinetochore-associated protein NSL1 homolog OS=Mus musculus OX=10090 GN=Nsl1 PE=2 SV=1          |             |
| Znf706   | Q9D115 | Zinc finger protein 706 OS=Mus musculus OX=10090 GN=Znf706 PE=1 SV=1                            | 1.49        |
| Hsd12    | Q2TPA8 | Hydroxysteroid dehydrogenase-like protein 2 OS=Mus musculus OX=10090 GN=Hsd12 PE=1 SV=1         | 0.51        |
| FRRS1    | Q8K385 | Ferric-chelate reductase 1 OS=Mus musculus OX=10090 GN=FRRS1 PE=1 SV=1                          | 1.11        |
| Ca5b     | Q9QZA0 | Carbonic anhydrase 5B mitochondrial OS=Mus musculus OX=10090 GN=Ca5b PE=1 SV=2                  | 0.69        |
| Fam160a2 | Q3U2I3 | FTS and Hook-interacting protein OS=Mus musculus OX=10090 GN=Fam160a2 PE=1 SV=2                 |             |
| St3gal5  | O88829 | Lactosylceramide alpha-2 3-sialyltransferase OS=Mus musculus OX=10090 GN=St3gal5 PE=2 SV=2      |             |
| Tsen54   | Q8C2A2 | tRNA-splicing endonuclease subunit Sen54 OS=Mus musculus OX=10090 GN=Tsen54 PE=2 SV=2           |             |
| Cir1     | Q9DA19 | Corepressor interacting with RBPJ 1 OS=Mus musculus OX=10090 GN=Cir1 PE=1 SV=2                  | 1.386666667 |
| Itpr1l1  | A2ASA8 | Inositol 1 4 5-trisphosphate receptor-interacting protein-like 1 OS=Mus musculus OX=10090 GN=It |             |
| Atxn3    | Q9CVD2 | Ataxin-3 OS=Mus musculus OX=10090 GN=Atxn3 PE=1 SV=2                                            |             |
| Znrd1    | Q791N7 | DNA-directed RNA polymerase I subunit RPA12 OS=Mus musculus OX=10090 GN=Polr1h PE=1 SV=1        | 1.743333333 |
| Zbtb8os  | Q505B7 | Protein archease OS=Mus musculus OX=10090 GN=Zbtb8os PE=1 SV=2                                  | 1.08        |
| Atp5mpl  | P56379 | ATP synthase subunit ATP5MPL mitochondrial OS=Mus musculus OX=10090 GN=Atp5mpl PE=1 SV=         | 0.88        |
| Lgals8   | Q9JL15 | Galectin-8 OS=Mus musculus OX=10090 GN=Lgals8 PE=1 SV=1                                         |             |
| Cited2   | O35740 | Cbp/p300-interacting transactivator 2 OS=Mus musculus OX=10090 GN=Cited2 PE=1 SV=2              | 2.84        |
| Col4a2   | P08122 | Collagen alpha-2(IV) chain OS=Mus musculus OX=10090 GN=Col4a2 PE=1 SV=4                         |             |
| Rpl37    | Q9D823 | 60S ribosomal protein L37 OS=Mus musculus OX=10090 GN=Rpl37 PE=3 SV=3                           | 0.79        |
| Vrk3     | Q8K3G5 | Inactive serine/threonine-protein kinase VRK3 OS=Mus musculus OX=10090 GN=Vrk3 PE=1 SV=2        |             |
| Slc39a11 | Q8BWY7 | Zinc transporter ZIP11 OS=Mus musculus OX=10090 GN=Slc39a11 PE=1 SV=1                           |             |
| Dync2h1  | Q45VK7 | Cytoplasmic dynein 2 heavy chain 1 OS=Mus musculus OX=10090 GN=Dync2h1 PE=1 SV=1                | 0.9         |

|         |        |                                                                                                  |             |
|---------|--------|--------------------------------------------------------------------------------------------------|-------------|
| Trafd1  | Q3UDK1 | TRAF-type zinc finger domain-containing protein 1 OS=Mus musculus OX=10090 GN=Trafd1 PE=1 SV=    |             |
| Nckipsd | Q9ESJ4 | NCK-interacting protein with SH3 domain OS=Mus musculus OX=10090 GN=Nckipsd PE=1 SV=2            |             |
| Paip2b  | Q91W45 | Polyadenylate-binding protein-interacting protein 2B OS=Mus musculus OX=10090 GN=Paip2b PE= 0.57 |             |
| Pcgf5   | Q3UK78 | Polycomb group RING finger protein 5 OS=Mus musculus OX=10090 GN=Pcgf5 PE=1 SV=1                 | 0.67        |
| Ggta1   | P23336 | N-acetyllactosaminide alpha-1 3-galactosyltransferase OS=Mus musculus OX=10090 GN=Ggta1 PE=2     | 1.036666667 |
| Midn    | Q3TPJ7 | Midnolin OS=Mus musculus OX=10090 GN=Midn PE=2 SV=1                                              |             |
| Cotl1   | Q9CQJ6 | Coactosin-like protein OS=Mus musculus OX=10090 GN=Cotl1 PE=1 SV=3                               | 0.856666667 |
| Bap18   | Q9DCT6 | Chromatin complexes subunit BAP18 OS=Mus musculus OX=10090 GN=Bap18 PE=1 SV=1                    | 0.97        |
| Hpx     | Q91X72 | Hemopexin OS=Mus musculus OX=10090 GN=Hpx PE=1 SV=2                                              | 0.073333333 |
| Rpusd2  | Q149F1 | RNA pseudouridylate synthase domain-containing protein 2 OS=Mus musculus OX=10090 GN=Rpus        |             |
| Pank4   | Q80YV4 | 4'-phosphopantetheine phosphatase OS=Mus musculus OX=10090 GN=Pank4 PE=1 SV=2                    |             |
| Flcn    | Q8QZS3 | Folliculin OS=Mus musculus OX=10090 GN=Flcn PE=1 SV=1                                            | 0.62        |
| Ccdc80  | Q8R2G6 | Coiled-coil domain-containing protein 80 OS=Mus musculus OX=10090 GN=Ccdc80 PE=1 SV=2            | 0.566666667 |
| Ptgr2   | Q8VDQ1 | Prostaglandin reductase 2 OS=Mus musculus OX=10090 GN=Ptgr2 PE=1 SV=2                            |             |
| Tmbim1  | Q8BJZ3 | Protein lifeguard 3 OS=Mus musculus OX=10090 GN=Tmbim1 PE=1 SV=1                                 |             |
| Faap100 | A2ACJ2 | Fanconi anemia core complex-associated protein 100 OS=Mus musculus OX=10090 GN=Faap100 PE=       |             |
| Maf1    | Q9D0U6 | Repressor of RNA polymerase III transcription MAF1 homolog OS=Mus musculus OX=10090 GN=Maf       |             |
| Ndufa3  | Q9CQ91 | NADH dehydrogenase [ubiquinone] 1 alpha subcomplex subunit 3 OS=Mus musculus OX=10090 GN=        | 0.593333333 |
| Ripk2   | P58801 | Receptor-interacting serine/threonine-protein kinase 2 OS=Mus musculus OX=10090 GN=Ripk2 PE=     |             |
| Procr   | Q64695 | Endothelial protein C receptor OS=Mus musculus OX=10090 GN=Procr PE=1 SV=3                       |             |
| Hdac10  | Q6P3E7 | Polyamine deacetylase HDAC10 OS=Mus musculus OX=10090 GN=Hdac10 PE=2 SV=2                        | 0.925       |
| Oard1   | Q8R5F3 | ADP-ribose glycohydrolase OARD1 OS=Mus musculus OX=10090 GN=Oard1 PE=1 SV=2                      | 1.603333333 |
| Crtc3   | Q91X84 | CREB-regulated transcription coactivator 3 OS=Mus musculus OX=10090 GN=Crtc3 PE=1 SV=2           |             |
| Cmtm4   | Q8CJ61 | CKLF-like MARVEL transmembrane domain-containing protein 4 OS=Mus musculus OX=10090 GN=C         |             |
| Serinc3 | Q9QZI9 | Serine incorporator 3 OS=Mus musculus OX=10090 GN=Serinc3 PE=1 SV=2                              | 0.895       |
| Acap1   | Q8K2H4 | Arf-GAP with coiled-coil ANK repeat and PH domain-containing protein 1 OS=Mus musculus OX=10     | 170.0066667 |
| Wwtr1   | Q9EPK5 | WW domain-containing transcription regulator protein 1 OS=Mus musculus OX=10090 GN=Wwtr1         | 3.015       |
| Anapc10 | Q8K2H6 | Anaphase-promoting complex subunit 10 OS=Mus musculus OX=10090 GN=Anapc10 PE=1 SV=1              | 0.765       |
| Mier1   | Q5UAK0 | Mesoderm induction early response protein 1 OS=Mus musculus OX=10090 GN=Mier1 PE=1 SV=2          |             |
| Trim44  | Q9QXA7 | Tripartite motif-containing protein 44 OS=Mus musculus OX=10090 GN=Trim44 PE=1 SV=2              | 2.135       |
| Nudt7   | Q99P30 | Peroxisomal coenzyme A diphosphatase NUDT7 OS=Mus musculus OX=10090 GN=Nudt7 PE=1 SV=2           | 1.175       |
| Trim59  | Q922Y2 | Tripartite motif-containing protein 59 OS=Mus musculus OX=10090 GN=Trim59 PE=1 SV=2              |             |
| Fam92a  | Q8BP22 | Protein FAM92A OS=Mus musculus OX=10090 GN=Fam92a PE=1 SV=1                                      |             |
| Tfb1m   | Q8JZM0 | Dimethyladenosine transferase 1 mitochondrial OS=Mus musculus OX=10090 GN=Tfb1m PE=1 SV=         |             |

|          |        |                                                                                                  |             |
|----------|--------|--------------------------------------------------------------------------------------------------|-------------|
| Ccnd2    | P30280 | G1/S-specific cyclin-D2 OS=Mus musculus OX=10090 GN=Ccnd2 PE=1 SV=1                              |             |
| Rtkn2    | Q14B46 | Rhotekin-2 OS=Mus musculus OX=10090 GN=Rtkn2 PE=1 SV=2                                           |             |
| Fhdc1    | Q3ULZ2 | FH2 domain-containing protein 1 OS=Mus musculus OX=10090 GN=Fhdc1 PE=1 SV=3                      |             |
| Zbtb33   | Q8BN78 | Transcriptional regulator Kaiso OS=Mus musculus OX=10090 GN=Zbtb33 PE=1 SV=1                     |             |
| Card19   | Q9D1I2 | Caspase recruitment domain-containing protein 19 OS=Mus musculus OX=10090 GN=Card19 PE=1         | 1.456666667 |
| Mcoln1   | Q99J21 | Mucolipin-1 OS=Mus musculus OX=10090 GN=Mcoln1 PE=1 SV=1                                         |             |
|          | Q91W34 | RUS family member 1 OS=Mus musculus OX=10090 GN=Rusf1 PE=1 SV=1                                  | 1.24        |
| Tbc1d13  | Q8R3D1 | TBC1 domain family member 13 OS=Mus musculus OX=10090 GN=Tbc1d13 PE=1 SV=1                       | 1.99        |
| Iqcb1    | Q8BP00 | IQ calmodulin-binding motif-containing protein 1 OS=Mus musculus OX=10090 GN=Iqcb1 PE=1 SV=1     | 1.08        |
| Yipf6    | Q8BR70 | Protein YIPF6 OS=Mus musculus OX=10090 GN=Yipf6 PE=1 SV=1                                        |             |
| Spred1   | Q924S8 | Sprouty-related EVH1 domain-containing protein 1 OS=Mus musculus OX=10090 GN=Spred1 PE=1         |             |
| Mrpl17   | Q9D8P4 | 39S ribosomal protein L17 mitochondrial OS=Mus musculus OX=10090 GN=Mrpl17 PE=1 SV=1             | 1.966666667 |
| Msantd2  | Q6NZR2 | Myb/SANT-like DNA-binding domain-containing protein 2 OS=Mus musculus OX=10090 GN=Msantc         |             |
| Abcd1    | P48410 | ATP-binding cassette sub-family D member 1 OS=Mus musculus OX=10090 GN=Abcd1 PE=1 SV=1           | 1.7         |
| Prr11    | Q8BHE0 | Proline-rich protein 11 OS=Mus musculus OX=10090 GN=Prr11 PE=2 SV=1                              |             |
| Taf6l    | Q8R2K4 | TAF6-like RNA polymerase II p300/CBP-associated factor-associated factor 65 kDa subunit 6L OS=Ml | 2.035       |
| Zfp39    | Q02525 | Zinc finger protein 39 OS=Mus musculus OX=10090 GN=Zfp39 PE=2 SV=2                               |             |
| Ubtd2    | Q6PGH0 | Ubiquitin domain-containing protein 2 OS=Mus musculus OX=10090 GN=Ubtd2 PE=2 SV=1                | 5.56        |
|          | Q5EBG8 | Uncharacterized protein C1orf50 homolog OS=Mus musculus OX=10090 PE=1 SV=1                       | 1.033333333 |
| Arl6ip1  | Q9JKW0 | ADP-ribosylation factor-like protein 6-interacting protein 1 OS=Mus musculus OX=10090 GN=Arl6ip1 | 0.833333333 |
| Bloc1s4  | Q8VED2 | Biogenesis of lysosome-related organelles complex 1 subunit 4 OS=Mus musculus OX=10090 GN=Blc    |             |
| Smdt1    | Q9DB10 | Essential MCU regulator mitochondrial OS=Mus musculus OX=10090 GN=Smdt1 PE=1 SV=1                | 0.77        |
| Tspan9   | Q8BJU2 | Tetraspanin-9 OS=Mus musculus OX=10090 GN=Tspan9 PE=1 SV=1                                       | 4.743333333 |
| Cnot6l   | Q8VEG6 | CCR4-NOT transcription complex subunit 6-like OS=Mus musculus OX=10090 GN=Cnot6l PE=1 SV=2       |             |
| Znhit3   | Q9CQK1 | Zinc finger HIT domain-containing protein 3 OS=Mus musculus OX=10090 GN=Znhit3 PE=1 SV=1         | 0.32        |
| Mad2l1bp | Q9DCX1 | MAD2L1-binding protein OS=Mus musculus OX=10090 GN=Mad2l1bp PE=1 SV=2                            |             |
| Eif2ak4  | Q9QZ05 | eIF-2-alpha kinase GCN2 OS=Mus musculus OX=10090 GN=Eif2ak4 PE=1 SV=2                            |             |
| Jtb      | O88824 | Protein JTB OS=Mus musculus OX=10090 GN=Jtb PE=1 SV=1                                            | 1.23        |
| Arl2bp   | Q9D385 | ADP-ribosylation factor-like protein 2-binding protein OS=Mus musculus OX=10090 GN=Arl2bp PE=1   | 0.953333333 |
| Armc9    | Q9D2I5 | LisH domain-containing protein ARMC9 OS=Mus musculus OX=10090 GN=Armc9 PE=1 SV=1                 | 1.11        |
| Mtrf1l   | Q8BJU9 | Peptide chain release factor 1-like mitochondrial OS=Mus musculus OX=10090 GN=Mtrf1l PE=2 SV=1   | 0.645       |
| Chmp2a   | Q9DB34 | Charged multivesicular body protein 2a OS=Mus musculus OX=10090 GN=Chmp2a PE=1 SV=1              |             |
| Acot13   | Q9CQR4 | Acyl-coenzyme A thioesterase 13 OS=Mus musculus OX=10090 GN=Acot13 PE=1 SV=1                     | 1.43        |
| Pusl1    | A2ADA5 | tRNA pseudouridine synthase-like 1 OS=Mus musculus OX=10090 GN=Pusl1 PE=1 SV=1                   | 0.99        |

|          |        |                                                                                                     |             |
|----------|--------|-----------------------------------------------------------------------------------------------------|-------------|
| Epg5     | Q80TA9 | Ectopic P granules protein 5 homolog OS=Mus musculus OX=10090 GN=Epg5 PE=1 SV=2                     |             |
| Scrn3    | Q3TMH2 | Secernin-3 OS=Mus musculus OX=10090 GN=Scrn3 PE=1 SV=1                                              |             |
| Tmem161a | Q8VCA6 | Transmembrane protein 161A OS=Mus musculus OX=10090 GN=Tmem161a PE=2 SV=1                           | 0.576666667 |
| Plekhg5  | Q66T02 | Pleckstrin homology domain-containing family G member 5 OS=Mus musculus OX=10090 GN=Plekl           | 0.89        |
| Mpnd     | Q3TV65 | MPN domain-containing protein OS=Mus musculus OX=10090 GN=Mpnd PE=2 SV=2                            |             |
| Plcd3    | Q8K2J0 | 1-phosphatidylinositol 4 5-bisphosphate phosphodiesterase delta-3 OS=Mus musculus OX=10090 GN=Plcd3 |             |
| Adnp2    | Q8CHC8 | Activity-dependent neuroprotector homeobox protein 2 OS=Mus musculus OX=10090 GN=Adnp2              |             |
| Mettl14  | Q3UIK4 | N6-adenosine-methyltransferase non-catalytic subunit OS=Mus musculus OX=10090 GN=Mettl14            | P 0.505     |
| Cdyl     | Q9WTK2 | Chromodomain Y-like protein OS=Mus musculus OX=10090 GN=Cdyl PE=1 SV=1                              |             |
| Kiaa2013 | Q91X21 | Uncharacterized protein KIAA2013 OS=Mus musculus OX=10090 GN=Kiaa2013 PE=1 SV=1                     | 1.175       |
| Plaat3   | Q8R3U1 | Phospholipase A and acyltransferase 3 OS=Mus musculus OX=10090 GN=Plaat3 PE=1 SV=2                  |             |
| Ube2w    | Q8VDW4 | Ubiquitin-conjugating enzyme E2 W OS=Mus musculus OX=10090 GN=Ube2w PE=1 SV=1                       |             |
| Cers4    | Q9D6J1 | Ceramide synthase 4 OS=Mus musculus OX=10090 GN=Cers4 PE=1 SV=1                                     | 0.743333333 |
| Uxt      | Q9WTZ0 | Protein UXT OS=Mus musculus OX=10090 GN=Uxt PE=1 SV=2                                               | 0.885       |
| Elovl5   | Q8BHI7 | Elongation of very long chain fatty acids protein 5 OS=Mus musculus OX=10090 GN=Elovl5 PE=1 SV=1    | 0.895       |
| Sesn1    | P58006 | Sestrin-1 OS=Mus musculus OX=10090 GN=Sesn1 PE=1 SV=3                                               |             |
| Tonsl    | Q6NZL6 | Tonsoku-like protein OS=Mus musculus OX=10090 GN=Tonsl PE=1 SV=2                                    |             |
| Pnkd     | Q69ZP3 | Probable hydrolase PNKD OS=Mus musculus OX=10090 GN=Pnkd PE=1 SV=2                                  |             |
| Ccdc97   | Q9DBT3 | Coiled-coil domain-containing protein 97 OS=Mus musculus OX=10090 GN=Ccdc97 PE=1 SV=1               |             |
| Cry1     | P97784 | Cryptochrome-1 OS=Mus musculus OX=10090 GN=Cry1 PE=1 SV=1                                           |             |
| Svbp     | Q99LQ4 | Small vasohibin-binding protein OS=Mus musculus OX=10090 GN=Svbp PE=1 SV=1                          |             |
|          | Q9CQ90 | Uncharacterized protein C9orf85 homolog OS=Mus musculus OX=10090 GN=                                |             |
| Smim12   | Q78RX3 | Small integral membrane protein 12 OS=Mus musculus OX=10090 GN=Smim12 PE=3 SV=1                     |             |
| Dlg5     | E9Q9R9 | Disks large homolog 5 OS=Mus musculus OX=10090 GN=Dlg5 PE=1 SV=1                                    | 1.17        |
| Trub2    | Q91WG3 | Mitochondrial mRNA pseudouridine synthase Trub2 OS=Mus musculus OX=10090 GN=Trub2 PE=2 SV=1         | 1.036666667 |
| Ptcd1    | Q8C2E4 | Pentatricopeptide repeat-containing protein 1 mitochondrial OS=Mus musculus OX=10090 GN=Ptcd1       |             |
| Trim35   | Q8C006 | Tripartite motif-containing protein 35 OS=Mus musculus OX=10090 GN=Trim35 PE=1 SV=2                 | 0.865       |
| Gtf2h4   | O70422 | General transcription factor IIH subunit 4 OS=Mus musculus OX=10090 GN=Gtf2h4 PE=1 SV=1             |             |
| Rassf8   | Q8CJ96 | Ras association domain-containing protein 8 OS=Mus musculus OX=10090 GN=Rassf8 PE=2 SV=1            | 0.476666667 |
| Rgs10    | Q9CQE5 | Regulator of G-protein signaling 10 OS=Mus musculus OX=10090 GN=Rgs10 PE=1 SV=1                     |             |
| Dym      | Q8CHY3 | Dymeclin OS=Mus musculus OX=10090 GN=Dym PE=1 SV=1                                                  | 0.923333333 |
| Atrn     | Q9WU60 | Attractin OS=Mus musculus OX=10090 GN=Atrn PE=1 SV=3                                                |             |
| Aph1a    | Q8BVF7 | Gamma-secretase subunit APH-1A OS=Mus musculus OX=10090 GN=Aph1a PE=1 SV=2                          |             |
| Syngr2   | O55101 | Synaptogyrin-2 OS=Mus musculus OX=10090 GN=Syngr2 PE=2 SV=1                                         | 0.643333333 |

|          |        |                                                                                                  |             |
|----------|--------|--------------------------------------------------------------------------------------------------|-------------|
| Ttc26    | Q8BS45 | Intraflagellar transport protein 56 OS=Mus musculus OX=10090 GN=Ttc26 PE=1 SV=1                  | 1.14        |
| Cyb561d2 | Q9WUE3 | Cytochrome b561 domain-containing protein 2 OS=Mus musculus OX=10090 GN=Cyb561d2 PE=1 SV=1       |             |
|          | Q8CIL4 | Uncharacterized protein C1orf131 homolog OS=Mus musculus OX=10090 PE=1 SV=1                      |             |
| Tmem258  | P61166 | Transmembrane protein 258 OS=Mus musculus OX=10090 GN=Tmem258 PE=1 SV=1                          | 1.063333333 |
| Haus2    | Q9CQS9 | HAUS augmin-like complex subunit 2 OS=Mus musculus OX=10090 GN=Haus2 PE=2 SV=1                   | 0.59        |
| Tceal9   | Q9DD24 | Transcription elongation factor A protein-like 9 OS=Mus musculus OX=10090 GN=Tceal9 PE=3 SV=1    |             |
| Ddx11    | Q6AXC6 | ATP-dependent DNA helicase DDX11 OS=Mus musculus OX=10090 GN=Ddx11 PE=1 SV=2                     |             |
| Actr5    | Q80US4 | Actin-related protein 5 OS=Mus musculus OX=10090 GN=Actr5 PE=1 SV=3                              |             |
| Phrf1    | A6H619 | PHD and RING finger domain-containing protein 1 OS=Mus musculus OX=10090 GN=Phrf1 PE=1 SV=1.5    |             |
| Rce1     | P57791 | CAAX prenyl protease 2 OS=Mus musculus OX=10090 GN=Rce1 PE=2 SV=1                                |             |
| Mrpl48   | Q8JZS9 | 39S ribosomal protein L48 mitochondrial OS=Mus musculus OX=10090 GN=Mrpl48 PE=1 SV=1             | 0.906666667 |
| Tmem9    | Q9CR23 | Transmembrane protein 9 OS=Mus musculus OX=10090 GN=Tmem9 PE=1 SV=1                              | 1.075       |
| Parp4    | E9PYK3 | Protein mono-ADP-ribosyltransferase PARP4 OS=Mus musculus OX=10090 GN=Parp4 PE=1 SV=1            | 0.395       |
| Tpst1    | O70281 | Protein-tyrosine sulfotransferase 1 OS=Mus musculus OX=10090 GN=Tpst1 PE=1 SV=1                  |             |
| Tmem245  | B1AZA5 | Transmembrane protein 245 OS=Mus musculus OX=10090 GN=Tmem245 PE=1 SV=1                          | 0.743333333 |
| Yeats4   | Q9CR11 | YEATS domain-containing protein 4 OS=Mus musculus OX=10090 GN=Yeats4 PE=2 SV=1                   | 1.4         |
| Zfand1   | Q8BFR6 | AN1-type zinc finger protein 1 OS=Mus musculus OX=10090 GN=Zfand1 PE=1 SV=1                      | 0.84        |
| Ccdc32   | Q8BS39 | Coiled-coil domain-containing protein 32 OS=Mus musculus OX=10090 GN=Ccdc32 PE=2 SV=2            |             |
| Pphln1   | Q8K2H1 | Periphilin-1 OS=Mus musculus OX=10090 GN=Pphln1 PE=1 SV=1                                        |             |
| Emc6     | Q9CQW0 | ER membrane protein complex subunit 6 OS=Mus musculus OX=10090 GN=Emc6 PE=1 SV=1                 | 0.963333333 |
| Map2k7   | Q8CE90 | Dual specificity mitogen-activated protein kinase kinase 7 OS=Mus musculus OX=10090 GN=Map2k7    |             |
| Pkp4     | Q68FH0 | Plakophilin-4 OS=Mus musculus OX=10090 GN=Pkp4 PE=1 SV=1                                         |             |
| Ctnnd2   | O35927 | Catenin delta-2 OS=Mus musculus OX=10090 GN=Ctnnd2 PE=1 SV=1                                     |             |
| Coq8b    | Q566J8 | Atypical kinase COQ8B mitochondrial OS=Mus musculus OX=10090 GN=Coq8b PE=1 SV=1                  | 2.475       |
| Tmem19   | Q91W52 | Transmembrane protein 19 OS=Mus musculus OX=10090 GN=Tmem19 PE=1 SV=1                            | 0.88        |
| Lmf1     | Q3U3R4 | Lipase maturation factor 1 OS=Mus musculus OX=10090 GN=Lmf1 PE=1 SV=1                            |             |
| Trex1    | Q91XB0 | Three-prime repair exonuclease 1 OS=Mus musculus OX=10090 GN=Trex1 PE=1 SV=2                     |             |
| Lin54    | Q571G4 | Protein lin-54 homolog OS=Mus musculus OX=10090 GN=Lin54 PE=2 SV=2                               |             |
| Pdzd11   | Q9CZG9 | PDZ domain-containing protein 11 OS=Mus musculus OX=10090 GN=Pdzd11 PE=1 SV=1                    |             |
| Alas1    | Q8VC19 | 5-aminolevulinate synthase nonspecific mitochondrial OS=Mus musculus OX=10090 GN=Alas1 PE=1 SV=1 |             |
| Znf131   | Q8K3J5 | Zinc finger protein 131 OS=Mus musculus OX=10090 GN=Znf131 PE=1 SV=1                             |             |
| Slc30a4  | O35149 | Zinc transporter 4 OS=Mus musculus OX=10090 GN=Slc30a4 PE=1 SV=2                                 |             |
| Ubac1    | Q8VDI7 | Ubiquitin-associated domain-containing protein 1 OS=Mus musculus OX=10090 GN=Ubac1 PE=1 SV=1     | 0.963333333 |
| Ppm1l    | Q8BHN0 | Protein phosphatase 1L OS=Mus musculus OX=10090 GN=Ppm1l PE=1 SV=1                               |             |



|         |        |                                                                                                                |             |
|---------|--------|----------------------------------------------------------------------------------------------------------------|-------------|
| Fry     | E9Q8I9 | Protein furry homolog OS=Mus musculus OX=10090 GN=Fry PE=1 SV=1                                                | 228.0233333 |
| Rad17   | Q6NXW6 | Cell cycle checkpoint protein RAD17 OS=Mus musculus OX=10090 GN=Rad17 PE=1 SV=2                                |             |
| Atg13   | Q91YI1 | Autophagy-related protein 13 OS=Mus musculus OX=10090 GN=Atg13 PE=1 SV=2                                       |             |
| Cox7b   | P56393 | Cytochrome c oxidase subunit 7B mitochondrial OS=Mus musculus OX=10090 GN=Cox7b PE=3 SV= 0.9                   |             |
| Retreg2 | Q6NS82 | Reticulophagy regulator 2 OS=Mus musculus OX=10090 GN=Retreg2 PE=1 SV=2                                        |             |
| Vma21   | Q78T54 | Vacuolar ATPase assembly integral membrane protein Vma21 OS=Mus musculus OX=10090 GN=Vma21 PE=1 SV=1           | 0.393333333 |
| Arid4a  | F8VPQ2 | AT-rich interactive domain-containing protein 4A OS=Mus musculus OX=10090 GN=Arid4a PE=1 SV=1                  |             |
| Chmp1b1 | Q99LU0 | Charged multivesicular body protein 1b-1 OS=Mus musculus OX=10090 GN=Chmp1b1 PE=1 SV=1                         | 1.6         |
| Rhbdd2  | Q8VEK2 | Rhomboid domain-containing protein 2 OS=Mus musculus OX=10090 GN=Rhbdd2 PE=1 SV=1                              |             |
| Hid1    | Q8R1F6 | Protein HID1 OS=Mus musculus OX=10090 GN=Hid1 PE=1 SV=1                                                        |             |
|         | Q3TTL0 | Uncharacterized protein C3orf38 homolog OS=Mus musculus OX=10090 GN=Q3TTL0 PE=2 SV=1                           |             |
| Slc35a1 | Q61420 | CMP-sialic acid transporter OS=Mus musculus OX=10090 GN=Slc35a1 PE=1 SV=2                                      |             |
| Skp2    | Q9Z0Z3 | S-phase kinase-associated protein 2 OS=Mus musculus OX=10090 GN=Skp2 PE=1 SV=1                                 |             |
| Hcls1   | P49710 | Hematopoietic lineage cell-specific protein OS=Mus musculus OX=10090 GN=Hcls1 PE=1 SV=2                        | 0.82        |
| Slc14a1 | Q8VHL0 | Urea transporter 1 OS=Mus musculus OX=10090 GN=Slc14a1 PE=1 SV=2                                               | 0.99        |
| Cep97   | Q9CZ62 | Centrosomal protein of 97 kDa OS=Mus musculus OX=10090 GN=Cep97 PE=1 SV=1                                      |             |
| Tmem192 | Q9CXT7 | Transmembrane protein 192 OS=Mus musculus OX=10090 GN=Tmem192 PE=1 SV=1                                        |             |
| Atg12   | Q9CQY1 | Ubiquitin-like protein ATG12 OS=Mus musculus OX=10090 GN=Atg12 PE=1 SV=1                                       | 0.913333333 |
| Stxbp4  | Q9WV89 | Syntaxin-binding protein 4 OS=Mus musculus OX=10090 GN=Stxbp4 PE=1 SV=1                                        |             |
| Afg1l   | Q3V384 | AFG1-like ATPase OS=Mus musculus OX=10090 GN=Afg1l PE=1 SV=1                                                   |             |
| Sp2     | Q9D2H6 | Transcription factor Sp2 OS=Mus musculus OX=10090 GN=Sp2 PE=2 SV=2                                             |             |
| Pnpla2  | Q8BJ56 | Patatin-like phospholipase domain-containing protein 2 OS=Mus musculus OX=10090 GN=Pnpla2 PE=1 SV=1            |             |
| Mt-Cyb  | P00158 | Cytochrome b OS=Mus musculus OX=10090 GN=Mt-Cyb PE=1 SV=1                                                      | 0.966666667 |
| Cept1   | Q8BGS7 | Choline/ethanolaminephosphotransferase 1 OS=Mus musculus OX=10090 GN=Cept1 PE=1 SV=1                           | 0.693333333 |
| Ar      | P19091 | Androgen receptor OS=Mus musculus OX=10090 GN=Ar PE=1 SV=1                                                     |             |
| Baz2a   | Q91YE5 | Bromodomain adjacent to zinc finger domain protein 2A OS=Mus musculus OX=10090 GN=Baz2a PE=1 SV=1              |             |
| Bcorl1  | A2AQH4 | BCL-6 corepressor-like protein 1 OS=Mus musculus OX=10090 GN=Bcorl1 PE=2 SV=1                                  | 25.955      |
| Slc35a3 | Q8R1T4 | UDP-N-acetylglucosamine transporter OS=Mus musculus OX=10090 GN=Slc35a3 PE=2 SV=1                              |             |
| Nagpa   | Q8BJ48 | N-acetylglucosamine-1-phosphodiester alpha-N-acetylglucosaminidase OS=Mus musculus OX=10090 GN=Nagpa PE=1 SV=1 |             |
| Cpn1    | Q9JJN5 | Carboxypeptidase N catalytic chain OS=Mus musculus OX=10090 GN=Cpn1 PE=1 SV=1                                  |             |
| Ahsg    | P29699 | Alpha-2-HS-glycoprotein OS=Mus musculus OX=10090 GN=Ahsg PE=1 SV=1                                             | 0.09        |
| Ajuba   | Q91XC0 | LIM domain-containing protein ajuba OS=Mus musculus OX=10090 GN=Ajuba PE=1 SV=1                                |             |
| Aptx    | Q7TQC5 | Aprataxin OS=Mus musculus OX=10090 GN=Aptx PE=1 SV=2                                                           |             |
| Lin9    | Q8C735 | Protein lin-9 homolog OS=Mus musculus OX=10090 GN=Lin9 PE=1 SV=2                                               | 0.443333333 |

|          |        |                                                                                                                          |             |
|----------|--------|--------------------------------------------------------------------------------------------------------------------------|-------------|
| Nfkbia   | Q9Z1E3 | NF-kappa-B inhibitor alpha OS=Mus musculus OX=10090 GN=Nfkbia PE=1 SV=2                                                  |             |
| Chmp1b2  | Q9CQD4 | Charged multivesicular body protein 1b-2 OS=Mus musculus OX=10090 GN=Chmp1b2 PE=2 SV=2                                   | 1.046666667 |
| Fam185a  | Q7TPD2 | Protein FAM185A OS=Mus musculus OX=10090 GN=Fam185a PE=2 SV=1                                                            |             |
| B4galt1  | P15535 | Beta-1 4-galactosyltransferase 1 OS=Mus musculus OX=10090 GN=B4galt1 PE=1 SV=1                                           |             |
| Scg2     | Q03517 | Secretogranin-2 OS=Mus musculus OX=10090 GN=Scg2 PE=1 SV=1                                                               | 0.845       |
| Rfx5     | Q9JL61 | DNA-binding protein Rfx5 OS=Mus musculus OX=10090 GN=Rfx5 PE=1 SV=2                                                      |             |
| Ift46    | Q9DB07 | Intraflagellar transport protein 46 homolog OS=Mus musculus OX=10090 GN=Ift46 PE=1 SV=1                                  |             |
| Zkscan1  | Q8BGS3 | Zinc finger protein with KRAB and SCAN domains 1 OS=Mus musculus OX=10090 GN=Zkscan1 PE=2 SV=1                           |             |
| Abl2     | Q4JIM5 | Tyrosine-protein kinase ABL2 OS=Mus musculus OX=10090 GN=Abl2 PE=1 SV=1                                                  |             |
| Pou2f1   | P25425 | POU domain class 2 transcription factor 1 OS=Mus musculus OX=10090 GN=Pou2f1 PE=1 SV=3                                   |             |
| Serpina7 | P61939 | Thyroxine-binding globulin OS=Mus musculus OX=10090 GN=Serpina7 PE=2 SV=1                                                | 0.01        |
| Banp     | Q8VBU8 | Protein BANP OS=Mus musculus OX=10090 GN=Banp PE=1 SV=1                                                                  |             |
| Nlrp4f   | Q66X05 | NACHT LRR and PYD domains-containing protein 4F OS=Mus musculus OX=10090 GN=Nlrp4f PE=2 SV=1                             |             |
| Nsrp1    | Q5NCR9 | Nuclear speckle splicing regulatory protein 1 OS=Mus musculus OX=10090 GN=Nsrp1 PE=1 SV=1                                | 0.955       |
| Sh2d4b   | A6X942 | SH2 domain-containing protein 4B OS=Mus musculus OX=10090 GN=Sh2d4b PE=2 SV=1                                            |             |
| Alg8     | Q6P8H8 | Probable dolichyl pyrophosphate Glc1Man9GlcNAc2 alpha-1 3-glucosyltransferase OS=Mus musculus OX=10090 GN=Alg8 PE=1 SV=1 | 0.54        |
| Fancl    | Q9CR14 | E3 ubiquitin-protein ligase FANCL OS=Mus musculus OX=10090 GN=Fancl PE=1 SV=1                                            |             |
| Dgke     | Q9R1C6 | Diacylglycerol kinase epsilon OS=Mus musculus OX=10090 GN=Dgke PE=1 SV=1                                                 | 1.205       |
| Vps8     | Q0P5W1 | Vacuolar protein sorting-associated protein 8 homolog OS=Mus musculus OX=10090 GN=Vps8 PE=1 SV=1                         |             |
| Actrt2   | Q9D9L5 | Actin-related protein T2 OS=Mus musculus OX=10090 GN=Actrt2 PE=2 SV=1                                                    |             |
| Snx24    | Q9CRB0 | Sorting nexin-24 OS=Mus musculus OX=10090 GN=Snx24 PE=1 SV=1                                                             | 0.86        |
| Thap12   | Q9CUX1 | 52 kDa repressor of the inhibitor of the protein kinase OS=Mus musculus OX=10090 GN=Thap12 PE=1 SV=1                     |             |
| Orc1     | Q9Z1N2 | Origin recognition complex subunit 1 OS=Mus musculus OX=10090 GN=Orc1 PE=1 SV=2                                          |             |
| Oasl2    | Q9Z2F2 | 2'-5'-oligoadenylate synthase-like protein 2 OS=Mus musculus OX=10090 GN=Oasl2 PE=1 SV=2                                 | 0.016666667 |
| Kif27    | Q7M6Z4 | Kinesin-like protein KIF27 OS=Mus musculus OX=10090 GN=Kif27 PE=1 SV=1                                                   | 0.625       |
| Atxn7    | Q8R4I1 | Ataxin-7 OS=Mus musculus OX=10090 GN=Atxn7 PE=1 SV=2                                                                     | 4.52        |
| Inpp5b   | Q8K337 | Type II inositol 1 4 5-trisphosphate 5-phosphatase OS=Mus musculus OX=10090 GN=Inpp5b PE=1 SV=1                          |             |
| NIgn4l   | B0F2B4 | Neurologin 4-like OS=Mus musculus OX=10090 GN=NIgn4l PE=1 SV=1                                                           |             |
| Ncoa6    | Q9JL19 | Nuclear receptor coactivator 6 OS=Mus musculus OX=10090 GN=Ncoa6 PE=1 SV=1                                               | 0.535       |
| Cnr2     | P47936 | Cannabinoid receptor 2 OS=Mus musculus OX=10090 GN=Cnr2 PE=1 SV=1                                                        | 0.236666667 |
| Kdm1b    | Q8CIG3 | Lysine-specific histone demethylase 1B OS=Mus musculus OX=10090 GN=Kdm1b PE=1 SV=1                                       |             |
| Rad51ap1 | Q8C551 | RAD51-associated protein 1 OS=Mus musculus OX=10090 GN=Rad51ap1 PE=1 SV=2                                                |             |
| Cbfa2t2  | O70374 | Protein CBFA2T2 OS=Mus musculus OX=10090 GN=Cbfa2t2 PE=1 SV=3                                                            |             |
| Smcr8    | Q3UMB5 | Guanine nucleotide exchange protein SMCR8 OS=Mus musculus OX=10090 GN=Smcr8 PE=1 SV=2                                    |             |

|         |        |                                                                                                  |             |
|---------|--------|--------------------------------------------------------------------------------------------------|-------------|
| Slc46a2 | Q8CA03 | Thymic stromal cotransporter protein OS=Mus musculus OX=10090 GN=Slc46a2 PE=1 SV=2               |             |
| Xpc     | P51612 | DNA repair protein complementing XP-C cells homolog OS=Mus musculus OX=10090 GN=Xpc PE=1         |             |
| Zdhhc6  | Q9CPV7 | Palmitoyltransferase ZDHHC6 OS=Mus musculus OX=10090 GN=Zdhhc6 PE=1 SV=1                         |             |
| Csmd3   | Q80T79 | CUB and sushi domain-containing protein 3 OS=Mus musculus OX=10090 GN=Csmd3 PE=1 SV=3            |             |
| Tmem222 | Q8BVA2 | Transmembrane protein 222 OS=Mus musculus OX=10090 GN=Tmem222 PE=1 SV=1                          | 1.77        |
| Vat1l   | Q80TB8 | Synaptic vesicle membrane protein VAT-1 homolog-like OS=Mus musculus OX=10090 GN=Vat1l PE=       |             |
| Kif18a  | Q91WD7 | Kinesin-like protein KIF18A OS=Mus musculus OX=10090 GN=Kif18a PE=2 SV=1                         | 0.656666667 |
| Tex15   | F8VPN2 | Testis-expressed protein 15 OS=Mus musculus OX=10090 GN=Tex15 PE=2 SV=1                          |             |
| Gcnt4   | E9Q649 | Beta-1 3-galactosyl-O-glycosyl-glycoprotein beta-1 6-N-acetylglucosaminyltransferase 4 OS=Mus mu | 0.475       |
| Gzf1    | Q4VBD9 | GNF-inducible zinc finger protein 1 OS=Mus musculus OX=10090 GN=Gzf1 PE=1 SV=2                   |             |
| Acp6    | Q8BP40 | Lysophosphatidic acid phosphatase type 6 OS=Mus musculus OX=10090 GN=Acp6 PE=1 SV=1              | 0.62        |
| Abhd16a | Q9Z1Q2 | Phosphatidylserine lipase ABHD16A OS=Mus musculus OX=10090 GN=Abhd16a PE=1 SV=3                  |             |
| Adgra3  | Q7TT36 | Adhesion G protein-coupled receptor A3 OS=Mus musculus OX=10090 GN=Adgra3 PE=2 SV=3              | 0.896666667 |
| Trak1   | Q6PD31 | Trafficking kinesin-binding protein 1 OS=Mus musculus OX=10090 GN=Trak1 PE=1 SV=1                |             |
| Myrip   | Q8K3I4 | Rab effector MyRIP OS=Mus musculus OX=10090 GN=Myrip PE=1 SV=1                                   | 0.105       |
| Lrch1   | P62046 | Leucine-rich repeat and calponin homology domain-containing protein 1 OS=Mus musculus OX=10      |             |
| Dnah8   | Q91XQ0 | Dynein heavy chain 8 axonemal OS=Mus musculus OX=10090 GN=Dnah8 PE=1 SV=2                        | 0.92        |
| Plch1   | Q4KWH5 | 1-phosphatidylinositol 4 5-bisphosphate phosphodiesterase eta-1 OS=Mus musculus OX=10090 GN      |             |
| Pp2d1   | Q8BVT6 | Protein phosphatase 2C-like domain-containing protein 1 OS=Mus musculus OX=10090 GN=Pp2d1        | 0.98        |
| Mamdc4  | A2AJA7 | Apical endosomal glycoprotein OS=Mus musculus OX=10090 GN=Mamdc4 PE=3 SV=1                       |             |
| Tada3   | Q8R0L9 | Transcriptional adapter 3 OS=Mus musculus OX=10090 GN=Tada3 PE=1 SV=1                            |             |
| Fas     | P25446 | Tumor necrosis factor receptor superfamily member 6 OS=Mus musculus OX=10090 GN=Fas PE=1 SV=     |             |
| Limk2   | O54785 | LIM domain kinase 2 OS=Mus musculus OX=10090 GN=Limk2 PE=1 SV=2                                  |             |
| Ubn2    | Q80WC1 | Ubinuclein-2 OS=Mus musculus OX=10090 GN=Ubn2 PE=1 SV=2                                          | 0.886666667 |
| Pigh    | Q5M9N4 | Phosphatidylinositol N-acetylglucosaminyltransferase subunit H OS=Mus musculus OX=10090 GN=      |             |
| Mob2    | Q8VI63 | MOB kinase activator 2 OS=Mus musculus OX=10090 GN=Mob2 PE=1 SV=1                                |             |
| Fem1c   | Q8CEF1 | Protein fem-1 homolog C OS=Mus musculus OX=10090 GN=Fem1c PE=2 SV=1                              |             |
| Elavl3  | Q60900 | ELAV-like protein 3 OS=Mus musculus OX=10090 GN=Elavl3 PE=1 SV=1                                 | 1.775       |
| Tada1   | Q99LM9 | Transcriptional adapter 1 OS=Mus musculus OX=10090 GN=Tada1 PE=2 SV=1                            |             |
| Agbl3   | Q8CDP0 | Cytosolic carboxypeptidase 3 OS=Mus musculus OX=10090 GN=Agbl3 PE=1 SV=1                         | 235.3933333 |
| Skint3  | A7TZF0 | Selection and upkeep of intraepithelial T-cells protein 3 OS=Mus musculus OX=10090 GN=Skint3 PE  | 0.793333333 |
| Cdc14a  | Q6GQT0 | Dual specificity protein phosphatase CDC14A OS=Mus musculus OX=10090 GN=Cdc14a PE=1 SV=2         |             |
| Tcf7    | Q00417 | Transcription factor 7 OS=Mus musculus OX=10090 GN=Tcf7 PE=1 SV=2                                |             |
| Tcf7l1  | Q9Z1J1 | Transcription factor 7-like 1 OS=Mus musculus OX=10090 GN=Tcf7l1 PE=1 SV=2                       |             |

|          |        |                                                                                                |             |
|----------|--------|------------------------------------------------------------------------------------------------|-------------|
| Tcf7l2   | Q924A0 | Transcription factor 7-like 2 OS=Mus musculus OX=10090 GN=Tcf7l2 PE=1 SV=2                     |             |
| Lef1     | P27782 | Lymphoid enhancer-binding factor 1 OS=Mus musculus OX=10090 GN=Lef1 PE=1 SV=1                  |             |
| Ryr1     | E9PZQ0 | Ryanodine receptor 1 OS=Mus musculus OX=10090 GN=Ryr1 PE=1 SV=1                                | 0.89        |
| Tex47    | Q9D5W8 | Testis-expressed protein 47 OS=Mus musculus OX=10090 GN=Tex47 PE=2 SV=1                        | 0.785       |
| Mrm3     | Q5ND52 | rRNA methyltransferase 3 mitochondrial OS=Mus musculus OX=10090 GN=Mrm3 PE=2 SV=1              | 0.23        |
| Crtc2    | Q3U182 | CREB-regulated transcription coactivator 2 OS=Mus musculus OX=10090 GN=Crtc2 PE=1 SV=2         |             |
| Tex14    | Q7M6U3 | Inactive serine/threonine-protein kinase TEX14 OS=Mus musculus OX=10090 GN=Tex14 PE=1 SV=2     |             |
| Top3a    | O70157 | DNA topoisomerase 3-alpha OS=Mus musculus OX=10090 GN=Top3a PE=2 SV=1                          |             |
| Tnk2     | O54967 | Activated CDC42 kinase 1 OS=Mus musculus OX=10090 GN=Tnk2 PE=1 SV=2                            |             |
| Parp14   | Q2EMV9 | Protein mono-ADP-ribosyltransferase PARP14 OS=Mus musculus OX=10090 GN=Parp14 PE=1 SV=3        | 0.11        |
| Lrp8     | Q924X6 | Low-density lipoprotein receptor-related protein 8 OS=Mus musculus OX=10090 GN=Lrp8 PE=1 SV=   |             |
| Snx19    | Q6P4T1 | Sorting nexin-19 OS=Mus musculus OX=10090 GN=Snx19 PE=1 SV=1                                   | 1.12        |
| Isca2    | Q9DCB8 | Iron-sulfur cluster assembly 2 homolog mitochondrial OS=Mus musculus OX=10090 GN=Isca2 PE=1    |             |
| Lto1     | Q8CH62 | Protein LTO1 homolog OS=Mus musculus OX=10090 GN=Lto1 PE=1 SV=1                                |             |
| Leng1    | Q9DB98 | Leukocyte receptor cluster member 1 homolog OS=Mus musculus OX=10090 GN=Leng1 PE=2 SV=1        |             |
| Odf2     | A3KGV1 | Outer dense fiber protein 2 OS=Mus musculus OX=10090 GN=Odf2 PE=1 SV=1                         |             |
| Sspo     | Q8CG65 | SCO-spondin OS=Mus musculus OX=10090 GN=Sspo PE=2 SV=2                                         | 0.053333333 |
| Atp5f1e  | P56382 | ATP synthase subunit epsilon mitochondrial OS=Mus musculus OX=10090 GN=Atp5f1e PE=1 SV=2       |             |
| Smyd3    | Q9CWR2 | Histone-lysine N-methyltransferase SMYD3 OS=Mus musculus OX=10090 GN=Smyd3 PE=2 SV=1           |             |
| Oprd1    | P32300 | Delta-type opioid receptor OS=Mus musculus OX=10090 GN=Oprd1 PE=1 SV=1                         |             |
| Slc38a1  | Q8K2P7 | Sodium-coupled neutral amino acid transporter 1 OS=Mus musculus OX=10090 GN=Slc38a1 PE=1 SV=   |             |
| Ptx3     | P48759 | Pentraxin-related protein PTX3 OS=Mus musculus OX=10090 GN=Ptx3 PE=1 SV=2                      |             |
| Mtus1    | Q5HZI1 | Microtubule-associated tumor suppressor 1 homolog OS=Mus musculus OX=10090 GN=Mtus1 PE=1       |             |
| Glce     | Q9EPS3 | D-glucuronyl C5-epimerase OS=Mus musculus OX=10090 GN=Glce PE=1 SV=2                           | 0.84        |
| Ttc5     | Q99LG4 | Tetratricopeptide repeat protein 5 OS=Mus musculus OX=10090 GN=Ttc5 PE=1 SV=2                  |             |
| Arhgap23 | Q69ZH9 | Rho GTPase-activating protein 23 OS=Mus musculus OX=10090 GN=Arhgap23 PE=1 SV=2                |             |
| Lrrc23   | O35125 | Leucine-rich repeat-containing protein 23 OS=Mus musculus OX=10090 GN=Lrrc23 PE=1 SV=1         | 0.75        |
| Casp2    | P29594 | Caspase-2 OS=Mus musculus OX=10090 GN=Casp2 PE=1 SV=5                                          |             |
| Meioc    | A2AG06 | Meiosis-specific coiled-coil domain-containing protein MEIOC OS=Mus musculus OX=10090 GN=Meioc |             |
| Dnmt3a   | O88508 | DNA (cytosine-5)-methyltransferase 3A OS=Mus musculus OX=10090 GN=Dnmt3a PE=1 SV=2             |             |
| Sycp1    | Q62209 | Synaptonemal complex protein 1 OS=Mus musculus OX=10090 GN=Sycp1 PE=1 SV=2                     |             |
| Il27ra   | O70394 | Interleukin-27 receptor subunit alpha OS=Mus musculus OX=10090 GN=Il27ra PE=2 SV=2             | 0.02        |
| Rspry1   | Q8BVR6 | RING finger and SPRY domain-containing protein 1 OS=Mus musculus OX=10090 GN=Rspry1 PE=1 SV=   | 0.86        |
| Wdr93    | Q402B2 | WD repeat-containing protein 93 OS=Mus musculus OX=10090 GN=Wdr93 PE=2 SV=1                    |             |

|          |        |                                                                                                                  |       |
|----------|--------|------------------------------------------------------------------------------------------------------------------|-------|
| Ras10a   | Q8K5A4 | Ras-like protein family member 10A OS=Mus musculus OX=10090 GN=Ras10a PE=2 SV=1                                  |       |
| Hunk     | O88866 | Hormonally up-regulated neu tumor-associated kinase OS=Mus musculus OX=10090 GN=Hunk PE=2 SV=0                   |       |
| Tmc5     | Q32NZ6 | Transmembrane channel-like protein 5 OS=Mus musculus OX=10090 GN=Tmc5 PE=2 SV=1                                  | 0     |
| Eif2ak1  | Q9Z2R9 | Eukaryotic translation initiation factor 2-alpha kinase 1 OS=Mus musculus OX=10090 GN=Eif2ak1 PE=1 SV=1          | 0.94  |
| Cdc45    | Q9Z1X9 | Cell division control protein 45 homolog OS=Mus musculus OX=10090 GN=Cdc45 PE=1 SV=2                             |       |
| Abhd6    | Q8R2Y0 | Monoacylglycerol lipase ABHD6 OS=Mus musculus OX=10090 GN=Abhd6 PE=1 SV=1                                        |       |
| Lrrc45   | Q8CIM1 | Leucine-rich repeat-containing protein 45 OS=Mus musculus OX=10090 GN=Lrrc45 PE=2 SV=2                           | 0.98  |
| Ghdc     | Q99J23 | GH3 domain-containing protein OS=Mus musculus OX=10090 GN=Ghdc PE=2 SV=2                                         |       |
| Slc22a8  | O88909 | Solute carrier family 22 member 8 OS=Mus musculus OX=10090 GN=Slc22a8 PE=1 SV=2                                  |       |
| Selenon  | D3Z2R5 | Selenoprotein N OS=Mus musculus OX=10090 GN=Selenon PE=3 SV=2                                                    | 0.75  |
| Sort1    | Q6PHU5 | Sortilin OS=Mus musculus OX=10090 GN=Sort1 PE=1 SV=1                                                             | 0.675 |
| Med12l   | Q8BQM9 | Mediator of RNA polymerase II transcription subunit 12-like protein OS=Mus musculus OX=10090 GN=Med12l PE=1 SV=1 |       |
| Resf1    | Q5DTW7 | Retroelement silencing factor 1 OS=Mus musculus OX=10090 GN=Resf1 PE=1 SV=2                                      | 1.165 |
| Rtn4rl1  | Q8K0S5 | Reticulon-4 receptor-like 1 OS=Mus musculus OX=10090 GN=Rtn4rl1 PE=1 SV=1                                        | 0.975 |
| Reep3    | Q99KK1 | Receptor expression-enhancing protein 3 OS=Mus musculus OX=10090 GN=Reep3 PE=1 SV=1                              |       |
| Zfp292   | Q9Z2U2 | Zinc finger protein 292 OS=Mus musculus OX=10090 GN=Zfp292 PE=1 SV=2                                             |       |
| Tnip1    | Q9WUU8 | TNFAIP3-interacting protein 1 OS=Mus musculus OX=10090 GN=Tnip1 PE=1 SV=1                                        |       |
| Irs4     | Q9Z0Y7 | Insulin receptor substrate 4 OS=Mus musculus OX=10090 GN=Irs4 PE=1 SV=2                                          | 0.17  |
| Ift20    | Q61025 | Intraflagellar transport protein 20 homolog OS=Mus musculus OX=10090 GN=Ift20 PE=1 SV=1                          |       |
| Lrrc20   | Q8CI70 | Leucine-rich repeat-containing protein 20 OS=Mus musculus OX=10090 GN=Lrrc20 PE=1 SV=1                           |       |
| Wnt7b    | P28047 | Protein Wnt-7b OS=Mus musculus OX=10090 GN=Wnt7b PE=1 SV=1                                                       |       |
| Selenbp2 | Q63836 | Selenium-binding protein 2 OS=Mus musculus OX=10090 GN=Selenbp2 PE=1 SV=2                                        |       |
| Ccdc110  | Q3V125 | Coiled-coil domain-containing protein 110 OS=Mus musculus OX=10090 GN=Ccdc110 PE=1 SV=1                          |       |
| Pan3     | Q640Q5 | PAN2-PAN3 deadenylation complex subunit Pan3 OS=Mus musculus OX=10090 GN=Pan3 PE=1 SV=1                          |       |
| Mbd2     | Q9Z2E1 | Methyl-CpG-binding domain protein 2 OS=Mus musculus OX=10090 GN=Mbd2 PE=2 SV=2                                   | 3.895 |
| Ptprz1   | B9EKR1 | Receptor-type tyrosine-protein phosphatase zeta OS=Mus musculus OX=10090 GN=Ptprz1 PE=1 SV=1                     |       |
| Mov10l1  | Q99MV5 | RNA helicase Mov10l1 OS=Mus musculus OX=10090 GN=Mov10l1 PE=1 SV=1                                               |       |
| Scarf1   | Q5ND28 | Scavenger receptor class F member 1 OS=Mus musculus OX=10090 GN=Scarf1 PE=1 SV=1                                 | 52.81 |
| Nxph1    | Q61200 | Neurexophilin-1 OS=Mus musculus OX=10090 GN=Nxph1 PE=2 SV=2                                                      |       |
| Cep162   | Q6ZQ06 | Centrosomal protein of 162 kDa OS=Mus musculus OX=10090 GN=Cep162 PE=1 SV=2                                      | 0.02  |
| Znf462   | B1AWL2 | Zinc finger protein 462 OS=Mus musculus OX=10090 GN=Znf462 PE=1 SV=1                                             |       |
| Uvrug    | Q8K245 | UV radiation resistance-associated protein OS=Mus musculus OX=10090 GN=Uvrug PE=1 SV=2                           | 0.685 |
| Atp5b    | Q9D1Z3 | ATP synthase subunit C lysine N-methyltransferase OS=Mus musculus OX=10090 GN=Atp5b PE=1 SV=1                    |       |
| Ndr4     | Q8BTG7 | Protein NDR4 OS=Mus musculus OX=10090 GN=Ndr4 PE=1 SV=1                                                          |       |



|         |            |                                                                                             |             |
|---------|------------|---------------------------------------------------------------------------------------------|-------------|
| Adcy7   | P51829     | Adenylate cyclase type 7 OS=Mus musculus OX=10090 GN=Adcy7 PE=1 SV=2                        |             |
| Mrm1    | Q99J25     | rRNA methyltransferase 1 mitochondrial OS=Mus musculus OX=10090 GN=Mrm1 PE=2 SV=2           |             |
| Meikin  | Q5F2C3     | Meiosis-specific kinetochore protein OS=Mus musculus OX=10090 GN=Meikin PE=1 SV=1           | 0.85        |
| Auts2   | A0A087WPF7 | Autism susceptibility gene 2 protein homolog OS=Mus musculus OX=10090 GN=Auts2 PE=1 SV=2    |             |
| Fam3a   | Q9D8T0     | Protein FAM3A OS=Mus musculus OX=10090 GN=Fam3a PE=2 SV=1                                   |             |
| Adgrg4  | B7ZCC9     | Adhesion G-protein coupled receptor G4 OS=Mus musculus OX=10090 GN=Adgrg4 PE=3 SV=1         | 0.9         |
| Adam25  | Q9R159     | Disintegrin and metalloproteinase domain-containing protein 25 OS=Mus musculus OX=10090 GN= | 0           |
| Syn3    | Q8JZP2     | Synapsin-3 OS=Mus musculus OX=10090 GN=Syn3 PE=1 SV=2                                       | 0.686666667 |
| Capn15  | Q9JLG8     | Calpain-15 OS=Mus musculus OX=10090 GN=Capn15 PE=1 SV=1                                     |             |
| Slc26a2 | Q62273     | Sulfate transporter OS=Mus musculus OX=10090 GN=Slc26a2 PE=1 SV=1                           |             |
| Nodal   | P43021     | Nodal OS=Mus musculus OX=10090 GN=Nodal PE=2 SV=2                                           |             |
| Ntrk1   | Q3UFB7     | High affinity nerve growth factor receptor OS=Mus musculus OX=10090 GN=Ntrk1 PE=1 SV=2      |             |
| Nynrin  | Q5DTZ0     | Protein NYNRIN OS=Mus musculus OX=10090 GN=Nynrin PE=2 SV=2                                 |             |
| Ugcg    | O88693     | Ceramide glucosyltransferase OS=Mus musculus OX=10090 GN=Ugcg PE=1 SV=1                     |             |
| Ky      | Q8C8H8     | Kyphoscoliosis peptidase OS=Mus musculus OX=10090 GN=Ky PE=1 SV=1                           |             |
| Trim26  | Q99PN3     | Tripartite motif-containing protein 26 OS=Mus musculus OX=10090 GN=Trim26 PE=2 SV=3         |             |
| Gimap4  | Q99JY3     | GTPase IMAP family member 4 OS=Mus musculus OX=10090 GN=Gimap4 PE=1 SV=2                    |             |
| Dzip1   | Q8BMD2     | Zinc finger protein DZIP1 OS=Mus musculus OX=10090 GN=Dzip1 PE=1 SV=3                       |             |
| Ankrd49 | Q8VE42     | Ankyrin repeat domain-containing protein 49 OS=Mus musculus OX=10090 GN=Ankrd49 PE=1 SV=1   |             |
| Kndc1   | Q0KK55     | Kinase non-catalytic C-lobe domain-containing protein 1 OS=Mus musculus OX=10090 GN=Kndc1   | P 0.15      |
| Abca8a  | Q8K442     | ATP-binding cassette sub-family A member 8-A OS=Mus musculus OX=10090 GN=Abca8a PE=1 SV=2   |             |
| Abca9   | Q8K449     | ATP-binding cassette sub-family A member 9 OS=Mus musculus OX=10090 GN=Abca9 PE=1 SV=2      |             |
| Ranbp3l | Q6PDH4     | Ran-binding protein 3-like OS=Mus musculus OX=10090 GN=Ranbp3l PE=1 SV=1                    | 0.91        |
| Setd5   | Q5XJV7     | Histone-lysine N-methyltransferase SETD5 OS=Mus musculus OX=10090 GN=Setd5 PE=1 SV=2        |             |
| Limch1  | Q3UH68     | LIM and calponin homology domains-containing protein 1 OS=Mus musculus OX=10090 GN=Limch    | 0.405       |
| Dlgap1  | Q9D415     | Disks large-associated protein 1 OS=Mus musculus OX=10090 GN=Dlgap1 PE=1 SV=3               | 1.936666667 |
| Cnnm3   | Q32NY4     | Metal transporter CNNM3 OS=Mus musculus OX=10090 GN=Cnnm3 PE=1 SV=2                         | 0.99        |
| Aff3    | P51827     | AF4/FMR2 family member 3 OS=Mus musculus OX=10090 GN=Aff3 PE=1 SV=2                         |             |
| Ankar   | A2RT91     | Ankyrin and armadillo repeat-containing protein OS=Mus musculus OX=10090 GN=Ankar PE=2 SV=1 |             |
| Rnf10   | Q3UIW5     | RING finger protein 10 OS=Mus musculus OX=10090 GN=Rnf10 PE=2 SV=2                          |             |
| Slc9c1  | Q6UJY2     | Sodium/hydrogen exchanger 10 OS=Mus musculus OX=10090 GN=Slc9c1 PE=1 SV=3                   |             |
| Obi1    | Q8K2Y0     | ORC ubiquitin ligase 1 OS=Mus musculus OX=10090 GN=Obi1 PE=1 SV=2                           |             |
| Igsf8   | Q8R366     | Immunoglobulin superfamily member 8 OS=Mus musculus OX=10090 GN=Igsf8 PE=1 SV=2             |             |
| Hdac9   | Q99N13     | Histone deacetylase 9 OS=Mus musculus OX=10090 GN=Hdac9 PE=1 SV=2                           |             |

|          |        |                                                                                               |     |
|----------|--------|-----------------------------------------------------------------------------------------------|-----|
| Fbxo32   | Q9CPU7 | F-box only protein 32 OS=Mus musculus OX=10090 GN=Fbxo32 PE=2 SV=1                            |     |
| Prdm8    | Q8BZ97 | PR domain zinc finger protein 8 OS=Mus musculus OX=10090 GN=Prdm8 PE=1 SV=1                   |     |
| Stxbp2   | Q64324 | Syntaxin-binding protein 2 OS=Mus musculus OX=10090 GN=Stxbp2 PE=1 SV=1                       |     |
| Map4k1   | P70218 | Mitogen-activated protein kinase kinase kinase 1 OS=Mus musculus OX=10090 GN=Map4k1 P         |     |
| Ncoa3    | O09000 | Nuclear receptor coactivator 3 OS=Mus musculus OX=10090 GN=Ncoa3 PE=1 SV=2                    |     |
| Patj     | Q63ZW7 | InaD-like protein OS=Mus musculus OX=10090 GN=Patj PE=1 SV=2                                  |     |
| Traf3ip1 | Q149C2 | TRAF3-interacting protein 1 OS=Mus musculus OX=10090 GN=Traf3ip1 PE=1 SV=2                    |     |
| Nod2     | Q8K3Z0 | Nucleotide-binding oligomerization domain-containing protein 2 OS=Mus musculus OX=10090 GN    |     |
| Kmo      | Q91WN4 | Kynurenine 3-monooxygenase OS=Mus musculus OX=10090 GN=Kmo PE=1 SV=1                          | 0   |
| Ln timer | Q91XL2 | Ligand of Numb protein X 2 OS=Mus musculus OX=10090 GN=Ln timer PE=1 SV=2                     |     |
| Lama3    | Q61789 | Laminin subunit alpha-3 OS=Mus musculus OX=10090 GN=Lama3 PE=1 SV=4                           |     |
| Troap    | B7ZNG4 | Tastin OS=Mus musculus OX=10090 GN=Troap PE=2 SV=1                                            | 0.9 |
| Sema3f   | O88632 | Semaphorin-3F OS=Mus musculus OX=10090 GN=Sema3f PE=2 SV=2                                    |     |
| Cep350   | E9Q309 | Centrosome-associated protein 350 OS=Mus musculus OX=10090 GN=Cep350 PE=1 SV=1                |     |
| Map3k1   | P53349 | Mitogen-activated protein kinase kinase kinase 1 OS=Mus musculus OX=10090 GN=Map3k1 PE=1 SV   |     |
| Cenpa    | O35216 | Histone H3-like centromeric protein A OS=Mus musculus OX=10090 GN=Cenpa PE=2 SV=1             |     |
| Atp9a    | O70228 | Probable phospholipid-transporting ATPase IIA OS=Mus musculus OX=10090 GN=Atp9a PE=1 SV=3     |     |
| Cplane1  | Q8CE72 | Ciliogenesis and planar polarity effector 1 OS=Mus musculus OX=10090 GN=Cplane1 PE=1 SV=4     |     |
| Ttc21a   | Q8C0S4 | Tetratricopeptide repeat protein 21A OS=Mus musculus OX=10090 GN=Ttc21a PE=1 SV=2             |     |
| Id3      | P41133 | DNA-binding protein inhibitor ID-3 OS=Mus musculus OX=10090 GN=Id3 PE=1 SV=1                  |     |
| Mab21l4  | Q8CEZ4 | Protein mab-21-like 4 OS=Mus musculus OX=10090 GN=Mab21l4 PE=1 SV=2                           |     |
| Slc37a2  | Q9WU81 | Glucose-6-phosphate exchanger SLC37A2 OS=Mus musculus OX=10090 GN=Slc37a2 PE=1 SV=1           |     |
| Slc37a1  | Q8R070 | Glucose-6-phosphate exchanger SLC37A1 OS=Mus musculus OX=10090 GN=Slc37a1 PE=2 SV=1           |     |
| Plekhg6  | Q8R0J1 | Pleckstrin homology domain-containing family G member 6 OS=Mus musculus OX=10090 GN=Plekhg6   |     |
| Phlpp2   | Q8BXA7 | PH domain leucine-rich repeat-containing protein phosphatase 2 OS=Mus musculus OX=10090 GN=   |     |
| Aox1     | O54754 | Aldehyde oxidase 1 OS=Mus musculus OX=10090 GN=Aox1 PE=1 SV=2                                 |     |
| Ap1s3    | Q7TN05 | AP-1 complex subunit sigma-3 OS=Mus musculus OX=10090 GN=Ap1s3 PE=1 SV=1                      |     |
| Dhdh     | Q9DBB8 | Trans-1 2-dihydrobenzene-1 2-diol dehydrogenase OS=Mus musculus OX=10090 GN=Dhdh PE=1 SV=     |     |
| Ln timer | O70263 | E3 ubiquitin-protein ligase LNX OS=Mus musculus OX=10090 GN=Ln timer PE=1 SV=1                |     |
| Svep1    | A2AVA0 | Sushi von Willebrand factor type A EGF and pentraxin domain-containing protein 1 OS=Mus muscu |     |
| Pecr     | Q99MZ7 | Peroxisomal trans-2-enoyl-CoA reductase OS=Mus musculus OX=10090 GN=Pecr PE=1 SV=1            |     |
| Adcy4    | Q91WF3 | Adenylate cyclase type 4 OS=Mus musculus OX=10090 GN=Adcy4 PE=1 SV=1                          |     |
| Chil3    | O35744 | Chitinase-like protein 3 OS=Mus musculus OX=10090 GN=Chil3 PE=1 SV=2                          |     |
| Egr1     | P08046 | Early growth response protein 1 OS=Mus musculus OX=10090 GN=Egr1 PE=1 SV=2                    |     |

|         |        |                                                                                                  |             |
|---------|--------|--------------------------------------------------------------------------------------------------|-------------|
| Aff4    | Q9ESC8 | AF4/FMR2 family member 4 OS=Mus musculus OX=10090 GN=Aff4 PE=1 SV=1                              |             |
| Tsga10  | Q6NY15 | Testis-specific gene 10 protein OS=Mus musculus OX=10090 GN=Tsga10 PE=1 SV=1                     |             |
| Cldn1   | O88551 | Claudin-1 OS=Mus musculus OX=10090 GN=Cldn1 PE=1 SV=1                                            |             |
| Reln    | Q60841 | Reelin OS=Mus musculus OX=10090 GN=Reln PE=1 SV=3                                                |             |
| Cntrl   | A2AL36 | Centriolin OS=Mus musculus OX=10090 GN=Cntrl PE=1 SV=2                                           |             |
| Obscn   | A2AAJ9 | Obscurin OS=Mus musculus OX=10090 GN=Obscn PE=1 SV=3                                             |             |
| Stard5  | Q9EPQ7 | StAR-related lipid transfer protein 5 OS=Mus musculus OX=10090 GN=Stard5 PE=1 SV=2               |             |
| Rgs9    | O54828 | Regulator of G-protein signaling 9 OS=Mus musculus OX=10090 GN=Rgs9 PE=1 SV=3                    |             |
| Ccdc89  | Q9DA73 | Coiled-coil domain-containing protein 89 OS=Mus musculus OX=10090 GN=Ccdc89 PE=1 SV=2            |             |
| Ccnl2   | Q9JJA7 | Cyclin-L2 OS=Mus musculus OX=10090 GN=Ccnl2 PE=1 SV=1                                            |             |
| Lancl3  | Q8CD19 | LanC-like protein 3 OS=Mus musculus OX=10090 GN=Lancl3 PE=2 SV=2                                 |             |
| Fbxo41  | Q6NS60 | F-box only protein 41 OS=Mus musculus OX=10090 GN=Fbxo41 PE=1 SV=3                               |             |
| Brip1   | Q5SXJ3 | Fanconi anemia group J protein homolog OS=Mus musculus OX=10090 GN=Brip1 PE=2 SV=1               |             |
| Fsip2   | A2ARZ3 | Fibrous sheath-interacting protein 2 OS=Mus musculus OX=10090 GN=Fsip2 PE=1 SV=3                 |             |
| Unc45b  | Q8CGY6 | Protein unc-45 homolog B OS=Mus musculus OX=10090 GN=Unc45b PE=1 SV=1                            | 0.856666667 |
| Cnksr3  | Q8BMA3 | Connector enhancer of kinase suppressor of ras 3 OS=Mus musculus OX=10090 GN=Cnksr3 PE=1 SV=     |             |
| lqcd    | Q9D3V1 | Dynein regulatory complex protein 10 OS=Mus musculus OX=10090 GN=lqcd PE=2 SV=1                  |             |
| Kif26a  | Q52KG5 | Kinesin-like protein KIF26A OS=Mus musculus OX=10090 GN=Kif26a PE=1 SV=2                         |             |
| Ets1    | P27577 | Protein C-ets-1 OS=Mus musculus OX=10090 GN=Ets1 PE=1 SV=2                                       |             |
| Zan     | O88799 | Zonadhesin OS=Mus musculus OX=10090 GN=Zan PE=1 SV=1                                             |             |
| Hif1a   | Q61221 | Hypoxia-inducible factor 1-alpha OS=Mus musculus OX=10090 GN=Hif1a PE=1 SV=3                     | 0.01        |
| Fancm   | Q8BGE5 | Fanconi anemia group M protein homolog OS=Mus musculus OX=10090 GN=Fancm PE=1 SV=3               | 1.125       |
| Acsf3   | Q3URE1 | Malonate--CoA ligase ACSF3 mitochondrial OS=Mus musculus OX=10090 GN=Acsf3 PE=1 SV=2             |             |
| Pik3cd  | O35904 | Phosphatidylinositol 4 5-bisphosphate 3-kinase catalytic subunit delta isoform OS=Mus musculus C |             |
| Cndp1   | Q8BUG2 | Beta-Ala-His dipeptidase OS=Mus musculus OX=10090 GN=Cndp1 PE=2 SV=1                             | 0.315       |
| Cflar   | O35732 | CASP8 and FADD-like apoptosis regulator OS=Mus musculus OX=10090 GN=Cflar PE=1 SV=3              |             |
| Sardh   | Q99LB7 | Sarcosine dehydrogenase mitochondrial OS=Mus musculus OX=10090 GN=Sardh PE=1 SV=1                |             |
| Ap4m1   | Q9JKC7 | AP-4 complex subunit mu-1 OS=Mus musculus OX=10090 GN=Ap4m1 PE=1 SV=1                            |             |
| Fam83g  | Q5SWY7 | Protein FAM83G OS=Mus musculus OX=10090 GN=Fam83g PE=1 SV=1                                      |             |
| Ptk2b   | Q9QVP9 | Protein-tyrosine kinase 2-beta OS=Mus musculus OX=10090 GN=Ptk2b PE=1 SV=2                       |             |
| Adcy3   | Q8VHH7 | Adenylate cyclase type 3 OS=Mus musculus OX=10090 GN=Adcy3 PE=1 SV=2                             |             |
| Acrbp   | Q3V140 | Acrosin-binding protein OS=Mus musculus OX=10090 GN=Acrbp PE=1 SV=1                              |             |
| Abca1   | P41233 | Phospholipid-transporting ATPase ABCA1 OS=Mus musculus OX=10090 GN=Abca1 PE=1 SV=4               |             |
| Fam216a | Q9DB54 | Protein FAM216A OS=Mus musculus OX=10090 GN=Fam216a PE=2 SV=1                                    |             |

|         |        |                                                                                                      |             |
|---------|--------|------------------------------------------------------------------------------------------------------|-------------|
| Hmcn1   | D3YXG0 | Hemicentin-1 OS=Mus musculus OX=10090 GN=Hmcn1 PE=1 SV=1                                             |             |
| Znf496  | Q5SX15 | Zinc finger protein 496 OS=Mus musculus OX=10090 GN=Znf496 PE=1 SV=1                                 |             |
|         | Q8BGC1 | UPF0489 protein C5orf22 homolog OS=Mus musculus OX=10090 PE=1 SV=1                                   |             |
| Tec     | P24604 | Tyrosine-protein kinase Tec OS=Mus musculus OX=10090 GN=Tec PE=1 SV=2                                |             |
| Zp2     | P20239 | Zona pellucida sperm-binding protein 2 OS=Mus musculus OX=10090 GN=Zp2 PE=1 SV=1                     |             |
| Muc13   | Q3TNW5 | Mucin-like protein 3 OS=Mus musculus OX=10090 GN=Muc13 PE=2 SV=1                                     |             |
| Gsdmdc1 | Q9D8T2 | Gasdermin-D OS=Mus musculus OX=10090 GN=Gsdmdc1 PE=1 SV=1                                            |             |
| Trim67  | Q505D9 | Tripartite motif-containing protein 67 OS=Mus musculus OX=10090 GN=Trim67 PE=2 SV=1                  |             |
| Cmya5   | Q70KF4 | Cardiomyopathy-associated protein 5 OS=Mus musculus OX=10090 GN=Cmya5 PE=1 SV=2                      |             |
| Frem2   | Q6NVD0 | FRAS1-related extracellular matrix protein 2 OS=Mus musculus OX=10090 GN=Frem2 PE=1 SV=2             |             |
| Dennd2c | Q6P9P8 | DENN domain-containing protein 2C OS=Mus musculus OX=10090 GN=Dennd2c PE=1 SV=1                      |             |
| Znf507  | Q6ZPY5 | Zinc finger protein 507 OS=Mus musculus OX=10090 GN=Znf507 PE=2 SV=2                                 |             |
| Ebf2    | O08792 | Transcription factor COE2 OS=Mus musculus OX=10090 GN=Ebf2 PE=1 SV=4                                 |             |
| Sipa1l1 | Q8C0T5 | Signal-induced proliferation-associated 1-like protein 1 OS=Mus musculus OX=10090 GN=Sipa1l1 P 9.735 |             |
| Rxra    | P28700 | Retinoic acid receptor RXR-alpha OS=Mus musculus OX=10090 GN=Rxra PE=1 SV=1                          | 1.51        |
| Bmp2k   | Q91Z96 | BMP-2-inducible protein kinase OS=Mus musculus OX=10090 GN=Bmp2k PE=1 SV=1                           | 0.73        |
| Smap2   | Q7TN29 | Stromal membrane-associated protein 2 OS=Mus musculus OX=10090 GN=Smap2 PE=1 SV=1                    | 4.736666667 |
| Rab27b  | Q99P58 | Ras-related protein Rab-27B OS=Mus musculus OX=10090 GN=Rab27b PE=1 SV=3                             | 0.92        |
| Arfrp1  | Q8BXL7 | ADP-ribosylation factor-related protein 1 OS=Mus musculus OX=10090 GN=Arfrp1 PE=1 SV=2               | 0.86        |
| Ifitm2  | Q99J93 | Interferon-induced transmembrane protein 2 OS=Mus musculus OX=10090 GN=Ifitm2 PE=1 SV=1              | 0.993333333 |
| Prkd1   | Q62101 | Serine/threonine-protein kinase D1 OS=Mus musculus OX=10090 GN=Prkd1 PE=1 SV=2                       | 1.295       |
| Numbl   | O08919 | Numb-like protein OS=Mus musculus OX=10090 GN=Numbl PE=1 SV=3                                        | 0.633333333 |
| Sumo2   | P61957 | Small ubiquitin-related modifier 2 OS=Mus musculus OX=10090 GN=Sumo2 PE=1 SV=1                       | 0.896666667 |
| Mastl   | Q8C0P0 | Serine/threonine-protein kinase greatwall OS=Mus musculus OX=10090 GN=Mastl PE=2 SV=2                |             |
| Meis2   | P97367 | Homeobox protein Meis2 OS=Mus musculus OX=10090 GN=Meis2 PE=1 SV=2                                   |             |
| Fam76b  | Q80XP8 | Protein FAM76B OS=Mus musculus OX=10090 GN=Fam76b PE=1 SV=1                                          |             |
| Sumo3   | Q9Z172 | Small ubiquitin-related modifier 3 OS=Mus musculus OX=10090 GN=Sumo3 PE=1 SV=1                       | 0.86        |
| Rxrb    | P28704 | Retinoic acid receptor RXR-beta OS=Mus musculus OX=10090 GN=Rxrb PE=1 SV=2                           |             |
| Kdelr1  | Q99JH8 | ER lumen protein-retaining receptor 1 OS=Mus musculus OX=10090 GN=Kdelr1 PE=1 SV=1                   | 1.21        |
| Prrx2   | Q06348 | Paired mesoderm homeobox protein 2 OS=Mus musculus OX=10090 GN=Prrx2 PE=2 SV=2                       |             |
| Tcf4    | Q60722 | Transcription factor 4 OS=Mus musculus OX=10090 GN=Tcf4 PE=1 SV=1                                    | 1.46        |
| Atf1    | P81269 | Cyclic AMP-dependent transcription factor ATF-1 OS=Mus musculus OX=10090 GN=Atf1 PE=1 SV=1           | 0.673333333 |
| Helz2   | E9QAM5 | Helicase with zinc finger domain 2 OS=Mus musculus OX=10090 GN=Helz2 PE=1 SV=1                       |             |
| Hoxc6   | P10629 | Homeobox protein Hox-C6 OS=Mus musculus OX=10090 GN=Hoxc6 PE=2 SV=2                                  |             |

|          |        |                                                                                              |             |
|----------|--------|----------------------------------------------------------------------------------------------|-------------|
| Ppfia2   | Q8BSS9 | Liprin-alpha-2 OS=Mus musculus OX=10090 GN=Ppfia2 PE=1 SV=2                                  |             |
| Rab30    | Q923S9 | Ras-related protein Rab-30 OS=Mus musculus OX=10090 GN=Rab30 PE=1 SV=1                       | 0.9         |
| Bod1     | Q5SQY2 | Biorientation of chromosomes in cell division protein 1 OS=Mus musculus OX=10090 GN=Bod1 PE= |             |
| Tnrc6a   | Q3UHK8 | Trinucleotide repeat-containing gene 6A protein OS=Mus musculus OX=10090 GN=Tnrc6a PE=1 SV=  |             |
| Ube2b    | P63147 | Ubiquitin-conjugating enzyme E2 B OS=Mus musculus OX=10090 GN=Ube2b PE=1 SV=1                | 0.716666667 |
| Ssbp3    | Q9D032 | Single-stranded DNA-binding protein 3 OS=Mus musculus OX=10090 GN=Ssbp3 PE=1 SV=2            |             |
| Samd4b   | Q80XS6 | Protein Smaug homolog 2 OS=Mus musculus OX=10090 GN=Samd4b PE=1 SV=1                         |             |
| Ppfia3   | P60469 | Liprin-alpha-3 OS=Mus musculus OX=10090 GN=Ppfia3 PE=1 SV=2                                  |             |
| Map3k2   | Q61083 | Mitogen-activated protein kinase kinase kinase 2 OS=Mus musculus OX=10090 GN=Map3k2 PE=1 SV  |             |
| Ltf      | P08071 | Lactotransferrin OS=Mus musculus OX=10090 GN=Ltf PE=1 SV=4                                   | 0.26        |
| Ube2d1   | P61080 | Ubiquitin-conjugating enzyme E2 D1 OS=Mus musculus OX=10090 GN=Ube2d1 PE=1 SV=1              | 0.916666667 |
| Helz     | Q6DFV5 | Probable helicase with zinc finger domain OS=Mus musculus OX=10090 GN=Helz PE=1 SV=2         |             |
| Rel      | P15307 | Proto-oncogene c-Rel OS=Mus musculus OX=10090 GN=Rel PE=1 SV=2                               |             |
| Kifc3    | O35231 | Kinesin-like protein KIFC3 OS=Mus musculus OX=10090 GN=Kifc3 PE=1 SV=4                       | 0.42        |
| Rassf2   | Q8BMS9 | Ras association domain-containing protein 2 OS=Mus musculus OX=10090 GN=Rassf2 PE=1 SV=1     | 0.945       |
| Daxx     | O35613 | Death domain-associated protein 6 OS=Mus musculus OX=10090 GN=Daxx PE=1 SV=1                 |             |
| Map1lc3a | Q91VR7 | Microtubule-associated proteins 1A/1B light chain 3A OS=Mus musculus OX=10090 GN=Map1lc3a f  | 0.975       |
| Pzp      | Q61838 | Pregnancy zone protein OS=Mus musculus OX=10090 GN=Pzp PE=1 SV=3                             | 0.11        |
| Hbb-y    | P02104 | Hemoglobin subunit epsilon-Y2 OS=Mus musculus OX=10090 GN=Hbb-y PE=1 SV=2                    | 0           |
| Tbc1d4   | Q8BYJ6 | TBC1 domain family member 4 OS=Mus musculus OX=10090 GN=Tbc1d4 PE=1 SV=2                     |             |
| Pard6b   | Q9JK83 | Partitioning defective 6 homolog beta OS=Mus musculus OX=10090 GN=Pard6b PE=1 SV=2           | 0.983333333 |
| Runx3    | Q64131 | Runt-related transcription factor 3 OS=Mus musculus OX=10090 GN=Runx3 PE=1 SV=3              |             |
| Rrad     | O88667 | GTP-binding protein RAD OS=Mus musculus OX=10090 GN=Rrad PE=1 SV=1                           | 1.22        |
| Lrrc1    | Q80VQ1 | Leucine-rich repeat-containing protein 1 OS=Mus musculus OX=10090 GN=Lrrc1 PE=1 SV=2         |             |
| Figl1    | Q8BPY9 | Fidgetin-like protein 1 OS=Mus musculus OX=10090 GN=Figl1 PE=1 SV=1                          |             |
| Gabarap  | Q9DCD6 | Gamma-aminobutyric acid receptor-associated protein OS=Mus musculus OX=10090 GN=Gabarap f    | 0.83        |
| Raet1e   | Q9CZQ6 | Retinoic acid early-inducible protein 1-epsilon OS=Mus musculus OX=10090 GN=Raet1e PE=1 SV=1 |             |
| Rhot2    | Q8JZN7 | Mitochondrial Rho GTPase 2 OS=Mus musculus OX=10090 GN=Rhot2 PE=1 SV=1                       |             |
| Fgfr1    | P16092 | Fibroblast growth factor receptor 1 OS=Mus musculus OX=10090 GN=Fgfr1 PE=1 SV=2              | 0.976666667 |
| Fgfr3    | Q61851 | Fibroblast growth factor receptor 3 OS=Mus musculus OX=10090 GN=Fgfr3 PE=1 SV=1              | 0.976666667 |
| Fgfr2    | P21803 | Fibroblast growth factor receptor 2 OS=Mus musculus OX=10090 GN=Fgfr2 PE=1 SV=4              | 0.976666667 |
| Fgfr4    | Q03142 | Fibroblast growth factor receptor 4 OS=Mus musculus OX=10090 GN=Fgfr4 PE=1 SV=3              | 0.976666667 |
| Zscan21  | Q07231 | Zinc finger and SCAN domain-containing protein 21 OS=Mus musculus OX=10090 GN=Zscan21 PE=2   |             |
| Taok3    | Q8BYC6 | Serine/threonine-protein kinase TAO3 OS=Mus musculus OX=10090 GN=Taok3 PE=1 SV=2             |             |



|          |        |                                                                                              |             |
|----------|--------|----------------------------------------------------------------------------------------------|-------------|
| Bnip2    | O54940 | BCL2/adenovirus E1B 19 kDa protein-interacting protein 2 OS=Mus musculus OX=10090 GN=Bnip2   | 1.423333333 |
| Clic6    | Q8BHB9 | Chloride intracellular channel protein 6 OS=Mus musculus OX=10090 GN=Clic6 PE=1 SV=1         |             |
| Clic5    | Q8BXK9 | Chloride intracellular channel protein 5 OS=Mus musculus OX=10090 GN=Clic5 PE=1 SV=1         |             |
| Rps6kb1  | Q8BSK8 | Ribosomal protein S6 kinase beta-1 OS=Mus musculus OX=10090 GN=Rps6kb1 PE=1 SV=2             |             |
| Wdr19    | Q3UGF1 | WD repeat-containing protein 19 OS=Mus musculus OX=10090 GN=Wdr19 PE=1 SV=1                  |             |
| Gmpr     | Q9DCZ1 | GMP reductase 1 OS=Mus musculus OX=10090 GN=Gmpr PE=1 SV=1                                   |             |
| Rps6kb2  | Q9Z1M4 | Ribosomal protein S6 kinase beta-2 OS=Mus musculus OX=10090 GN=Rps6kb2 PE=1 SV=1             |             |
| Magi1    | Q6RHR9 | Membrane-associated guanylate kinase WW and PDZ domain-containing protein 1 OS=Mus muscul    |             |
| Mapk12   | O08911 | Mitogen-activated protein kinase 12 OS=Mus musculus OX=10090 GN=Mapk12 PE=1 SV=1             |             |
| Tnrc6c   | Q3UHC0 | Trinucleotide repeat-containing gene 6C protein OS=Mus musculus OX=10090 GN=Tnrc6c PE=1 SV=  |             |
| Hoxc9    | P09633 | Homeobox protein Hox-C9 OS=Mus musculus OX=10090 GN=Hoxc9 PE=2 SV=2                          |             |
| Pfkfb2   | P70265 | 6-phosphofructo-2-kinase/fructose-2,6-bisphosphatase 2 OS=Mus musculus OX=10090 GN=Pfkfb2    | F           |
| Zc3h6    | Q8BYK8 | Zinc finger CCCH domain-containing protein 6 OS=Mus musculus OX=10090 GN=Zc3h6 PE=2 SV=2     |             |
| Csnk1g1  | Q8BTH8 | Casein kinase I isoform gamma-1 OS=Mus musculus OX=10090 GN=Csnk1g1 PE=1 SV=2                |             |
| Vwa3a    | Q3UVV9 | von Willebrand factor A domain-containing protein 3A OS=Mus musculus OX=10090 GN=Vwa3a       | PE=         |
| Tdrd5    | Q5VCS6 | Tudor domain-containing protein 5 OS=Mus musculus OX=10090 GN=Tdrd5 PE=1 SV=3                |             |
| Mast1    | Q9R1L5 | Microtubule-associated serine/threonine-protein kinase 1 OS=Mus musculus OX=10090 GN=Mast1   |             |
| Hint2    | Q9D0S9 | Histidine triad nucleotide-binding protein 2 mitochondrial OS=Mus musculus OX=10090 GN=Hint2 | 3.945       |
| ErbB2    | P70424 | Receptor tyrosine-protein kinase erbB-2 OS=Mus musculus OX=10090 GN=ErbB2 PE=1 SV=3          |             |
| Bicd1    | Q8BR07 | Protein bicaudal D homolog 1 OS=Mus musculus OX=10090 GN=Bicd1 PE=1 SV=2                     |             |
| Gpatch11 | Q3UFS4 | G patch domain-containing protein 11 OS=Mus musculus OX=10090 GN=Gpatch11 PE=1 SV=2          | 1.7         |
| Wwc1     | Q5SXA9 | Protein KIBRA OS=Mus musculus OX=10090 GN=Wwc1 PE=1 SV=1                                     |             |
| Kcnq2    | Q9Z351 | Potassium voltage-gated channel subfamily KQT member 2 OS=Mus musculus OX=10090 GN=Kcnq2     |             |
| Setd1b   | Q8CFT2 | Histone-lysine N-methyltransferase SETD1B OS=Mus musculus OX=10090 GN=Setd1b PE=1 SV=2       |             |
| Kat6b    | Q8BRB7 | Histone acetyltransferase KAT6B OS=Mus musculus OX=10090 GN=Kat6b PE=1 SV=3                  |             |
| Vps18    | Q8R307 | Vacuolar protein sorting-associated protein 18 homolog OS=Mus musculus OX=10090 GN=Vps18     | P=12.73     |
| Spp1     | P10923 | Osteopontin OS=Mus musculus OX=10090 GN=Spp1 PE=1 SV=1                                       | 0.78        |
| Zfand5   | O88878 | AN1-type zinc finger protein 5 OS=Mus musculus OX=10090 GN=Zfand5 PE=1 SV=1                  | 0.63        |
| Polk     | Q9QUG2 | DNA polymerase kappa OS=Mus musculus OX=10090 GN=Polk PE=1 SV=1                              | 1.07        |
| Kdm6a    | O70546 | Lysine-specific demethylase 6A OS=Mus musculus OX=10090 GN=Kdm6a PE=1 SV=2                   | 1.123333333 |
| Dph6     | Q9CQ28 | Diphthine--ammonia ligase OS=Mus musculus OX=10090 GN=Dph6 PE=1 SV=1                         | 0.515       |
| Syde1    | Q9DBZ9 | Rho GTPase-activating protein SYDE1 OS=Mus musculus OX=10090 GN=Syde1 PE=1 SV=1              | 1           |
| Cks2     | P56390 | Cyclin-dependent kinases regulatory subunit 2 OS=Mus musculus OX=10090 GN=Cks2 PE=1 SV=1     | 0.956666667 |
| Sod3     | O09164 | Extracellular superoxide dismutase [Cu-Zn] OS=Mus musculus OX=10090 GN=Sod3 PE=1 SV=1        | 1.03        |

|          |        |                                                                                                              |             |
|----------|--------|--------------------------------------------------------------------------------------------------------------|-------------|
| Ovca2    | Q9D7E3 | Esterase OVCA2 OS=Mus musculus OX=10090 GN=Ovca2 PE=1 SV=1                                                   | 0.773333333 |
| Atp2c1   | Q80XR2 | Calcium-transporting ATPase type 2C member 1 OS=Mus musculus OX=10090 GN=Atp2c1 PE=1 SV=1                    | 2.255       |
| Fn3krp   | Q8K274 | Ketosamine-3-kinase OS=Mus musculus OX=10090 GN=Fn3krp PE=1 SV=2                                             | 0.535       |
| Cenph    | Q9QYM8 | Centromere protein H OS=Mus musculus OX=10090 GN=Cenph PE=1 SV=1                                             | 1.26        |
| Eef2k    | O08796 | Eukaryotic elongation factor 2 kinase OS=Mus musculus OX=10090 GN=Eef2k PE=1 SV=1                            | 1.81        |
| Mt1      | P02802 | Metallothionein-1 OS=Mus musculus OX=10090 GN=Mt1 PE=1 SV=1                                                  | 1.166666667 |
| Cirbp    | P60824 | Cold-inducible RNA-binding protein OS=Mus musculus OX=10090 GN=Cirbp PE=1 SV=1                               | 0.91        |
| Leng8    | Q8CBY3 | Leukocyte receptor cluster member 8 homolog OS=Mus musculus OX=10090 GN=Leng8 PE=1 SV=1                      | 20.905      |
| Scyl3    | Q9DBQ7 | Protein-associating with the carboxyl-terminal domain of ezrin OS=Mus musculus OX=10090 GN=Scyl3 PE=1 SV=1   | 0.94        |
| Snrpc    | Q62241 | U1 small nuclear ribonucleoprotein C OS=Mus musculus OX=10090 GN=Snrpc PE=1 SV=1                             | 0.863333333 |
|          | Q80X32 | UPF0461 protein C5orf24 homolog OS=Mus musculus OX=10090 GN=Q80X32 PE=2 SV=1                                 | 0.95        |
| Tti1     | Q91V83 | TELO2-interacting protein 1 homolog OS=Mus musculus OX=10090 GN=Tti1 PE=1 SV=2                               | 0.79        |
| Isoc2a   | P85094 | Isochorismatase domain-containing protein 2A OS=Mus musculus OX=10090 GN=Isoc2a PE=1 SV=1                    | 0.94        |
| Kiaa0754 | Q69ZZ9 | Uncharacterized protein KIAA0754 OS=Mus musculus OX=10090 GN=Kiaa0754 PE=2 SV=2                              | 1.06        |
| Noa1     | Q9JJG9 | Nitric oxide-associated protein 1 OS=Mus musculus OX=10090 GN=Noa1 PE=1 SV=1                                 | 0.976666667 |
| Gpsm1    | Q6IR34 | G-protein-signaling modulator 1 OS=Mus musculus OX=10090 GN=Gpsm1 PE=1 SV=3                                  | 0.996666667 |
| Lamb2    | Q61292 | Laminin subunit beta-2 OS=Mus musculus OX=10090 GN=Lamb2 PE=1 SV=2                                           | 1.475       |
| Vps11    | Q91W86 | Vacuolar protein sorting-associated protein 11 homolog OS=Mus musculus OX=10090 GN=Vps11 PE=1 SV=1           | 1.06        |
| Crbn     | Q8C7D2 | Protein cereblon OS=Mus musculus OX=10090 GN=Crbn PE=1 SV=1                                                  | 0.636666667 |
| Ttyh3    | Q6P5F7 | Protein tweety homolog 3 OS=Mus musculus OX=10090 GN=Ttyh3 PE=1 SV=1                                         | 1.023333333 |
| Cdkn1b   | P46414 | Cyclin-dependent kinase inhibitor 1B OS=Mus musculus OX=10090 GN=Cdkn1b PE=1 SV=2                            | 1.093333333 |
| Chchd1   | Q9CQA6 | Coiled-coil-helix-coiled-coil-helix domain-containing protein 1 OS=Mus musculus OX=10090 GN=Chchd1 PE=1 SV=1 | 1.32        |
| Slc1a4   | O35874 | Neutral amino acid transporter A OS=Mus musculus OX=10090 GN=Slc1a4 PE=1 SV=1                                | 0.783333333 |
| Marcksl1 | P28667 | MARCKS-related protein OS=Mus musculus OX=10090 GN=Marcksl1 PE=1 SV=2                                        | 0.683333333 |
| Ttc33    | Q9D6K7 | Tetratricopeptide repeat protein 33 OS=Mus musculus OX=10090 GN=Ttc33 PE=1 SV=1                              | 0.92        |
| Usp3     | Q91W36 | Ubiquitin carboxyl-terminal hydrolase 3 OS=Mus musculus OX=10090 GN=Usp3 PE=2 SV=1                           | 0.54        |
| Arhgap12 | Q8C0D4 | Rho GTPase-activating protein 12 OS=Mus musculus OX=10090 GN=Arhgap12 PE=1 SV=2                              | 1.406666667 |
| Carhsp1  | Q9CR86 | Calcium-regulated heat stable protein 1 OS=Mus musculus OX=10090 GN=Carhsp1 PE=1 SV=1                        | 0.696666667 |
| Lemd2    | Q6DVA0 | LEM domain-containing protein 2 OS=Mus musculus OX=10090 GN=Lemd2 PE=1 SV=1                                  | 0.923333333 |
| Mrpl50   | Q8VDT9 | 39S ribosomal protein L50 mitochondrial OS=Mus musculus OX=10090 GN=Mrpl50 PE=1 SV=2                         | 0.996666667 |
| Med31    | Q9CXU1 | Mediator of RNA polymerase II transcription subunit 31 OS=Mus musculus OX=10090 GN=Med31 PE=1 SV=1           | 0.91        |
| Bcas3    | Q8CCN5 | Breast carcinoma-amplified sequence 3 homolog OS=Mus musculus OX=10090 GN=Bcas3 PE=1 SV=2                    | 0.93        |
| Nusap1   | Q9ERH4 | Nucleolar and spindle-associated protein 1 OS=Mus musculus OX=10090 GN=Nusap1 PE=1 SV=1                      | 1.406666667 |
| Kif21a   | Q9QXL2 | Kinesin-like protein KIF21A OS=Mus musculus OX=10090 GN=Kif21a PE=1 SV=2                                     | 0.813333333 |

|           |        |                                                                                                                  |             |
|-----------|--------|------------------------------------------------------------------------------------------------------------------|-------------|
| Slc44a1   | Q6X893 | Choline transporter-like protein 1 OS=Mus musculus OX=10090 GN=Slc44a1 PE=1 SV=3                                 | 0.956666667 |
| Kti12     | Q9D1R2 | Protein KTI12 homolog OS=Mus musculus OX=10090 GN=Kti12 PE=1 SV=1                                                | 0.793333333 |
|           | Q922M7 | Ashwin OS=Mus musculus OX=10090 PE=1 SV=1                                                                        | 0.7         |
| Foxo3     | Q9WVH4 | Forkhead box protein O3 OS=Mus musculus OX=10090 GN=Foxo3 PE=1 SV=1                                              | 1.27        |
| Dck       | P43346 | Deoxycytidine kinase OS=Mus musculus OX=10090 GN=Dck PE=1 SV=1                                                   | 0.883333333 |
| Ggact     | Q923B0 | Gamma-glutamylaminecyclotransferase OS=Mus musculus OX=10090 GN=Ggact PE=1 SV=1                                  | 2.33        |
| Limd2     | Q8BGB5 | LIM domain-containing protein 2 OS=Mus musculus OX=10090 GN=Limd2 PE=1 SV=1                                      | 0.833333333 |
| Tor1aip2  | Q9ER81 | Torsin-1A-interacting protein 2 isoform IFRG15 OS=Mus musculus OX=10090 GN=Tor1aip2 PE=1 SV=1                    | 0.786666667 |
| Smg6      | P61406 | Telomerase-binding protein EST1A OS=Mus musculus OX=10090 GN=Smg6 PE=1 SV=1                                      | 1.27        |
| Cacul1    | Q8R0X2 | CDK2-associated and cullin domain-containing protein 1 OS=Mus musculus OX=10090 GN=Cacul1 PE=1 SV=1              | 0.716666667 |
| Med28     | Q920D3 | Mediator of RNA polymerase II transcription subunit 28 OS=Mus musculus OX=10090 GN=Med28 PE=1 SV=1               | 0.733333333 |
| Jmjd1c    | Q69ZK6 | Probable JmjC domain-containing histone demethylation protein 2C OS=Mus musculus OX=10090 GN=Jmjd1c PE=1 SV=1    |             |
| Ercc3     | P49135 | General transcription and DNA repair factor IIH helicase subunit XPB OS=Mus musculus OX=10090 GN=Ercc3 PE=1 SV=1 | 1.033333333 |
| Msra      | Q9D6Y7 | Mitochondrial peptide methionine sulfoxide reductase OS=Mus musculus OX=10090 GN=Msra PE=1 SV=1                  | 0.68        |
| Tnc       | Q80YX1 | Tenascin OS=Mus musculus OX=10090 GN=Tnc PE=1 SV=1                                                               |             |
| Chmp5     | Q9D7S9 | Charged multivesicular body protein 5 OS=Mus musculus OX=10090 GN=Chmp5 PE=1 SV=1                                | 1.053333333 |
| Qrsl1     | Q9CZN8 | Glutamyl-tRNA(Gln) amidotransferase subunit A mitochondrial OS=Mus musculus OX=10090 GN=Qrsl1 PE=1 SV=1          | 0.76        |
| Angptl2   | Q9R045 | Angiopietin-related protein 2 OS=Mus musculus OX=10090 GN=Angptl2 PE=2 SV=2                                      | 0.743333333 |
| Cdc42ep4  | Q9JM96 | Cdc42 effector protein 4 OS=Mus musculus OX=10090 GN=Cdc42ep4 PE=1 SV=1                                          | 1.01        |
| Rhbdd1    | Q8BHC7 | Rhomboid-related protein 4 OS=Mus musculus OX=10090 GN=Rhbdd1 PE=1 SV=1                                          | 1.193333333 |
| Phf23     | Q8BSN5 | PHD finger protein 23 OS=Mus musculus OX=10090 GN=Phf23 PE=2 SV=2                                                | 0.82        |
| Hgsnat    | Q3UDW8 | Heparan-alpha-glucosaminide N-acetyltransferase OS=Mus musculus OX=10090 GN=Hgsnat PE=1 SV=1                     | 0.89        |
| Timm17b   | Q9Z0V7 | Mitochondrial import inner membrane translocase subunit Tim17-B OS=Mus musculus OX=10090 GN=Timm17b PE=1 SV=1    | 6.506666667 |
| Derpc     | P0CG14 | Decreased expression in renal and prostate cancer protein OS=Mus musculus OX=10090 GN=Derpc PE=1 SV=1            | 1.043333333 |
| Tnfrsf10b | Q9QZM4 | Tumor necrosis factor receptor superfamily member 10B OS=Mus musculus OX=10090 GN=Tnfrsf10b PE=1 SV=1            | 0.835       |
| Med21     | Q9CQ39 | Mediator of RNA polymerase II transcription subunit 21 OS=Mus musculus OX=10090 GN=Med21 PE=1 SV=1               | 0.713333333 |
| Cd151     | O35566 | CD151 antigen OS=Mus musculus OX=10090 GN=Cd151 PE=1 SV=2                                                        | 0.75        |
| Ap1s1     | P61967 | AP-1 complex subunit sigma-1A OS=Mus musculus OX=10090 GN=Ap1s1 PE=1 SV=1                                        | 0.866666667 |
| Pcdhga4   | Q91XY4 | Protocadherin gamma-A4 OS=Mus musculus OX=10090 GN=Pcdhga4 PE=1 SV=1                                             | 0.796666667 |
| Ppt1      | O88531 | Palmitoyl-protein thioesterase 1 OS=Mus musculus OX=10090 GN=Ppt1 PE=1 SV=2                                      | 0.79        |
| Nedd8     | P29595 | NEDD8 OS=Mus musculus OX=10090 GN=Nedd8 PE=1 SV=2                                                                | 0.856666667 |
| Bola3     | Q8CEI1 | Bola-like protein 3 OS=Mus musculus OX=10090 GN=Bola3 PE=1 SV=1                                                  | 1.01        |
| Aup1      | P70295 | Ancient ubiquitous protein 1 OS=Mus musculus OX=10090 GN=Aup1 PE=1 SV=1                                          | 1.753333333 |
| Wdr44     | Q6NVE8 | WD repeat-containing protein 44 OS=Mus musculus OX=10090 GN=Wdr44 PE=1 SV=1                                      | 0.896666667 |

|         |        |                                                                                                                                              |             |
|---------|--------|----------------------------------------------------------------------------------------------------------------------------------------------|-------------|
| Unk     | Q8BL48 | RING finger protein unkempt homolog OS=Mus musculus OX=10090 GN=Unk PE=1 SV=1                                                                | 0.906666667 |
| Rps28   | P62858 | 40S ribosomal protein S28 OS=Mus musculus OX=10090 GN=Rps28 PE=1 SV=1                                                                        | 0.943333333 |
| Anapc11 | Q9CPX9 | Anaphase-promoting complex subunit 11 OS=Mus musculus OX=10090 GN=Anapc11 PE=3 SV=1                                                          | 0.626666667 |
| Tent4b  | Q68ED3 | Terminal nucleotidyltransferase 4B OS=Mus musculus OX=10090 GN=Tent4b PE=1 SV=2                                                              | 0.62        |
| Tmem30a | Q8VEK0 | Cell cycle control protein 50A OS=Mus musculus OX=10090 GN=Tmem30a PE=1 SV=1                                                                 | 0.963333333 |
| Dyrk1a  | Q61214 | Dual specificity tyrosine-phosphorylation-regulated kinase 1A OS=Mus musculus OX=10090 GN=Dyrk1a PE=1 SV=1                                   | 0.9         |
| Dusp12  | Q9D0T2 | Dual specificity protein phosphatase 12 OS=Mus musculus OX=10090 GN=Dusp12 PE=2 SV=1                                                         | 1.033333333 |
| Pten    | O08586 | Phosphatidylinositol 3 4 5-trisphosphate 3-phosphatase and dual-specificity protein phosphatase P OS=Mus musculus OX=10090 GN=Pten PE=1 SV=1 | 0.99        |
| Man1a2  | P39098 | Mannosyl-oligosaccharide 1 2-alpha-mannosidase IB OS=Mus musculus OX=10090 GN=Man1a2 PE=1 SV=1                                               | 0.89        |
| Chmp6   | P0C0A3 | Charged multivesicular body protein 6 OS=Mus musculus OX=10090 GN=Chmp6 PE=1 SV=2                                                            | 1.033333333 |
| Kin     | Q8K339 | DNA/RNA-binding protein KIN17 OS=Mus musculus OX=10090 GN=Kin PE=1 SV=1                                                                      | 0.465       |
| Slc7a6  | Q8BGK6 | Y+L amino acid transporter 2 OS=Mus musculus OX=10090 GN=Slc7a6 PE=1 SV=1                                                                    | 0.93        |
| Jagn1   | Q5XKN4 | Protein jagunal homolog 1 OS=Mus musculus OX=10090 GN=Jagn1 PE=1 SV=2                                                                        | 0.83        |
| Brp     | Q99MP8 | BRCA1-associated protein OS=Mus musculus OX=10090 GN=Brp PE=1 SV=1                                                                           | 1.806666667 |
| Kirrel1 | Q80W68 | Kin of IRRE-like protein 1 OS=Mus musculus OX=10090 GN=Kirrel1 PE=1 SV=1                                                                     | 0.79        |
| Mboat7  | Q8CHK3 | Lysophospholipid acyltransferase 7 OS=Mus musculus OX=10090 GN=Mboat7 PE=1 SV=1                                                              | 1.086666667 |
| Atg16l1 | Q8C0J2 | Autophagy-related protein 16-1 OS=Mus musculus OX=10090 GN=Atg16l1 PE=1 SV=1                                                                 | 0.91        |
| Timm29  | Q8BGX2 | Mitochondrial import inner membrane translocase subunit Tim29 OS=Mus musculus OX=10090 GN=Timm29 PE=1 SV=1                                   | 0.64        |
| Ier3ip1 | Q9CR20 | Immediate early response 3-interacting protein 1 OS=Mus musculus OX=10090 GN=Ier3ip1 PE=3 SV=1                                               | 0.773333333 |
| Slc12a9 | Q99MR3 | Solute carrier family 12 member 9 OS=Mus musculus OX=10090 GN=Slc12a9 PE=1 SV=2                                                              | 1.26        |
| Atp5md  | Q78IK2 | ATP synthase membrane subunit DAPIT mitochondrial OS=Mus musculus OX=10090 GN=Atp5md PE=1 SV=1                                               | 0.993333333 |
| Brat1   | Q8C3R1 | BRCA1-associated ATM activator 1 OS=Mus musculus OX=10090 GN=Brat1 PE=1 SV=1                                                                 | 1.653333333 |
| Mettl3  | Q8C3P7 | N6-adenosine-methyltransferase subunit METTL3 OS=Mus musculus OX=10090 GN=Mettl3 PE=1 SV=1                                                   | 0.94        |
| Ndufa1  | Q9CWX2 | Complex I intermediate-associated protein 30 mitochondrial OS=Mus musculus OX=10090 GN=Ndufa1 PE=1 SV=1                                      | 0.67        |
| Tacc1   | Q6Y685 | Transforming acidic coiled-coil-containing protein 1 OS=Mus musculus OX=10090 GN=Tacc1 PE=1 SV=1                                             | 1.226666667 |
| Loxl4   | Q924C6 | Lysyl oxidase homolog 4 OS=Mus musculus OX=10090 GN=Loxl4 PE=2 SV=2                                                                          | 1.233333333 |
| Ampd3   | O08739 | AMP deaminase 3 OS=Mus musculus OX=10090 GN=Ampd3 PE=1 SV=2                                                                                  | 0.876666667 |
| Vamp4   | O70480 | Vesicle-associated membrane protein 4 OS=Mus musculus OX=10090 GN=Vamp4 PE=1 SV=1                                                            | 0.986666667 |
| Ten1    | Q9D7K2 | CST complex subunit TEN1 OS=Mus musculus OX=10090 GN=Ten1 PE=1 SV=1                                                                          | 0.463333333 |
| Xiap    | Q60989 | E3 ubiquitin-protein ligase XIAP OS=Mus musculus OX=10090 GN=Xiap PE=1 SV=2                                                                  | 0.66        |
| Ncbp2   | Q9CQ49 | Nuclear cap-binding protein subunit 2 OS=Mus musculus OX=10090 GN=Ncbp2 PE=1 SV=1                                                            | 1.016666667 |
| Ric1    | Q69Z17 | Guanine nucleotide exchange factor subunit RIC1 OS=Mus musculus OX=10090 GN=Ric1 PE=1 SV=2                                                   | 0.745       |
| Dph1    | Q5NCQ5 | 2-(3-amino-3-carboxypropyl)histidine synthase subunit 1 OS=Mus musculus OX=10090 GN=Dph1 PE=1 SV=1                                           | 0.86        |
| Mtfr1l  | Q9CWE0 | Mitochondrial fission regulator 1-like OS=Mus musculus OX=10090 GN=Mtfr1l PE=1 SV=1                                                          | 0.766666667 |

|            |        |                                                                                               |             |
|------------|--------|-----------------------------------------------------------------------------------------------|-------------|
| Chchd4     | Q8VEA4 | Mitochondrial intermembrane space import and assembly protein 40 OS=Mus musculus OX=10090     | 0.896666667 |
| Bsdc1      | Q80Y55 | BSD domain-containing protein 1 OS=Mus musculus OX=10090 GN=Bsdc1 PE=1 SV=1                   |             |
| Nqo2       | Q9JI75 | Ribosyl-dihydro-nicotinamide dehydrogenase [quinone] OS=Mus musculus OX=10090 GN=Nqo2 PE=     | 0.95        |
| Cdk2ap1    | O35207 | Cyclin-dependent kinase 2-associated protein 1 OS=Mus musculus OX=10090 GN=Cdk2ap1 PE=1 SV=   | 0.933333333 |
| Lage3      | Q9CR70 | EKC/KEOPS complex subunit Lage3 OS=Mus musculus OX=10090 GN=Lage3 PE=2 SV=1                   | 0.933333333 |
| Slc39a7    | Q31125 | Zinc transporter SLC39A7 OS=Mus musculus OX=10090 GN=Slc39a7 PE=1 SV=2                        | 0.81        |
| Fanci      | Q8K368 | Fanconi anemia group I protein homolog OS=Mus musculus OX=10090 GN=Fanci PE=1 SV=2            | 1.74        |
| Eif2ak2    | Q03963 | Interferon-induced double-stranded RNA-activated protein kinase OS=Mus musculus OX=10090 GN=  | 0.686666667 |
| Sigmar1    | O55242 | Sigma non-opioid intracellular receptor 1 OS=Mus musculus OX=10090 GN=Sigmar1 PE=1 SV=1       | 1.483333333 |
| Cdca2      | Q14B71 | Cell division cycle-associated protein 2 OS=Mus musculus OX=10090 GN=Cdca2 PE=1 SV=2          | 1.06        |
| Dnmbp      | Q6TXD4 | Dynamin-binding protein OS=Mus musculus OX=10090 GN=Dnmbp PE=1 SV=2                           | 1.825       |
| Cacna2d1   | O08532 | Voltage-dependent calcium channel subunit alpha-2/delta-1 OS=Mus musculus OX=10090 GN=Cacr    | 1.115       |
| Aplp2      | Q06335 | Amyloid-like protein 2 OS=Mus musculus OX=10090 GN=Aplp2 PE=1 SV=4                            | 0.7         |
| Urgcp      | Q5NCI0 | Up-regulator of cell proliferation OS=Mus musculus OX=10090 GN=Urgcp PE=2 SV=1                | 0.76        |
| Cdkn2aipnl | Q9D211 | CDKN2AIP N-terminal-like protein OS=Mus musculus OX=10090 GN=Cdkn2aipnl PE=3 SV=1             | 1.066666667 |
| Bud13      | Q8R149 | BUD13 homolog OS=Mus musculus OX=10090 GN=Bud13 PE=1 SV=1                                     | 0.9         |
| Paat       | Q9D2Q3 | ATPase PAAT OS=Mus musculus OX=10090 GN=Paat PE=2 SV=1                                        | 0.7         |
| Mzt1       | Q8BUR9 | Mitotic-spindle organizing protein 1 OS=Mus musculus OX=10090 GN=Mzt1 PE=1 SV=1               | 0.816666667 |
| B3glct     | Q8BHT6 | Beta-1 3-glucosyltransferase OS=Mus musculus OX=10090 GN=B3glct PE=1 SV=3                     | 0.985       |
| Hjrp       | Q6PG16 | Holliday junction recognition protein OS=Mus musculus OX=10090 GN=Hjrp PE=1 SV=1              | 0.956666667 |
| Kifap3     | P70188 | Kinesin-associated protein 3 OS=Mus musculus OX=10090 GN=Kifap3 PE=1 SV=1                     | 1.105       |
| Cep170b    | Q80U49 | Centrosomal protein of 170 kDa protein B OS=Mus musculus OX=10090 GN=Cep170b PE=1 SV=2        | 1.293333333 |
| Uqc2       | Q9CQY6 | Ubiquinol-cytochrome-c reductase complex assembly factor 2 OS=Mus musculus OX=10090 GN=Uq     | 1.19        |
| Ints11     | Q9CWS4 | Integrator complex subunit 11 OS=Mus musculus OX=10090 GN=Ints11 PE=1 SV=1                    | 1.08        |
| Tp53bp2    | Q8CG79 | Apoptosis-stimulating of p53 protein 2 OS=Mus musculus OX=10090 GN=Tp53bp2 PE=1 SV=3          |             |
| Rybp       | Q8CCI5 | RING1 and YY1-binding protein OS=Mus musculus OX=10090 GN=Rybp PE=1 SV=1                      | 1.13        |
| Gemin7     | Q9CWY4 | Gem-associated protein 7 OS=Mus musculus OX=10090 GN=Gemin7 PE=2 SV=1                         | 0.826666667 |
| Scaf1      | Q5U4C3 | Splicing factor arginine/serine-rich 19 OS=Mus musculus OX=10090 GN=Scaf1 PE=1 SV=1           | 0.9         |
| Frmd4a     | Q8BIE6 | FERM domain-containing protein 4A OS=Mus musculus OX=10090 GN=Frmd4a PE=1 SV=2                | 1.156666667 |
| Pla2g6     | P97819 | 85/88 kDa calcium-independent phospholipase A2 OS=Mus musculus OX=10090 GN=Pla2g6 PE=1 S      | 1.13        |
| Pigu       | Q8K358 | Phosphatidylinositol glycan anchor biosynthesis class U protein OS=Mus musculus OX=10090 GN=P | 1.076666667 |
| Znf771     | Q8BJ90 | Zinc finger protein 771 OS=Mus musculus OX=10090 GN=Znf771 PE=2 SV=1                          | 0.823333333 |
| Taf6       | Q62311 | Transcription initiation factor TFIID subunit 6 OS=Mus musculus OX=10090 GN=Taf6 PE=1 SV=1    | 1.43        |
| Twsg1      | Q9EP52 | Twisted gastrulation protein homolog 1 OS=Mus musculus OX=10090 GN=Twsg1 PE=1 SV=1            | 1.276666667 |



|          |        |                                                                                                 |             |
|----------|--------|-------------------------------------------------------------------------------------------------|-------------|
| Zswim8   | Q3UHH1 | Zinc finger SWIM domain-containing protein 8 OS=Mus musculus OX=10090 GN=Zswim8 PE=1 SV=1       | 1.07        |
| Ssr3     | Q9DCF9 | Translocon-associated protein subunit gamma OS=Mus musculus OX=10090 GN=Ssr3 PE=1 SV=1          | 0.836666667 |
| Atf2     | P16951 | Cyclic AMP-dependent transcription factor ATF-2 OS=Mus musculus OX=10090 GN=Atf2 PE=1 SV=2      | 0.84        |
| Eny2     | Q9JIX0 | Transcription and mRNA export factor ENY2 OS=Mus musculus OX=10090 GN=Eny2 PE=1 SV=1            | 0.92        |
| Slc6a6   | O35316 | Sodium- and chloride-dependent taurine transporter OS=Mus musculus OX=10090 GN=Slc6a6 PE=1 SV=1 | 0.943333333 |
| Mrpl20   | Q9CQL4 | 39S ribosomal protein L20 mitochondrial OS=Mus musculus OX=10090 GN=Mrpl20 PE=1 SV=1            | 0.866666667 |
| Trappc1  | Q5NCF2 | Trafficking protein particle complex subunit 1 OS=Mus musculus OX=10090 GN=Trappc1 PE=1 SV=1    | 1.66        |
| Praf2    | Q9JIG8 | PRA1 family protein 2 OS=Mus musculus OX=10090 GN=Praf2 PE=1 SV=1                               | 0.796666667 |
| Rint1    | Q8BZ36 | RAD50-interacting protein 1 OS=Mus musculus OX=10090 GN=Rint1 PE=1 SV=2                         |             |
| Rnf121   | Q8R1Z9 | RING finger protein 121 OS=Mus musculus OX=10090 GN=Rnf121 PE=1 SV=1                            | 1.07        |
| Dse      | Q8BLI4 | Dermatan-sulfate epimerase OS=Mus musculus OX=10090 GN=Dse PE=2 SV=1                            | 1.205       |
|          | Q8VDP2 | UPF0428 protein CXorf56 homolog OS=Mus musculus OX=10090 PE=1 SV=1                              | 0.966666667 |
| Zfand6   | Q9DCH6 | AN1-type zinc finger protein 6 OS=Mus musculus OX=10090 GN=Zfand6 PE=1 SV=1                     | 0.83        |
| Mrpl55   | Q9CZ83 | 39S ribosomal protein L55 mitochondrial OS=Mus musculus OX=10090 GN=Mrpl55 PE=1 SV=1            | 1.236666667 |
| Dnajc24  | Q91ZF0 | DnaJ homolog subfamily C member 24 OS=Mus musculus OX=10090 GN=Dnajc24 PE=1 SV=4                | 0.585       |
| Taco1    | Q8K0Z7 | Translational activator of cytochrome c oxidase 1 OS=Mus musculus OX=10090 GN=Taco1 PE=1 SV=1   | 0.963333333 |
| Rnaset2b | C0HKG6 | Ribonuclease T2-B OS=Mus musculus OX=10090 GN=Rnaset2b PE=1 SV=1                                | 1.113333333 |
| Rnaset2a | C0HKG5 | Ribonuclease T2-A OS=Mus musculus OX=10090 GN=Rnaset2a PE=1 SV=1                                | 1.113333333 |
| Ctla2a   | P12399 | Protein CTLA-2-alpha OS=Mus musculus OX=10090 GN=Ctla2a PE=2 SV=2                               | 1.905       |
| Tspan31  | Q9CQ88 | Tetraspanin-31 OS=Mus musculus OX=10090 GN=Tspan31 PE=1 SV=1                                    | 0.896666667 |
| Nxt1     | Q9QZV9 | NTF2-related export protein 1 OS=Mus musculus OX=10090 GN=Nxt1 PE=1 SV=2                        | 1.213333333 |
| Ncaph2   | Q8BSP2 | Condensin-2 complex subunit H2 OS=Mus musculus OX=10090 GN=Ncaph2 PE=1 SV=1                     | 0.855       |
| Mpdz     | Q8VBX6 | Multiple PDZ domain protein OS=Mus musculus OX=10090 GN=Mpdz PE=1 SV=2                          | 0.516666667 |
| Cdca3    | Q99M54 | Cell division cycle-associated protein 3 OS=Mus musculus OX=10090 GN=Cdca3 PE=1 SV=2            | 1.156666667 |
| Asb6     | Q91ZU1 | Ankyrin repeat and SOCS box protein 6 OS=Mus musculus OX=10090 GN=Asb6 PE=1 SV=1                | 0.703333333 |
| Paox     | Q8C0L6 | Peroxisomal N(1)-acetyl-spermine/spermidine oxidase OS=Mus musculus OX=10090 GN=Paox PE=1 SV=1  | 1.143333333 |
| Sowahc   | Q8C0J6 | Ankyrin repeat domain-containing protein SOWAHC OS=Mus musculus OX=10090 GN=Sowahc PE=1 SV=1    | 2.203333333 |
| Rsrc1    | Q9DBU6 | Serine/Arginine-related protein 53 OS=Mus musculus OX=10090 GN=Rsrc1 PE=1 SV=1                  | 0.565       |
| Dguok    | Q9QX60 | Deoxyguanosine kinase mitochondrial OS=Mus musculus OX=10090 GN=Dguok PE=1 SV=3                 | 1.143333333 |
| Plin2    | P43883 | Perilipin-2 OS=Mus musculus OX=10090 GN=Plin2 PE=1 SV=2                                         | 1.18        |
| Gosr2    | O35166 | Golgi SNAP receptor complex member 2 OS=Mus musculus OX=10090 GN=Gosr2 PE=1 SV=2                | 1.083333333 |
| Cbx6     | Q9DBY5 | Chromobox protein homolog 6 OS=Mus musculus OX=10090 GN=Cbx6 PE=1 SV=2                          | 0.613333333 |
| Selenot  | P62342 | Thioredoxin reductase-like selenoprotein T OS=Mus musculus OX=10090 GN=Selenot PE=1 SV=2        | 0.84        |
| Tbc1d23  | Q8K0F1 | TBC1 domain family member 23 OS=Mus musculus OX=10090 GN=Tbc1d23 PE=1 SV=1                      | 0.665       |

|         |        |                                                                                                                           |             |
|---------|--------|---------------------------------------------------------------------------------------------------------------------------|-------------|
| Gemin2  | Q9CQQ4 | Gem-associated protein 2 OS=Mus musculus OX=10090 GN=Gemin2 PE=2 SV=1                                                     | 3.023333333 |
| Gpd1l   | Q3ULJ0 | Glycerol-3-phosphate dehydrogenase 1-like protein OS=Mus musculus OX=10090 GN=Gpd1l PE=1 SV=1                             | 0.913333333 |
| Chchd5  | Q9CQP3 | Coiled-coil-helix-coiled-coil-helix domain-containing protein 5 OS=Mus musculus OX=10090 GN=Chchd5 PE=1 SV=1              | 0.806666667 |
| Lmbrd2  | Q8C561 | G-protein coupled receptor-associated protein LMBRD2 OS=Mus musculus OX=10090 GN=Lmbrd2 PE=1 SV=1                         | 3.79        |
| Tmem11  | Q8BK08 | Transmembrane protein 11 mitochondrial OS=Mus musculus OX=10090 GN=Tmem11 PE=1 SV=1                                       | 0.756666667 |
| Gng2    | P63213 | Guanine nucleotide-binding protein G(I)/G(S)/G(O) subunit gamma-2 OS=Mus musculus OX=10090 GN=Gng2 PE=1 SV=1              | 0.76        |
| Zmat3   | O54836 | Zinc finger matrin-type protein 3 OS=Mus musculus OX=10090 GN=Zmat3 PE=2 SV=1                                             | 0.95        |
| Atp5mf  | P56135 | ATP synthase subunit f mitochondrial OS=Mus musculus OX=10090 GN=Atp5mf PE=1 SV=3                                         | 0.846666667 |
| Sin3b   | Q62141 | Paired amphipathic helix protein Sin3b OS=Mus musculus OX=10090 GN=Sin3b PE=1 SV=2                                        | 1.175       |
| Hif1an  | Q8BLR9 | Hypoxia-inducible factor 1-alpha inhibitor OS=Mus musculus OX=10090 GN=Hif1an PE=1 SV=2                                   | 0.94        |
| E2f4    | Q8R0K9 | Transcription factor E2F4 OS=Mus musculus OX=10090 GN=E2f4 PE=1 SV=1                                                      | 0.31        |
| Ecsit   | Q9QZH6 | Evolutionarily conserved signaling intermediate in Toll pathway mitochondrial OS=Mus musculus OX=10090 GN=Ecsit PE=1 SV=1 | 1.22        |
| Ccdc115 | Q8VE99 | Coiled-coil domain-containing protein 115 OS=Mus musculus OX=10090 GN=Ccdc115 PE=1 SV=1                                   | 0.99        |
| Phf21a  | Q6ZPK0 | PHD finger protein 21A OS=Mus musculus OX=10090 GN=Phf21a PE=1 SV=3                                                       | 0.963333333 |
| Eral1   | Q9CZU4 | GTPase Era mitochondrial OS=Mus musculus OX=10090 GN=Eral1 PE=2 SV=1                                                      | 0.806666667 |
| Yrdc    | Q3U5F4 | YrdC domain-containing protein mitochondrial OS=Mus musculus OX=10090 GN=Yrdc PE=1 SV=1                                   | 0.646666667 |
| Scamp2  | Q9ERN0 | Secretory carrier-associated membrane protein 2 OS=Mus musculus OX=10090 GN=Scamp2 PE=1 SV=1                              | 1.563333333 |
| Med11   | Q9D8C6 | Mediator of RNA polymerase II transcription subunit 11 OS=Mus musculus OX=10090 GN=Med11 PE=1 SV=1                        | 1.11        |
| Tsr2    | Q8C8T8 | Pre-rRNA-processing protein TSR2 homolog OS=Mus musculus OX=10090 GN=Tsr2 PE=1 SV=1                                       | 0.886666667 |
| Lrrc14  | Q8VC16 | Leucine-rich repeat-containing protein 14 OS=Mus musculus OX=10090 GN=Lrrc14 PE=1 SV=1                                    |             |
| Usp48   | Q3V0C5 | Ubiquitin carboxyl-terminal hydrolase 48 OS=Mus musculus OX=10090 GN=Usp48 PE=1 SV=2                                      | 0.84        |
| Zbtb7a  | O88939 | Zinc finger and BTB domain-containing protein 7A OS=Mus musculus OX=10090 GN=Zbtb7a PE=1 SV=1                             | 0.73        |
| Rbpms2  | Q8VC52 | RNA-binding protein with multiple splicing 2 OS=Mus musculus OX=10090 GN=Rbpms2 PE=1 SV=1                                 | 0.923333333 |
| Rrp36   | Q3UFY0 | Ribosomal RNA processing protein 36 homolog OS=Mus musculus OX=10090 GN=Rrp36 PE=1 SV=1                                   | 1.203333333 |
| Tmem109 | Q3UBX0 | Transmembrane protein 109 OS=Mus musculus OX=10090 GN=Tmem109 PE=1 SV=2                                                   | 0.866666667 |
| Rnd3    | P61588 | Rho-related GTP-binding protein RhoE OS=Mus musculus OX=10090 GN=Rnd3 PE=1 SV=1                                           | 1.29        |
| Znf516  | Q7TSH3 | Zinc finger protein 516 OS=Mus musculus OX=10090 GN=Znf516 PE=1 SV=1                                                      | 1.125       |
| Tmem59  | Q9QY73 | Transmembrane protein 59 OS=Mus musculus OX=10090 GN=Tmem59 PE=1 SV=2                                                     | 0.68        |
| Urm1    | Q9D2P4 | Ubiquitin-related modifier 1 OS=Mus musculus OX=10090 GN=Urm1 PE=1 SV=1                                                   | 0.336666667 |
| Wfs1    | P56695 | Wolframin OS=Mus musculus OX=10090 GN=Wfs1 PE=1 SV=1                                                                      | 1.2         |
| Gfra1   | P97785 | GNDF family receptor alpha-1 OS=Mus musculus OX=10090 GN=Gfra1 PE=1 SV=2                                                  | 0.916666667 |
| Reep5   | Q60870 | Receptor expression-enhancing protein 5 OS=Mus musculus OX=10090 GN=Reep5 PE=1 SV=1                                       | 0.943333333 |
| Mex3d   | Q3UE17 | RNA-binding protein MEX3D OS=Mus musculus OX=10090 GN=Mex3d PE=1 SV=2                                                     | 0.96        |
| Dtd2    | Q8BHA3 | D-aminoacyl-tRNA deacylase 2 OS=Mus musculus OX=10090 GN=Dtd2 PE=1 SV=1                                                   | 1           |

|          |        |                                                                                                                         |             |
|----------|--------|-------------------------------------------------------------------------------------------------------------------------|-------------|
| Cd47     | Q61735 | Leukocyte surface antigen CD47 OS=Mus musculus OX=10090 GN=Cd47 PE=1 SV=2                                               | 0.95        |
| Tollip   | Q9QZ06 | Toll-interacting protein OS=Mus musculus OX=10090 GN=Tollip PE=1 SV=1                                                   | 1.013333333 |
| Fibp     | Q9JI19 | Acidic fibroblast growth factor intracellular-binding protein OS=Mus musculus OX=10090 GN=Fibp                          | 1.196666667 |
| Trappc4  | Q9ES56 | Trafficking protein particle complex subunit 4 OS=Mus musculus OX=10090 GN=Trappc4 PE=1 SV=1                            | 1.076666667 |
| Alkbh5   | Q3TSG4 | RNA demethylase ALKBH5 OS=Mus musculus OX=10090 GN=Alkbh5 PE=1 SV=2                                                     | 1.876666667 |
| Clcn7    | O70496 | H(+)/Cl(-) exchange transporter 7 OS=Mus musculus OX=10090 GN=Clcn7 PE=1 SV=1                                           | 1.073333333 |
| Crat     | P47934 | Carnitine O-acetyltransferase OS=Mus musculus OX=10090 GN=Crat PE=1 SV=3                                                | 1.233333333 |
| Arhgap22 | Q8BL80 | Rho GTPase-activating protein 22 OS=Mus musculus OX=10090 GN=Arhgap22 PE=1 SV=2                                         | 0.615       |
| Mettl26  | Q9DCS2 | Methyltransferase-like 26 OS=Mus musculus OX=10090 GN=Mettl26 PE=1 SV=1                                                 | 1.295       |
| Pfn2     | Q9JJV2 | Profilin-2 OS=Mus musculus OX=10090 GN=Pfn2 PE=1 SV=3                                                                   | 0.9         |
| Ebag9    | Q9D0V7 | Receptor-binding cancer antigen expressed on SiSo cells OS=Mus musculus OX=10090 GN=Ebag9 PE=1 SV=1                     | 0.6         |
| Gstt1    | Q64471 | Glutathione S-transferase theta-1 OS=Mus musculus OX=10090 GN=Gstt1 PE=1 SV=4                                           | 0.875       |
| Gas7     | Q60780 | Growth arrest-specific protein 7 OS=Mus musculus OX=10090 GN=Gas7 PE=1 SV=1                                             | 0.81        |
| Mrpl30   | Q9D7N6 | 39S ribosomal protein L30 mitochondrial OS=Mus musculus OX=10090 GN=Mrpl30 PE=1 SV=1                                    | 0.763333333 |
| Coprs    | Q9CQ13 | Coordinator of PRMT5 and differentiation stimulator OS=Mus musculus OX=10090 GN=Coprs PE=1 SV=1                         | 0.826666667 |
| Dgat1    | Q9Z2A7 | Diacylglycerol O-acyltransferase 1 OS=Mus musculus OX=10090 GN=Dgat1 PE=1 SV=1                                          | 0.983333333 |
| Med18    | Q9CZ82 | Mediator of RNA polymerase II transcription subunit 18 OS=Mus musculus OX=10090 GN=Med18 PE=1 SV=1                      | 0.916666667 |
| Tsr3     | Q5HZH2 | 18S rRNA aminocarboxypropyltransferase OS=Mus musculus OX=10090 GN=Tsr3 PE=1 SV=1                                       | 1.726666667 |
| Mrpl41   | Q9CQN7 | 39S ribosomal protein L41 mitochondrial OS=Mus musculus OX=10090 GN=Mrpl41 PE=1 SV=1                                    | 0.726666667 |
| Pacs1    | Q8K212 | Phosphofurin acidic cluster sorting protein 1 OS=Mus musculus OX=10090 GN=Pacs1 PE=1 SV=2                               | 1.81        |
| Camsap2  | Q8C1B1 | Calmodulin-regulated spectrin-associated protein 2 OS=Mus musculus OX=10090 GN=Camsap2 PE=1 SV=1                        | 1.346666667 |
| Mtstp6   | P00848 | ATP synthase subunit a OS=Mus musculus OX=10090 GN=Mtstp6 PE=1 SV=1                                                     | 0.846666667 |
| Col16a1  | Q8BLX7 | Collagen alpha-1(XVI) chain OS=Mus musculus OX=10090 GN=Col16a1 PE=1 SV=2                                               | 0.77        |
| Aasdhpt  | Q9CQF6 | L-aminoadipate-semialdehyde dehydrogenase-phosphopantetheinyl transferase OS=Mus musculus OX=10090 GN=Aasdhpt PE=1 SV=1 | 0.665       |
| Nfya     | P23708 | Nuclear transcription factor Y subunit alpha OS=Mus musculus OX=10090 GN=Nfya PE=1 SV=2                                 | 0.73        |
| Hmg20a   | Q9DC33 | High mobility group protein 20A OS=Mus musculus OX=10090 GN=Hmg20a PE=1 SV=1                                            | 0.74        |
| Eya3     | P97480 | Eyes absent homolog 3 OS=Mus musculus OX=10090 GN=Eya3 PE=1 SV=2                                                        | 0.606666667 |
| Uqcr10   | Q8R111 | Cytochrome b-c1 complex subunit 9 OS=Mus musculus OX=10090 GN=Uqcr10 PE=1 SV=1                                          | 0.973333333 |
| Tbc1d31  | Q6NXY1 | TBC1 domain family member 31 OS=Mus musculus OX=10090 GN=Tbc1d31 PE=1 SV=1                                              | 0.81        |
| Rel1     | Q8K2J7 | RELT-like protein 1 OS=Mus musculus OX=10090 GN=Rel1 PE=2 SV=2                                                          | 1.09        |
| Mapk7    | Q9WVS8 | Mitogen-activated protein kinase 7 OS=Mus musculus OX=10090 GN=Mapk7 PE=1 SV=1                                          | 4.045       |
| Zdhhc5   | Q8VDZ4 | Palmitoyltransferase ZDHHC5 OS=Mus musculus OX=10090 GN=Zdhhc5 PE=1 SV=1                                                | 0.893333333 |
| Macrod1  | Q922B1 | ADP-ribose glycohydrolase MACROD1 OS=Mus musculus OX=10090 GN=Macrod1 PE=1 SV=2                                         | 0.86        |
| Igf2     | P09535 | Insulin-like growth factor II OS=Mus musculus OX=10090 GN=Igf2 PE=1 SV=1                                                | 0.57        |

|          |        |                                                                                             |             |
|----------|--------|---------------------------------------------------------------------------------------------|-------------|
| Wdr59    | Q8C0M0 | GATOR complex protein WDR59 OS=Mus musculus OX=10090 GN=Wdr59 PE=1 SV=2                     | 0.605       |
| Faim     | Q9WUD8 | Fas apoptotic inhibitory molecule 1 OS=Mus musculus OX=10090 GN=Faim PE=1 SV=1              | 0.95        |
| Bet1     | O35623 | BET1 homolog OS=Mus musculus OX=10090 GN=Bet1 PE=1 SV=1                                     | 1.046666667 |
| Spc25    | Q3UA16 | Kinetochore protein Spc25 OS=Mus musculus OX=10090 GN=Spc25 PE=2 SV=1                       | 0.73        |
| Fahd1    | Q8R0F8 | Acylpyruvase FAHD1 mitochondrial OS=Mus musculus OX=10090 GN=Fahd1 PE=1 SV=2                | 0.6         |
| Ly6e     | Q64253 | Lymphocyte antigen 6E OS=Mus musculus OX=10090 GN=Ly6e PE=1 SV=2                            | 1.033333333 |
| Rpl36    | P47964 | 60S ribosomal protein L36 OS=Mus musculus OX=10090 GN=Rpl36 PE=1 SV=2                       | 0.923333333 |
| Dab2ip   | Q3UHC7 | Disabled homolog 2-interacting protein OS=Mus musculus OX=10090 GN=Dab2ip PE=1 SV=1         | 0.646666667 |
| Sike1    | Q9CPR7 | Suppressor of IKBKE 1 OS=Mus musculus OX=10090 GN=Sike1 PE=1 SV=1                           | 0.94        |
| Acyp2    | P56375 | Acylphosphatase-2 OS=Mus musculus OX=10090 GN=Acyp2 PE=1 SV=2                               | 1.04        |
| Slc1a3   | P56564 | Excitatory amino acid transporter 1 OS=Mus musculus OX=10090 GN=Slc1a3 PE=1 SV=2            | 1.015       |
| Znf148   | Q61624 | Zinc finger protein 148 OS=Mus musculus OX=10090 GN=Znf148 PE=1 SV=2                        | 2.406666667 |
| Mtg1     | Q8R2R6 | Mitochondrial ribosome-associated GTPase 1 OS=Mus musculus OX=10090 GN=Mtg1 PE=1 SV=2       | 0.675       |
| Mycbp    | Q9EQS3 | c-Myc-binding protein OS=Mus musculus OX=10090 GN=Mycbp PE=1 SV=5                           | 0.77        |
| Msln     | Q61468 | Mesothelin OS=Mus musculus OX=10090 GN=Msln PE=1 SV=1                                       | 1.663333333 |
| Pggt1b   | Q8BUY9 | Geranylgeranyl transferase type-1 subunit beta OS=Mus musculus OX=10090 GN=Pggt1b PE=1 SV=1 | 0.795       |
| Calcoco1 | Q8CGU1 | Calcium-binding and coiled-coil domain-containing protein 1 OS=Mus musculus OX=10090 GN=Cal | 1.075       |
| Fbxo7    | Q3U7U3 | F-box only protein 7 OS=Mus musculus OX=10090 GN=Fbxo7 PE=1 SV=2                            | 1.336666667 |
| Cx3cl1   | O35188 | Fractalkine OS=Mus musculus OX=10090 GN=Cx3cl1 PE=1 SV=3                                    | 0.83        |
| Clcn5    | Q9WVD4 | H(+)/Cl(-) exchange transporter 5 OS=Mus musculus OX=10090 GN=Clcn5 PE=1 SV=2               | 0.993333333 |
| Vps72    | Q62481 | Vacuolar protein sorting-associated protein 72 homolog OS=Mus musculus OX=10090 GN=Vps72 P  | 1.33        |
| Klra4    | Q60651 | Killer cell lectin-like receptor 4 OS=Mus musculus OX=10090 GN=Klra4 PE=1 SV=2              | 1.053333333 |
| Aagab    | Q8R2R3 | Alpha- and gamma-adaptin-binding protein p34 OS=Mus musculus OX=10090 GN=Aagab PE=1 SV=2    | 1.016666667 |
| Ankrd40  | Q5SUE8 | Ankyrin repeat domain-containing protein 40 OS=Mus musculus OX=10090 GN=Ankrd40 PE=1 SV=1   | 0.963333333 |
| Coq3     | Q8BMS4 | Ubiquinone biosynthesis O-methyltransferase mitochondrial OS=Mus musculus OX=10090 GN=Coc   | 0.45        |
| Vcpkmt   | Q8C436 | Protein-lysine methyltransferase METTL21D OS=Mus musculus OX=10090 GN=Vcpkmt PE=2 SV=2      |             |
| Prkag2   | Q91WG5 | 5'-AMP-activated protein kinase subunit gamma-2 OS=Mus musculus OX=10090 GN=Prkag2 PE=1 Sv  | 0.703333333 |
| Twink    | Q8CIW5 | Twinkle protein mitochondrial OS=Mus musculus OX=10090 GN=Twink PE=2 SV=1                   | 1.35        |
| Dcaf5    | Q80T85 | DDB1- and CUL4-associated factor 5 OS=Mus musculus OX=10090 GN=Dcaf5 PE=1 SV=2              |             |
|          | Q3TQI7 | Telomere length and silencing protein 1 homolog OS=Mus musculus OX=10090 PE=1 SV=2          | 0.59        |
| Mpp5     | Q9JLB2 | MAGUK p55 subfamily member 5 OS=Mus musculus OX=10090 GN=Mpp5 PE=1 SV=1                     | 0.86        |
| Drosha   | Q5HZJ0 | Ribonuclease 3 OS=Mus musculus OX=10090 GN=Drosha PE=1 SV=1                                 | 1.13        |
| Nat2     | P50295 | Arylamine N-acetyltransferase 2 OS=Mus musculus OX=10090 GN=Nat2 PE=1 SV=1                  | 3           |
| Psrc1    | Q9D0P7 | Proline/serine-rich coiled-coil protein 1 OS=Mus musculus OX=10090 GN=Psrc1 PE=1 SV=2       | 1.316666667 |

|          |        |                                                                                                                       |             |
|----------|--------|-----------------------------------------------------------------------------------------------------------------------|-------------|
| Mrpl33   | Q9CQP0 | 39S ribosomal protein L33 mitochondrial OS=Mus musculus OX=10090 GN=Mrpl33 PE=1 SV=1                                  | 0.806666667 |
| Arap1    | Q4LDD4 | Arf-GAP with Rho-GAP domain ANK repeat and PH domain-containing protein 1 OS=Mus musculus OX=10090 GN=Arap1 PE=1 SV=1 | 1.14        |
| Tbc1d10a | P58802 | TBC1 domain family member 10A OS=Mus musculus OX=10090 GN=Tbc1d10a PE=1 SV=1                                          | 0.845       |
| Afap1    | Q80YS6 | Actin filament-associated protein 1 OS=Mus musculus OX=10090 GN=Afap1 PE=1 SV=1                                       | 0.81        |
| Tmx2     | Q9D710 | Thioredoxin-related transmembrane protein 2 OS=Mus musculus OX=10090 GN=Tmx2 PE=1 SV=1                                | 0.9         |
| Cnih4    | Q9CX13 | Protein cornichon homolog 4 OS=Mus musculus OX=10090 GN=Cnih4 PE=2 SV=1                                               | 0.776666667 |
| Nsmce3   | Q9CPR8 | Non-structural maintenance of chromosomes element 3 homolog OS=Mus musculus OX=10090 GN=Nsmce3 PE=1 SV=1              | 1.456666667 |
| Lats1    | Q8BYR2 | Serine/threonine-protein kinase LATS1 OS=Mus musculus OX=10090 GN=Lats1 PE=1 SV=3                                     | 1.095       |
| Terf2    | O35144 | Telomeric repeat-binding factor 2 OS=Mus musculus OX=10090 GN=Terf2 PE=1 SV=3                                         | 0.706666667 |
| Fam234b  | Q8BYI8 | Protein FAM234B OS=Mus musculus OX=10090 GN=Fam234b PE=1 SV=1                                                         | 1.033333333 |
| Cox7c    | P17665 | Cytochrome c oxidase subunit 7C mitochondrial OS=Mus musculus OX=10090 GN=Cox7c PE=1 SV=1                             | 0.816666667 |
| Cbx4     | O55187 | E3 SUMO-protein ligase CBX4 OS=Mus musculus OX=10090 GN=Cbx4 PE=1 SV=2                                                | 1.175       |
| Nuf2     | Q99P69 | Kinetochore protein Nuf2 OS=Mus musculus OX=10090 GN=Nuf2 PE=1 SV=2                                                   | 1.456666667 |
| Slc30a7  | Q9JKN1 | Zinc transporter 7 OS=Mus musculus OX=10090 GN=Slc30a7 PE=1 SV=1                                                      | 0.72        |
| Mitd1    | Q8VDV8 | MIT domain-containing protein 1 OS=Mus musculus OX=10090 GN=Mitd1 PE=1 SV=1                                           | 1.225       |
| Brca1    | P48754 | Breast cancer type 1 susceptibility protein homolog OS=Mus musculus OX=10090 GN=Brca1 PE=1 SV=1                       | 1.145       |
| Ccdc9    | Q8VC31 | Coiled-coil domain-containing protein 9 OS=Mus musculus OX=10090 GN=Ccdc9 PE=1 SV=1                                   | 1.43        |
| Pitpm1   | O35954 | Membrane-associated phosphatidylinositol transfer protein 1 OS=Mus musculus OX=10090 GN=Pitpm1 PE=1 SV=1              | 1.43        |
| Glt8d1   | Q6NSU3 | Glycosyltransferase 8 domain-containing protein 1 OS=Mus musculus OX=10090 GN=Glt8d1 PE=1 SV=1                        | 0.606666667 |
| Cdc42ep3 | Q9CQC5 | Cdc42 effector protein 3 OS=Mus musculus OX=10090 GN=Cdc42ep3 PE=1 SV=1                                               | 1.283333333 |
| Fadd     | Q61160 | FAS-associated death domain protein OS=Mus musculus OX=10090 GN=Fadd PE=1 SV=1                                        | 1.283333333 |
| Wdr81    | Q5ND34 | WD repeat-containing protein 81 OS=Mus musculus OX=10090 GN=Wdr81 PE=1 SV=2                                           | 0.825       |
| Tmem70   | Q921N7 | Transmembrane protein 70 mitochondrial OS=Mus musculus OX=10090 GN=Tmem70 PE=2 SV=2                                   | 6.803333333 |
| Lpgat1   | Q91YX5 | Acyl-CoA:lysophosphatidylglycerol acyltransferase 1 OS=Mus musculus OX=10090 GN=Lpgat1 PE=1 SV=1                      | 1.055       |
| Slc25a32 | Q8BMG8 | Mitochondrial folate transporter/carrier OS=Mus musculus OX=10090 GN=Slc25a32 PE=1 SV=1                               | 1.24        |
| Tprkb    | Q8QZZ7 | EKC/KEOPS complex subunit Tprkb OS=Mus musculus OX=10090 GN=Tprkb PE=1 SV=1                                           | 0.806666667 |
| Steap3   | Q8CI59 | Metalloreductase STEAP3 OS=Mus musculus OX=10090 GN=Steap3 PE=1 SV=1                                                  | 2.915       |
| Hook2    | Q7TMK6 | Protein Hook homolog 2 OS=Mus musculus OX=10090 GN=Hook2 PE=1 SV=3                                                    | 0.89        |
| Lsm7     | Q9CQK8 | U6 snRNA-associated Sm-like protein LSM7 OS=Mus musculus OX=10090 GN=Lsm7 PE=1 SV=1                                   | 0.923333333 |
| Cxxc1    | Q9CWW7 | CXXC-type zinc finger protein 1 OS=Mus musculus OX=10090 GN=Cxxc1 PE=1 SV=1                                           | 0.87        |
| Abt1     | Q9QYL7 | Activator of basal transcription 1 OS=Mus musculus OX=10090 GN=Abt1 PE=2 SV=1                                         | 1.356666667 |
| Abcg2    | Q7TMS5 | Broad substrate specificity ATP-binding cassette transporter ABCG2 OS=Mus musculus OX=10090 GN=Abcg2 PE=1 SV=1        | 0.75        |
| Mrfap1   | Q9CQL7 | MORF4 family-associated protein 1 OS=Mus musculus OX=10090 GN=Mrfap1 PE=1 SV=1                                        | 0.883333333 |
| Sipa1    | P46062 | Signal-induced proliferation-associated protein 1 OS=Mus musculus OX=10090 GN=Sipa1 PE=1 SV=1                         | 1.016666667 |



|           |        |                                                                                                                          |             |
|-----------|--------|--------------------------------------------------------------------------------------------------------------------------|-------------|
| Snip1     | Q8BIZ6 | Smad nuclear-interacting protein 1 OS=Mus musculus OX=10090 GN=Snip1 PE=1 SV=1                                           | 0.526666667 |
| Asb3      | Q9WV72 | Ankyrin repeat and SOCS box protein 3 OS=Mus musculus OX=10090 GN=Asb3 PE=1 SV=2                                         | 0.895       |
| Smg7      | Q5RJH6 | Protein SMG7 OS=Mus musculus OX=10090 GN=Smg7 PE=2 SV=1                                                                  | 1.725       |
| Plau      | P06869 | Urokinase-type plasminogen activator OS=Mus musculus OX=10090 GN=Plau PE=1 SV=1                                          | 1.435       |
| Elp6      | Q8BK75 | Elongator complex protein 6 OS=Mus musculus OX=10090 GN=Elp6 PE=2 SV=1                                                   | 0.963333333 |
| Sash1     | P59808 | SAM and SH3 domain-containing protein 1 OS=Mus musculus OX=10090 GN=Sash1 PE=1 SV=1                                      | 0.925       |
| Hba       | P01942 | Hemoglobin subunit alpha OS=Mus musculus OX=10090 GN=Hba PE=1 SV=2                                                       | 0.13        |
| Rbsn      | Q80Y56 | Rabenosyn-5 OS=Mus musculus OX=10090 GN=Rbsn PE=1 SV=1                                                                   | 1.893333333 |
| Cisd2     | Q9CQB5 | CDGSH iron-sulfur domain-containing protein 2 OS=Mus musculus OX=10090 GN=Cisd2 PE=1 SV=1                                | 0.69        |
| Polr3c    | Q9D483 | DNA-directed RNA polymerase III subunit RPC3 OS=Mus musculus OX=10090 GN=Polr3c PE=1 SV=1                                | 1.346666667 |
| Cmc2      | Q8K199 | COX assembly mitochondrial protein 2 homolog OS=Mus musculus OX=10090 GN=Cmc2 PE=3 SV=1                                  | 0.853333333 |
| Rnaseh2b  | Q80ZV0 | Ribonuclease H2 subunit B OS=Mus musculus OX=10090 GN=Rnaseh2b PE=1 SV=2                                                 | 0.696666667 |
| Pxk       | Q8BX57 | PX domain-containing protein kinase-like protein OS=Mus musculus OX=10090 GN=Pxk PE=1 SV=2                               | 0.803333333 |
| Tram2     | Q924Z5 | Translocating chain-associated membrane protein 2 OS=Mus musculus OX=10090 GN=Tram2 PE=1 SV=1                            | 0.81        |
| Ddx55     | Q6ZPL9 | ATP-dependent RNA helicase DDX55 OS=Mus musculus OX=10090 GN=Ddx55 PE=1 SV=2                                             | 0.536666667 |
| Rp2       | Q9EPK2 | Protein XRP2 OS=Mus musculus OX=10090 GN=Rp2 PE=1 SV=3                                                                   | 1.025       |
| Gorasp1   | Q91X51 | Golgi reassembly-stacking protein 1 OS=Mus musculus OX=10090 GN=Gorasp1 PE=1 SV=3                                        | 7.68        |
| Oxr1      | Q4KMM3 | Oxidation resistance protein 1 OS=Mus musculus OX=10090 GN=Oxr1 PE=1 SV=3                                                | 2.885       |
| Itm2c     | Q91VK4 | Integral membrane protein 2C OS=Mus musculus OX=10090 GN=Itm2c PE=1 SV=2                                                 | 0.473333333 |
| Gcc1      | Q9D4H2 | GRIP and coiled-coil domain-containing protein 1 OS=Mus musculus OX=10090 GN=Gcc1 PE=1 SV=1                              | 0.83        |
| Asrgl1    | Q8C0M9 | Isoaspartyl peptidase/L-asparaginase OS=Mus musculus OX=10090 GN=Asrgl1 PE=1 SV=1                                        | 1.06        |
| Rbmx2     | Q8R0F5 | RNA-binding motif protein X-linked 2 OS=Mus musculus OX=10090 GN=Rbmx2 PE=1 SV=1                                         | 1.393333333 |
| Ctdsp1    | P58466 | Carboxy-terminal domain RNA polymerase II polypeptide A small phosphatase 1 OS=Mus musculus OX=10090 GN=Ctdsp1 PE=1 SV=1 | 1.056666667 |
| Polr2l    | P62876 | DNA-directed RNA polymerases I II and III subunit RPABC5 OS=Mus musculus OX=10090 GN=Polr2l PE=1 SV=1                    | 0.83        |
| Ift122    | Q6NWW3 | Intraflagellar transport protein 122 homolog OS=Mus musculus OX=10090 GN=Ift122 PE=1 SV=1                                | 0.565       |
| Slc35f6   | Q8VE96 | Solute carrier family 35 member F6 OS=Mus musculus OX=10090 GN=Slc35f6 PE=1 SV=1                                         | 1.15        |
| Max       | P28574 | Protein max OS=Mus musculus OX=10090 GN=Max PE=1 SV=2                                                                    | 1.326666667 |
| D8Ert738e | Q8R1F0 | Leydig cell tumor 10 kDa protein homolog OS=Mus musculus OX=10090 GN=D8Ert738e PE=3 SV=1                                 | 1.446666667 |
| Arhgap21  | Q6DFV3 | Rho GTPase-activating protein 21 OS=Mus musculus OX=10090 GN=Arhgap21 PE=1 SV=1                                          | 1.446666667 |
| Znf281    | Q99LI5 | Zinc finger protein 281 OS=Mus musculus OX=10090 GN=Znf281 PE=1 SV=1                                                     | 1.35        |
| Oxnad1    | Q8VE38 | Oxidoreductase NAD-binding domain-containing protein 1 OS=Mus musculus OX=10090 GN=Oxnad1 PE=1 SV=1                      | 1.663333333 |
| Bcl2l1    | Q64373 | Bcl-2-like protein 1 OS=Mus musculus OX=10090 GN=Bcl2l1 PE=1 SV=1                                                        | 0.88        |
| Nectin2   | P32507 | Nectin-2 OS=Mus musculus OX=10090 GN=Nectin2 PE=1 SV=2                                                                   | 0.86        |
| Abhd17b   | Q7M759 | Alpha/beta hydrolase domain-containing protein 17B OS=Mus musculus OX=10090 GN=Abhd17b PE=1 SV=1                         | 1.3         |

|         |        |                                                                                                      |             |
|---------|--------|------------------------------------------------------------------------------------------------------|-------------|
| Slc35b1 | P97858 | Solute carrier family 35 member B1 OS=Mus musculus OX=10090 GN=Slc35b1 PE=1 SV=1                     | 1.843333333 |
| Arrb2   | Q91YI4 | Beta-arrestin-2 OS=Mus musculus OX=10090 GN=Arrb2 PE=1 SV=1                                          | 1.036666667 |
| Ift81   | O35594 | Intraflagellar transport protein 81 homolog OS=Mus musculus OX=10090 GN=Ift81 PE=1 SV=4              |             |
| B4gat1  | Q8BWP8 | Beta-1 4-glucuronyltransferase 1 OS=Mus musculus OX=10090 GN=B4gat1 PE=1 SV=1                        | 2.36        |
| Tst     | P52196 | Thiosulfate sulfurtransferase OS=Mus musculus OX=10090 GN=Tst PE=1 SV=3                              | 1.116666667 |
| Rsl24d1 | Q99L28 | Probable ribosome biogenesis protein RLP24 OS=Mus musculus OX=10090 GN=Rsl24d1 PE=2 SV=1             | 0.846666667 |
| Tgs1    | Q923W1 | Trimethylguanosine synthase OS=Mus musculus OX=10090 GN=Tgs1 PE=1 SV=2                               | 0.93        |
| Lrp6    | O88572 | Low-density lipoprotein receptor-related protein 6 OS=Mus musculus OX=10090 GN=Lrp6 PE=1 SV=         | 0.77        |
| Gpkow   | Q56A08 | G-patch domain and KOW motifs-containing protein OS=Mus musculus OX=10090 GN=Gpkow PE=1              |             |
| Slc30a6 | Q8BJM5 | Zinc transporter 6 OS=Mus musculus OX=10090 GN=Slc30a6 PE=1 SV=1                                     |             |
| Mpdu1   | Q9R0Q9 | Mannose-P-dolichol utilization defect 1 protein OS=Mus musculus OX=10090 GN=Mpdu1 PE=1 SV=           | 0.73        |
| Plekha2 | Q9ERS5 | Pleckstrin homology domain-containing family A member 2 OS=Mus musculus OX=10090 GN=Plekha2 PE=1 SV= | 0.97        |
| Arpp19  | P56212 | cAMP-regulated phosphoprotein 19 OS=Mus musculus OX=10090 GN=Arpp19 PE=1 SV=2                        | 0.85        |
| Pi4kb   | Q8BKC8 | Phosphatidylinositol 4-kinase beta OS=Mus musculus OX=10090 GN=Pi4kb PE=1 SV=2                       | 0.67        |
| Chst14  | Q80V53 | Carbohydrate sulfotransferase 14 OS=Mus musculus OX=10090 GN=Chst14 PE=2 SV=2                        | 1.69        |
| Sirt2   | Q8VDQ8 | NAD-dependent protein deacetylase sirtuin-2 OS=Mus musculus OX=10090 GN=Sirt2 PE=1 SV=2              |             |
| Ralgapb | Q8BQZ4 | Ral GTPase-activating protein subunit beta OS=Mus musculus OX=10090 GN=Ralgapb PE=1 SV=2             | 0.86        |
| Ubxn6   | Q99PL6 | UBX domain-containing protein 6 OS=Mus musculus OX=10090 GN=Ubxn6 PE=1 SV=1                          | 1.47        |
| Ctu1    | Q99J10 | Cytoplasmic tRNA 2-thiolation protein 1 OS=Mus musculus OX=10090 GN=Ctu1 PE=2 SV=1                   | 1.65        |
| Mcam    | Q8R2Y2 | Cell surface glycoprotein MUC18 OS=Mus musculus OX=10090 GN=Mcam PE=1 SV=1                           | 0.695       |
| Irgq    | Q8VIM9 | Immunity-related GTPase family Q protein OS=Mus musculus OX=10090 GN=Irgq PE=1 SV=1                  | 48.74       |
| Bphl    | Q8R164 | Valacyclovir hydrolase OS=Mus musculus OX=10090 GN=Bphl PE=1 SV=1                                    | 1.055       |
| Mmab    | Q9D273 | Corrinoid adenosyltransferase OS=Mus musculus OX=10090 GN=Mmab PE=1 SV=1                             | 1.25        |
| Tab2    | Q99K90 | TGF-beta-activated kinase 1 and MAP3K7-binding protein 2 OS=Mus musculus OX=10090 GN=Tab2 PE=1 SV=   | 0.733333333 |
| Maz     | P56671 | Myc-associated zinc finger protein OS=Mus musculus OX=10090 GN=Maz PE=1 SV=1                         | 0.98        |
| Mrps21  | P58059 | 28S ribosomal protein S21 mitochondrial OS=Mus musculus OX=10090 GN=Mrps21 PE=1 SV=1                 | 1.423333333 |
| Znf703  | P0CL69 | Zinc finger protein 703 OS=Mus musculus OX=10090 GN=Znf703 PE=1 SV=1                                 | 0.333333333 |
| Med6    | Q921D4 | Mediator of RNA polymerase II transcription subunit 6 OS=Mus musculus OX=10090 GN=Med6 PE=1 SV=      | 1.05        |
| Egln1   | Q91YE3 | Egln nine homolog 1 OS=Mus musculus OX=10090 GN=Egln1 PE=1 SV=2                                      | 1.426666667 |
| Ccdc167 | Q9D162 | Coiled-coil domain-containing protein 167 OS=Mus musculus OX=10090 GN=Ccdc167 PE=1 SV=2              | 0.526666667 |
| Tdrd7   | Q8K1H1 | Tudor domain-containing protein 7 OS=Mus musculus OX=10090 GN=Tdrd7 PE=1 SV=1                        | 2.385       |
| Itih4   | A6X935 | Inter alpha-trypsin inhibitor heavy chain 4 OS=Mus musculus OX=10090 GN=Itih4 PE=1 SV=2              | 0           |
| Cdkal1  | Q91WE6 | Threonylcarbamoyladenosine tRNA methyltransferase OS=Mus musculus OX=10090 GN=Cdkal1 PE=1 SV=        | 0.65        |
| Ccdc12  | Q8R344 | Coiled-coil domain-containing protein 12 OS=Mus musculus OX=10090 GN=Ccdc12 PE=1 SV=2                | 0.69        |

|          |        |                                                                                             |             |
|----------|--------|---------------------------------------------------------------------------------------------|-------------|
| Npr2     | Q6VWV5 | Atrial natriuretic peptide receptor 2 OS=Mus musculus OX=10090 GN=Npr2 PE=1 SV=2            | 1.633333333 |
| Wipi1    | Q8R3E3 | WD repeat domain phosphoinositide-interacting protein 1 OS=Mus musculus OX=10090 GN=Wipi1   | 0.833333333 |
| Haus1    | Q8BHX1 | HAUS augmin-like complex subunit 1 OS=Mus musculus OX=10090 GN=Haus1 PE=1 SV=2              |             |
| Mpc1     | P63030 | Mitochondrial pyruvate carrier 1 OS=Mus musculus OX=10090 GN=Mpc1 PE=1 SV=1                 | 1.245       |
| Kxd1     | Q80XH1 | KxDL motif-containing protein 1 OS=Mus musculus OX=10090 GN=Kxd1 PE=1 SV=1                  | 2.033333333 |
| Ndufb3   | Q9CQZ6 | NADH dehydrogenase [ubiquinone] 1 beta subcomplex subunit 3 OS=Mus musculus OX=10090 GN=    | 0.793333333 |
| Mphosph6 | Q9D1Q1 | M-phase phosphoprotein 6 OS=Mus musculus OX=10090 GN=Mphosph6 PE=1 SV=1                     | 0.953333333 |
| Hs6st2   | Q80UW0 | Heparan-sulfate 6-O-sulfotransferase 2 OS=Mus musculus OX=10090 GN=Hs6st2 PE=2 SV=3         | 1.225       |
| Pgpep1   | Q9ESW8 | Pyroglutamyl-peptidase 1 OS=Mus musculus OX=10090 GN=Pgpep1 PE=1 SV=1                       | 1.073333333 |
| Tmem259  | Q8CIV2 | Membralin OS=Mus musculus OX=10090 GN=Tmem259 PE=1 SV=2                                     | 0.633333333 |
| Thbd     | P15306 | Thrombomodulin OS=Mus musculus OX=10090 GN=Thbd PE=1 SV=1                                   | 0.98        |
| Uimc1    | Q5U5Q9 | BRCA1-A complex subunit RAP80 OS=Mus musculus OX=10090 GN=Uimc1 PE=1 SV=2                   | 1.88        |
| Usp30    | Q3UN04 | Ubiquitin carboxyl-terminal hydrolase 30 OS=Mus musculus OX=10090 GN=Usp30 PE=1 SV=1        | 0.645       |
| Phf2     | Q9WTU0 | Lysine-specific demethylase PHF2 OS=Mus musculus OX=10090 GN=Phf2 PE=1 SV=2                 | 1.02        |
| Creg1    | O88668 | Protein CREG1 OS=Mus musculus OX=10090 GN=Creg1 PE=1 SV=1                                   | 0.663333333 |
| Tmem167a | Q9CR64 | Protein kish-A OS=Mus musculus OX=10090 GN=Tmem167a PE=1 SV=1                               | 0.91        |
| Stambpl1 | Q76N33 | AMSH-like protease OS=Mus musculus OX=10090 GN=Stambpl1 PE=1 SV=1                           | 0.905       |
| Csf1     | P07141 | Macrophage colony-stimulating factor 1 OS=Mus musculus OX=10090 GN=Csf1 PE=1 SV=2           | 2.093333333 |
| Vhl      | P40338 | von Hippel-Lindau disease tumor suppressor OS=Mus musculus OX=10090 GN=Vhl PE=1 SV=1        | 2.346666667 |
| Timp2    | P25785 | Metalloproteinase inhibitor 2 OS=Mus musculus OX=10090 GN=Timp2 PE=1 SV=2                   | 0.606666667 |
| Sars2    | Q9JL8  | Serine--tRNA ligase mitochondrial OS=Mus musculus OX=10090 GN=Sars2 PE=1 SV=2               |             |
| L3mbtl3  | Q8BLB7 | Lethal(3)malignant brain tumor-like protein 3 OS=Mus musculus OX=10090 GN=L3mbtl3 PE=1 SV=1 | 0.525       |
| Ppp1r12c | Q3UMT1 | Protein phosphatase 1 regulatory subunit 12C OS=Mus musculus OX=10090 GN=Ppp1r12c PE=1 SV=  |             |
| Mef2c    | Q8CFN5 | Myocyte-specific enhancer factor 2C OS=Mus musculus OX=10090 GN=Mef2c PE=1 SV=2             | 9.64        |
| Mef2d    | Q63943 | Myocyte-specific enhancer factor 2D OS=Mus musculus OX=10090 GN=Mef2d PE=1 SV=2             | 9.64        |
| Mef2a    | Q60929 | Myocyte-specific enhancer factor 2A OS=Mus musculus OX=10090 GN=Mef2a PE=1 SV=2             | 9.64        |
| Ifi30    | Q9ESY9 | Gamma-interferon-inducible lysosomal thiol reductase OS=Mus musculus OX=10090 GN=Ifi30 PE=1 | 0.96        |
| Rhobtb3  | Q9CTN4 | Rho-related BTB domain-containing protein 3 OS=Mus musculus OX=10090 GN=Rhobtb3 PE=2 SV=    | 1.263333333 |
| Tmem126a | Q9D8Y1 | Transmembrane protein 126A OS=Mus musculus OX=10090 GN=Tmem126a PE=1 SV=1                   | 1.103333333 |
| Sgpp1    | Q9JI99 | Sphingosine-1-phosphate phosphatase 1 OS=Mus musculus OX=10090 GN=Sgpp1 PE=1 SV=1           | 0.973333333 |
| Rufy2    | Q8R4C2 | RUN and FYVE domain-containing protein 2 OS=Mus musculus OX=10090 GN=Rufy2 PE=1 SV=2        | 1.403333333 |
| Ptgfrn   | Q9WV91 | Prostaglandin F2 receptor negative regulator OS=Mus musculus OX=10090 GN=Ptgfrn PE=1 SV=2   |             |
| Fam168b  | Q80XQ8 | Myelin-associated neurite-outgrowth inhibitor OS=Mus musculus OX=10090 GN=Fam168b PE=1 SV=  | 0.55        |
| Crim1    | Q9JLL0 | Cysteine-rich motor neuron 1 protein OS=Mus musculus OX=10090 GN=Crim1 PE=2 SV=2            | 0.9         |

|          |        |                                                                                                                                |
|----------|--------|--------------------------------------------------------------------------------------------------------------------------------|
| Timmdc1  | Q8BUY5 | Complex I assembly factor TIMMDC1 mitochondrial OS=Mus musculus OX=10090 GN=Timmdc1 PE=1.096666667                             |
| Orc5     | Q9WUV0 | Origin recognition complex subunit 5 OS=Mus musculus OX=10090 GN=Orc5 PE=2 SV=1 1.495                                          |
| Hikeshi  | Q9DD02 | Protein Hikeshi OS=Mus musculus OX=10090 GN=Hikeshi PE=1 SV=1 0.953333333                                                      |
| Coq6     | Q8R1S0 | Ubiquinone biosynthesis monooxygenase COQ6 mitochondrial OS=Mus musculus OX=10090 GN=C 0.615                                   |
| Uqcrcq   | Q9CQ69 | Cytochrome b-c1 complex subunit 8 OS=Mus musculus OX=10090 GN=Uqcrcq PE=1 SV=3 0.466666667                                     |
| Tpgs1    | Q99MS8 | Tubulin polyglutamylase complex subunit 1 OS=Mus musculus OX=10090 GN=Tpgs1 PE=1 SV=1 1.08                                     |
| Rrp15    | Q9CYX7 | RRP15-like protein OS=Mus musculus OX=10090 GN=Rrp15 PE=1 SV=2 0.89                                                            |
| Rpp25l   | Q99JH1 | Ribonuclease P protein subunit p25-like protein OS=Mus musculus OX=10090 GN=Rpp25l PE=1 SV= 1.16                               |
| Chmp2b   | Q8BJF9 | Charged multivesicular body protein 2b OS=Mus musculus OX=10090 GN=Chmp2b PE=1 SV=1 1                                          |
| Gosr1    | O88630 | Golgi SNAP receptor complex member 1 OS=Mus musculus OX=10090 GN=Gosr1 PE=1 SV=2 0.716666667                                   |
| Pole2    | O54956 | DNA polymerase epsilon subunit 2 OS=Mus musculus OX=10090 GN=Pole2 PE=2 SV=2 0.485                                             |
|          | Q8VE95 | UPF0598 protein C8orf82 homolog OS=Mus musculus OX=10090 PE=1 SV=1                                                             |
| Pisd     | Q8BSF4 | Phosphatidylserine decarboxylase proenzyme mitochondrial OS=Mus musculus OX=10090 GN=Pisd 4.005                                |
| Dctn5    | Q9QZB9 | Dynactin subunit 5 OS=Mus musculus OX=10090 GN=Dctn5 PE=1 SV=1 0.916666667                                                     |
| Kyat3    | Q71RI9 | Kynurenine--oxoglutarate transaminase 3 OS=Mus musculus OX=10090 GN=Kyat3 PE=1 SV=1 0.736666667                                |
| Bloc1s1  | O55102 | Biogenesis of lysosome-related organelles complex 1 subunit 1 OS=Mus musculus OX=10090 GN=Blc 0.813333333                      |
| Mettl21A | Q9CQL0 | Protein N-lysine methyltransferase METTL21A OS=Mus musculus OX=10090 GN=Mettl21A PE=2 SV= 0.7                                  |
| Zbed3    | Q9D0L1 | Zinc finger BED domain-containing protein 3 OS=Mus musculus OX=10090 GN=Zbed3 PE=1 SV=1 8.436666667                            |
| Usp45    | Q8K387 | Ubiquitin carboxyl-terminal hydrolase 45 OS=Mus musculus OX=10090 GN=Usp45 PE=1 SV=1 1.086666667                               |
| Grpel2   | O88396 | GrpE protein homolog 2 mitochondrial OS=Mus musculus OX=10090 GN=Grpel2 PE=2 SV=2 1.053333333                                  |
| Tmbim6   | Q9D2C7 | Bax inhibitor 1 OS=Mus musculus OX=10090 GN=Tmbim6 PE=1 SV=1 25.42666667                                                       |
| Bcl10    | Q9Z0H7 | B-cell lymphoma/leukemia 10 OS=Mus musculus OX=10090 GN=Bcl10 PE=1 SV=1 0.956666667                                            |
| Clp1     | Q99LI9 | Polyribonucleotide 5'-hydroxyl-kinase Clp1 OS=Mus musculus OX=10090 GN=Clp1 PE=1 SV=1 2.025                                    |
| Sec11c   | Q9D8V7 | Signal peptidase complex catalytic subunit SEC11C OS=Mus musculus OX=10090 GN=Sec11c PE=1 S 0.826666667                        |
| Ndufs5   | Q99LY9 | NADH dehydrogenase [ubiquinone] iron-sulfur protein 5 OS=Mus musculus OX=10090 GN=Ndufs5 P 0.97                                |
| Mtnd4    | P03911 | NADH-ubiquinone oxidoreductase chain 4 OS=Mus musculus OX=10090 GN=Mtnd4 PE=1 SV=1 0.7                                         |
| Sap30    | O88574 | Histone deacetylase complex subunit SAP30 OS=Mus musculus OX=10090 GN=Sap30 PE=1 SV=1 0.735                                    |
| Mgat2    | Q921V5 | Alpha-1 6-mannosyl-glycoprotein 2-beta-N-acetylglucosaminyltransferase OS=Mus musculus OX=10090 GN=Mgat2 PE=1 SV=1 9.603333333 |
| Tti2     | Q8BGV4 | TELO2-interacting protein 2 OS=Mus musculus OX=10090 GN=Tti2 PE=2 SV=1 1.67                                                    |
| Slc6a8   | Q8VBW1 | Sodium- and chloride-dependent creatine transporter 1 OS=Mus musculus OX=10090 GN=Slc6a8 PI 2.07                               |
| Ptpn13   | Q64512 | Tyrosine-protein phosphatase non-receptor type 13 OS=Mus musculus OX=10090 GN=Ptpn13 PE=1                                      |
| Ell      | O08856 | RNA polymerase II elongation factor ELL OS=Mus musculus OX=10090 GN=Ell PE=2 SV=2 0.32                                         |
| Fdx1     | P46656 | Adrenodoxin mitochondrial OS=Mus musculus OX=10090 GN=Fdx1 PE=1 SV=1 0.876666667                                               |
| Lman2l   | P59481 | VIP36-like protein OS=Mus musculus OX=10090 GN=Lman2l PE=1 SV=1 0.293333333                                                    |

|          |        |                                                                                                |             |
|----------|--------|------------------------------------------------------------------------------------------------|-------------|
| Plpp3    | Q99JY8 | Phospholipid phosphatase 3 OS=Mus musculus OX=10090 GN=Plpp3 PE=1 SV=1                         | 1.1         |
| Nudt16l1 | Q8VHN8 | Tudor-interacting repair regulator protein OS=Mus musculus OX=10090 GN=Nudt16l1 PE=1 SV=2      | 0.58        |
| Cyth2    | P63034 | Cytohesin-2 OS=Mus musculus OX=10090 GN=Cyth2 PE=1 SV=2                                        | 0.485       |
| Mtr      | A6H5Y3 | Methionine synthase OS=Mus musculus OX=10090 GN=Mtr PE=1 SV=1                                  | 0.75        |
| Desi1    | Q9CQT7 | Desumoylating isopeptidase 1 OS=Mus musculus OX=10090 GN=Desi1 PE=1 SV=1                       | 1.02        |
| Sde2     | Q8K1J5 | Replication stress response regulator SDE2 OS=Mus musculus OX=10090 GN=Sde2 PE=1 SV=1          |             |
| Med20    | Q9R0X0 | Mediator of RNA polymerase II transcription subunit 20 OS=Mus musculus OX=10090 GN=Med20 P     | 1.456666667 |
| Kdm3a    | Q6PCM1 | Lysine-specific demethylase 3A OS=Mus musculus OX=10090 GN=Kdm3a PE=1 SV=1                     | 1.895       |
| Anapc16  | Q9CPV2 | Anaphase-promoting complex subunit 16 OS=Mus musculus OX=10090 GN=Anapc16 PE=3 SV=1            | 1.183333333 |
| Vps41    | Q5KU39 | Vacuolar protein sorting-associated protein 41 homolog OS=Mus musculus OX=10090 GN=Vps41 P     | 0.925       |
| Ankrd27  | Q3UMR0 | Ankyrin repeat domain-containing protein 27 OS=Mus musculus OX=10090 GN=Ankrd27 PE=1 SV=2      | 0.37        |
| Alg11    | Q3TZM9 | GDP-Man:Man(3)GlcNAc(2)-PP-Dol alpha-1 2-mannosyltransferase OS=Mus musculus OX=10090 GN       | 0.8         |
| Mkrn2    | Q9ERV1 | Probable E3 ubiquitin-protein ligase makorin-2 OS=Mus musculus OX=10090 GN=Mkrn2 PE=1 SV=2     | 7.795       |
| Aif1l    | Q9EQX4 | Allograft inflammatory factor 1-like OS=Mus musculus OX=10090 GN=Aif1l PE=1 SV=1               | 1.703333333 |
|          | Q8WURO | Protein C19orf12 homolog OS=Mus musculus OX=10090 PE=1 SV=1                                    | 0.625       |
| Bcl9l    | Q67FY2 | B-cell CLL/lymphoma 9-like protein OS=Mus musculus OX=10090 GN=Bcl9l PE=1 SV=1                 | 0.765       |
| Hmces    | Q8R1M0 | Abasic site processing protein HMCES OS=Mus musculus OX=10090 GN=Hmces PE=1 SV=1               | 1.07        |
| Retsat   | Q64FW2 | All-trans-retinol 13 14-reductase OS=Mus musculus OX=10090 GN=Retsat PE=1 SV=3                 | 0.896666667 |
| Rpl39    | P62892 | 60S ribosomal protein L39 OS=Mus musculus OX=10090 GN=Rpl39 PE=1 SV=2                          | 0.87        |
| Ralbp1   | Q62172 | RalA-binding protein 1 OS=Mus musculus OX=10090 GN=Ralbp1 PE=1 SV=4                            | 4.395       |
| Mrgbp    | Q9DAT2 | MRG/MORF4L-binding protein OS=Mus musculus OX=10090 GN=Mrgbp PE=1 SV=2                         | 1.236666667 |
| Gps2     | Q921N8 | G protein pathway suppressor 2 OS=Mus musculus OX=10090 GN=Gps2 PE=1 SV=1                      | 1.02        |
| Rdh14    | Q9ERI6 | Retinol dehydrogenase 14 OS=Mus musculus OX=10090 GN=Rdh14 PE=1 SV=1                           | 0.583333333 |
| Tor1a    | Q9ER39 | Torsin-1A OS=Mus musculus OX=10090 GN=Tor1a PE=1 SV=1                                          | 1.046666667 |
| Avl9     | Q80U56 | Late secretory pathway protein AVL9 homolog OS=Mus musculus OX=10090 GN=Avl9 PE=1 SV=2         | 1.43        |
|          | Q9D9H8 | UPF0565 protein C2orf69 homolog OS=Mus musculus OX=10090 PE=2 SV=3                             | 1.84        |
| Stx16    | Q8BVI5 | Syntaxin-16 OS=Mus musculus OX=10090 GN=Stx16 PE=1 SV=3                                        |             |
| Serpinf1 | P97298 | Pigment epithelium-derived factor OS=Mus musculus OX=10090 GN=Serpinf1 PE=1 SV=2               | 0.76        |
| Ppcs     | Q8VDG5 | Phosphopantothenate--cysteine ligase OS=Mus musculus OX=10090 GN=Ppcs PE=1 SV=1                | 0.45        |
| Taf8     | Q9EQH4 | Transcription initiation factor TFIID subunit 8 OS=Mus musculus OX=10090 GN=Taf8 PE=2 SV=1     | 1.31        |
| Med13l   | Q6JPI3 | Mediator of RNA polymerase II transcription subunit 13-like OS=Mus musculus OX=10090 GN=Med13l | 0.495       |
| Sirpa    | P97797 | Tyrosine-protein phosphatase non-receptor type substrate 1 OS=Mus musculus OX=10090 GN=Sirpa   | 6.21        |
| Ift140   | E9PY46 | Intraflagellar transport protein 140 homolog OS=Mus musculus OX=10090 GN=Ift140 PE=1 SV=1      | 0.56        |
| Fastkd5  | Q7TMV3 | FAST kinase domain-containing protein 5 mitochondrial OS=Mus musculus OX=10090 GN=Fastkd5      | 0.975       |



|          |        |                                                                                             |             |
|----------|--------|---------------------------------------------------------------------------------------------|-------------|
| Tbc1d2b  | Q3U0J8 | TBC1 domain family member 2B OS=Mus musculus OX=10090 GN=Tbc1d2b PE=1 SV=2                  | 0.855       |
| Ndufb6   | Q3UIU2 | NADH dehydrogenase [ubiquinone] 1 beta subcomplex subunit 6 OS=Mus musculus OX=10090 GN=    | 0.75        |
| Znf800   | Q0VEE6 | Zinc finger protein 800 OS=Mus musculus OX=10090 GN=Znf800 PE=1 SV=1                        | 0.73        |
| Mcub     | Q810S1 | Calcium uniporter regulatory subunit MCub mitochondrial OS=Mus musculus OX=10090 GN=Mcub    | 0.665       |
| Agpat3   | Q9D517 | 1-acyl-sn-glycerol-3-phosphate acyltransferase gamma OS=Mus musculus OX=10090 GN=Agpat3 PE= | 1.05        |
| Phlda3   | Q9WV95 | Pleckstrin homology-like domain family A member 3 OS=Mus musculus OX=10090 GN=Phlda3 PE=1   | 1.325       |
| Med30    | Q9CQI9 | Mediator of RNA polymerase II transcription subunit 30 OS=Mus musculus OX=10090 GN=Med30 P  | 1.156666667 |
| Elp5     | Q99L85 | Elongator complex protein 5 OS=Mus musculus OX=10090 GN=Elp5 PE=2 SV=1                      | 1.136666667 |
| Xkr5     | Q5GH66 | XK-related protein 5 OS=Mus musculus OX=10090 GN=Xkr5 PE=2 SV=1                             | 0.48        |
| Usp46    | P62069 | Ubiquitin carboxyl-terminal hydrolase 46 OS=Mus musculus OX=10090 GN=Usp46 PE=1 SV=1        | 0.87        |
| Mea1     | Q64327 | Male-enhanced antigen 1 OS=Mus musculus OX=10090 GN=Mea1 PE=1 SV=1                          | 1.44        |
| Aven     | Q9D9K3 | Cell death regulator Aven OS=Mus musculus OX=10090 GN=Aven PE=1 SV=2                        | 1.805       |
| Arglu1   | Q3UL36 | Arginine and glutamate-rich protein 1 OS=Mus musculus OX=10090 GN=Arglu1 PE=1 SV=2          | 0.885       |
| Ei24     | Q61070 | Etoposide-induced protein 2.4 OS=Mus musculus OX=10090 GN=Ei24 PE=1 SV=3                    | 1.225       |
| Hps5     | P59438 | Hermansky-Pudlak syndrome 5 protein homolog OS=Mus musculus OX=10090 GN=Hps5 PE=1 SV=2      |             |
| Tmem132a | Q922P8 | Transmembrane protein 132A OS=Mus musculus OX=10090 GN=Tmem132a PE=1 SV=2                   | 1.576666667 |
| Acy3     | Q91XE4 | N-acyl-aromatic-L-amino acid amidohydrolase (carboxylate-forming) OS=Mus musculus OX=10090  | 0.993333333 |
| Pot1     | Q91WC1 | Protection of telomeres protein 1 OS=Mus musculus OX=10090 GN=Pot1 PE=1 SV=1                | 0.84        |
| Syf2     | Q9D198 | Pre-mRNA-splicing factor SYF2 OS=Mus musculus OX=10090 GN=Syf2 PE=2 SV=1                    | 1.996666667 |
| Sccpdh   | Q8R127 | Saccharopine dehydrogenase-like oxidoreductase OS=Mus musculus OX=10090 GN=Sccpdh PE=1 SV=  |             |
| Crif1    | Q9JM58 | Cytokine receptor-like factor 1 OS=Mus musculus OX=10090 GN=Crif1 PE=1 SV=1                 | 2.333333333 |
| Nfe2l2   | Q60795 | Nuclear factor erythroid 2-related factor 2 OS=Mus musculus OX=10090 GN=Nfe2l2 PE=1 SV=2    | 0.066666667 |
| Scrn1    | Q9CZC8 | Secernin-1 OS=Mus musculus OX=10090 GN=Scrn1 PE=1 SV=1                                      | 0.766666667 |
| Comtd1   | Q8BIG7 | Catechol O-methyltransferase domain-containing protein 1 OS=Mus musculus OX=10090 GN=Comt   | 1.45        |
| Pdpx     | P60487 | Pyridoxal phosphate phosphatase OS=Mus musculus OX=10090 GN=Pdpx PE=1 SV=1                  | 0.845       |
| Kat8     | Q9D1P2 | Histone acetyltransferase KAT8 OS=Mus musculus OX=10090 GN=Kat8 PE=1 SV=1                   |             |
| Lrrc8d   | Q8BGR2 | Volume-regulated anion channel subunit LRRC8D OS=Mus musculus OX=10090 GN=Lrrc8d PE=1 SV=   | 0.655       |
| Fam133b  | Q9CVI2 | Protein FAM133B OS=Mus musculus OX=10090 GN=Fam133b PE=1 SV=3                               | 0.46        |
| Gorab    | Q8BRM2 | RAB6-interacting golgin OS=Mus musculus OX=10090 GN=Gorab PE=1 SV=1                         | 1.135       |
| Pax7     | P47239 | Paired box protein Pax-7 OS=Mus musculus OX=10090 GN=Pax7 PE=1 SV=2                         | 4.106666667 |
| Cep89    | Q9CZX2 | Centrosomal protein of 89 kDa OS=Mus musculus OX=10090 GN=Cep89 PE=1 SV=1                   |             |
| Atxn1    | P54254 | Ataxin-1 OS=Mus musculus OX=10090 GN=Atxn1 PE=1 SV=2                                        | 1.286666667 |
| Veph1    | A1A535 | Ventricular zone-expressed PH domain-containing protein 1 OS=Mus musculus OX=10090 GN=Veph  | 128.975     |
| Eif1a    | Q60872 | Eukaryotic translation initiation factor 1A OS=Mus musculus OX=10090 GN=Eif1a PE=2 SV=3     | 0.923333333 |

|          |        |                                                                                             |             |
|----------|--------|---------------------------------------------------------------------------------------------|-------------|
| Nfib     | P97863 | Nuclear factor 1 B-type OS=Mus musculus OX=10090 GN=Nfib PE=1 SV=2                          |             |
| Ptp4a2   | O70274 | Protein tyrosine phosphatase type IVA 2 OS=Mus musculus OX=10090 GN=Ptp4a2 PE=1 SV=1        |             |
| Dock6    | Q8VDR9 | Dedicator of cytokinesis protein 6 OS=Mus musculus OX=10090 GN=Dock6 PE=1 SV=4              |             |
| Tfcp2    | Q9ERA0 | Alpha-globin transcription factor CP2 OS=Mus musculus OX=10090 GN=Tfcp2 PE=1 SV=1           |             |
| Sbno2    | Q7TNB8 | Protein strawberry notch homolog 2 OS=Mus musculus OX=10090 GN=Sbno2 PE=1 SV=1              |             |
| Zfx      | P17012 | Zinc finger X-chromosomal protein OS=Mus musculus OX=10090 GN=Zfx PE=1 SV=2                 |             |
| Krt1     | P04104 | Keratin type II cytoskeletal 1 OS=Mus musculus OX=10090 GN=Krt1 PE=1 SV=4                   | 1.373333333 |
| Pank1    | Q8K4K6 | Pantothenate kinase 1 OS=Mus musculus OX=10090 GN=Pank1 PE=1 SV=1                           | 0.94        |
| Ptp4a1   | Q63739 | Protein tyrosine phosphatase type IVA 1 OS=Mus musculus OX=10090 GN=Ptp4a1 PE=1 SV=1        | 2.26        |
| Prkcg    | P63318 | Protein kinase C gamma type OS=Mus musculus OX=10090 GN=Prkcg PE=1 SV=1                     | 11.675      |
| Mink1    | Q9JM52 | Misshapen-like kinase 1 OS=Mus musculus OX=10090 GN=Mink1 PE=1 SV=3                         |             |
| Osbp2    | Q5QNQ6 | Oxysterol-binding protein 2 OS=Mus musculus OX=10090 GN=Osbp2 PE=1 SV=1                     | 21.41       |
| Wnk3     | Q80XP9 | Serine/threonine-protein kinase WNK3 OS=Mus musculus OX=10090 GN=Wnk3 PE=1 SV=3             | 0.195       |
| Zfp36l1  | P23950 | mRNA decay activator protein ZFP36L1 OS=Mus musculus OX=10090 GN=Zfp36l1 PE=1 SV=1          | 0.63        |
| Ank2     | Q8C8R3 | Ankyrin-2 OS=Mus musculus OX=10090 GN=Ank2 PE=1 SV=2                                        |             |
| Chd6     | A3KFM7 | Chromodomain-helicase-DNA-binding protein 6 OS=Mus musculus OX=10090 GN=Chd6 PE=1 SV=1      | 0.845       |
| Utp14b   | Q6EJB6 | U3 small nucleolar RNA-associated protein 14 homolog B OS=Mus musculus OX=10090 GN=Utp14b   |             |
| Mapk8ip3 | Q9ESN9 | C-Jun-amino-terminal kinase-interacting protein 3 OS=Mus musculus OX=10090 GN=Mapk8ip3 PE=  |             |
| Zfp2     | P08043 | Zinc finger protein 2 OS=Mus musculus OX=10090 GN=Zfp2 PE=2 SV=2                            | 0.916666667 |
| Rab13    | Q9DD03 | Ras-related protein Rab-13 OS=Mus musculus OX=10090 GN=Rab13 PE=1 SV=1                      | 6.28        |
| Epha3    | P29319 | Ephrin type-A receptor 3 OS=Mus musculus OX=10090 GN=Epha3 PE=1 SV=1                        |             |
| Papolg   | Q6PCL9 | Poly(A) polymerase gamma OS=Mus musculus OX=10090 GN=Papolg PE=1 SV=1                       | 2.17        |
| Chd7     | A2AJK6 | Chromodomain-helicase-DNA-binding protein 7 OS=Mus musculus OX=10090 GN=Chd7 PE=1 SV=1      |             |
| Clgn     | P52194 | Calmegin OS=Mus musculus OX=10090 GN=Clgn PE=1 SV=2                                         | 0.97        |
| Cul9     | Q80TT8 | Cullin-9 OS=Mus musculus OX=10090 GN=Cul9 PE=1 SV=2                                         | 1.08        |
| Capns2   | Q9D7J7 | Calpain small subunit 2 OS=Mus musculus OX=10090 GN=Capns2 PE=2 SV=1                        |             |
| Spag17   | Q5S003 | Sperm-associated antigen 17 OS=Mus musculus OX=10090 GN=Spag17 PE=1 SV=2                    | 0.003333333 |
| Stk10    | O55098 | Serine/threonine-protein kinase 10 OS=Mus musculus OX=10090 GN=Stk10 PE=1 SV=2              |             |
| Pde4d    | Q01063 | cAMP-specific 3' 5'-cyclic phosphodiesterase 4D OS=Mus musculus OX=10090 GN=Pde4d PE=1 SV=2 | 0.57        |
| Syne1    | Q6ZWR6 | Nesprin-1 OS=Mus musculus OX=10090 GN=Syne1 PE=1 SV=2                                       | 3.483333333 |
| Txnrd2   | Q9JLT4 | Thioredoxin reductase 2 mitochondrial OS=Mus musculus OX=10090 GN=Txnrd2 PE=1 SV=4          | 0.463333333 |
| Ube2d3   | P61079 | Ubiquitin-conjugating enzyme E2 D3 OS=Mus musculus OX=10090 GN=Ube2d3 PE=1 SV=1             | 1.25        |
| Ube2d2   | P62838 | Ubiquitin-conjugating enzyme E2 D2 OS=Mus musculus OX=10090 GN=Ube2d2 PE=1 SV=1             | 1.25        |
| Dtl      | Q3TLR7 | Denticleless protein homolog OS=Mus musculus OX=10090 GN=Dtl PE=1 SV=2                      | 2.54        |

|           |        |                                                                                                |             |
|-----------|--------|------------------------------------------------------------------------------------------------|-------------|
| Serpinb1a | Q9D154 | Leukocyte elastase inhibitor A OS=Mus musculus OX=10090 GN=Serpinb1a PE=1 SV=1                 | 0.43        |
| Epn1      | Q80VP1 | Epsin-1 OS=Mus musculus OX=10090 GN=Epn1 PE=1 SV=3                                             | 0.883333333 |
| Atp6v0a2  | P15920 | V-type proton ATPase 116 kDa subunit a2 OS=Mus musculus OX=10090 GN=Atp6v0a2 PE=1 SV=2         | 0.746666667 |
| Kdelr2    | Q9CQM2 | ER lumen protein-retaining receptor 2 OS=Mus musculus OX=10090 GN=Kdelr2 PE=1 SV=1             | 0.87        |
| Sipa1l2   | Q80TE4 | Signal-induced proliferation-associated 1-like protein 2 OS=Mus musculus OX=10090 GN=Sipa1l2 P | 0.925       |
| Runx2     | Q08775 | Runt-related transcription factor 2 OS=Mus musculus OX=10090 GN=Runx2 PE=1 SV=2                | 0.973333333 |
| Nab1      | Q61122 | NGFI-A-binding protein 1 OS=Mus musculus OX=10090 GN=Nab1 PE=1 SV=2                            | 0.83        |
| Phc2      | Q9QWH1 | Polyhomeotic-like protein 2 OS=Mus musculus OX=10090 GN=Phc2 PE=1 SV=1                         | 0.95        |
| Dhrs7     | Q9CXR1 | Dehydrogenase/reductase SDR family member 7 OS=Mus musculus OX=10090 GN=Dhrs7 PE=1 SV=2        | 0.846666667 |
| Cc2d1b    | Q8BRN9 | Coiled-coil and C2 domain-containing protein 1B OS=Mus musculus OX=10090 GN=Cc2d1b PE=1 SV     |             |
| Rcctb1    | Q6NXM2 | RCC1 and BTB domain-containing protein 1 OS=Mus musculus OX=10090 GN=Rcctb1 PE=1 SV=1          | 5.57        |
| Creb1     | Q01147 | Cyclic AMP-responsive element-binding protein 1 OS=Mus musculus OX=10090 GN=Creb1 PE=1 SV=     | 0.85        |
| Numb      | Q9QZS3 | Protein numb homolog OS=Mus musculus OX=10090 GN=Numb PE=1 SV=1                                | 0.736666667 |
| Med25     | Q8VCB2 | Mediator of RNA polymerase II transcription subunit 25 OS=Mus musculus OX=10090 GN=Med25 P     | 1.163333333 |
| Tsc22d1   | P62500 | TSC22 domain family protein 1 OS=Mus musculus OX=10090 GN=Tsc22d1 PE=1 SV=2                    | 2.003333333 |
| Cdc34     | Q8CFI2 | Ubiquitin-conjugating enzyme E2 R1 OS=Mus musculus OX=10090 GN=Cdc34 PE=1 SV=1                 | 2.233333333 |
| Foxp4     | Q9DBY0 | Forkhead box protein P4 OS=Mus musculus OX=10090 GN=Foxp4 PE=1 SV=1                            | 2.305       |
| Map1lc3b  | Q9CQV6 | Microtubule-associated proteins 1A/1B light chain 3B OS=Mus musculus OX=10090 GN=Map1lc3b      | 1.556666667 |
| Mrtfb     | P59759 | Myocardin-related transcription factor B OS=Mus musculus OX=10090 GN=Mrtfb PE=1 SV=1           | 0.65        |
| Mtmr1     | Q9Z2C4 | Myotubularin-related protein 1 OS=Mus musculus OX=10090 GN=Mtmr1 PE=1 SV=1                     | 1.225       |
| Hbb-b2    | P02089 | Hemoglobin subunit beta-2 OS=Mus musculus OX=10090 GN=Hbb-b2 PE=1 SV=2                         | 0.076666667 |
| Hbb-b1    | P02088 | Hemoglobin subunit beta-1 OS=Mus musculus OX=10090 GN=Hbb-b1 PE=1 SV=2                         | 0.076666667 |
| Ube2a     | Q9Z255 | Ubiquitin-conjugating enzyme E2 A OS=Mus musculus OX=10090 GN=Ube2a PE=1 SV=1                  | 0.9         |
| Kif14     | L0N7N1 | Kinesin-like protein KIF14 OS=Mus musculus OX=10090 GN=Kif14 PE=1 SV=1                         | 0.975       |
| Mug1      | P28665 | Murinoglobulin-1 OS=Mus musculus OX=10090 GN=Mug1 PE=1 SV=3                                    | 0.196666667 |
| Wwp2      | Q9DBH0 | NEDD4-like E3 ubiquitin-protein ligase WWP2 OS=Mus musculus OX=10090 GN=Wwp2 PE=1 SV=1         | 1.345       |
| Ssbp2     | Q9CYZ8 | Single-stranded DNA-binding protein 2 OS=Mus musculus OX=10090 GN=Ssbp2 PE=1 SV=1              | 0.82        |
| Fam76a    | Q922G2 | Protein FAM76A OS=Mus musculus OX=10090 GN=Fam76a PE=2 SV=1                                    | 1.226666667 |
| Col2a1    | P28481 | Collagen alpha-1(II) chain OS=Mus musculus OX=10090 GN=Col2a1 PE=1 SV=2                        | 32.895      |
| Krt2      | Q3TTY5 | Keratin type II cytoskeletal 2 epidermal OS=Mus musculus OX=10090 GN=Krt2 PE=1 SV=1            | 1.27        |
| Exog      | Q8C163 | Nuclease EXOG mitochondrial OS=Mus musculus OX=10090 GN=Exog PE=1 SV=1                         |             |
| Evi5      | P97366 | Ecotropic viral integration site 5 protein OS=Mus musculus OX=10090 GN=Evi5 PE=1 SV=2          | 0.95        |
| Kmt2d     | Q6PDK2 | Histone-lysine N-methyltransferase 2D OS=Mus musculus OX=10090 GN=Kmt2d PE=1 SV=2              |             |
| Gga3      | Q8BMI3 | ADP-ribosylation factor-binding protein GGA3 OS=Mus musculus OX=10090 GN=Gga3 PE=1 SV=2        | 0.715       |

|          |        |                                                                                                               |             |
|----------|--------|---------------------------------------------------------------------------------------------------------------|-------------|
| Dmd      | P11531 | Dystrophin OS=Mus musculus OX=10090 GN=Dmd PE=1 SV=3                                                          | 0.993333333 |
| Chchd2   | Q9D1L0 | Coiled-coil-helix-coiled-coil-helix domain-containing protein 2 OS=Mus musculus OX=10090 GN=Chchd2 PE=1 SV=1  | 0.886666667 |
| Jpt1     | P97825 | Jupiter microtubule associated homolog 1 OS=Mus musculus OX=10090 GN=Jpt1 PE=1 SV=3                           | 0.813333333 |
| Cd81     | P35762 | CD81 antigen OS=Mus musculus OX=10090 GN=Cd81 PE=1 SV=2                                                       | 0.82        |
| Pip5k1a  | P70182 | Phosphatidylinositol 4-phosphate 5-kinase type-1 alpha OS=Mus musculus OX=10090 GN=Pip5k1a PE=1 SV=1          | 1.01        |
| Ecd      | Q9CS74 | Protein ecdysoneless homolog OS=Mus musculus OX=10090 GN=Ecd PE=1 SV=2                                        | 0.653333333 |
| Gfm2     | Q8R2Q4 | Ribosome-releasing factor 2 mitochondrial OS=Mus musculus OX=10090 GN=Gfm2 PE=1 SV=2                          | 0.81        |
| Degs1    | O09005 | Sphingolipid delta(4)-desaturase DES1 OS=Mus musculus OX=10090 GN=Degs1 PE=1 SV=1                             | 0.946666667 |
| Uxs1     | Q91XL3 | UDP-glucuronic acid decarboxylase 1 OS=Mus musculus OX=10090 GN=Uxs1 PE=1 SV=1                                | 0.88        |
| Pbx1     | P41778 | Pre-B-cell leukemia transcription factor 1 OS=Mus musculus OX=10090 GN=Pbx1 PE=1 SV=2                         | 1.006666667 |
| Rpl22    | P67984 | 60S ribosomal protein L22 OS=Mus musculus OX=10090 GN=Rpl22 PE=1 SV=2                                         | 0.896666667 |
| Bub1     | O08901 | Mitotic checkpoint serine/threonine-protein kinase BUB1 OS=Mus musculus OX=10090 GN=Bub1 PE=1 SV=1            | 0.843333333 |
| Cks1b    | P61025 | Cyclin-dependent kinases regulatory subunit 1 OS=Mus musculus OX=10090 GN=Cks1b PE=3 SV=1                     | 0.9         |
| Chtop    | Q9CY57 | Chromatin target of PRMT1 protein OS=Mus musculus OX=10090 GN=Chtop PE=1 SV=2                                 | 0.86        |
| Atg2b    | Q80XK6 | Autophagy-related protein 2 homolog B OS=Mus musculus OX=10090 GN=Atg2b PE=1 SV=3                             | 0.723333333 |
| Ift22    | Q9DAI2 | Intraflagellar transport protein 22 homolog OS=Mus musculus OX=10090 GN=Ift22 PE=1 SV=1                       | 0.843333333 |
| Arid5b   | Q8BM75 | AT-rich interactive domain-containing protein 5B OS=Mus musculus OX=10090 GN=Arid5b PE=1 SV=1                 | 0.663333333 |
| Ppp1r11  | Q8K1L5 | E3 ubiquitin-protein ligase PPP1R11 OS=Mus musculus OX=10090 GN=Ppp1r11 PE=1 SV=1                             | 0.9         |
| Gpatch4  | Q3TFK5 | G patch domain-containing protein 4 OS=Mus musculus OX=10090 GN=Gpatch4 PE=1 SV=1                             | 0.856666667 |
| Hypk     | Q9CR41 | Huntingtin-interacting protein K OS=Mus musculus OX=10090 GN=Hypk PE=1 SV=2                                   | 0.833333333 |
| Coq5     | Q9CXI0 | 2-methoxy-6-polyprenyl-1 4-benzoquinol methylase mitochondrial OS=Mus musculus OX=10090 GN=Coq5 PE=1 SV=1     | 0.946666667 |
| Ergic2   | Q9CR89 | Endoplasmic reticulum-Golgi intermediate compartment protein 2 OS=Mus musculus OX=10090 GN=Ergic2 PE=1 SV=1   | 0.92        |
| Fbxo38   | Q8BMI0 | F-box only protein 38 OS=Mus musculus OX=10090 GN=Fbxo38 PE=1 SV=1                                            | 0.783333333 |
| Commd8   | Q9CZG3 | COMM domain-containing protein 8 OS=Mus musculus OX=10090 GN=Commd8 PE=1 SV=1                                 | 0.586666667 |
| Dbi      | P31786 | Acyl-CoA-binding protein OS=Mus musculus OX=10090 GN=Dbi PE=1 SV=2                                            | 0.856666667 |
| Smg8     | Q8VE18 | Protein SMG8 OS=Mus musculus OX=10090 GN=Smg8 PE=1 SV=1                                                       | 1.843333333 |
| Ddrgrk1  | Q80WW9 | DDRGRK domain-containing protein 1 OS=Mus musculus OX=10090 GN=Ddrgrk1 PE=1 SV=2                              | 0.72        |
| Yipf5    | Q9EEQ2 | Protein YIPF5 OS=Mus musculus OX=10090 GN=Yipf5 PE=1 SV=1                                                     | 0.94        |
| Hsbp1    | Q9CQZ1 | Heat shock factor-binding protein 1 OS=Mus musculus OX=10090 GN=Hsbp1 PE=1 SV=1                               | 0.826666667 |
| Rbx1     | P62878 | E3 ubiquitin-protein ligase RBX1 OS=Mus musculus OX=10090 GN=Rbx1 PE=1 SV=1                                   | 0.96        |
| Slc7a6os | Q7TPE5 | Probable RNA polymerase II nuclear localization protein SLC7A6 OS=Mus musculus OX=10090 GN=Slc7a6os PE=1 SV=1 | 0.913333333 |
| Arsa     | P50428 | Arylsulfatase A OS=Mus musculus OX=10090 GN=Arsa PE=1 SV=2                                                    | 0.856666667 |
| Gstt3    | Q99L20 | Glutathione S-transferase theta-3 OS=Mus musculus OX=10090 GN=Gstt3 PE=1 SV=1                                 | 1.286666667 |
| Brd7     | O88665 | Bromodomain-containing protein 7 OS=Mus musculus OX=10090 GN=Brd7 PE=1 SV=1                                   | 0.785       |

|         |        |                                                                                              |             |
|---------|--------|----------------------------------------------------------------------------------------------|-------------|
| Ankmy2  | Q3TPE9 | Ankyrin repeat and MYND domain-containing protein 2 OS=Mus musculus OX=10090 GN=Ankmy2 F     | 0.826666667 |
| Txn2    | P97493 | Thioredoxin mitochondrial OS=Mus musculus OX=10090 GN=Txn2 PE=1 SV=1                         | 0.873333333 |
| Dhrs7b  | Q99J47 | Dehydrogenase/reductase SDR family member 7B OS=Mus musculus OX=10090 GN=Dhrs7b PE=1 SV=1    | 1.156666667 |
| Il1rn   | P25085 | Interleukin-1 receptor antagonist protein OS=Mus musculus OX=10090 GN=Il1rn PE=2 SV=1        | 0.81        |
| Zeb1    | Q64318 | Zinc finger E-box-binding homeobox 1 OS=Mus musculus OX=10090 GN=Zeb1 PE=1 SV=1              | 0.716666667 |
| Sf3b5   | Q923D4 | Splicing factor 3B subunit 5 OS=Mus musculus OX=10090 GN=Sf3b5 PE=1 SV=1                     | 0.72        |
| Mcf2    | Q8K5B2 | Multiple coagulation factor deficiency protein 2 homolog OS=Mus musculus OX=10090 GN=Mcf2    | 1.016666667 |
| Mmp2    | P33434 | 72 kDa type IV collagenase OS=Mus musculus OX=10090 GN=Mmp2 PE=1 SV=1                        | 1.206666667 |
| Gcsh    | Q91WK5 | Glycine cleavage system H protein mitochondrial OS=Mus musculus OX=10090 GN=Gcsh PE=1 SV=2   | 0.966666667 |
| Dpy30   | Q99LT0 | Protein dpy-30 homolog OS=Mus musculus OX=10090 GN=Dpy30 PE=1 SV=1                           | 0.88        |
| Sumf1   | Q8R0F3 | Formylglycine-generating enzyme OS=Mus musculus OX=10090 GN=Sumf1 PE=1 SV=2                  | 0.64        |
| Mrpl1   | Q99N96 | 39S ribosomal protein L1 mitochondrial OS=Mus musculus OX=10090 GN=Mrpl1 PE=1 SV=2           | 0.85        |
| Kcmf1   | Q80UY2 | E3 ubiquitin-protein ligase KCMF1 OS=Mus musculus OX=10090 GN=Kcmf1 PE=1 SV=1                | 0.89        |
| Ghitm   | Q91VC9 | Growth hormone-inducible transmembrane protein OS=Mus musculus OX=10090 GN=Ghitm PE=1        | 0.77        |
| Lgmn    | O89017 | Legumain OS=Mus musculus OX=10090 GN=Lgmn PE=1 SV=1                                          | 0.836666667 |
| Naa40   | Q8VE10 | N-alpha-acetyltransferase 40 OS=Mus musculus OX=10090 GN=Naa40 PE=1 SV=1                     | 0.77        |
| Mocs3   | A2BDX3 | Adenylyltransferase and sulfurtransferase MOCS3 OS=Mus musculus OX=10090 GN=Mocs3 PE=1 SV=   | 0.873333333 |
| Nradd   | Q8CJ26 | Death domain-containing membrane protein NRADD OS=Mus musculus OX=10090 GN=Nradd PE=1        | 0.933333333 |
| Gnl3l   | Q6PGG6 | Guanine nucleotide-binding protein-like 3-like protein OS=Mus musculus OX=10090 GN=Gnl3l PE= | 0.926666667 |
| Tpmt    | O55060 | Thiopurine S-methyltransferase OS=Mus musculus OX=10090 GN=Tpmt PE=1 SV=1                    | 1.323333333 |
| Tbc1d9b | Q5SVR0 | TBC1 domain family member 9B OS=Mus musculus OX=10090 GN=Tbc1d9b PE=1 SV=1                   | 1.296666667 |
| Taf10   | Q8K0H5 | Transcription initiation factor TFIID subunit 10 OS=Mus musculus OX=10090 GN=Taf10 PE=1 SV=1 | 0.913333333 |
| Bid     | P70444 | BH3-interacting domain death agonist OS=Mus musculus OX=10090 GN=Bid PE=1 SV=2               | 0.98        |
| Vamp3   | P63024 | Vesicle-associated membrane protein 3 OS=Mus musculus OX=10090 GN=Vamp3 PE=1 SV=1            | 0.903333333 |
| Rad18   | Q9QXK2 | E3 ubiquitin-protein ligase RAD18 OS=Mus musculus OX=10090 GN=Rad18 PE=1 SV=2                | 0.656666667 |
|         | Q9D7E4 | UPF0449 protein C19orf25 homolog OS=Mus musculus OX=10090 PE=1 SV=1                          | 0.816666667 |
| Rtn3    | Q9ES97 | Reticulon-3 OS=Mus musculus OX=10090 GN=Rtn3 PE=1 SV=2                                       | 0.933333333 |
| Osmr    | O70458 | Oncostatin-M-specific receptor subunit beta OS=Mus musculus OX=10090 GN=Osmr PE=1 SV=1       | 0.465       |
| Mrps16  | Q9CPX7 | 28S ribosomal protein S16 mitochondrial OS=Mus musculus OX=10090 GN=Mrps16 PE=1 SV=1         | 0.946666667 |
| Enpp3   | Q6DYE8 | Ectonucleotide pyrophosphatase/phosphodiesterase family member 3 OS=Mus musculus OX=10090    | 1.106666667 |
| Ldah    | Q8BVA5 | Lipid droplet-associated hydrolase OS=Mus musculus OX=10090 GN=Ldah PE=1 SV=1                | 0.92        |
| Ypel5   | P62700 | Protein yippee-like 5 OS=Mus musculus OX=10090 GN=Ypel5 PE=1 SV=1                            | 1.436666667 |
| Coa7    | Q921H9 | Cytochrome c oxidase assembly factor 7 OS=Mus musculus OX=10090 GN=Coa7 PE=1 SV=1            | 0.843333333 |
| Bcs1l   | Q9CZP5 | Mitochondrial chaperone BCS1 OS=Mus musculus OX=10090 GN=Bcs1l PE=1 SV=1                     | 0.96        |



|          |        |                                                                                                 |             |
|----------|--------|-------------------------------------------------------------------------------------------------|-------------|
| Slc38a2  | Q8CFE6 | Sodium-coupled neutral amino acid transporter 2 OS=Mus musculus OX=10090 GN=Slc38a2 PE=1 SV=1   | 0.976666667 |
| Mmgt1    | Q8K273 | Membrane magnesium transporter 1 OS=Mus musculus OX=10090 GN=Mmgt1 PE=1 SV=1                    | 0.93        |
| Fbxo3    | Q9DC63 | F-box only protein 3 OS=Mus musculus OX=10090 GN=Fbxo3 PE=1 SV=1                                | 0.903333333 |
| Eif4ebp2 | P70445 | Eukaryotic translation initiation factor 4E-binding protein 2 OS=Mus musculus OX=10090 GN=Eif4e | 0.633333333 |
| Stx17    | Q9D0I4 | Syntaxin-17 OS=Mus musculus OX=10090 GN=Stx17 PE=1 SV=1                                         | 0.633333333 |
| Sypl1    | O09117 | Synaptophysin-like protein 1 OS=Mus musculus OX=10090 GN=Sypl1 PE=1 SV=2                        | 0.926666667 |
| Mrpl27   | Q99N92 | 39S ribosomal protein L27 mitochondrial OS=Mus musculus OX=10090 GN=Mrpl27 PE=1 SV=1            | 0.886666667 |
| Micu1    | Q8VCX5 | Calcium uptake protein 1 mitochondrial OS=Mus musculus OX=10090 GN=Micu1 PE=1 SV=1              | 1.12        |
| Mpp7     | Q8BVD5 | MAGUK p55 subfamily member 7 OS=Mus musculus OX=10090 GN=Mpp7 PE=1 SV=2                         | 1.016666667 |
| Rpl22l1  | Q9D7S7 | 60S ribosomal protein L22-like 1 OS=Mus musculus OX=10090 GN=Rpl22l1 PE=1 SV=1                  | 0.913333333 |
| Wbp4     | Q61048 | WW domain-binding protein 4 OS=Mus musculus OX=10090 GN=Wbp4 PE=1 SV=4                          | 0.776666667 |
| Abcb7    | Q61102 | ATP-binding cassette sub-family B member 7 mitochondrial OS=Mus musculus OX=10090 GN=Abcb       | 0.89        |
| Npc2     | Q9Z0J0 | NPC intracellular cholesterol transporter 2 OS=Mus musculus OX=10090 GN=Npc2 PE=1 SV=1          | 0.786666667 |
| Maea     | Q4VC33 | E3 ubiquitin-protein transferase MAEA OS=Mus musculus OX=10090 GN=Maea PE=1 SV=1                | 1.36        |
| Fblim1   | Q71FD7 | Filamin-binding LIM protein 1 OS=Mus musculus OX=10090 GN=Fblim1 PE=1 SV=2                      | 0.976666667 |
| Pyroxd1  | Q3TMV7 | Pyridine nucleotide-disulfide oxidoreductase domain-containing protein 1 OS=Mus musculus OX=1   | 0.913333333 |
| Isy1     | Q69ZQ2 | Pre-mRNA-splicing factor ISY1 homolog OS=Mus musculus OX=10090 GN=Isy1 PE=1 SV=2                | 0.79        |
| Gpn3     | Q9D3W4 | GPN-loop GTPase 3 OS=Mus musculus OX=10090 GN=Gpn3 PE=2 SV=1                                    | 0.963333333 |
| Peg10    | Q7TN75 | Retrotransposon-derived protein PEG10 OS=Mus musculus OX=10090 GN=Peg10 PE=1 SV=2               | 0.856666667 |
| Sap30bp  | Q02614 | SAP30-binding protein OS=Mus musculus OX=10090 GN=Sap30bp PE=1 SV=2                             | 0.826666667 |
| Atp6ap1  | Q9R1Q9 | V-type proton ATPase subunit S1 OS=Mus musculus OX=10090 GN=Atp6ap1 PE=1 SV=1                   | 0.883333333 |
| Mgst3    | Q9CPU4 | Microsomal glutathione S-transferase 3 OS=Mus musculus OX=10090 GN=Mgst3 PE=1 SV=1              | 1.09        |
| Sco2     | Q8VCL2 | Protein SCO2 homolog mitochondrial OS=Mus musculus OX=10090 GN=Sco2 PE=1 SV=1                   | 0.88        |
| Gripap1  | Q8VD04 | GRIP1-associated protein 1 OS=Mus musculus OX=10090 GN=Gripap1 PE=1 SV=1                        | 0.755       |
| Bud23    | Q9CY21 | Probable 18S rRNA (guanine-N(7))-methyltransferase OS=Mus musculus OX=10090 GN=Bud23 PE=1       | 0.866666667 |
| Rsrc2    | A2RTL5 | Arginine/serine-rich coiled-coil protein 2 OS=Mus musculus OX=10090 GN=Rsrc2 PE=2 SV=1          | 0.86        |
| Ttc9c    | Q810A3 | Tetratricopeptide repeat protein 9C OS=Mus musculus OX=10090 GN=Ttc9c PE=1 SV=1                 | 0.97        |
| Dctn3    | Q9Z0Y1 | Dynactin subunit 3 OS=Mus musculus OX=10090 GN=Dctn3 PE=1 SV=2                                  | 0.776666667 |
| Lrch2    | Q3UMG5 | Leucine-rich repeat and calponin homology domain-containing protein 2 OS=Mus musculus OX=10     | 0.745       |
| Rmc1     | Q8VC42 | Regulator of MON1-CCZ1 complex OS=Mus musculus OX=10090 GN=Rmc1 PE=2 SV=1                       | 0.97        |
| Bri3bp   | Q8BXV2 | BRI3-binding protein OS=Mus musculus OX=10090 GN=Bri3bp PE=1 SV=1                               | 0.863333333 |
| Mrpl22   | Q8BU88 | 39S ribosomal protein L22 mitochondrial OS=Mus musculus OX=10090 GN=Mrpl22 PE=1 SV=1            | 0.7         |
| Gbe1     | Q9D6Y9 | 1,4-alpha-glucan-branching enzyme OS=Mus musculus OX=10090 GN=Gbe1 PE=1 SV=1                    | 0.823333333 |
| Chid1    | Q922Q9 | Chitinase domain-containing protein 1 OS=Mus musculus OX=10090 GN=Chid1 PE=1 SV=1               | 1.393333333 |

|          |        |                                                                                                                  |             |
|----------|--------|------------------------------------------------------------------------------------------------------------------|-------------|
| Gemin6   | Q9CX53 | Gem-associated protein 6 OS=Mus musculus OX=10090 GN=Gemin6 PE=1 SV=2                                            | 0.86        |
| Mmp14    | P53690 | Matrix metalloproteinase-14 OS=Mus musculus OX=10090 GN=Mmp14 PE=2 SV=3                                          | 0.856666667 |
| Abrac1   | Q4KML4 | Costars family protein ABRACL OS=Mus musculus OX=10090 GN=Abrac1 PE=1 SV=1                                       | 0.916666667 |
| Copz2    | Q9JHH9 | Coatomer subunit zeta-2 OS=Mus musculus OX=10090 GN=Copz2 PE=1 SV=1                                              | 0.766666667 |
| Ndufs7   | Q9DC70 | NADH dehydrogenase [ubiquinone] iron-sulfur protein 7 mitochondrial OS=Mus musculus OX=10090 GN=Ndufs7 PE=1 SV=1 | 0.806666667 |
| Ptpmt1   | Q66GT5 | Phosphatidylglycerophosphatase and protein-tyrosine phosphatase 1 OS=Mus musculus OX=10090 GN=Ptpmt1 PE=1 SV=1   | 1.15        |
| Bckdhb   | Q6P3A8 | 2-oxoisovalerate dehydrogenase subunit beta mitochondrial OS=Mus musculus OX=10090 GN=Bckdhb PE=1 SV=1           | 0.973333333 |
| Pir      | Q9D711 | Pirin OS=Mus musculus OX=10090 GN=Pir PE=1 SV=1                                                                  | 0.973333333 |
| Tox4     | Q8BU11 | TOX high mobility group box family member 4 OS=Mus musculus OX=10090 GN=Tox4 PE=1 SV=3                           | 0.956666667 |
| Slc39a14 | Q75N73 | Metal cation symporter ZIP14 OS=Mus musculus OX=10090 GN=Slc39a14 PE=1 SV=1                                      | 1.146666667 |
| Mtmt9    | Q9Z2D0 | Myotubularin-related protein 9 OS=Mus musculus OX=10090 GN=Mtmt9 PE=1 SV=2                                       | 1.113333333 |
| Ints12   | Q9D168 | Integrator complex subunit 12 OS=Mus musculus OX=10090 GN=Ints12 PE=1 SV=1                                       | 1.26        |
| Sf3b6    | P59708 | Splicing factor 3B subunit 6 OS=Mus musculus OX=10090 GN=Sf3b6 PE=1 SV=1                                         | 0.88        |
| Ndufa11  | Q9D8B4 | NADH dehydrogenase [ubiquinone] 1 alpha subcomplex subunit 11 OS=Mus musculus OX=10090 GN=Ndufa11 PE=1 SV=1      | 1.19        |
| Dusp3    | Q9D7X3 | Dual specificity protein phosphatase 3 OS=Mus musculus OX=10090 GN=Dusp3 PE=1 SV=1                               | 0.91        |
| Gng12    | Q9DAS9 | Guanine nucleotide-binding protein G(I)/G(S)/G(O) subunit gamma-12 OS=Mus musculus OX=10090 GN=Gng12 PE=1 SV=1   | 0.856666667 |
| Hdhd2    | Q3UGR5 | Haloacid dehalogenase-like hydrolase domain-containing protein 2 OS=Mus musculus OX=10090 GN=Hdhd2 PE=1 SV=1     | 1.236666667 |
| Hacd3    | Q8K2C9 | Very-long-chain (3R)-3-hydroxyacyl-CoA dehydratase 3 OS=Mus musculus OX=10090 GN=Hacd3 PE=1 SV=1                 | 0.793333333 |
| Necap2   | Q9D1J1 | Adaptin ear-binding coat-associated protein 2 OS=Mus musculus OX=10090 GN=Necap2 PE=1 SV=1                       | 1.116666667 |
| Iscu     | Q9D7P6 | Iron-sulfur cluster assembly enzyme ISCU mitochondrial OS=Mus musculus OX=10090 GN=Iscu PE=1 SV=1                | 0.786666667 |
| Efr3a    | Q8BG67 | Protein EFR3 homolog A OS=Mus musculus OX=10090 GN=Efr3a PE=1 SV=1                                               | 0.756666667 |
| Rnf25    | Q9QZR0 | E3 ubiquitin-protein ligase RNF25 OS=Mus musculus OX=10090 GN=Rnf25 PE=1 SV=2                                    | 1.07        |
| Ube2h    | P62257 | Ubiquitin-conjugating enzyme E2 H OS=Mus musculus OX=10090 GN=Ube2h PE=1 SV=1                                    | 1.05        |
| Yif1a    | Q91XB7 | Protein YIF1A OS=Mus musculus OX=10090 GN=Yif1a PE=1 SV=1                                                        | 0.753333333 |
| Grn      | P28798 | Progranulin OS=Mus musculus OX=10090 GN=Grn PE=1 SV=2                                                            | 1.583333333 |
| Rilpl1   | Q9JJC6 | RILP-like protein 1 OS=Mus musculus OX=10090 GN=Rilpl1 PE=1 SV=1                                                 | 0.803333333 |
| Srp19    | Q9D7A6 | Signal recognition particle 19 kDa protein OS=Mus musculus OX=10090 GN=Srp19 PE=1 SV=1                           | 0.886666667 |
| Cdh13    | Q9WTR5 | Cadherin-13 OS=Mus musculus OX=10090 GN=Cdh13 PE=1 SV=2                                                          | 0.94        |
| Timm9    | Q9WV98 | Mitochondrial import inner membrane translocase subunit Tim9 OS=Mus musculus OX=10090 GN=Timm9 PE=1 SV=1         | 0.846666667 |
| Acbd6    | Q9D061 | Acyl-CoA-binding domain-containing protein 6 OS=Mus musculus OX=10090 GN=Acbd6 PE=1 SV=2                         | 0.796666667 |
| Bag4     | Q8CI61 | BAG family molecular chaperone regulator 4 OS=Mus musculus OX=10090 GN=Bag4 PE=1 SV=2                            | 2.283333333 |
| Inip     | Q3TXT3 | SOSS complex subunit C OS=Mus musculus OX=10090 GN=Inip PE=3 SV=1                                                | 0.983333333 |
| Lactb    | Q9EP89 | Serine beta-lactamase-like protein LACTB mitochondrial OS=Mus musculus OX=10090 GN=Lactb PE=1 SV=1               | 1.083333333 |
| Ramac    | Q9CQY2 | RNA guanine-N7 methyltransferase activating subunit OS=Mus musculus OX=10090 GN=Ramac PE=1 SV=1                  | 1.046666667 |

|         |        |                                                                                                  |             |
|---------|--------|--------------------------------------------------------------------------------------------------|-------------|
| Nol7    | Q9D7Z3 | Nucleolar protein 7 OS=Mus musculus OX=10090 GN=Nol7 PE=1 SV=1                                   | 1.073333333 |
| Snapi   | Q9Z266 | SNARE-associated protein Snapi OS=Mus musculus OX=10090 GN=Snapi PE=1 SV=1                       | 0.72        |
| Cdc37l1 | Q9CZP7 | Hsp90 co-chaperone Cdc37-like 1 OS=Mus musculus OX=10090 GN=Cdc37l1 PE=1 SV=1                    | 0.82        |
| Rwdd1   | Q9CQK7 | RWD domain-containing protein 1 OS=Mus musculus OX=10090 GN=Rwdd1 PE=1 SV=1                      | 0.84        |
| Chek1   | O35280 | Serine/threonine-protein kinase Chk1 OS=Mus musculus OX=10090 GN=Chek1 PE=1 SV=2                 | 0.77        |
| Tmem119 | Q8R138 | Transmembrane protein 119 OS=Mus musculus OX=10090 GN=Tmem119 PE=1 SV=1                          | 0.8         |
| Hspb11  | Q9D6H2 | Intraflagellar transport protein 25 homolog OS=Mus musculus OX=10090 GN=Hspb11 PE=1 SV=2         | 0.7         |
| Impa2   | Q91UZ5 | Inositol monophosphatase 2 OS=Mus musculus OX=10090 GN=Impa2 PE=1 SV=1                           | 0.833333333 |
| MINDY3  | Q9CV28 | Ubiquitin carboxyl-terminal hydrolase MINDY-3 OS=Mus musculus OX=10090 GN=MINDY3 PE=1 SV=        | 0.76        |
| Prnp    | P04925 | Major prion protein OS=Mus musculus OX=10090 GN=Prnp PE=1 SV=2                                   | 0.903333333 |
| Cox20   | Q9D7J4 | Cytochrome c oxidase assembly protein COX20 mitochondrial OS=Mus musculus OX=10090 GN=Cc         | 0.86        |
| Timm10b | Q9WV96 | Mitochondrial import inner membrane translocase subunit Tim10 B OS=Mus musculus OX=10090 GN=     | 0.89        |
| Clybl   | Q8R4N0 | Citramalyl-CoA lyase mitochondrial OS=Mus musculus OX=10090 GN=Clybl PE=1 SV=2                   | 0.756666667 |
| Ccnk    | O88874 | Cyclin-K OS=Mus musculus OX=10090 GN=Ccnk PE=1 SV=3                                              | 0.973333333 |
| Med22   | Q62276 | Mediator of RNA polymerase II transcription subunit 22 OS=Mus musculus OX=10090 GN=Med22 PE=     | 0.78        |
| Vps37b  | Q8R0J7 | Vacuolar protein sorting-associated protein 37B OS=Mus musculus OX=10090 GN=Vps37b PE=1 SV=      | 0.873333333 |
| Cd9     | P40240 | CD9 antigen OS=Mus musculus OX=10090 GN=Cd9 PE=1 SV=2                                            | 0.913333333 |
| Armh3   | Q6PD19 | Armadillo-like helical domain-containing protein 3 OS=Mus musculus OX=10090 GN=Armh3 PE=1 SV=    | 0.763333333 |
| Dr1     | Q91WV0 | Protein Dr1 OS=Mus musculus OX=10090 GN=Dr1 PE=1 SV=1                                            | 0.92        |
| Atn1    | O35126 | Atrophin-1 OS=Mus musculus OX=10090 GN=Atn1 PE=1 SV=1                                            | 0.966666667 |
| Gins2   | Q9D600 | DNA replication complex GINS protein PSF2 OS=Mus musculus OX=10090 GN=Gins2 PE=1 SV=1            | 0.906666667 |
| Parg    | O88622 | Poly(ADP-ribose) glycohydrolase OS=Mus musculus OX=10090 GN=Parg PE=1 SV=2                       | 1.403333333 |
| Tp53rk  | Q99PW4 | EKC/KEOPS complex subunit Tp53rk OS=Mus musculus OX=10090 GN=Tp53rk PE=2 SV=1                    | 0.863333333 |
| Cd63    | P41731 | CD63 antigen OS=Mus musculus OX=10090 GN=Cd63 PE=1 SV=2                                          | 0.736666667 |
| Ndufa6  | Q9CQZ5 | NADH dehydrogenase [ubiquinone] 1 alpha subcomplex subunit 6 OS=Mus musculus OX=10090 GN=        | 1           |
| Sgcd    | P82347 | Delta-sarcoglycan OS=Mus musculus OX=10090 GN=Sgcd PE=1 SV=1                                     | 1.55        |
| Rbl1    | Q64701 | Retinoblastoma-like protein 1 OS=Mus musculus OX=10090 GN=Rbl1 PE=1 SV=3                         | 4.11        |
| Gng10   | Q9CXP8 | Guanine nucleotide-binding protein G(I)/G(S)/G(O) subunit gamma-10 OS=Mus musculus OX=10090 GN=  | 1.063333333 |
| Akt1s1  | Q9D1F4 | Proline-rich AKT1 substrate 1 OS=Mus musculus OX=10090 GN=Akt1s1 PE=1 SV=1                       | 0.733333333 |
| Orc3    | Q9JK30 | Origin recognition complex subunit 3 OS=Mus musculus OX=10090 GN=Orc3 PE=1 SV=1                  | 1.236666667 |
| Prkrip1 | Q9CWV6 | PRKR-interacting protein 1 OS=Mus musculus OX=10090 GN=Prkrip1 PE=1 SV=2                         | 0.99        |
| Nid2    | O88322 | Nidogen-2 OS=Mus musculus OX=10090 GN=Nid2 PE=1 SV=2                                             |             |
| Ndufs6  | P52503 | NADH dehydrogenase [ubiquinone] iron-sulfur protein 6 mitochondrial OS=Mus musculus OX=10090 GN= | 0.86        |
| Vps33a  | Q9D2N9 | Vacuolar protein sorting-associated protein 33A OS=Mus musculus OX=10090 GN=Vps33a PE=1 SV=      | 1.366666667 |

|            |        |                                                                                                 |             |
|------------|--------|-------------------------------------------------------------------------------------------------|-------------|
| Dpy19l1    | A6X919 | Probable C-mannosyltransferase DPY19L1 OS=Mus musculus OX=10090 GN=Dpy19l1 PE=1 SV=1            | 1.26        |
| Alg10b     | Q3UGP8 | Putative Dol-P-Glc:Glc(2)Man(9)GlcNAc(2)-PP-Dol alpha-1 2-glucosyltransferase OS=Mus musculus ( | 0.7         |
| Ccna2      | P51943 | Cyclin-A2 OS=Mus musculus OX=10090 GN=Ccna2 PE=1 SV=2                                           | 0.89        |
| Commd7     | Q8BG94 | COMM domain-containing protein 7 OS=Mus musculus OX=10090 GN=Commd7 PE=1 SV=1                   | 1.113333333 |
| Rbms1      | Q91W59 | RNA-binding motif single-stranded-interacting protein 1 OS=Mus musculus OX=10090 GN=Rbms1 F     | 0.823333333 |
| Gpat4      | Q8K2C8 | Glycerol-3-phosphate acyltransferase 4 OS=Mus musculus OX=10090 GN=Gpat4 PE=1 SV=1              | 0.823333333 |
| Gramd4     | Q8CB44 | GRAM domain-containing protein 4 OS=Mus musculus OX=10090 GN=Gramd4 PE=1 SV=1                   | 1.426666667 |
| Senp7      | Q8BUH8 | Sentrin-specific protease 7 OS=Mus musculus OX=10090 GN=Senp7 PE=1 SV=1                         | 1.23        |
| Sh3bgrl3   | Q91VW3 | SH3 domain-binding glutamic acid-rich-like protein 3 OS=Mus musculus OX=10090 GN=Sh3bgrl3 P     | 0.956666667 |
| Hspa13     | Q8BM72 | Heat shock 70 kDa protein 13 OS=Mus musculus OX=10090 GN=Hspa13 PE=1 SV=1                       | 1.07        |
| Cebpb      | P28033 | CCAAT/enhancer-binding protein beta OS=Mus musculus OX=10090 GN=Cebpb PE=1 SV=1                 | 0.956666667 |
| Lrrk2      | Q5S006 | Leucine-rich repeat serine/threonine-protein kinase 2 OS=Mus musculus OX=10090 GN=Lrrk2 PE=1    | 1.173333333 |
| Srp14      | P16254 | Signal recognition particle 14 kDa protein OS=Mus musculus OX=10090 GN=Srp14 PE=1 SV=1          | 0.95        |
| Pinx1      | Q9CZX5 | PIN2/TERF1-interacting telomerase inhibitor 1 OS=Mus musculus OX=10090 GN=Pinx1 PE=1 SV=2       | 0.783333333 |
| Tdp2       | Q9JJX7 | Tyrosyl-DNA phosphodiesterase 2 OS=Mus musculus OX=10090 GN=Tdp2 PE=1 SV=1                      | 1.076666667 |
| Gadd45gip1 | Q9CR59 | Growth arrest and DNA damage-inducible proteins-interacting protein 1 OS=Mus musculus OX=100    | 1.01        |
| Llph       | Q9D945 | Protein LLP homolog OS=Mus musculus OX=10090 GN=Llph PE=1 SV=1                                  | 1.056666667 |
| Timm17a    | Q9Z0V8 | Mitochondrial import inner membrane translocase subunit Tim17-A OS=Mus musculus OX=10090 (      | 0.803333333 |
| Lrig1      | P70193 | Leucine-rich repeats and immunoglobulin-like domains protein 1 OS=Mus musculus OX=10090 GN:     | 1.745       |
| Gtf2e2     | Q9D902 | General transcription factor IIE subunit 2 OS=Mus musculus OX=10090 GN=Gtf2e2 PE=1 SV=2         | 0.77        |
| Cdc26      | Q99JP4 | Anaphase-promoting complex subunit CDC26 OS=Mus musculus OX=10090 GN=Cdc26 PE=1 SV=1            | 1.37        |
| Uchl1      | Q9R0P9 | Ubiquitin carboxyl-terminal hydrolase isozyme L1 OS=Mus musculus OX=10090 GN=Uchl1 PE=1 SV:     | 0.683333333 |
| Rbm7       | Q9CQT2 | RNA-binding protein 7 OS=Mus musculus OX=10090 GN=Rbm7 PE=1 SV=1                                | 1.07        |
| Ndufc2     | Q9CQ54 | NADH dehydrogenase [ubiquinone] 1 subunit C2 OS=Mus musculus OX=10090 GN=Ndufc2 PE=1 SV=        | 1.056666667 |
| Mical1     | Q8BGT6 | MICAL-like protein 1 OS=Mus musculus OX=10090 GN=Mical1 PE=1 SV=3                               | 1.12        |
| Arhgef17   | Q80U35 | Rho guanine nucleotide exchange factor 17 OS=Mus musculus OX=10090 GN=Arhgef17 PE=1 SV=2        | 0.74        |
| Ccdc51     | Q3URS9 | Mitochondrial potassium channel OS=Mus musculus OX=10090 GN=Ccdc51 PE=1 SV=1                    | 3.196666667 |
| Dda1       | Q9D9Z5 | DET1- and DDB1-associated protein 1 OS=Mus musculus OX=10090 GN=Dda1 PE=1 SV=1                  | 1.613333333 |
| Mrps14     | Q9CR88 | 28S ribosomal protein S14 mitochondrial OS=Mus musculus OX=10090 GN=Mrps14 PE=1 SV=1            | 0.86        |
| Rbm45      | Q8BHN5 | RNA-binding protein 45 OS=Mus musculus OX=10090 GN=Rbm45 PE=1 SV=1                              | 1.355       |
| Cetn2      | Q9R1K9 | Centrin-2 OS=Mus musculus OX=10090 GN=Cetn2 PE=1 SV=1                                           | 0.91        |
| Cox7a2     | P48771 | Cytochrome c oxidase subunit 7A2 mitochondrial OS=Mus musculus OX=10090 GN=Cox7a2 PE=1 S        | 0.98        |
| Romo1      | P60603 | Reactive oxygen species modulator 1 OS=Mus musculus OX=10090 GN=Romo1 PE=2 SV=1                 | 1.346666667 |
| Mrpl32     | Q9DCI9 | 39S ribosomal protein L32 mitochondrial OS=Mus musculus OX=10090 GN=Mrpl32 PE=1 SV=1            | 0.853333333 |

|          |        |                                                                                                         |             |
|----------|--------|---------------------------------------------------------------------------------------------------------|-------------|
| Sec61b   | Q9CQS8 | Protein transport protein Sec61 subunit beta OS=Mus musculus OX=10090 GN=Sec61b PE=1 SV=3               | 0.9         |
| Fam172a  | Q3TNH5 | Cotranscriptional regulator FAM172A OS=Mus musculus OX=10090 GN=Fam172a PE=1 SV=2                       | 0.876666667 |
| Gins1    | Q9CZ15 | DNA replication complex GINS protein PSF1 OS=Mus musculus OX=10090 GN=Gins1 PE=1 SV=1                   | 1.123333333 |
| Sipa1l3  | G3X9J0 | Signal-induced proliferation-associated 1-like protein 3 OS=Mus musculus OX=10090 GN=Sipa1l3 P          | 0.866666667 |
| Shq1     | Q7TMX5 | Protein SHQ1 homolog OS=Mus musculus OX=10090 GN=Shq1 PE=1 SV=2                                         | 1.436666667 |
| Golm1    | Q91XA2 | Golgi membrane protein 1 OS=Mus musculus OX=10090 GN=Golm1 PE=1 SV=2                                    | 3.29        |
| Naaa     | Q9D7V9 | N-acyl ethanolamine-hydrolyzing acid amidase OS=Mus musculus OX=10090 GN=Naaa PE=1 SV=2                 | 0.63        |
| Znfx1    | Q8R151 | NFX1-type zinc finger-containing protein 1 OS=Mus musculus OX=10090 GN=Znfx1 PE=1 SV=3                  | 0.983333333 |
| Ca13     | Q9D6N1 | Carbonic anhydrase 13 OS=Mus musculus OX=10090 GN=Ca13 PE=1 SV=1                                        | 0.67        |
| Sdf4     | Q61112 | 45 kDa calcium-binding protein OS=Mus musculus OX=10090 GN=Sdf4 PE=1 SV=1                               | 0.716666667 |
| Atxn7l3b | Q3UD01 | Ataxin-7-like protein 3B OS=Mus musculus OX=10090 GN=Atxn7l3b PE=1 SV=1                                 | 0.826666667 |
| Hdac4    | Q6NZM9 | Histone deacetylase 4 OS=Mus musculus OX=10090 GN=Hdac4 PE=1 SV=1                                       | 1.205       |
| Nsd3     | Q6P2L6 | Histone-lysine N-methyltransferase NSD3 OS=Mus musculus OX=10090 GN=Nsd3 PE=1 SV=2                      | 1.073333333 |
| Commd6   | Q3V4B5 | COMM domain-containing protein 6 OS=Mus musculus OX=10090 GN=Commd6 PE=1 SV=1                           | 1.176666667 |
| S100a13  | P97352 | Protein S100-A13 OS=Mus musculus OX=10090 GN=S100a13 PE=1 SV=1                                          | 0.873333333 |
| Cnot7    | Q60809 | CCR4-NOT transcription complex subunit 7 OS=Mus musculus OX=10090 GN=Cnot7 PE=1 SV=1                    | 0.953333333 |
| Rpap2    | Q8VC34 | Putative RNA polymerase II subunit B1 CTD phosphatase Rpap2 OS=Mus musculus OX=10090 GN=Rpap2           | 0.346666667 |
| Aldh6a1  | Q9EQ20 | Methylmalonate-semialdehyde dehydrogenase [acylating] mitochondrial OS=Mus musculus OX=10090 GN=Aldh6a1 | 0.92        |
| Cpt1a    | P97742 | Carnitine O-palmitoyltransferase 1 liver isoform OS=Mus musculus OX=10090 GN=Cpt1a PE=1 SV=4            | 1.193333333 |
| Rheb     | Q921J2 | GTP-binding protein Rheb OS=Mus musculus OX=10090 GN=Rheb PE=1 SV=1                                     | 0.793333333 |
| Ahdc1    | Q6PAL7 | AT-hook DNA-binding motif-containing protein 1 OS=Mus musculus OX=10090 GN=Ahdc1 PE=1 SV=1              | 0.953333333 |
| Dhcr7    | O88455 | 7-dehydrocholesterol reductase OS=Mus musculus OX=10090 GN=Dhcr7 PE=1 SV=1                              | 0.76        |
| Pam16    | Q9CQV1 | Mitochondrial import inner membrane translocase subunit TIM16 OS=Mus musculus OX=10090 GN=Pam16         | 1           |
| Sfxn2    | Q925N2 | Sideroflexin-2 OS=Mus musculus OX=10090 GN=Sfxn2 PE=1 SV=1                                              | 1.14        |
| Lym4     | Q8K215 | LYR motif-containing protein 4 OS=Mus musculus OX=10090 GN=Lym4 PE=1 SV=1                               | 1.033333333 |
| Timm10   | P62073 | Mitochondrial import inner membrane translocase subunit Tim10 OS=Mus musculus OX=10090 GN=Timm10        | 1.133333333 |
| Ess2     | O70279 | Splicing factor ESS-2 homolog OS=Mus musculus OX=10090 GN=Ess2 PE=1 SV=2                                | 1.72        |
| Fam210a  | Q8BGY7 | Protein FAM210A OS=Mus musculus OX=10090 GN=Fam210a PE=1 SV=1                                           | 0.78        |
| Otud6b   | Q8K2H2 | Deubiquitinase OTUD6B OS=Mus musculus OX=10090 GN=Otud6b PE=1 SV=1                                      | 0.763333333 |
| Pmf1     | Q9CPV5 | Polyamine-modulated factor 1 OS=Mus musculus OX=10090 GN=Pmf1 PE=1 SV=1                                 | 0.653333333 |
| Kptn     | Q8VCX6 | KICSTOR complex protein kaptin OS=Mus musculus OX=10090 GN=Kptn PE=2 SV=1                               | 0.746666667 |
| Eloa     | Q8CB77 | Elongin-A OS=Mus musculus OX=10090 GN=Eloa PE=1 SV=3                                                    | 0.785       |
| Larp4b   | Q6A0A2 | La-related protein 4B OS=Mus musculus OX=10090 GN=Larp4b PE=1 SV=2                                      | 0.816666667 |
| Znf830   | Q8R1N0 | Zinc finger protein 830 OS=Mus musculus OX=10090 GN=Znf830 PE=1 SV=1                                    | 0.826666667 |



|            |        |                                                                                                                        |             |
|------------|--------|------------------------------------------------------------------------------------------------------------------------|-------------|
| Ska3       | Q8C263 | Spindle and kinetochore-associated protein 3 OS=Mus musculus OX=10090 GN=Ska3 PE=2 SV=1                                | 0.69        |
| Rps19bp1   | Q8C6B9 | Active regulator of SIRT1 OS=Mus musculus OX=10090 GN=Rps19bp1 PE=1 SV=1                                               | 0.84        |
| Ccdc134    | Q8C7V8 | Coiled-coil domain-containing protein 134 OS=Mus musculus OX=10090 GN=Ccdc134 PE=1 SV=1                                | 1.26        |
| Adat2      | Q6P6J0 | tRNA-specific adenosine deaminase 2 OS=Mus musculus OX=10090 GN=Adat2 PE=1 SV=1                                        | 1.356666667 |
| Hspb6      | Q5EBG6 | Heat shock protein beta-6 OS=Mus musculus OX=10090 GN=Hspb6 PE=1 SV=1                                                  | 0.886666667 |
| Cst3       | P21460 | Cystatin-C OS=Mus musculus OX=10090 GN=Cst3 PE=1 SV=2                                                                  | 0.833333333 |
| Spcs1      | Q9D958 | Signal peptidase complex subunit 1 OS=Mus musculus OX=10090 GN=Spcs1 PE=2 SV=3                                         | 0.856666667 |
| Cetn3      | O35648 | Centrin-3 OS=Mus musculus OX=10090 GN=Cetn3 PE=1 SV=1                                                                  | 1.006666667 |
|            | Q8BGA7 | Uncharacterized protein C7orf26 homolog OS=Mus musculus OX=10090 PE=2 SV=1                                             | 3.016666667 |
| Med17      | Q8VCD5 | Mediator of RNA polymerase II transcription subunit 17 OS=Mus musculus OX=10090 GN=Med17 PE=1 SV=1                     | 1.076666667 |
| Abhd11     | Q8K4F5 | Protein ABHD11 OS=Mus musculus OX=10090 GN=Abhd11 PE=1 SV=1                                                            | 0.816666667 |
| Dtd1       | Q9DD18 | D-aminoacyl-tRNA deacylase 1 OS=Mus musculus OX=10090 GN=Dtd1 PE=1 SV=2                                                | 1.096666667 |
| Wdr91      | Q7TMQ7 | WD repeat-containing protein 91 OS=Mus musculus OX=10090 GN=Wdr91 PE=1 SV=1                                            | 1.306666667 |
| Atp6v0c    | P63082 | V-type proton ATPase 16 kDa proteolipid subunit OS=Mus musculus OX=10090 GN=Atp6v0c PE=1 SV=1                          | 0.84        |
| Paxip1     | Q6NZQ4 | PAX-interacting protein 1 OS=Mus musculus OX=10090 GN=Paxip1 PE=1 SV=1                                                 | 1.113333333 |
| Carnmt1    | Q80UY1 | Carnosine N-methyltransferase OS=Mus musculus OX=10090 GN=Carnmt1 PE=1 SV=1                                            | 1.013333333 |
| Rchy1      | Q9CR50 | RING finger and CHY zinc finger domain-containing protein 1 OS=Mus musculus OX=10090 GN=Rchy1 PE=1 SV=1                | 1.213333333 |
| Spr1a      | Q62266 | Cornifin-A OS=Mus musculus OX=10090 GN=Spr1a PE=1 SV=1                                                                 | 1.213333333 |
| Rad51      | Q08297 | DNA repair protein RAD51 homolog 1 OS=Mus musculus OX=10090 GN=Rad51 PE=1 SV=1                                         | 1.596666667 |
| D10Wsu102e | Q9CX66 | Uncharacterized protein C12orf45 homolog OS=Mus musculus OX=10090 GN=D10Wsu102e PE=1 SV=1                              | 0.87        |
| B2m        | P01887 | Beta-2-microglobulin OS=Mus musculus OX=10090 GN=B2m PE=1 SV=2                                                         | 0.966666667 |
| Becn1      | O88597 | Beclin-1 OS=Mus musculus OX=10090 GN=Becn1 PE=1 SV=3                                                                   | 1.12        |
| Dad1       | P61804 | Dolichyl-diphosphooligosaccharide--protein glycosyltransferase subunit DAD1 OS=Mus musculus OX=10090 GN=Dad1 PE=1 SV=1 | 0.9         |
| Syvn1      | Q9DBY1 | E3 ubiquitin-protein ligase synoviolin OS=Mus musculus OX=10090 GN=Syvn1 PE=1 SV=3                                     | 0.69        |
| Vtn        | P29788 | Vitronectin OS=Mus musculus OX=10090 GN=Vtn PE=1 SV=2                                                                  | 0.23        |
| Riox2      | Q8CD15 | Ribosomal oxygenase 2 OS=Mus musculus OX=10090 GN=Riox2 PE=1 SV=2                                                      | 1.126666667 |
| Dph2       | Q9CR25 | 2-(3-amino-3-carboxypropyl)histidine synthase subunit 2 OS=Mus musculus OX=10090 GN=Dph2 PE=1 SV=1                     | 0.76        |
| Cd248      | Q91V98 | Endosialin OS=Mus musculus OX=10090 GN=Cd248 PE=1 SV=1                                                                 | 1.526666667 |
| Dmap1      | Q9JI44 | DNA methyltransferase 1-associated protein 1 OS=Mus musculus OX=10090 GN=Dmap1 PE=1 SV=1                               | 0.516666667 |
| Mrps11     | Q9DCA2 | 28S ribosomal protein S11 mitochondrial OS=Mus musculus OX=10090 GN=Mrps11 PE=1 SV=2                                   | 0.993333333 |
| Trabd      | Q99JY4 | TraB domain-containing protein OS=Mus musculus OX=10090 GN=Trabd PE=1 SV=1                                             | 0.933333333 |
| Pla2g15    | Q8VEB4 | Phospholipase A2 group XV OS=Mus musculus OX=10090 GN=Pla2g15 PE=1 SV=1                                                | 0.896666667 |
| Ptcd2      | Q8R3K3 | Pentatricopeptide repeat-containing protein 2 mitochondrial OS=Mus musculus OX=10090 GN=Ptcd2 PE=1 SV=1                | 1.233333333 |
| Med8       | Q9D7W5 | Mediator of RNA polymerase II transcription subunit 8 OS=Mus musculus OX=10090 GN=Med8 PE=1 SV=1                       | 0.666666667 |

|          |        |                                                                                                   |             |
|----------|--------|---------------------------------------------------------------------------------------------------|-------------|
| Acbd5    | Q5XG73 | Acyl-CoA-binding domain-containing protein 5 OS=Mus musculus OX=10090 GN=Acbd5 PE=1 SV=1          | 1.146666667 |
| Thg1l    | Q9CY52 | Probable tRNA(His) guanylyltransferase OS=Mus musculus OX=10090 GN=Thg1l PE=1 SV=1                | 2.433333333 |
| Tmem168  | Q91VX9 | Transmembrane protein 168 OS=Mus musculus OX=10090 GN=Tmem168 PE=1 SV=1                           | 1.686666667 |
| Mphosph8 | Q3TYA6 | M-phase phosphoprotein 8 OS=Mus musculus OX=10090 GN=Mphosph8 PE=1 SV=1                           | 0.833333333 |
| Micos13  | Q8R404 | MICOS complex subunit MIC13 OS=Mus musculus OX=10090 GN=Micos13 PE=1 SV=1                         | 0.683333333 |
| Klhl42   | Q8BFQ9 | Kelch-like protein 42 OS=Mus musculus OX=10090 GN=Klhl42 PE=2 SV=1                                | 0.923333333 |
| Swi5     | Q8K3D3 | DNA repair protein SWI5 homolog OS=Mus musculus OX=10090 GN=Swi5 PE=1 SV=1                        | 0.806666667 |
| Smg9     | Q9DB90 | Protein SMG9 OS=Mus musculus OX=10090 GN=Smg9 PE=1 SV=1                                           | 0.833333333 |
| Trir     | Q9D735 | Telomerase RNA component interacting RNase OS=Mus musculus OX=10090 GN=Trir PE=1 SV=1             | 0.763333333 |
| Washc3   | Q9CR27 | WASH complex subunit 3 OS=Mus musculus OX=10090 GN=Washc3 PE=1 SV=1                               | 0.415       |
| Camlg    | P49070 | Calcium signal-modulating cyclophilin ligand OS=Mus musculus OX=10090 GN=Camlg PE=1 SV=2          | 0.863333333 |
| Vps37a   | Q8CHS8 | Vacuolar protein sorting-associated protein 37A OS=Mus musculus OX=10090 GN=Vps37a PE=1 SV=       | 0.97        |
| Commd1   | Q8K4M5 | COMM domain-containing protein 1 OS=Mus musculus OX=10090 GN=Commd1 PE=1 SV=2                     | 0.89        |
| Rps29    | P62274 | 40S ribosomal protein S29 OS=Mus musculus OX=10090 GN=Rps29 PE=1 SV=2                             | 0.886666667 |
| Atp5pf   | P97450 | ATP synthase-coupling factor 6 mitochondrial OS=Mus musculus OX=10090 GN=Atp5pf PE=1 SV=1         | 0.766666667 |
| Zc3h13   | E9Q784 | Zinc finger CCCH domain-containing protein 13 OS=Mus musculus OX=10090 GN=Zc3h13 PE=1 SV=         | 0.893333333 |
| Med29    | Q9DB91 | Mediator of RNA polymerase II transcription subunit 29 OS=Mus musculus OX=10090 GN=Med29 PE=1 SV= | 0.833333333 |
| Synrg    | Q5SV85 | Synergina gamma OS=Mus musculus OX=10090 GN=Synrg PE=1 SV=1                                       | 0.873333333 |
| Lzic     | Q8K3C3 | Protein LZIC OS=Mus musculus OX=10090 GN=Lzic PE=1 SV=1                                           | 1           |
| Cuta     | Q9CQ89 | Protein CutA OS=Mus musculus OX=10090 GN=Cuta PE=1 SV=3                                           | 0.453333333 |
| Cnot8    | Q9D8X5 | CCR4-NOT transcription complex subunit 8 OS=Mus musculus OX=10090 GN=Cnot8 PE=2 SV=1              | 1.2         |
| Cdc42ep2 | Q8JZX9 | Cdc42 effector protein 2 OS=Mus musculus OX=10090 GN=Cdc42ep2 PE=1 SV=1                           | 2.43        |
| Ccdc43   | Q9CR29 | Coiled-coil domain-containing protein 43 OS=Mus musculus OX=10090 GN=Ccdc43 PE=1 SV=1             | 0.923333333 |
| Nfkbib   | Q60778 | NF-kappa-B inhibitor beta OS=Mus musculus OX=10090 GN=Nfkbib PE=1 SV=2                            | 1.07        |
| Gstz1    | Q9WVL0 | Maleylacetoacetate isomerase OS=Mus musculus OX=10090 GN=Gstz1 PE=1 SV=1                          | 1.516666667 |
| Morc2a   | Q69ZX6 | ATPase MORC2A OS=Mus musculus OX=10090 GN=Morc2a PE=1 SV=2                                        | 1.01        |
| Trmt11   | Q9CWH5 | tRNA (guanine(10)-N2)-methyltransferase homolog OS=Mus musculus OX=10090 GN=Trmt11 PE=1 SV=       | 1.136666667 |
| Lamp2    | P17047 | Lysosome-associated membrane glycoprotein 2 OS=Mus musculus OX=10090 GN=Lamp2 PE=1 SV=2           | 0.873333333 |
| Isca1    | Q9D924 | Iron-sulfur cluster assembly 1 homolog mitochondrial OS=Mus musculus OX=10090 GN=Isca1 PE=2 SV=   | 7.55        |
| Zmym3    | Q9JLM4 | Zinc finger MYM-type protein 3 OS=Mus musculus OX=10090 GN=Zmym3 PE=1 SV=1                        | 1.175       |
| Mib1     | Q80SY4 | E3 ubiquitin-protein ligase MIB1 OS=Mus musculus OX=10090 GN=Mib1 PE=1 SV=1                       |             |
| Akap10   | O88845 | A-kinase anchor protein 10 mitochondrial OS=Mus musculus OX=10090 GN=Akap10 PE=1 SV=3             | 1.48        |
| Snrnp27  | Q8K194 | U4/U6.U5 small nuclear ribonucleoprotein 27 kDa protein OS=Mus musculus OX=10090 GN=Snrnp         | 0.623333333 |
| Fam32a   | Q9CR80 | Protein FAM32A OS=Mus musculus OX=10090 GN=Fam32a PE=2 SV=1                                       | 1.006666667 |

|         |        |                                                                                               |             |
|---------|--------|-----------------------------------------------------------------------------------------------|-------------|
| Mrpl18  | Q9CQL5 | 39S ribosomal protein L18 mitochondrial OS=Mus musculus OX=10090 GN=Mrpl18 PE=1 SV=1          | 0.616666667 |
| Lipa    | Q9Z0M5 | Lysosomal acid lipase/cholesteryl ester hydrolase OS=Mus musculus OX=10090 GN=Lipa PE=1 SV=2  | 0.69        |
|         | Q9CYI0 | Protein Njmu-R1 OS=Mus musculus OX=10090 PE=1 SV=2                                            | 0.583333333 |
| Znhit6  | Q3UFB2 | Box C/D snoRNA protein 1 OS=Mus musculus OX=10090 GN=Znhit6 PE=1 SV=2                         | 0.95        |
| Nfyc    | P70353 | Nuclear transcription factor Y subunit gamma OS=Mus musculus OX=10090 GN=Nfyc PE=1 SV=2       | 1.305       |
| Pan2    | Q8BGF7 | PAN2-PAN3 deadenylation complex catalytic subunit Pan2 OS=Mus musculus OX=10090 GN=Pan2       | 2.13        |
| Tmco1   | Q921L3 | Calcium load-activated calcium channel OS=Mus musculus OX=10090 GN=Tmco1 PE=1 SV=1            | 0.846666667 |
| Arih2   | Q9Z1K6 | E3 ubiquitin-protein ligase ARIH2 OS=Mus musculus OX=10090 GN=Arih2 PE=1 SV=1                 | 0.506666667 |
| Gltpt   | Q9JL62 | Glycolipid transfer protein OS=Mus musculus OX=10090 GN=Gltpt PE=1 SV=3                       | 44.96       |
| Agpat1  | O35083 | 1-acyl-sn-glycerol-3-phosphate acyltransferase alpha OS=Mus musculus OX=10090 GN=Agpat1 PE=1  | 0.996666667 |
| Ebp     | P70245 | 3-beta-hydroxysteroid-Delta(8) Delta(7)-isomerase OS=Mus musculus OX=10090 GN=Ebp PE=1 SV=3   | 0.583333333 |
| Fosl2   | P47930 | Fos-related antigen 2 OS=Mus musculus OX=10090 GN=Fosl2 PE=1 SV=2                             | 1.22        |
| Mcrip1  | Q3UGS4 | Mapk-regulated corepressor-interacting protein 1 OS=Mus musculus OX=10090 GN=Mcrip1 PE=1 SV=1 | 0.9         |
| Mrpl14  | Q9D1I6 | 39S ribosomal protein L14 mitochondrial OS=Mus musculus OX=10090 GN=Mrpl14 PE=1 SV=1          | 0.83        |
| Polr3b  | P59470 | DNA-directed RNA polymerase III subunit RPC2 OS=Mus musculus OX=10090 GN=Polr3b PE=1 SV=2     | 0.936666667 |
| Cdca5   | Q9CPY3 | Sororin OS=Mus musculus OX=10090 GN=Cdca5 PE=1 SV=1                                           | 0.893333333 |
|         | Q99M08 | Uncharacterized protein C4orf3 homolog OS=Mus musculus OX=10090 PE=1 SV=1                     | 1.033333333 |
| Polr2j  | O08740 | DNA-directed RNA polymerase II subunit RPB11 OS=Mus musculus OX=10090 GN=Polr2j PE=1 SV=1     | 6.123333333 |
| Spast   | Q9QYY8 | Spastin OS=Mus musculus OX=10090 GN=Spast PE=1 SV=3                                           | 1.776666667 |
| Smyd2   | Q8R5A0 | N-lysine methyltransferase SMYD2 OS=Mus musculus OX=10090 GN=Smyd2 PE=1 SV=1                  | 1.5         |
| Palm2   | Q8BR92 | Paralemmin-2 OS=Mus musculus OX=10090 GN=Palm2 PE=1 SV=1                                      | 2.46        |
| Kdsr    | Q6GV12 | 3-ketodihydrosphingosine reductase OS=Mus musculus OX=10090 GN=Kdsr PE=1 SV=1                 | 1.16        |
| Atg101  | Q9D8Z6 | Autophagy-related protein 101 OS=Mus musculus OX=10090 GN=Atg101 PE=1 SV=1                    | 0.676666667 |
| Derl2   | Q8BNI4 | Derlin-2 OS=Mus musculus OX=10090 GN=Derl2 PE=1 SV=2                                          | 0.843333333 |
| Rnf7    | Q9WTZ1 | RING-box protein 2 OS=Mus musculus OX=10090 GN=Rnf7 PE=1 SV=1                                 | 1.06        |
| Wipf1   | Q8K1I7 | WAS/WASL-interacting protein family member 1 OS=Mus musculus OX=10090 GN=Wipf1 PE=1 SV=1      | 1.91        |
| Klhl11  | Q8CE33 | Kelch-like protein 11 OS=Mus musculus OX=10090 GN=Klhl11 PE=1 SV=1                            | 1.46        |
| Fdxr    | Q61578 | NADPH:adrenodoxin oxidoreductase mitochondrial OS=Mus musculus OX=10090 GN=Fdxr PE=1 SV=1     | 1.14        |
| Tmf1    | B9EKI3 | TATA element modulatory factor OS=Mus musculus OX=10090 GN=Tmf1 PE=1 SV=2                     | 1.093333333 |
| Lyplal1 | Q3UFF7 | Lysophospholipase-like protein 1 OS=Mus musculus OX=10090 GN=Lyplal1 PE=1 SV=3                | 0.85        |
| Vps33b  | P59016 | Vacuolar protein sorting-associated protein 33B OS=Mus musculus OX=10090 GN=Vps33b PE=1 SV=1  | 1.09        |
| Mrpl54  | Q9CPW3 | 39S ribosomal protein L54 mitochondrial OS=Mus musculus OX=10090 GN=Mrpl54 PE=1 SV=1          | 0.613333333 |
| Bckdha  | P50136 | 2-oxoisovalerate dehydrogenase subunit alpha mitochondrial OS=Mus musculus OX=10090 GN=Bckdha | 1.273333333 |
| Rpl34   | Q9D1R9 | 60S ribosomal protein L34 OS=Mus musculus OX=10090 GN=Rpl34 PE=1 SV=2                         | 0.836666667 |

|          |        |                                                                                                    |             |
|----------|--------|----------------------------------------------------------------------------------------------------|-------------|
| Ttf2     | Q5NC05 | Transcription termination factor 2 OS=Mus musculus OX=10090 GN=Ttf2 PE=1 SV=2                      | 0.7         |
| Nudt3    | Q9JI46 | Diphosphoinositol polyphosphate phosphohydrolase 1 OS=Mus musculus OX=10090 GN=Nudt3 PE=1 SV=1     | 0.9         |
| Emc4     | Q9CZX9 | ER membrane protein complex subunit 4 OS=Mus musculus OX=10090 GN=Emc4 PE=1 SV=1                   | 0.976666667 |
| Mgp      | P19788 | Matrix Gla protein OS=Mus musculus OX=10090 GN=Mgp PE=3 SV=1                                       | 1.126666667 |
| Fbn1     | Q61554 | Fibrillin-1 OS=Mus musculus OX=10090 GN=Fbn1 PE=1 SV=2                                             | 1.346666667 |
| Arl6     | O88848 | ADP-ribosylation factor-like protein 6 OS=Mus musculus OX=10090 GN=Arl6 PE=1 SV=1                  | 0.87        |
| Wdr45    | Q91VM3 | WD repeat domain phosphoinositide-interacting protein 4 OS=Mus musculus OX=10090 GN=Wdr4           | 1.003333333 |
| Pias4    | Q9JM05 | E3 SUMO-protein ligase PIAS4 OS=Mus musculus OX=10090 GN=Pias4 PE=1 SV=2                           | 0.755       |
| Mrpl58   | Q8R035 | Peptidyl-tRNA hydrolase ICT1 mitochondrial OS=Mus musculus OX=10090 GN=Mrpl58 PE=1 SV=1            | 0.99        |
| Pcyt2    | Q922E4 | Ethanolamine-phosphate cytidylyltransferase OS=Mus musculus OX=10090 GN=Pcyt2 PE=1 SV=1            | 0.763333333 |
| Stard13  | Q923Q2 | StAR-related lipid transfer protein 13 OS=Mus musculus OX=10090 GN=Stard13 PE=1 SV=5               | 0.523333333 |
| Spout1   | Q3UHX9 | Putative methyltransferase C9orf114 homolog OS=Mus musculus OX=10090 GN=Spout1 PE=1 SV=1           | 0.626666667 |
| Snrpg    | P62309 | Small nuclear ribonucleoprotein G OS=Mus musculus OX=10090 GN=Snrpg PE=1 SV=1                      | 0.986666667 |
| Cd14     | P10810 | Monocyte differentiation antigen CD14 OS=Mus musculus OX=10090 GN=Cd14 PE=1 SV=1                   | 0.456666667 |
| Soga1    | E1U8D0 | Protein SOGA1 OS=Mus musculus OX=10090 GN=Soga1 PE=1 SV=3                                          | 1.1         |
| Fcf1     | Q9CTH6 | rRNA-processing protein FCF1 homolog OS=Mus musculus OX=10090 GN=Fcf1 PE=2 SV=2                    | 0.81        |
| Tle5     | P63002 | TLE family member 5 OS=Mus musculus OX=10090 GN=Tle5 PE=1 SV=1                                     | 0.693333333 |
| Cdkn2a   | P51480 | Cyclin-dependent kinase inhibitor 2A OS=Mus musculus OX=10090 GN=Cdkn2a PE=1 SV=2                  | 1.566666667 |
| Slit3    | Q9WVB4 | Slit homolog 3 protein OS=Mus musculus OX=10090 GN=Slit3 PE=2 SV=2                                 | 1.853333333 |
| Suds3    | Q8BR65 | Sin3 histone deacetylase corepressor complex component SDS3 OS=Mus musculus OX=10090 GN=S          | 1.17        |
| Map3k4   | O08648 | Mitogen-activated protein kinase kinase kinase 4 OS=Mus musculus OX=10090 GN=Map3k4 PE=1 SV=1      | 0.936666667 |
| Parl     | Q5XJY4 | Presenilins-associated rhomboid-like protein mitochondrial OS=Mus musculus OX=10090 GN=Parl        | 0.823333333 |
| Foxg1    | Q60987 | Forkhead box protein G1 OS=Mus musculus OX=10090 GN=Foxg1 PE=1 SV=1                                | 0.813333333 |
| Ccdc127  | Q3TC33 | Coiled-coil domain-containing protein 127 OS=Mus musculus OX=10090 GN=Ccdc127 PE=1 SV=2            | 1.96        |
| Ggct     | Q9D7X8 | Gamma-glutamylcyclotransferase OS=Mus musculus OX=10090 GN=Ggct PE=1 SV=1                          | 0.883333333 |
| Keap1    | Q9Z2X8 | Kelch-like ECH-associated protein 1 OS=Mus musculus OX=10090 GN=Keap1 PE=1 SV=1                    | 0.665       |
| Dcun1d5  | Q9CXV9 | DCN1-like protein 5 OS=Mus musculus OX=10090 GN=Dcun1d5 PE=1 SV=1                                  | 1.16        |
| Nceh1    | Q8BLF1 | Neutral cholesterol ester hydrolase 1 OS=Mus musculus OX=10090 GN=Nceh1 PE=1 SV=1                  | 1.363333333 |
| Myo10    | F8VQB6 | Unconventional myosin-X OS=Mus musculus OX=10090 GN=Myo10 PE=1 SV=1                                | 1.595       |
| Med27    | Q9DB40 | Mediator of RNA polymerase II transcription subunit 27 OS=Mus musculus OX=10090 GN=Med27 PE=1 SV=1 | 1.52        |
| Unc5b    | Q8K1S3 | Netrin receptor UNC5B OS=Mus musculus OX=10090 GN=Unc5b PE=1 SV=1                                  | 1.016666667 |
| Kct2     | Q8K201 | Keratinocyte-associated transmembrane protein 2 OS=Mus musculus OX=10090 GN=Kct2 PE=1 SV=1         | 0.923333333 |
| Cdr2     | P97817 | Cerebellar degeneration-related protein 2 OS=Mus musculus OX=10090 GN=Cdr2 PE=1 SV=2               | 0.77        |
| Kiaa1671 | Q8BRV5 | Uncharacterized protein KIAA1671 OS=Mus musculus OX=10090 GN=Kiaa1671 PE=2 SV=1                    | 1.29        |

|           |        |                                                                                                                                        |             |
|-----------|--------|----------------------------------------------------------------------------------------------------------------------------------------|-------------|
| Tmem115   | Q9WUH1 | Transmembrane protein 115 OS=Mus musculus OX=10090 GN=Tmem115 PE=1 SV=1                                                                | 1.12        |
| Chuk      | Q60680 | Inhibitor of nuclear factor kappa-B kinase subunit alpha OS=Mus musculus OX=10090 GN=Chuk PE=1 SV=1                                    | 1.115       |
| Commd2    | Q8BXC6 | COMM domain-containing protein 2 OS=Mus musculus OX=10090 GN=Commd2 PE=1 SV=1                                                          | 0.95        |
| Xrcc4     | Q924T3 | DNA repair protein XRCC4 OS=Mus musculus OX=10090 GN=Xrcc4 PE=1 SV=1                                                                   | 0.766666667 |
| Mnd1      | Q8K396 | Meiotic nuclear division protein 1 homolog OS=Mus musculus OX=10090 GN=Mnd1 PE=1 SV=1                                                  | 0.46        |
| Vkorc1l1  | Q6TEK5 | Vitamin K epoxide reductase complex subunit 1-like protein 1 OS=Mus musculus OX=10090 GN=Vkorc1l1 PE=1 SV=1                            | 0.853333333 |
| Slc25a30  | Q9CR58 | Kidney mitochondrial carrier protein 1 OS=Mus musculus OX=10090 GN=Slc25a30 PE=1 SV=1                                                  | 0.98        |
| Rtf2      | Q99K95 | Replication termination factor 2 OS=Mus musculus OX=10090 GN=Rtf2 PE=1 SV=1                                                            | 0.796666667 |
| Uhrf1bp1l | A2RSJ4 | UHRF1-binding protein 1-like OS=Mus musculus OX=10090 GN=Uhrf1bp1l PE=1 SV=2                                                           |             |
| Sema3a    | O08665 | Semaphorin-3A OS=Mus musculus OX=10090 GN=Sema3a PE=1 SV=2                                                                             | 1.14        |
| Plg       | P20918 | Plasminogen OS=Mus musculus OX=10090 GN=Plg PE=1 SV=3                                                                                  | 0.263333333 |
| Riox1     | Q9JJF3 | Ribosomal oxygenase 1 OS=Mus musculus OX=10090 GN=Riox1 PE=1 SV=2                                                                      | 0.586666667 |
| Iqsec1    | Q8R0S2 | IQ motif and SEC7 domain-containing protein 1 OS=Mus musculus OX=10090 GN=Iqsec1 PE=1 SV=2                                             | 0.843333333 |
| Arhgef12  | Q8R4H2 | Rho guanine nucleotide exchange factor 12 OS=Mus musculus OX=10090 GN=Arhgef12 PE=1 SV=2                                               | 1.57        |
| Eri3      | Q8C460 | ERI1 exoribonuclease 3 OS=Mus musculus OX=10090 GN=Eri3 PE=1 SV=1                                                                      | 0.82        |
| Taf5l     | Q91WQ5 | TAF5-like RNA polymerase II p300/CBP-associated factor-associated factor 65 kDa subunit 5L OS=Mus musculus OX=10090 GN=Taf5l PE=1 SV=1 | 1.21        |
| Fnbp1l    | Q8K012 | Formin-binding protein 1-like OS=Mus musculus OX=10090 GN=Fnbp1l PE=1 SV=2                                                             | 0.696666667 |
| Leo1      | Q5XJE5 | RNA polymerase-associated protein LEO1 OS=Mus musculus OX=10090 GN=Leo1 PE=1 SV=2                                                      | 0.636666667 |
| Med9      | Q8VCS6 | Mediator of RNA polymerase II transcription subunit 9 OS=Mus musculus OX=10090 GN=Med9 PE=1 SV=2                                       | 0.93        |
| Coq7      | P97478 | 5-demethoxyubiquinone hydroxylase mitochondrial OS=Mus musculus OX=10090 GN=Coq7 PE=1 SV=1                                             | 0.703333333 |
| Mrps12    | O35680 | 28S ribosomal protein S12 mitochondrial OS=Mus musculus OX=10090 GN=Mrps12 PE=2 SV=1                                                   | 1.265       |
| Rab3il1   | Q8VDV3 | Guanine nucleotide exchange factor for Rab-3A OS=Mus musculus OX=10090 GN=Rab3il1 PE=1 SV=1                                            | 1.06        |
| Yipf3     | Q3UDR8 | Protein YIPF3 OS=Mus musculus OX=10090 GN=Yipf3 PE=1 SV=1                                                                              | 0.725       |
| Adat3     | Q6PAT0 | Probable inactive tRNA-specific adenosine deaminase-like protein 3 OS=Mus musculus OX=10090 GN=Adat3 PE=1 SV=1                         | 1.396666667 |
| Coa3      | Q9D2R6 | Cytochrome c oxidase assembly factor 3 homolog mitochondrial OS=Mus musculus OX=10090 GN=Coa3 PE=1 SV=1                                | 0.896666667 |
| Mrps18c   | Q8R2L5 | 28S ribosomal protein S18c mitochondrial OS=Mus musculus OX=10090 GN=Mrps18c PE=1 SV=1                                                 | 0.915       |
| Cbr2      | P08074 | Carbonyl reductase [NADPH] 2 OS=Mus musculus OX=10090 GN=Cbr2 PE=1 SV=1                                                                | 1.24        |
| Nde1      | Q9CZA6 | Nuclear distribution protein nudE homolog 1 OS=Mus musculus OX=10090 GN=Nde1 PE=1 SV=1                                                 | 1.916666667 |
| Siae      | P70665 | Sialate O-acetyltransferase OS=Mus musculus OX=10090 GN=Siae PE=1 SV=3                                                                 | 0.923333333 |
| Cmas      | Q99KK2 | N-acetylneuraminyl transferase OS=Mus musculus OX=10090 GN=Cmas PE=1 SV=2                                                              | 1.18        |
| Nrp2      | O35375 | Neuropilin-2 OS=Mus musculus OX=10090 GN=Nrp2 PE=1 SV=2                                                                                | 0.535       |
| Szrd1     | Q6NXN1 | SUZ domain-containing protein 1 OS=Mus musculus OX=10090 GN=Szrd1 PE=1 SV=1                                                            | 1.283333333 |
| Vmp1      | Q99KU0 | Vacuole membrane protein 1 OS=Mus musculus OX=10090 GN=Vmp1 PE=1 SV=2                                                                  | 0.95        |
| L2hgdh    | Q91YP0 | L-2-hydroxyglutarate dehydrogenase mitochondrial OS=Mus musculus OX=10090 GN=L2hgdh PE=1 SV=1                                          | 0.893333333 |



|         |        |                                                                                                             |             |
|---------|--------|-------------------------------------------------------------------------------------------------------------|-------------|
| Etnk1   | Q9D4V0 | Ethanolamine kinase 1 OS=Mus musculus OX=10090 GN=Etnk1 PE=1 SV=2                                           | 0.703333333 |
| Mrpl28  | Q9D1B9 | 39S ribosomal protein L28 mitochondrial OS=Mus musculus OX=10090 GN=Mrpl28 PE=1 SV=3                        | 1.126666667 |
| Ndufa13 | Q9ERS2 | NADH dehydrogenase [ubiquinone] 1 alpha subcomplex subunit 13 OS=Mus musculus OX=10090 GN=Ndufa13 PE=1 SV=1 | 0.943333333 |
| Ppt2    | O35448 | Lysosomal thioesterase PPT2 OS=Mus musculus OX=10090 GN=Ppt2 PE=1 SV=1                                      | 1.186666667 |
| Ints14  | Q8R3P6 | Integrator complex subunit 14 OS=Mus musculus OX=10090 GN=Ints14 PE=1 SV=1                                  | 0.666666667 |
| Tmem97  | Q8VD00 | Sigma intracellular receptor 2 OS=Mus musculus OX=10090 GN=Tmem97 PE=1 SV=1                                 | 0.646666667 |
| Polr3f  | Q921X6 | DNA-directed RNA polymerase III subunit RPC6 OS=Mus musculus OX=10090 GN=Polr3f PE=1 SV=1                   | 1.293333333 |
| GImp    | Q9JHJ3 | Glycosylated lysosomal membrane protein OS=Mus musculus OX=10090 GN=GImp PE=1 SV=1                          | 0.973333333 |
| Ndufa2  | Q9CQ75 | NADH dehydrogenase [ubiquinone] 1 alpha subcomplex subunit 2 OS=Mus musculus OX=10090 GN=Ndufa2 PE=1 SV=1   | 0.926666667 |
| Aars2   | Q14CH7 | Alanine-tRNA ligase mitochondrial OS=Mus musculus OX=10090 GN=Aars2 PE=1 SV=1                               | 1.626666667 |
| Arfp2   | Q8K221 | Arfaptin-2 OS=Mus musculus OX=10090 GN=Arfp2 PE=1 SV=2                                                      | 1.696666667 |
| Hspb8   | Q9JK92 | Heat shock protein beta-8 OS=Mus musculus OX=10090 GN=Hspb8 PE=1 SV=1                                       | 0.856666667 |
| Fam107b | Q3TGF2 | Protein FAM107B OS=Mus musculus OX=10090 GN=Fam107b PE=1 SV=2                                               | 1.3         |
| Maip1   | Q8BHE8 | m-AAA protease-interacting protein 1 mitochondrial OS=Mus musculus OX=10090 GN=Maip1 PE=1 SV=1              | 0.973333333 |
| Lpar1   | P61793 | Lysophosphatidic acid receptor 1 OS=Mus musculus OX=10090 GN=Lpar1 PE=1 SV=1                                | 1.05        |
| Cd82    | P40237 | CD82 antigen OS=Mus musculus OX=10090 GN=Cd82 PE=1 SV=1                                                     | 1.153333333 |
| Wdsub1  | Q9D0I6 | WD repeat SAM and U-box domain-containing protein 1 OS=Mus musculus OX=10090 GN=Wdsub1 PE=1 SV=1            | 1.29        |
| Commd4  | Q9CQ02 | COMM domain-containing protein 4 OS=Mus musculus OX=10090 GN=Commd4 PE=1 SV=1                               | 1.976666667 |
| Elovl6  | Q920L5 | Elongation of very long chain fatty acids protein 6 OS=Mus musculus OX=10090 GN=Elovl6 PE=1 SV=1            | 1.446666667 |
| Arnt    | P53762 | Aryl hydrocarbon receptor nuclear translocator OS=Mus musculus OX=10090 GN=Arnt PE=1 SV=3                   |             |
| Gpalpp1 | Q69ZC8 | GPALPP motifs-containing protein 1 OS=Mus musculus OX=10090 GN=Gpalpp1 PE=1 SV=2                            |             |
| Ankrd46 | Q8BTZ5 | Ankyrin repeat domain-containing protein 46 OS=Mus musculus OX=10090 GN=Ankrd46 PE=1 SV=1                   | 1.246666667 |
| Casp12  | O08736 | Caspase-12 OS=Mus musculus OX=10090 GN=Casp12 PE=1 SV=1                                                     | 8.74        |
| Haus8   | Q99L00 | HAUS augmin-like complex subunit 8 OS=Mus musculus OX=10090 GN=Haus8 PE=1 SV=2                              | 0.406666667 |
| Hspa12b | Q9CZJ2 | Heat shock 70 kDa protein 12B OS=Mus musculus OX=10090 GN=Hspa12b PE=1 SV=1                                 | 1.11        |
| Hltf    | Q6PCN7 | Helicase-like transcription factor OS=Mus musculus OX=10090 GN=Hltf PE=1 SV=1                               | 4.925       |
| Coro7   | Q9D2V7 | Coronin-7 OS=Mus musculus OX=10090 GN=Coro7 PE=1 SV=2                                                       | 1.326666667 |
| Bmt2    | Q8BXX4 | S-adenosylmethionine sensor upstream of mTORC1 OS=Mus musculus OX=10090 GN=Bmt2 PE=2 SV=1                   | 1.08        |
| Med19   | Q8C1S0 | Mediator of RNA polymerase II transcription subunit 19 OS=Mus musculus OX=10090 GN=Med19 PE=1 SV=1          | 1.05        |
| Cox6c   | Q9CPQ1 | Cytochrome c oxidase subunit 6C OS=Mus musculus OX=10090 GN=Cox6c PE=1 SV=3                                 | 0.845       |
| Cnot4   | Q8BT14 | CCR4-NOT transcription complex subunit 4 OS=Mus musculus OX=10090 GN=Cnot4 PE=1 SV=2                        |             |
| Eogt    | Q8BYW9 | EGF domain-specific O-linked N-acetylglucosamine transferase OS=Mus musculus OX=10090 GN=Eogt PE=1 SV=1     | 0.5         |
| Med7    | Q9CZB6 | Mediator of RNA polymerase II transcription subunit 7 OS=Mus musculus OX=10090 GN=Med7 PE=1 SV=1            | 2.08        |
| Rnf14   | Q9JI90 | E3 ubiquitin-protein ligase RNF14 OS=Mus musculus OX=10090 GN=Rnf14 PE=1 SV=2                               | 1.34        |

|          |        |                                                                                                                                             |             |
|----------|--------|---------------------------------------------------------------------------------------------------------------------------------------------|-------------|
| Gvin1    | Q80SU7 | Interferon-induced very large GTPase 1 OS=Mus musculus OX=10090 GN=Gvin1 PE=1 SV=1                                                          | 0.42        |
| Dynll1   | P63168 | Dynein light chain 1 cytoplasmic OS=Mus musculus OX=10090 GN=Dynll1 PE=1 SV=1                                                               | 0.903333333 |
| Dynll2   | Q9D0M5 | Dynein light chain 2 cytoplasmic OS=Mus musculus OX=10090 GN=Dynll2 PE=1 SV=1                                                               | 1.01        |
| Rab3b    | Q9CZT8 | Ras-related protein Rab-3B OS=Mus musculus OX=10090 GN=Rab3b PE=1 SV=1                                                                      | 0.495       |
| Naa11    | Q3UX61 | N-alpha-acetyltransferase 11 OS=Mus musculus OX=10090 GN=Naa11 PE=1 SV=1                                                                    |             |
| Stk25    | Q9Z2W1 | Serine/threonine-protein kinase 25 OS=Mus musculus OX=10090 GN=Stk25 PE=1 SV=2                                                              |             |
| Krt5     | Q922U2 | Keratin type II cytoskeletal 5 OS=Mus musculus OX=10090 GN=Krt5 PE=1 SV=1                                                                   | 0           |
| Smad5    | P97454 | Mothers against decapentaplegic homolog 5 OS=Mus musculus OX=10090 GN=Smad5 PE=1 SV=2                                                       | 0.786666667 |
| Ube2e1   | P52482 | Ubiquitin-conjugating enzyme E2 E1 OS=Mus musculus OX=10090 GN=Ube2e1 PE=1 SV=1                                                             | 3.15        |
| Ugt1a7c  | Q6ZQM8 | UDP-glucuronosyltransferase 1A7 OS=Mus musculus OX=10090 GN=Ugt1a7 PE=1 SV=1                                                                |             |
| Akr1b7   | P21300 | Aldo-keto reductase family 1 member B7 OS=Mus musculus OX=10090 GN=Akr1b7 PE=1 SV=4                                                         | 0.76        |
| Krt79    | Q8VED5 | Keratin type II cytoskeletal 79 OS=Mus musculus OX=10090 GN=Krt79 PE=1 SV=2                                                                 | 0.003333333 |
| Chd2     | E9PZM4 | Chromodomain-helicase-DNA-binding protein 2 OS=Mus musculus OX=10090 GN=Chd2 PE=1 SV=1                                                      | 1.065       |
| Plxna2   | P70207 | Plexin-A2 OS=Mus musculus OX=10090 GN=Plxna2 PE=1 SV=2                                                                                      |             |
| Abi2     | P62484 | Abl interactor 2 OS=Mus musculus OX=10090 GN=Abi2 PE=1 SV=1                                                                                 | 1.01        |
| Smardc3  | Q6P9Z1 | SWI/SNF-related matrix-associated actin-dependent regulator of chromatin subfamily D member 3 OS=Mus musculus OX=10090 GN=Smardc3 PE=1 SV=1 | 1.47        |
| Igf1r    | Q60751 | Insulin-like growth factor 1 receptor OS=Mus musculus OX=10090 GN=Igf1r PE=1 SV=3                                                           | 0.996666667 |
| Scd1     | P13516 | Acyl-CoA desaturase 1 OS=Mus musculus OX=10090 GN=Scd1 PE=1 SV=2                                                                            | 0.983333333 |
| Eif1ax   | Q8BMJ3 | Eukaryotic translation initiation factor 1A X-chromosomal OS=Mus musculus OX=10090 GN=Eif1ax                                                | 0.856666667 |
| Srpk2    | O54781 | SRSF protein kinase 2 OS=Mus musculus OX=10090 GN=Srpk2 PE=1 SV=2                                                                           | 1.01        |
| Erlin1   | Q91X78 | Erlin-1 OS=Mus musculus OX=10090 GN=Erlin1 PE=1 SV=2                                                                                        | 0.673333333 |
| Pank3    | Q8R2W9 | Pantothenate kinase 3 OS=Mus musculus OX=10090 GN=Pank3 PE=2 SV=1                                                                           | 0.89        |
| Rab4a    | P56371 | Ras-related protein Rab-4A OS=Mus musculus OX=10090 GN=Rab4a PE=1 SV=2                                                                      | 0.683333333 |
| Ring1    | O35730 | E3 ubiquitin-protein ligase RING1 OS=Mus musculus OX=10090 GN=Ring1 PE=1 SV=2                                                               | 0.483333333 |
| Ppp1r12b | Q8BG95 | Protein phosphatase 1 regulatory subunit 12B OS=Mus musculus OX=10090 GN=Ppp1r12b PE=1 SV=1                                                 | 0.686666667 |
| Slc12a7  | Q9WVL3 | Solute carrier family 12 member 7 OS=Mus musculus OX=10090 GN=Slc12a7 PE=1 SV=1                                                             | 1.01        |
| Ptpn14   | Q62130 | Tyrosine-protein phosphatase non-receptor type 14 OS=Mus musculus OX=10090 GN=Ptpn14 PE=1 SV=1                                              | 0.605       |
| Armxc3   | Q8BHS6 | Armadillo repeat-containing X-linked protein 3 OS=Mus musculus OX=10090 GN=Armxc3 PE=1 SV=1                                                 | 1.293333333 |
| Ifitm3   | Q9CQW9 | Interferon-induced transmembrane protein 3 OS=Mus musculus OX=10090 GN=Ifitm3 PE=1 SV=1                                                     | 1.066666667 |
| Prrx1    | P63013 | Paired mesoderm homeobox protein 1 OS=Mus musculus OX=10090 GN=Prrx1 PE=1 SV=1                                                              | 0.913333333 |
| Parvb    | Q9ES46 | Beta-parvin OS=Mus musculus OX=10090 GN=Parvb PE=1 SV=1                                                                                     | 0.966666667 |
| Aurka    | P97477 | Aurora kinase A OS=Mus musculus OX=10090 GN=Aurka PE=1 SV=1                                                                                 | 1.95        |
| Cenpe    | Q6RT24 | Centromere-associated protein E OS=Mus musculus OX=10090 GN=Cenpe PE=1 SV=1                                                                 | 1.236666667 |
| Mapre2   | Q8R001 | Microtubule-associated protein RP/EB family member 2 OS=Mus musculus OX=10090 GN=Mapre2                                                     | 0.783333333 |

|           |        |                                                                                                               |             |
|-----------|--------|---------------------------------------------------------------------------------------------------------------|-------------|
| Znf22     | Q9ERU3 | Zinc finger protein 22 OS=Mus musculus OX=10090 GN=Znf22 PE=1 SV=2                                            | 1.276666667 |
| Lsm1      | Q8VC85 | U6 snRNA-associated Sm-like protein LSm1 OS=Mus musculus OX=10090 GN=Lsm1 PE=1 SV=1                           | 1.29        |
| Rab33b    | O35963 | Ras-related protein Rab-33B OS=Mus musculus OX=10090 GN=Rab33b PE=1 SV=1                                      | 1.456666667 |
| Agap3     | Q8VHH5 | Arf-GAP with GTPase ANK repeat and PH domain-containing protein 3 OS=Mus musculus OX=10090 GN=Agap3 PE=1 SV=1 | 1.483333333 |
| Rcbtb2    | Q99LJ7 | RCC1 and BTB domain-containing protein 2 OS=Mus musculus OX=10090 GN=Rcbtb2 PE=1 SV=1                         | 0.923333333 |
| Akr1e2    | Q9DCT1 | 1 5-anhydro-D-fructose reductase OS=Mus musculus OX=10090 GN=Akr1e2 PE=1 SV=1                                 | 1.066666667 |
| Tarsl2    | Q8BLY2 | Threonine-tRNA ligase 2 cytoplasmic OS=Mus musculus OX=10090 GN=Tars3 PE=1 SV=1                               | 1.615       |
| Dhx57     | Q6P5D3 | Putative ATP-dependent RNA helicase DHX57 OS=Mus musculus OX=10090 GN=Dhx57 PE=1 SV=2                         | 0.913333333 |
| Gna13     | P27601 | Guanine nucleotide-binding protein subunit alpha-13 OS=Mus musculus OX=10090 GN=Gna13 PE=1 SV=1               | 0.776666667 |
| Agap1     | Q8BXX8 | Arf-GAP with GTPase ANK repeat and PH domain-containing protein 1 OS=Mus musculus OX=10090 GN=Agap1 PE=1 SV=1 | 1.706666667 |
| Tcf12     | Q61286 | Transcription factor 12 OS=Mus musculus OX=10090 GN=Tcf12 PE=1 SV=2                                           | 0.876666667 |
| Hcfc2     | Q9D968 | Host cell factor 2 OS=Mus musculus OX=10090 GN=Hcfc2 PE=1 SV=2                                                | 1.14        |
| Parp2     | O88554 | Poly [ADP-ribose] polymerase 2 OS=Mus musculus OX=10090 GN=Parp2 PE=1 SV=3                                    | 0.826666667 |
| Ipo13     | Q8K0C1 | Importin-13 OS=Mus musculus OX=10090 GN=Ipo13 PE=1 SV=1                                                       | 1.233333333 |
| Papss2    | O88428 | Bifunctional 3'-phosphoadenosine 5'-phosphosulfate synthase 2 OS=Mus musculus OX=10090 GN=Papss2 PE=1 SV=1    | 2.323333333 |
| Gabarapl2 | P60521 | Gamma-aminobutyric acid receptor-associated protein-like 2 OS=Mus musculus OX=10090 GN=Gabarapl2 PE=1 SV=1    | 1.11        |
| Bcl7c     | O08664 | B-cell CLL/lymphoma 7 protein family member C OS=Mus musculus OX=10090 GN=Bcl7c PE=1 SV=1                     | 1.213333333 |
| Pip4p1    | Q3TWL2 | Type 1 phosphatidylinositol 4 5-bisphosphate 4-phosphatase OS=Mus musculus OX=10090 GN=Pip4p1 PE=1 SV=1       | 0.646666667 |
| Tsc22d4   | Q9EQN3 | TSC22 domain family protein 4 OS=Mus musculus OX=10090 GN=Tsc22d4 PE=1 SV=2                                   | 0.65        |
| Hirip3    | Q8BLH7 | HIRA-interacting protein 3 OS=Mus musculus OX=10090 GN=Hirip3 PE=1 SV=1                                       | 0.903333333 |
| Dynlt1    | P51807 | Dynein light chain Tctex-type 1 OS=Mus musculus OX=10090 GN=Dynlt1 PE=1 SV=1                                  | 1.033333333 |
| Rps26     | P62855 | 40S ribosomal protein S26 OS=Mus musculus OX=10090 GN=Rps26 PE=1 SV=3                                         | 0.86        |
| Lamtor5   | Q9D1L9 | Ragulator complex protein LAMTOR5 OS=Mus musculus OX=10090 GN=Lamtor5 PE=1 SV=1                               | 0.903333333 |
| Erh       | P84089 | Enhancer of rudimentary homolog OS=Mus musculus OX=10090 GN=Erh PE=1 SV=1                                     | 0.856666667 |
| Psm10     | Q9Z2X2 | 26S proteasome non-ATPase regulatory subunit 10 OS=Mus musculus OX=10090 GN=Psm10 PE=1 SV=1                   | 0.87        |
| Ptma      | P26350 | Prothymosin alpha OS=Mus musculus OX=10090 GN=Ptma PE=1 SV=2                                                  | 0.873333333 |
| Rpl7l1    | Q9D8M4 | 60S ribosomal protein L7-like 1 OS=Mus musculus OX=10090 GN=Rpl7l1 PE=1 SV=1                                  | 0.88        |
| Commd3    | Q63829 | COMM domain-containing protein 3 OS=Mus musculus OX=10090 GN=Commd3 PE=1 SV=1                                 | 0.95        |
| Rps21     | Q9CQR2 | 40S ribosomal protein S21 OS=Mus musculus OX=10090 GN=Rps21 PE=1 SV=1                                         | 0.946666667 |
| Trmt112   | Q9DCG9 | Multifunctional methyltransferase subunit TRM112-like protein OS=Mus musculus OX=10090 GN=Trmt112 PE=1 SV=1   | 0.853333333 |
| Cnpy3     | Q9DAU1 | Protein canopy homolog 3 OS=Mus musculus OX=10090 GN=Cnpy3 PE=1 SV=1                                          | 0.933333333 |
| Rictor    | Q6QI06 | Rapamycin-insensitive companion of mTOR OS=Mus musculus OX=10090 GN=Rictor PE=1 SV=2                          | 1.456666667 |
| Tfdp1     | Q08639 | Transcription factor Dp-1 OS=Mus musculus OX=10090 GN=Tfdp1 PE=1 SV=1                                         | 0.83        |
| Dynlrb1   | P62627 | Dynein light chain roadblock-type 1 OS=Mus musculus OX=10090 GN=Dynlrb1 PE=1 SV=3                             | 0.843333333 |

|          |        |                                                                                                                           |             |
|----------|--------|---------------------------------------------------------------------------------------------------------------------------|-------------|
| Suz12    | Q80U70 | Polycomb protein Suz12 OS=Mus musculus OX=10090 GN=Suz12 PE=1 SV=2                                                        | 0.886666667 |
| Rcor1    | Q8CFE3 | REST corepressor 1 OS=Mus musculus OX=10090 GN=Rcor1 PE=1 SV=3                                                            | 0.873333333 |
| Surf2    | P09926 | Surfeit locus protein 2 OS=Mus musculus OX=10090 GN=Surf2 PE=1 SV=1                                                       | 0.986666667 |
| Grcc10   | O35127 | Protein C10 OS=Mus musculus OX=10090 GN=Grcc10 PE=1 SV=1                                                                  | 1.563333333 |
| Mettl2   | Q8BMK1 | tRNA N(3)-methylcytidine methyltransferase METTL2 OS=Mus musculus OX=10090 GN=Mettl2 PE=1 SV=1                            | 1           |
| Snrpd1   | P62315 | Small nuclear ribonucleoprotein Sm D1 OS=Mus musculus OX=10090 GN=Snrpd1 PE=1 SV=1                                        | 0.8         |
| Nom1     | Q3UFM5 | Nucleolar MIF4G domain-containing protein 1 OS=Mus musculus OX=10090 GN=Nom1 PE=1 SV=2                                    | 1.07        |
| Tmem165  | P52875 | Transmembrane protein 165 OS=Mus musculus OX=10090 GN=Tmem165 PE=1 SV=2                                                   | 0.78        |
| Piezo1   | E2JF22 | Piezo-type mechanosensitive ion channel component 1 OS=Mus musculus OX=10090 GN=Piezo1 PE=1 SV=1                          | 0.79        |
| Gtse1    | Q8R080 | G2 and S phase-expressed protein 1 OS=Mus musculus OX=10090 GN=Gtse1 PE=1 SV=2                                            | 0.763333333 |
| Mxra7    | Q9CZH7 | Matrix-remodeling-associated protein 7 OS=Mus musculus OX=10090 GN=Mxra7 PE=1 SV=2                                        | 0.926666667 |
| Etv6     | P97360 | Transcription factor ETV6 OS=Mus musculus OX=10090 GN=Etv6 PE=1 SV=1                                                      | 1.01        |
| Cdk5rap3 | Q99LM2 | CDK5 regulatory subunit-associated protein 3 OS=Mus musculus OX=10090 GN=Cdk5rap3 PE=1 SV=1                               | 0.593333333 |
| Scarb1   | Q61009 | Scavenger receptor class B member 1 OS=Mus musculus OX=10090 GN=Scarb1 PE=1 SV=1                                          | 0.856666667 |
| Xdh      | Q00519 | Xanthine dehydrogenase/oxidase OS=Mus musculus OX=10090 GN=Xdh PE=1 SV=5                                                  | 1.096666667 |
| Ndufa10  | Q99LC3 | NADH dehydrogenase [ubiquinone] 1 alpha subcomplex subunit 10 mitochondrial OS=Mus musculus OX=10090 GN=Ndufa10 PE=1 SV=1 | 0.833333333 |
| Uprt     | B1AVZ0 | Uracil phosphoribosyltransferase homolog OS=Mus musculus OX=10090 GN=Uprt PE=1 SV=1                                       | 0.93        |
| Asf1a    | Q9CQE6 | Histone chaperone ASF1A OS=Mus musculus OX=10090 GN=Asf1a PE=1 SV=1                                                       | 0.71        |
| Adamts1  | P97857 | ADAMTS-1 metalloproteinase with thrombospondin motifs 1 OS=Mus musculus OX=10090 GN=Adamts1 PE=1 SV=1                     | 0.913333333 |
| Purb     | O35295 | Transcriptional activator protein Pur-beta OS=Mus musculus OX=10090 GN=Purb PE=1 SV=3                                     | 0.796666667 |
| Ubr1     | O70481 | E3 ubiquitin-protein ligase UBR1 OS=Mus musculus OX=10090 GN=Ubr1 PE=1 SV=2                                               | 1.46        |
| Nfat5    | Q9WV30 | Nuclear factor of activated T-cells 5 OS=Mus musculus OX=10090 GN=Nfat5 PE=1 SV=2                                         | 1.526666667 |
| Rnaseh2c | Q9CQ18 | Ribonuclease H2 subunit C OS=Mus musculus OX=10090 GN=Rnaseh2c PE=1 SV=1                                                  | 0.99        |
| Plaur    | P35456 | Urokinase plasminogen activator surface receptor OS=Mus musculus OX=10090 GN=Plaur PE=1 SV=1                              | 2.183333333 |
| Rbbp9    | O88851 | Putative hydrolase RBBP9 OS=Mus musculus OX=10090 GN=Rbbp9 PE=1 SV=2                                                      | 0.813333333 |
| Abitram  | Q80ZQ9 | Protein Abitram OS=Mus musculus OX=10090 GN=Abitram PE=1 SV=2                                                             | 0.77        |
| Lamp1    | P11438 | Lysosome-associated membrane glycoprotein 1 OS=Mus musculus OX=10090 GN=Lamp1 PE=1 SV=2                                   | 0.893333333 |
| Bckdk    | O55028 | [3-methyl-2-oxobutanoate dehydrogenase [lipoamide]] kinase mitochondrial OS=Mus musculus OX=10090 GN=Bckdk PE=1 SV=1      | 1.416666667 |
| Pom121   | Q8K3Z9 | Nuclear envelope pore membrane protein POM 121 OS=Mus musculus OX=10090 GN=Pom121 PE=1 SV=1                               | 1.093333333 |
| Ube2j1   | Q9JJZ4 | Ubiquitin-conjugating enzyme E2 J1 OS=Mus musculus OX=10090 GN=Ube2j1 PE=1 SV=2                                           | 0.913333333 |
| Psmg3    | Q9CZH3 | Proteasome assembly chaperone 3 OS=Mus musculus OX=10090 GN=Psmg3 PE=1 SV=1                                               | 0.893333333 |
| Ufm1     | P61961 | Ubiquitin-fold modifier 1 OS=Mus musculus OX=10090 GN=Ufm1 PE=1 SV=1                                                      | 0.813333333 |
| Slu7     | Q8BHJ9 | Pre-mRNA-splicing factor SLU7 OS=Mus musculus OX=10090 GN=Slu7 PE=1 SV=1                                                  | 0.836666667 |
| Morf4l1  | P60762 | Mortality factor 4-like protein 1 OS=Mus musculus OX=10090 GN=Morf4l1 PE=1 SV=2                                           | 1.043333333 |

|          |        |                                                                                                    |             |
|----------|--------|----------------------------------------------------------------------------------------------------|-------------|
| Ubr3     | Q5U430 | E3 ubiquitin-protein ligase UBR3 OS=Mus musculus OX=10090 GN=Ubr3 PE=1 SV=3                        | 1.41        |
| Smap     | Q9R0P4 | Small acidic protein OS=Mus musculus OX=10090 GN=Smap PE=1 SV=1                                    | 0.826666667 |
| Cops7b   | Q8BV13 | COP9 signalosome complex subunit 7b OS=Mus musculus OX=10090 GN=Cops7b PE=1 SV=1                   | 0.733333333 |
| Ctsh     | P49935 | Pro-cathepsin H OS=Mus musculus OX=10090 GN=Ctsh PE=1 SV=2                                         | 0.723333333 |
| Psmg4    | P0C7N9 | Proteasome assembly chaperone 4 OS=Mus musculus OX=10090 GN=Psmg4 PE=1 SV=1                        | 0.676666667 |
| Slc7a5   | Q9Z127 | Large neutral amino acids transporter small subunit 1 OS=Mus musculus OX=10090 GN=Slc7a5 PE=1 SV=1 | 0.856666667 |
| Phf10    | Q9D8M7 | PHD finger protein 10 OS=Mus musculus OX=10090 GN=Phf10 PE=1 SV=4                                  | 0.716666667 |
| Nop10    | Q9CQS2 | H/ACA ribonucleoprotein complex subunit 3 OS=Mus musculus OX=10090 GN=Nop10 PE=3 SV=1              | 0.883333333 |
| Pqbp1    | Q91VJ5 | Polyglutamine-binding protein 1 OS=Mus musculus OX=10090 GN=Pqbp1 PE=1 SV=1                        | 0.836666667 |
| Rpl31    | P62900 | 60S ribosomal protein L31 OS=Mus musculus OX=10090 GN=Rpl31 PE=1 SV=1                              | 0.95        |
| Lin7c    | O88952 | Protein lin-7 homolog C OS=Mus musculus OX=10090 GN=Lin7c PE=1 SV=2                                | 1.036666667 |
| Shoc2    | O88520 | Leucine-rich repeat protein SHOC-2 OS=Mus musculus OX=10090 GN=Shoc2 PE=1 SV=2                     | 0.946666667 |
| Med4     | Q9CQA5 | Mediator of RNA polymerase II transcription subunit 4 OS=Mus musculus OX=10090 GN=Med4 PE=1 SV=1   | 1.046666667 |
| Vasn     | Q9CZT5 | Vasorin OS=Mus musculus OX=10090 GN=Vasn PE=2 SV=2                                                 | 1.036666667 |
| Ltv1     | Q6NSQ7 | Protein LTV1 homolog OS=Mus musculus OX=10090 GN=Ltv1 PE=1 SV=2                                    | 1.013333333 |
| Ube2q1   | Q7TSS2 | Ubiquitin-conjugating enzyme E2 Q1 OS=Mus musculus OX=10090 GN=Ube2q1 PE=1 SV=2                    | 0.826666667 |
| Adprhl2  | Q8CG72 | ADP-ribose glycohydrolase ARH3 OS=Mus musculus OX=10090 GN=Adprhl2 PE=1 SV=1                       | 1.456666667 |
| Riok2    | Q9CQS5 | Serine/threonine-protein kinase RIO2 OS=Mus musculus OX=10090 GN=Riok2 PE=1 SV=1                   | 0.716666667 |
| Nosip    | Q9D6T0 | Nitric oxide synthase-interacting protein OS=Mus musculus OX=10090 GN=Nosip PE=1 SV=1              | 0.913333333 |
| Cox5b    | P19536 | Cytochrome c oxidase subunit 5B mitochondrial OS=Mus musculus OX=10090 GN=Cox5b PE=1 SV=1          | 0.826666667 |
| Pdlim2   | Q8R1G6 | PDZ and LIM domain protein 2 OS=Mus musculus OX=10090 GN=Pdlim2 PE=1 SV=1                          | 0.77        |
| Atp5mg   | Q9CPQ8 | ATP synthase subunit g mitochondrial OS=Mus musculus OX=10090 GN=Atp5mg PE=1 SV=1                  | 0.886666667 |
| Naa30    | Q8CES0 | N-alpha-acetyltransferase 30 OS=Mus musculus OX=10090 GN=Naa30 PE=1 SV=2                           | 1.156666667 |
| Enoph1   | Q8BGB7 | Enolase-phosphatase E1 OS=Mus musculus OX=10090 GN=Enoph1 PE=1 SV=1                                | 1.386666667 |
| Fosl1    | P48755 | Fos-related antigen 1 OS=Mus musculus OX=10090 GN=Fosl1 PE=2 SV=2                                  | 0.81        |
| Nagk     | Q9QZ08 | N-acetyl-D-glucosamine kinase OS=Mus musculus OX=10090 GN=Nagk PE=1 SV=3                           | 0.963333333 |
| Ndufab1  | Q9CR21 | Acyl carrier protein mitochondrial OS=Mus musculus OX=10090 GN=Ndufab1 PE=1 SV=1                   | 0.88        |
| Frs2     | Q8C180 | Fibroblast growth factor receptor substrate 2 OS=Mus musculus OX=10090 GN=Frs2 PE=1 SV=3           | 0.663333333 |
| Ethe1    | Q9DCM0 | Persulfide dioxygenase ETHE1 mitochondrial OS=Mus musculus OX=10090 GN=Ethe1 PE=1 SV=2             | 0.94        |
| Irf3     | P70671 | Interferon regulatory factor 3 OS=Mus musculus OX=10090 GN=Irf3 PE=1 SV=1                          | 0.826666667 |
| N6amt1   | Q6SKR2 | Methyltransferase N6AMT1 OS=Mus musculus OX=10090 GN=N6amt1 PE=1 SV=1                              | 1.433333333 |
| Zdhhc20  | Q5Y5T1 | Palmitoyltransferase ZDHHC20 OS=Mus musculus OX=10090 GN=Zdhhc20 PE=1 SV=1                         | 0.79        |
| Gprc5a   | Q8BHL4 | Retinoic acid-induced protein 3 OS=Mus musculus OX=10090 GN=Gprc5a PE=1 SV=1                       | 0.856666667 |
| Arhgap10 | Q6Y5D8 | Rho GTPase-activating protein 10 OS=Mus musculus OX=10090 GN=Arhgap10 PE=1 SV=2                    | 1.17        |



|         |        |                                                                                              |             |
|---------|--------|----------------------------------------------------------------------------------------------|-------------|
| Ppil1   | Q9D0W5 | Peptidyl-prolyl cis-trans isomerase-like 1 OS=Mus musculus OX=10090 GN=Ppil1 PE=1 SV=1       | 0.883333333 |
| Ctbs    | Q8R242 | Di-N-acetylchitobiase OS=Mus musculus OX=10090 GN=Ctbs PE=1 SV=2                             | 0.763333333 |
| Timp1   | P12032 | Metalloproteinase inhibitor 1 OS=Mus musculus OX=10090 GN=Timp1 PE=1 SV=2                    | 0.97        |
| Vps37c  | Q8R105 | Vacuolar protein sorting-associated protein 37C OS=Mus musculus OX=10090 GN=Vps37c PE=1 SV=  | 0.896666667 |
| Fbln1   | Q08879 | Fibulin-1 OS=Mus musculus OX=10090 GN=Fbln1 PE=1 SV=2                                        | 0.326666667 |
| Tax1bp1 | Q3UKC1 | Tax1-binding protein 1 homolog OS=Mus musculus OX=10090 GN=Tax1bp1 PE=1 SV=2                 | 1.046666667 |
| Gpatch8 | A2A6A1 | G patch domain-containing protein 8 OS=Mus musculus OX=10090 GN=Gpatch8 PE=1 SV=1            | 0.823333333 |
| Chchd6  | Q91VN4 | MICOS complex subunit Mic25 OS=Mus musculus OX=10090 GN=Chchd6 PE=1 SV=2                     | 0.893333333 |
| Arhgef5 | E9Q7D5 | Rho guanine nucleotide exchange factor 5 OS=Mus musculus OX=10090 GN=Arhgef5 PE=1 SV=1       | 1           |
| Osbpl2  | Q8BX94 | Oxysterol-binding protein-related protein 2 OS=Mus musculus OX=10090 GN=Osbpl2 PE=1 SV=1     | 0.826666667 |
| Mff     | Q6PCP5 | Mitochondrial fission factor OS=Mus musculus OX=10090 GN=Mff PE=1 SV=1                       | 0.843333333 |
| Lsm3    | P62311 | U6 snRNA-associated Sm-like protein LSm3 OS=Mus musculus OX=10090 GN=Lsm3 PE=1 SV=2          | 0.92        |
| Kri1    | Q8VDQ9 | Protein KRI1 homolog OS=Mus musculus OX=10090 GN=Kri1 PE=1 SV=3                              | 0.716666667 |
|         | Q9D937 | Uncharacterized protein C11orf98 homolog OS=Mus musculus OX=10090 PE=1 SV=1                  | 0.883333333 |
| Rrp8    | Q9DB85 | Ribosomal RNA-processing protein 8 OS=Mus musculus OX=10090 GN=Rrp8 PE=1 SV=1                | 0.806666667 |
| Coq9    | Q8K1Z0 | Ubiquinone biosynthesis protein COQ9 mitochondrial OS=Mus musculus OX=10090 GN=Coq9 PE=      | 0.97        |
| Ccnl1   | Q52KE7 | Cyclin-L1 OS=Mus musculus OX=10090 GN=Ccnl1 PE=1 SV=1                                        | 0.803333333 |
| Dcxr    | Q91X52 | L-xylulose reductase OS=Mus musculus OX=10090 GN=Dcxr PE=1 SV=2                              | 0.9         |
| Ubl7    | Q91W67 | Ubiquitin-like protein 7 OS=Mus musculus OX=10090 GN=Ubl7 PE=1 SV=2                          | 0.98        |
| Rpf1    | Q7TND5 | Ribosome production factor 1 OS=Mus musculus OX=10090 GN=Rpf1 PE=2 SV=2                      | 0.956666667 |
| Mrps10  | Q80ZK0 | 28S ribosomal protein S10 mitochondrial OS=Mus musculus OX=10090 GN=Mrps10 PE=1 SV=1         | 1.356666667 |
| Galm    | Q8K157 | Galactose mutarotase OS=Mus musculus OX=10090 GN=Galm PE=1 SV=1                              | 1.153333333 |
| Ncbp3   | Q8BZR9 | Nuclear cap-binding protein subunit 3 OS=Mus musculus OX=10090 GN=Ncbp3 PE=1 SV=1            | 0.916666667 |
| Scfd2   | Q8BTY8 | Sec1 family domain-containing protein 2 OS=Mus musculus OX=10090 GN=Scfd2 PE=1 SV=1          | 1.126666667 |
| Dnajc25 | A2ALW5 | DnaJ homolog subfamily C member 25 OS=Mus musculus OX=10090 GN=Dnajc25 PE=1 SV=1             | 0.57        |
| Rbm4    | Q8C7Q4 | RNA-binding protein 4 OS=Mus musculus OX=10090 GN=Rbm4 PE=1 SV=1                             | 1.013333333 |
| Agpat4  | Q8K4X7 | 1-acyl-sn-glycerol-3-phosphate acyltransferase delta OS=Mus musculus OX=10090 GN=Agpat4 PE=1 | 0.843333333 |
| Ube2g1  | P62254 | Ubiquitin-conjugating enzyme E2 G1 OS=Mus musculus OX=10090 GN=Ube2g1 PE=1 SV=3              | 0.856666667 |
| Ccdc25  | Q78PG9 | Coiled-coil domain-containing protein 25 OS=Mus musculus OX=10090 GN=Ccdc25 PE=1 SV=1        | 0.846666667 |
| Ints9   | Q8K114 | Integrator complex subunit 9 OS=Mus musculus OX=10090 GN=Ints9 PE=1 SV=1                     | 0.793333333 |
| Srfbp1  | Q9CZ91 | Serum response factor-binding protein 1 OS=Mus musculus OX=10090 GN=Srfbp1 PE=1 SV=1         | 0.996666667 |
| Mepce   | Q8K3A9 | 7SK snRNA methylphosphate capping enzyme OS=Mus musculus OX=10090 GN=Mepce PE=1 SV=2         | 1.436666667 |
| Kif22   | Q3V300 | Kinesin-like protein KIF22 OS=Mus musculus OX=10090 GN=Kif22 PE=2 SV=2                       | 1.01        |
| Sdhc    | Q9CZB0 | Succinate dehydrogenase cytochrome b560 subunit mitochondrial OS=Mus musculus OX=10090 GN=   | 0.776666667 |

|         |        |                                                                                                  |             |
|---------|--------|--------------------------------------------------------------------------------------------------|-------------|
| Sh3glb2 | Q8R3V5 | Endophilin-B2 OS=Mus musculus OX=10090 GN=Sh3glb2 PE=1 SV=2                                      | 1.053333333 |
| Atp6v1d | P57746 | V-type proton ATPase subunit D OS=Mus musculus OX=10090 GN=Atp6v1d PE=1 SV=1                     | 1.053333333 |
| Trmt10a | Q8C1Z8 | tRNA methyltransferase 10 homolog A OS=Mus musculus OX=10090 GN=Trmt10a PE=2 SV=2                | 2.846666667 |
| Haus7   | Q8BKT8 | HAUS augmin-like complex subunit 7 OS=Mus musculus OX=10090 GN=Haus7 PE=1 SV=2                   | 0.906666667 |
| Cdipt   | Q8VDP6 | CDP-diacylglycerol--inositol 3-phosphatidyltransferase OS=Mus musculus OX=10090 GN=Cdipt PE=     | 0.746666667 |
| Dock5   | B2RY04 | Dedicator of cytokinesis protein 5 OS=Mus musculus OX=10090 GN=Dock5 PE=1 SV=2                   | 0.656666667 |
| Nsmce1  | Q9D720 | Non-structural maintenance of chromosomes element 1 homolog OS=Mus musculus OX=10090 GN          | 0.946666667 |
| Fxn     | O35943 | Frataxin mitochondrial OS=Mus musculus OX=10090 GN=Fxn PE=1 SV=1                                 | 0.906666667 |
| Fads3   | Q9JJE7 | Fatty acid desaturase 3 OS=Mus musculus OX=10090 GN=Fads3 PE=1 SV=2                              | 0.823333333 |
| Ube2f   | Q9CY34 | NEDD8-conjugating enzyme UBE2F OS=Mus musculus OX=10090 GN=Ube2f PE=1 SV=1                       | 0.58        |
| Cuedc2  | Q9CXX9 | CUE domain-containing protein 2 OS=Mus musculus OX=10090 GN=Cuedc2 PE=1 SV=1                     | 0.846666667 |
| Drap1   | Q9D6N5 | Dr1-associated corepressor OS=Mus musculus OX=10090 GN=Drap1 PE=1 SV=3                           | 0.96        |
| Ddx49   | Q4FZF3 | Probable ATP-dependent RNA helicase DDX49 OS=Mus musculus OX=10090 GN=Ddx49 PE=2 SV=1            | 0.74        |
| Tyw1    | Q8BJM7 | S-adenosyl-L-methionine-dependent tRNA 4-demethylwyosine synthase TYW1 OS=Mus musculus O         | 1.215       |
| Dlgap4  | B1AZP2 | Disks large-associated protein 4 OS=Mus musculus OX=10090 GN=Dlgap4 PE=1 SV=1                    | 0.903333333 |
| Srsf10  | Q9R0U0 | Serine/arginine-rich splicing factor 10 OS=Mus musculus OX=10090 GN=Srsf10 PE=1 SV=2             | 0.883333333 |
| Pde6d   | O55057 | Retinal rod rhodopsin-sensitive cGMP 3' 5'-cyclic phosphodiesterase subunit delta OS=Mus musculi | 0.963333333 |
| Cd99    | Q8VCN6 | CD99 antigen OS=Mus musculus OX=10090 GN=Cd99 PE=1 SV=1                                          | 0.81        |
| Mrps17  | Q9CQE3 | 28S ribosomal protein S17 mitochondrial OS=Mus musculus OX=10090 GN=Mrps17 PE=1 SV=1             | 0.973333333 |
| N4bp1   | Q6A037 | NEDD4-binding protein 1 OS=Mus musculus OX=10090 GN=N4bp1 PE=1 SV=2                              | 1.71        |
| Mrpl9   | Q99N94 | 39S ribosomal protein L9 mitochondrial OS=Mus musculus OX=10090 GN=Mrpl9 PE=1 SV=2               | 1.063333333 |
| Mxra8   | Q9DBV4 | Matrix remodeling-associated protein 8 OS=Mus musculus OX=10090 GN=Mxra8 PE=1 SV=1               | 1.036666667 |
| Trappc3 | O55013 | Trafficking protein particle complex subunit 3 OS=Mus musculus OX=10090 GN=Trappc3 PE=1 SV=1     | 0.93        |
| Custos  | Q3UY34 | Protein CUSTOS OS=Mus musculus OX=10090 GN=Custos PE=2 SV=1                                      | 0.703333333 |
| Prmt9   | Q3U3W5 | Protein arginine N-methyltransferase 9 OS=Mus musculus OX=10090 GN=Prmt9 PE=2 SV=2               | 2.7         |
| Bcap29  | Q61334 | B-cell receptor-associated protein 29 OS=Mus musculus OX=10090 GN=Bcap29 PE=1 SV=1               | 1.166666667 |
| Iah1    | Q9DB29 | Isoamyl acetate-hydrolyzing esterase 1 homolog OS=Mus musculus OX=10090 GN=Iah1 PE=1 SV=1        | 0.96        |
| Itih2   | Q61703 | Inter-alpha-trypsin inhibitor heavy chain H2 OS=Mus musculus OX=10090 GN=Itih2 PE=1 SV=1         | 0.146666667 |
| Cnot11  | Q9CWN7 | CCR4-NOT transcription complex subunit 11 OS=Mus musculus OX=10090 GN=Cnot11 PE=1 SV=1           | 0.73        |
| Mospd2  | Q9CWP6 | Motile sperm domain-containing protein 2 OS=Mus musculus OX=10090 GN=Mospd2 PE=1 SV=2            | 1.103333333 |
| Golt1b  | Q9CR60 | Vesicle transport protein GOT1B OS=Mus musculus OX=10090 GN=Golt1b PE=1 SV=1                     | 0.803333333 |
| Lonp2   | Q9DBN5 | Lon protease homolog 2 peroxisomal OS=Mus musculus OX=10090 GN=Lonp2 PE=1 SV=1                   | 0.673333333 |
| Cog8    | Q9JJA2 | Conserved oligomeric Golgi complex subunit 8 OS=Mus musculus OX=10090 GN=Cog8 PE=1 SV=3          | 0.766666667 |
| Nudt4   | Q8R2U6 | Diphosphoinositol polyphosphate phosphohydrolase 2 OS=Mus musculus OX=10090 GN=Nudt4 PE          | 0.813333333 |

|        |        |                                                                                                                       |             |
|--------|--------|-----------------------------------------------------------------------------------------------------------------------|-------------|
| Tut4   | B2RX14 | Terminal uridylyltransferase 4 OS=Mus musculus OX=10090 GN=Tut4 PE=1 SV=2                                             | 0.753333333 |
| Telo2  | Q9DC40 | Telomere length regulation protein TEL2 homolog OS=Mus musculus OX=10090 GN=Telo2 PE=1 SV=1                           | 1.023333333 |
| Cep41  | Q99NF3 | Centrosomal protein of 41 kDa OS=Mus musculus OX=10090 GN=Cep41 PE=1 SV=1                                             | 1.306666667 |
| Ptprk  | P35822 | Receptor-type tyrosine-protein phosphatase kappa OS=Mus musculus OX=10090 GN=Ptprk PE=1 SV=1                          | 0.786666667 |
| Cds2   | Q99L43 | Phosphatidate cytidylyltransferase 2 OS=Mus musculus OX=10090 GN=Cds2 PE=1 SV=1                                       | 0.83        |
| Nsmce2 | Q91VT1 | E3 SUMO-protein ligase NSE2 OS=Mus musculus OX=10090 GN=Nsmce2 PE=2 SV=1                                              | 0.84        |
| Atf7ip | Q7TT18 | Activating transcription factor 7-interacting protein 1 OS=Mus musculus OX=10090 GN=Atf7ip PE=1 SV=1                  | 0.623333333 |
| Ppif   | Q99KR7 | Peptidyl-prolyl cis-trans isomerase F mitochondrial OS=Mus musculus OX=10090 GN=Ppif PE=1 SV=1                        | 0.86        |
| Pole3  | Q9JKP7 | DNA polymerase epsilon subunit 3 OS=Mus musculus OX=10090 GN=Pole3 PE=1 SV=1                                          | 0.783333333 |
| Mrps26 | Q80ZS3 | 28S ribosomal protein S26 mitochondrial OS=Mus musculus OX=10090 GN=Mrps26 PE=1 SV=1                                  | 0.856666667 |
| Mrrf   | Q9D6S7 | Ribosome-recycling factor mitochondrial OS=Mus musculus OX=10090 GN=Mrrf PE=1 SV=1                                    | 0.826666667 |
| Tma16  | Q9CR02 | Translation machinery-associated protein 16 OS=Mus musculus OX=10090 GN=Tma16 PE=1 SV=1                               | 0.87        |
| Mtpap  | Q9D0D3 | Poly(A) RNA polymerase mitochondrial OS=Mus musculus OX=10090 GN=Mtpap PE=1 SV=1                                      | 1.993333333 |
| Myo6   | Q64331 | Unconventional myosin-VI OS=Mus musculus OX=10090 GN=Myo6 PE=1 SV=1                                                   | 1.043333333 |
| Cth    | Q8VCN5 | Cystathionine gamma-lyase OS=Mus musculus OX=10090 GN=Cth PE=1 SV=1                                                   | 0.856666667 |
| Mars2  | Q499X9 | Methionine--tRNA ligase mitochondrial OS=Mus musculus OX=10090 GN=Mars2 PE=1 SV=2                                     | 0.746666667 |
| Nol3   | Q9D1X0 | Nucleolar protein 3 OS=Mus musculus OX=10090 GN=Nol3 PE=1 SV=1                                                        | 1.04        |
| Nit1   | Q8VDK1 | Deaminated glutathione amidase OS=Mus musculus OX=10090 GN=Nit1 PE=1 SV=2                                             | 1.433333333 |
| Uhrf2  | Q7TMI3 | E3 ubiquitin-protein ligase UHRF2 OS=Mus musculus OX=10090 GN=Uhrf2 PE=1 SV=1                                         | 0.85        |
| Aida   | Q8C4Q6 | Axin interactor dorsalization-associated protein OS=Mus musculus OX=10090 GN=Aida PE=1 SV=1                           | 0.98        |
| Timm8b | P62077 | Mitochondrial import inner membrane translocase subunit Tim8 B OS=Mus musculus OX=10090 GN=Timm8b PE=1 SV=1           | 0.933333333 |
| Tdrd3  | Q91W18 | Tudor domain-containing protein 3 OS=Mus musculus OX=10090 GN=Tdrd3 PE=1 SV=4                                         | 1.123333333 |
| Mrpl40 | Q9Z2Q5 | 39S ribosomal protein L40 mitochondrial OS=Mus musculus OX=10090 GN=Mrpl40 PE=1 SV=2                                  | 0.863333333 |
| Fbxo6  | Q9QZN4 | F-box only protein 6 OS=Mus musculus OX=10090 GN=Fbxo6 PE=1 SV=1                                                      | 1.15        |
| Tspan6 | O70401 | Tetraspanin-6 OS=Mus musculus OX=10090 GN=Tspan6 PE=1 SV=1                                                            | 0.983333333 |
| Pdp1   | Q3UV70 | [Pyruvate dehydrogenase [acetyl-transferring]]-phosphatase 1 mitochondrial OS=Mus musculus OX=10090 GN=Pdp1 PE=1 SV=1 | 0.83        |
| Sp3    | O70494 | Transcription factor Sp3 OS=Mus musculus OX=10090 GN=Sp3 PE=1 SV=2                                                    | 0.91        |
| Rexo2  | Q9D8S4 | Oligoribonuclease mitochondrial OS=Mus musculus OX=10090 GN=Rexo2 PE=1 SV=2                                           | 1.14        |
| Crif3  | Q9Z2L7 | Cytokine receptor-like factor 3 OS=Mus musculus OX=10090 GN=Crif3 PE=1 SV=1                                           | 0.9         |
| Med10  | Q9CXU0 | Mediator of RNA polymerase II transcription subunit 10 OS=Mus musculus OX=10090 GN=Med10 PE=1 SV=1                    | 0.83        |
| Suox   | Q8R086 | Sulfite oxidase mitochondrial OS=Mus musculus OX=10090 GN=Suox PE=1 SV=2                                              | 0.983333333 |
| Rangrf | Q9JIB0 | Ran guanine nucleotide release factor OS=Mus musculus OX=10090 GN=Rangrf PE=1 SV=1                                    | 0.913333333 |
|        | Q8C5K5 | Uncharacterized protein CXorf38 homolog OS=Mus musculus OX=10090 GN=Q8C5K5 PE=1 SV=1                                  | 1           |
| Ntpcr  | Q9CQA9 | Cancer-related nucleoside-triphosphatase homolog OS=Mus musculus OX=10090 GN=Ntpcr PE=1 SV=1                          | 0.916666667 |

|         |        |                                                                                             |             |
|---------|--------|---------------------------------------------------------------------------------------------|-------------|
| Nubp2   | Q9R061 | Cytosolic Fe-S cluster assembly factor NUBP2 OS=Mus musculus OX=10090 GN=Nubp2 PE=1 SV=1    | 0.92        |
| Fzd2    | Q9JIP6 | Frizzled-2 OS=Mus musculus OX=10090 GN=Fzd2 PE=2 SV=1                                       | 0.783333333 |
| Naa20   | P61600 | N-alpha-acetyltransferase 20 OS=Mus musculus OX=10090 GN=Naa20 PE=1 SV=1                    | 0.88        |
| Vti1b   | O88384 | Vesicle transport through interaction with t-SNAREs homolog 1B OS=Mus musculus OX=10090 GN= | 1.02        |
| Ttc4    | Q8R3H9 | Tetratricopeptide repeat protein 4 OS=Mus musculus OX=10090 GN=Ttc4 PE=1 SV=1               | 1.183333333 |
| Cxcl12  | P40224 | Stromal cell-derived factor 1 OS=Mus musculus OX=10090 GN=Cxcl12 PE=2 SV=2                  | 0.88        |
| Mrpl53  | Q9D1H8 | 39S ribosomal protein L53 mitochondrial OS=Mus musculus OX=10090 GN=Mrpl53 PE=1 SV=1        | 1           |
| Gpn1    | Q8VCE2 | GPN-loop GTPase 1 OS=Mus musculus OX=10090 GN=Gpn1 PE=1 SV=1                                | 0.97        |
| Ndufb11 | O09111 | NADH dehydrogenase [ubiquinone] 1 beta subcomplex subunit 11 mitochondrial OS=Mus musculu   | 0.913333333 |
| Ndufb9  | Q9CQJ8 | NADH dehydrogenase [ubiquinone] 1 beta subcomplex subunit 9 OS=Mus musculus OX=10090 GN=    | 0.886666667 |
| Rab24   | P35290 | Ras-related protein Rab-24 OS=Mus musculus OX=10090 GN=Rab24 PE=1 SV=2                      | 0.813333333 |
| Mgmt    | P26187 | Methylated-DNA--protein-cysteine methyltransferase OS=Mus musculus OX=10090 GN=Mgmt PE=1    | 0.476666667 |
| Brk1    | Q91VR8 | Protein BRICK1 OS=Mus musculus OX=10090 GN=Brk1 PE=1 SV=1                                   | 0.9         |
| DIk1    | Q09163 | Protein delta homolog 1 OS=Mus musculus OX=10090 GN=DIk1 PE=1 SV=1                          | 0.733333333 |
| Ly6c1   | P0CW02 | Lymphocyte antigen 6C1 OS=Mus musculus OX=10090 GN=Ly6c1 PE=2 SV=1                          | 0.826666667 |
| Ndufa5  | Q9CPP6 | NADH dehydrogenase [ubiquinone] 1 alpha subcomplex subunit 5 OS=Mus musculus OX=10090 GN    | 0.85        |
| Tmem173 | Q3TBT3 | Stimulator of interferon genes protein OS=Mus musculus OX=10090 GN=Sting1 PE=1 SV=2         |             |
| Mtco1   | P00397 | Cytochrome c oxidase subunit 1 OS=Mus musculus OX=10090 GN=Mtco1 PE=1 SV=2                  | 0.716666667 |
| Rbm5    | Q91YE7 | RNA-binding protein 5 OS=Mus musculus OX=10090 GN=Rbm5 PE=1 SV=1                            | 0.736666667 |
| Smc6    | Q924W5 | Structural maintenance of chromosomes protein 6 OS=Mus musculus OX=10090 GN=Smc6 PE=1 SV    | 1.033333333 |
| Sdcbp   | O08992 | Syntenin-1 OS=Mus musculus OX=10090 GN=Sdcbp PE=1 SV=1                                      | 4.91        |
| Rfk     | Q8CFV9 | Riboflavin kinase OS=Mus musculus OX=10090 GN=Rfk PE=1 SV=2                                 | 0.663333333 |
| Fastkd2 | Q922E6 | FAST kinase domain-containing protein 2 mitochondrial OS=Mus musculus OX=10090 GN=Fastkd2   | 0.98        |
| Acox1   | Q9R0H0 | Peroxisomal acyl-coenzyme A oxidase 1 OS=Mus musculus OX=10090 GN=Acox1 PE=1 SV=5           | 0.813333333 |
| Rars2   | Q3U186 | Probable arginine--tRNA ligase mitochondrial OS=Mus musculus OX=10090 GN=Rars2 PE=1 SV=1    | 0.963333333 |
| Polr1e  | Q8K202 | DNA-directed RNA polymerase I subunit RPA49 OS=Mus musculus OX=10090 GN=Polr1e PE=1 SV=2    | 1.043333333 |
| Spryd4  | Q91WK1 | SPRY domain-containing protein 4 OS=Mus musculus OX=10090 GN=Spryd4 PE=1 SV=1               | 1.113333333 |
| Mpc2    | Q9D023 | Mitochondrial pyruvate carrier 2 OS=Mus musculus OX=10090 GN=Mpc2 PE=1 SV=1                 | 0.813333333 |
| Czib    | Q8BHG2 | CXXC motif containing zinc binding protein OS=Mus musculus OX=10090 GN=Czib PE=1 SV=1       | 0.973333333 |
| Cybc1   | Q3TYS2 | Cytochrome b-245 chaperone 1 OS=Mus musculus OX=10090 GN=Cybc1 PE=1 SV=2                    | 0.803333333 |
| Pex14   | Q9R0A0 | Peroxisomal membrane protein PEX14 OS=Mus musculus OX=10090 GN=Pex14 PE=1 SV=1              | 0.93        |
| Vars2   | Q3U2A8 | Valine--tRNA ligase mitochondrial OS=Mus musculus OX=10090 GN=Vars2 PE=1 SV=2               | 1.75        |
| Psmg2   | Q9EST4 | Proteasome assembly chaperone 2 OS=Mus musculus OX=10090 GN=Psmg2 PE=1 SV=1                 | 1.05        |
| Col12a1 | Q60847 | Collagen alpha-1(XII) chain OS=Mus musculus OX=10090 GN=Col12a1 PE=2 SV=3                   | 10.44666667 |

|          |        |                                                                                                       |             |
|----------|--------|-------------------------------------------------------------------------------------------------------|-------------|
| Ttc21b   | Q0HA38 | Tetratricopeptide repeat protein 21B OS=Mus musculus OX=10090 GN=Ttc21b PE=1 SV=1                     | 1.643333333 |
| Chmp3    | Q9CQ10 | Charged multivesicular body protein 3 OS=Mus musculus OX=10090 GN=Chmp3 PE=1 SV=3                     | 0.966666667 |
| Xpo6     | Q924Z6 | Exportin-6 OS=Mus musculus OX=10090 GN=Xpo6 PE=1 SV=2                                                 | 0.853333333 |
| Armc1    | Q9D7A8 | Armadillo repeat-containing protein 1 OS=Mus musculus OX=10090 GN=Armc1 PE=1 SV=1                     | 2.026666667 |
| Tspo     | P50637 | Translocator protein OS=Mus musculus OX=10090 GN=Tspo PE=1 SV=1                                       | 0.78        |
| Focad    | A2AKG8 | Focadhesin OS=Mus musculus OX=10090 GN=Focad PE=1 SV=1                                                | 1.61        |
| Tmed3    | Q78IS1 | Transmembrane emp24 domain-containing protein 3 OS=Mus musculus OX=10090 GN=Tmed3 PE=                 | 0.76        |
| Cyb5r1   | Q9DB73 | NADH-cytochrome b5 reductase 1 OS=Mus musculus OX=10090 GN=Cyb5r1 PE=1 SV=1                           | 0.89        |
| Psmf1    | Q8BHL8 | Proteasome inhibitor PI31 subunit OS=Mus musculus OX=10090 GN=Psmf1 PE=1 SV=1                         | 0.763333333 |
| Slc38a10 | Q5I012 | Putative sodium-coupled neutral amino acid transporter 10 OS=Mus musculus OX=10090 GN=Slc38a10        | 0.97        |
| Ndufb5   | Q9CQH3 | NADH dehydrogenase [ubiquinone] 1 beta subcomplex subunit 5 mitochondrial OS=Mus musculus             | 0.993333333 |
| Itm2b    | O89051 | Integral membrane protein 2B OS=Mus musculus OX=10090 GN=Itm2b PE=1 SV=1                              | 1.076666667 |
| Mrpl3    | Q99N95 | 39S ribosomal protein L3 mitochondrial OS=Mus musculus OX=10090 GN=Mrpl3 PE=1 SV=1                    | 1.263333333 |
| Tmed1    | Q3V009 | Transmembrane emp24 domain-containing protein 1 OS=Mus musculus OX=10090 GN=Tmed1 PE=                 | 0.91        |
| Ubap1    | Q8BH48 | Ubiquitin-associated protein 1 OS=Mus musculus OX=10090 GN=Ubap1 PE=1 SV=1                            | 1.246666667 |
| Mrpl2    | Q9D773 | 39S ribosomal protein L2 mitochondrial OS=Mus musculus OX=10090 GN=Mrpl2 PE=1 SV=1                    | 0.836666667 |
| Nkrf     | Q8BY02 | NF-kappa-B-repressing factor OS=Mus musculus OX=10090 GN=Nkrf PE=2 SV=3                               | 1.11        |
| Cav2     | Q9WVC3 | Caveolin-2 OS=Mus musculus OX=10090 GN=Cav2 PE=1 SV=1                                                 | 1.026666667 |
| Mrpl16   | Q99N93 | 39S ribosomal protein L16 mitochondrial OS=Mus musculus OX=10090 GN=Mrpl16 PE=1 SV=1                  | 0.886666667 |
| Nsa2     | Q9CR47 | Ribosome biogenesis protein NSA2 homolog OS=Mus musculus OX=10090 GN=Nsa2 PE=2 SV=1                   | 0.93        |
| Dctpp1   | Q9QY93 | dCTP pyrophosphatase 1 OS=Mus musculus OX=10090 GN=Dctpp1 PE=1 SV=1                                   | 0.926666667 |
| Ube2s    | Q921J4 | Ubiquitin-conjugating enzyme E2 S OS=Mus musculus OX=10090 GN=Ube2s PE=1 SV=1                         | 1.01        |
| Foxc1    | Q61572 | Forkhead box protein C1 OS=Mus musculus OX=10090 GN=Foxc1 PE=1 SV=3                                   | 0.966666667 |
| Trappc5  | Q9CQA1 | Trafficking protein particle complex subunit 5 OS=Mus musculus OX=10090 GN=Trappc5 PE=1 SV=1          | 1.333333333 |
| Rngtt    | O55236 | mRNA-capping enzyme OS=Mus musculus OX=10090 GN=Rngtt PE=1 SV=1                                       | 1.026666667 |
| Eps8l2   | Q99K30 | Epidermal growth factor receptor kinase substrate 8-like protein 2 OS=Mus musculus OX=10090 GN=Eps8l2 | 0.793333333 |
| Mrpl10   | Q3TBW2 | 39S ribosomal protein L10 mitochondrial OS=Mus musculus OX=10090 GN=Mrpl10 PE=1 SV=2                  | 1.18        |
| Pop4     | Q9CR08 | Ribonuclease P protein subunit p29 OS=Mus musculus OX=10090 GN=Pop4 PE=2 SV=1                         | 0.92        |
| Znf593   | Q9DB42 | Zinc finger protein 593 OS=Mus musculus OX=10090 GN=Znf593 PE=1 SV=2                                  | 1.5         |
| Eif1ad   | Q3THJ3 | Probable RNA-binding protein EIF1AD OS=Mus musculus OX=10090 GN=Eif1ad PE=1 SV=2                      | 0.84        |
| R3hcc1   | Q8BSI6 | R3H and coiled-coil domain-containing protein 1 OS=Mus musculus OX=10090 GN=R3hcc1 PE=1 SV=1          | 1.136666667 |
| Kdm5c    | P41230 | Lysine-specific demethylase 5C OS=Mus musculus OX=10090 GN=Kdm5c PE=1 SV=4                            | 1.253333333 |
| Setd1a   | E9PYH6 | Histone-lysine N-methyltransferase SETD1A OS=Mus musculus OX=10090 GN=Setd1a PE=1 SV=1                | 0.636666667 |
| Slc27a4  | Q91VE0 | Long-chain fatty acid transport protein 4 OS=Mus musculus OX=10090 GN=Slc27a4 PE=1 SV=1               | 0.84        |



|          |        |                                                                                                                  |             |
|----------|--------|------------------------------------------------------------------------------------------------------------------|-------------|
| Homer3   | Q99JP6 | Homer protein homolog 3 OS=Mus musculus OX=10090 GN=Homer3 PE=1 SV=2                                             | 0.945       |
| Nt5dc1   | Q8C5P5 | 5'-nucleotidase domain-containing protein 1 OS=Mus musculus OX=10090 GN=Nt5dc1 PE=1 SV=2                         | 1.01        |
| Ndufs8   | Q8K3J1 | NADH dehydrogenase [ubiquinone] iron-sulfur protein 8 mitochondrial OS=Mus musculus OX=10090 GN=Ndufs8 PE=1 SV=1 | 0.823333333 |
| Nfx1     | B1AY10 | Transcriptional repressor NF-X1 OS=Mus musculus OX=10090 GN=Nfx1 PE=1 SV=1                                       | 1.18        |
| Fam136a  | Q9CR98 | Protein FAM136A OS=Mus musculus OX=10090 GN=Fam136a PE=1 SV=1                                                    | 0.966666667 |
| Sdc1     | P18828 | Syndecan-1 OS=Mus musculus OX=10090 GN=Sdc1 PE=1 SV=1                                                            | 0.693333333 |
| Ccn2     | P29268 | CCN family member 2 OS=Mus musculus OX=10090 GN=Ccn2 PE=2 SV=3                                                   | 0.956666667 |
| Tbpl1    | P62340 | TATA box-binding protein-like 1 OS=Mus musculus OX=10090 GN=Tbpl1 PE=1 SV=1                                      | 1.226666667 |
| Islr     | Q6GU68 | Immunoglobulin superfamily containing leucine-rich repeat protein OS=Mus musculus OX=10090 GN=Islr PE=1 SV=1     | 0.68        |
| Tigar    | Q8BZA9 | Fructose-2,6-bisphosphatase TIGAR OS=Mus musculus OX=10090 GN=Tigar PE=1 SV=1                                    | 0.773333333 |
| Smtn     | Q921U8 | Smoothelin OS=Mus musculus OX=10090 GN=Smtn PE=1 SV=2                                                            | 1.103333333 |
| Gle1     | Q8R322 | Nucleoporin GLE1 OS=Mus musculus OX=10090 GN=Gle1 PE=1 SV=2                                                      | 0.88        |
| Rab3ip   | Q68EF0 | Rab-3A-interacting protein OS=Mus musculus OX=10090 GN=Rab3ip PE=1 SV=1                                          | 0.79        |
| Tfpi     | O54819 | Tissue factor pathway inhibitor OS=Mus musculus OX=10090 GN=Tfpi PE=2 SV=1                                       | 1.946666667 |
| Stx18    | Q8VDS8 | Syntaxin-18 OS=Mus musculus OX=10090 GN=Stx18 PE=1 SV=2                                                          | 0.783333333 |
| Tacc2    | Q9JJG0 | Transforming acidic coiled-coil-containing protein 2 OS=Mus musculus OX=10090 GN=Tacc2 PE=1 SV=1                 | 0.543333333 |
| Coil     | Q5SU73 | Coilin OS=Mus musculus OX=10090 GN=Coil PE=1 SV=1                                                                | 1.066666667 |
| Dnajc1   | Q61712 | DnaJ homolog subfamily C member 1 OS=Mus musculus OX=10090 GN=Dnajc1 PE=1 SV=1                                   | 1.696666667 |
| Fundc2   | Q9D6K8 | FUN14 domain-containing protein 2 OS=Mus musculus OX=10090 GN=Fundc2 PE=1 SV=1                                   | 0.786666667 |
| Itsn2    | Q9Z0R6 | Intersectin-2 OS=Mus musculus OX=10090 GN=Itsn2 PE=1 SV=2                                                        | 1.066666667 |
| Ak6      | Q8VCP8 | Adenylate kinase isoenzyme 6 OS=Mus musculus OX=10090 GN=Ak6 PE=1 SV=1                                           | 1.163333333 |
| Kat7     | Q5SVQ0 | Histone acetyltransferase KAT7 OS=Mus musculus OX=10090 GN=Kat7 PE=1 SV=1                                        | 1.016666667 |
| Cep131   | Q62036 | Centrosomal protein of 131 kDa OS=Mus musculus OX=10090 GN=Cep131 PE=1 SV=2                                      | 0.836666667 |
| Atp11c   | Q9QZW0 | Phospholipid-transporting ATPase 11C OS=Mus musculus OX=10090 GN=Atp11c PE=1 SV=2                                | 1.1         |
| Dnajb6   | O54946 | DnaJ homolog subfamily B member 6 OS=Mus musculus OX=10090 GN=Dnajb6 PE=1 SV=4                                   | 0.97        |
| Ctif     | Q6PEE2 | CBP80/20-dependent translation initiation factor OS=Mus musculus OX=10090 GN=Ctif PE=1 SV=2                      | 1.25        |
| Ccs      | Q9WU84 | Copper chaperone for superoxide dismutase OS=Mus musculus OX=10090 GN=Ccs PE=1 SV=1                              | 1.126666667 |
| Cmss1    | Q9CZT6 | Protein CMSS1 OS=Mus musculus OX=10090 GN=Cmss1 PE=2 SV=1                                                        | 1.693333333 |
| Paxbp1   | P58501 | PAX3- and PAX7-binding protein 1 OS=Mus musculus OX=10090 GN=Paxbp1 PE=1 SV=3                                    | 0.736666667 |
| Ptrhd1   | D3Z4S3 | Putative peptidyl-tRNA hydrolase PTRHD1 OS=Mus musculus OX=10090 GN=Ptrhd1 PE=1 SV=1                             | 0.62        |
| Dnttip1  | Q99LB0 | Deoxynucleotidyltransferase terminal-interacting protein 1 OS=Mus musculus OX=10090 GN=Dnttip1 PE=1 SV=1         | 0.923333333 |
| Supt4h1b | Q9Z199 | Transcription elongation factor SPT4-B OS=Mus musculus OX=10090 GN=Supt4h1b PE=2 SV=1                            | 0.89        |
| Supt4h1a | P63271 | Transcription elongation factor SPT4-A OS=Mus musculus OX=10090 GN=Supt4h1a PE=2 SV=1                            | 0.89        |
| Twistnb  | Q78WZ7 | DNA-directed RNA polymerase I subunit RPA43 OS=Mus musculus OX=10090 GN=Polr1f PE=1 SV=1                         | 0.686666667 |

|          |        |                                                                                                    |             |
|----------|--------|----------------------------------------------------------------------------------------------------|-------------|
| Wdfy3    | Q6VNB8 | WD repeat and FYVE domain-containing protein 3 OS=Mus musculus OX=10090 GN=Wdfy3 PE=1 SV=1         | 1.915       |
| Katnb1   | Q8BG40 | Katanin p80 WD40 repeat-containing subunit B1 OS=Mus musculus OX=10090 GN=Katnb1 PE=1 SV=1         | 1.086666667 |
| Gsta4    | P24472 | Glutathione S-transferase A4 OS=Mus musculus OX=10090 GN=Gsta4 PE=1 SV=3                           | 0.633333333 |
| Snap29   | Q9ERB0 | Synaptosomal-associated protein 29 OS=Mus musculus OX=10090 GN=Snap29 PE=1 SV=1                    | 0.993333333 |
| Pld3     | O35405 | 5'-3' exonuclease PLD3 OS=Mus musculus OX=10090 GN=Pld3 PE=1 SV=1                                  | 0.77        |
| Trpc4ap  | Q9JLV2 | Short transient receptor potential channel 4-associated protein OS=Mus musculus OX=10090 GN=T      | 0.81        |
| Dus2     | Q9D7B1 | tRNA-dihydrouridine(20) synthase [NAD(P)+]-like OS=Mus musculus OX=10090 GN=Dus2 PE=1 SV=1         | 0.923333333 |
| Stx4     | P70452 | Syntaxin-4 OS=Mus musculus OX=10090 GN=Stx4 PE=1 SV=1                                              | 0.936666667 |
| Chmp7    | Q8R1T1 | Charged multivesicular body protein 7 OS=Mus musculus OX=10090 GN=Chmp7 PE=1 SV=1                  | 0.726666667 |
| Sestd1   | Q80UK0 | SEC14 domain and spectrin repeat-containing protein 1 OS=Mus musculus OX=10090 GN=Sestd1 PE=1 SV=1 | 0.806666667 |
| Ocrl     | Q6NVF0 | Inositol polyphosphate 5-phosphatase OCRL OS=Mus musculus OX=10090 GN=Ocrl PE=1 SV=1               | 0.813333333 |
| Ak5      | Q920P5 | Adenylate kinase isoenzyme 5 OS=Mus musculus OX=10090 GN=Ak5 PE=1 SV=2                             | 1.07        |
| Smug1    | Q6P5C5 | Single-strand selective monofunctional uracil DNA glycosylase OS=Mus musculus OX=10090 GN=Sm       | 1.776666667 |
| Erap1    | Q9EQH2 | Endoplasmic reticulum aminopeptidase 1 OS=Mus musculus OX=10090 GN=Erap1 PE=1 SV=2                 | 0.976666667 |
| Polb     | Q8K409 | DNA polymerase beta OS=Mus musculus OX=10090 GN=Polb PE=1 SV=3                                     | 0.643333333 |
| Map6     | Q7TSJ2 | Microtubule-associated protein 6 OS=Mus musculus OX=10090 GN=Map6 PE=1 SV=2                        | 1.29        |
| Tank     | P70347 | TRAF family member-associated NF-kappa-B activator OS=Mus musculus OX=10090 GN=Tank PE=1 SV=1      | 1.403333333 |
| Apoo     | Q9DCZ4 | MICOS complex subunit Mic26 OS=Mus musculus OX=10090 GN=Apoo PE=1 SV=2                             | 1.053333333 |
| Oxa1l    | Q8BGA9 | Mitochondrial inner membrane protein OXA1L OS=Mus musculus OX=10090 GN=Oxa1l PE=1 SV=1             | 0.836666667 |
| Ankrd52  | Q8BTI7 | Serine/threonine-protein phosphatase 6 regulatory ankyrin repeat subunit C OS=Mus musculus OX=     | 1.215       |
| Serinc1  | Q9QZ18 | Serine incorporator 1 OS=Mus musculus OX=10090 GN=Serinc1 PE=1 SV=1                                | 1.233333333 |
| Stim1    | P70302 | Stromal interaction molecule 1 OS=Mus musculus OX=10090 GN=Stim1 PE=1 SV=2                         | 1.593333333 |
| Tpd52    | Q62393 | Tumor protein D52 OS=Mus musculus OX=10090 GN=Tpd52 PE=1 SV=2                                      | 2.096666667 |
| Uqcc1    | Q9CWU6 | Ubiquinol-cytochrome-c reductase complex assembly factor 1 OS=Mus musculus OX=10090 GN=Uq          | 0.753333333 |
| Abraxas2 | Q3TCJ1 | BRISC complex subunit Abraxas 2 OS=Mus musculus OX=10090 GN=Abraxas2 PE=1 SV=1                     | 0.843333333 |
| Lsm6     | P62313 | U6 snRNA-associated Sm-like protein LSM6 OS=Mus musculus OX=10090 GN=Lsm6 PE=1 SV=1                | 1.426666667 |
| Fkbp5    | Q64378 | Peptidyl-prolyl cis-trans isomerase FKBP5 OS=Mus musculus OX=10090 GN=Fkbp5 PE=1 SV=1              | 0.93        |
| Dnajc11  | Q5U458 | DnaJ homolog subfamily C member 11 OS=Mus musculus OX=10090 GN=Dnajc11 PE=1 SV=2                   | 0.843333333 |
| Ighmbp2  | P40694 | DNA-binding protein SMUBP-2 OS=Mus musculus OX=10090 GN=Ighmbp2 PE=1 SV=1                          | 0.945       |
| Wbp2     | P97765 | WW domain-binding protein 2 OS=Mus musculus OX=10090 GN=Wbp2 PE=1 SV=1                             | 0.926666667 |
| Gcfc2    | Q8BKT3 | GC-rich sequence DNA-binding factor 2 OS=Mus musculus OX=10090 GN=Gcfc2 PE=1 SV=2                  | 0.68        |
| Efhd2    | Q9D8Y0 | EF-hand domain-containing protein D2 OS=Mus musculus OX=10090 GN=Efhd2 PE=1 SV=1                   | 0.733333333 |
| Slc1a5   | P51912 | Neutral amino acid transporter B(0) OS=Mus musculus OX=10090 GN=Slc1a5 PE=1 SV=2                   | 1.076666667 |
| Mrpl47   | Q8K2Y7 | 39S ribosomal protein L47 mitochondrial OS=Mus musculus OX=10090 GN=Mrpl47 PE=1 SV=2               | 1.003333333 |

|         |        |                                                                                              |             |
|---------|--------|----------------------------------------------------------------------------------------------|-------------|
| Serhl   | Q9EPB5 | Serine hydrolase-like protein OS=Mus musculus OX=10090 GN=Serhl PE=1 SV=1                    | 0.623333333 |
| Rmdn3   | Q3UJU9 | Regulator of microtubule dynamics protein 3 OS=Mus musculus OX=10090 GN=Rmdn3 PE=1 SV=2      | 0.833333333 |
| Usp40   | Q8BWR4 | Ubiquitin carboxyl-terminal hydrolase 40 OS=Mus musculus OX=10090 GN=Usp40 PE=1 SV=2         | 0.93        |
| Pelo    | Q80X73 | Protein pelota homolog OS=Mus musculus OX=10090 GN=Pelo PE=1 SV=3                            | 2.02        |
| Wdr7    | Q920I9 | WD repeat-containing protein 7 OS=Mus musculus OX=10090 GN=Wdr7 PE=1 SV=3                    | 0.6         |
| Mrps28  | Q9CY16 | 28S ribosomal protein S28 mitochondrial OS=Mus musculus OX=10090 GN=Mrps28 PE=1 SV=1         | 0.773333333 |
| Rpl35   | Q6ZWV7 | 60S ribosomal protein L35 OS=Mus musculus OX=10090 GN=Rpl35 PE=1 SV=1                        | 0.94        |
| Bak1    | O08734 | Bcl-2 homologous antagonist/killer OS=Mus musculus OX=10090 GN=Bak1 PE=1 SV=3                | 1.016666667 |
| Use1    | Q9CQ56 | Vesicle transport protein USE1 OS=Mus musculus OX=10090 GN=Use1 PE=1 SV=1                    | 1.473333333 |
| Tefm    | Q5SSK3 | Transcription elongation factor mitochondrial OS=Mus musculus OX=10090 GN=Tefm PE=1 SV=1     | 0.85        |
| Ankzf1  | Q80UU1 | Ankyrin repeat and zinc finger domain-containing protein 1 OS=Mus musculus OX=10090 GN=Ankzf | 1.153333333 |
| Neo1    | P97798 | Neogenin OS=Mus musculus OX=10090 GN=Neo1 PE=1 SV=1                                          | 1.57        |
| Sgce    | O70258 | Epsilon-sarcoglycan OS=Mus musculus OX=10090 GN=Sgce PE=1 SV=2                               | 1.095       |
| Gnb4    | P29387 | Guanine nucleotide-binding protein subunit beta-4 OS=Mus musculus OX=10090 GN=Gnb4 PE=1 SV=1 | 0.64        |
| Fmnl2   | A2APV2 | Formin-like protein 2 OS=Mus musculus OX=10090 GN=Fmnl2 PE=1 SV=2                            | 3.295       |
| Akt3    | Q9WUA6 | RAC-gamma serine/threonine-protein kinase OS=Mus musculus OX=10090 GN=Akt3 PE=1 SV=1         |             |
| Ube2e3  | P52483 | Ubiquitin-conjugating enzyme E2 E3 OS=Mus musculus OX=10090 GN=Ube2e3 PE=1 SV=2              | 1.015       |
| Braf    | P28028 | Serine/threonine-protein kinase B-raf OS=Mus musculus OX=10090 GN=Braf PE=1 SV=3             | 1.806666667 |
| Mcts2   | Q9CQ21 | Malignant T-cell-amplified sequence 2 OS=Mus musculus OX=10090 GN=Mcts2 PE=1 SV=1            | 0.98        |
| Rhob    | P62746 | Rho-related GTP-binding protein RhoB OS=Mus musculus OX=10090 GN=Rhob PE=1 SV=1              | 1.563333333 |
| Rap2b   | P61226 | Ras-related protein Rap-2b OS=Mus musculus OX=10090 GN=Rap2b PE=1 SV=1                       | 0.876666667 |
| Nek6    | Q9ES70 | Serine/threonine-protein kinase Nek6 OS=Mus musculus OX=10090 GN=Nek6 PE=1 SV=1              | 0.786666667 |
| Sec61a2 | Q9JLR1 | Protein transport protein Sec61 subunit alpha isoform 2 OS=Mus musculus OX=10090 GN=Sec61a2  | 1.106666667 |
| Scd2    | P13011 | Stearoyl-CoA desaturase 2 OS=Mus musculus OX=10090 GN=Scd2 PE=1 SV=2                         | 0.683333333 |
| Dcun1d1 | Q9QZ73 | DCN1-like protein 1 OS=Mus musculus OX=10090 GN=Dcun1d1 PE=2 SV=1                            | 0.956666667 |
| Dysf    | Q9ESD7 | Dysferlin OS=Mus musculus OX=10090 GN=Dysf PE=1 SV=3                                         | 2.465       |
| Rab4b   | Q91ZR1 | Ras-related protein Rab-4B OS=Mus musculus OX=10090 GN=Rab4b PE=1 SV=2                       | 1.436666667 |
| Insr    | P15208 | Insulin receptor OS=Mus musculus OX=10090 GN=Insr PE=1 SV=2                                  | 1.816666667 |
| Rab22a  | P35285 | Ras-related protein Rab-22A OS=Mus musculus OX=10090 GN=Rab22a PE=1 SV=2                     | 0.876666667 |
| Cdk17   | Q8K0D0 | Cyclin-dependent kinase 17 OS=Mus musculus OX=10090 GN=Cdk17 PE=1 SV=2                       | 0.88        |
| Scaf8   | Q6DID3 | SR-related and CTD-associated factor 8 OS=Mus musculus OX=10090 GN=Scaf8 PE=1 SV=1           | 0.926666667 |
| Cdk12   | Q14AX6 | Cyclin-dependent kinase 12 OS=Mus musculus OX=10090 GN=Cdk12 PE=1 SV=2                       | 1.483333333 |
| Grem1   | O70326 | Gremlin-1 OS=Mus musculus OX=10090 GN=Grem1 PE=2 SV=1                                        | 0.986666667 |
| Rpe     | Q8VEEO | Ribulose-phosphate 3-epimerase OS=Mus musculus OX=10090 GN=Rpe PE=1 SV=1                     | 0.993333333 |

|           |        |                                                                                                                               |             |
|-----------|--------|-------------------------------------------------------------------------------------------------------------------------------|-------------|
| Pcbp4     | P57724 | Poly(rC)-binding protein 4 OS=Mus musculus OX=10090 GN=Pcbp4 PE=1 SV=1                                                        | 0.893333333 |
| Ptbp2     | Q91Z31 | Polypyrimidine tract-binding protein 2 OS=Mus musculus OX=10090 GN=Ptbp2 PE=1 SV=2                                            | 1.12        |
| Hdac3     | O88895 | Histone deacetylase 3 OS=Mus musculus OX=10090 GN=Hdac3 PE=1 SV=1                                                             | 1.003333333 |
| Tead1     | P30051 | Transcriptional enhancer factor TEF-1 OS=Mus musculus OX=10090 GN=Tead1 PE=1 SV=2                                             | 0.606666667 |
| Armc10    | Q9D0L7 | Armadillo repeat-containing protein 10 OS=Mus musculus OX=10090 GN=Armc10 PE=1 SV=1                                           | 1.123333333 |
| Samd4a    | Q8CBY1 | Protein Smaug homolog 1 OS=Mus musculus OX=10090 GN=Samd4a PE=1 SV=2                                                          | 0.746666667 |
| Ppp2r5a   | Q6PD03 | Serine/threonine-protein phosphatase 2A 56 kDa regulatory subunit alpha isoform OS=Mus musculus OX=10090 GN=Ppp2r5a PE=1 SV=1 | 0.686666667 |
| Lrrfip2   | Q91WK0 | Leucine-rich repeat flightless-interacting protein 2 OS=Mus musculus OX=10090 GN=Lrrfip2 PE=1 SV=1                            | 0.696666667 |
| Srsf3     | P84104 | Serine/arginine-rich splicing factor 3 OS=Mus musculus OX=10090 GN=Srsf3 PE=1 SV=1                                            | 0.943333333 |
| Rab12     | P35283 | Ras-related protein Rab-12 OS=Mus musculus OX=10090 GN=Rab12 PE=1 SV=3                                                        | 1.026666667 |
| Ano10     | Q8BH79 | Anoctamin-10 OS=Mus musculus OX=10090 GN=Ano10 PE=1 SV=1                                                                      | 0.79        |
| Smad1     | Q91VZ6 | Stromal membrane-associated protein 1 OS=Mus musculus OX=10090 GN=Smad1 PE=1 SV=1                                             | 1.003333333 |
| Trim24    | Q64127 | Transcription intermediary factor 1-alpha OS=Mus musculus OX=10090 GN=Trim24 PE=1 SV=1                                        | 1.333333333 |
| Tbce      | Q8CIV8 | Tubulin-specific chaperone E OS=Mus musculus OX=10090 GN=Tbce PE=1 SV=1                                                       | 0.85        |
| Prune2    | Q52KR3 | Protein prune homolog 2 OS=Mus musculus OX=10090 GN=Prune2 PE=1 SV=2                                                          | 0.906666667 |
| Ddhd2     | Q80Y98 | Phospholipase DDHD2 OS=Mus musculus OX=10090 GN=Ddhd2 PE=1 SV=3                                                               | 1.016666667 |
| Sh3pxd2a  | O89032 | SH3 and PX domain-containing protein 2A OS=Mus musculus OX=10090 GN=Sh3pxd2a PE=1 SV=2                                        | 1.32        |
| Rbm33     | Q9CXK9 | RNA-binding protein 33 OS=Mus musculus OX=10090 GN=Rbm33 PE=1 SV=2                                                            | 1.086666667 |
| Plekhf1   | Q3TB82 | Pleckstrin homology domain-containing family F member 1 OS=Mus musculus OX=10090 GN=Plekhf1 PE=1 SV=1                         | 0.926666667 |
| Casp6     | O08738 | Caspase-6 OS=Mus musculus OX=10090 GN=Casp6 PE=1 SV=1                                                                         | 0.736666667 |
| Cap2      | Q9CYT6 | Adenylyl cyclase-associated protein 2 OS=Mus musculus OX=10090 GN=Cap2 PE=1 SV=1                                              | 1.216666667 |
| C4b       | P01029 | Complement C4-B OS=Mus musculus OX=10090 GN=C4b PE=1 SV=3                                                                     | 0.11        |
| Ube2r2    | Q6ZWZ2 | Ubiquitin-conjugating enzyme E2 R2 OS=Mus musculus OX=10090 GN=Ube2r2 PE=1 SV=1                                               | 0.896666667 |
| Krt10     | P02535 | Keratin type I cytoskeletal 10 OS=Mus musculus OX=10090 GN=Krt10 PE=1 SV=3                                                    | 0.433333333 |
| Nhp2      | Q9CRB2 | H/ACA ribonucleoprotein complex subunit 2 OS=Mus musculus OX=10090 GN=Nhp2 PE=1 SV=1                                          | 0.863333333 |
| Itpa      | Q9D892 | Inosine triphosphate pyrophosphatase OS=Mus musculus OX=10090 GN=Itpa PE=1 SV=2                                               | 0.826666667 |
| Nudt5     | Q9JKX6 | ADP-sugar pyrophosphatase OS=Mus musculus OX=10090 GN=Nudt5 PE=1 SV=1                                                         | 0.913333333 |
| Hmga2     | P52927 | High mobility group protein HMGI-C OS=Mus musculus OX=10090 GN=Hmga2 PE=1 SV=1                                                | 0.59        |
| Znrd2     | P56873 | Protein ZNRD2 OS=Mus musculus OX=10090 GN=Znrd2 PE=1 SV=1                                                                     | 0.963333333 |
| Usp16     | Q99LG0 | Ubiquitin carboxyl-terminal hydrolase 16 OS=Mus musculus OX=10090 GN=Usp16 PE=1 SV=2                                          | 0.923333333 |
| Cttnbp2nl | Q99LJ0 | CTTNBP2 N-terminal-like protein OS=Mus musculus OX=10090 GN=Cttnbp2nl PE=1 SV=1                                               | 0.94        |
| Nsd2      | Q8BVE8 | Histone-lysine N-methyltransferase NSD2 OS=Mus musculus OX=10090 GN=Nsd2 PE=1 SV=2                                            | 0.783333333 |
| Rbm42     | Q91V81 | RNA-binding protein 42 OS=Mus musculus OX=10090 GN=Rbm42 PE=1 SV=2                                                            | 0.72        |
| Cops8     | Q8VBV7 | COP9 signalosome complex subunit 8 OS=Mus musculus OX=10090 GN=Cops8 PE=1 SV=1                                                | 0.843333333 |

|          |        |                                                                                                                   |             |
|----------|--------|-------------------------------------------------------------------------------------------------------------------|-------------|
| Polr2i   | P60898 | DNA-directed RNA polymerase II subunit RPB9 OS=Mus musculus OX=10090 GN=Polr2i PE=1 SV=1                          | 1.056666667 |
| Stx12    | Q9ER00 | Syntaxin-12 OS=Mus musculus OX=10090 GN=Stx12 PE=1 SV=1                                                           | 0.923333333 |
| Scamp1   | Q8K021 | Secretory carrier-associated membrane protein 1 OS=Mus musculus OX=10090 GN=Scamp1 PE=1 SV=1                      | 0.823333333 |
| Ifrd1    | P19182 | Interferon-related developmental regulator 1 OS=Mus musculus OX=10090 GN=Ifrd1 PE=1 SV=2                          | 1.053333333 |
| Acp1     | Q9D358 | Low molecular weight phosphotyrosine protein phosphatase OS=Mus musculus OX=10090 GN=Acp1 PE=1 SV=1               | 0.873333333 |
| Tradd    | Q3U0V2 | Tumor necrosis factor receptor type 1-associated DEATH domain protein OS=Mus musculus OX=10090 GN=Tradd PE=1 SV=1 | 0.996666667 |
| Uba5     | Q8VE47 | Ubiquitin-like modifier-activating enzyme 5 OS=Mus musculus OX=10090 GN=Uba5 PE=1 SV=2                            | 0.88        |
| Srsf2    | Q62093 | Serine/arginine-rich splicing factor 2 OS=Mus musculus OX=10090 GN=Srsf2 PE=1 SV=4                                | 0.95        |
| Nudt2    | P56380 | Bis(5'-nucleosyl)-tetrphosphatase [asymmetrical] OS=Mus musculus OX=10090 GN=Nudt2 PE=1 SV=1                      | 0.896666667 |
| Tax1bp3  | Q9DBG9 | Tax1-binding protein 3 OS=Mus musculus OX=10090 GN=Tax1bp3 PE=1 SV=1                                              | 0.88        |
| Rps24    | P62849 | 40S ribosomal protein S24 OS=Mus musculus OX=10090 GN=Rps24 PE=1 SV=1                                             | 0.91        |
| Ubfd1    | Q78JW9 | Ubiquitin domain-containing protein UBFD1 OS=Mus musculus OX=10090 GN=Ubfd1 PE=1 SV=2                             | 0.756666667 |
| Pno1     | Q9CPS7 | RNA-binding protein PNO1 OS=Mus musculus OX=10090 GN=Pno1 PE=1 SV=1                                               | 0.81        |
| Cers2    | Q924Z4 | Ceramide synthase 2 OS=Mus musculus OX=10090 GN=Cers2 PE=1 SV=1                                                   | 0.926666667 |
| Micu2    | Q8CD10 | Calcium uptake protein 2 mitochondrial OS=Mus musculus OX=10090 GN=Micu2 PE=1 SV=2                                | 0.816666667 |
| P3h4     | Q8K2B0 | Endoplasmic reticulum protein SC65 OS=Mus musculus OX=10090 GN=P3h4 PE=1 SV=1                                     | 0.986666667 |
| Gap43    | P06837 | Neuromodulin OS=Mus musculus OX=10090 GN=Gap43 PE=1 SV=1                                                          | 0.7         |
| Serpine1 | P22777 | Plasminogen activator inhibitor 1 OS=Mus musculus OX=10090 GN=Serpine1 PE=1 SV=1                                  | 1.285       |
| Sf3b4    | Q8QZY9 | Splicing factor 3B subunit 4 OS=Mus musculus OX=10090 GN=Sf3b4 PE=1 SV=1                                          | 0.866666667 |
| F2       | P19221 | Prothrombin OS=Mus musculus OX=10090 GN=F2 PE=1 SV=1                                                              | 0.27        |
| Utp3     | Q9JI13 | Something about silencing protein 10 OS=Mus musculus OX=10090 GN=Utp3 PE=1 SV=1                                   | 0.873333333 |
| Itprp    | Q3TNL8 | Inositol 1 4 5-trisphosphate receptor-interacting protein OS=Mus musculus OX=10090 GN=Itprp PE=1 SV=1             | 1.346666667 |
| Sub1     | P11031 | Activated RNA polymerase II transcriptional coactivator p15 OS=Mus musculus OX=10090 GN=Sub1 PE=1 SV=1            | 0.92        |
| Snf8     | Q9CZ28 | Vacuolar-sorting protein SNF8 OS=Mus musculus OX=10090 GN=Snf8 PE=1 SV=1                                          | 0.923333333 |
| Stn1     | Q8K2X3 | CST complex subunit STN1 OS=Mus musculus OX=10090 GN=Stn1 PE=1 SV=2                                               | 0.85        |
| Sp1      | O89090 | Transcription factor Sp1 OS=Mus musculus OX=10090 GN=Sp1 PE=1 SV=2                                                | 0.863333333 |
| Exosc5   | Q9CRA8 | Exosome complex component RRP46 OS=Mus musculus OX=10090 GN=Exosc5 PE=1 SV=1                                      | 0.89        |
| Tom1l2   | Q5SRX1 | TOM1-like protein 2 OS=Mus musculus OX=10090 GN=Tom1l2 PE=1 SV=1                                                  | 1.263333333 |
| Cyb5a    | P56395 | Cytochrome b5 OS=Mus musculus OX=10090 GN=Cyb5a PE=1 SV=2                                                         | 0.933333333 |
| Golph3   | Q9CRA5 | Golgi phosphoprotein 3 OS=Mus musculus OX=10090 GN=Golph3 PE=1 SV=1                                               | 0.98        |
| Phf14    | Q9D4H9 | PHD finger protein 14 OS=Mus musculus OX=10090 GN=Phf14 PE=1 SV=1                                                 | 1.016666667 |
| Gid8     | Q9D7M1 | Glucose-induced degradation protein 8 homolog OS=Mus musculus OX=10090 GN=Gid8 PE=1 SV=1                          | 0.946666667 |
| Mtor     | Q9JLN9 | Serine/threonine-protein kinase mTOR OS=Mus musculus OX=10090 GN=Mtor PE=1 SV=2                                   | 1.113333333 |
| Copz1    | P61924 | Coatomer subunit zeta-1 OS=Mus musculus OX=10090 GN=Copz1 PE=1 SV=1                                               | 0.826666667 |



|         |        |                                                                                              |             |
|---------|--------|----------------------------------------------------------------------------------------------|-------------|
| Mrps36  | Q9CQX8 | 28S ribosomal protein S36 mitochondrial OS=Mus musculus OX=10090 GN=Mrps36 PE=1 SV=1         | 0.86        |
| Txndc12 | Q9CQU0 | Thioredoxin domain-containing protein 12 OS=Mus musculus OX=10090 GN=Txndc12 PE=1 SV=1       | 0.886666667 |
| Rnps1   | Q99M28 | RNA-binding protein with serine-rich domain 1 OS=Mus musculus OX=10090 GN=Rnps1 PE=1 SV=1    | 0.813333333 |
| Snrpf   | P62307 | Small nuclear ribonucleoprotein F OS=Mus musculus OX=10090 GN=Snrpf PE=1 SV=1                | 0.883333333 |
| Cog4    | Q8R1U1 | Conserved oligomeric Golgi complex subunit 4 OS=Mus musculus OX=10090 GN=Cog4 PE=1 SV=1      | 0.786666667 |
| Mlf2    | Q99KX1 | Myeloid leukemia factor 2 OS=Mus musculus OX=10090 GN=Mlf2 PE=1 SV=1                         | 0.993333333 |
| Gatd1   | Q8BFQ8 | Glutamine amidotransferase-like class 1 domain-containing protein 1 OS=Mus musculus OX=10090 | 0.833333333 |
| Ube2g2  | P60605 | Ubiquitin-conjugating enzyme E2 G2 OS=Mus musculus OX=10090 GN=Ube2g2 PE=1 SV=1              | 0.993333333 |
| Fkbp7   | O54998 | Peptidyl-prolyl cis-trans isomerase FKBP7 OS=Mus musculus OX=10090 GN=Fkbp7 PE=1 SV=1        | 1.16        |
| Amdhd2  | Q8JZV7 | N-acetylglucosamine-6-phosphate deacetylase OS=Mus musculus OX=10090 GN=Amdhd2 PE=1 SV=      | 1.073333333 |
| Cdk7    | Q03147 | Cyclin-dependent kinase 7 OS=Mus musculus OX=10090 GN=Cdk7 PE=1 SV=2                         | 0.876666667 |
| Nup58   | Q8R332 | Nucleoporin p58/p45 OS=Mus musculus OX=10090 GN=Nup58 PE=1 SV=1                              | 0.86        |
| Gne     | Q91WG8 | Bifunctional UDP-N-acetylglucosamine 2-epimerase/N-acetylmannosamine kinase OS=Mus musculu   | 0.553333333 |
| Pip4k2c | Q91XU3 | Phosphatidylinositol 5-phosphate 4-kinase type-2 gamma OS=Mus musculus OX=10090 GN=Pip4k2    | 0.903333333 |
| Dis3l2  | Q8CI75 | DIS3-like exonuclease 2 OS=Mus musculus OX=10090 GN=Dis3l2 PE=1 SV=1                         | 0.59        |
| Vps13c  | Q8BX70 | Vacuolar protein sorting-associated protein 13C OS=Mus musculus OX=10090 GN=Vps13c PE=1 SV=  | 0.823333333 |
| Pcnp    | Q6P8I4 | PEST proteolytic signal-containing nuclear protein OS=Mus musculus OX=10090 GN=Pcnp PE=1 SV= | 0.8         |
| Gcdh    | Q60759 | Glutaryl-CoA dehydrogenase mitochondrial OS=Mus musculus OX=10090 GN=Gcdh PE=1 SV=2          | 0.933333333 |
| Pycr3   | Q9DCC4 | Pyrroline-5-carboxylate reductase 3 OS=Mus musculus OX=10090 GN=Pycr3 PE=1 SV=2              | 0.87        |
| Lypla2  | Q9WTL7 | Acyl-protein thioesterase 2 OS=Mus musculus OX=10090 GN=Lypla2 PE=1 SV=1                     | 0.893333333 |
| Commd5  | Q8R395 | COMM domain-containing protein 5 OS=Mus musculus OX=10090 GN=Commd5 PE=1 SV=1                | 0.68        |
| Timm8a1 | Q9WVA2 | Mitochondrial import inner membrane translocase subunit Tim8 A OS=Mus musculus OX=10090 GN=  | 0.903333333 |
| Ikbkg   | O88522 | NF-kappa-B essential modulator OS=Mus musculus OX=10090 GN=Ikbkg PE=1 SV=2                   | 0.786666667 |
| Pus10   | Q9D3U0 | tRNA pseudouridine synthase Pus10 OS=Mus musculus OX=10090 GN=Pus10 PE=1 SV=1                | 1.02        |
| Nfkb1   | P25799 | Nuclear factor NF-kappa-B p105 subunit OS=Mus musculus OX=10090 GN=Nfkb1 PE=1 SV=2           | 0.92        |
| Edf1    | Q9JMG1 | Endothelial differentiation-related factor 1 OS=Mus musculus OX=10090 GN=Edf1 PE=1 SV=1      | 0.856666667 |
| Nudcd2  | Q9CQ48 | NudC domain-containing protein 2 OS=Mus musculus OX=10090 GN=Nudcd2 PE=1 SV=1                | 0.883333333 |
| Ssr4    | Q62186 | Translocon-associated protein subunit delta OS=Mus musculus OX=10090 GN=Ssr4 PE=1 SV=1       | 0.863333333 |
| Timm23  | Q9WTQ8 | Mitochondrial import inner membrane translocase subunit Tim23 OS=Mus musculus OX=10090 GN=   | 1.14        |
| Rnf114  | Q9ET26 | E3 ubiquitin-protein ligase RNF114 OS=Mus musculus OX=10090 GN=Rnf114 PE=1 SV=2              | 0.933333333 |
| Edc3    | Q8K2D3 | Enhancer of mRNA-decapping protein 3 OS=Mus musculus OX=10090 GN=Edc3 PE=1 SV=1              | 0.82        |
| Gar1    | Q9CY66 | H/ACA ribonucleoprotein complex subunit 1 OS=Mus musculus OX=10090 GN=Gar1 PE=1 SV=1         | 0.95        |
| Clcc1   | Q99LI2 | Chloride channel CLIC-like protein 1 OS=Mus musculus OX=10090 GN=Clcc1 PE=1 SV=1             | 1           |
| Lsm8    | Q6ZWM4 | U6 snRNA-associated Sm-like protein LSm8 OS=Mus musculus OX=10090 GN=Lsm8 PE=1 SV=3          | 0.91        |

|          |        |                                                                                              |             |
|----------|--------|----------------------------------------------------------------------------------------------|-------------|
| Txndc17  | Q9CQM5 | Thioredoxin domain-containing protein 17 OS=Mus musculus OX=10090 GN=Txndc17 PE=1 SV=1       | 0.92        |
| Polr1d   | P97304 | DNA-directed RNA polymerases I and III subunit RPAC2 OS=Mus musculus OX=10090 GN=Polr1d PE=  | 0.74        |
| Glr5     | Q80Y14 | Glutaredoxin-related protein 5 mitochondrial OS=Mus musculus OX=10090 GN=Glr5 PE=1 SV=2      | 1.05        |
| Sil1     | Q9EPK6 | Nucleotide exchange factor SIL1 OS=Mus musculus OX=10090 GN=Sil1 PE=1 SV=2                   | 0.953333333 |
|          | Q9CXL3 | Uncharacterized protein C7orf50 homolog OS=Mus musculus OX=10090 PE=1 SV=3                   | 0.776666667 |
| Akap13   | E9Q394 | A-kinase anchor protein 13 OS=Mus musculus OX=10090 GN=Akap13 PE=1 SV=1                      | 1.356666667 |
| Ntmt1    | Q8R2U4 | N-terminal Xaa-Pro-Lys N-methyltransferase 1 OS=Mus musculus OX=10090 GN=Ntmt1 PE=1 SV=3     | 0.886666667 |
| Rrp7a    | Q9D1C9 | Ribosomal RNA-processing protein 7 homolog A OS=Mus musculus OX=10090 GN=Rrp7a PE=2 SV=1     | 0.876666667 |
| Nfs1     | Q9Z1J3 | Cysteine desulfurase mitochondrial OS=Mus musculus OX=10090 GN=Nfs1 PE=1 SV=3                | 1.113333333 |
| Cox6b1   | P56391 | Cytochrome c oxidase subunit 6B1 OS=Mus musculus OX=10090 GN=Cox6b1 PE=1 SV=2                | 0.88        |
| Clptm1   | Q8BXA5 | Cleft lip and palate transmembrane protein 1-like protein OS=Mus musculus OX=10090 GN=Clptm1 | 0.926666667 |
| Mrps25   | Q9D125 | 28S ribosomal protein S25 mitochondrial OS=Mus musculus OX=10090 GN=Mrps25 PE=1 SV=1         | 0.856666667 |
| Dapk3    | O54784 | Death-associated protein kinase 3 OS=Mus musculus OX=10090 GN=Dapk3 PE=1 SV=1                | 0.943333333 |
| Rps20    | P60867 | 40S ribosomal protein S20 OS=Mus musculus OX=10090 GN=Rps20 PE=1 SV=1                        | 0.93        |
| Spc24    | Q9D083 | Kinetochore protein Spc24 OS=Mus musculus OX=10090 GN=Spc24 PE=1 SV=1                        | 1.29        |
| Fam111a  | Q9D2L9 | Protein FAM111A OS=Mus musculus OX=10090 GN=Fam111a PE=2 SV=1                                | 0.963333333 |
| Selenof  | Q9ERR7 | Selenoprotein F OS=Mus musculus OX=10090 GN=Selenof PE=1 SV=3                                | 0.986666667 |
| Dicer1   | Q8R418 | Endoribonuclease Dicer OS=Mus musculus OX=10090 GN=Dicer1 PE=1 SV=3                          | 1.27        |
| Ap2s1    | P62743 | AP-2 complex subunit sigma OS=Mus musculus OX=10090 GN=Ap2s1 PE=1 SV=1                       | 0.936666667 |
| Lgalsl   | Q8VED9 | Galectin-related protein OS=Mus musculus OX=10090 GN=Lgalsl PE=1 SV=1                        | 0.816666667 |
| Hdac6    | Q9Z2V5 | Histone deacetylase 6 OS=Mus musculus OX=10090 GN=Hdac6 PE=1 SV=3                            | 0.953333333 |
| H1-0     | P10922 | Histone H1.0 OS=Mus musculus OX=10090 GN=H1-0 PE=2 SV=4                                      | 0.873333333 |
| Sap18    | O55128 | Histone deacetylase complex subunit SAP18 OS=Mus musculus OX=10090 GN=Sap18 PE=1 SV=1        | 0.87        |
| Col4a1   | P02463 | Collagen alpha-1(IV) chain OS=Mus musculus OX=10090 GN=Col4a1 PE=1 SV=4                      | 1.023333333 |
| Rpl38    | Q9JJI8 | 60S ribosomal protein L38 OS=Mus musculus OX=10090 GN=Rpl38 PE=1 SV=3                        | 0.92        |
| Trappc11 | B2RXC1 | Trafficking protein particle complex subunit 11 OS=Mus musculus OX=10090 GN=Trappc11 PE=1 SV | 0.97        |
| Rps25    | P62852 | 40S ribosomal protein S25 OS=Mus musculus OX=10090 GN=Rps25 PE=1 SV=1                        | 0.866666667 |
| Glr5     | Q9QUH0 | Glutaredoxin-1 OS=Mus musculus OX=10090 GN=Glr5 PE=1 SV=3                                    | 0.85        |
| Utp11    | Q9CZJ1 | Probable U3 small nucleolar RNA-associated protein 11 OS=Mus musculus OX=10090 GN=Utp11 PE   | 0.833333333 |
| Ttk      | P35761 | Dual specificity protein kinase TTK OS=Mus musculus OX=10090 GN=Ttk PE=1 SV=1                | 1.416666667 |
| Xpnpep3  | B7ZMP1 | Xaa-Pro aminopeptidase 3 OS=Mus musculus OX=10090 GN=Xpnpep3 PE=1 SV=1                       | 0.843333333 |
| Mios     | Q8VE19 | GATOR complex protein MIOS OS=Mus musculus OX=10090 GN=Mios PE=1 SV=2                        | 2.226666667 |
| Cox15    | Q8BJ03 | Cytochrome c oxidase assembly protein COX15 homolog OS=Mus musculus OX=10090 GN=Cox15 P      | 0.823333333 |
| Cnot3    | Q8K0V4 | CCR4-NOT transcription complex subunit 3 OS=Mus musculus OX=10090 GN=Cnot3 PE=1 SV=1         | 0.84        |

|         |        |                                                                                                                            |             |
|---------|--------|----------------------------------------------------------------------------------------------------------------------------|-------------|
| Ndc80   | Q9D0F1 | Kinetochore protein NDC80 homolog OS=Mus musculus OX=10090 GN=Ndc80 PE=1 SV=1                                              | 0.903333333 |
| Dnajc21 | E9Q8D0 | DnaJ homolog subfamily C member 21 OS=Mus musculus OX=10090 GN=Dnajc21 PE=1 SV=1                                           | 0.82        |
| Rpl27a  | P14115 | 60S ribosomal protein L27a OS=Mus musculus OX=10090 GN=Rpl27a PE=1 SV=5                                                    | 0.893333333 |
| Zmym2   | Q9CU65 | Zinc finger MYM-type protein 2 OS=Mus musculus OX=10090 GN=Zmym2 PE=1 SV=3                                                 | 0.583333333 |
| Cryzl1  | Q921W4 | Quinone oxidoreductase-like protein 1 OS=Mus musculus OX=10090 GN=Cryzl1 PE=1 SV=1                                         | 0.92        |
| Gpx7    | Q99LJ6 | Glutathione peroxidase 7 OS=Mus musculus OX=10090 GN=Gpx7 PE=1 SV=1                                                        | 0.843333333 |
| Surf4   | Q64310 | Surfeit locus protein 4 OS=Mus musculus OX=10090 GN=Surf4 PE=1 SV=1                                                        | 0.93        |
| Wdr92   | Q8BGF3 | WD repeat-containing protein 92 OS=Mus musculus OX=10090 GN=Wdr92 PE=1 SV=1                                                | 0.873333333 |
| Baz1a   | O88379 | Bromodomain adjacent to zinc finger domain protein 1A OS=Mus musculus OX=10090 GN=Baz1a PE=1 SV=1                          | 1.176666667 |
| Fam192a | Q91WE2 | PSME3-interacting protein OS=Mus musculus OX=10090 GN=Psme3ip1 PE=1 SV=1                                                   | 0.93        |
| Ppp3r1  | Q63810 | Calcineurin subunit B type 1 OS=Mus musculus OX=10090 GN=Ppp3r1 PE=1 SV=3                                                  | 1.023333333 |
| Rttn    | Q8R4Y8 | Rotatin OS=Mus musculus OX=10090 GN=Rttn PE=1 SV=2                                                                         | 1.096666667 |
| Polr2g  | P62488 | DNA-directed RNA polymerase II subunit RPB7 OS=Mus musculus OX=10090 GN=Polr2g PE=1 SV=1                                   | 0.7         |
| Arpc5l  | Q9D898 | Actin-related protein 2/3 complex subunit 5-like protein OS=Mus musculus OX=10090 GN=Arpc5l PE=1 SV=1                      | 0.946666667 |
| Plscr3  | Q9JIZ9 | Phospholipid scramblase 3 OS=Mus musculus OX=10090 GN=Plscr3 PE=1 SV=1                                                     | 1.03        |
| Wdr48   | Q8BH57 | WD repeat-containing protein 48 OS=Mus musculus OX=10090 GN=Wdr48 PE=1 SV=1                                                | 0.563333333 |
| Pik3c2a | Q61194 | Phosphatidylinositol 4-phosphate 3-kinase C2 domain-containing subunit alpha OS=Mus musculus OX=10090 GN=Pik3c2a PE=1 SV=1 | 1.056666667 |
| Dcaf7   | P61963 | DDB1- and CUL4-associated factor 7 OS=Mus musculus OX=10090 GN=Dcaf7 PE=1 SV=1                                             | 1.003333333 |
| Dhrs4   | Q99LB2 | Dehydrogenase/reductase SDR family member 4 OS=Mus musculus OX=10090 GN=Dhrs4 PE=1 SV=3                                    | 0.693333333 |
| Zwint   | Q9CQU5 | ZW10 interactor OS=Mus musculus OX=10090 GN=Zwint PE=1 SV=1                                                                | 0.903333333 |
| Bola1   | Q9D8S9 | Bola-like protein 1 OS=Mus musculus OX=10090 GN=Bola1 PE=1 SV=1                                                            | 0.943333333 |
| Carmil1 | Q6EDY6 | F-actin-uncapping protein LRRC16A OS=Mus musculus OX=10090 GN=Carmil1 PE=1 SV=2                                            | 1.033333333 |
| Cisd1   | Q91WS0 | CDGSH iron-sulfur domain-containing protein 1 OS=Mus musculus OX=10090 GN=Cisd1 PE=1 SV=1                                  | 0.986666667 |
| Slc9a1  | Q61165 | Sodium/hydrogen exchanger 1 OS=Mus musculus OX=10090 GN=Slc9a1 PE=1 SV=1                                                   | 1.216666667 |
| Pfdn1   | Q9CWM4 | Prefoldin subunit 1 OS=Mus musculus OX=10090 GN=Pfdn1 PE=1 SV=1                                                            | 0.836666667 |
| Phpt1   | Q9DAK9 | 14 kDa phosphohistidine phosphatase OS=Mus musculus OX=10090 GN=Phpt1 PE=1 SV=1                                            | 1.02        |
| Fis1    | Q9CQ92 | Mitochondrial fission 1 protein OS=Mus musculus OX=10090 GN=Fis1 PE=1 SV=1                                                 | 0.866666667 |
| Ssu72   | Q9CY97 | RNA polymerase II subunit A C-terminal domain phosphatase SSU72 OS=Mus musculus OX=10090 GN=Ssu72 PE=1 SV=1                | 0.873333333 |
| Cog6    | Q8R3I3 | Conserved oligomeric Golgi complex subunit 6 OS=Mus musculus OX=10090 GN=Cog6 PE=1 SV=2                                    | 1.173333333 |
| Mrpl44  | Q9CY73 | 39S ribosomal protein L44 mitochondrial OS=Mus musculus OX=10090 GN=Mrpl44 PE=1 SV=3                                       | 1.293333333 |
| Sdhaf2  | Q8C6I2 | Succinate dehydrogenase assembly factor 2 mitochondrial OS=Mus musculus OX=10090 GN=Sdhaf2 PE=1 SV=1                       | 0.836666667 |

|          |        |                                                                                                 |             |
|----------|--------|-------------------------------------------------------------------------------------------------|-------------|
| Ints10   | Q8K2A7 | Integrator complex subunit 10 OS=Mus musculus OX=10090 GN=Ints10 PE=1 SV=3                      | 1.886666667 |
| Tmx4     | Q8C0L0 | Thioredoxin-related transmembrane protein 4 OS=Mus musculus OX=10090 GN=Tmx4 PE=1 SV=2          | 0.83        |
| Tarbp2   | P97473 | RISC-loading complex subunit TARBP2 OS=Mus musculus OX=10090 GN=Tarbp2 PE=1 SV=2                | 1.296666667 |
| Guk1     | Q64520 | Guanylate kinase OS=Mus musculus OX=10090 GN=Guk1 PE=1 SV=2                                     | 0.81        |
| Uck2     | Q99PM9 | Uridine-cytidine kinase 2 OS=Mus musculus OX=10090 GN=Uck2 PE=1 SV=1                            | 0.906666667 |
| Pin4     | Q9CWW6 | Peptidyl-prolyl cis-trans isomerase NIMA-interacting 4 OS=Mus musculus OX=10090 GN=Pin4 PE=1    | 0.793333333 |
| Pdk1     | Q8BFP9 | [Pyruvate dehydrogenase (acetyl-transferring)] kinase isozyme 1 mitochondrial OS=Mus musculus O | 0.866666667 |
| Cnn1     | Q08091 | Calponin-1 OS=Mus musculus OX=10090 GN=Cnn1 PE=1 SV=1                                           | 0.916666667 |
| Psen1    | P49769 | Presenilin-1 OS=Mus musculus OX=10090 GN=Psen1 PE=1 SV=1                                        | 1.23        |
| Cactin   | Q9CS00 | Cactin OS=Mus musculus OX=10090 GN=Cactin PE=1 SV=2                                             | 1.236666667 |
| Amacr    | O09174 | Alpha-methylacyl-CoA racemase OS=Mus musculus OX=10090 GN=Amacr PE=1 SV=4                       | 0.846666667 |
| Knop1    | Q9Z2Q2 | Lysine-rich nucleolar protein 1 OS=Mus musculus OX=10090 GN=Knop1 PE=1 SV=2                     | 0.83        |
| Slc39a10 | Q6P5F6 | Zinc transporter ZIP10 OS=Mus musculus OX=10090 GN=Slc39a10 PE=1 SV=1                           | 0.956666667 |
| Hebp1    | Q9R257 | Heme-binding protein 1 OS=Mus musculus OX=10090 GN=Hebp1 PE=1 SV=2                              | 0.69        |
| Hagh     | Q99KB8 | Hydroxyacylglutathione hydrolase mitochondrial OS=Mus musculus OX=10090 GN=Hagh PE=1 SV=        | 0.75        |
| Fpgs     | P48760 | Folypolyglutamate synthase mitochondrial OS=Mus musculus OX=10090 GN=Fpgs PE=1 SV=3             | 1.033333333 |
| Exosc1   | Q9DAA6 | Exosome complex component CSL4 OS=Mus musculus OX=10090 GN=Exosc1 PE=1 SV=1                     | 0.91        |
| Spryd7   | Q3TFQ1 | SPRY domain-containing protein 7 OS=Mus musculus OX=10090 GN=Spryd7 PE=1 SV=2                   | 0.966666667 |
| Tpbg     | Q9Z0L0 | Trophoblast glycoprotein OS=Mus musculus OX=10090 GN=Tpbg PE=1 SV=3                             | 1.373333333 |
| Hsd17b7  | O88736 | 3-keto-steroid reductase/17-beta-hydroxysteroid dehydrogenase 7 OS=Mus musculus OX=10090 GN=    | 1.056666667 |
| Sdf2l1   | Q9ESP1 | Stromal cell-derived factor 2-like protein 1 OS=Mus musculus OX=10090 GN=Sdf2l1 PE=1 SV=2       | 1.973333333 |
| Uqcrb    | Q9D855 | Cytochrome b-c1 complex subunit 7 OS=Mus musculus OX=10090 GN=Uqcrb PE=1 SV=3                   | 0.956666667 |
| Ass1     | P16460 | Argininosuccinate synthase OS=Mus musculus OX=10090 GN=Ass1 PE=1 SV=1                           | 1.156666667 |
| Imp4     | Q8VHZ7 | U3 small nucleolar ribonucleoprotein protein IMP4 OS=Mus musculus OX=10090 GN=Imp4 PE=2 SV=     | 0.92        |
| F2r      | P30558 | Proteinase-activated receptor 1 OS=Mus musculus OX=10090 GN=F2r PE=1 SV=2                       | 0.963333333 |
| Aar2     | Q9D2V5 | Protein AAR2 homolog OS=Mus musculus OX=10090 GN=Aar2 PE=1 SV=3                                 | 0.58        |
| Rida     | P52760 | 2-iminobutanoate/2-iminopropanoate deaminase OS=Mus musculus OX=10090 GN=Rida PE=1 SV=          | 1.06        |
| Ttc3     | O88196 | E3 ubiquitin-protein ligase TTC3 OS=Mus musculus OX=10090 GN=Ttc3 PE=1 SV=2                     | 1.473333333 |
| Stx8     | O88983 | Syntaxin-8 OS=Mus musculus OX=10090 GN=Stx8 PE=1 SV=1                                           | 0.763333333 |
| Gtf3c5   | Q8R2T8 | General transcription factor 3C polypeptide 5 OS=Mus musculus OX=10090 GN=Gtf3c5 PE=2 SV=2      | 0.95        |
| Zyg11b   | Q3UFS0 | Protein zyg-11 homolog B OS=Mus musculus OX=10090 GN=Zyg11b PE=1 SV=2                           | 0.68        |
| Nt5c3a   | Q9D020 | Cytosolic 5'-nucleotidase 3A OS=Mus musculus OX=10090 GN=Nt5c3a PE=1 SV=4                       | 1.076666667 |
| Phf5a    | P83870 | PHD finger-like domain-containing protein 5A OS=Mus musculus OX=10090 GN=Phf5a PE=1 SV=1        | 0.916666667 |
| Stard4   | Q99JV5 | StAR-related lipid transfer protein 4 OS=Mus musculus OX=10090 GN=Stard4 PE=1 SV=1              | 0.793333333 |

|           |         |                                                                                             |             |
|-----------|---------|---------------------------------------------------------------------------------------------|-------------|
| F3        | P20352  | Tissue factor OS=Mus musculus OX=10090 GN=F3 PE=1 SV=2                                      | 0.593333333 |
| Mtmt10    | Q7TPM9  | Myotubularin-related protein 10 OS=Mus musculus OX=10090 GN=Mtmt10 PE=1 SV=2                | 1.13        |
| Rpl36a    | P83882  | 60S ribosomal protein L36a OS=Mus musculus OX=10090 GN=Rpl36a PE=3 SV=2                     | 0.87        |
| Lpcat3    | Q91V01  | Lysophospholipid acyltransferase 5 OS=Mus musculus OX=10090 GN=Lpcat3 PE=1 SV=1             | 0.853333333 |
| Wdr45b    | Q9CR39  | WD repeat domain phosphoinositide-interacting protein 3 OS=Mus musculus OX=10090 GN=Wdr4    | 0.866666667 |
| Slirp     | Q9D8T7  | SRA stem-loop-interacting RNA-binding protein mitochondrial OS=Mus musculus OX=10090 GN=Sl  | 0.943333333 |
| Uevld     | Q3U1V6  | Ubiquitin-conjugating enzyme E2 variant 3 OS=Mus musculus OX=10090 GN=Uevld PE=1 SV=1       | 1.326666667 |
| Mrpl46    | Q9EQI8  | 39S ribosomal protein L46 mitochondrial OS=Mus musculus OX=10090 GN=Mrpl46 PE=1 SV=1        | 1.01        |
| Frmd8     | Q3U FK8 | FERM domain-containing protein 8 OS=Mus musculus OX=10090 GN=Frmd8 PE=1 SV=2                | 0.96        |
| Hmgcl     | P38060  | Hydroxymethylglutaryl-CoA lyase mitochondrial OS=Mus musculus OX=10090 GN=Hmgcl PE=1 SV=    | 0.833333333 |
| Fkbp11    | Q9D1M7  | Peptidyl-prolyl cis-trans isomerase FKBP11 OS=Mus musculus OX=10090 GN=Fkbp11 PE=1 SV=1     | 0.84        |
| Cfap20    | Q8BTU1  | Cilia- and flagella-associated protein 20 OS=Mus musculus OX=10090 GN=Cfap20 PE=1 SV=1      | 1.316666667 |
| Ublcp1    | Q8BGR9  | Ubiquitin-like domain-containing CTD phosphatase 1 OS=Mus musculus OX=10090 GN=Ublcp1 PE=   | 0.803333333 |
| Melk      | Q61846  | Maternal embryonic leucine zipper kinase OS=Mus musculus OX=10090 GN=Melk PE=1 SV=2         | 1.35        |
| Amotl2    | Q8K371  | Angiomotin-like protein 2 OS=Mus musculus OX=10090 GN=Amotl2 PE=1 SV=1                      | 0.82        |
| Znf598    | Q80YR4  | E3 ubiquitin-protein ligase ZNF598 OS=Mus musculus OX=10090 GN=Znf598 PE=1 SV=1             | 0.77        |
| Sdf2      | Q9DCT5  | Stromal cell-derived factor 2 OS=Mus musculus OX=10090 GN=Sdf2 PE=1 SV=1                    | 0.866666667 |
| Tmem87a   | Q8BXN9  | Transmembrane protein 87A OS=Mus musculus OX=10090 GN=Tmem87a PE=1 SV=1                     | 0.776666667 |
| Cdk5rap2  | Q8K389  | CDK5 regulatory subunit-associated protein 2 OS=Mus musculus OX=10090 GN=Cdk5rap2 PE=1 SV=  | 1.436666667 |
| Rpp38     | Q80UU2  | Ribonuclease P protein subunit p38 OS=Mus musculus OX=10090 GN=Rpp38 PE=1 SV=1              | 1.153333333 |
| Riok1     | Q922Q2  | Serine/threonine-protein kinase RIO1 OS=Mus musculus OX=10090 GN=Riok1 PE=1 SV=2            | 0.796666667 |
| Adi1      | Q99JT9  | 1,2-dihydroxy-3-keto-5-methylthiopentene dioxygenase OS=Mus musculus OX=10090 GN=Adi1 PE=   | 1.13        |
| Taf9      | Q8VI33  | Transcription initiation factor TFIID subunit 9 OS=Mus musculus OX=10090 GN=Taf9 PE=1 SV=1  | 1.143333333 |
| Prune1    | Q8BIW1  | Exopolyphosphatase PRUNE1 OS=Mus musculus OX=10090 GN=Prune1 PE=1 SV=1                      | 0.916666667 |
| Ddx28     | Q9CWT6  | Probable ATP-dependent RNA helicase DDX28 OS=Mus musculus OX=10090 GN=Ddx28 PE=2 SV=2       | 0.826666667 |
| Uqcrrh    | P99028  | Cytochrome b-c1 complex subunit 6 mitochondrial OS=Mus musculus OX=10090 GN=Uqcrrh PE=1 SV= | 0.883333333 |
| Rpia      | P47968  | Ribose-5-phosphate isomerase OS=Mus musculus OX=10090 GN=Rpia PE=1 SV=2                     | 1.11        |
| Nipsnap3b | Q9CQE1  | Protein NipSnap homolog 3B OS=Mus musculus OX=10090 GN=Nipsnap3b PE=1 SV=1                  | 0.873333333 |
| Sos1      | Q62245  | Son of sevenless homolog 1 OS=Mus musculus OX=10090 GN=Sos1 PE=1 SV=2                       | 1.343333333 |
| Slc44a2   | Q8BY89  | Choline transporter-like protein 2 OS=Mus musculus OX=10090 GN=Slc44a2 PE=1 SV=2            | 0.713333333 |
| Dctn6     | Q9WUB4  | Dynactin subunit 6 OS=Mus musculus OX=10090 GN=Dctn6 PE=1 SV=1                              | 0.73        |
| Pym1      | Q8CHP5  | Partner of Y14 and mago OS=Mus musculus OX=10090 GN=Pym1 PE=1 SV=2                          | 0.903333333 |
| Itga3     | Q62470  | Integrin alpha-3 OS=Mus musculus OX=10090 GN=Itga3 PE=1 SV=1                                | 1.34        |
| Tjap1     | Q9DCD5  | Tight junction-associated protein 1 OS=Mus musculus OX=10090 GN=Tjap1 PE=1 SV=1             | 0.893333333 |



|          |        |                                                                                                   |             |
|----------|--------|---------------------------------------------------------------------------------------------------|-------------|
| Setdb1   | O88974 | Histone-lysine N-methyltransferase SETDB1 OS=Mus musculus OX=10090 GN=Setdb1 PE=1 SV=1            | 1.316666667 |
| Txndc9   | Q9CQ79 | Thioredoxin domain-containing protein 9 OS=Mus musculus OX=10090 GN=Txndc9 PE=1 SV=1              | 1.246666667 |
| Zadh2    | Q8BGC4 | Prostaglandin reductase-3 OS=Mus musculus OX=10090 GN=Zadh2 PE=1 SV=1                             | 0.923333333 |
| Pef1     | Q8BFY6 | Peflin OS=Mus musculus OX=10090 GN=Pef1 PE=1 SV=1                                                 | 0.973333333 |
| Nqo1     | Q64669 | NAD(P)H dehydrogenase [quinone] 1 OS=Mus musculus OX=10090 GN=Nqo1 PE=1 SV=3                      | 0.953333333 |
| Rnf181   | Q9CY62 | E3 ubiquitin-protein ligase RNF181 OS=Mus musculus OX=10090 GN=Rnf181 PE=1 SV=1                   | 1.23        |
| Slain2   | Q8CI08 | SLAIN motif-containing protein 2 OS=Mus musculus OX=10090 GN=Slain2 PE=1 SV=2                     | 1.323333333 |
| Ndufb10  | Q9DCS9 | NADH dehydrogenase [ubiquinone] 1 beta subcomplex subunit 10 OS=Mus musculus OX=10090 GN=Ndufb10  | 0.846666667 |
| Itsn1    | Q9Z0R4 | Intersectin-1 OS=Mus musculus OX=10090 GN=Itsn1 PE=1 SV=2                                         | 0.576666667 |
| Commd10  | Q8JZY2 | COMM domain-containing protein 10 OS=Mus musculus OX=10090 GN=Commd10 PE=1 SV=1                   | 1.05        |
| Ppih     | Q9D868 | Peptidyl-prolyl cis-trans isomerase H OS=Mus musculus OX=10090 GN=Ppih PE=1 SV=1                  | 0.893333333 |
| Chm      | Q9QXG2 | Rab proteins geranylgeranyltransferase component A 1 OS=Mus musculus OX=10090 GN=Chm PE=1         | 0.823333333 |
| Gfer     | P56213 | FAD-linked sulfhydryl oxidase ALR OS=Mus musculus OX=10090 GN=Gfer PE=1 SV=2                      | 0.766666667 |
| Sec62    | Q8BU14 | Translocation protein SEC62 OS=Mus musculus OX=10090 GN=Sec62 PE=1 SV=1                           | 0.833333333 |
| Lsm4     | Q9QXA5 | U6 snRNA-associated Sm-like protein LSm4 OS=Mus musculus OX=10090 GN=Lsm4 PE=1 SV=1               | 0.953333333 |
| Slmap    | Q3URD3 | Sarcolemmal membrane-associated protein OS=Mus musculus OX=10090 GN=Slmap PE=1 SV=2               | 0.75        |
| Tango6   | Q8C3S2 | Transport and Golgi organization protein 6 homolog OS=Mus musculus OX=10090 GN=Tango6 PE=1        | 2.663333333 |
| Impad1   | Q80V26 | Golgi-resident adenosine 3' 5'-bisphosphate 3'-phosphatase OS=Mus musculus OX=10090 GN=Impad1     | 1.08        |
| Knstrn   | Q9D9Z1 | Small kinetochore-associated protein OS=Mus musculus OX=10090 GN=Knstrn PE=2 SV=2                 | 0.823333333 |
| Phlpp1   | Q8CHE4 | PH domain leucine-rich repeat-containing protein phosphatase 1 OS=Mus musculus OX=10090 GN=Phlpp1 | 1.21        |
| Sufu     | Q9Z0P7 | Suppressor of fused homolog OS=Mus musculus OX=10090 GN=Sufu PE=1 SV=1                            | 0.846666667 |
| Nol12    | Q8BG17 | Nucleolar protein 12 OS=Mus musculus OX=10090 GN=Nol12 PE=1 SV=1                                  | 0.92        |
| Haus3    | Q8QZX2 | HAUS augmin-like complex subunit 3 OS=Mus musculus OX=10090 GN=Haus3 PE=1 SV=1                    | 1.373333333 |
| Usp38    | Q8BW70 | Ubiquitin carboxyl-terminal hydrolase 38 OS=Mus musculus OX=10090 GN=Usp38 PE=1 SV=2              | 0.93        |
| Foxk1    | P42128 | Forkhead box protein K1 OS=Mus musculus OX=10090 GN=Foxk1 PE=1 SV=2                               | 0.465       |
| Utp23    | Q9CX11 | rRNA-processing protein UTP23 homolog OS=Mus musculus OX=10090 GN=Utp23 PE=2 SV=1                 | 0.973333333 |
| Mrpl23   | O35972 | 39S ribosomal protein L23 mitochondrial OS=Mus musculus OX=10090 GN=Mrpl23 PE=1 SV=1              | 0.953333333 |
| Sorcs2   | Q9EPR5 | VPS10 domain-containing receptor SorCS2 OS=Mus musculus OX=10090 GN=Sorcs2 PE=1 SV=2              | 0.543333333 |
| Atp5me   | Q06185 | ATP synthase subunit e mitochondrial OS=Mus musculus OX=10090 GN=Atp5me PE=1 SV=2                 | 0.896666667 |
| Fam177a1 | Q8BR63 | Protein FAM177A1 OS=Mus musculus OX=10090 GN=Fam177a1 PE=1 SV=1                                   | 0.93        |
| Mdp1     | Q9D967 | Magnesium-dependent phosphatase 1 OS=Mus musculus OX=10090 GN=Mdp1 PE=1 SV=1                      | 0.726666667 |
| Rab16    | Q5U3K5 | Rab-like protein 6 OS=Mus musculus OX=10090 GN=Rab16 PE=1 SV=2                                    | 0.87        |
| Lrrc8a   | Q80WG5 | Volume-regulated anion channel subunit LRRC8A OS=Mus musculus OX=10090 GN=Lrrc8a PE=1 SV=2        | 2.9         |
| Pam      | P97467 | Peptidyl-glycine alpha-amidating monooxygenase OS=Mus musculus OX=10090 GN=Pam PE=1 SV=2          | 2.783333333 |

|         |        |                                                                                                             |             |
|---------|--------|-------------------------------------------------------------------------------------------------------------|-------------|
| Stx6    | Q9JJK1 | Syntaxin-6 OS=Mus musculus OX=10090 GN=Stx6 PE=1 SV=1                                                       | 1.063333333 |
| Lrch3   | Q8BVU0 | DISP complex protein LRCH3 OS=Mus musculus OX=10090 GN=Lrch3 PE=1 SV=3                                      | 1.245       |
| Magt1   | Q9CQY5 | Magnesium transporter protein 1 OS=Mus musculus OX=10090 GN=Magt1 PE=1 SV=1                                 | 0.946666667 |
| Acyp1   | P56376 | Acylphosphatase-1 OS=Mus musculus OX=10090 GN=Acyp1 PE=1 SV=2                                               | 0.733333333 |
| Gpx8    | Q9D7B7 | Probable glutathione peroxidase 8 OS=Mus musculus OX=10090 GN=Gpx8 PE=1 SV=1                                | 0.903333333 |
| Tram1   | Q91V04 | Translocating chain-associated membrane protein 1 OS=Mus musculus OX=10090 GN=Tram1 PE=1 SV=1               | 0.93        |
| Tsen34  | Q8BMZ5 | tRNA-splicing endonuclease subunit Sen34 OS=Mus musculus OX=10090 GN=Tsen34 PE=2 SV=2                       | 0.813333333 |
| Gkap1   | Q9JMB0 | G kinase-anchoring protein 1 OS=Mus musculus OX=10090 GN=Gkap1 PE=1 SV=1                                    | 0.906666667 |
| Steap1  | Q9CWR7 | Metalloreductase STEAP1 OS=Mus musculus OX=10090 GN=Steap1 PE=1 SV=2                                        | 1.653333333 |
| Srp9    | P49962 | Signal recognition particle 9 kDa protein OS=Mus musculus OX=10090 GN=Srp9 PE=1 SV=2                        | 0.88        |
| Gpx1    | P11352 | Glutathione peroxidase 1 OS=Mus musculus OX=10090 GN=Gpx1 PE=1 SV=2                                         | 0.863333333 |
| Ptpra   | P18052 | Receptor-type tyrosine-protein phosphatase alpha OS=Mus musculus OX=10090 GN=Ptpra PE=1 SV=1                | 0.956666667 |
| Mrps6   | P58064 | 28S ribosomal protein S6 mitochondrial OS=Mus musculus OX=10090 GN=Mrps6 PE=1 SV=3                          | 0.763333333 |
| Ahsa2   | Q8N9S3 | Activator of 90 kDa heat shock protein ATPase homolog 2 OS=Mus musculus OX=10090 GN=Ahsa2 PE=1 SV=1         | 0.773333333 |
| Rabggtb | P53612 | Geranylgeranyl transferase type-2 subunit beta OS=Mus musculus OX=10090 GN=Rabggtb PE=1 SV=1                | 0.956666667 |
| Ufc1    | Q9CR09 | Ubiquitin-fold modifier-conjugating enzyme 1 OS=Mus musculus OX=10090 GN=Ufc1 PE=1 SV=1                     | 0.906666667 |
| Gpaa1   | Q9WTK3 | Glycosylphosphatidylinositol anchor attachment 1 protein OS=Mus musculus OX=10090 GN=Gpaa1 PE=1 SV=1        | 1.33        |
| Pdhx    | Q8BKZ9 | Pyruvate dehydrogenase protein X component mitochondrial OS=Mus musculus OX=10090 GN=Pdhx PE=1 SV=1         | 0.823333333 |
| Vwa8    | Q8CC88 | von Willebrand factor A domain-containing protein 8 OS=Mus musculus OX=10090 GN=Vwa8 PE=1 SV=1              | 1           |
| Ergic3  | Q9CQE7 | Endoplasmic reticulum-Golgi intermediate compartment protein 3 OS=Mus musculus OX=10090 GN=Ergic3 PE=1 SV=1 | 0.896666667 |
| Toe1    | Q9D2E2 | Target of EGR1 protein 1 OS=Mus musculus OX=10090 GN=Toe1 PE=1 SV=1                                         | 0.9         |
| Arid2   | E9Q7E2 | AT-rich interactive domain-containing protein 2 OS=Mus musculus OX=10090 GN=Arid2 PE=1 SV=1                 | 1.596666667 |
| Mecp2   | Q9Z2D6 | Methyl-CpG-binding protein 2 OS=Mus musculus OX=10090 GN=Mecp2 PE=1 SV=1                                    | 0.526666667 |
| Otulin  | Q3UCV8 | Ubiquitin thioesterase otulin OS=Mus musculus OX=10090 GN=Otulin PE=1 SV=1                                  | 0.753333333 |
| Derl1   | Q99J56 | Derlin-1 OS=Mus musculus OX=10090 GN=Derl1 PE=1 SV=1                                                        | 0.87        |
| Morf4l2 | Q9R0Q4 | Mortality factor 4-like protein 2 OS=Mus musculus OX=10090 GN=Morf4l2 PE=1 SV=1                             | 1.72        |
| Rwdd4   | Q9CPR1 | RWD domain-containing protein 4 OS=Mus musculus OX=10090 GN=Rwdd4 PE=2 SV=1                                 | 1.023333333 |
| Tm9sf1  | Q9DBU0 | Transmembrane 9 superfamily member 1 OS=Mus musculus OX=10090 GN=Tm9sf1 PE=2 SV=2                           | 1.446666667 |
| Casp7   | P97864 | Caspase-7 OS=Mus musculus OX=10090 GN=Casp7 PE=1 SV=2                                                       | 1.09        |
| Ascc1   | Q9D8Z1 | Activating signal cointegrator 1 complex subunit 1 OS=Mus musculus OX=10090 GN=Ascc1 PE=1 SV=1              | 1.15        |
| Apmmap  | Q9D7N9 | Adipocyte plasma membrane-associated protein OS=Mus musculus OX=10090 GN=Apmmap PE=1 SV=1                   | 0.66        |
| Surf6   | P70279 | Surfeit locus protein 6 OS=Mus musculus OX=10090 GN=Surf6 PE=1 SV=1                                         | 1.29        |
| Eif1b   | Q9CXU9 | Eukaryotic translation initiation factor 1b OS=Mus musculus OX=10090 GN=Eif1b PE=1 SV=2                     | 1.55        |
| Mob1a   | Q921Y0 | MOB kinase activator 1A OS=Mus musculus OX=10090 GN=Mob1a PE=2 SV=3                                         |             |

|          |        |                                                                                               |             |
|----------|--------|-----------------------------------------------------------------------------------------------|-------------|
| Mob1b    | Q8BPB0 | MOB kinase activator 1B OS=Mus musculus OX=10090 GN=Mob1b PE=1 SV=3                           | 1.196666667 |
| Mapk9    | Q9WTU6 | Mitogen-activated protein kinase 9 OS=Mus musculus OX=10090 GN=Mapk9 PE=1 SV=2                |             |
| Ube2v2   | Q9D2M8 | Ubiquitin-conjugating enzyme E2 variant 2 OS=Mus musculus OX=10090 GN=Ube2v2 PE=1 SV=4        | 0.963333333 |
| Atp4a    | Q64436 | Potassium-transporting ATPase alpha chain 1 OS=Mus musculus OX=10090 GN=Atp4a PE=1 SV=3       |             |
| Ephb3    | P54754 | Ephrin type-B receptor 3 OS=Mus musculus OX=10090 GN=Ephb3 PE=1 SV=2                          |             |
| Mapk8    | Q91Y86 | Mitogen-activated protein kinase 8 OS=Mus musculus OX=10090 GN=Mapk8 PE=1 SV=1                |             |
| Fyn      | P39688 | Tyrosine-protein kinase Fyn OS=Mus musculus OX=10090 GN=Fyn PE=1 SV=4                         | 0.75        |
| Cab39l   | Q9DB16 | Calcium-binding protein 39-like OS=Mus musculus OX=10090 GN=Cab39l PE=1 SV=3                  |             |
| Csnk1e   | Q9JMK2 | Casein kinase I isoform epsilon OS=Mus musculus OX=10090 GN=Csnk1e PE=1 SV=2                  |             |
| Plxna3   | P70208 | Plexin-A3 OS=Mus musculus OX=10090 GN=Plxna3 PE=1 SV=2                                        |             |
| Mbnl1    | Q9JKP5 | Muscleblind-like protein 1 OS=Mus musculus OX=10090 GN=Mbnl1 PE=1 SV=1                        |             |
| Rps27    | Q6ZWU9 | 40S ribosomal protein S27 OS=Mus musculus OX=10090 GN=Rps27 PE=1 SV=3                         | 0.82        |
| Rps27l   | Q6ZWY3 | 40S ribosomal protein S27-like OS=Mus musculus OX=10090 GN=Rps27l PE=1 SV=3                   | 0.79        |
| Rprd1a   | Q8VDS4 | Regulation of nuclear pre-mRNA domain-containing protein 1A OS=Mus musculus OX=10090 GN=R     | 0.88        |
| Smad1    | P70340 | Mothers against decapentaplegic homolog 1 OS=Mus musculus OX=10090 GN=Smad1 PE=1 SV=2         | 0.936666667 |
| Rala     | P63321 | Ras-related protein Ral-A OS=Mus musculus OX=10090 GN=Rala PE=1 SV=1                          | 0.723333333 |
| Mapre3   | Q6PER3 | Microtubule-associated protein RP/EB family member 3 OS=Mus musculus OX=10090 GN=Mapre3 F     | 0.94        |
| Cbx3     | P23198 | Chromobox protein homolog 3 OS=Mus musculus OX=10090 GN=Cbx3 PE=1 SV=2                        | 0.9         |
| Tor1aip2 | Q8BYU6 | Torsin-1A-interacting protein 2 OS=Mus musculus OX=10090 GN=Tor1aip2 PE=1 SV=1                | 0.93        |
| Rab35    | Q6PHN9 | Ras-related protein Rab-35 OS=Mus musculus OX=10090 GN=Rab35 PE=1 SV=1                        | 0.916666667 |
| Kif1c    | O35071 | Kinesin-like protein KIF1C OS=Mus musculus OX=10090 GN=Kif1c PE=1 SV=2                        | 1.465       |
| Tmed4    | Q8R1V4 | Transmembrane emp24 domain-containing protein 4 OS=Mus musculus OX=10090 GN=Tmed4 PE=         | 0.853333333 |
| Scaf4    | Q7TSH6 | SR-related and CTD-associated factor 4 OS=Mus musculus OX=10090 GN=Scaf4 PE=1 SV=1            | 1.246666667 |
| Kif1b    | Q60575 | Kinesin-like protein KIF1B OS=Mus musculus OX=10090 GN=Kif1b PE=1 SV=2                        | 1.996666667 |
| Cbx1     | P83917 | Chromobox protein homolog 1 OS=Mus musculus OX=10090 GN=Cbx1 PE=1 SV=1                        | 0.976666667 |
| Ppp4r3b  | Q922R5 | Serine/threonine-protein phosphatase 4 regulatory subunit 3B OS=Mus musculus OX=10090 GN=Pp   | 1.01        |
| Smarcd1  | Q61466 | SWI/SNF-related matrix-associated actin-dependent regulator of chromatin subfamily D member 1 | 1.436666667 |
| Foxp1    | P58462 | Forkhead box protein P1 OS=Mus musculus OX=10090 GN=Foxp1 PE=1 SV=1                           | 0.896666667 |
| Gyg1     | Q9R062 | Glycogenin-1 OS=Mus musculus OX=10090 GN=Gyg1 PE=1 SV=3                                       | 0.843333333 |
| H1-5     | P43276 | Histone H1.5 OS=Mus musculus OX=10090 GN=H1-5 PE=1 SV=2                                       | 0.81        |
| Dip2a    | Q8BWT5 | Disco-interacting protein 2 homolog A OS=Mus musculus OX=10090 GN=Dip2a PE=1 SV=3             | 1.056666667 |
| Atp6v0a1 | Q9Z1G4 | V-type proton ATPase 116 kDa subunit a1 OS=Mus musculus OX=10090 GN=Atp6v0a1 PE=1 SV=3        | 0.936666667 |
| Otud7b   | B2RUR8 | OTU domain-containing protein 7B OS=Mus musculus OX=10090 GN=Otud7b PE=1 SV=1                 | 0.943333333 |
| Cdk13    | Q69ZA1 | Cyclin-dependent kinase 13 OS=Mus musculus OX=10090 GN=Cdk13 PE=1 SV=3                        | 1.443333333 |

|          |        |                                                                                                                 |             |
|----------|--------|-----------------------------------------------------------------------------------------------------------------|-------------|
| Tra2a    | Q6PFR5 | Transformer-2 protein homolog alpha OS=Mus musculus OX=10090 GN=Tra2a PE=1 SV=1                                 | 1           |
| Unc119b  | Q8C4B4 | Protein unc-119 homolog B OS=Mus musculus OX=10090 GN=Unc119b PE=1 SV=1                                         | 1.163333333 |
| Pip4p2   | Q9CZX7 | Type 2 phosphatidylinositol 4 5-bisphosphate 4-phosphatase OS=Mus musculus OX=10090 GN=Pip4p2 PE=1 SV=1         | 0.726666667 |
| Tulp3    | O88413 | Tubby-related protein 3 OS=Mus musculus OX=10090 GN=Tulp3 PE=1 SV=1                                             | 1.623333333 |
| Cyld     | Q80TQ2 | Ubiquitin carboxyl-terminal hydrolase CYLD OS=Mus musculus OX=10090 GN=Cyld PE=1 SV=2                           | 1.19        |
| Ncs1     | Q8BNY6 | Neuronal calcium sensor 1 OS=Mus musculus OX=10090 GN=Ncs1 PE=1 SV=3                                            | 2.213333333 |
| Mrtfa    | Q8K4J6 | Myocardin-related transcription factor A OS=Mus musculus OX=10090 GN=Mrtfa PE=1 SV=2                            | 1.266666667 |
| Abr      | Q5SSL4 | Active breakpoint cluster region-related protein OS=Mus musculus OX=10090 GN=Abr PE=1 SV=1                      | 0.786666667 |
| Ncor1    | Q60974 | Nuclear receptor corepressor 1 OS=Mus musculus OX=10090 GN=Ncor1 PE=1 SV=1                                      | 0.795       |
| Dhx8     | A2A4P0 | ATP-dependent RNA helicase DHX8 OS=Mus musculus OX=10090 GN=Dhx8 PE=2 SV=1                                      | 0.923333333 |
| Tbc1d1   | Q60949 | TBC1 domain family member 1 OS=Mus musculus OX=10090 GN=Tbc1d1 PE=1 SV=3                                        | 0.836666667 |
| Gmpr2    | Q99L27 | GMP reductase 2 OS=Mus musculus OX=10090 GN=Gmpr2 PE=1 SV=2                                                     | 0.55        |
| Fcsk     | Q7TMC8 | L-fucose kinase OS=Mus musculus OX=10090 GN=Fcsk PE=1 SV=1                                                      | 0.92        |
| Cltb     | Q6IRU5 | Clathrin light chain B OS=Mus musculus OX=10090 GN=Cltb PE=1 SV=1                                               | 1.043333333 |
| Hspbap1  | Q8BK58 | HSPB1-associated protein 1 OS=Mus musculus OX=10090 GN=Hspbap1 PE=1 SV=2                                        | 0.86        |
| Rpl12    | P35979 | 60S ribosomal protein L12 OS=Mus musculus OX=10090 GN=Rpl12 PE=1 SV=2                                           | 0.876666667 |
| S100a10  | P08207 | Protein S100-A10 OS=Mus musculus OX=10090 GN=S100a10 PE=1 SV=2                                                  | 0.953333333 |
| ATP5IF1  | O35143 | ATPase inhibitor mitochondrial OS=Mus musculus OX=10090 GN=ATP5IF1 PE=1 SV=2                                    | 0.92        |
| Basp1    | Q91XV3 | Brain acid soluble protein 1 OS=Mus musculus OX=10090 GN=Basp1 PE=1 SV=3                                        | 0.73        |
| Npm3     | Q9CPP0 | Nucleoplasmin-3 OS=Mus musculus OX=10090 GN=Npm3 PE=1 SV=3                                                      | 0.87        |
| Fkbp1a   | P26883 | Peptidyl-prolyl cis-trans isomerase FKBP1A OS=Mus musculus OX=10090 GN=Fkbp1a PE=1 SV=2                         | 0.89        |
| Hadh     | Q61425 | Hydroxyacyl-coenzyme A dehydrogenase mitochondrial OS=Mus musculus OX=10090 GN=Hadh PE=1 SV=1                   | 1.02        |
| Itgb5    | O70309 | Integrin beta-5 OS=Mus musculus OX=10090 GN=Itgb5 PE=1 SV=2                                                     | 1.106666667 |
| Heatr6   | Q6P1G0 | HEAT repeat-containing protein 6 OS=Mus musculus OX=10090 GN=Heatr6 PE=1 SV=1                                   | 0.803333333 |
| Sra1     | Q80VJ2 | Steroid receptor RNA activator 1 OS=Mus musculus OX=10090 GN=Sra1 PE=1 SV=3                                     | 0.903333333 |
| Tmem263  | Q9DAM7 | Transmembrane protein 263 OS=Mus musculus OX=10090 GN=Tmem263 PE=1 SV=1                                         | 0.853333333 |
| Apool    | Q78IK4 | MICOS complex subunit Mic27 OS=Mus musculus OX=10090 GN=Apool PE=1 SV=1                                         | 0.786666667 |
| Rpl21    | O09167 | 60S ribosomal protein L21 OS=Mus musculus OX=10090 GN=Rpl21 PE=1 SV=3                                           | 0.923333333 |
| Alb      | P07724 | Albumin OS=Mus musculus OX=10090 GN=Alb PE=1 SV=3                                                               | 0.016666667 |
| Cpox     | P36552 | Oxygen-dependent coproporphyrinogen-III oxidase mitochondrial OS=Mus musculus OX=10090 GN=Cpox PE=1 SV=1        | 0.94        |
| Snrpd3   | P62320 | Small nuclear ribonucleoprotein Sm D3 OS=Mus musculus OX=10090 GN=Snrpd3 PE=1 SV=1                              | 1.043333333 |
| Osbpl9   | A2A8Z1 | Oxysterol-binding protein-related protein 9 OS=Mus musculus OX=10090 GN=Osbpl9 PE=1 SV=1                        | 0.813333333 |
| C1qbp    | O35658 | Complement component 1 Q subcomponent-binding protein mitochondrial OS=Mus musculus OX=10090 GN=C1qbp PE=1 SV=1 | 0.903333333 |
| Atp6v1g1 | Q9CR51 | V-type proton ATPase subunit G 1 OS=Mus musculus OX=10090 GN=Atp6v1g1 PE=1 SV=3                                 | 0.916666667 |

|          |        |                                                                                                               |             |
|----------|--------|---------------------------------------------------------------------------------------------------------------|-------------|
| Rnf126   | Q91YL2 | E3 ubiquitin-protein ligase RNF126 OS=Mus musculus OX=10090 GN=Rnf126 PE=1 SV=1                               | 1.07        |
| Rpl37a   | P61514 | 60S ribosomal protein L37a OS=Mus musculus OX=10090 GN=Rpl37a PE=1 SV=2                                       | 0.94        |
| Znf330   | Q922H9 | Zinc finger protein 330 OS=Mus musculus OX=10090 GN=Znf330 PE=1 SV=1                                          | 0.75        |
| Akap9    | Q70FJ1 | A-kinase anchor protein 9 OS=Mus musculus OX=10090 GN=Akap9 PE=1 SV=2                                         | 1.07        |
| Banf1    | O54962 | Barrier-to-autointegration factor OS=Mus musculus OX=10090 GN=Banf1 PE=1 SV=1                                 | 0.85        |
| Ppp1r14b | Q62084 | Protein phosphatase 1 regulatory subunit 14B OS=Mus musculus OX=10090 GN=Ppp1r14b PE=1 SV=1                   | 0.86        |
| Clns1a   | Q61189 | Methylosome subunit pICln OS=Mus musculus OX=10090 GN=Clns1a PE=1 SV=1                                        | 0.926666667 |
| Med12    | A2AGH6 | Mediator of RNA polymerase II transcription subunit 12 OS=Mus musculus OX=10090 GN=Med12 PE=1 SV=1            | 1.5         |
| Rbms2    | Q8VC70 | RNA-binding motif single-stranded-interacting protein 2 OS=Mus musculus OX=10090 GN=Rbms2 PE=1 SV=1           | 0.88        |
| Arhgdib  | Q61599 | Rho GDP-dissociation inhibitor 2 OS=Mus musculus OX=10090 GN=Arhgdib PE=1 SV=3                                | 0.926666667 |
| Pxdn     | Q3UQ28 | Peroxidasin homolog OS=Mus musculus OX=10090 GN=Pxdn PE=1 SV=2                                                | 0.656666667 |
| Cggbp1   | Q8BHG9 | CGG triplet repeat-binding protein 1 OS=Mus musculus OX=10090 GN=Cggbp1 PE=1 SV=1                             | 0.946666667 |
| Nop16    | Q9CPT5 | Nucleolar protein 16 OS=Mus musculus OX=10090 GN=Nop16 PE=1 SV=1                                              | 1.03        |
| Tmed2    | Q9R0Q3 | Transmembrane emp24 domain-containing protein 2 OS=Mus musculus OX=10090 GN=Tmed2 PE=1 SV=1                   | 0.853333333 |
| Eif2b1   | Q99LC8 | Translation initiation factor eIF-2B subunit alpha OS=Mus musculus OX=10090 GN=Eif2b1 PE=1 SV=1               | 0.956666667 |
| Pdcd10   | Q8VE70 | Programmed cell death protein 10 OS=Mus musculus OX=10090 GN=Pdcd10 PE=1 SV=1                                 | 0.83        |
| Msmo1    | Q9CRA4 | Methylsterol monooxygenase 1 OS=Mus musculus OX=10090 GN=Msmo1 PE=1 SV=1                                      | 0.876666667 |
| Kdm2a    | P59997 | Lysine-specific demethylase 2A OS=Mus musculus OX=10090 GN=Kdm2a PE=1 SV=2                                    | 0.906666667 |
| Poglut3  | G5E897 | Protein O-glucosyltransferase 3 OS=Mus musculus OX=10090 GN=Poglut3 PE=1 SV=1                                 | 1.19        |
| Timm50   | Q9D880 | Mitochondrial import inner membrane translocase subunit TIM50 OS=Mus musculus OX=10090 GN=Timm50 PE=1 SV=1    | 0.826666667 |
| Wasl     | Q91YD9 | Neural Wiskott-Aldrich syndrome protein OS=Mus musculus OX=10090 GN=Wasl PE=1 SV=1                            | 0.926666667 |
| Rpl14    | Q9CR57 | 60S ribosomal protein L14 OS=Mus musculus OX=10090 GN=Rpl14 PE=1 SV=3                                         | 0.913333333 |
| Pura     | P42669 | Transcriptional activator protein Pur-alpha OS=Mus musculus OX=10090 GN=Pura PE=1 SV=1                        | 0.873333333 |
| Gss      | P51855 | Glutathione synthetase OS=Mus musculus OX=10090 GN=Gss PE=1 SV=1                                              | 1.016666667 |
| Rps13    | P62301 | 40S ribosomal protein S13 OS=Mus musculus OX=10090 GN=Rps13 PE=1 SV=2                                         | 0.89        |
| Timm13   | P62075 | Mitochondrial import inner membrane translocase subunit Tim13 OS=Mus musculus OX=10090 GN=Timm13 PE=1 SV=1    | 0.886666667 |
| Slc2a1   | P17809 | Solute carrier family 2 facilitated glucose transporter member 1 OS=Mus musculus OX=10090 GN=Slc2a1 PE=1 SV=1 | 0.936666667 |
| Phactr4  | Q501J7 | Phosphatase and actin regulator 4 OS=Mus musculus OX=10090 GN=Phactr4 PE=1 SV=2                               | 0.75        |
| Gja1     | P23242 | Gap junction alpha-1 protein OS=Mus musculus OX=10090 GN=Gja1 PE=1 SV=2                                       | 1.12        |
| Stambp   | Q9CQ26 | STAM-binding protein OS=Mus musculus OX=10090 GN=Stambp PE=1 SV=1                                             | 0.85        |
| Cox6a1   | P43024 | Cytochrome c oxidase subunit 6A1 mitochondrial OS=Mus musculus OX=10090 GN=Cox6a1 PE=1 SV=1                   | 0.863333333 |
| Bccip    | Q9CWI3 | BRCA2 and CDKN1A-interacting protein OS=Mus musculus OX=10090 GN=Bccip PE=1 SV=1                              | 0.92        |
| Cog3     | Q8CI04 | Conserved oligomeric Golgi complex subunit 3 OS=Mus musculus OX=10090 GN=Cog3 PE=1 SV=3                       | 0.78        |
| Sorbs3   | Q9R1Z8 | Vinexin OS=Mus musculus OX=10090 GN=Sorbs3 PE=1 SV=1                                                          | 0.923333333 |



|         |        |                                                                                                                               |
|---------|--------|-------------------------------------------------------------------------------------------------------------------------------|
| Gatd3a  | Q9D172 | Glutamine amidotransferase-like class 1 domain-containing protein 3A mitochondrial OS=Mus mus: 0.856666667                    |
| Rfx1    | P48377 | MHC class II regulatory factor RFX1 OS=Mus musculus OX=10090 GN=Rfx1 PE=1 SV=2 1.22                                           |
| Scamp3  | O35609 | Secretory carrier-associated membrane protein 3 OS=Mus musculus OX=10090 GN=Scamp3 PE=1 SV=0.9                                |
| Eipr1   | Q8K0G5 | EARP and GARP complex-interacting protein 1 OS=Mus musculus OX=10090 GN=Eipr1 PE=1 SV=2 0.896666667                           |
| Trmt61a | Q80XC2 | tRNA (adenine(58)-N(1))-methyltransferase catalytic subunit TRMT61A OS=Mus musculus OX=10090 GN=Trmt61a PE=1 SV=1 0.863333333 |
| Cgnl1   | Q6AW69 | Cingulin-like protein 1 OS=Mus musculus OX=10090 GN=Cgnl1 PE=1 SV=2 1.15                                                      |
| Wdr5    | P61965 | WD repeat-containing protein 5 OS=Mus musculus OX=10090 GN=Wdr5 PE=1 SV=1 0.76                                                |
| Ndufv2  | Q9D6J6 | NADH dehydrogenase [ubiquinone] flavoprotein 2 mitochondrial OS=Mus musculus OX=10090 GN=Ndufv2 PE=1 SV=1 0.753333333         |
| Stim2   | P83093 | Stromal interaction molecule 2 OS=Mus musculus OX=10090 GN=Stim2 PE=1 SV=2 0.843333333                                        |
| Il1rl1  | P14719 | Interleukin-1 receptor-like 1 OS=Mus musculus OX=10090 GN=Il1rl1 PE=1 SV=2 0.893333333                                        |
| Ppil2   | Q9D787 | RING-type E3 ubiquitin-protein ligase PPIL2 OS=Mus musculus OX=10090 GN=Ppil2 PE=1 SV=2 0.883333333                           |
| Grb14   | Q9JLM9 | Growth factor receptor-bound protein 14 OS=Mus musculus OX=10090 GN=Grb14 PE=1 SV=1 0.913333333                               |
| Dhcr24  | Q8VCH6 | Delta(24)-sterol reductase OS=Mus musculus OX=10090 GN=Dhcr24 PE=1 SV=1 0.983333333                                           |
| Cbr4    | Q91VT4 | Carbonyl reductase family member 4 OS=Mus musculus OX=10090 GN=Cbr4 PE=1 SV=2 1.023333333                                     |
| Kctd5   | Q8VC57 | BTB/POZ domain-containing protein KCTD5 OS=Mus musculus OX=10090 GN=Kctd5 PE=1 SV=1 0.926666667                               |
| Jmjd6   | Q9ERI5 | Bifunctional arginine demethylase and lysyl-hydroxylase JMJD6 OS=Mus musculus OX=10090 GN=Jmjd6 PE=1 SV=1 0.916666667         |
| Lsm2    | O35900 | U6 snRNA-associated Sm-like protein LSM2 OS=Mus musculus OX=10090 GN=Lsm2 PE=1 SV=1 0.843333333                               |
| Slc16a1 | P53986 | Monocarboxylate transporter 1 OS=Mus musculus OX=10090 GN=Slc16a1 PE=1 SV=1 0.876666667                                       |
| Diexf   | Q8BTT6 | Digestive organ expansion factor homolog OS=Mus musculus OX=10090 GN=Diexf PE=2 SV=2 1.116666667                              |
| Fbxo22  | Q78JE5 | F-box only protein 22 OS=Mus musculus OX=10090 GN=Fbxo22 PE=1 SV=2 0.786666667                                                |
| Naxe    | Q8K4Z3 | NAD(P)H-hydrate epimerase OS=Mus musculus OX=10090 GN=Naxe PE=1 SV=1 0.823333333                                              |
| Cdc73   | Q8JZM7 | Parafibromin OS=Mus musculus OX=10090 GN=Cdc73 PE=1 SV=1 0.986666667                                                          |
| Dnph1   | Q80VJ3 | 2'-deoxynucleoside 5'-phosphate N-hydrolase 1 OS=Mus musculus OX=10090 GN=Dnph1 PE=1 SV=2 1.01                                |
| Mtmt6   | Q8VE11 | Myotubularin-related protein 6 OS=Mus musculus OX=10090 GN=Mtmt6 PE=1 SV=1 1.373333333                                        |
| Paf1    | Q8K2T8 | RNA polymerase II-associated factor 1 homolog OS=Mus musculus OX=10090 GN=Paf1 PE=1 SV=1 0.843333333                          |
| Cfap36  | Q8C6E0 | Cilia- and flagella-associated protein 36 OS=Mus musculus OX=10090 GN=Cfap36 PE=1 SV=1 1.043333333                            |
| Mrps2   | Q924T2 | 28S ribosomal protein S2 mitochondrial OS=Mus musculus OX=10090 GN=Mrps2 PE=1 SV=1 0.863333333                                |
| Ripk3   | Q9QZL0 | Receptor-interacting serine/threonine-protein kinase 3 OS=Mus musculus OX=10090 GN=Ripk3 PE=1 SV=1 0.906666667                |
| Polr2c  | P97760 | DNA-directed RNA polymerase II subunit RPB3 OS=Mus musculus OX=10090 GN=Polr2c PE=1 SV=2 0.833333333                          |
| Yif1b   | Q9CX30 | Protein YIF1B OS=Mus musculus OX=10090 GN=Yif1b PE=1 SV=2 0.796666667                                                         |
| Man2c1  | Q91W89 | Alpha-mannosidase 2C1 OS=Mus musculus OX=10090 GN=Man2c1 PE=1 SV=1 1.59                                                       |
| Poglut1 | Q8BYB9 | Protein O-glucosyltransferase 1 OS=Mus musculus OX=10090 GN=Poglut1 PE=1 SV=2 0.963333333                                     |
| Itga6   | Q61739 | Integrin alpha-6 OS=Mus musculus OX=10090 GN=Itga6 PE=1 SV=3 0.746666667                                                      |
| Fam3c   | Q91VU0 | Protein FAM3C OS=Mus musculus OX=10090 GN=Fam3c PE=1 SV=1 0.98                                                                |

|          |        |                                                                                                    |             |
|----------|--------|----------------------------------------------------------------------------------------------------|-------------|
| Ppil3    | Q9D6L8 | Peptidyl-prolyl cis-trans isomerase-like 3 OS=Mus musculus OX=10090 GN=Ppil3 PE=1 SV=1             | 0.886666667 |
| Babam2   | Q8K3W0 | BRISC and BRCA1-A complex member 2 OS=Mus musculus OX=10090 GN=Babam2 PE=1 SV=2                    | 0.986666667 |
| Mrpl12   | Q9DB15 | 39S ribosomal protein L12 mitochondrial OS=Mus musculus OX=10090 GN=Mrpl12 PE=1 SV=2               | 0.856666667 |
| Mtch1    | Q791T5 | Mitochondrial carrier homolog 1 OS=Mus musculus OX=10090 GN=Mtch1 PE=1 SV=1                        | 0.843333333 |
| Atg3     | Q9CPX6 | Ubiquitin-like-conjugating enzyme ATG3 OS=Mus musculus OX=10090 GN=Atg3 PE=1 SV=1                  | 0.84        |
| Bola2    | Q8BGS2 | Bola-like protein 2 OS=Mus musculus OX=10090 GN=Bola2 PE=1 SV=1                                    | 0.94        |
| Exosc9   | Q9JHI7 | Exosome complex component RRP45 OS=Mus musculus OX=10090 GN=Exosc9 PE=1 SV=1                       | 0.903333333 |
| Rer1     | Q9CQU3 | Protein RER1 OS=Mus musculus OX=10090 GN=Rer1 PE=1 SV=1                                            | 0.836666667 |
| Arhgef10 | Q8C033 | Rho guanine nucleotide exchange factor 10 OS=Mus musculus OX=10090 GN=Arhgef10 PE=1 SV=2           | 0.88        |
| Ppp6c    | Q9CQR6 | Serine/threonine-protein phosphatase 6 catalytic subunit OS=Mus musculus OX=10090 GN=Ppp6c         | 0.99        |
| Exosc2   | Q8VBV3 | Exosome complex component RRP4 OS=Mus musculus OX=10090 GN=Exosc2 PE=1 SV=1                        | 0.876666667 |
| Vps16    | Q920Q4 | Vacuolar protein sorting-associated protein 16 homolog OS=Mus musculus OX=10090 GN=Vps16 PE=1 SV=1 | 1.166666667 |
| Naf1     | Q3UMQ8 | H/ACA ribonucleoprotein complex non-core subunit NAF1 OS=Mus musculus OX=10090 GN=Naf1 PE=1 SV=1   | 0.76        |
| Ccdc58   | Q8R3Q6 | Coiled-coil domain-containing protein 58 OS=Mus musculus OX=10090 GN=Ccdc58 PE=1 SV=1              | 0.913333333 |
| Pdcd5    | P56812 | Programmed cell death protein 5 OS=Mus musculus OX=10090 GN=Pdcd5 PE=1 SV=3                        | 0.93        |
| Slc4a7   | Q8BTY2 | Sodium bicarbonate cotransporter 3 OS=Mus musculus OX=10090 GN=Slc4a7 PE=1 SV=2                    | 0.953333333 |
| Smn1     | P97801 | Survival motor neuron protein OS=Mus musculus OX=10090 GN=Smn1 PE=1 SV=1                           | 0.876666667 |
| Prkra    | Q9WTX2 | Interferon-inducible double-stranded RNA-dependent protein kinase activator A OS=Mus musculus      | 0.963333333 |
| Znf207   | Q9JMD0 | BUB3-interacting and GLEBS motif-containing protein ZNF207 OS=Mus musculus OX=10090 GN=Znf207      | 0.906666667 |
| Ldlr     | P35951 | Low-density lipoprotein receptor OS=Mus musculus OX=10090 GN=Ldlr PE=1 SV=2                        | 0.896666667 |
| Arl6ip5  | Q8R5J9 | PRA1 family protein 3 OS=Mus musculus OX=10090 GN=Arl6ip5 PE=1 SV=2                                | 0.896666667 |
| Prpf39   | Q8K2Z2 | Pre-mRNA-processing factor 39 OS=Mus musculus OX=10090 GN=Prpf39 PE=1 SV=3                         | 1.326666667 |
| Exosc6   | Q8BTW3 | Exosome complex component MTR3 OS=Mus musculus OX=10090 GN=Exosc6 PE=1 SV=1                        | 0.813333333 |
| Ate1     | Q9Z2A5 | Arginyl-tRNA--protein transferase 1 OS=Mus musculus OX=10090 GN=Ate1 PE=1 SV=2                     | 0.883333333 |
| Pdpk1    | Q9Z2A0 | 3-phosphoinositide-dependent protein kinase 1 OS=Mus musculus OX=10090 GN=Pdpk1 PE=1 SV=2          | 0.906666667 |
| Zmym4    | A2A791 | Zinc finger MYM-type protein 4 OS=Mus musculus OX=10090 GN=Zmym4 PE=1 SV=1                         | 1.4         |
| Gnpat    | P98192 | Dihydroxyacetone phosphate acyltransferase OS=Mus musculus OX=10090 GN=Gnpat PE=1 SV=1             | 2.823333333 |
| Polr2d   | Q9D7M8 | DNA-directed RNA polymerase II subunit RPB4 OS=Mus musculus OX=10090 GN=Polr2d PE=1 SV=2           | 1.086666667 |
| Cd2bp2   | Q9CWK3 | CD2 antigen cytoplasmic tail-binding protein 2 OS=Mus musculus OX=10090 GN=Cd2bp2 PE=1 SV=1        | 1.183333333 |
| Ppie     | Q9QZH3 | Peptidyl-prolyl cis-trans isomerase E OS=Mus musculus OX=10090 GN=Ppie PE=1 SV=2                   | 0.883333333 |
| Gmfb     | Q9CQI3 | Glia maturation factor beta OS=Mus musculus OX=10090 GN=Gmfb PE=1 SV=3                             | 0.903333333 |
| Lsm14a   | Q8K2F8 | Protein LSM14 homolog A OS=Mus musculus OX=10090 GN=Lsm14a PE=1 SV=1                               | 0.933333333 |
| Napg     | Q9CWZ7 | Gamma-soluble NSF attachment protein OS=Mus musculus OX=10090 GN=Napg PE=1 SV=1                    | 1.236666667 |
| Sqle     | P52019 | Squalene monooxygenase OS=Mus musculus OX=10090 GN=Sqle PE=2 SV=1                                  | 0.91        |

|           |        |                                                                                                         |             |
|-----------|--------|---------------------------------------------------------------------------------------------------------|-------------|
| Pex3      | Q9QXY9 | Peroxisomal biogenesis factor 3 OS=Mus musculus OX=10090 GN=Pex3 PE=1 SV=1                              | 1.083333333 |
| Diablo    | Q9JIQ3 | Diablo homolog mitochondrial OS=Mus musculus OX=10090 GN=Diablo PE=1 SV=2                               | 0.846666667 |
| Ap3s1     | Q9DCR2 | AP-3 complex subunit sigma-1 OS=Mus musculus OX=10090 GN=Ap3s1 PE=1 SV=2                                | 0.92        |
| Ccnt1     | Q9QWV9 | Cyclin-T1 OS=Mus musculus OX=10090 GN=Ccnt1 PE=1 SV=3                                                   | 1.196666667 |
| Mettl1    | Q9Z120 | tRNA (guanine-N(7)-)-methyltransferase OS=Mus musculus OX=10090 GN=Mettl1 PE=1 SV=1                     | 0.866666667 |
| Magohb    | Q9CQL1 | Protein mago nashi homolog 2 OS=Mus musculus OX=10090 GN=Magohb PE=2 SV=1                               | 0.87        |
| Magoh     | P61327 | Protein mago nashi homolog OS=Mus musculus OX=10090 GN=Magoh PE=2 SV=1                                  | 0.87        |
| Atp1b1    | P14094 | Sodium/potassium-transporting ATPase subunit beta-1 OS=Mus musculus OX=10090 GN=Atp1b1 PE=1 SV=1        | 0.96        |
| Eif4enif1 | Q9EST3 | Eukaryotic translation initiation factor 4E transporter OS=Mus musculus OX=10090 GN=Eif4enif1 PE=1 SV=1 | 0.886666667 |
| Snx18     | Q91ZR2 | Sorting nexin-18 OS=Mus musculus OX=10090 GN=Snx18 PE=1 SV=1                                            | 0.943333333 |
| Prpf38a   | Q4FK66 | Pre-mRNA-splicing factor 38A OS=Mus musculus OX=10090 GN=Prpf38a PE=1 SV=1                              | 1.153333333 |
| Znf280c   | Q6P3Y5 | Zinc finger protein 280C OS=Mus musculus OX=10090 GN=Znf280c PE=1 SV=1                                  | 0.95        |
| Loxl3     | Q9Z175 | Lysyl oxidase homolog 3 OS=Mus musculus OX=10090 GN=Loxl3 PE=1 SV=2                                     | 0.936666667 |
| Pon2      | Q62086 | Serum paraoxonase/arylesterase 2 OS=Mus musculus OX=10090 GN=Pon2 PE=1 SV=2                             | 0.72        |
| Lpcat1    | Q3TFD2 | Lysophosphatidylcholine acyltransferase 1 OS=Mus musculus OX=10090 GN=Lpcat1 PE=1 SV=1                  | 0.783333333 |
| Atg5      | Q99J83 | Autophagy protein 5 OS=Mus musculus OX=10090 GN=Atg5 PE=1 SV=1                                          | 1.246666667 |
| Brcc3     | P46737 | Lys-63-specific deubiquitinase BRCC36 OS=Mus musculus OX=10090 GN=Brcc3 PE=1 SV=1                       | 0.72        |
| Atm       | Q62388 | Serine-protein kinase ATM OS=Mus musculus OX=10090 GN=Atm PE=1 SV=2                                     | 0.696666667 |
| Nol8      | Q3UHX0 | Nucleolar protein 8 OS=Mus musculus OX=10090 GN=Nol8 PE=1 SV=2                                          | 0.726666667 |
| Ccdc86    | Q9JJ89 | Coiled-coil domain-containing protein 86 OS=Mus musculus OX=10090 GN=Ccdc86 PE=1 SV=2                   | 0.823333333 |
| Ssbp1     | Q9CYR0 | Single-stranded DNA-binding protein mitochondrial OS=Mus musculus OX=10090 GN=Ssbp1 PE=1 SV=1           | 0.946666667 |
| Ubr7      | Q8BU04 | Putative E3 ubiquitin-protein ligase UBR7 OS=Mus musculus OX=10090 GN=Ubr7 PE=1 SV=1                    | 1.34        |
| Stmn1     | P54227 | Stathmin OS=Mus musculus OX=10090 GN=Stmn1 PE=1 SV=2                                                    | 0.863333333 |
| Lamtor1   | Q9CQ22 | Ragulator complex protein LAMTOR1 OS=Mus musculus OX=10090 GN=Lamtor1 PE=1 SV=1                         | 0.933333333 |
| Man2b2    | O54782 | Epididymis-specific alpha-mannosidase OS=Mus musculus OX=10090 GN=Man2b2 PE=1 SV=2                      | 0.713333333 |
| Mydgf     | Q9CPT4 | Myeloid-derived growth factor OS=Mus musculus OX=10090 GN=Mydgf PE=1 SV=1                               | 0.84        |
| Mtmt3     | Q8K296 | Myotubularin-related protein 3 OS=Mus musculus OX=10090 GN=Mtmt3 PE=1 SV=2                              | 1.16        |
| Slc25a1   | Q8JZU2 | Tricarboxylate transport protein mitochondrial OS=Mus musculus OX=10090 GN=Slc25a1 PE=1 SV=1            | 0.873333333 |
| Mrps18b   | Q99N84 | 28S ribosomal protein S18b mitochondrial OS=Mus musculus OX=10090 GN=Mrps18b PE=1 SV=1                  | 0.903333333 |
| Pmm2      | Q9Z2M7 | Phosphomannomutase 2 OS=Mus musculus OX=10090 GN=Pmm2 PE=1 SV=1                                         | 0.92        |
| Tut1      | Q8R3F9 | Speckle targeted PIP5K1A-regulated poly(A) polymerase OS=Mus musculus OX=10090 GN=Tut1 PE=1 SV=1        | 0.9         |
| Hmmr      | Q00547 | Hyaluronan mediated motility receptor OS=Mus musculus OX=10090 GN=Hmmr PE=1 SV=4                        | 0.876666667 |
| Pfdn2     | O70591 | Prefoldin subunit 2 OS=Mus musculus OX=10090 GN=Pfdn2 PE=1 SV=2                                         | 0.903333333 |
| Trip4     | Q9QXN3 | Activating signal cointegrator 1 OS=Mus musculus OX=10090 GN=Trip4 PE=1 SV=2                            | 0.836666667 |

|          |        |                                                                                                    |             |
|----------|--------|----------------------------------------------------------------------------------------------------|-------------|
| Gins4    | Q99LZ3 | DNA replication complex GINS protein SLD5 OS=Mus musculus OX=10090 GN=Gins4 PE=1 SV=1              | 1.163333333 |
| Amfr     | Q9R049 | E3 ubiquitin-protein ligase AMFR OS=Mus musculus OX=10090 GN=Amfr PE=1 SV=2                        | 0.656666667 |
| Ints5    | Q8CHT3 | Integrator complex subunit 5 OS=Mus musculus OX=10090 GN=Ints5 PE=2 SV=1                           | 1.253333333 |
| Thyn1    | Q91YJ3 | Thymocyte nuclear protein 1 OS=Mus musculus OX=10090 GN=Thyn1 PE=1 SV=1                            | 1.046666667 |
| Sdc4     | O35988 | Syndecan-4 OS=Mus musculus OX=10090 GN=Sdc4 PE=1 SV=1                                              | 0.96        |
| Gtf3c2   | Q8BL74 | General transcription factor 3C polypeptide 2 OS=Mus musculus OX=10090 GN=Gtf3c2 PE=2 SV=2         | 0.863333333 |
| Ndufa8   | Q9DCJ5 | NADH dehydrogenase [ubiquinone] 1 alpha subcomplex subunit 8 OS=Mus musculus OX=10090 GN=          | 0.796666667 |
| Gins3    | Q9CY94 | DNA replication complex GINS protein PSF3 OS=Mus musculus OX=10090 GN=Gins3 PE=2 SV=1              | 0.913333333 |
| Trim25   | Q61510 | E3 ubiquitin/ISG15 ligase TRIM25 OS=Mus musculus OX=10090 GN=Trim25 PE=1 SV=2                      | 1.38        |
| Polr2h   | Q923G2 | DNA-directed RNA polymerases I II and III subunit RPABC3 OS=Mus musculus OX=10090 GN=Polr2h        | 0.993333333 |
| Cpe      | Q00493 | Carboxypeptidase E OS=Mus musculus OX=10090 GN=Cpe PE=1 SV=2                                       | 0.996666667 |
| Ccdc50   | Q810U5 | Coiled-coil domain-containing protein 50 OS=Mus musculus OX=10090 GN=Ccdc50 PE=1 SV=1              | 0.773333333 |
| Cwc15    | Q9JHS9 | Spliceosome-associated protein CWC15 homolog OS=Mus musculus OX=10090 GN=Cwc15 PE=1 SV=1           | 1.006666667 |
| Bag1     | Q60739 | BAG family molecular chaperone regulator 1 OS=Mus musculus OX=10090 GN=Bag1 PE=1 SV=3              | 0.883333333 |
| Cers5    | Q9D6K9 | Ceramide synthase 5 OS=Mus musculus OX=10090 GN=Cers5 PE=1 SV=1                                    | 1.21        |
| Fam162a  | Q9D6U8 | Protein FAM162A OS=Mus musculus OX=10090 GN=Fam162a PE=1 SV=1                                      | 0.9         |
| Aftph    | Q80WT5 | Aftphilin OS=Mus musculus OX=10090 GN=Aftph PE=1 SV=2                                              | 0.973333333 |
| Hs2st1   | Q8R3H7 | Heparan sulfate 2-O-sulfotransferase 1 OS=Mus musculus OX=10090 GN=Hs2st1 PE=1 SV=2                | 0.683333333 |
| Gulp1    | Q8K2A1 | PTB domain-containing engulfment adapter protein 1 OS=Mus musculus OX=10090 GN=Gulp1 PE=1 SV=1     | 0.856666667 |
| Cda      | P56389 | Cytidine deaminase OS=Mus musculus OX=10090 GN=Cda PE=1 SV=2                                       | 0.853333333 |
| Vamp7    | P70280 | Vesicle-associated membrane protein 7 OS=Mus musculus OX=10090 GN=Vamp7 PE=1 SV=1                  | 0.846666667 |
| Ehbp1    | Q69ZW3 | EH domain-binding protein 1 OS=Mus musculus OX=10090 GN=Ehbp1 PE=1 SV=3                            | 1.296666667 |
| Lsm12    | Q9D0R8 | Protein LSM12 homolog OS=Mus musculus OX=10090 GN=Lsm12 PE=1 SV=1                                  | 0.866666667 |
| Stom     | P54116 | Erythrocyte band 7 integral membrane protein OS=Mus musculus OX=10090 GN=Stom PE=1 SV=3            | 0.946666667 |
| Gtf2e1   | Q9D0D5 | General transcription factor IIE subunit 1 OS=Mus musculus OX=10090 GN=Gtf2e1 PE=1 SV=1            | 0.976666667 |
| Ankrd13a | Q80UP5 | Ankyrin repeat domain-containing protein 13A OS=Mus musculus OX=10090 GN=Ankrd13a PE=1 SV=1        | 0.893333333 |
| Med15    | Q924H2 | Mediator of RNA polymerase II transcription subunit 15 OS=Mus musculus OX=10090 GN=Med15 PE=1 SV=1 | 0.77        |
| Tex30    | Q3TUU5 | Testis-expressed protein 30 OS=Mus musculus OX=10090 GN=Tex30 PE=1 SV=1                            | 0.78        |
| Pja2     | Q80U04 | E3 ubiquitin-protein ligase Praja-2 OS=Mus musculus OX=10090 GN=Pja2 PE=1 SV=2                     | 0.703333333 |
| Sord     | Q64442 | Sorbitol dehydrogenase OS=Mus musculus OX=10090 GN=Sord PE=1 SV=3                                  | 0.68        |
| Gla      | P51569 | Alpha-galactosidase A OS=Mus musculus OX=10090 GN=Gla PE=1 SV=1                                    | 1.006666667 |
| Arhgap17 | Q3UIA2 | Rho GTPase-activating protein 17 OS=Mus musculus OX=10090 GN=Arhgap17 PE=1 SV=1                    | 1.01        |
| Myo1d    | Q5SYD0 | Unconventional myosin-Id OS=Mus musculus OX=10090 GN=Myo1d PE=1 SV=1                               | 0.726666667 |
| Plpp1    | Q61469 | Phospholipid phosphatase 1 OS=Mus musculus OX=10090 GN=Plpp1 PE=1 SV=1                             | 1.046666667 |

|          |        |                                                                                                                             |             |
|----------|--------|-----------------------------------------------------------------------------------------------------------------------------|-------------|
| Mrps23   | Q8VE22 | 28S ribosomal protein S23 mitochondrial OS=Mus musculus OX=10090 GN=Mrps23 PE=1 SV=1                                        | 0.906666667 |
| Tab1     | Q8CF89 | TGF-beta-activated kinase 1 and MAP3K7-binding protein 1 OS=Mus musculus OX=10090 GN=Tab1 PE=1 SV=1                         | 1.19        |
| Ddx41    | Q91VN6 | Probable ATP-dependent RNA helicase DDX41 OS=Mus musculus OX=10090 GN=Ddx41 PE=1 SV=2                                       | 1.006666667 |
| Aldh1a7  | O35945 | Aldehyde dehydrogenase cytosolic 1 OS=Mus musculus OX=10090 GN=Aldh1a7 PE=1 SV=1                                            | 0.923333333 |
| Epdr1    | Q99M71 | Mammalian ependymin-related protein 1 OS=Mus musculus OX=10090 GN=Epdr1 PE=1 SV=1                                           | 0.95        |
| Ep400    | Q8CHI8 | E1A-binding protein p400 OS=Mus musculus OX=10090 GN=Ep400 PE=1 SV=3                                                        | 0.543333333 |
| Armc6    | Q8BNU0 | Armadillo repeat-containing protein 6 OS=Mus musculus OX=10090 GN=Armc6 PE=1 SV=1                                           | 0.983333333 |
| Setd7    | Q8VHL1 | Histone-lysine N-methyltransferase SETD7 OS=Mus musculus OX=10090 GN=Setd7 PE=1 SV=2                                        | 1.033333333 |
| Tmem120a | Q8C1E7 | Ion channel TACAN OS=Mus musculus OX=10090 GN=Tmem120a PE=1 SV=1                                                            | 1.046666667 |
| Ppp1r2   | Q9DCL8 | Protein phosphatase inhibitor 2 OS=Mus musculus OX=10090 GN=Ppp1r2 PE=1 SV=3                                                | 0.78        |
| Efnb2    | P52800 | Ephrin-B2 OS=Mus musculus OX=10090 GN=Efnb2 PE=1 SV=1                                                                       | 0.973333333 |
| Dcaf1    | Q80TR8 | DDB1- and CUL4-associated factor 1 OS=Mus musculus OX=10090 GN=Dcaf1 PE=1 SV=4                                              | 0.753333333 |
| Smndc1   | Q8BGT7 | Survival of motor neuron-related-splicing factor 30 OS=Mus musculus OX=10090 GN=Smndc1 PE=1 SV=1                            | 0.836666667 |
| Palad1   | P70261 | Paladin OS=Mus musculus OX=10090 GN=Palad1 PE=1 SV=1                                                                        | 1.193333333 |
| Rpl35a   | O55142 | 60S ribosomal protein L35a OS=Mus musculus OX=10090 GN=Rpl35a PE=1 SV=2                                                     | 1.05        |
| Bnip1    | Q6QD59 | Vesicle transport protein SEC20 OS=Mus musculus OX=10090 GN=Bnip1 PE=1 SV=1                                                 | 0.796666667 |
| Ddx31    | Q6NZQ2 | Probable ATP-dependent RNA helicase DDX31 OS=Mus musculus OX=10090 GN=Ddx31 PE=2 SV=2                                       | 0.75        |
| Alg5     | Q9DB25 | Dolichyl-phosphate beta-glucosyltransferase OS=Mus musculus OX=10090 GN=Alg5 PE=1 SV=1                                      | 0.886666667 |
| Scarb2   | O35114 | Lysosome membrane protein 2 OS=Mus musculus OX=10090 GN=Scarb2 PE=1 SV=3                                                    | 0.766666667 |
| Ppip5k2  | Q6ZQB6 | Inositol hexakisphosphate and diphosphoinositol-pentakisphosphate kinase 2 OS=Mus musculus OX=10090 GN=Ppip5k2 PE=1 SV=1    | 0.94        |
| Trappc12 | Q8K2L8 | Trafficking protein particle complex subunit 12 OS=Mus musculus OX=10090 GN=Trappc12 PE=1 SV=1                              | 1.043333333 |
| Sh3bp4   | Q921I6 | SH3 domain-binding protein 4 OS=Mus musculus OX=10090 GN=Sh3bp4 PE=1 SV=1                                                   | 1.583333333 |
| Lias     | Q99M04 | Lipoyl synthase mitochondrial OS=Mus musculus OX=10090 GN=Lias PE=1 SV=1                                                    | 1.093333333 |
| Haus5    | Q9D786 | HAUS augmin-like complex subunit 5 OS=Mus musculus OX=10090 GN=Haus5 PE=1 SV=1                                              | 0.776666667 |
| Kctd10   | Q922M3 | BTB/POZ domain-containing adapter for CUL3-mediated RhoA degradation protein 3 OS=Mus musculus OX=10090 GN=Kctd10 PE=1 SV=1 | 0.896666667 |
| Rabgef1  | Q9JM13 | Rab5 GDP/GTP exchange factor OS=Mus musculus OX=10090 GN=Rabgef1 PE=1 SV=1                                                  | 1.076666667 |
| Pgs1     | Q8BHF7 | CDP-diacylglycerol--glycerol-3-phosphate 3-phosphatidyltransferase mitochondrial OS=Mus musculus OX=10090 GN=Pgs1 PE=1 SV=1 | 1.103333333 |
| Ccz1     | Q8C1Y8 | Vacuolar fusion protein CCZ1 homolog OS=Mus musculus OX=10090 GN=Ccz1 PE=1 SV=1                                             | 1.186666667 |
| Srsf9    | Q9D0B0 | Serine/arginine-rich splicing factor 9 OS=Mus musculus OX=10090 GN=Srsf9 PE=1 SV=1                                          | 0.87        |
| Vamp8    | O70404 | Vesicle-associated membrane protein 8 OS=Mus musculus OX=10090 GN=Vamp8 PE=1 SV=1                                           | 0.963333333 |
| Pon3     | Q62087 | Serum paraoxonase/lactonase 3 OS=Mus musculus OX=10090 GN=Pon3 PE=1 SV=2                                                    | 0.833333333 |
| Fnbp1    | Q80TY0 | Formin-binding protein 1 OS=Mus musculus OX=10090 GN=Fnbp1 PE=1 SV=2                                                        | 4.103333333 |
| Rufy1    | Q8BIJ7 | RUN and FYVE domain-containing protein 1 OS=Mus musculus OX=10090 GN=Rufy1 PE=1 SV=1                                        | 0.823333333 |
| Traf2    | P39429 | TNF receptor-associated factor 2 OS=Mus musculus OX=10090 GN=Traf2 PE=1 SV=1                                                | 0.816666667 |



|        |        |                                                                                                |             |
|--------|--------|------------------------------------------------------------------------------------------------|-------------|
| Pmvk   | Q9D1G2 | Phosphomevalonate kinase OS=Mus musculus OX=10090 GN=Pmvk PE=1 SV=3                            | 0.87        |
| Vps26c | O35075 | Vacuolar protein sorting-associated protein 26C OS=Mus musculus OX=10090 GN=Vps26c PE=1 SV=    | 0.76        |
| Virma  | A2AIV2 | Protein virilizer homolog OS=Mus musculus OX=10090 GN=Virma PE=1 SV=1                          | 1.19        |
| Itih3  | Q61704 | Inter-alpha-trypsin inhibitor heavy chain H3 OS=Mus musculus OX=10090 GN=Itih3 PE=1 SV=3       | 0.796666667 |
| Trim16 | Q99PP9 | Tripartite motif-containing protein 16 OS=Mus musculus OX=10090 GN=Trim16 PE=1 SV=2            | 0.903333333 |
| Rpl29  | P47915 | 60S ribosomal protein L29 OS=Mus musculus OX=10090 GN=Rpl29 PE=1 SV=2                          | 0.8         |
| Agfg2  | Q80WC7 | Arf-GAP domain and FG repeat-containing protein 2 OS=Mus musculus OX=10090 GN=Agfg2 PE=1 SV=   | 0.84        |
| Mrpl21 | Q9D1N9 | 39S ribosomal protein L21 mitochondrial OS=Mus musculus OX=10090 GN=Mrpl21 PE=1 SV=1           | 0.85        |
| Mrpl11 | Q9CQF0 | 39S ribosomal protein L11 mitochondrial OS=Mus musculus OX=10090 GN=Mrpl11 PE=1 SV=1           | 0.89        |
| Golga1 | Q9CW79 | Golgin subfamily A member 1 OS=Mus musculus OX=10090 GN=Golga1 PE=1 SV=2                       | 1.23        |
| Lztf1  | Q9JHQ5 | Leucine zipper transcription factor-like protein 1 OS=Mus musculus OX=10090 GN=Lztf1 PE=1 SV=1 | 1.096666667 |
| Mrps24 | Q9CQV5 | 28S ribosomal protein S24 mitochondrial OS=Mus musculus OX=10090 GN=Mrps24 PE=1 SV=1           | 0.673333333 |
| Tmed5  | Q9CXE7 | Transmembrane emp24 domain-containing protein 5 OS=Mus musculus OX=10090 GN=Tmed5 PE=          | 0.81        |
| Sptlc1 | O35704 | Serine palmitoyltransferase 1 OS=Mus musculus OX=10090 GN=Sptlc1 PE=1 SV=2                     | 0.856666667 |
| Nenf   | Q9CQ45 | Neudesin OS=Mus musculus OX=10090 GN=Nenf PE=1 SV=1                                            | 0.93        |
| Spcs3  | Q6ZWQ7 | Signal peptidase complex subunit 3 OS=Mus musculus OX=10090 GN=Spcs3 PE=1 SV=1                 | 0.906666667 |
| Nbn    | Q9R207 | Nibrin OS=Mus musculus OX=10090 GN=Nbn PE=1 SV=1                                               | 0.78        |
| Mcm3ap | Q9WUU9 | Germinal-center associated nuclear protein OS=Mus musculus OX=10090 GN=Mcm3ap PE=1 SV=2        | 2.036666667 |
| Patl1  | Q3TC46 | Protein PAT1 homolog 1 OS=Mus musculus OX=10090 GN=Patl1 PE=1 SV=2                             | 1.066666667 |
| Tamm41 | Q3TUH1 | Phosphatidate cytidylyltransferase mitochondrial OS=Mus musculus OX=10090 GN=Tamm41 PE=1       | 0.78        |
| Cd3eap | Q76KJ5 | DNA-directed RNA polymerase I subunit RPA34 OS=Mus musculus OX=10090 GN=Polr1g PE=1 SV=2       | 1.083333333 |
| Xrcc1  | Q60596 | DNA repair protein XRCC1 OS=Mus musculus OX=10090 GN=Xrcc1 PE=1 SV=2                           | 1.156666667 |
| Apob   | E9Q414 | Apolipoprotein B-100 OS=Mus musculus OX=10090 GN=Apob PE=1 SV=1                                | 0.183333333 |
| Tfam   | P40630 | Transcription factor A mitochondrial OS=Mus musculus OX=10090 GN=Tfam PE=1 SV=2                | 0.94        |
| Pik3r1 | P26450 | Phosphatidylinositol 3-kinase regulatory subunit alpha OS=Mus musculus OX=10090 GN=Pik3r1 PE   | 1.303333333 |
| Tatdn1 | Q6P8M1 | Putative deoxyribonuclease TATDN1 OS=Mus musculus OX=10090 GN=Tatdn1 PE=1 SV=1                 | 1.09        |
| Steap2 | Q8BWB6 | Metalloreductase STEAP2 OS=Mus musculus OX=10090 GN=Steap2 PE=1 SV=1                           | 0.993333333 |
| Tmx1   | Q8VBT0 | Thioredoxin-related transmembrane protein 1 OS=Mus musculus OX=10090 GN=Tmx1 PE=1 SV=1         | 0.676666667 |
| F5     | O88783 | Coagulation factor V OS=Mus musculus OX=10090 GN=F5 PE=1 SV=1                                  | 0.223333333 |
| Sumf2  | Q8BPG6 | Inactive C-alpha-formylglycine-generating enzyme 2 OS=Mus musculus OX=10090 GN=Sumf2 PE=1 SV=  | 0.963333333 |
| Mrpl24 | Q9CQ06 | 39S ribosomal protein L24 mitochondrial OS=Mus musculus OX=10090 GN=Mrpl24 PE=1 SV=1           | 0.746666667 |
| Alkbh3 | Q8K1E6 | Alpha-ketoglutarate-dependent dioxygenase alkb homolog 3 OS=Mus musculus OX=10090 GN=Alkb      | 0.96        |
| Sec11a | Q9R0P6 | Signal peptidase complex catalytic subunit SEC11A OS=Mus musculus OX=10090 GN=Sec11a PE=1 SV=  | 0.903333333 |
| Rpp40  | Q8R1F9 | Ribonuclease P protein subunit p40 OS=Mus musculus OX=10090 GN=Rpp40 PE=2 SV=2                 | 0.963333333 |

|         |        |                                                                                                                                 |             |
|---------|--------|---------------------------------------------------------------------------------------------------------------------------------|-------------|
| Mrpl49  | Q9CQ40 | 39S ribosomal protein L49 mitochondrial OS=Mus musculus OX=10090 GN=Mrpl49 PE=1 SV=1                                            | 1.166666667 |
| Mrpl15  | Q9CPR5 | 39S ribosomal protein L15 mitochondrial OS=Mus musculus OX=10090 GN=Mrpl15 PE=1 SV=1                                            | 0.86        |
| Ago1    | Q8CJG1 | Protein argonaute-1 OS=Mus musculus OX=10090 GN=Ago1 PE=1 SV=2                                                                  |             |
| Strbp   | Q91WM1 | Spermatid perinuclear RNA-binding protein OS=Mus musculus OX=10090 GN=Strbp PE=1 SV=1                                           |             |
| Smad3   | Q8BUN5 | Mothers against decapentaplegic homolog 3 OS=Mus musculus OX=10090 GN=Smad3 PE=1 SV=2                                           |             |
| Itpr1   | P11881 | Inositol 1 4 5-trisphosphate receptor type 1 OS=Mus musculus OX=10090 GN=Itpr1 PE=1 SV=2                                        |             |
| Itpr2   | Q9Z329 | Inositol 1 4 5-trisphosphate receptor type 2 OS=Mus musculus OX=10090 GN=Itpr2 PE=1 SV=4                                        |             |
| Ube2v1  | Q9CZY3 | Ubiquitin-conjugating enzyme E2 variant 1 OS=Mus musculus OX=10090 GN=Ube2v1 PE=1 SV=1                                          | 3.273333333 |
| Ephb4   | P54761 | Ephrin type-B receptor 4 OS=Mus musculus OX=10090 GN=Ephb4 PE=1 SV=2                                                            |             |
| Ppp3cb  | P48453 | Serine/threonine-protein phosphatase 2B catalytic subunit beta isoform OS=Mus musculus OX=10090 GN=Ppp3cb PE=1 SV=1             | 0.883333333 |
| Csnk1d  | Q9DC28 | Casein kinase I isoform delta OS=Mus musculus OX=10090 GN=Csnk1d PE=1 SV=2                                                      | 1.05        |
| Tbl1xr1 | Q8BHJ5 | F-box-like/WD repeat-containing protein TBL1XR1 OS=Mus musculus OX=10090 GN=Tbl1xr1 PE=1 SV=1                                   | 1.466666667 |
| Cstf2t  | Q8C7E9 | Cleavage stimulation factor subunit 2 tau variant OS=Mus musculus OX=10090 GN=Cstf2t PE=1 SV=1                                  | 1.126666667 |
| Rab6b   | P61294 | Ras-related protein Rab-6B OS=Mus musculus OX=10090 GN=Rab6b PE=1 SV=1                                                          | 1.31        |
| Rap2c   | Q8BU31 | Ras-related protein Rap-2c OS=Mus musculus OX=10090 GN=Rap2c PE=1 SV=1                                                          | 1.666666667 |
| Tia1    | P52912 | Nucleolysin TIA-1 OS=Mus musculus OX=10090 GN=Tia1 PE=1 SV=1                                                                    | 0.86        |
| Ugt1a6  | Q64435 | UDP-glucuronosyltransferase 1-6 OS=Mus musculus OX=10090 GN=Ugt1a6 PE=1 SV=1                                                    | 0.94        |
| Srsf4   | Q8VE97 | Serine/arginine-rich splicing factor 4 OS=Mus musculus OX=10090 GN=Srsf4 PE=2 SV=1                                              | 0.943333333 |
| Epha4   | Q03137 | Ephrin type-A receptor 4 OS=Mus musculus OX=10090 GN=Epha4 PE=1 SV=2                                                            | 1.223333333 |
| Txnrd3  | Q99MD6 | Thioredoxin reductase 3 OS=Mus musculus OX=10090 GN=Txnrd3 PE=1 SV=3                                                            | 1.48        |
| Stam    | P70297 | Signal transducing adapter molecule 1 OS=Mus musculus OX=10090 GN=Stam PE=1 SV=3                                                | 1.06        |
| Ranbp9  | P69566 | Ran-binding protein 9 OS=Mus musculus OX=10090 GN=Ranbp9 PE=1 SV=1                                                              | 1.09        |
| Bcr     | Q6PAJ1 | Breakpoint cluster region protein OS=Mus musculus OX=10090 GN=Bcr PE=1 SV=3                                                     | 1.273333333 |
| Ppp2r5e | Q61151 | Serine/threonine-protein phosphatase 2A 56 kDa regulatory subunit epsilon isoform OS=Mus musculus OX=10090 GN=Ppp2r5e PE=1 SV=1 | 0.85        |
| Uaca    | Q8CGB3 | Uveal autoantigen with coiled-coil domains and ankyrin repeats OS=Mus musculus OX=10090 GN=Uaca PE=1 SV=1                       | 1.926666667 |
| Rab31   | Q921E2 | Ras-related protein Rab-31 OS=Mus musculus OX=10090 GN=Rab31 PE=1 SV=1                                                          | 0.733333333 |
| Ptpn21  | Q62136 | Tyrosine-protein phosphatase non-receptor type 21 OS=Mus musculus OX=10090 GN=Ptpn21 PE=1 SV=1                                  | 0.996666667 |
| Arpc1a  | Q9R0Q6 | Actin-related protein 2/3 complex subunit 1A OS=Mus musculus OX=10090 GN=Arpc1a PE=1 SV=1                                       | 0.81        |
| Cdk9    | Q99J95 | Cyclin-dependent kinase 9 OS=Mus musculus OX=10090 GN=Cdk9 PE=1 SV=1                                                            | 0.766666667 |
| Gnpda1  | O88958 | Glucosamine-6-phosphate isomerase 1 OS=Mus musculus OX=10090 GN=Gnpda1 PE=1 SV=3                                                | 0.853333333 |
| Anapc2  | Q8BZQ7 | Anaphase-promoting complex subunit 2 OS=Mus musculus OX=10090 GN=Anapc2 PE=1 SV=2                                               | 0.843333333 |
| Srsf7   | Q8BL97 | Serine/arginine-rich splicing factor 7 OS=Mus musculus OX=10090 GN=Srsf7 PE=1 SV=1                                              | 0.903333333 |
| Atl2    | Q6PA06 | Atlantin-2 OS=Mus musculus OX=10090 GN=Atl2 PE=1 SV=1                                                                           | 1.046666667 |
| Egfr    | Q01279 | Epidermal growth factor receptor OS=Mus musculus OX=10090 GN=Egfr PE=1 SV=1                                                     | 0.85        |

|         |        |                                                                                                                      |             |
|---------|--------|----------------------------------------------------------------------------------------------------------------------|-------------|
| Prkab1  | Q9R078 | 5'-AMP-activated protein kinase subunit beta-1 OS=Mus musculus OX=10090 GN=Prkab1 PE=1 SV=2                          | 0.876666667 |
| Snrpb2  | Q9CQI7 | U2 small nuclear ribonucleoprotein B" OS=Mus musculus OX=10090 GN=Snrpb2 PE=1 SV=1                                   | 0.873333333 |
| Ddah2   | Q99LD8 | N(G) N(G)-dimethylarginine dimethylaminohydrolase 2 OS=Mus musculus OX=10090 GN=Ddah2 PE=1 SV=1                      | 0.83        |
| Fkbp15  | Q6P9Q6 | FK506-binding protein 15 OS=Mus musculus OX=10090 GN=Fkbp15 PE=1 SV=2                                                | 0.91        |
| Ccdc124 | Q9D8X2 | Coiled-coil domain-containing protein 124 OS=Mus musculus OX=10090 GN=Ccdc124 PE=1 SV=1                              | 0.973333333 |
| Tars2   | Q3UQ84 | Threonine-tRNA ligase mitochondrial OS=Mus musculus OX=10090 GN=Tars2 PE=1 SV=1                                      | 0.866666667 |
| Nexn    | Q7TPW1 | Nexilin OS=Mus musculus OX=10090 GN=Nexn PE=1 SV=3                                                                   | 0.8         |
| Prkcd   | P28867 | Protein kinase C delta type OS=Mus musculus OX=10090 GN=Prkcd PE=1 SV=3                                              | 0.69        |
| Mast4   | Q811L6 | Microtubule-associated serine/threonine-protein kinase 4 OS=Mus musculus OX=10090 GN=Mast4 PE=1 SV=1                 | 0.99        |
| Kif3a   | P28741 | Kinesin-like protein KIF3A OS=Mus musculus OX=10090 GN=Kif3a PE=1 SV=2                                               | 1.086666667 |
| Clta    | O08585 | Clathrin light chain A OS=Mus musculus OX=10090 GN=Clta PE=1 SV=2                                                    | 0.943333333 |
| Uri1    | Q3TLD5 | Unconventional prefoldin RPB5 interactor OS=Mus musculus OX=10090 GN=Uri1 PE=1 SV=2                                  | 0.966666667 |
| Rbm17   | Q8JZX4 | Splicing factor 45 OS=Mus musculus OX=10090 GN=Rbm17 PE=1 SV=1                                                       | 0.796666667 |
| C3      | P01027 | Complement C3 OS=Mus musculus OX=10090 GN=C3 PE=1 SV=3                                                               | 0.14        |
| Rplp1   | P47955 | 60S acidic ribosomal protein P1 OS=Mus musculus OX=10090 GN=Rplp1 PE=1 SV=1                                          | 0.853333333 |
| Lypla1  | P97823 | Acyl-protein thioesterase 1 OS=Mus musculus OX=10090 GN=Lypla1 PE=1 SV=1                                             | 0.83        |
| Nup35   | Q8R4R6 | Nucleoporin NUP35 OS=Mus musculus OX=10090 GN=Nup35 PE=1 SV=2                                                        | 0.893333333 |
| Cyb5b   | Q9CQX2 | Cytochrome b5 type B OS=Mus musculus OX=10090 GN=Cyb5b PE=1 SV=1                                                     | 0.91        |
| Pthr2   | Q8R2Y8 | Peptidyl-tRNA hydrolase 2 mitochondrial OS=Mus musculus OX=10090 GN=Pthr2 PE=1 SV=1                                  | 0.876666667 |
| Naca    | P70670 | Nascent polypeptide-associated complex subunit alpha muscle-specific form OS=Mus musculus OX=10090 GN=Naca PE=1 SV=1 | 0.846666667 |
| Naca    | Q60817 | Nascent polypeptide-associated complex subunit alpha OS=Mus musculus OX=10090 GN=Naca PE=1 SV=1                      | 0.846666667 |
| Tpp1    | O89023 | Tripeptidyl-peptidase 1 OS=Mus musculus OX=10090 GN=Tpp1 PE=1 SV=2                                                   | 0.853333333 |
| Eloc    | P83940 | Elongin-C OS=Mus musculus OX=10090 GN=Eloc PE=1 SV=1                                                                 | 0.826666667 |
| Wdr77   | Q99J09 | Methylosome protein 50 OS=Mus musculus OX=10090 GN=Wdr77 PE=1 SV=1                                                   | 0.943333333 |
| Fndc3b  | Q6NWW9 | Fibronectin type III domain-containing protein 3B OS=Mus musculus OX=10090 GN=Fndc3b PE=1 SV=1                       | 0.776666667 |
| Atox1   | O08997 | Copper transport protein ATOX1 OS=Mus musculus OX=10090 GN=Atox1 PE=1 SV=1                                           | 0.906666667 |
| Efemp2  | Q9WVJ9 | EGF-containing fibulin-like extracellular matrix protein 2 OS=Mus musculus OX=10090 GN=Efemp2 PE=1 SV=1              | 0.856666667 |
| Cd44    | P15379 | CD44 antigen OS=Mus musculus OX=10090 GN=Cd44 PE=1 SV=3                                                              | 0.89        |
| Mbd3    | Q9Z2D8 | Methyl-CpG-binding domain protein 3 OS=Mus musculus OX=10090 GN=Mbd3 PE=1 SV=1                                       | 0.853333333 |
| Grsf1   | Q8C5Q4 | G-rich sequence factor 1 OS=Mus musculus OX=10090 GN=Grsf1 PE=1 SV=2                                                 | 0.893333333 |
| Cdh2    | P15116 | Cadherin-2 OS=Mus musculus OX=10090 GN=Cdh2 PE=1 SV=2                                                                | 0.72        |
| Pin1    | Q9QUR7 | Peptidyl-prolyl cis-trans isomerase NIMA-interacting 1 OS=Mus musculus OX=10090 GN=Pin1 PE=1 SV=1                    | 0.88        |
| Blvrb   | Q923D2 | Flavin reductase (NADPH) OS=Mus musculus OX=10090 GN=Blvrb PE=1 SV=3                                                 | 0.833333333 |
| Jpt2    | Q6PGH2 | Jupiter microtubule associated homolog 2 OS=Mus musculus OX=10090 GN=Jpt2 PE=1 SV=1                                  | 0.823333333 |

|          |        |                                                                                                           |             |
|----------|--------|-----------------------------------------------------------------------------------------------------------|-------------|
| Ndrp1    | Q62433 | Protein NDRG1 OS=Mus musculus OX=10090 GN=Ndrp1 PE=1 SV=1                                                 | 0.8         |
| Rps7     | P62082 | 40S ribosomal protein S7 OS=Mus musculus OX=10090 GN=Rps7 PE=2 SV=1                                       | 0.91        |
| Nptn     | P97300 | Neuroplastin OS=Mus musculus OX=10090 GN=Nptn PE=1 SV=3                                                   | 0.806666667 |
| Bub1b    | Q9Z1S0 | Mitotic checkpoint serine/threonine-protein kinase BUB1 beta OS=Mus musculus OX=10090 GN=Bub1b PE=1 SV=1  | 0.66        |
| Sh3bgrl  | Q9JJU8 | SH3 domain-binding glutamic acid-rich-like protein OS=Mus musculus OX=10090 GN=Sh3bgrl PE=1 SV=1          | 0.883333333 |
| Arpc5    | Q9CPW4 | Actin-related protein 2/3 complex subunit 5 OS=Mus musculus OX=10090 GN=Arpc5 PE=1 SV=3                   | 0.826666667 |
| Rbm3     | O89086 | RNA-binding protein 3 OS=Mus musculus OX=10090 GN=Rbm3 PE=1 SV=1                                          | 0.963333333 |
| Emc8     | O70378 | ER membrane protein complex subunit 8 OS=Mus musculus OX=10090 GN=Emc8 PE=1 SV=1                          | 1.01        |
| Rpa2     | Q62193 | Replication protein A 32 kDa subunit OS=Mus musculus OX=10090 GN=Rpa2 PE=1 SV=1                           | 0.816666667 |
| Mrpl37   | Q921S7 | 39S ribosomal protein L37 mitochondrial OS=Mus musculus OX=10090 GN=Mrpl37 PE=1 SV=1                      | 0.75        |
| Vps13a   | Q5H8C4 | Vacuolar protein sorting-associated protein 13A OS=Mus musculus OX=10090 GN=Vps13a PE=1 SV=1              | 1.62        |
| Cyts     | P62897 | Cytochrome c somatic OS=Mus musculus OX=10090 GN=Cyts PE=1 SV=2                                           | 0.75        |
| Gipc1    | Q9Z0G0 | PDZ domain-containing protein GIPC1 OS=Mus musculus OX=10090 GN=Gipc1 PE=1 SV=1                           | 0.986666667 |
| Zfp1     | Q9DB43 | Zinc finger protein-like 1 OS=Mus musculus OX=10090 GN=Zfp1 PE=1 SV=1                                     | 0.973333333 |
| Btf3l4   | Q9CQH7 | Transcription factor BTF3 homolog 4 OS=Mus musculus OX=10090 GN=Btf3l4 PE=1 SV=1                          | 0.81        |
| Pea15    | Q62048 | Astrocytic phosphoprotein PEA-15 OS=Mus musculus OX=10090 GN=Pea15 PE=1 SV=1                              | 0.846666667 |
| Chchd3   | Q9CRB9 | MICOS complex subunit Mic19 OS=Mus musculus OX=10090 GN=Chchd3 PE=1 SV=1                                  | 0.983333333 |
| Thumpd3  | P97770 | THUMP domain-containing protein 3 OS=Mus musculus OX=10090 GN=Thumpd3 PE=1 SV=1                           | 0.8         |
| Denr     | Q9CQJ6 | Density-regulated protein OS=Mus musculus OX=10090 GN=Denr PE=1 SV=1                                      | 0.906666667 |
| Aspscr1  | Q8VBT9 | Tether containing UBX domain for GLUT4 OS=Mus musculus OX=10090 GN=Aspscr1 PE=1 SV=1                      | 0.973333333 |
| Espl1    | P60330 | Separin OS=Mus musculus OX=10090 GN=Espl1 PE=1 SV=1                                                       | 1.416666667 |
| Mcu      | Q3UMR5 | Calcium uniporter protein mitochondrial OS=Mus musculus OX=10090 GN=Mcu PE=1 SV=2                         | 0.85        |
| Pafah1b2 | Q61206 | Platelet-activating factor acetylhydrolase IB subunit beta OS=Mus musculus OX=10090 GN=Pafah1b2 PE=1 SV=1 | 0.82        |
| Med1     | Q925J9 | Mediator of RNA polymerase II transcription subunit 1 OS=Mus musculus OX=10090 GN=Med1 PE=1 SV=1          | 10.76       |
| Mapkapk2 | P49138 | MAP kinase-activated protein kinase 2 OS=Mus musculus OX=10090 GN=Mapkapk2 PE=1 SV=2                      | 0.896666667 |
| Imp3     | Q921Y2 | U3 small nucleolar ribonucleoprotein protein IMP3 OS=Mus musculus OX=10090 GN=Imp3 PE=2 SV=1              | 0.82        |
| Zranb2   | Q9R020 | Zinc finger Ran-binding domain-containing protein 2 OS=Mus musculus OX=10090 GN=Zranb2 PE=1 SV=1          | 0.833333333 |
| Pex19    | Q8VCI5 | Peroxisomal biogenesis factor 19 OS=Mus musculus OX=10090 GN=Pex19 PE=1 SV=1                              | 0.833333333 |
| Mfap1b   | C0HKD9 | Microfibrillar-associated protein 1B OS=Mus musculus OX=10090 GN=Mfap1b PE=1 SV=1                         | 0.89        |
| Mfap1a   | C0HKD8 | Microfibrillar-associated protein 1A OS=Mus musculus OX=10090 GN=Mfap1a PE=1 SV=1                         | 0.89        |
| Abcb10   | Q9JI39 | ATP-binding cassette sub-family B member 10 mitochondrial OS=Mus musculus OX=10090 GN=Abcb10 PE=1 SV=1    | 0.91        |
| Tomm22   | Q9CPQ3 | Mitochondrial import receptor subunit TOM22 homolog OS=Mus musculus OX=10090 GN=Tomm22 PE=1 SV=1          | 0.826666667 |
| Ddx52    | Q8K301 | Probable ATP-dependent RNA helicase DDX52 OS=Mus musculus OX=10090 GN=Ddx52 PE=2 SV=2                     | 0.816666667 |
| Sarnp    | Q9D1J3 | SAP domain-containing ribonucleoprotein OS=Mus musculus OX=10090 GN=Sarnp PE=1 SV=3                       | 0.926666667 |

|         |        |                                                                                                                    |             |
|---------|--------|--------------------------------------------------------------------------------------------------------------------|-------------|
| Cbwd1   | Q8VEH6 | COBW domain-containing protein 1 OS=Mus musculus OX=10090 GN=Cbwd1 PE=1 SV=1                                       | 0.9         |
| Naalad2 | Q9CZR2 | N-acetylated-alpha-linked acidic dipeptidase 2 OS=Mus musculus OX=10090 GN=Naalad2 PE=1 SV=2                       | 0.906666667 |
| Rfc4    | Q99J62 | Replication factor C subunit 4 OS=Mus musculus OX=10090 GN=Rfc4 PE=1 SV=1                                          | 0.836666667 |
| Syk     | P48025 | Tyrosine-protein kinase SYK OS=Mus musculus OX=10090 GN=Syk PE=1 SV=2                                              | 1.126666667 |
| Ciao1   | Q99KN2 | Probable cytosolic iron-sulfur protein assembly protein CIAO1 OS=Mus musculus OX=10090 GN=Ciao1 PE=1 SV=2          | 0.773333333 |
| Rbbp6   | P97868 | E3 ubiquitin-protein ligase RBBP6 OS=Mus musculus OX=10090 GN=Rbbp6 PE=1 SV=5                                      | 1.103333333 |
| Snrpb   | P27048 | Small nuclear ribonucleoprotein-associated protein B OS=Mus musculus OX=10090 GN=Snrpb PE=1 SV=1                   | 0.923333333 |
| Snrpn   | P63163 | Small nuclear ribonucleoprotein-associated protein N OS=Mus musculus OX=10090 GN=Snrpn PE=1 SV=1                   | 0.923333333 |
| Arhgap5 | P97393 | Rho GTPase-activating protein 5 OS=Mus musculus OX=10090 GN=Arhgap5 PE=1 SV=2                                      | 1.206666667 |
| Emc3    | Q99KI3 | ER membrane protein complex subunit 3 OS=Mus musculus OX=10090 GN=Emc3 PE=1 SV=3                                   | 0.84        |
| Zwilch  | Q8R060 | Protein zwilch homolog OS=Mus musculus OX=10090 GN=Zwilch PE=1 SV=1                                                | 0.846666667 |
| Mob4    | Q6PEB6 | MOB-like protein phocein OS=Mus musculus OX=10090 GN=Mob4 PE=1 SV=1                                                | 0.913333333 |
| Rbm15   | Q0VBL3 | RNA-binding protein 15 OS=Mus musculus OX=10090 GN=Rbm15 PE=1 SV=1                                                 | 0.96        |
| Rab9a   | Q9R0M6 | Ras-related protein Rab-9A OS=Mus musculus OX=10090 GN=Rab9a PE=1 SV=1                                             | 0.883333333 |
| Ngdn    | Q9DB96 | Neuroguidin OS=Mus musculus OX=10090 GN=Ngdn PE=1 SV=1                                                             | 0.87        |
| Fstl1   | Q62356 | Follistatin-related protein 1 OS=Mus musculus OX=10090 GN=Fstl1 PE=1 SV=2                                          | 1           |
| Ist1    | Q9CX00 | IST1 homolog OS=Mus musculus OX=10090 GN=Ist1 PE=1 SV=1                                                            | 0.923333333 |
| Tmem209 | Q8BRG8 | Transmembrane protein 209 OS=Mus musculus OX=10090 GN=Tmem209 PE=2 SV=1                                            | 0.786666667 |
| Vbp1    | P61759 | Prefoldin subunit 3 OS=Mus musculus OX=10090 GN=Vbp1 PE=1 SV=2                                                     | 0.913333333 |
| Pik3c3  | Q6PF93 | Phosphatidylinositol 3-kinase catalytic subunit type 3 OS=Mus musculus OX=10090 GN=Pik3c3 PE=1 SV=1                | 0.853333333 |
| Rabggta | Q9JHK4 | Geranylgeranyl transferase type-2 subunit alpha OS=Mus musculus OX=10090 GN=Rabggta PE=1 SV=1                      | 0.836666667 |
| Ubl4a   | P21126 | Ubiquitin-like protein 4A OS=Mus musculus OX=10090 GN=Ubl4a PE=1 SV=1                                              | 0.886666667 |
| Irs2    | P81122 | Insulin receptor substrate 2 OS=Mus musculus OX=10090 GN=Irs2 PE=1 SV=2                                            | 1.04        |
| Lsm14b  | Q8CGC4 | Protein LSM14 homolog B OS=Mus musculus OX=10090 GN=Lsm14b PE=1 SV=3                                               | 0.88        |
| Mgat1   | P27808 | Alpha-1,3-mannosyl-glycoprotein 2-beta-N-acetylglucosaminyltransferase OS=Mus musculus OX=10090 GN=Mgat1 PE=1 SV=1 | 0.98        |
| Gnpat1  | Q9JK38 | Glucosamine 6-phosphate N-acetyltransferase OS=Mus musculus OX=10090 GN=Gnpat1 PE=1 SV=1                           | 0.823333333 |
| Msi2    | Q920Q6 | RNA-binding protein Musashi homolog 2 OS=Mus musculus OX=10090 GN=Msi2 PE=1 SV=1                                   | 0.83        |
| Tinagl1 | Q99JR5 | Tubulointerstitial nephritis antigen-like OS=Mus musculus OX=10090 GN=Tinagl1 PE=1 SV=1                            | 0.793333333 |
| Ptges2  | Q8BWM0 | Prostaglandin E synthase 2 OS=Mus musculus OX=10090 GN=Ptges2 PE=1 SV=3                                            | 0.89        |
| Mettl16 | Q9CQG2 | RNA N6-adenosine-methyltransferase METTL16 OS=Mus musculus OX=10090 GN=Mettl16 PE=1 SV=1                           | 0.683333333 |
| Ogfod1  | Q3U0K8 | Prolyl 3-hydroxylase OGFOD1 OS=Mus musculus OX=10090 GN=Ogfod1 PE=1 SV=1                                           | 0.86        |
| Mnat1   | P51949 | CDK-activating kinase assembly factor MAT1 OS=Mus musculus OX=10090 GN=Mnat1 PE=1 SV=2                             | 0.843333333 |
| Psmb6   | Q60692 | Proteasome subunit beta type-6 OS=Mus musculus OX=10090 GN=Psmb6 PE=1 SV=3                                         | 0.856666667 |
| Psm8    | Q9CX56 | 26S proteasome non-ATPase regulatory subunit 8 OS=Mus musculus OX=10090 GN=Psm8 PE=1 SV=1                          | 0.863333333 |



|          |        |                                                                                                          |             |
|----------|--------|----------------------------------------------------------------------------------------------------------|-------------|
| Dvl2     | Q60838 | Segment polarity protein dishevelled homolog DVL-2 OS=Mus musculus OX=10090 GN=Dvl2 PE=1 SV=1            | 0.743333333 |
| Arsb     | P50429 | Arylsulfatase B OS=Mus musculus OX=10090 GN=Arsb PE=1 SV=3                                               | 1.046666667 |
| Rptor    | Q8K4Q0 | Regulatory-associated protein of mTOR OS=Mus musculus OX=10090 GN=Rptor PE=1 SV=1                        | 1.73        |
| Sun1     | Q9D666 | SUN domain-containing protein 1 OS=Mus musculus OX=10090 GN=Sun1 PE=1 SV=2                               | 0.79        |
| Prepl    | Q8C167 | Prolyl endopeptidase-like OS=Mus musculus OX=10090 GN=Prepl PE=1 SV=1                                    | 0.916666667 |
| Akr7a2   | Q8CG76 | Aflatoxin B1 aldehyde reductase member 2 OS=Mus musculus OX=10090 GN=Akr7a2 PE=1 SV=3                    | 0.973333333 |
| Exosc4   | Q921I9 | Exosome complex component RRP41 OS=Mus musculus OX=10090 GN=Exosc4 PE=1 SV=3                             | 0.903333333 |
| Recql    | Q9Z129 | ATP-dependent DNA helicase Q1 OS=Mus musculus OX=10090 GN=Recql PE=1 SV=2                                | 1.043333333 |
| Mau2     | Q9D2X5 | MAU2 chromatid cohesion factor homolog OS=Mus musculus OX=10090 GN=Mau2 PE=1 SV=3                        | 1.03        |
| Ykt6     | Q9CQW1 | Synaptobrevin homolog YKT6 OS=Mus musculus OX=10090 GN=Ykt6 PE=1 SV=1                                    | 0.876666667 |
| Nelfa    | Q8BG30 | Negative elongation factor A OS=Mus musculus OX=10090 GN=Nelfa PE=1 SV=1                                 | 0.776666667 |
| Dera     | Q91YP3 | Deoxyribose-phosphate aldolase OS=Mus musculus OX=10090 GN=Dera PE=1 SV=1                                | 0.746666667 |
| Spag7    | Q7TNE3 | Sperm-associated antigen 7 OS=Mus musculus OX=10090 GN=Spag7 PE=1 SV=1                                   | 0.906666667 |
| Emc7     | Q9EP72 | ER membrane protein complex subunit 7 OS=Mus musculus OX=10090 GN=Emc7 PE=1 SV=1                         | 0.873333333 |
| S100a11  | P50543 | Protein S100-A11 OS=Mus musculus OX=10090 GN=S100a11 PE=1 SV=1                                           | 0.903333333 |
| Riok3    | Q9DBU3 | Serine/threonine-protein kinase RIO3 OS=Mus musculus OX=10090 GN=Riok3 PE=1 SV=3                         | 0.99        |
| Mecr     | Q9DCS3 | Enoyl-[acyl-carrier-protein] reductase mitochondrial OS=Mus musculus OX=10090 GN=Mecr PE=1 SV=1          | 1.02        |
| Rps23    | P62267 | 40S ribosomal protein S23 OS=Mus musculus OX=10090 GN=Rps23 PE=1 SV=3                                    | 0.88        |
| Crot     | Q9DC50 | Peroxisomal carnitine O-octanoyltransferase OS=Mus musculus OX=10090 GN=Crot PE=1 SV=1                   | 0.906666667 |
| Wiz      | O88286 | Protein Wiz OS=Mus musculus OX=10090 GN=Wiz PE=1 SV=2                                                    | 0.75        |
| Trmt5    | Q9D0C4 | tRNA (guanine(37)-N1)-methyltransferase OS=Mus musculus OX=10090 GN=Trmt5 PE=1 SV=1                      | 1.006666667 |
| Tsnax    | Q9QZE7 | Translin-associated protein X OS=Mus musculus OX=10090 GN=Tsnax PE=1 SV=1                                | 0.876666667 |
| Tor1b    | Q9ER41 | Torsin-1B OS=Mus musculus OX=10090 GN=Tor1b PE=1 SV=2                                                    | 1.183333333 |
| Arhgef18 | Q6P9R4 | Rho guanine nucleotide exchange factor 18 OS=Mus musculus OX=10090 GN=Arhgef18 PE=1 SV=3                 | 0.806666667 |
| Nubp1    | Q9R060 | Cytosolic Fe-S cluster assembly factor NUBP1 OS=Mus musculus OX=10090 GN=Nubp1 PE=1 SV=1                 | 0.893333333 |
| Hgh1     | Q8C3I8 | Protein HGH1 homolog OS=Mus musculus OX=10090 GN=Hgh1 PE=1 SV=1                                          | 0.883333333 |
| Gopc     | Q8BH60 | Golgi-associated PDZ and coiled-coil motif-containing protein OS=Mus musculus OX=10090 GN=Gopc PE=1 SV=1 | 0.913333333 |
|          | Q9D1K7 | UPF0687 protein C20orf27 homolog OS=Mus musculus OX=10090 GN=Q9D1K7 PE=1 SV=3                            | 0.74        |
| Tbl2     | Q9R099 | Transducin beta-like protein 2 OS=Mus musculus OX=10090 GN=Tbl2 PE=1 SV=2                                | 1.01        |
| Clpp     | O88696 | ATP-dependent Clp protease proteolytic subunit mitochondrial OS=Mus musculus OX=10090 GN=Clpp PE=1 SV=1  | 0.943333333 |
| Inpp1    | P49442 | Inositol polyphosphate 1-phosphatase OS=Mus musculus OX=10090 GN=Inpp1 PE=1 SV=2                         | 0.876666667 |
| Hmbs     | P22907 | Porphobilinogen deaminase OS=Mus musculus OX=10090 GN=Hmbs PE=1 SV=2                                     | 0.803333333 |
| Ssr1     | Q9CY50 | Translocon-associated protein subunit alpha OS=Mus musculus OX=10090 GN=Ssr1 PE=1 SV=1                   | 0.88        |
| 5-Mar    | Q3KNM2 | E3 ubiquitin-protein ligase MARCHF5 OS=Mus musculus OX=10090 GN=Marchf5 PE=1 SV=1                        | 0.84        |

|          |        |                                                                                                                  |             |
|----------|--------|------------------------------------------------------------------------------------------------------------------|-------------|
| Exoc6b   | A6H5Z3 | Exocyst complex component 6B OS=Mus musculus OX=10090 GN=Exoc6b PE=1 SV=1                                        | 0.783333333 |
| Luzp1    | Q8R4U7 | Leucine zipper protein 1 OS=Mus musculus OX=10090 GN=Luzp1 PE=1 SV=2                                             | 0.916666667 |
| Srrm1    | Q52KI8 | Serine/arginine repetitive matrix protein 1 OS=Mus musculus OX=10090 GN=Srrm1 PE=1 SV=2                          | 0.776666667 |
| Ermp1    | Q3UVK0 | Endoplasmic reticulum metalloproteinase 1 OS=Mus musculus OX=10090 GN=Ermp1 PE=1 SV=2                            | 0.906666667 |
| Wac      | Q924H7 | WW domain-containing adapter protein with coiled-coil OS=Mus musculus OX=10090 GN=Wac PE=1 SV=1                  | 0.713333333 |
| Gpx4     | O70325 | Phospholipid hydroperoxide glutathione peroxidase OS=Mus musculus OX=10090 GN=Gpx4 PE=1 SV=1                     | 0.763333333 |
| Pigt     | Q8BXQ2 | GPI transamidase component PIG-T OS=Mus musculus OX=10090 GN=Pigt PE=1 SV=2                                      | 1.04        |
| Wasf2    | Q8BH43 | Wiskott-Aldrich syndrome protein family member 2 OS=Mus musculus OX=10090 GN=Wasf2 PE=1 SV=1                     | 0.963333333 |
| Qtrt1    | Q9JMA2 | Queuine tRNA-ribosyltransferase catalytic subunit 1 OS=Mus musculus OX=10090 GN=Qtrt1 PE=1 SV=1                  | 1.286666667 |
| Slc29a1  | Q9JIM1 | Equilibrative nucleoside transporter 1 OS=Mus musculus OX=10090 GN=Slc29a1 PE=1 SV=3                             | 0.823333333 |
|          | Q91V76 | Ester hydrolase C11orf54 homolog OS=Mus musculus OX=10090 GN=Q91V76 PE=1 SV=1                                    | 0.81        |
| Cnpy4    | Q8BQ47 | Protein canopy homolog 4 OS=Mus musculus OX=10090 GN=Cnpy4 PE=1 SV=1                                             | 0.91        |
| Tmem106b | Q80X71 | Transmembrane protein 106B OS=Mus musculus OX=10090 GN=Tmem106b PE=1 SV=1                                        | 1.006666667 |
| Ppan     | Q91YU8 | Suppressor of SWI4 1 homolog OS=Mus musculus OX=10090 GN=Ppan PE=1 SV=2                                          | 0.85        |
| Mrps35   | Q8BJZ4 | 28S ribosomal protein S35 mitochondrial OS=Mus musculus OX=10090 GN=Mrps35 PE=1 SV=2                             | 1.056666667 |
| Pard3    | Q99NH2 | Partitioning defective 3 homolog OS=Mus musculus OX=10090 GN=Pard3 PE=1 SV=2                                     | 1.25        |
| Necap1   | Q9CR95 | Adaptin ear-binding coat-associated protein 1 OS=Mus musculus OX=10090 GN=Necap1 PE=1 SV=2                       | 1.09        |
| Nacc1    | Q7TSZ8 | Nucleus accumbens-associated protein 1 OS=Mus musculus OX=10090 GN=Nacc1 PE=1 SV=1                               | 0.753333333 |
| Prpf38b  | Q80SY5 | Pre-mRNA-splicing factor 38B OS=Mus musculus OX=10090 GN=Prpf38b PE=1 SV=1                                       | 0.883333333 |
| Thoc3    | Q8VE80 | THO complex subunit 3 OS=Mus musculus OX=10090 GN=Thoc3 PE=2 SV=1                                                | 1.123333333 |
| Rabepk   | Q8VCH5 | Rab9 effector protein with kelch motifs OS=Mus musculus OX=10090 GN=Rabepk PE=1 SV=2                             | 1.05        |
| Incenp   | Q9WU62 | Inner centromere protein OS=Mus musculus OX=10090 GN=Incenp PE=1 SV=2                                            | 0.933333333 |
| Ddi2     | A2ADY9 | Protein DDI1 homolog 2 OS=Mus musculus OX=10090 GN=Ddi2 PE=1 SV=1                                                | 0.73        |
| Adam10   | O35598 | Disintegrin and metalloproteinase domain-containing protein 10 OS=Mus musculus OX=10090 GN=Adam10 PE=1 SV=1      | 0.91        |
| Sugp1    | Q8CH02 | SURP and G-patch domain-containing protein 1 OS=Mus musculus OX=10090 GN=Sugp1 PE=1 SV=1                         | 1.006666667 |
| Thoc7    | Q7TMY4 | THO complex subunit 7 homolog OS=Mus musculus OX=10090 GN=Thoc7 PE=1 SV=2                                        | 0.943333333 |
| Gk       | Q64516 | Glycerol kinase OS=Mus musculus OX=10090 GN=Gk PE=1 SV=2                                                         | 0.793333333 |
| Znf512   | Q69Z99 | Zinc finger protein 512 OS=Mus musculus OX=10090 GN=Znf512 PE=2 SV=2                                             | 1.033333333 |
| DSCC1    | Q14AI0 | Sister chromatid cohesion protein DCC1 OS=Mus musculus OX=10090 GN=DSCC1 PE=2 SV=1                               | 0.85        |
| Nme4     | Q9WV84 | Nucleoside diphosphate kinase mitochondrial OS=Mus musculus OX=10090 GN=Nme4 PE=1 SV=1                           | 0.883333333 |
| Arl2     | Q9D0J4 | ADP-ribosylation factor-like protein 2 OS=Mus musculus OX=10090 GN=Arl2 PE=1 SV=1                                | 0.896666667 |
| Pcyt1a   | P49586 | Choline-phosphate cytidyltransferase A OS=Mus musculus OX=10090 GN=Pcyt1a PE=1 SV=1                              | 0.956666667 |
| Ndufs2   | Q91WD5 | NADH dehydrogenase [ubiquinone] iron-sulfur protein 2 mitochondrial OS=Mus musculus OX=10090 GN=Ndufs2 PE=1 SV=1 | 0.693333333 |
| Pfdn6    | Q03958 | Prefoldin subunit 6 OS=Mus musculus OX=10090 GN=Pfdn6 PE=1 SV=1                                                  | 0.896666667 |

|          |        |                                                                                                       |             |
|----------|--------|-------------------------------------------------------------------------------------------------------|-------------|
| Tbcb     | Q9D1E6 | Tubulin-folding cofactor B OS=Mus musculus OX=10090 GN=Tbcb PE=1 SV=2                                 | 0.953333333 |
| Cryab    | P23927 | Alpha-crystallin B chain OS=Mus musculus OX=10090 GN=Cryab PE=1 SV=2                                  | 0.846666667 |
| Mrpl45   | Q9D0Q7 | 39S ribosomal protein L45 mitochondrial OS=Mus musculus OX=10090 GN=Mrpl45 PE=1 SV=1                  | 0.99        |
| Osbpl1a  | Q91XL9 | Oxysterol-binding protein-related protein 1 OS=Mus musculus OX=10090 GN=Osbpl1a PE=1 SV=2             | 0.836666667 |
| Commd9   | Q8K2Q0 | COMM domain-containing protein 9 OS=Mus musculus OX=10090 GN=Commd9 PE=1 SV=3                         | 1.133333333 |
| Wls      | Q6DID7 | Protein wntless homolog OS=Mus musculus OX=10090 GN=Wls PE=1 SV=1                                     | 0.79        |
| Pkn1     | P70268 | Serine/threonine-protein kinase N1 OS=Mus musculus OX=10090 GN=Pkn1 PE=1 SV=3                         | 1.286666667 |
| Cog5     | Q8C0L8 | Conserved oligomeric Golgi complex subunit 5 OS=Mus musculus OX=10090 GN=Cog5 PE=1 SV=3               | 1.09        |
| Arf6     | P62331 | ADP-ribosylation factor 6 OS=Mus musculus OX=10090 GN=Arf6 PE=1 SV=2                                  | 0.833333333 |
| Lactb2   | Q99KR3 | Endoribonuclease LACTB2 OS=Mus musculus OX=10090 GN=Lactb2 PE=1 SV=1                                  | 0.796666667 |
| Cog1     | Q9Z160 | Conserved oligomeric Golgi complex subunit 1 OS=Mus musculus OX=10090 GN=Cog1 PE=1 SV=3               | 1.206666667 |
| Rcl1     | Q9JJT0 | RNA 3'-terminal phosphate cyclase-like protein OS=Mus musculus OX=10090 GN=Rcl1 PE=2 SV=1             | 0.83        |
| Clpb     | Q60649 | Caseinolytic peptidase B protein homolog OS=Mus musculus OX=10090 GN=Clpb PE=1 SV=1                   | 0.733333333 |
| Ttc39b   | Q8BYY4 | Tetratricopeptide repeat protein 39B OS=Mus musculus OX=10090 GN=Ttc39b PE=1 SV=1                     | 0.776666667 |
| Cpsf4    | Q8BQZ5 | Cleavage and polyadenylation specificity factor subunit 4 OS=Mus musculus OX=10090 GN=Cpsf4 PE=1 SV=1 | 0.923333333 |
| Wtap     | Q9ER69 | Pre-mRNA-splicing regulator WTAP OS=Mus musculus OX=10090 GN=Wtap PE=1 SV=3                           | 0.996666667 |
| Erlec1   | Q8VEH8 | Endoplasmic reticulum lectin 1 OS=Mus musculus OX=10090 GN=Erlec1 PE=1 SV=1                           | 1.036666667 |
| Ciao2b   | Q9D187 | Cytosolic iron-sulfur assembly component 2B OS=Mus musculus OX=10090 GN=Ciao2b PE=1 SV=1              | 0.96        |
| Dctd     | Q8K2D6 | Deoxycytidylate deaminase OS=Mus musculus OX=10090 GN=Dctd PE=2 SV=1                                  | 0.96        |
| Isoc1    | Q91V64 | Isochorismatase domain-containing protein 1 OS=Mus musculus OX=10090 GN=Isoc1 PE=1 SV=1               | 0.836666667 |
| Rpa3     | Q9CQ71 | Replication protein A 14 kDa subunit OS=Mus musculus OX=10090 GN=Rpa3 PE=1 SV=1                       | 0.89        |
| Lrrc41   | Q8K1C9 | Leucine-rich repeat-containing protein 41 OS=Mus musculus OX=10090 GN=Lrrc41 PE=1 SV=3                | 1.84        |
| Hdac7    | Q8C2B3 | Histone deacetylase 7 OS=Mus musculus OX=10090 GN=Hdac7 PE=1 SV=2                                     | 1.116666667 |
| Mtx1     | P47802 | Metaxin-1 OS=Mus musculus OX=10090 GN=Mtx1 PE=1 SV=1                                                  | 0.906666667 |
| Nipsnap1 | O55125 | Protein NipSnap homolog 1 OS=Mus musculus OX=10090 GN=Nipsnap1 PE=1 SV=1                              | 0.796666667 |
| Eif4e2   | Q8BMB3 | Eukaryotic translation initiation factor 4E type 2 OS=Mus musculus OX=10090 GN=Eif4e2 PE=1 SV=1       | 0.766666667 |
| Gmppb    | Q8BTZ7 | Mannose-1-phosphate guanyltransferase beta OS=Mus musculus OX=10090 GN=Gmppb PE=1 SV=1                | 0.83        |
| Dph5     | Q9CWQ0 | Diphthine methyl ester synthase OS=Mus musculus OX=10090 GN=Dph5 PE=1 SV=2                            | 1.126666667 |
| Nt5c     | Q9JM14 | 5'(3')-deoxyribonucleotidase cytosolic type OS=Mus musculus OX=10090 GN=Nt5c PE=1 SV=1                | 0.883333333 |
| Rpl24    | Q8BP67 | 60S ribosomal protein L24 OS=Mus musculus OX=10090 GN=Rpl24 PE=1 SV=2                                 | 0.916666667 |
| Mrpl38   | Q8K2M0 | 39S ribosomal protein L38 mitochondrial OS=Mus musculus OX=10090 GN=Mrpl38 PE=1 SV=2                  | 0.846666667 |
| Ppig     | A2AR02 | Peptidyl-prolyl cis-trans isomerase G OS=Mus musculus OX=10090 GN=Ppig PE=1 SV=1                      | 0.943333333 |
| Hddc2    | Q3SXD3 | 5'-deoxynucleotidase HDDC2 OS=Mus musculus OX=10090 GN=Hddc2 PE=1 SV=1                                | 0.8         |
| Ldb1     | P70662 | LIM domain-binding protein 1 OS=Mus musculus OX=10090 GN=Ldb1 PE=1 SV=2                               | 0.643333333 |

|          |        |                                                                                                         |             |
|----------|--------|---------------------------------------------------------------------------------------------------------|-------------|
| Osbp11   | Q8CI95 | Oxysterol-binding protein-related protein 11 OS=Mus musculus OX=10090 GN=Osbp11 PE=1 SV=2               | 1.173333333 |
| Hexim1   | Q8R409 | Protein HEXIM1 OS=Mus musculus OX=10090 GN=Hexim1 PE=1 SV=1                                             | 0.966666667 |
| Rnf214   | Q8BFU3 | RING finger protein 214 OS=Mus musculus OX=10090 GN=Rnf214 PE=1 SV=1                                    | 1.196666667 |
| Naga     | Q9QWR8 | Alpha-N-acetylgalactosaminidase OS=Mus musculus OX=10090 GN=Naga PE=1 SV=2                              | 1.153333333 |
| Nipsnap2 | O55126 | Protein NipSnap homolog 2 OS=Mus musculus OX=10090 GN=Nipsnap2 PE=1 SV=1                                | 0.973333333 |
| 2-Mar    | Q922Q1 | Mitochondrial amidoxime reducing component 2 OS=Mus musculus OX=10090 GN=Mtarc2 PE=1 SV=1               | 0.833333333 |
| Ech1     | O35459 | Delta(3 5)-Delta(2 4)-dienoyl-CoA isomerase mitochondrial OS=Mus musculus OX=10090 GN=Ech1              | 4.313333333 |
| Smc5     | Q8CG46 | Structural maintenance of chromosomes protein 5 OS=Mus musculus OX=10090 GN=Smc5 PE=1 SV=1              | 1.103333333 |
| Rtf1     | A2AQ19 | RNA polymerase-associated protein RTF1 homolog OS=Mus musculus OX=10090 GN=Rtf1 PE=1 SV=1               | 0.926666667 |
| Ythdc2   | B2RR83 | 3'-5' RNA helicase YTHDC2 OS=Mus musculus OX=10090 GN=Ythdc2 PE=1 SV=1                                  | 1.173333333 |
| Ndufa4   | Q62425 | Cytochrome c oxidase subunit NDUF4A OS=Mus musculus OX=10090 GN=Ndufa4 PE=1 SV=2                        | 0.813333333 |
| Dnajb12  | Q9QYI4 | DnaJ homolog subfamily B member 12 OS=Mus musculus OX=10090 GN=Dnajb12 PE=1 SV=2                        | 1.183333333 |
| Echdc1   | Q9D9V3 | Ethylmalonyl-CoA decarboxylase OS=Mus musculus OX=10090 GN=Echdc1 PE=1 SV=2                             | 0.963333333 |
| Pter     | Q60866 | Phosphotriesterase-related protein OS=Mus musculus OX=10090 GN=Pter PE=1 SV=1                           | 0.906666667 |
| Vps53    | Q8CCB4 | Vacuolar protein sorting-associated protein 53 homolog OS=Mus musculus OX=10090 GN=Vps53 PE=1 SV=1      | 0.803333333 |
| Zfyve16  | Q80U44 | Zinc finger FYVE domain-containing protein 16 OS=Mus musculus OX=10090 GN=Zfyve16 PE=1 SV=2             | 1.106666667 |
| Glb1     | P23780 | Beta-galactosidase OS=Mus musculus OX=10090 GN=Glb1 PE=1 SV=1                                           | 1.046666667 |
| Map3k7   | Q62073 | Mitogen-activated protein kinase kinase kinase 7 OS=Mus musculus OX=10090 GN=Map3k7 PE=1 SV=1           | 1.226666667 |
| Pdcd6    | P12815 | Programmed cell death protein 6 OS=Mus musculus OX=10090 GN=Pdcd6 PE=1 SV=2                             | 0.87        |
| Nelfcd   | Q922L6 | Negative elongation factor D OS=Mus musculus OX=10090 GN=Nelfcd PE=1 SV=2                               | 1.13        |
| Vps52    | Q8C754 | Vacuolar protein sorting-associated protein 52 homolog OS=Mus musculus OX=10090 GN=Vps52 PE=1 SV=1      | 1.096666667 |
| Wdr55    | Q9CX97 | WD repeat-containing protein 55 OS=Mus musculus OX=10090 GN=Wdr55 PE=1 SV=2                             | 0.873333333 |
| Dcakd    | Q8BHC4 | Dephospho-CoA kinase domain-containing protein OS=Mus musculus OX=10090 GN=Dcakd PE=1 SV=1              | 0.823333333 |
| Npepl1   | Q6NSR8 | Probable aminopeptidase NPEPL1 OS=Mus musculus OX=10090 GN=Npepl1 PE=1 SV=1                             | 0.856666667 |
| Ppp1r10  | Q80W00 | Serine/threonine-protein phosphatase 1 regulatory subunit 10 OS=Mus musculus OX=10090 GN=Ppp1r10        | 0.696666667 |
| Pdcd2    | P46718 | Programmed cell death protein 2 OS=Mus musculus OX=10090 GN=Pdcd2 PE=2 SV=2                             | 0.95        |
| Ndutf2   | Q59J78 | NADH dehydrogenase [ubiquinone] 1 alpha subcomplex assembly factor 2 OS=Mus musculus OX=10090 GN=Ndutf2 | 0.733333333 |
| Pigk     | Q9CXY9 | GPI-anchor transamidase OS=Mus musculus OX=10090 GN=Pigk PE=1 SV=2                                      | 0.97        |
| Cavin3   | Q91VJ2 | Caveolae-associated protein 3 OS=Mus musculus OX=10090 GN=Cavin3 PE=1 SV=1                              | 0.893333333 |
| Dcp1a    | Q91YD3 | mRNA-decapping enzyme 1A OS=Mus musculus OX=10090 GN=Dcp1a PE=1 SV=1                                    | 0.876666667 |
| Lamtor3  | O88653 | Ragulator complex protein LAMTOR3 OS=Mus musculus OX=10090 GN=Lamtor3 PE=1 SV=1                         | 0.793333333 |
| Cdh3     | P10287 | Cadherin-3 OS=Mus musculus OX=10090 GN=Cdh3 PE=1 SV=2                                                   | 1.446666667 |
| Arpin    | Q9D0A3 | Arpin OS=Mus musculus OX=10090 GN=Arpin PE=1 SV=1                                                       | 0.726666667 |
| Cbl      | P22682 | E3 ubiquitin-protein ligase CBL OS=Mus musculus OX=10090 GN=Cbl PE=1 SV=3                               | 1.06        |

|          |        |                                                                                                            |             |
|----------|--------|------------------------------------------------------------------------------------------------------------|-------------|
| Apbb1ip  | Q8R5A3 | Amyloid beta A4 precursor protein-binding family B member 1-interacting protein OS=Mus musculus            | 0.706666667 |
| Ggcx     | Q9QYC7 | Vitamin K-dependent gamma-carboxylase OS=Mus musculus OX=10090 GN=Ggcx PE=1 SV=1                           | 0.823333333 |
| Eri1     | Q7TMF2 | 3'-5' exoribonuclease 1 OS=Mus musculus OX=10090 GN=Eri1 PE=1 SV=2                                         | 0.93        |
| Ln timer | Q7TQ95 | Endoplasmic reticulum junction formation protein lunapark OS=Mus musculus OX=10090 GN=Ln timer             | 0.923333333 |
| Aldoc    | P05063 | Fructose-bisphosphate aldolase C OS=Mus musculus OX=10090 GN=Aldoc PE=1 SV=4                               |             |
| Arl8a    | Q8VEH3 | ADP-ribosylation factor-like protein 8A OS=Mus musculus OX=10090 GN=Arl8a PE=1 SV=1                        | 0.663333333 |
| Atp2b2   | Q9R0K7 | Plasma membrane calcium-transporting ATPase 2 OS=Mus musculus OX=10090 GN=Atp2b2 PE=1 SV=1                 | 0.826666667 |
| Gfpt2    | Q9Z2Z9 | Glutamine--fructose-6-phosphate aminotransferase [isomerizing] 2 OS=Mus musculus OX=10090 GN=Gfpt2         |             |
| Nr2f1    | Q60632 | COUP transcription factor 1 OS=Mus musculus OX=10090 GN=Nr2f1 PE=2 SV=2                                    | 0.53        |
| Cux1     | P70403 | Protein CASP OS=Mus musculus OX=10090 GN=Cux1 PE=1 SV=2                                                    |             |
| Stk4     | Q9JI11 | Serine/threonine-protein kinase 4 OS=Mus musculus OX=10090 GN=Stk4 PE=1 SV=1                               | 0.713333333 |
| Rab8b    | P61028 | Ras-related protein Rab-8B OS=Mus musculus OX=10090 GN=Rab8b PE=1 SV=1                                     | 0.86        |
| Sptb     | P15508 | Spectrin beta chain erythrocytic OS=Mus musculus OX=10090 GN=Sptb PE=1 SV=4                                | 0.395       |
| Kras     | P32883 | GTPase KRas OS=Mus musculus OX=10090 GN=Kras PE=1 SV=1                                                     | 0.99        |
| Kpna1    | Q60960 | Importin subunit alpha-5 OS=Mus musculus OX=10090 GN=Kpna1 PE=1 SV=2                                       | 0.773333333 |
| Mark3    | Q03141 | MAP/microtubule affinity-regulating kinase 3 OS=Mus musculus OX=10090 GN=Mark3 PE=1 SV=2                   | 1.34        |
| Ifi204   | P0DOV2 | Interferon-activable protein 204 OS=Mus musculus OX=10090 GN=Ifi204 PE=1 SV=1                              | 1.306666667 |
| Ppp3ca   | P63328 | Serine/threonine-protein phosphatase 2B catalytic subunit alpha isoform OS=Mus musculus OX=10090 GN=Ppp3ca | 1.77        |
| Mbnl2    | Q8C181 | Muscleblind-like protein 2 OS=Mus musculus OX=10090 GN=Mbnl2 PE=2 SV=2                                     | 1.116666667 |
| Rab6a    | P35279 | Ras-related protein Rab-6A OS=Mus musculus OX=10090 GN=Rab6a PE=1 SV=4                                     | 0.826666667 |
| Akt2     | Q60823 | RAC-beta serine/threonine-protein kinase OS=Mus musculus OX=10090 GN=Akt2 PE=1 SV=1                        | 0.87        |
| Stk38l   | Q7TSE6 | Serine/threonine-protein kinase 38-like OS=Mus musculus OX=10090 GN=Stk38l PE=1 SV=2                       | 0.89        |
| Itch     | Q8C863 | E3 ubiquitin-protein ligase Itchy OS=Mus musculus OX=10090 GN=Itch PE=1 SV=2                               | 1.133333333 |
| Arid1b   | E9Q4N7 | AT-rich interactive domain-containing protein 1B OS=Mus musculus OX=10090 GN=Arid1b PE=1 SV=1              | 1.093333333 |
| Rab5b    | P61021 | Ras-related protein Rab-5B OS=Mus musculus OX=10090 GN=Rab5b PE=1 SV=1                                     | 0.773333333 |
| Git2     | Q9JLQ2 | ARF GTPase-activating protein GIT2 OS=Mus musculus OX=10090 GN=Git2 PE=1 SV=2                              | 1.153333333 |
| Git1     | Q68FF6 | ARF GTPase-activating protein GIT1 OS=Mus musculus OX=10090 GN=Git1 PE=1 SV=1                              | 0.976666667 |
| Ralb     | Q9JIW9 | Ras-related protein Ral-B OS=Mus musculus OX=10090 GN=Ralb PE=1 SV=1                                       | 0.886666667 |
| Srsf6    | Q3TWW8 | Serine/arginine-rich splicing factor 6 OS=Mus musculus OX=10090 GN=Srsf6 PE=1 SV=1                         | 1.006666667 |
| Raf1     | Q99N57 | RAF proto-oncogene serine/threonine-protein kinase OS=Mus musculus OX=10090 GN=Raf1 PE=1 SV=1              | 0.77        |
| Rras     | P10833 | Ras-related protein R-Ras OS=Mus musculus OX=10090 GN=Rras PE=1 SV=1                                       | 0.8         |
| Ppm1b    | P36993 | Protein phosphatase 1B OS=Mus musculus OX=10090 GN=Ppm1b PE=1 SV=1                                         | 0.926666667 |
| Chd8     | Q09XV5 | Chromodomain-helicase-DNA-binding protein 8 OS=Mus musculus OX=10090 GN=Chd8 PE=1 SV=1                     | 1.13        |
| Cdk14    | O35495 | Cyclin-dependent kinase 14 OS=Mus musculus OX=10090 GN=Cdk14 PE=1 SV=2                                     | 1.21        |



|         |        |                                                                                                                |             |
|---------|--------|----------------------------------------------------------------------------------------------------------------|-------------|
| Ubp1    | Q811S7 | Upstream-binding protein 1 OS=Mus musculus OX=10090 GN=Ubp1 PE=1 SV=1                                          | 1.023333333 |
| Afg3l1  | Q920A7 | AFG3-like protein 1 OS=Mus musculus OX=10090 GN=Afg3l1 PE=1 SV=2                                               | 0.893333333 |
| Cbx5    | Q61686 | Chromobox protein homolog 5 OS=Mus musculus OX=10090 GN=Cbx5 PE=1 SV=1                                         | 0.88        |
| Arl3    | Q9WUL7 | ADP-ribosylation factor-like protein 3 OS=Mus musculus OX=10090 GN=Arl3 PE=1 SV=1                              | 0.883333333 |
| Ppic    | P30412 | Peptidyl-prolyl cis-trans isomerase C OS=Mus musculus OX=10090 GN=Ppic PE=1 SV=1                               | 0.916666667 |
| Dnajb4  | Q9D832 | DnaJ homolog subfamily B member 4 OS=Mus musculus OX=10090 GN=Dnajb4 PE=1 SV=1                                 | 1.03        |
| Pgrmc2  | Q80UU9 | Membrane-associated progesterone receptor component 2 OS=Mus musculus OX=10090 GN=Pgrmc2 PE=1 SV=1             | 0.8         |
| Rela    | Q04207 | Transcription factor p65 OS=Mus musculus OX=10090 GN=Rela PE=1 SV=1                                            | 0.86        |
| Ptbp3   | Q8BHD7 | Polypyrimidine tract-binding protein 3 OS=Mus musculus OX=10090 GN=Ptbp3 PE=1 SV=1                             | 1.06        |
| Ppp6r1  | Q7TSI3 | Serine/threonine-protein phosphatase 6 regulatory subunit 1 OS=Mus musculus OX=10090 GN=Ppp6r1 PE=1 SV=1       | 1.126666667 |
| Srsf5   | O35326 | Serine/arginine-rich splicing factor 5 OS=Mus musculus OX=10090 GN=Srsf5 PE=1 SV=2                             | 0.836666667 |
| Ppp4r3a | Q6P2K6 | Serine/threonine-protein phosphatase 4 regulatory subunit 3A OS=Mus musculus OX=10090 GN=Ppp4r3a PE=1 SV=1     | 1.386666667 |
| Celf2   | Q9Z0H4 | CUGBP Elav-like family member 2 OS=Mus musculus OX=10090 GN=Celf2 PE=1 SV=1                                    | 1.056666667 |
| A2m     | Q6GQT1 | Alpha-2-macroglobulin-P OS=Mus musculus OX=10090 GN=A2m PE=2 SV=2                                              | 0.066666667 |
| Trim33  | Q99PP7 | E3 ubiquitin-protein ligase TRIM33 OS=Mus musculus OX=10090 GN=Trim33 PE=1 SV=2                                | 1.16        |
| Gnpda2  | Q9CRC9 | Glucosamine-6-phosphate isomerase 2 OS=Mus musculus OX=10090 GN=Gnpda2 PE=1 SV=1                               | 0.97        |
| Ewsr1   | Q61545 | RNA-binding protein EWS OS=Mus musculus OX=10090 GN=Ewsr1 PE=1 SV=2                                            | 0.81        |
| Sod1    | P08228 | Superoxide dismutase [Cu-Zn] OS=Mus musculus OX=10090 GN=Sod1 PE=1 SV=2                                        | 0.876666667 |
| Psmb4   | P99026 | Proteasome subunit beta type-4 OS=Mus musculus OX=10090 GN=Psmb4 PE=1 SV=1                                     | 0.91        |
| Armxc2  | Q6A058 | Armadillo repeat-containing X-linked protein 2 OS=Mus musculus OX=10090 GN=Armxc2 PE=2 SV=1                    | 0.893333333 |
| Alad    | P10518 | Delta-aminolevulinic acid dehydratase OS=Mus musculus OX=10090 GN=Alad PE=1 SV=1                               | 0.946666667 |
| Pdap1   | Q3UHX2 | 28 kDa heat- and acid-stable phosphoprotein OS=Mus musculus OX=10090 GN=Pdap1 PE=1 SV=1                        | 0.84        |
| Cfdp1   | O88271 | Craniofacial development protein 1 OS=Mus musculus OX=10090 GN=Cfdp1 PE=1 SV=1                                 | 0.936666667 |
| Prmt3   | Q922H1 | Protein arginine N-methyltransferase 3 OS=Mus musculus OX=10090 GN=Prmt3 PE=1 SV=2                             | 0.91        |
| Tmed10  | Q9D1D4 | Transmembrane emp24 domain-containing protein 10 OS=Mus musculus OX=10090 GN=Tmed10 PE=1 SV=1                  | 0.923333333 |
| Rpl23   | P62830 | 60S ribosomal protein L23 OS=Mus musculus OX=10090 GN=Rpl23 PE=1 SV=1                                          | 0.883333333 |
| Bax     | Q07813 | Apoptosis regulator BAX OS=Mus musculus OX=10090 GN=Bax PE=1 SV=1                                              | 0.866666667 |
| Get4    | Q9D1H7 | Golgi to ER traffic protein 4 homolog OS=Mus musculus OX=10090 GN=Get4 PE=1 SV=2                               | 0.866666667 |
| Lxn     | P70202 | Latexin OS=Mus musculus OX=10090 GN=Lxn PE=1 SV=2                                                              | 0.943333333 |
| Stoml2  | Q99JB2 | Stomatin-like protein 2 mitochondrial OS=Mus musculus OX=10090 GN=Stoml2 PE=1 SV=1                             | 0.88        |
| Strip1  | Q8C079 | Striatin-interacting protein 1 OS=Mus musculus OX=10090 GN=Strip1 PE=1 SV=2                                    | 0.816666667 |
| Psmb2   | Q9R1P3 | Proteasome subunit beta type-2 OS=Mus musculus OX=10090 GN=Psmb2 PE=1 SV=1                                     | 0.846666667 |
| Ociad1  | Q9CRD0 | OCIA domain-containing protein 1 OS=Mus musculus OX=10090 GN=Ociad1 PE=1 SV=1                                  | 0.813333333 |
| Hmgn5   | Q9JL35 | High mobility group nucleosome-binding domain-containing protein 5 OS=Mus musculus OX=10090 GN=Hmgn5 PE=1 SV=1 | 0.84        |

|           |        |                                                                                                                     |
|-----------|--------|---------------------------------------------------------------------------------------------------------------------|
| M6pr      | P24668 | Cation-dependent mannose-6-phosphate receptor OS=Mus musculus OX=10090 GN=M6pr PE=1 SV= 0.806666667                 |
| Poldip2   | Q91VA6 | Polymerase delta-interacting protein 2 OS=Mus musculus OX=10090 GN=Poldip2 PE=1 SV=1 0.856666667                    |
| Fkbp8     | O35465 | Peptidyl-prolyl cis-trans isomerase FKBP8 OS=Mus musculus OX=10090 GN=Fkbp8 PE=1 SV=2 0.853333333                   |
| Axl       | Q00993 | Tyrosine-protein kinase receptor UFO OS=Mus musculus OX=10090 GN=Axl PE=1 SV=2 0.826666667                          |
| Nt5c3b    | Q3UFY7 | 7-methylguanosine phosphate-specific 5'-nucleotidase OS=Mus musculus OX=10090 GN=Nt5c3b PE=1 SV=1 0.893333333       |
| Fkbp2     | P45878 | Peptidyl-prolyl cis-trans isomerase FKBP2 OS=Mus musculus OX=10090 GN=Fkbp2 PE=1 SV=1 0.906666667                   |
| Grpel1    | Q99LP6 | GrpE protein homolog 1 mitochondrial OS=Mus musculus OX=10090 GN=Grpel1 PE=1 SV=1 0.863333333                       |
| Otud4     | B2RRE7 | OTU domain-containing protein 4 OS=Mus musculus OX=10090 GN=Otud4 PE=1 SV=1 0.96                                    |
| Map2k3    | O09110 | Dual specificity mitogen-activated protein kinase kinase 3 OS=Mus musculus OX=10090 GN=Map2k3 PE=1 SV=1 0.786666667 |
| Rrp9      | Q91WM3 | U3 small nucleolar RNA-interacting protein 2 OS=Mus musculus OX=10090 GN=Rrp9 PE=1 SV=1 0.91                        |
| Comt      | O88587 | Catechol O-methyltransferase OS=Mus musculus OX=10090 GN=Comt PE=1 SV=2 0.906666667                                 |
| Ciapi1    | Q8WTY4 | Anamorsin OS=Mus musculus OX=10090 GN=Ciapi1 PE=1 SV=1 0.9                                                          |
| Sfr1      | Q8BP27 | Swi5-dependent recombination DNA repair protein 1 homolog OS=Mus musculus OX=10090 GN=Sfr1 PE=1 SV=1 0.79           |
| Mlec      | Q6ZQI3 | Malectin OS=Mus musculus OX=10090 GN=Mlec PE=1 SV=2 1.01                                                            |
| Ttc1      | Q91Z38 | Tetratricopeptide repeat protein 1 OS=Mus musculus OX=10090 GN=Ttc1 PE=1 SV=1 0.886666667                           |
| Tut7      | Q5BLK4 | Terminal uridylyltransferase 7 OS=Mus musculus OX=10090 GN=Tut7 PE=1 SV=3 0.96                                      |
| Aldh16a1  | Q571I9 | Aldehyde dehydrogenase family 16 member A1 OS=Mus musculus OX=10090 GN=Aldh16a1 PE=1 SV=1 0.893333333               |
| Rrp1      | P56183 | Ribosomal RNA processing protein 1 homolog A OS=Mus musculus OX=10090 GN=Rrp1 PE=1 SV=2 1.096666667                 |
| Fmn1      | Q05860 | Formin-1 OS=Mus musculus OX=10090 GN=Fmn1 PE=1 SV=2 0.746666667                                                     |
| Cbfb      | Q08024 | Core-binding factor subunit beta OS=Mus musculus OX=10090 GN=Cbfb PE=1 SV=1 0.946666667                             |
| Mad2l1    | Q9Z1B5 | Mitotic spindle assembly checkpoint protein MAD2A OS=Mus musculus OX=10090 GN=Mad2l1 PE=1 SV=1 0.93                 |
| Bcl2l13   | P59017 | Bcl-2-like protein 13 OS=Mus musculus OX=10090 GN=Bcl2l13 PE=1 SV=2 1.006666667                                     |
| Armc8     | Q9DBR3 | Armadillo repeat-containing protein 8 OS=Mus musculus OX=10090 GN=Armc8 PE=1 SV=2 0.856666667                       |
| Atp5pb    | Q9CQQ7 | ATP synthase F(0) complex subunit B1 mitochondrial OS=Mus musculus OX=10090 GN=Atp5pb PE=1 SV=1 0.913333333         |
| Sik3      | Q6P4S6 | Serine/threonine-protein kinase SIK3 OS=Mus musculus OX=10090 GN=Sik3 PE=1 SV=3 1.02                                |
| Mmut      | P16332 | Methylmalonyl-CoA mutase mitochondrial OS=Mus musculus OX=10090 GN=Mmut PE=1 SV=2 0.84                              |
| Nudt9     | Q8BVU5 | ADP-ribose pyrophosphatase mitochondrial OS=Mus musculus OX=10090 GN=Nudt9 PE=1 SV=1 0.98                           |
| Acadm     | P45952 | Medium-chain specific acyl-CoA dehydrogenase mitochondrial OS=Mus musculus OX=10090 GN=Acadm PE=1 SV=1 0.906666667  |
| Fcho2     | Q3UQN2 | F-BAR domain only protein 2 OS=Mus musculus OX=10090 GN=Fcho2 PE=1 SV=1 1.023333333                                 |
| Rpl30     | P62889 | 60S ribosomal protein L30 OS=Mus musculus OX=10090 GN=Rpl30 PE=1 SV=2 0.973333333                                   |
| Gamt      | O35969 | Guanidinoacetate N-methyltransferase OS=Mus musculus OX=10090 GN=Gamt PE=1 SV=1 0.846666667                         |
| Mvk       | Q9R008 | Mevalonate kinase OS=Mus musculus OX=10090 GN=Mvk PE=1 SV=1 0.92                                                    |
| Yy1       | Q00899 | Transcriptional repressor protein YY1 OS=Mus musculus OX=10090 GN=Yy1 PE=1 SV=1 0.86                                |
| Rab11fip5 | Q8R361 | Rab11 family-interacting protein 5 OS=Mus musculus OX=10090 GN=Rab11fip5 PE=1 SV=2 0.846666667                      |

|         |        |                                                                                              |             |
|---------|--------|----------------------------------------------------------------------------------------------|-------------|
| Alg2    | Q9DBE8 | Alpha-1 3/1 6-mannosyltransferase ALG2 OS=Mus musculus OX=10090 GN=Alg2 PE=1 SV=2            | 0.92        |
| Zc3h18  | Q0P678 | Zinc finger CCCH domain-containing protein 18 OS=Mus musculus OX=10090 GN=Zc3h18 PE=1 SV=    | 0.706666667 |
| Cwc27   | Q3TKY6 | Spliceosome-associated protein CWC27 homolog OS=Mus musculus OX=10090 GN=Cwc27 PE=1 SV       | 0.95        |
| Hexa    | P29416 | Beta-hexosaminidase subunit alpha OS=Mus musculus OX=10090 GN=Hexa PE=1 SV=2                 | 0.94        |
| Prpf4b  | Q61136 | Serine/threonine-protein kinase PRP4 homolog OS=Mus musculus OX=10090 GN=Prpf4b PE=1 SV=3    | 0.723333333 |
| Cav1    | P49817 | Caveolin-1 OS=Mus musculus OX=10090 GN=Cav1 PE=1 SV=1                                        | 0.853333333 |
| Cpped1  | Q8BFS6 | Serine/threonine-protein phosphatase CPPED1 OS=Mus musculus OX=10090 GN=Cpped1 PE=1 SV=      | 0.82        |
| Psme2   | P97372 | Proteasome activator complex subunit 2 OS=Mus musculus OX=10090 GN=Psme2 PE=1 SV=4           | 0.886666667 |
| Mcat    | Q8R3F5 | Malonyl-CoA-acyl carrier protein transacylase mitochondrial OS=Mus musculus OX=10090 GN=Mca  | 1.036666667 |
| Ivd     | Q9JHI5 | Isovaleryl-CoA dehydrogenase mitochondrial OS=Mus musculus OX=10090 GN=Ivd PE=1 SV=1         | 0.826666667 |
| Ctc1    | Q5SUQ9 | CST complex subunit CTC1 OS=Mus musculus OX=10090 GN=Ctc1 PE=1 SV=2                          | 0.906666667 |
| Ak1     | Q9R0Y5 | Adenylate kinase isoenzyme 1 OS=Mus musculus OX=10090 GN=Ak1 PE=1 SV=1                       | 0.91        |
| Wdr33   | Q8K4P0 | pre-mRNA 3' end processing protein WDR33 OS=Mus musculus OX=10090 GN=Wdr33 PE=1 SV=1         | 1.113333333 |
| Armt1   | A6H630 | Damage-control phosphatase ARMT1 OS=Mus musculus OX=10090 GN=Armt1 PE=1 SV=1                 | 1.106666667 |
| Htt     | P42859 | Huntingtin OS=Mus musculus OX=10090 GN=Htt PE=1 SV=2                                         | 1.18        |
| Ccnd1   | P25322 | G1/S-specific cyclin-D1 OS=Mus musculus OX=10090 GN=Ccnd1 PE=1 SV=1                          | 1.12        |
| Arl1    | P61211 | ADP-ribosylation factor-like protein 1 OS=Mus musculus OX=10090 GN=Arl1 PE=1 SV=1            | 0.883333333 |
| Spg21   | Q9CQC8 | Maspardin OS=Mus musculus OX=10090 GN=Spg21 PE=1 SV=1                                        | 0.82        |
| Adpgk   | Q8VDL4 | ADP-dependent glucokinase OS=Mus musculus OX=10090 GN=Adpgk PE=1 SV=2                        | 0.836666667 |
| Nol9    | Q3TZX8 | Polynucleotide 5'-hydroxyl-kinase NOL9 OS=Mus musculus OX=10090 GN=Nol9 PE=1 SV=1            | 0.996666667 |
| Echs1   | Q8BH95 | Enoyl-CoA hydratase mitochondrial OS=Mus musculus OX=10090 GN=Echs1 PE=1 SV=1                | 0.89        |
| Pofut1  | Q91ZW2 | GDP-fucose protein O-fucosyltransferase 1 OS=Mus musculus OX=10090 GN=Pofut1 PE=1 SV=1       | 0.81        |
| Rab32   | Q9CZE3 | Ras-related protein Rab-32 OS=Mus musculus OX=10090 GN=Rab32 PE=1 SV=3                       | 0.886666667 |
| Golga5  | Q9QYE6 | Golgin subfamily A member 5 OS=Mus musculus OX=10090 GN=Golga5 PE=1 SV=2                     | 0.766666667 |
| Tsg101  | Q61187 | Tumor susceptibility gene 101 protein OS=Mus musculus OX=10090 GN=Tsg101 PE=1 SV=2           | 0.81        |
| Map3k20 | Q9ESL4 | Mitogen-activated protein kinase kinase kinase 20 OS=Mus musculus OX=10090 GN=Map3k20 PE=1   | 0.91        |
| Washc1  | Q8VDD8 | WASH complex subunit 1 OS=Mus musculus OX=10090 GN=Washc1 PE=1 SV=1                          | 1.06        |
| Nmd3    | Q99L48 | 60S ribosomal export protein NMD3 OS=Mus musculus OX=10090 GN=Nmd3 PE=1 SV=1                 | 0.843333333 |
| Pfdn5   | Q9WU28 | Prefoldin subunit 5 OS=Mus musculus OX=10090 GN=Pfdn5 PE=1 SV=1                              | 0.91        |
| Adrm1   | Q9JKV1 | Proteasomal ubiquitin receptor ADRM1 OS=Mus musculus OX=10090 GN=Adrm1 PE=1 SV=2             | 0.833333333 |
| Slc7a1  | Q09143 | High affinity cationic amino acid transporter 1 OS=Mus musculus OX=10090 GN=Slc7a1 PE=1 SV=1 | 0.94        |
| Rprd2   | Q6NXI6 | Regulation of nuclear pre-mRNA domain-containing protein 2 OS=Mus musculus OX=10090 GN=Rpr   | 1.053333333 |
| Qki     | Q9QYS9 | Protein quaking OS=Mus musculus OX=10090 GN=Qki PE=1 SV=1                                    | 0.823333333 |
| Mtx2    | O88441 | Metaxin-2 OS=Mus musculus OX=10090 GN=Mtx2 PE=1 SV=1                                         | 1.11        |

|         |        |                                                                                                 |             |
|---------|--------|-------------------------------------------------------------------------------------------------|-------------|
| Smpd2   | O70572 | Sphingomyelin phosphodiesterase 2 OS=Mus musculus OX=10090 GN=Smpd2 PE=1 SV=1                   | 0.943333333 |
| Shcbp1  | Q9Z179 | SHC SH2 domain-binding protein 1 OS=Mus musculus OX=10090 GN=Shcbp1 PE=1 SV=1                   | 0.716666667 |
| Pcid2   | Q8BFV2 | PCI domain-containing protein 2 OS=Mus musculus OX=10090 GN=Pcid2 PE=1 SV=1                     | 0.91        |
| Fer     | P70451 | Tyrosine-protein kinase Fer OS=Mus musculus OX=10090 GN=Fer PE=1 SV=2                           | 0.9         |
| Babam1  | Q3UI43 | BRISC and BRCA1-A complex member 1 OS=Mus musculus OX=10090 GN=Babam1 PE=1 SV=1                 | 0.8         |
| Osgp    | Q8BWU5 | Probable tRNA N6-adenosine threonylcarbamoyltransferase OS=Mus musculus OX=10090 GN=Osgp        | 0.81        |
| Phldb2  | Q8K1N2 | Pleckstrin homology-like domain family B member 2 OS=Mus musculus OX=10090 GN=Phldb2 PE=1       | 0.82        |
| Snap47  | Q8R570 | Synaptosomal-associated protein 47 OS=Mus musculus OX=10090 GN=Snap47 PE=1 SV=1                 | 0.83        |
| Lsg1    | Q3UM18 | Large subunit GTPase 1 homolog OS=Mus musculus OX=10090 GN=Lsg1 PE=1 SV=2                       | 0.836666667 |
| Unc45a  | Q99KD5 | Protein unc-45 homolog A OS=Mus musculus OX=10090 GN=Unc45a PE=1 SV=2                           | 0.806666667 |
| Dag1    | Q62165 | Dystroglycan OS=Mus musculus OX=10090 GN=Dag1 PE=1 SV=4                                         | 0.756666667 |
| Ints2   | Q80UK8 | Integrator complex subunit 2 OS=Mus musculus OX=10090 GN=Ints2 PE=1 SV=2                        | 0.973333333 |
| Abhd14b | Q8VCR7 | Protein ABHD14B OS=Mus musculus OX=10090 GN=Abhd14b PE=1 SV=1                                   | 0.79        |
| Pdzd8   | B9EJ80 | PDZ domain-containing protein 8 OS=Mus musculus OX=10090 GN=Pdzd8 PE=1 SV=1                     | 0.783333333 |
| Spin1   | Q61142 | Spindlin-1 OS=Mus musculus OX=10090 GN=Spin1 PE=1 SV=2                                          | 0.78        |
| Smarcb1 | Q9Z0H3 | SWI/SNF-related matrix-associated actin-dependent regulator of chromatin subfamily B member 1 ( | 0.89        |
| Gmppa   | Q922H4 | Mannose-1-phosphate guanylttransferase alpha OS=Mus musculus OX=10090 GN=Gmppa PE=1 SV=1        | 0.916666667 |
| Slc5a3  | Q9JKZ2 | Sodium/myo-inositol cotransporter OS=Mus musculus OX=10090 GN=Slc5a3 PE=1 SV=2                  | 0.866666667 |
| Nob1    | Q8BW10 | RNA-binding protein NOB1 OS=Mus musculus OX=10090 GN=Nob1 PE=1 SV=1                             | 0.88        |
| Smad4   | P97471 | Mothers against decapentaplegic homolog 4 OS=Mus musculus OX=10090 GN=Smad4 PE=1 SV=2           | 0.83        |
| Exosc7  | Q9D0M0 | Exosome complex exonuclease RRP42 OS=Mus musculus OX=10090 GN=Exosc7 PE=1 SV=2                  | 0.85        |
| Nudcd3  | Q8R1N4 | NudC domain-containing protein 3 OS=Mus musculus OX=10090 GN=Nudcd3 PE=1 SV=3                   | 0.853333333 |
| Hm13    | Q9D8V0 | Minor histocompatibility antigen H13 OS=Mus musculus OX=10090 GN=Hm13 PE=1 SV=1                 | 0.853333333 |
| Pkd2    | O35245 | Polycystin-2 OS=Mus musculus OX=10090 GN=Pkd2 PE=1 SV=2                                         | 0.89        |
| Mak16   | Q8BGS0 | Protein MAK16 homolog OS=Mus musculus OX=10090 GN=Mak16 PE=1 SV=1                               | 0.85        |
| Dbr1    | Q923B1 | Lariat debranching enzyme OS=Mus musculus OX=10090 GN=Dbr1 PE=1 SV=2                            | 0.943333333 |
| App     | P12023 | Amyloid-beta A4 protein OS=Mus musculus OX=10090 GN=App PE=1 SV=3                               | 1.003333333 |
| Nelfe   | P19426 | Negative elongation factor E OS=Mus musculus OX=10090 GN=Nelfe PE=1 SV=2                        | 0.713333333 |
| Qrich1  | Q3UA37 | Glutamine-rich protein 1 OS=Mus musculus OX=10090 GN=Qrich1 PE=1 SV=1                           | 0.833333333 |
| Ube2m   | P61082 | NEDD8-conjugating enzyme Ubc12 OS=Mus musculus OX=10090 GN=Ube2m PE=1 SV=1                      | 0.916666667 |
| IntS13  | Q8QZV7 | Integrator complex subunit 13 OS=Mus musculus OX=10090 GN=IntS13 PE=1 SV=2                      | 0.716666667 |
| Fbxo4   | Q8CHQ0 | F-box only protein 4 OS=Mus musculus OX=10090 GN=Fbxo4 PE=1 SV=2                                | 0.926666667 |
| Chaf1b  | Q9D0N7 | Chromatin assembly factor 1 subunit B OS=Mus musculus OX=10090 GN=Chaf1b PE=1 SV=1              | 0.876666667 |
| Chtf18  | Q8BIW9 | Chromosome transmission fidelity protein 18 homolog OS=Mus musculus OX=10090 GN=Chtf18 PE=1     | 0.963333333 |

|          |        |                                                                                                                       |             |
|----------|--------|-----------------------------------------------------------------------------------------------------------------------|-------------|
| Vps28    | Q9D1C8 | Vacuolar protein sorting-associated protein 28 homolog OS=Mus musculus OX=10090 GN=Vps28 PE=1 SV=1                    | 0.963333333 |
| Nmral1   | Q8K2T1 | NmrA-like family domain-containing protein 1 OS=Mus musculus OX=10090 GN=Nmral1 PE=1 SV=1                             | 0.83        |
| Cdh11    | P55288 | Cadherin-11 OS=Mus musculus OX=10090 GN=Cdh11 PE=1 SV=1                                                               | 0.93        |
| Rpl28    | P41105 | 60S ribosomal protein L28 OS=Mus musculus OX=10090 GN=Rpl28 PE=1 SV=2                                                 | 0.923333333 |
| Stx7     | O70439 | Syntaxin-7 OS=Mus musculus OX=10090 GN=Stx7 PE=1 SV=3                                                                 | 0.776666667 |
| Usp36    | B1AQJ2 | Ubiquitin carboxyl-terminal hydrolase 36 OS=Mus musculus OX=10090 GN=Usp36 PE=1 SV=1                                  | 1.093333333 |
| Fntb     | Q8K2I1 | Protein farnesyltransferase subunit beta OS=Mus musculus OX=10090 GN=Fntb PE=1 SV=1                                   | 1.016666667 |
| Ripor1   | Q68FE6 | Rho family-interacting cell polarization regulator 1 OS=Mus musculus OX=10090 GN=Ripor1 PE=1 SV=1                     | 1.176666667 |
| Fdft1    | P53798 | Squalene synthase OS=Mus musculus OX=10090 GN=Fdft1 PE=1 SV=2                                                         | 1.073333333 |
| Hsd17b11 | Q9EQ06 | Estradiol 17-beta-dehydrogenase 11 OS=Mus musculus OX=10090 GN=Hsd17b11 PE=1 SV=1                                     | 0.96        |
| Atad1    | Q9D5T0 | ATPase family AAA domain-containing protein 1 OS=Mus musculus OX=10090 GN=Atad1 PE=1 SV=1                             | 0.986666667 |
| Mavs     | Q8VCF0 | Mitochondrial antiviral-signaling protein OS=Mus musculus OX=10090 GN=Mavs PE=1 SV=1                                  | 0.893333333 |
| Akap1    | O08715 | A-kinase anchor protein 1 mitochondrial OS=Mus musculus OX=10090 GN=Akap1 PE=1 SV=4                                   | 0.846666667 |
| Ccnh     | Q61458 | Cyclin-H OS=Mus musculus OX=10090 GN=Ccnh PE=1 SV=2                                                                   | 0.813333333 |
| Coasy    | Q9DBL7 | Bifunctional coenzyme A synthase OS=Mus musculus OX=10090 GN=Coasy PE=1 SV=2                                          | 0.88        |
| Stt3b    | Q3TDQ1 | Dolichyl-diphosphooligosaccharide--protein glycosyltransferase subunit STT3B OS=Mus musculus C                        | 1.3         |
| Decr1    | Q9CQ62 | 2 4-dienoyl-CoA reductase mitochondrial OS=Mus musculus OX=10090 GN=Decr1 PE=1 SV=1                                   | 0.846666667 |
| Fnta     | Q61239 | Protein farnesyltransferase/geranylgeranyltransferase type-1 subunit alpha OS=Mus musculus OX=10090 GN=Fnta PE=1 SV=1 | 0.883333333 |
| Trmt2a   | Q8BNV1 | tRNA(uracil-5-)-methyltransferase homolog A OS=Mus musculus OX=10090 GN=Trmt2a PE=1 SV=1                              | 0.83        |
| Tbc1d5   | Q80XQ2 | TBC1 domain family member 5 OS=Mus musculus OX=10090 GN=Tbc1d5 PE=1 SV=2                                              | 0.813333333 |
| Tacc3    | Q9JJ11 | Transforming acidic coiled-coil-containing protein 3 OS=Mus musculus OX=10090 GN=Tacc3 PE=1 SV=1                      | 0.783333333 |
| Top3b    | Q9Z321 | DNA topoisomerase 3-beta-1 OS=Mus musculus OX=10090 GN=Top3b PE=1 SV=1                                                | 0.93        |
| Dnaja3   | Q99M87 | DnaJ homolog subfamily A member 3 mitochondrial OS=Mus musculus OX=10090 GN=Dnaja3 PE=1 SV=1                          | 0.876666667 |
| Rpl13a   | P19253 | 60S ribosomal protein L13a OS=Mus musculus OX=10090 GN=Rpl13a PE=1 SV=4                                               | 0.926666667 |
| Mrpl4    | Q9DCU6 | 39S ribosomal protein L4 mitochondrial OS=Mus musculus OX=10090 GN=Mrpl4 PE=1 SV=1                                    | 0.923333333 |
| Stx5     | Q8K1E0 | Syntaxin-5 OS=Mus musculus OX=10090 GN=Stx5 PE=1 SV=3                                                                 | 0.916666667 |
| Ndufs3   | Q9DCT2 | NADH dehydrogenase [ubiquinone] iron-sulfur protein 3 mitochondrial OS=Mus musculus OX=10090 GN=Ndufs3 PE=1 SV=1      | 0.866666667 |
| Gba      | P17439 | Lysosomal acid glucosylceramidase OS=Mus musculus OX=10090 GN=Gba PE=1 SV=1                                           | 0.693333333 |
| LRWD1    | Q8BUI3 | Leucine-rich repeat and WD repeat-containing protein 1 OS=Mus musculus OX=10090 GN=LRWD1 PE=1 SV=1                    | 0.983333333 |
| Shc1     | P98083 | SHC-transforming protein 1 OS=Mus musculus OX=10090 GN=Shc1 PE=1 SV=3                                                 | 0.82        |
| Cdc42bpa | Q3UU96 | Serine/threonine-protein kinase MRCK alpha OS=Mus musculus OX=10090 GN=Cdc42bpa PE=1 SV=1                             | 1.08        |
| Kdm3b    | Q6ZPY7 | Lysine-specific demethylase 3B OS=Mus musculus OX=10090 GN=Kdm3b PE=1 SV=2                                            | 1.066666667 |
| Polr2e   | Q80UW8 | DNA-directed RNA polymerases I II and III subunit RPABC1 OS=Mus musculus OX=10090 GN=Polr2e PE=1 SV=1                 | 1.04        |
| Exoc8    | Q6PGF7 | Exocyst complex component 8 OS=Mus musculus OX=10090 GN=Exoc8 PE=1 SV=1                                               | 0.796666667 |



|          |        |                                                                                                |             |
|----------|--------|------------------------------------------------------------------------------------------------|-------------|
| Abhd12   | Q99LR1 | Lysophosphatidylserine lipase ABHD12 OS=Mus musculus OX=10090 GN=Abhd12 PE=1 SV=2              | 1.003333333 |
| Mpp6     | Q9JLB0 | MAGUK p55 subfamily member 6 OS=Mus musculus OX=10090 GN=Mpp6 PE=1 SV=1                        | 0.95        |
| Vps45    | P97390 | Vacuolar protein sorting-associated protein 45 OS=Mus musculus OX=10090 GN=Vps45 PE=1 SV=1     | 0.83        |
| Pcyox1l  | Q8C7K6 | Prenylcysteine oxidase-like OS=Mus musculus OX=10090 GN=Pcyox1l PE=1 SV=1                      | 0.863333333 |
| Snu13    | Q9D0T1 | NHP2-like protein 1 OS=Mus musculus OX=10090 GN=Snu13 PE=1 SV=4                                | 0.906666667 |
| Apip     | Q9WVQ5 | Methylthioribulose-1-phosphate dehydratase OS=Mus musculus OX=10090 GN=Apip PE=1 SV=1          | 0.81        |
| Atp6v1e1 | P50518 | V-type proton ATPase subunit E 1 OS=Mus musculus OX=10090 GN=Atp6v1e1 PE=1 SV=2                | 0.816666667 |
| Rnaseh2a | Q9CWY8 | Ribonuclease H2 subunit A OS=Mus musculus OX=10090 GN=Rnaseh2a PE=1 SV=2                       | 0.943333333 |
| Tcf20    | Q9EPQ8 | Transcription factor 20 OS=Mus musculus OX=10090 GN=Tcf20 PE=1 SV=3                            | 0.87        |
| Mycbp2   | Q7TPH6 | E3 ubiquitin-protein ligase MYCBP2 OS=Mus musculus OX=10090 GN=Mycbp2 PE=1 SV=3                | 1.126666667 |
| Pole     | Q9WVF7 | DNA polymerase epsilon catalytic subunit A OS=Mus musculus OX=10090 GN=Pole PE=1 SV=3          | 0.686666667 |
| Pih1d1   | Q9CQJ2 | PIH1 domain-containing protein 1 OS=Mus musculus OX=10090 GN=Pih1d1 PE=1 SV=1                  | 0.886666667 |
| Cc2d1a   | Q8K1A6 | Coiled-coil and C2 domain-containing protein 1A OS=Mus musculus OX=10090 GN=Cc2d1a PE=1 SV=1   | 0.943333333 |
| Dennd4c  | A6H8H2 | DENN domain-containing protein 4C OS=Mus musculus OX=10090 GN=Dennd4c PE=1 SV=1                | 0.876666667 |
| Exoc5    | Q3TPX4 | Exocyst complex component 5 OS=Mus musculus OX=10090 GN=Exoc5 PE=1 SV=2                        | 1.256666667 |
| Krr1     | Q8BGA5 | KRR1 small subunit processome component homolog OS=Mus musculus OX=10090 GN=Krr1 PE=2 SV=1     | 0.853333333 |
| Slc9a3r1 | P70441 | Na(+)/H(+) exchange regulatory cofactor NHE-RF1 OS=Mus musculus OX=10090 GN=Slc9a3r1 PE=1 SV=1 | 0.766666667 |
| Rbbp5    | Q8BX09 | Retinoblastoma-binding protein 5 OS=Mus musculus OX=10090 GN=Rbbp5 PE=1 SV=2                   | 0.92        |
| Sacs     | Q9JLC8 | Sacsin OS=Mus musculus OX=10090 GN=Sacs PE=1 SV=2                                              | 1.43        |
| Osbpl8   | B9EJ86 | Oxysterol-binding protein-related protein 8 OS=Mus musculus OX=10090 GN=Osbpl8 PE=1 SV=1       | 0.806666667 |
| Prpc     | Q7TMR0 | Lysosomal Pro-X carboxypeptidase OS=Mus musculus OX=10090 GN=Prpc PE=1 SV=2                    | 0.963333333 |
| Tubgcp4  | Q9D4F8 | Gamma-tubulin complex component 4 OS=Mus musculus OX=10090 GN=Tubgcp4 PE=1 SV=2                | 0.796666667 |
| Reps1    | O54916 | RalBP1-associated Eps domain-containing protein 1 OS=Mus musculus OX=10090 GN=Reps1 PE=1 SV=1  | 0.94        |
| Odr4     | Q4PJX1 | Protein odr-4 homolog OS=Mus musculus OX=10090 GN=Odr4 PE=1 SV=2                               | 0.866666667 |
| Rbm34    | Q8C5L7 | RNA-binding protein 34 OS=Mus musculus OX=10090 GN=Rbm34 PE=1 SV=2                             | 0.896666667 |
| Ppil4    | Q9CXG3 | Peptidyl-prolyl cis-trans isomerase-like 4 OS=Mus musculus OX=10090 GN=Ppil4 PE=1 SV=2         | 1.19        |
| Fam50a   | Q9WV03 | Protein FAM50A OS=Mus musculus OX=10090 GN=Fam50a PE=1 SV=1                                    | 0.906666667 |
| Agk      | Q9ESW4 | Acylglycerol kinase mitochondrial OS=Mus musculus OX=10090 GN=Agk PE=1 SV=1                    | 0.9         |
| Atp6v0d1 | P51863 | V-type proton ATPase subunit d 1 OS=Mus musculus OX=10090 GN=Atp6v0d1 PE=1 SV=2                | 0.923333333 |
| Fnbp4    | Q6ZQ03 | Formin-binding protein 4 OS=Mus musculus OX=10090 GN=Fnbp4 PE=1 SV=2                           | 0.746666667 |
| Limd1    | Q9QXD8 | LIM domain-containing protein 1 OS=Mus musculus OX=10090 GN=Limd1 PE=1 SV=2                    | 0.706666667 |
| Morc3    | F7BJB9 | MORC family CW-type zinc finger protein 3 OS=Mus musculus OX=10090 GN=Morc3 PE=1 SV=1          | 0.706666667 |
| Grk2     | Q99MK8 | Beta-adrenergic receptor kinase 1 OS=Mus musculus OX=10090 GN=Grk2 PE=1 SV=2                   | 0.886666667 |
| Erp29    | P57759 | Endoplasmic reticulum resident protein 29 OS=Mus musculus OX=10090 GN=Erp29 PE=1 SV=2          | 0.916666667 |

|          |        |                                                                                                                                       |             |
|----------|--------|---------------------------------------------------------------------------------------------------------------------------------------|-------------|
| Gclc     | P97494 | Glutamate--cysteine ligase catalytic subunit OS=Mus musculus OX=10090 GN=Gclc PE=1 SV=4                                               | 0.776666667 |
| Cwc22    | Q8C5N3 | Pre-mRNA-splicing factor CWC22 homolog OS=Mus musculus OX=10090 GN=Cwc22 PE=1 SV=1                                                    | 0.893333333 |
| Dlgap5   | Q8K4R9 | Disks large-associated protein 5 OS=Mus musculus OX=10090 GN=Dlgap5 PE=1 SV=2                                                         | 1.036666667 |
| Mrps31   | Q61733 | 28S ribosomal protein S31 mitochondrial OS=Mus musculus OX=10090 GN=Mrps31 PE=1 SV=1                                                  | 0.906666667 |
| Irgm1    | Q60766 | Immunity-related GTPase family M protein 1 OS=Mus musculus OX=10090 GN=Irgm1 PE=1 SV=1                                                | 0.836666667 |
| Exosc8   | Q9D753 | Exosome complex component RRP43 OS=Mus musculus OX=10090 GN=Exosc8 PE=1 SV=1                                                          | 0.873333333 |
| Dbt      | P53395 | Lipoamide acyltransferase component of branched-chain alpha-keto acid dehydrogenase complex OS=Mus musculus OX=10090 GN=Dbt PE=1 SV=1 | 0.916666667 |
| Tbc1d17  | Q8BYH7 | TBC1 domain family member 17 OS=Mus musculus OX=10090 GN=Tbc1d17 PE=1 SV=2                                                            | 0.96        |
| Dpm1     | O70152 | Dolichol-phosphate mannosyltransferase subunit 1 OS=Mus musculus OX=10090 GN=Dpm1 PE=1 SV=1                                           | 0.83        |
| Trmt6    | Q8CE96 | tRNA (adenine(58)-N(1))-methyltransferase non-catalytic subunit TRM6 OS=Mus musculus OX=10090 GN=Trmt6 PE=1 SV=1                      | 1.35        |
| Vps25    | Q9CQ80 | Vacuolar protein-sorting-associated protein 25 OS=Mus musculus OX=10090 GN=Vps25 PE=1 SV=1                                            | 0.99        |
| Dhrs1    | Q99L04 | Dehydrogenase/reductase SDR family member 1 OS=Mus musculus OX=10090 GN=Dhrs1 PE=1 SV=1                                               | 0.923333333 |
| Txnl4a   | P83877 | Thioredoxin-like protein 4A OS=Mus musculus OX=10090 GN=Txnl4a PE=1 SV=1                                                              | 0.813333333 |
| Sdad1    | Q80UZ2 | Protein SDA1 homolog OS=Mus musculus OX=10090 GN=Sdad1 PE=1 SV=1                                                                      | 0.81        |
| Fam207a  | P58468 | Protein FAM207A OS=Mus musculus OX=10090 GN=Fam207a PE=1 SV=1                                                                         | 0.83        |
| Slc25a17 | O70579 | Peroxisomal membrane protein PMP34 OS=Mus musculus OX=10090 GN=Slc25a17 PE=1 SV=1                                                     | 0.936666667 |
| Ctu2     | Q3U308 | Cytoplasmic tRNA 2-thiolation protein 2 OS=Mus musculus OX=10090 GN=Ctu2 PE=1 SV=1                                                    | 1.11        |
| Lclat1   | Q3UN02 | Lysocardiolipin acyltransferase 1 OS=Mus musculus OX=10090 GN=Lclat1 PE=1 SV=2                                                        | 0.786666667 |
| Mrps15   | Q9DC71 | 28S ribosomal protein S15 mitochondrial OS=Mus musculus OX=10090 GN=Mrps15 PE=1 SV=2                                                  | 0.88        |
| Vrk2     | Q8BN21 | Serine/threonine-protein kinase VRK2 OS=Mus musculus OX=10090 GN=Vrk2 PE=1 SV=2                                                       | 0.783333333 |
| Eno2     | P17183 | Gamma-enolase OS=Mus musculus OX=10090 GN=Eno2 PE=1 SV=2                                                                              |             |
| Eif5a2   | Q8BGY2 | Eukaryotic translation initiation factor 5A-2 OS=Mus musculus OX=10090 GN=Eif5a2 PE=1 SV=3                                            |             |
| Ctnna2   | Q61301 | Catenin alpha-2 OS=Mus musculus OX=10090 GN=Ctnna2 PE=1 SV=3                                                                          | 0.875       |
| H1-3     | P43277 | Histone H1.3 OS=Mus musculus OX=10090 GN=H1-3 PE=1 SV=2                                                                               | 0.753333333 |
| Prkcb    | P68404 | Protein kinase C beta type OS=Mus musculus OX=10090 GN=Prkcb PE=1 SV=4                                                                | 0.836666667 |
| Hras     | Q61411 | GTPase HRas OS=Mus musculus OX=10090 GN=Hras PE=1 SV=2                                                                                |             |
| Crebbp   | P45481 | Histone lysine acetyltransferase CREBBP OS=Mus musculus OX=10090 GN=Crebbp PE=1 SV=3                                                  | 1.315       |
| Arl8b    | Q9CQW2 | ADP-ribosylation factor-like protein 8B OS=Mus musculus OX=10090 GN=Arl8b PE=1 SV=1                                                   | 1.043333333 |
| Rab2b    | P59279 | Ras-related protein Rab-2B OS=Mus musculus OX=10090 GN=Rab2b PE=1 SV=1                                                                | 1.246666667 |
| Rab8a    | P55258 | Ras-related protein Rab-8A OS=Mus musculus OX=10090 GN=Rab8a PE=1 SV=2                                                                | 0.846666667 |
| Eif1     | P48024 | Eukaryotic translation initiation factor 1 OS=Mus musculus OX=10090 GN=Eif1 PE=1 SV=2                                                 | 0.86        |
| Pcbp3    | P57722 | Poly(rC)-binding protein 3 OS=Mus musculus OX=10090 GN=Pcbp3 PE=1 SV=3                                                                | 0.566666667 |
| Prkacb   | P68181 | cAMP-dependent protein kinase catalytic subunit beta OS=Mus musculus OX=10090 GN=Prkacb PE=1 SV=1                                     | 0.706666667 |
| H1-4     | P43274 | Histone H1.4 OS=Mus musculus OX=10090 GN=H1-4 PE=1 SV=2                                                                               | 0.793333333 |

|          |        |                                                                                              |             |
|----------|--------|----------------------------------------------------------------------------------------------|-------------|
| Rad23a   | P54726 | UV excision repair protein RAD23 homolog A OS=Mus musculus OX=10090 GN=Rad23a PE=1 SV=2      | 0.866666667 |
| Rab5a    | Q9CQD1 | Ras-related protein Rab-5A OS=Mus musculus OX=10090 GN=Rab5a PE=1 SV=1                       | 0.856666667 |
| H2az1    | P0C0S6 | Histone H2A.Z OS=Mus musculus OX=10090 GN=H2az1 PE=1 SV=2                                    | 0.86        |
| H2afv    | Q3THW5 | Histone H2A.V OS=Mus musculus OX=10090 GN=H2az2 PE=1 SV=3                                    | 0.86        |
| Tial1    | P70318 | Nucleolysin TIAR OS=Mus musculus OX=10090 GN=Tial1 PE=1 SV=1                                 | 0.88        |
| Sec61a1  | P61620 | Protein transport protein Sec61 subunit alpha isoform 1 OS=Mus musculus OX=10090 GN=Sec61a1  | 0.83        |
| Mcts1    | Q9DB27 | Malignant T-cell-amplified sequence 1 OS=Mus musculus OX=10090 GN=Mcts1 PE=1 SV=1            | 0.883333333 |
| Kif2c    | Q922S8 | Kinesin-like protein KIF2C OS=Mus musculus OX=10090 GN=Kif2c PE=1 SV=1                       | 0.83        |
| Camk1d   | Q8BW96 | Calcium/calmodulin-dependent protein kinase type 1D OS=Mus musculus OX=10090 GN=Camk1d F     | 0.543333333 |
| Pip4k2b  | Q80XI4 | Phosphatidylinositol 5-phosphate 4-kinase type-2 beta OS=Mus musculus OX=10090 GN=Pip4k2b F  | 0.883333333 |
| Snx12    | O70493 | Sorting nexin-12 OS=Mus musculus OX=10090 GN=Snx12 PE=1 SV=1                                 | 0.873333333 |
| Map4k4   | P97820 | Mitogen-activated protein kinase kinase kinase 4 OS=Mus musculus OX=10090 GN=Map4k4 F        | 0.976666667 |
| Eef1b    | O70251 | Elongation factor 1-beta OS=Mus musculus OX=10090 GN=Eef1b PE=1 SV=5                         | 0.89        |
| Capns1   | O88456 | Calpain small subunit 1 OS=Mus musculus OX=10090 GN=Capns1 PE=1 SV=1                         | 0.883333333 |
| Cdk2     | P97377 | Cyclin-dependent kinase 2 OS=Mus musculus OX=10090 GN=Cdk2 PE=1 SV=2                         | 0.876666667 |
| Rnf2     | Q9CQJ4 | E3 ubiquitin-protein ligase RING2 OS=Mus musculus OX=10090 GN=Rnf2 PE=1 SV=1                 | 0.893333333 |
| Ranbp10  | Q6VN19 | Ran-binding protein 10 OS=Mus musculus OX=10090 GN=Ranbp10 PE=1 SV=2                         | 0.8         |
| Rnf40    | Q3U319 | E3 ubiquitin-protein ligase BRE1B OS=Mus musculus OX=10090 GN=Rnf40 PE=1 SV=2                | 0.81        |
| Vps4a    | Q8VEJ9 | Vacuolar protein sorting-associated protein 4A OS=Mus musculus OX=10090 GN=Vps4a PE=1 SV=1   | 0.956666667 |
| Ptgs1    | P22437 | Prostaglandin G/H synthase 1 OS=Mus musculus OX=10090 GN=Ptgs1 PE=1 SV=1                     | 1.223333333 |
| Stk39    | Q9Z1W9 | STE20/SPS1-related proline-alanine-rich protein kinase OS=Mus musculus OX=10090 GN=Stk39 PE= | 0.893333333 |
| Elmo1    | Q8BPU7 | Engulfment and cell motility protein 1 OS=Mus musculus OX=10090 GN=Elmo1 PE=1 SV=2           | 0.743333333 |
| Hmgb3    | O54879 | High mobility group protein B3 OS=Mus musculus OX=10090 GN=Hmgb3 PE=1 SV=3                   | 0.85        |
| Ube2l3   | P68037 | Ubiquitin-conjugating enzyme E2 L3 OS=Mus musculus OX=10090 GN=Ube2l3 PE=1 SV=1              | 0.836666667 |
| Fen1     | P39749 | Flap endonuclease 1 OS=Mus musculus OX=10090 GN=Fen1 PE=1 SV=1                               | 0.87        |
| Ppm1f    | Q8CGA0 | Protein phosphatase 1F OS=Mus musculus OX=10090 GN=Ppm1f PE=1 SV=1                           | 0.93        |
| Tra2b    | P62996 | Transformer-2 protein homolog beta OS=Mus musculus OX=10090 GN=Tra2b PE=1 SV=1               | 0.836666667 |
| Ppp2r5c  | Q60996 | Serine/threonine-protein phosphatase 2A 56 kDa regulatory subunit gamma isoform OS=Mus musci | 0.86        |
| Cdk6     | Q64261 | Cyclin-dependent kinase 6 OS=Mus musculus OX=10090 GN=Cdk6 PE=1 SV=2                         | 0.696666667 |
| Minpp1   | Q9Z2L6 | Multiple inositol polyphosphate phosphatase 1 OS=Mus musculus OX=10090 GN=Minpp1 PE=1 SV=    | 0.956666667 |
| Rhog     | P84096 | Rho-related GTP-binding protein Rhog OS=Mus musculus OX=10090 GN=Rhog PE=1 SV=1              | 0.883333333 |
| Epm2aip1 | Q8VEH5 | EPM2A-interacting protein 1 OS=Mus musculus OX=10090 GN=Epm2aip1 PE=1 SV=1                   | 0.886666667 |
| Twf2     | Q9Z0P5 | Twinfilin-2 OS=Mus musculus OX=10090 GN=Twf2 PE=1 SV=1                                       | 0.93        |
| Cmpk1    | Q9DBP5 | UMP-CMP kinase OS=Mus musculus OX=10090 GN=Cmpk1 PE=1 SV=1                                   | 0.973333333 |

|          |        |                                                                                                         |             |
|----------|--------|---------------------------------------------------------------------------------------------------------|-------------|
| Cdk5     | P49615 | Cyclin-dependent-like kinase 5 OS=Mus musculus OX=10090 GN=Cdk5 PE=1 SV=1                               | 0.94        |
| Fads1    | Q920L1 | Acyl-CoA (8-3)-desaturase OS=Mus musculus OX=10090 GN=Fads1 PE=1 SV=1                                   | 0.913333333 |
| Gga2     | Q6P5E6 | ADP-ribosylation factor-binding protein GGA2 OS=Mus musculus OX=10090 GN=Gga2 PE=1 SV=1                 | 1.043333333 |
| Pgrmc1   | O55022 | Membrane-associated progesterone receptor component 1 OS=Mus musculus OX=10090 GN=Pgrmc1                | 0.87        |
| Cpne2    | P59108 | Copine-2 OS=Mus musculus OX=10090 GN=Cpne2 PE=1 SV=1                                                    | 0.866666667 |
| Rab34    | Q64008 | Ras-related protein Rab-34 OS=Mus musculus OX=10090 GN=Rab34 PE=1 SV=2                                  | 0.91        |
| Mtmr2    | Q9Z2D1 | Myotubularin-related protein 2 OS=Mus musculus OX=10090 GN=Mtmr2 PE=1 SV=3                              | 0.76        |
| Gga1     | Q8R0H9 | ADP-ribosylation factor-binding protein GGA1 OS=Mus musculus OX=10090 GN=Gga1 PE=1 SV=1                 | 0.873333333 |
| Gsk3a    | Q2NL51 | Glycogen synthase kinase-3 alpha OS=Mus musculus OX=10090 GN=Gsk3a PE=1 SV=2                            | 0.863333333 |
| Spata5   | Q3UMC0 | ATPase family protein 2 homolog OS=Mus musculus OX=10090 GN=Spata5 PE=1 SV=2                            | 0.84        |
| Htra2    | Q9JIY5 | Serine protease HTRA2 mitochondrial OS=Mus musculus OX=10090 GN=Htra2 PE=1 SV=2                         | 0.91        |
| Stxbp3   | Q60770 | Syntaxin-binding protein 3 OS=Mus musculus OX=10090 GN=Stxbp3 PE=1 SV=1                                 | 0.926666667 |
| Aurkb    | O70126 | Aurora kinase B OS=Mus musculus OX=10090 GN=Aurkb PE=1 SV=2                                             | 0.826666667 |
| Csrp1    | P97315 | Cysteine and glycine-rich protein 1 OS=Mus musculus OX=10090 GN=Csrp1 PE=1 SV=3                         | 0.96        |
| Nutf2    | P61971 | Nuclear transport factor 2 OS=Mus musculus OX=10090 GN=Nutf2 PE=1 SV=1                                  | 0.86        |
| Mtpn     | P62774 | Myotrophin OS=Mus musculus OX=10090 GN=Mtpn PE=1 SV=2                                                   | 0.893333333 |
| Hmox1    | P14901 | Heme oxygenase 1 OS=Mus musculus OX=10090 GN=Hmox1 PE=1 SV=1                                            | 0.933333333 |
| Alyref   | O08583 | THO complex subunit 4 OS=Mus musculus OX=10090 GN=Alyref PE=1 SV=3                                      | 0.89        |
| Eif3k    | Q9DBZ5 | Eukaryotic translation initiation factor 3 subunit K OS=Mus musculus OX=10090 GN=Eif3k PE=1 SV=         | 0.86        |
| Mtch2    | Q791V5 | Mitochondrial carrier homolog 2 OS=Mus musculus OX=10090 GN=Mtch2 PE=1 SV=1                             | 0.963333333 |
| Ctsl     | P06797 | Cathepsin L1 OS=Mus musculus OX=10090 GN=Ctsl PE=1 SV=2                                                 | 0.986666667 |
| Ehmt2    | Q9Z148 | Histone-lysine N-methyltransferase EHMT2 OS=Mus musculus OX=10090 GN=Ehmt2 PE=1 SV=2                    | 0.766666667 |
| Aimp2    | Q8R010 | Aminoacyl tRNA synthase complex-interacting multifunctional protein 2 OS=Mus musculus OX=10090 GN=Aimp2 | 0.893333333 |
| Rbm8a    | Q9CWZ3 | RNA-binding protein 8A OS=Mus musculus OX=10090 GN=Rbm8a PE=1 SV=4                                      | 0.91        |
| Pafah1b3 | Q61205 | Platelet-activating factor acetylhydrolase IB subunit gamma OS=Mus musculus OX=10090 GN=Pafah1b3        | 0.883333333 |
| Eif4h    | Q9WUK2 | Eukaryotic translation initiation factor 4H OS=Mus musculus OX=10090 GN=Eif4h PE=1 SV=3                 | 0.953333333 |
| Cdc37    | Q61081 | Hsp90 co-chaperone Cdc37 OS=Mus musculus OX=10090 GN=Cdc37 PE=1 SV=1                                    | 0.89        |
| Prrc1    | Q3UPH1 | Protein PRRC1 OS=Mus musculus OX=10090 GN=Prrc1 PE=1 SV=1                                               | 0.756666667 |
| Capg     | P24452 | Macrophage-capping protein OS=Mus musculus OX=10090 GN=Capg PE=1 SV=2                                   | 0.853333333 |
| Park7    | Q99LX0 | Parkinson disease protein 7 homolog OS=Mus musculus OX=10090 GN=Park7 PE=1 SV=1                         | 0.873333333 |
| Nup62    | Q63850 | Nuclear pore glycoprotein p62 OS=Mus musculus OX=10090 GN=Nup62 PE=1 SV=2                               | 0.836666667 |
| Mpi      | Q924M7 | Mannose-6-phosphate isomerase OS=Mus musculus OX=10090 GN=Mpi PE=1 SV=1                                 | 0.833333333 |
| Efemp1   | Q8BPB5 | EGF-containing fibulin-like extracellular matrix protein 1 OS=Mus musculus OX=10090 GN=Efemp1           | 0.846666667 |
| Notch2   | O35516 | Neurogenic locus notch homolog protein 2 OS=Mus musculus OX=10090 GN=Notch2 PE=1 SV=2                   | 0.76        |

|          |        |                                                                                                        |             |
|----------|--------|--------------------------------------------------------------------------------------------------------|-------------|
| Ftl1     | P29391 | Ferritin light chain 1 OS=Mus musculus OX=10090 GN=Ftl1 PE=1 SV=2                                      | 0.903333333 |
| Clptm1   | Q8VBZ3 | Cleft lip and palate transmembrane protein 1 homolog OS=Mus musculus OX=10090 GN=Clptm1 PE=1 SV=2      | 0.786666667 |
| Emg1     | O35130 | Ribosomal RNA small subunit methyltransferase NEP1 OS=Mus musculus OX=10090 GN=Emg1 PE=1 SV=2          | 0.826666667 |
| U2af1    | Q9D883 | Splicing factor U2AF 35 kDa subunit OS=Mus musculus OX=10090 GN=U2af1 PE=1 SV=4                        | 0.9         |
| Qdpr     | Q8BVI4 | Dihydropteridine reductase OS=Mus musculus OX=10090 GN=Qdpr PE=1 SV=2                                  | 0.88        |
| Sod2     | P09671 | Superoxide dismutase [Mn] mitochondrial OS=Mus musculus OX=10090 GN=Sod2 PE=1 SV=3                     | 0.903333333 |
| Sec22b   | O08547 | Vesicle-trafficking protein SEC22b OS=Mus musculus OX=10090 GN=Sec22b PE=1 SV=3                        | 0.88        |
| Dnttip2  | Q8R2M2 | Deoxynucleotidyltransferase terminal-interacting protein 2 OS=Mus musculus OX=10090 GN=Dntti           | 0.876666667 |
| Slc25a10 | Q9QZD8 | Mitochondrial dicarboxylate carrier OS=Mus musculus OX=10090 GN=Slc25a10 PE=1 SV=2                     | 0.813333333 |
| Cpsf6    | Q6NVF9 | Cleavage and polyadenylation specificity factor subunit 6 OS=Mus musculus OX=10090 GN=Cpsf6 PE=1 SV=1  | 0.81        |
| P3h1     | Q3V1T4 | Prolyl 3-hydroxylase 1 OS=Mus musculus OX=10090 GN=P3h1 PE=1 SV=2                                      | 0.826666667 |
| Dnajb11  | Q99KV1 | DnaJ homolog subfamily B member 11 OS=Mus musculus OX=10090 GN=Dnajb11 PE=1 SV=1                       | 0.903333333 |
| Emc2     | Q9CRD2 | ER membrane protein complex subunit 2 OS=Mus musculus OX=10090 GN=Emc2 PE=1 SV=1                       | 0.94        |
| Anp32e   | P97822 | Acidic leucine-rich nuclear phosphoprotein 32 family member E OS=Mus musculus OX=10090 GN=Anp32e       | 0.943333333 |
| Dcps     | Q9DAR7 | m7GpppX diphosphatase OS=Mus musculus OX=10090 GN=Dcps PE=1 SV=1                                       | 0.84        |
| Cops7a   | Q9CZ04 | COP9 signalosome complex subunit 7a OS=Mus musculus OX=10090 GN=Cops7a PE=1 SV=2                       | 0.88        |
| Ctsz     | Q9WUU7 | Cathepsin Z OS=Mus musculus OX=10090 GN=Ctsz PE=1 SV=1                                                 | 0.806666667 |
| Sh3bp1   | P55194 | SH3 domain-binding protein 1 OS=Mus musculus OX=10090 GN=Sh3bp1 PE=1 SV=3                              | 0.966666667 |
| Csrp2    | P97314 | Cysteine and glycine-rich protein 2 OS=Mus musculus OX=10090 GN=Csrp2 PE=1 SV=3                        | 0.91        |
| Ubxn4    | Q8VCH8 | UBX domain-containing protein 4 OS=Mus musculus OX=10090 GN=Ubxn4 PE=1 SV=1                            | 0.876666667 |
| Tbcc     | Q8VCN9 | Tubulin-specific chaperone C OS=Mus musculus OX=10090 GN=Tbcc PE=1 SV=1                                | 1.14        |
| Pcca     | Q91ZA3 | Propionyl-CoA carboxylase alpha chain mitochondrial OS=Mus musculus OX=10090 GN=Pcca PE=1 SV=1         | 0.836666667 |
| Pdcl3    | Q8BVF2 | Phosducin-like protein 3 OS=Mus musculus OX=10090 GN=Pdcl3 PE=1 SV=1                                   | 0.84        |
| Mrps30   | Q9D0G0 | 28S ribosomal protein S30 mitochondrial OS=Mus musculus OX=10090 GN=Mrps30 PE=1 SV=1                   | 0.65        |
| Ndufaf7  | Q9CWG8 | Protein arginine methyltransferase NDUFAF7 mitochondrial OS=Mus musculus OX=10090 GN=Ndufaf7           | 1.01        |
| Cstb     | Q62426 | Cystatin-B OS=Mus musculus OX=10090 GN=Cstb PE=1 SV=1                                                  | 0.86        |
| Tbca     | P48428 | Tubulin-specific chaperone A OS=Mus musculus OX=10090 GN=Tbca PE=1 SV=3                                | 0.926666667 |
| Ripk1    | Q60855 | Receptor-interacting serine/threonine-protein kinase 1 OS=Mus musculus OX=10090 GN=Ripk1 PE=1 SV=1     | 1.096666667 |
| Suclg1   | Q9WUM5 | Succinate--CoA ligase [ADP/GDP-forming] subunit alpha mitochondrial OS=Mus musculus OX=10090 GN=Suclg1 | 0.866666667 |
| Topbp1   | Q6ZQF0 | DNA topoisomerase 2-binding protein 1 OS=Mus musculus OX=10090 GN=Topbp1 PE=1 SV=2                     | 1.046666667 |
| Glpr2    | Q9CYL5 | Golgi-associated plant pathogenesis-related protein 1 OS=Mus musculus OX=10090 GN=Glpr2 PE=1 SV=1      | 0.89        |
| Septin5  | Q9Z2Q6 | Septin-5 OS=Mus musculus OX=10090 GN=Septin5 PE=1 SV=2                                                 | 0.89        |
| Plppb    | Q9Z2Y8 | Pyridoxal phosphate homeostasis protein OS=Mus musculus OX=10090 GN=Plppb PE=1 SV=1                    | 0.9         |
| Thumpd1  | Q99J36 | THUMP domain-containing protein 1 OS=Mus musculus OX=10090 GN=Thumpd1 PE=1 SV=1                        | 0.74        |



|           |        |                                                                                                    |             |
|-----------|--------|----------------------------------------------------------------------------------------------------|-------------|
| Pabpn1    | Q8CCS6 | Polyadenylate-binding protein 2 OS=Mus musculus OX=10090 GN=Pabpn1 PE=1 SV=3                       | 0.896666667 |
| Hibch     | Q8QZS1 | 3-hydroxyisobutyryl-CoA hydrolase mitochondrial OS=Mus musculus OX=10090 GN=Hibch PE=1 SV=1        | 0.91        |
| Preb      | Q9WUQ2 | Prolactin regulatory element-binding protein OS=Mus musculus OX=10090 GN=Preb PE=1 SV=1            | 0.82        |
| Thoc6     | Q5U4D9 | THO complex subunit 6 homolog OS=Mus musculus OX=10090 GN=Thoc6 PE=1 SV=1                          | 0.753333333 |
| Rragc     | Q99K70 | Ras-related GTP-binding protein C OS=Mus musculus OX=10090 GN=Rragc PE=1 SV=1                      | 0.863333333 |
| Ccdc102a  | Q3TMW1 | Coiled-coil domain-containing protein 102A OS=Mus musculus OX=10090 GN=Ccdc102a PE=1 SV=1          | 0.883333333 |
| Phf6      | Q9D4J7 | PHD finger protein 6 OS=Mus musculus OX=10090 GN=Phf6 PE=1 SV=1                                    | 0.856666667 |
| Elp4      | Q9ER73 | Elongator complex protein 4 OS=Mus musculus OX=10090 GN=Elp4 PE=1 SV=2                             | 0.873333333 |
| Dnajc9    | Q91WN1 | DnaJ homolog subfamily C member 9 OS=Mus musculus OX=10090 GN=Dnajc9 PE=1 SV=2                     | 0.796666667 |
| Txlna     | Q6PAM1 | Alpha-taxilin OS=Mus musculus OX=10090 GN=Txlna PE=1 SV=1                                          | 0.906666667 |
| Nufip2    | Q5F2E7 | Nuclear fragile X mental retardation-interacting protein 2 OS=Mus musculus OX=10090 GN=Nufip2      | 0.8         |
| Yars2     | Q8BYL4 | Tyrosine-tRNA ligase mitochondrial OS=Mus musculus OX=10090 GN=Yars2 PE=1 SV=2                     | 0.903333333 |
| Lgals3    | P16110 | Galectin-3 OS=Mus musculus OX=10090 GN=Lgals3 PE=1 SV=3                                            | 0.763333333 |
| Cryz      | P47199 | Quinone oxidoreductase OS=Mus musculus OX=10090 GN=Cryz PE=1 SV=1                                  | 0.88        |
| Mrps7     | Q80X85 | 28S ribosomal protein S7 mitochondrial OS=Mus musculus OX=10090 GN=Mrps7 PE=1 SV=1                 | 0.953333333 |
| Cnot2     | Q8C5L3 | CCR4-NOT transcription complex subunit 2 OS=Mus musculus OX=10090 GN=Cnot2 PE=1 SV=2               | 0.833333333 |
| Nit2      | Q9JHW2 | Omega-amidase NIT2 OS=Mus musculus OX=10090 GN=Nit2 PE=1 SV=1                                      | 0.81        |
| Pdcd4     | Q61823 | Programmed cell death protein 4 OS=Mus musculus OX=10090 GN=Pdcd4 PE=1 SV=1                        | 0.756666667 |
| Os9       | Q8K2C7 | Protein OS-9 OS=Mus musculus OX=10090 GN=Os9 PE=1 SV=2                                             | 0.81        |
| Ddx54     | Q8K4L0 | ATP-dependent RNA helicase DDX54 OS=Mus musculus OX=10090 GN=Ddx54 PE=1 SV=1                       | 0.9         |
| Prpf31    | Q8CCF0 | U4/U6 small nuclear ribonucleoprotein Prp31 OS=Mus musculus OX=10090 GN=Prpf31 PE=1 SV=3           | 0.866666667 |
| Snx17     | Q8BVL3 | Sorting nexin-17 OS=Mus musculus OX=10090 GN=Snx17 PE=1 SV=2                                       | 1.023333333 |
| Nop53     | Q8BK35 | Ribosome biogenesis protein NOP53 OS=Mus musculus OX=10090 GN=Nop53 PE=1 SV=1                      | 0.82        |
| Ostf1     | Q62422 | Osteoclast-stimulating factor 1 OS=Mus musculus OX=10090 GN=Ostf1 PE=1 SV=2                        | 0.866666667 |
| Snrpd2    | P62317 | Small nuclear ribonucleoprotein Sm D2 OS=Mus musculus OX=10090 GN=Snrpd2 PE=1 SV=1                 | 0.853333333 |
| Fyco1     | Q8VDC1 | FYVE and coiled-coil domain-containing protein 1 OS=Mus musculus OX=10090 GN=Fyco1 PE=1 SV=1       | 1.086666667 |
| Pnkp      | Q9JLV6 | Bifunctional polynucleotide phosphatase/kinase OS=Mus musculus OX=10090 GN=Pnkp PE=1 SV=2          | 0.966666667 |
| Maged1    | Q9QYH6 | Melanoma-associated antigen D1 OS=Mus musculus OX=10090 GN=Maged1 PE=1 SV=1                        | 0.85        |
| Nfu1      | Q9QZ23 | NFU1 iron-sulfur cluster scaffold homolog mitochondrial OS=Mus musculus OX=10090 GN=Nfu1 PE=1 SV=1 | 0.746666667 |
| Hpcal1    | P62748 | Hippocalcin-like protein 1 OS=Mus musculus OX=10090 GN=Hpcal1 PE=1 SV=2                            | 0.89        |
| Tcf25     | Q8R3L2 | Transcription factor 25 OS=Mus musculus OX=10090 GN=Tcf25 PE=1 SV=2                                | 0.82        |
| Nop9      | Q8BMC4 | Nucleolar protein 9 OS=Mus musculus OX=10090 GN=Nop9 PE=1 SV=1                                     | 1.083333333 |
| Mphosph10 | Q810V0 | U3 small nucleolar ribonucleoprotein protein MPP10 OS=Mus musculus OX=10090 GN=Mphosph10           | 0.826666667 |
| Hibadh    | Q99L13 | 3-hydroxyisobutyrate dehydrogenase mitochondrial OS=Mus musculus OX=10090 GN=Hibadh PE=1 SV=1      | 0.843333333 |

|          |        |                                                                                                                   |             |
|----------|--------|-------------------------------------------------------------------------------------------------------------------|-------------|
| Elob     | P62869 | Elongin-B OS=Mus musculus OX=10090 GN=Elob PE=1 SV=1                                                              | 0.886666667 |
| Gclm     | O09172 | Glutamate--cysteine ligase regulatory subunit OS=Mus musculus OX=10090 GN=Gclm PE=1 SV=1                          | 0.886666667 |
| Acot7    | Q91V12 | Cytosolic acyl coenzyme A thioester hydrolase OS=Mus musculus OX=10090 GN=Acot7 PE=1 SV=2                         | 0.886666667 |
| Wdr82    | Q8BFQ4 | WD repeat-containing protein 82 OS=Mus musculus OX=10090 GN=Wdr82 PE=1 SV=1                                       | 0.89        |
| Skp1     | Q9WTX5 | S-phase kinase-associated protein 1 OS=Mus musculus OX=10090 GN=Skp1 PE=1 SV=3                                    | 0.86        |
| Rab23    | P35288 | Ras-related protein Rab-23 OS=Mus musculus OX=10090 GN=Rab23 PE=1 SV=2                                            | 0.936666667 |
| Mesd     | Q9ERE7 | LRP chaperone MESD OS=Mus musculus OX=10090 GN=Mesd PE=1 SV=1                                                     | 0.92        |
| Cdc42ep1 | Q91W92 | Cdc42 effector protein 1 OS=Mus musculus OX=10090 GN=Cdc42ep1 PE=1 SV=1                                           | 0.743333333 |
| Exosc3   | Q7TQK4 | Exosome complex component RRP40 OS=Mus musculus OX=10090 GN=Exosc3 PE=1 SV=3                                      | 1.073333333 |
| Cog2     | Q921L5 | Conserved oligomeric Golgi complex subunit 2 OS=Mus musculus OX=10090 GN=Cog2 PE=1 SV=2                           | 0.693333333 |
| Bag2     | Q91YN9 | BAG family molecular chaperone regulator 2 OS=Mus musculus OX=10090 GN=Bag2 PE=1 SV=1                             | 0.903333333 |
| Bsg      | P18572 | Basigin OS=Mus musculus OX=10090 GN=Bsg PE=1 SV=2                                                                 | 0.826666667 |
| Dimt1    | Q9D0D4 | Probable dimethyladenosine transferase OS=Mus musculus OX=10090 GN=Dimt1 PE=2 SV=1                                | 0.813333333 |
| Rpap1    | Q80TE0 | RNA polymerase II-associated protein 1 OS=Mus musculus OX=10090 GN=Rpap1 PE=1 SV=2                                | 0.833333333 |
| Ints6    | Q6PCM2 | Integrator complex subunit 6 OS=Mus musculus OX=10090 GN=Ints6 PE=1 SV=1                                          | 0.92        |
| Hspb1    | P14602 | Heat shock protein beta-1 OS=Mus musculus OX=10090 GN=Hspb1 PE=1 SV=3                                             | 0.78        |
| Brox     | Q8K2Q7 | BRO1 domain-containing protein BROX OS=Mus musculus OX=10090 GN=Brox PE=1 SV=1                                    | 0.996666667 |
| Hp1bp3   | Q3TEA8 | Heterochromatin protein 1-binding protein 3 OS=Mus musculus OX=10090 GN=Hp1bp3 PE=1 SV=1                          | 0.86        |
| Jak1     | P52332 | Tyrosine-protein kinase JAK1 OS=Mus musculus OX=10090 GN=Jak1 PE=1 SV=1                                           | 0.8         |
| Soat1    | Q61263 | Sterol O-acyltransferase 1 OS=Mus musculus OX=10090 GN=Soat1 PE=1 SV=2                                            | 0.986666667 |
| Eif4e    | P63073 | Eukaryotic translation initiation factor 4E OS=Mus musculus OX=10090 GN=Eif4e PE=1 SV=1                           | 0.873333333 |
| Slc38a4  | Q8R1S9 | Sodium-coupled neutral amino acid transporter 4 OS=Mus musculus OX=10090 GN=Slc38a4 PE=1 SV=1                     | 0.916666667 |
| Arpc4    | P59999 | Actin-related protein 2/3 complex subunit 4 OS=Mus musculus OX=10090 GN=Arpc4 PE=1 SV=3                           | 0.913333333 |
| Phax     | Q9JJT9 | Phosphorylated adapter RNA export protein OS=Mus musculus OX=10090 GN=Phax PE=1 SV=1                              | 1.096666667 |
| Mkln1    | O89050 | Muskelin OS=Mus musculus OX=10090 GN=Mkln1 PE=1 SV=1                                                              | 0.88        |
| Timp3    | P39876 | Metalloproteinase inhibitor 3 OS=Mus musculus OX=10090 GN=Timp3 PE=1 SV=1                                         | 0.94        |
| Ndr3     | Q9QYF9 | Protein NDRG3 OS=Mus musculus OX=10090 GN=Ndr3 PE=1 SV=1                                                          | 0.913333333 |
| Etf1     | Q921G7 | Electron transfer flavoprotein-ubiquinone oxidoreductase mitochondrial OS=Mus musculus OX=10090 GN=Etf1 PE=1 SV=1 | 0.826666667 |
| Rps19    | Q9CZX8 | 40S ribosomal protein S19 OS=Mus musculus OX=10090 GN=Rps19 PE=1 SV=3                                             | 0.956666667 |
| Scp2     | P32020 | Non-specific lipid-transfer protein OS=Mus musculus OX=10090 GN=Scp2 PE=1 SV=3                                    | 1.046666667 |
| Cdc123   | Q8CII2 | Cell division cycle protein 123 homolog OS=Mus musculus OX=10090 GN=Cdc123 PE=1 SV=2                              | 0.893333333 |
| Eef1e1   | Q9D1M4 | Eukaryotic translation elongation factor 1 epsilon-1 OS=Mus musculus OX=10090 GN=Eef1e1 PE=1 SV=1                 | 0.973333333 |
| Zc3h4    | Q6ZPZ3 | Zinc finger CCCH domain-containing protein 4 OS=Mus musculus OX=10090 GN=Zc3h4 PE=1 SV=2                          | 0.8         |
| RragA    | Q80X95 | Ras-related GTP-binding protein A OS=Mus musculus OX=10090 GN=RragA PE=1 SV=1                                     | 0.856666667 |

|         |        |                                                                                                       |            |
|---------|--------|-------------------------------------------------------------------------------------------------------|------------|
|         | Q6PIU9 | Uncharacterized protein FLJ45252 homolog OS=Mus musculus OX=10090 PE=1 SV=2                           | 0.86       |
| Gtf2f2  | Q8R0A0 | General transcription factor IIF subunit 2 OS=Mus musculus OX=10090 GN=Gtf2f2 PE=1 SV=1               | 0.86666667 |
| Ncdn    | Q9Z0E0 | Neurochondrin OS=Mus musculus OX=10090 GN=Ncdn PE=1 SV=1                                              | 1.24       |
| Add3    | Q9QYB5 | Gamma-adducin OS=Mus musculus OX=10090 GN=Add3 PE=1 SV=2                                              | 0.8        |
| Cpsf7   | Q8BTV2 | Cleavage and polyadenylation specificity factor subunit 7 OS=Mus musculus OX=10090 GN=Cpsf7 PE=1 SV=1 | 1.02       |
| Mrps34  | Q9JIK9 | 28S ribosomal protein S34 mitochondrial OS=Mus musculus OX=10090 GN=Mrps34 PE=1 SV=1                  | 0.88666667 |
| Sri     | Q6P069 | Sorcin OS=Mus musculus OX=10090 GN=Sri PE=1 SV=1                                                      | 0.89666667 |
| Dnajc8  | Q6NZB0 | DnaJ homolog subfamily C member 8 OS=Mus musculus OX=10090 GN=Dnajc8 PE=1 SV=2                        | 0.93666667 |
| Ezh2    | Q61188 | Histone-lysine N-methyltransferase EZH2 OS=Mus musculus OX=10090 GN=Ezh2 PE=1 SV=2                    | 0.99666667 |
| Dennd10 | Q9D8N2 | DENN domain-containing protein 10 OS=Mus musculus OX=10090 GN=Dennd10 PE=1 SV=2                       | 0.87333333 |
| Abcd3   | P55096 | ATP-binding cassette sub-family D member 3 OS=Mus musculus OX=10090 GN=Abcd3 PE=1 SV=2                | 0.84333333 |
| Stat1   | P42225 | Signal transducer and activator of transcription 1 OS=Mus musculus OX=10090 GN=Stat1 PE=1 SV=1        | 0.82       |
| Dctn4   | Q8CBY8 | Dynactin subunit 4 OS=Mus musculus OX=10090 GN=Dctn4 PE=1 SV=1                                        | 0.80666667 |
| Plekho2 | Q8K124 | Pleckstrin homology domain-containing family O member 2 OS=Mus musculus OX=10090 GN=Plekho2 PE=1 SV=1 | 0.90666667 |
| Qtrt2   | B8ZXI1 | Queuine tRNA-ribosyltransferase accessory subunit 2 OS=Mus musculus OX=10090 GN=Qtrt2 PE=1 SV=1       | 0.73       |
| Rbm22   | Q8BHS3 | Pre-mRNA-splicing factor RBM22 OS=Mus musculus OX=10090 GN=Rbm22 PE=1 SV=1                            | 0.98333333 |
| Map7d1  | A2AJI0 | MAP7 domain-containing protein 1 OS=Mus musculus OX=10090 GN=Map7d1 PE=1 SV=1                         | 0.84666667 |
| Lancl1  | O89112 | Glutathione S-transferase LANCL1 OS=Mus musculus OX=10090 GN=Lancl1 PE=1 SV=1                         | 0.96       |
| Champ1  | Q8K327 | Chromosome alignment-maintaining phosphoprotein 1 OS=Mus musculus OX=10090 GN=Champ1 PE=1 SV=1        | 0.92666667 |
| Wipi2   | Q80W47 | WD repeat domain phosphoinositide-interacting protein 2 OS=Mus musculus OX=10090 GN=Wipi2 PE=1 SV=1   | 0.84333333 |
| Faf1    | P54731 | FAS-associated factor 1 OS=Mus musculus OX=10090 GN=Faf1 PE=1 SV=2                                    | 0.87666667 |
| Smpd4   | Q6ZPR5 | Sphingomyelin phosphodiesterase 4 OS=Mus musculus OX=10090 GN=Smpd4 PE=1 SV=2                         | 1.08333333 |
| Znf622  | Q91VY9 | Zinc finger protein 622 OS=Mus musculus OX=10090 GN=Znf622 PE=1 SV=1                                  | 1.03333333 |
| Ptpn2   | Q06180 | Tyrosine-protein phosphatase non-receptor type 2 OS=Mus musculus OX=10090 GN=Ptpn2 PE=1 SV=1          | 0.88666667 |
| Ash2l   | Q91X20 | Set1/Ash2 histone methyltransferase complex subunit ASH2 OS=Mus musculus OX=10090 GN=Ash2l PE=1 SV=1  | 1.02666667 |
| Dhodh   | O35435 | Dihydroorotate dehydrogenase (quinone) mitochondrial OS=Mus musculus OX=10090 GN=Dhodh PE=1 SV=1      | 0.97333333 |
| Pde12   | Q3TIU4 | 2' 5'-phosphodiesterase 12 OS=Mus musculus OX=10090 GN=Pde12 PE=1 SV=2                                | 0.75333333 |
| Tmem33  | Q9CR67 | Transmembrane protein 33 OS=Mus musculus OX=10090 GN=Tmem33 PE=1 SV=1                                 | 0.90333333 |
| Trmt10c | Q3UFY8 | tRNA methyltransferase 10 homolog C OS=Mus musculus OX=10090 GN=Trmt10c PE=1 SV=2                     | 0.95       |
| Bles03  | Q8VD62 | UPF0696 protein C11orf68 homolog OS=Mus musculus OX=10090 GN=Bles03 PE=1 SV=2                         | 0.90333333 |
| Ncstn   | P57716 | Nicastrin OS=Mus musculus OX=10090 GN=Ncstn PE=1 SV=3                                                 | 1.02       |
| Bcar1   | Q61140 | Breast cancer anti-estrogen resistance protein 1 OS=Mus musculus OX=10090 GN=Bcar1 PE=1 SV=2          | 0.98333333 |
| Myadm   | O35682 | Myeloid-associated differentiation marker OS=Mus musculus OX=10090 GN=Myadm PE=1 SV=2                 | 0.94666667 |
| Ptpn12  | P35831 | Tyrosine-protein phosphatase non-receptor type 12 OS=Mus musculus OX=10090 GN=Ptpn12 PE=1 SV=1        | 0.96666667 |

|          |        |                                                                                                    |             |
|----------|--------|----------------------------------------------------------------------------------------------------|-------------|
| Trim56   | Q80VI1 | E3 ubiquitin-protein ligase TRIM56 OS=Mus musculus OX=10090 GN=Trim56 PE=1 SV=1                    | 0.713333333 |
| Ado      | Q6PDY2 | 2-aminoethanethiol dioxygenase OS=Mus musculus OX=10090 GN=Ado PE=1 SV=2                           | 0.89        |
| Arpc3    | Q9JM76 | Actin-related protein 2/3 complex subunit 3 OS=Mus musculus OX=10090 GN=Arpc3 PE=1 SV=3            | 0.896666667 |
| Exoc3    | Q6KAR6 | Exocyst complex component 3 OS=Mus musculus OX=10090 GN=Exoc3 PE=1 SV=2                            | 1.01        |
| Arhgef7  | Q9ES28 | Rho guanine nucleotide exchange factor 7 OS=Mus musculus OX=10090 GN=Arhgef7 PE=1 SV=2             | 0.893333333 |
| Nck1     | Q99M51 | Cytoplasmic protein NCK1 OS=Mus musculus OX=10090 GN=Nck1 PE=1 SV=1                                | 0.823333333 |
| Nelfb    | Q8C4Y3 | Negative elongation factor B OS=Mus musculus OX=10090 GN=Nelfb PE=1 SV=2                           | 0.92        |
| Pgam5    | Q8BX10 | Serine/threonine-protein phosphatase PGAM5 mitochondrial OS=Mus musculus OX=10090 GN=Pg            | 0.816666667 |
| Ivns1abp | Q920Q8 | Influenza virus NS1A-binding protein homolog OS=Mus musculus OX=10090 GN=Ivns1abp PE=1 SV=         | 1.126666667 |
| Ufl1     | Q8CCJ3 | E3 UFM1-protein ligase 1 OS=Mus musculus OX=10090 GN=Ufl1 PE=1 SV=2                                | 0.906666667 |
| Stat5b   | P42232 | Signal transducer and activator of transcription 5B OS=Mus musculus OX=10090 GN=Stat5b PE=1 SV=    | 1.1         |
| Specc1   | Q5SXY1 | Cytospin-B OS=Mus musculus OX=10090 GN=Specc1 PE=1 SV=2                                            | 0.853333333 |
| Ptpn9    | O35239 | Tyrosine-protein phosphatase non-receptor type 9 OS=Mus musculus OX=10090 GN=Ptpn9 PE=1 SV=        | 0.876666667 |
| Mrpl13   | Q9D1P0 | 39S ribosomal protein L13 mitochondrial OS=Mus musculus OX=10090 GN=Mrpl13 PE=1 SV=1               | 1.096666667 |
| Ikbkb    | O88351 | Inhibitor of nuclear factor kappa-B kinase subunit beta OS=Mus musculus OX=10090 GN=Ikbkb PE=1 SV= | 1.106666667 |
| Zc2hc1a  | Q8BJH1 | Zinc finger C2HC domain-containing protein 1A OS=Mus musculus OX=10090 GN=Zc2hc1a PE=1 SV=         | 0.873333333 |
| Pi4k2a   | Q2TBE6 | Phosphatidylinositol 4-kinase type 2-alpha OS=Mus musculus OX=10090 GN=Pi4k2a PE=1 SV=1            | 1.016666667 |
| Mrps5    | Q99N87 | 28S ribosomal protein S5 mitochondrial OS=Mus musculus OX=10090 GN=Mrps5 PE=1 SV=1                 | 0.776666667 |
| Bud31    | Q6PGH1 | Protein BUD31 homolog OS=Mus musculus OX=10090 GN=Bud31 PE=1 SV=2                                  | 0.893333333 |
| Orc4     | O88708 | Origin recognition complex subunit 4 OS=Mus musculus OX=10090 GN=Orc4 PE=1 SV=2                    | 0.693333333 |
| Frg1     | P97376 | Protein FRG1 OS=Mus musculus OX=10090 GN=Frg1 PE=1 SV=2                                            | 0.96        |
| Med16    | Q6PGF3 | Mediator of RNA polymerase II transcription subunit 16 OS=Mus musculus OX=10090 GN=Med16 PE=       | 0.996666667 |
| Arhgap18 | Q8K0Q5 | Rho GTPase-activating protein 18 OS=Mus musculus OX=10090 GN=Arhgap18 PE=1 SV=1                    | 0.746666667 |
| Serpinc1 | P32261 | Antithrombin-III OS=Mus musculus OX=10090 GN=Serpinc1 PE=1 SV=1                                    | 0.093333333 |
| Uba52    | P62984 | Ubiquitin-60S ribosomal protein L40 OS=Mus musculus OX=10090 GN=Uba52 PE=1 SV=2                    | 0.783333333 |
| Atp2b4   | Q6Q477 | Plasma membrane calcium-transporting ATPase 4 OS=Mus musculus OX=10090 GN=Atp2b4 PE=1 SV=          | 0.756666667 |
| Nras     | P08556 | GTPase NRas OS=Mus musculus OX=10090 GN=Nras PE=1 SV=1                                             | 1.103333333 |
| H1-2     | P15864 | Histone H1.2 OS=Mus musculus OX=10090 GN=H1-2 PE=1 SV=2                                            | 0.806666667 |
| Naa16    | Q9DBB4 | N-alpha-acetyltransferase 16 NatA auxiliary subunit OS=Mus musculus OX=10090 GN=Naa16 PE=2 SV=     | 0.913333333 |
| Anp32b   | Q9EST5 | Acidic leucine-rich nuclear phosphoprotein 32 family member B OS=Mus musculus OX=10090 GN=         | 0.853333333 |
| Smad2    | Q62432 | Mothers against decapentaplegic homolog 2 OS=Mus musculus OX=10090 GN=Smad2 PE=1 SV=2              | 0.62        |
| Yes1     | Q04736 | Tyrosine-protein kinase Yes OS=Mus musculus OX=10090 GN=Yes1 PE=1 SV=3                             | 0.933333333 |
| Rab5c    | P35278 | Ras-related protein Rab-5C OS=Mus musculus OX=10090 GN=Rab5c PE=1 SV=2                             | 0.883333333 |
| Mta3     | Q924K8 | Metastasis-associated protein MTA3 OS=Mus musculus OX=10090 GN=Mta3 PE=1 SV=1                      | 0.956666667 |

|          |        |                                                                                                                         |             |
|----------|--------|-------------------------------------------------------------------------------------------------------------------------|-------------|
| Stk38    | Q91VJ4 | Serine/threonine-protein kinase 38 OS=Mus musculus OX=10090 GN=Stk38 PE=1 SV=1                                          | 0.776666667 |
| Prkar2a  | P12367 | cAMP-dependent protein kinase type II-alpha regulatory subunit OS=Mus musculus OX=10090 GN=Prkar2a PE=1 SV=1            | 0.833333333 |
| Sar1a    | P36536 | GTP-binding protein SAR1a OS=Mus musculus OX=10090 GN=Sar1a PE=1 SV=1                                                   | 0.993333333 |
| Gna11    | P21278 | Guanine nucleotide-binding protein subunit alpha-11 OS=Mus musculus OX=10090 GN=Gna11 PE=1 SV=1                         | 0.896666667 |
| Nfix     | P70257 | Nuclear factor 1 X-type OS=Mus musculus OX=10090 GN=Nfix PE=1 SV=2                                                      | 0.763333333 |
| Sar1b    | Q9CQC9 | GTP-binding protein SAR1b OS=Mus musculus OX=10090 GN=Sar1b PE=1 SV=1                                                   | 0.85        |
| Galnt1   | O08912 | Polypeptide N-acetylgalactosaminyltransferase 1 OS=Mus musculus OX=10090 GN=Galnt1 PE=1 SV=1                            | 0.773333333 |
| Abi1     | Q8CBW3 | Abl interactor 1 OS=Mus musculus OX=10090 GN=Abi1 PE=1 SV=3                                                             | 0.863333333 |
| Tor1aip1 | Q921T2 | Torsin-1A-interacting protein 1 OS=Mus musculus OX=10090 GN=Tor1aip1 PE=1 SV=3                                          | 0.81        |
| Khdrbs1  | Q60749 | KH domain-containing RNA-binding signal transduction-associated protein 1 OS=Mus musculus OX=10090 GN=Khdrbs1 PE=1 SV=1 | 0.846666667 |
| Dpf2     | Q61103 | Zinc finger protein ubi-d4 OS=Mus musculus OX=10090 GN=Dpf2 PE=1 SV=1                                                   | 0.993333333 |
| Prpsap2  | Q8R574 | Phosphoribosyl pyrophosphate synthase-associated protein 2 OS=Mus musculus OX=10090 GN=Prpsap2 PE=1 SV=1                | 0.906666667 |
| Zfp36l2  | P23949 | mRNA decay activator protein ZFP36L2 OS=Mus musculus OX=10090 GN=Zfp36l2 PE=1 SV=2                                      | 0.883333333 |
| Nfic     | P70255 | Nuclear factor 1 C-type OS=Mus musculus OX=10090 GN=Nfic PE=1 SV=1                                                      | 0.906666667 |
| Tmed9    | Q99KF1 | Transmembrane emp24 domain-containing protein 9 OS=Mus musculus OX=10090 GN=Tmed9 PE=1 SV=1                             | 0.813333333 |
| Stam2    | O88811 | Signal transducing adapter molecule 2 OS=Mus musculus OX=10090 GN=Stam2 PE=1 SV=1                                       | 0.796666667 |
| H1-1     | P43275 | Histone H1.1 OS=Mus musculus OX=10090 GN=H1-1 PE=1 SV=2                                                                 | 0.796666667 |
| Vapa     | Q9WV55 | Vesicle-associated membrane protein-associated protein A OS=Mus musculus OX=10090 GN=Vapa PE=1 SV=1                     | 0.76        |
| Gorasp2  | Q99JX3 | Golgi reassembly-stacking protein 2 OS=Mus musculus OX=10090 GN=Gorasp2 PE=1 SV=3                                       | 0.91        |
| Hsd17b12 | O70503 | Very-long-chain 3-oxoacyl-CoA reductase OS=Mus musculus OX=10090 GN=Hsd17b12 PE=1 SV=1                                  | 0.783333333 |
| Aprt     | P08030 | Adenine phosphoribosyltransferase OS=Mus musculus OX=10090 GN=Aprt PE=1 SV=2                                            | 0.963333333 |
| Epn2     | Q8CHU3 | Epsin-2 OS=Mus musculus OX=10090 GN=Epn2 PE=1 SV=1                                                                      | 0.74        |
| Crkl     | P47941 | Crk-like protein OS=Mus musculus OX=10090 GN=Crkl PE=1 SV=2                                                             | 0.816666667 |
| Parva    | Q9EPC1 | Alpha-parvin OS=Mus musculus OX=10090 GN=Parva PE=1 SV=1                                                                | 0.93        |
| Tnrc6b   | Q8BK12 | Trinucleotide repeat-containing gene 6B protein OS=Mus musculus OX=10090 GN=Tnrc6b PE=1 SV=1                            | 1.053333333 |
| Gsk3b    | Q9WV60 | Glycogen synthase kinase-3 beta OS=Mus musculus OX=10090 GN=Gsk3b PE=1 SV=2                                             | 0.91        |
| Snrpa    | Q62189 | U1 small nuclear ribonucleoprotein A OS=Mus musculus OX=10090 GN=Snrpa PE=1 SV=3                                        | 0.863333333 |
| Vapb     | Q9QY76 | Vesicle-associated membrane protein-associated protein B OS=Mus musculus OX=10090 GN=Vapb PE=1 SV=1                     | 0.866666667 |
| Gstm5    | P48774 | Glutathione S-transferase Mu 5 OS=Mus musculus OX=10090 GN=Gstm5 PE=1 SV=1                                              | 0.896666667 |
| Bag5     | Q8CI32 | BAG family molecular chaperone regulator 5 OS=Mus musculus OX=10090 GN=Bag5 PE=1 SV=1                                   | 0.843333333 |
| Strn4    | P58404 | Striatin-4 OS=Mus musculus OX=10090 GN=Strn4 PE=1 SV=2                                                                  | 0.843333333 |
| Irf2bp1  | Q8R3Y8 | Interferon regulatory factor 2-binding protein 1 OS=Mus musculus OX=10090 GN=Irf2bp1 PE=1 SV=1                          | 0.76        |
| Hars2    | Q99KK9 | Histidine--tRNA ligase mitochondrial OS=Mus musculus OX=10090 GN=Hars2 PE=1 SV=1                                        | 0.883333333 |
| Iws1     | Q8C1D8 | Protein IWS1 homolog OS=Mus musculus OX=10090 GN=Iws1 PE=1 SV=1                                                         | 0.946666667 |



|         |        |                                                                                                         |             |
|---------|--------|---------------------------------------------------------------------------------------------------------|-------------|
| Rhot1   | Q8BG51 | Mitochondrial Rho GTPase 1 OS=Mus musculus OX=10090 GN=Rhot1 PE=1 SV=1                                  | 0.84        |
| Fabp5   | Q05816 | Fatty acid-binding protein 5 OS=Mus musculus OX=10090 GN=Fabp5 PE=1 SV=3                                | 0.93        |
| Fus     | P56959 | RNA-binding protein FUS OS=Mus musculus OX=10090 GN=Fus PE=1 SV=1                                       | 0.793333333 |
| Arfgap1 | Q9EPJ9 | ADP-ribosylation factor GTPase-activating protein 1 OS=Mus musculus OX=10090 GN=Arfgap1 PE=1 SV=1       | 0.856666667 |
| Rplp2   | P99027 | 60S acidic ribosomal protein P2 OS=Mus musculus OX=10090 GN=Rplp2 PE=1 SV=3                             | 0.903333333 |
| Eif6    | O55135 | Eukaryotic translation initiation factor 6 OS=Mus musculus OX=10090 GN=Eif6 PE=1 SV=2                   | 0.89        |
| Tpt1    | P63028 | Translationally-controlled tumor protein OS=Mus musculus OX=10090 GN=Tpt1 PE=1 SV=1                     | 0.906666667 |
| Atp5pd  | Q9DCX2 | ATP synthase subunit d mitochondrial OS=Mus musculus OX=10090 GN=Atp5pd PE=1 SV=3                       | 0.903333333 |
| Wdr61   | Q9ERF3 | WD repeat-containing protein 61 OS=Mus musculus OX=10090 GN=Wdr61 PE=1 SV=1                             | 0.843333333 |
| Psmal1  | Q9R1P4 | Proteasome subunit alpha type-1 OS=Mus musculus OX=10090 GN=Psmal1 PE=1 SV=1                            | 0.92        |
| Dazap1  | Q9JII5 | DAZ-associated protein 1 OS=Mus musculus OX=10090 GN=Dazap1 PE=1 SV=2                                   | 0.896666667 |
| Psmal4  | Q9R1P0 | Proteasome subunit alpha type-4 OS=Mus musculus OX=10090 GN=Psmal4 PE=1 SV=1                            | 0.96        |
| Csnk2b  | P67871 | Casein kinase II subunit beta OS=Mus musculus OX=10090 GN=Csnk2b PE=1 SV=1                              | 0.86        |
| Psmb7   | P70195 | Proteasome subunit beta type-7 OS=Mus musculus OX=10090 GN=Psmb7 PE=1 SV=1                              | 0.893333333 |
| Fkbp3   | Q62446 | Peptidyl-prolyl cis-trans isomerase FKBP3 OS=Mus musculus OX=10090 GN=Fkbp3 PE=1 SV=2                   | 0.876666667 |
| Adh5    | P28474 | Alcohol dehydrogenase class-3 OS=Mus musculus OX=10090 GN=Adh5 PE=1 SV=3                                | 0.82        |
| Rfc2    | Q9WUK4 | Replication factor C subunit 2 OS=Mus musculus OX=10090 GN=Rfc2 PE=1 SV=1                               | 0.763333333 |
| Prdx5   | P99029 | Peroxiredoxin-5 mitochondrial OS=Mus musculus OX=10090 GN=Prdx5 PE=1 SV=2                               | 0.856666667 |
| Rpl10   | Q6ZWW3 | 60S ribosomal protein L10 OS=Mus musculus OX=10090 GN=Rpl10 PE=1 SV=3                                   | 0.89        |
| Luc7l3  | Q5SUF2 | Luc7-like protein 3 OS=Mus musculus OX=10090 GN=Luc7l3 PE=1 SV=1                                        | 0.85        |
| Agfg1   | Q8K2K6 | Arf-GAP domain and FG repeat-containing protein 1 OS=Mus musculus OX=10090 GN=Agfg1 PE=1 SV=1           | 0.89        |
| Palm    | Q9Z0P4 | Paralemmin-1 OS=Mus musculus OX=10090 GN=Palm PE=1 SV=1                                                 | 0.8         |
| Wdr12   | Q9JJA4 | Ribosome biogenesis protein WDR12 OS=Mus musculus OX=10090 GN=Wdr12 PE=1 SV=1                           | 0.896666667 |
| Prkci   | Q62074 | Protein kinase C iota type OS=Mus musculus OX=10090 GN=Prkci PE=1 SV=3                                  | 0.8         |
| Psmb3   | Q9R1P1 | Proteasome subunit beta type-3 OS=Mus musculus OX=10090 GN=Psmb3 PE=1 SV=1                              | 0.88        |
| Vps29   | Q9QZ88 | Vacuolar protein sorting-associated protein 29 OS=Mus musculus OX=10090 GN=Vps29 PE=1 SV=1              | 0.906666667 |
| Golim4  | Q8BXA1 | Golgi integral membrane protein 4 OS=Mus musculus OX=10090 GN=Golim4 PE=1 SV=1                          | 0.746666667 |
| Cox5a   | P12787 | Cytochrome c oxidase subunit 5A mitochondrial OS=Mus musculus OX=10090 GN=Cox5a PE=1 SV=1               | 0.813333333 |
| Ltbp3   | Q61810 | Latent-transforming growth factor beta-binding protein 3 OS=Mus musculus OX=10090 GN=Ltbp3 PE=1 SV=1    | 1.083333333 |
| Mtco2   | P00405 | Cytochrome c oxidase subunit 2 OS=Mus musculus OX=10090 GN=Mtco2 PE=1 SV=1                              | 0.863333333 |
| Atp5f1d | Q9D3D9 | ATP synthase subunit delta mitochondrial OS=Mus musculus OX=10090 GN=Atp5f1d PE=1 SV=1                  | 0.883333333 |
| Naxd    | Q9CZ42 | ATP-dependent (S)-NAD(P)H-hydrate dehydratase OS=Mus musculus OX=10090 GN=Naxd PE=1 SV=1                | 0.836666667 |
| Crel2   | Q9CYA0 | Protein disulfide isomerase Crel2 OS=Mus musculus OX=10090 GN=Crel2 PE=1 SV=1                           | 0.916666667 |
| Pacsin3 | Q99JB8 | Protein kinase C and casein kinase II substrate protein 3 OS=Mus musculus OX=10090 GN=Pacsin3 PE=1 SV=1 | 0.846666667 |

|         |        |                                                                                                                          |             |
|---------|--------|--------------------------------------------------------------------------------------------------------------------------|-------------|
| Cstf1   | Q99LC2 | Cleavage stimulation factor subunit 1 OS=Mus musculus OX=10090 GN=Cstf1 PE=1 SV=1                                        | 0.87        |
| Urod    | P70697 | Uroporphyrinogen decarboxylase OS=Mus musculus OX=10090 GN=Urod PE=1 SV=2                                                | 0.84        |
| Nhlrc2  | Q8BZW8 | NHL repeat-containing protein 2 OS=Mus musculus OX=10090 GN=Nhlrc2 PE=1 SV=1                                             | 0.77        |
| Map2k4  | P47809 | Dual specificity mitogen-activated protein kinase kinase 4 OS=Mus musculus OX=10090 GN=Map2k4 PE=1 SV=1                  | 0.856666667 |
| Spcs2   | Q9CYN2 | Signal peptidase complex subunit 2 OS=Mus musculus OX=10090 GN=Spcs2 PE=1 SV=1                                           | 0.82        |
| Cnpy2   | Q9QXT0 | Protein canopy homolog 2 OS=Mus musculus OX=10090 GN=Cnpy2 PE=1 SV=1                                                     | 0.936666667 |
| Ube2i   | P63280 | SUMO-conjugating enzyme UBC9 OS=Mus musculus OX=10090 GN=Ube2i PE=1 SV=1                                                 | 0.806666667 |
| Rbfox2  | Q8BP71 | RNA binding protein fox-1 homolog 2 OS=Mus musculus OX=10090 GN=Rbfox2 PE=1 SV=2                                         | 0.843333333 |
| Nifk    | Q91VE6 | MKI67 FHA domain-interacting nucleolar phosphoprotein OS=Mus musculus OX=10090 GN=Nifk PE=1 SV=1                         | 0.816666667 |
| Bpnt1   | Q9Z0S1 | 3'(2') 5'-bisphosphate nucleotidase 1 OS=Mus musculus OX=10090 GN=Bpnt1 PE=1 SV=2                                        | 0.95        |
| Spart   | Q8R1X6 | Spartin OS=Mus musculus OX=10090 GN=Spart PE=1 SV=1                                                                      | 0.78        |
| Ehmt1   | Q5DW34 | Histone-lysine N-methyltransferase EHMT1 OS=Mus musculus OX=10090 GN=Ehmt1 PE=1 SV=2                                     | 0.886666667 |
| Acot2   | Q9QYR9 | Acyl-coenzyme A thioesterase 2 mitochondrial OS=Mus musculus OX=10090 GN=Acot2 PE=1 SV=2                                 | 0.893333333 |
| Psme3   | P61290 | Proteasome activator complex subunit 3 OS=Mus musculus OX=10090 GN=Psme3 PE=1 SV=1                                       | 0.91        |
| Vasp    | P70460 | Vasodilator-stimulated phosphoprotein OS=Mus musculus OX=10090 GN=Vasp PE=1 SV=4                                         | 0.92        |
| Cmtr1   | Q9DBC3 | Cap-specific mRNA (nucleoside-2'-O-)-methyltransferase 1 OS=Mus musculus OX=10090 GN=Cmtr1 PE=1 SV=1                     | 1.006666667 |
| RtcA    | Q9D7H3 | RNA 3'-terminal phosphate cyclase OS=Mus musculus OX=10090 GN=RtcA PE=1 SV=2                                             | 0.89        |
| Zcchc8  | Q9CYA6 | Zinc finger CCHC domain-containing protein 8 OS=Mus musculus OX=10090 GN=Zcchc8 PE=1 SV=3                                | 1.156666667 |
| Fip1l1  | Q9D824 | Pre-mRNA 3'-end-processing factor FIP1 OS=Mus musculus OX=10090 GN=Fip1l1 PE=1 SV=1                                      | 0.823333333 |
| Rps12   | P63323 | 40S ribosomal protein S12 OS=Mus musculus OX=10090 GN=Rps12 PE=1 SV=2                                                    | 0.906666667 |
| Ankrd28 | Q505D1 | Serine/threonine-protein phosphatase 6 regulatory ankyrin repeat subunit A OS=Mus musculus OX=10090 GN=Ankrd28 PE=1 SV=1 | 0.916666667 |
| Cask    | O70589 | Peripheral plasma membrane protein CASK OS=Mus musculus OX=10090 GN=Cask PE=1 SV=2                                       | 1.073333333 |
| Sf3a2   | Q62203 | Splicing factor 3A subunit 2 OS=Mus musculus OX=10090 GN=Sf3a2 PE=1 SV=2                                                 | 0.946666667 |
| Pgp     | Q8CHP8 | Glycerol-3-phosphate phosphatase OS=Mus musculus OX=10090 GN=Pgp PE=1 SV=1                                               | 0.863333333 |
| Rab11b  | P46638 | Ras-related protein Rab-11B OS=Mus musculus OX=10090 GN=Rab11b PE=1 SV=3                                                 | 0.903333333 |
| Psmg1   | Q9JK23 | Proteasome assembly chaperone 1 OS=Mus musculus OX=10090 GN=Psmg1 PE=1 SV=1                                              | 0.84        |
| Chmp4b  | Q9D8B3 | Charged multivesicular body protein 4b OS=Mus musculus OX=10090 GN=Chmp4b PE=1 SV=2                                      | 0.816666667 |
| Pogz    | Q8BZH4 | Pogo transposable element with ZNF domain OS=Mus musculus OX=10090 GN=Pogz PE=1 SV=2                                     | 0.993333333 |
| Sh3glb1 | Q9JK48 | Endophilin-B1 OS=Mus musculus OX=10090 GN=Sh3glb1 PE=1 SV=1                                                              | 0.86        |
| Bcat2   | O35855 | Branched-chain-amino-acid aminotransferase mitochondrial OS=Mus musculus OX=10090 GN=Bcat2 PE=1 SV=1                     | 1.11        |
| Ddt     | O35215 | D-dopachrome decarboxylase OS=Mus musculus OX=10090 GN=Ddt PE=1 SV=3                                                     | 0.883333333 |
| Saal1   | Q9D2C2 | Protein SAAL1 OS=Mus musculus OX=10090 GN=Saal1 PE=1 SV=1                                                                | 1.003333333 |
| Dohh    | Q99LN9 | Deoxyhypusine hydroxylase OS=Mus musculus OX=10090 GN=Dohh PE=1 SV=2                                                     | 0.9         |
| Ckb     | Q04447 | Creatine kinase B-type OS=Mus musculus OX=10090 GN=Ckb PE=1 SV=1                                                         | 0.836666667 |

|          |        |                                                                                                                                                  |             |
|----------|--------|--------------------------------------------------------------------------------------------------------------------------------------------------|-------------|
| Ctr9     | Q62018 | RNA polymerase-associated protein CTR9 homolog OS=Mus musculus OX=10090 GN=Ctr9 PE=1 SV=1                                                        | 0.81        |
| Polr1c   | P52432 | DNA-directed RNA polymerases I and III subunit RPAC1 OS=Mus musculus OX=10090 GN=Polr1c PE=1 SV=1                                                | 0.926666667 |
| Tm9sf4   | Q8BH24 | Transmembrane 9 superfamily member 4 OS=Mus musculus OX=10090 GN=Tm9sf4 PE=1 SV=1                                                                | 0.786666667 |
| Sms      | P97355 | Spermine synthase OS=Mus musculus OX=10090 GN=Sms PE=1 SV=1                                                                                      | 1.023333333 |
| Galk2    | Q68FH4 | N-acetylgalactosamine kinase OS=Mus musculus OX=10090 GN=Galk2 PE=1 SV=1                                                                         | 0.85        |
| Clpx     | Q9JHS4 | ATP-dependent Clp protease ATP-binding subunit clpX-like mitochondrial OS=Mus musculus OX=10090 GN=Clpx PE=1 SV=1                                | 0.766666667 |
| Csnk1a1  | Q8BK63 | Casein kinase I isoform alpha OS=Mus musculus OX=10090 GN=Csnk1a1 PE=1 SV=2                                                                      | 0.796666667 |
| Stat6    | P52633 | Signal transducer and transcription activator 6 OS=Mus musculus OX=10090 GN=Stat6 PE=1 SV=2                                                      | 0.953333333 |
| Uqcrcfs1 | Q9CR68 | Cytochrome b-c1 complex subunit Rieske mitochondrial OS=Mus musculus OX=10090 GN=Uqcrcfs1 PE=1 SV=1                                              | 0.9         |
| Naa50    | Q6PGB6 | N-alpha-acetyltransferase 50 OS=Mus musculus OX=10090 GN=Naa50 PE=1 SV=1                                                                         | 0.89        |
| Man2b1   | O09159 | Lysosomal alpha-mannosidase OS=Mus musculus OX=10090 GN=Man2b1 PE=1 SV=4                                                                         | 1.223333333 |
| Acy1     | Q99JW2 | Aminoacylase-1 OS=Mus musculus OX=10090 GN=Acy1 PE=1 SV=1                                                                                        | 1.143333333 |
| Dclk1    | Q9JLM8 | Serine/threonine-protein kinase DCLK1 OS=Mus musculus OX=10090 GN=Dclk1 PE=1 SV=1                                                                | 0.886666667 |
| Fbxo30   | Q8BJL1 | F-box only protein 30 OS=Mus musculus OX=10090 GN=Fbxo30 PE=1 SV=2                                                                               | 0.926666667 |
| Ndufa9   | Q9DC69 | NADH dehydrogenase [ubiquinone] 1 alpha subcomplex subunit 9 mitochondrial OS=Mus musculus OX=10090 GN=Ndufa9 PE=1 SV=1                          | 0.753333333 |
| Pdxk     | Q8K183 | Pyridoxal kinase OS=Mus musculus OX=10090 GN=Pdxk PE=1 SV=1                                                                                      | 0.836666667 |
| Sdhb     | Q9CQA3 | Succinate dehydrogenase [ubiquinone] iron-sulfur subunit mitochondrial OS=Mus musculus OX=10090 GN=Sdhb PE=1 SV=1                                | 0.98        |
| Eci1     | P42125 | Enoyl-CoA delta isomerase 1 mitochondrial OS=Mus musculus OX=10090 GN=Eci1 PE=1 SV=2                                                             | 0.873333333 |
| Mccc2    | Q3ULD5 | Methylcrotonoyl-CoA carboxylase beta chain mitochondrial OS=Mus musculus OX=10090 GN=Mccc2 PE=1 SV=1                                             | 0.92        |
| Grhpr    | Q91Z53 | Glyoxylate reductase/hydroxypyruvate reductase OS=Mus musculus OX=10090 GN=Grhpr PE=1 SV=1                                                       | 0.97        |
| Tiprl    | Q8BH58 | TIP41-like protein OS=Mus musculus OX=10090 GN=Tiprl PE=1 SV=1                                                                                   | 0.963333333 |
| Exoc2    | Q9D4H1 | Exocyst complex component 2 OS=Mus musculus OX=10090 GN=Exoc2 PE=1 SV=1                                                                          | 0.85        |
| Senp3    | Q9EP97 | Sentrin-specific protease 3 OS=Mus musculus OX=10090 GN=Senp3 PE=1 SV=1                                                                          | 1.093333333 |
| Pwp1     | Q99LL5 | Periodic tryptophan protein 1 homolog OS=Mus musculus OX=10090 GN=Pwp1 PE=1 SV=1                                                                 | 0.86        |
| Cpq      | Q9WVJ3 | Carboxypeptidase Q OS=Mus musculus OX=10090 GN=Cpq PE=1 SV=1                                                                                     | 0.926666667 |
| Tsn      | Q62348 | Translin OS=Mus musculus OX=10090 GN=Tsn PE=1 SV=1                                                                                               | 0.853333333 |
| Urb1     | Q571H0 | Nucleolar pre-ribosomal-associated protein 1 OS=Mus musculus OX=10090 GN=Urb1 PE=1 SV=2                                                          | 0.876666667 |
| Cd2ap    | Q9JLQ0 | CD2-associated protein OS=Mus musculus OX=10090 GN=Cd2ap PE=1 SV=3                                                                               | 0.88        |
| Smarcad1 | Q04692 | SWI/SNF-related matrix-associated actin-dependent regulator of chromatin subfamily A containing 1 OS=Mus musculus OX=10090 GN=Smarcad1 PE=1 SV=1 | 0.9         |
| Rpp30    | O88796 | Ribonuclease P protein subunit p30 OS=Mus musculus OX=10090 GN=Rpp30 PE=1 SV=1                                                                   | 0.843333333 |
| Pola2    | P33611 | DNA polymerase alpha subunit B OS=Mus musculus OX=10090 GN=Pola2 PE=1 SV=2                                                                       | 0.9         |
| Cep55    | Q8BT07 | Centrosomal protein of 55 kDa OS=Mus musculus OX=10090 GN=Cep55 PE=1 SV=2                                                                        | 0.903333333 |
| Tecr     | Q9CY27 | Very-long-chain enoyl-CoA reductase OS=Mus musculus OX=10090 GN=Tecr PE=1 SV=1                                                                   | 0.843333333 |
| Dcaf13   | Q6PAC3 | DDB1- and CUL4-associated factor 13 OS=Mus musculus OX=10090 GN=Dcaf13 PE=2 SV=2                                                                 | 0.88        |

|        |        |                                                                                                                            |  |
|--------|--------|----------------------------------------------------------------------------------------------------------------------------|--|
| Ascc2  | Q91WR3 | Activating signal cointegrator 1 complex subunit 2 OS=Mus musculus OX=10090 GN=Ascc2 PE=1 SV=0.85                          |  |
| Atp1b3 | P97370 | Sodium/potassium-transporting ATPase subunit beta-3 OS=Mus musculus OX=10090 GN=Atp1b3 PE=1 SV=1 0.836666667               |  |
| Ncapd3 | Q6ZQK0 | Condensin-2 complex subunit D3 OS=Mus musculus OX=10090 GN=Ncapd3 PE=1 SV=3 0.813333333                                    |  |
| Tanc1  | Q0VGY8 | Protein TANC1 OS=Mus musculus OX=10090 GN=Tanc1 PE=1 SV=2 0.93                                                             |  |
| Hpfl   | Q8CFE2 | Histone PARylation factor 1 OS=Mus musculus OX=10090 GN=Hpfl PE=1 SV=1 0.883333333                                         |  |
| Trmt1  | Q3TX08 | tRNA (guanine(26)-N(2))-dimethyltransferase OS=Mus musculus OX=10090 GN=Trmt1 PE=1 SV=2 0.803333333                        |  |
| Acadsb | Q9DBL1 | Short/branched chain specific acyl-CoA dehydrogenase mitochondrial OS=Mus musculus OX=10090 GN=Acadsb PE=1 SV=1 1.08       |  |
| Med14  | A2ABV5 | Mediator of RNA polymerase II transcription subunit 14 OS=Mus musculus OX=10090 GN=Med14 PE=1 SV=1 1.11                    |  |
| Rabep1 | O35551 | Rab GTPase-binding effector protein 1 OS=Mus musculus OX=10090 GN=Rabep1 PE=1 SV=2 0.833333333                             |  |
| Vps51  | Q3UVL4 | Vacuolar protein sorting-associated protein 51 homolog OS=Mus musculus OX=10090 GN=Vps51 PE=1 SV=1 0.733333333             |  |
| Impact | O55091 | Protein IMPACT OS=Mus musculus OX=10090 GN=Impact PE=1 SV=2 0.776666667                                                    |  |
| Ankh   | Q9JH22 | Progressive ankylosis protein OS=Mus musculus OX=10090 GN=Ankh PE=2 SV=1 0.876666667                                       |  |
| Sptlc2 | P97363 | Serine palmitoyltransferase 2 OS=Mus musculus OX=10090 GN=Sptlc2 PE=1 SV=2 0.916666667                                     |  |
| Snx27  | Q3UHD6 | Sorting nexin-27 OS=Mus musculus OX=10090 GN=Snx27 PE=1 SV=2 0.796666667                                                   |  |
| Polr1b | P70700 | DNA-directed RNA polymerase I subunit RPA2 OS=Mus musculus OX=10090 GN=Polr1b PE=1 SV=2 0.856666667                        |  |
| Cdc27  | A2A6Q5 | Cell division cycle protein 27 homolog OS=Mus musculus OX=10090 GN=Cdc27 PE=1 SV=1 0.896666667                             |  |
| Ufd1   | P70362 | Ubiquitin recognition factor in ER-associated degradation protein 1 OS=Mus musculus OX=10090 GN=Ufd1 PE=1 SV=1 0.933333333 |  |
| Pccb   | Q99MN9 | Propionyl-CoA carboxylase beta chain mitochondrial OS=Mus musculus OX=10090 GN=Pccb PE=1 SV=1 0.906666667                  |  |
| Mrto4  | Q9D0I8 | mRNA turnover protein 4 homolog OS=Mus musculus OX=10090 GN=Mrto4 PE=1 SV=1 0.893333333                                    |  |
| Pask   | Q8CEE6 | PAS domain-containing serine/threonine-protein kinase OS=Mus musculus OX=10090 GN=Pask PE=1 SV=1 1.36                      |  |
| Rpl32  | P62911 | 60S ribosomal protein L32 OS=Mus musculus OX=10090 GN=Rpl32 PE=1 SV=2 0.87                                                 |  |
| Abcf3  | Q8K268 | ATP-binding cassette sub-family F member 3 OS=Mus musculus OX=10090 GN=Abcf3 PE=1 SV=1 0.85                                |  |
| Anxa8  | O35640 | Annexin A8 OS=Mus musculus OX=10090 GN=Anxa8 PE=1 SV=2 0.83                                                                |  |
| Mvd    | Q99JF5 | Diphosphomevalonate decarboxylase OS=Mus musculus OX=10090 GN=Mvd PE=1 SV=2 0.936666667                                    |  |
| Actr10 | Q9QZB7 | Actin-related protein 10 OS=Mus musculus OX=10090 GN=Actr10 PE=1 SV=2 1.046666667                                          |  |
| Gtf2b  | P62915 | Transcription initiation factor IIB OS=Mus musculus OX=10090 GN=Gtf2b PE=1 SV=1 0.826666667                                |  |
| Psmd9  | Q9CR00 | 26S proteasome non-ATPase regulatory subunit 9 OS=Mus musculus OX=10090 GN=Psmd9 PE=1 SV=1 0.906666667                     |  |
| Enpp1  | P06802 | Ectonucleotide pyrophosphatase/phosphodiesterase family member 1 OS=Mus musculus OX=10090 GN=Enpp1 PE=1 SV=1 0.726666667   |  |
| Nt5dc3 | Q3UHB1 | 5'-nucleotidase domain-containing protein 3 OS=Mus musculus OX=10090 GN=Nt5dc3 PE=1 SV=1 0.883333333                       |  |
| Sbds   | P70122 | Ribosome maturation protein SBDS OS=Mus musculus OX=10090 GN=Sbds PE=1 SV=4 0.833333333                                    |  |
| Diaph2 | O70566 | Protein diaphanous homolog 2 OS=Mus musculus OX=10090 GN=Diaph2 PE=1 SV=2 0.79                                             |  |
| Mpst   | Q99J99 | 3-mercaptopyruvate sulfurtransferase OS=Mus musculus OX=10090 GN=Mpst PE=1 SV=4 0.85                                       |  |
| Aga    | Q64191 | N(4)-(beta-N-acetylglucosaminy)-L-asparaginase OS=Mus musculus OX=10090 GN=Aga PE=1 SV=1 0.886666667                       |  |
| Med24  | Q99K74 | Mediator of RNA polymerase II transcription subunit 24 OS=Mus musculus OX=10090 GN=Med24 PE=1 SV=1 0.923333333             |  |

|        |        |                                                                                                |             |
|--------|--------|------------------------------------------------------------------------------------------------|-------------|
| Plk1   | Q07832 | Serine/threonine-protein kinase PLK1 OS=Mus musculus OX=10090 GN=Plk1 PE=1 SV=2                | 0.91        |
| Ube2z  | Q3UE37 | Ubiquitin-conjugating enzyme E2 Z OS=Mus musculus OX=10090 GN=Ube2z PE=1 SV=2                  | 0.813333333 |
| Wrnip1 | Q91XU0 | ATPase WRNIP1 OS=Mus musculus OX=10090 GN=Wrnip1 PE=1 SV=2                                     | 0.976666667 |
| Pi4ka  | E9Q3L2 | Phosphatidylinositol 4-kinase alpha OS=Mus musculus OX=10090 GN=Pi4ka PE=1 SV=2                | 0.693333333 |
| Ints4  | Q8CIM8 | Integrator complex subunit 4 OS=Mus musculus OX=10090 GN=Ints4 PE=1 SV=1                       | 1.106666667 |
| Ccnb1  | P24860 | G2/mitotic-specific cyclin-B1 OS=Mus musculus OX=10090 GN=Ccnb1 PE=1 SV=3                      | 0.83        |
| Usp8   | Q80U87 | Ubiquitin carboxyl-terminal hydrolase 8 OS=Mus musculus OX=10090 GN=Usp8 PE=1 SV=2             | 0.866666667 |
| Rexo4  | Q6PAQ4 | RNA exonuclease 4 OS=Mus musculus OX=10090 GN=Rexo4 PE=2 SV=2                                  | 0.936666667 |
| Eed    | Q921E6 | Polycomb protein EED OS=Mus musculus OX=10090 GN=Eed PE=1 SV=1                                 | 0.803333333 |
| Ufsp2  | Q99K23 | Ufm1-specific protease 2 OS=Mus musculus OX=10090 GN=Ufsp2 PE=1 SV=1                           | 0.96        |
| Apaf1  | O88879 | Apoptotic protease-activating factor 1 OS=Mus musculus OX=10090 GN=Apaf1 PE=1 SV=3             | 0.956666667 |
| Acad8  | Q9D7B6 | Isobutyryl-CoA dehydrogenase mitochondrial OS=Mus musculus OX=10090 GN=Acad8 PE=1 SV=2         | 0.853333333 |
| Spats2 | Q8K1N4 | Spermatogenesis-associated serine-rich protein 2 OS=Mus musculus OX=10090 GN=Spats2 PE=1 SV=   | 0.84        |
| Ubxn7  | Q6P5G6 | UBX domain-containing protein 7 OS=Mus musculus OX=10090 GN=Ubxn7 PE=1 SV=2                    | 0.82        |
| Paip1  | Q8VE62 | Polyadenylate-binding protein-interacting protein 1 OS=Mus musculus OX=10090 GN=Paip1 PE=1 SV= | 0.9         |
| Nek9   | Q8K1R7 | Serine/threonine-protein kinase Nek9 OS=Mus musculus OX=10090 GN=Nek9 PE=1 SV=2                | 0.94        |
| Rsu1   | Q01730 | Ras suppressor protein 1 OS=Mus musculus OX=10090 GN=Rsu1 PE=1 SV=3                            | 0.9         |
| Hs1bp3 | Q3TC93 | HCLS1-binding protein 3 OS=Mus musculus OX=10090 GN=Hs1bp3 PE=1 SV=2                           | 0.953333333 |
| Mia2   | Q91ZV0 | Melanoma inhibitory activity protein 2 OS=Mus musculus OX=10090 GN=Mia2 PE=1 SV=3              | 1.09        |
| Rpl26  | P61255 | 60S ribosomal protein L26 OS=Mus musculus OX=10090 GN=Rpl26 PE=1 SV=1                          | 0.913333333 |
| Mrpl39 | Q9JKF7 | 39S ribosomal protein L39 mitochondrial OS=Mus musculus OX=10090 GN=Mrpl39 PE=1 SV=4           | 0.723333333 |
| Hexb   | P20060 | Beta-hexosaminidase subunit beta OS=Mus musculus OX=10090 GN=Hexb PE=1 SV=2                    | 0.863333333 |
| Wdr70  | Q3TWF6 | WD repeat-containing protein 70 OS=Mus musculus OX=10090 GN=Wdr70 PE=1 SV=1                    | 0.86        |
| Sorbs1 | Q62417 | Sorbin and SH3 domain-containing protein 1 OS=Mus musculus OX=10090 GN=Sorbs1 PE=1 SV=2        | 0.963333333 |
| Cpd    | O89001 | Carboxypeptidase D OS=Mus musculus OX=10090 GN=Cpd PE=1 SV=2                                   | 0.793333333 |
| Rhoa   | Q9QUI0 | Transforming protein RhoA OS=Mus musculus OX=10090 GN=Rhoa PE=1 SV=1                           | 0.9         |
| Rhoc   | Q62159 | Rho-related GTP-binding protein RhoC OS=Mus musculus OX=10090 GN=Rhoc PE=1 SV=2                | 0.84        |
| Pak3   | Q61036 | Serine/threonine-protein kinase PAK 3 OS=Mus musculus OX=10090 GN=Pak3 PE=1 SV=2               | 0.863333333 |
| H3c11  | P68433 | Histone H3.1 OS=Mus musculus OX=10090 GN=H3c1 PE=1 SV=2                                        | 0.86        |
| Arf4   | P61750 | ADP-ribosylation factor 4 OS=Mus musculus OX=10090 GN=Arf4 PE=1 SV=2                           | 0.863333333 |
| Ep300  | B2RWS6 | Histone acetyltransferase p300 OS=Mus musculus OX=10090 GN=Ep300 PE=1 SV=2                     | 0.82        |
| Rab1b  | Q9D1G1 | Ras-related protein Rab-1B OS=Mus musculus OX=10090 GN=Rab1b PE=1 SV=1                         | 0.85        |
| Ythdf1 | P59326 | YTH domain-containing family protein 1 OS=Mus musculus OX=10090 GN=Ythdf1 PE=1 SV=1            | 0.756666667 |
| Prps2  | Q9CS42 | Ribose-phosphate pyrophosphokinase 2 OS=Mus musculus OX=10090 GN=Prps2 PE=1 SV=4               | 0.846666667 |



|         |        |                                                                                              |             |
|---------|--------|----------------------------------------------------------------------------------------------|-------------|
| Klc2    | O88448 | Kinesin light chain 2 OS=Mus musculus OX=10090 GN=Klc2 PE=1 SV=1                             | 0.76        |
| Sfxn3   | Q91V61 | Sideroflexin-3 OS=Mus musculus OX=10090 GN=Sfxn3 PE=1 SV=1                                   | 0.833333333 |
| Cfl2    | P45591 | Cofilin-2 OS=Mus musculus OX=10090 GN=Cfl2 PE=1 SV=1                                         | 0.943333333 |
| Gnaq    | P21279 | Guanine nucleotide-binding protein G(q) subunit alpha OS=Mus musculus OX=10090 GN=Gnaq PE=   | 0.966666667 |
| Rprd1b  | Q9CSU0 | Regulation of nuclear pre-mRNA domain-containing protein 1B OS=Mus musculus OX=10090 GN=R    | 0.946666667 |
| Fam98a  | Q3TJZ6 | Protein FAM98A OS=Mus musculus OX=10090 GN=Fam98a PE=1 SV=1                                  | 0.84        |
| Fam98b  | Q80VD1 | Protein FAM98B OS=Mus musculus OX=10090 GN=Fam98b PE=1 SV=1                                  | 0.876666667 |
| Snx3    | O70492 | Sorting nexin-3 OS=Mus musculus OX=10090 GN=Snx3 PE=1 SV=3                                   | 0.936666667 |
| Afg3l2  | Q8JZQ2 | AFG3-like protein 2 OS=Mus musculus OX=10090 GN=Afg3l2 PE=1 SV=1                             | 1.043333333 |
| Araf    | P04627 | Serine/threonine-protein kinase A-Raf OS=Mus musculus OX=10090 GN=Araf PE=1 SV=2             | 1.246666667 |
| Capza1  | P47753 | F-actin-capping protein subunit alpha-1 OS=Mus musculus OX=10090 GN=Capza1 PE=1 SV=4         | 0.846666667 |
| Prpsap1 | Q9D0M1 | Phosphoribosyl pyrophosphate synthase-associated protein 1 OS=Mus musculus OX=10090 GN=Prp   | 0.956666667 |
| Ppp4c   | P97470 | Serine/threonine-protein phosphatase 4 catalytic subunit OS=Mus musculus OX=10090 GN=Ppp4c   | 0.856666667 |
| Slc12a4 | Q9JIS8 | Solute carrier family 12 member 4 OS=Mus musculus OX=10090 GN=Slc12a4 PE=1 SV=2              | 0.88        |
| Rnf20   | Q5DTM8 | E3 ubiquitin-protein ligase BRE1A OS=Mus musculus OX=10090 GN=Rnf20 PE=1 SV=2                | 0.82        |
| Erlin2  | Q8BFZ9 | Erlin-2 OS=Mus musculus OX=10090 GN=Erlin2 PE=1 SV=1                                         | 0.933333333 |
| Elmo2   | Q8BHL5 | Engulfment and cell motility protein 2 OS=Mus musculus OX=10090 GN=Elmo2 PE=1 SV=1           | 0.87        |
| Hint1   | P70349 | Histidine triad nucleotide-binding protein 1 OS=Mus musculus OX=10090 GN=Hint1 PE=1 SV=3     | 0.886666667 |
| Hnrnpa0 | Q9CX86 | Heterogeneous nuclear ribonucleoprotein A0 OS=Mus musculus OX=10090 GN=Hnrnpa0 PE=1 SV=1     | 0.873333333 |
| Yap1    | P46938 | Transcriptional coactivator YAP1 OS=Mus musculus OX=10090 GN=Yap1 PE=1 SV=2                  | 0.776666667 |
| Prdx3   | P20108 | Thioredoxin-dependent peroxide reductase mitochondrial OS=Mus musculus OX=10090 GN=Prdx3     | 0.92        |
| Rac1    | P63001 | Ras-related C3 botulinum toxin substrate 1 OS=Mus musculus OX=10090 GN=Rac1 PE=1 SV=1        | 0.873333333 |
| Rab21   | P35282 | Ras-related protein Rab-21 OS=Mus musculus OX=10090 GN=Rab21 PE=1 SV=4                       | 0.886666667 |
| Coro1b  | Q9WUM3 | Coronin-1B OS=Mus musculus OX=10090 GN=Coro1b PE=1 SV=1                                      | 0.82        |
| Arfgap2 | Q99K28 | ADP-ribosylation factor GTPase-activating protein 2 OS=Mus musculus OX=10090 GN=Arfgap2 PE=1 | 0.98        |
| Vps26a  | P40336 | Vacuolar protein sorting-associated protein 26A OS=Mus musculus OX=10090 GN=Vps26a PE=1 SV=  | 0.843333333 |
| Ak2     | Q9WTP6 | Adenylate kinase 2 mitochondrial OS=Mus musculus OX=10090 GN=Ak2 PE=1 SV=5                   | 0.92        |
| Fads2   | Q9Z0R9 | Acyl-CoA 6-desaturase OS=Mus musculus OX=10090 GN=Fads2 PE=1 SV=1                            | 0.873333333 |
| Gatad2b | Q8VHR5 | Transcriptional repressor p66-beta OS=Mus musculus OX=10090 GN=Gatad2b PE=1 SV=1             | 0.82        |
| Sbf1    | Q6ZPE2 | Myotubularin-related protein 5 OS=Mus musculus OX=10090 GN=Sbf1 PE=1 SV=2                    | 0.99        |
| Cdk11b  | P24788 | Cyclin-dependent kinase 11B OS=Mus musculus OX=10090 GN=Cdk11b PE=1 SV=2                     | 0.686666667 |
| Vps26b  | Q8C0E2 | Vacuolar protein sorting-associated protein 26B OS=Mus musculus OX=10090 GN=Vps26b PE=1 SV=  | 0.94        |
| Ube2c   | Q9D1C1 | Ubiquitin-conjugating enzyme E2 C OS=Mus musculus OX=10090 GN=Ube2c PE=1 SV=1                | 0.906666667 |
| Rbm26   | Q6NZN0 | RNA-binding protein 26 OS=Mus musculus OX=10090 GN=Rbm26 PE=1 SV=2                           | 0.91        |

|          |        |                                                                                                  |             |
|----------|--------|--------------------------------------------------------------------------------------------------|-------------|
| Rbm27    | Q5SFM8 | RNA-binding protein 27 OS=Mus musculus OX=10090 GN=Rbm27 PE=1 SV=3                               | 0.926666667 |
| Bicd2    | Q921C5 | Protein bicaudal D homolog 2 OS=Mus musculus OX=10090 GN=Bicd2 PE=1 SV=1                         | 1.126666667 |
| Calm1    | P0DP26 | Calmodulin-1 OS=Mus musculus OX=10090 GN=Calm1 PE=1 SV=1                                         | 0.89        |
| Calm3    | P0DP28 | Calmodulin-3 OS=Mus musculus OX=10090 GN=Calm3 PE=1 SV=1                                         | 0.89        |
| Calm2    | P0DP27 | Calmodulin-2 OS=Mus musculus OX=10090 GN=Calm2 PE=1 SV=1                                         | 0.89        |
| Cnbp     | P53996 | Cellular nucleic acid-binding protein OS=Mus musculus OX=10090 GN=Cnbp PE=1 SV=2                 | 0.916666667 |
| Idh3g    | P70404 | Isocitrate dehydrogenase [NAD] subunit gamma 1 mitochondrial OS=Mus musculus OX=10090 GN=        | 0.883333333 |
| Rps15    | P62843 | 40S ribosomal protein S15 OS=Mus musculus OX=10090 GN=Rps15 PE=1 SV=2                            | 0.876666667 |
| Grwd1    | Q810D6 | Glutamate-rich WD repeat-containing protein 1 OS=Mus musculus OX=10090 GN=Grwd1 PE=1 SV=         | 0.843333333 |
| Rcn2     | Q8BP92 | Reticulocalbin-2 OS=Mus musculus OX=10090 GN=Rcn2 PE=1 SV=1                                      | 0.826666667 |
| Rps17    | P63276 | 40S ribosomal protein S17 OS=Mus musculus OX=10090 GN=Rps17 PE=1 SV=2                            | 0.866666667 |
| Gcc2     | Q8CHG3 | GRIP and coiled-coil domain-containing protein 2 OS=Mus musculus OX=10090 GN=Gcc2 PE=1 SV=       | 1.063333333 |
| Gas1     | Q01721 | Growth arrest-specific protein 1 OS=Mus musculus OX=10090 GN=Gas1 PE=1 SV=2                      | 0.73        |
| Fth1     | P09528 | Ferritin heavy chain OS=Mus musculus OX=10090 GN=Fth1 PE=1 SV=2                                  | 0.913333333 |
| Snap23   | O09044 | Synaptosomal-associated protein 23 OS=Mus musculus OX=10090 GN=Snap23 PE=1 SV=1                  | 0.96        |
| Uchl3    | Q9JKB1 | Ubiquitin carboxyl-terminal hydrolase isozyme L3 OS=Mus musculus OX=10090 GN=Uchl3 PE=1 SV=      | 0.88        |
| Myef2    | Q8C854 | Myelin expression factor 2 OS=Mus musculus OX=10090 GN=Myef2 PE=1 SV=1                           | 0.94        |
| Mat2b    | Q99LB6 | Methionine adenosyltransferase 2 subunit beta OS=Mus musculus OX=10090 GN=Mat2b PE=1 SV=1        | 0.883333333 |
| Sparc    | P07214 | SPARC OS=Mus musculus OX=10090 GN=Sparc PE=1 SV=1                                                | 0.85        |
| Rps6     | P62754 | 40S ribosomal protein S6 OS=Mus musculus OX=10090 GN=Rps6 PE=1 SV=1                              | 0.91        |
| Hsd17b10 | O08756 | 3-hydroxyacyl-CoA dehydrogenase type-2 OS=Mus musculus OX=10090 GN=Hsd17b10 PE=1 SV=4            | 0.8         |
| Tsfm     | Q9CZR8 | Elongation factor Ts mitochondrial OS=Mus musculus OX=10090 GN=Tsfm PE=1 SV=1                    | 0.86        |
| Atp5po   | Q9DB20 | ATP synthase subunit O mitochondrial OS=Mus musculus OX=10090 GN=Atp5po PE=1 SV=1                | 0.91        |
| Aldh7a1  | Q9DBF1 | Alpha-aminoacidic semialdehyde dehydrogenase OS=Mus musculus OX=10090 GN=Aldh7a1 PE=1 S'         | 0.86        |
| Rpl27    | P61358 | 60S ribosomal protein L27 OS=Mus musculus OX=10090 GN=Rpl27 PE=1 SV=2                            | 0.916666667 |
| Galk1    | Q9R0N0 | Galactokinase OS=Mus musculus OX=10090 GN=Galk1 PE=1 SV=2                                        | 0.88        |
| Snrnp40  | Q6PE01 | U5 small nuclear ribonucleoprotein 40 kDa protein OS=Mus musculus OX=10090 GN=Snrnp40 PE=1       | 0.86        |
| Eif3j1   | Q3UGC7 | Eukaryotic translation initiation factor 3 subunit J-A OS=Mus musculus OX=10090 GN=Eif3j1 PE=2 S | 0.933333333 |
| Eif3j2   | Q66JS6 | Eukaryotic translation initiation factor 3 subunit J-B OS=Mus musculus OX=10090 GN=Eif3j2 PE=1 S | 0.933333333 |
| Tpd52l2  | Q9CY22 | Tumor protein D54 OS=Mus musculus OX=10090 GN=Tpd52l2 PE=1 SV=1                                  | 0.87        |
| Hmox2    | O70252 | Heme oxygenase 2 OS=Mus musculus OX=10090 GN=Hmox2 PE=1 SV=1                                     | 0.923333333 |
| Wdr26    | Q8C6G8 | WD repeat-containing protein 26 OS=Mus musculus OX=10090 GN=Wdr26 PE=1 SV=3                      | 0.863333333 |
| Pcyox1   | Q9CQF9 | Prenylcysteine oxidase OS=Mus musculus OX=10090 GN=Pcyox1 PE=1 SV=1                              | 0.85        |
| Sel1l    | Q9Z2G6 | Protein sel-1 homolog 1 OS=Mus musculus OX=10090 GN=Sel1l PE=1 SV=2                              | 0.833333333 |

|         |        |                                                                                                                          |             |
|---------|--------|--------------------------------------------------------------------------------------------------------------------------|-------------|
| Nup43   | P59235 | Nucleoporin Nup43 OS=Mus musculus OX=10090 GN=Nup43 PE=1 SV=2                                                            | 0.876666667 |
| Glyr1   | Q922P9 | Putative oxidoreductase GLYR1 OS=Mus musculus OX=10090 GN=Glyr1 PE=1 SV=1                                                | 0.873333333 |
| Pus1    | Q9WU56 | tRNA pseudouridine synthase A OS=Mus musculus OX=10090 GN=Pus1 PE=1 SV=2                                                 | 0.893333333 |
| Myo7a   | P97479 | Unconventional myosin-VIIa OS=Mus musculus OX=10090 GN=Myo7a PE=1 SV=2                                                   | 1.016666667 |
| Pdk3    | Q922H2 | [Pyruvate dehydrogenase (acetyl-transferring)] kinase isozyme 3 mitochondrial OS=Mus musculus OX=10090 GN=Pdk3 PE=1 SV=2 | 1.006666667 |
| Acap2   | Q6ZQK5 | Arf-GAP with coiled-coil ANK repeat and PH domain-containing protein 2 OS=Mus musculus OX=10090 GN=Acap2 PE=1 SV=2       | 0.796666667 |
| Tmlhe   | Q91ZE0 | Trimethyllysine dioxygenase mitochondrial OS=Mus musculus OX=10090 GN=Tmlhe PE=1 SV=2                                    | 0.936666667 |
| Pgls    | Q9CQ60 | 6-phosphogluconolactonase OS=Mus musculus OX=10090 GN=Pgls PE=1 SV=1                                                     | 0.86        |
| Rdh11   | Q9QYF1 | Retinol dehydrogenase 11 OS=Mus musculus OX=10090 GN=Rdh11 PE=1 SV=2                                                     | 0.896666667 |
| Ddx24   | Q9ESV0 | ATP-dependent RNA helicase DDX24 OS=Mus musculus OX=10090 GN=Ddx24 PE=1 SV=2                                             | 0.923333333 |
| Tm9sf3  | Q9ET30 | Transmembrane 9 superfamily member 3 OS=Mus musculus OX=10090 GN=Tm9sf3 PE=1 SV=1                                        | 0.86        |
| Aldh9a1 | Q9JLJ2 | 4-trimethylaminobutyraldehyde dehydrogenase OS=Mus musculus OX=10090 GN=Aldh9a1 PE=1 SV=2                                | 0.836666667 |
| Srsf1   | Q6PDM2 | Serine/arginine-rich splicing factor 1 OS=Mus musculus OX=10090 GN=Srsf1 PE=1 SV=3                                       | 0.886666667 |
| Vps50   | Q8CI71 | Syndetin OS=Mus musculus OX=10090 GN=Vps50 PE=1 SV=2                                                                     | 0.866666667 |
| Ppp1r9b | Q6R891 | Neurabin-2 OS=Mus musculus OX=10090 GN=Ppp1r9b PE=1 SV=1                                                                 | 0.936666667 |
| Yme1l1  | O88967 | ATP-dependent zinc metalloprotease YME1L1 OS=Mus musculus OX=10090 GN=Yme1l1 PE=1 SV=1                                   | 0.913333333 |
| Nolc1   | E9Q5C9 | Nucleolar and coiled-body phosphoprotein 1 OS=Mus musculus OX=10090 GN=Nolc1 PE=1 SV=1                                   | 0.873333333 |
| Rpl19   | P84099 | 60S ribosomal protein L19 OS=Mus musculus OX=10090 GN=Rpl19 PE=1 SV=1                                                    | 0.9         |
| Atg4b   | Q8BGE6 | Cysteine protease ATG4B OS=Mus musculus OX=10090 GN=Atg4b PE=1 SV=2                                                      | 0.873333333 |
| Sgta    | Q8BJU0 | Small glutamine-rich tetratricopeptide repeat-containing protein alpha OS=Mus musculus OX=10090 GN=Sgta PE=1 SV=2        | 0.913333333 |
| Col5a2  | Q3U962 | Collagen alpha-2(V) chain OS=Mus musculus OX=10090 GN=Col5a2 PE=1 SV=1                                                   | 0.763333333 |
| Taldo1  | Q93092 | Transaldolase OS=Mus musculus OX=10090 GN=Taldo1 PE=1 SV=2                                                               | 0.833333333 |
| Pum2    | Q80U58 | Pumilio homolog 2 OS=Mus musculus OX=10090 GN=Pum2 PE=1 SV=2                                                             | 0.963333333 |
| Erbin   | Q80TH2 | Erbin OS=Mus musculus OX=10090 GN=Erbin PE=1 SV=3                                                                        | 0.803333333 |
| Wbp11   | Q923D5 | WW domain-binding protein 11 OS=Mus musculus OX=10090 GN=Wbp11 PE=1 SV=2                                                 | 1.006666667 |
| Akap8   | Q9DBR0 | A-kinase anchor protein 8 OS=Mus musculus OX=10090 GN=Akap8 PE=1 SV=1                                                    | 0.983333333 |
| Tkfc    | Q8VC30 | Triokinase/FMN cyclase OS=Mus musculus OX=10090 GN=Tkfc PE=1 SV=1                                                        | 0.84        |
| Cnot9   | Q9JKY0 | CCR4-NOT transcription complex subunit 9 OS=Mus musculus OX=10090 GN=Cnot9 PE=1 SV=1                                     | 1.013333333 |
| Psma3   | O70435 | Proteasome subunit alpha type-3 OS=Mus musculus OX=10090 GN=Psma3 PE=1 SV=3                                              | 0.916666667 |
| Nt5c2   | Q3V1L4 | Cytosolic purine 5'-nucleotidase OS=Mus musculus OX=10090 GN=Nt5c2 PE=1 SV=2                                             | 0.906666667 |
| Timm44  | O35857 | Mitochondrial import inner membrane translocase subunit TIM44 OS=Mus musculus OX=10090 GN=Tim44 PE=1 SV=2                | 0.913333333 |
| Vps36   | Q91XD6 | Vacuolar protein-sorting-associated protein 36 OS=Mus musculus OX=10090 GN=Vps36 PE=1 SV=1                               | 0.91        |
| Manf    | Q9CXI5 | Mesencephalic astrocyte-derived neurotrophic factor OS=Mus musculus OX=10090 GN=Manf PE=1 SV=1                           | 0.86        |
| Eml4    | Q3UMY5 | Echinoderm microtubule-associated protein-like 4 OS=Mus musculus OX=10090 GN=Eml4 PE=1 SV=2                              | 0.853333333 |

|          |        |                                                                                                 |             |
|----------|--------|-------------------------------------------------------------------------------------------------|-------------|
| Gpc1     | Q9QZF2 | Glypican-1 OS=Mus musculus OX=10090 GN=Gpc1 PE=1 SV=1                                           | 0.823333333 |
| Naa35    | Q6PHQ8 | N-alpha-acetyltransferase 35 NatC auxiliary subunit OS=Mus musculus OX=10090 GN=Naa35 PE=1 SV=1 | 0.926666667 |
| Ndc1     | Q8VCB1 | Nucleoporin NDC1 OS=Mus musculus OX=10090 GN=Ndc1 PE=1 SV=1                                     | 0.913333333 |
| S100a4   | P07091 | Protein S100-A4 OS=Mus musculus OX=10090 GN=S100a4 PE=1 SV=1                                    | 0.86        |
| Scyl2    | Q8CFE4 | SCY1-like protein 2 OS=Mus musculus OX=10090 GN=Scyl2 PE=1 SV=1                                 | 0.91        |
| Cyc1     | Q9D0M3 | Cytochrome c1 heme protein mitochondrial OS=Mus musculus OX=10090 GN=Cyc1 PE=1 SV=1             | 0.803333333 |
| Tpx2     | A2APB8 | Targeting protein for Xklp2 OS=Mus musculus OX=10090 GN=Tpx2 PE=1 SV=1                          | 0.826666667 |
| Eif2b2   | Q99LD9 | Translation initiation factor eIF-2B subunit beta OS=Mus musculus OX=10090 GN=Eif2b2 PE=1 SV=1  | 0.886666667 |
| Msrb3    | Q8BU85 | Methionine-R-sulfoxide reductase B3 mitochondrial OS=Mus musculus OX=10090 GN=Msrb3 PE=1 SV=1   | 0.923333333 |
| Cox4i1   | P19783 | Cytochrome c oxidase subunit 4 isoform 1 mitochondrial OS=Mus musculus OX=10090 GN=Cox4i1       | 0.953333333 |
| Lmf2     | Q8C3X8 | Lipase maturation factor 2 OS=Mus musculus OX=10090 GN=Lmf2 PE=1 SV=1                           | 0.856666667 |
| Idi1     | P58044 | Isopentenyl-diphosphate Delta-isomerase 1 OS=Mus musculus OX=10090 GN=Idi1 PE=1 SV=1            | 0.866666667 |
| Bcas2    | Q9D287 | Pre-mRNA-splicing factor SPF27 OS=Mus musculus OX=10090 GN=Bcas2 PE=1 SV=1                      | 0.913333333 |
| Fam114a2 | Q8VE88 | Protein FAM114A2 OS=Mus musculus OX=10090 GN=Fam114a2 PE=1 SV=2                                 | 0.93        |
| Bgn      | P28653 | Biglycan OS=Mus musculus OX=10090 GN=Bgn PE=1 SV=1                                              | 0.973333333 |
| Map4k5   | Q8BPM2 | Mitogen-activated protein kinase kinase kinase 5 OS=Mus musculus OX=10090 GN=Map4k5             | 0.793333333 |
| Dap3     | Q9ER88 | 28S ribosomal protein S29 mitochondrial OS=Mus musculus OX=10090 GN=Dap3 PE=1 SV=1              | 0.873333333 |
| Vta1     | Q9CR26 | Vacuolar protein sorting-associated protein VTA1 homolog OS=Mus musculus OX=10090 GN=Vta1       | 0.89        |
| Rpl11    | Q9CXW4 | 60S ribosomal protein L11 OS=Mus musculus OX=10090 GN=Rpl11 PE=1 SV=4                           | 0.923333333 |
| Ccn1     | P18406 | CCN family member 1 OS=Mus musculus OX=10090 GN=Ccn1 PE=1 SV=1                                  | 0.936666667 |
| Prkag1   | O54950 | 5'-AMP-activated protein kinase subunit gamma-1 OS=Mus musculus OX=10090 GN=Prkag1 PE=1 SV=1    | 0.876666667 |
| Nedd1    | P33215 | Protein NEDD1 OS=Mus musculus OX=10090 GN=Nedd1 PE=1 SV=2                                       | 0.876666667 |
| Sqor     | Q9R112 | Sulfide:quinone oxidoreductase mitochondrial OS=Mus musculus OX=10090 GN=Sqor PE=1 SV=3         | 0.996666667 |
| Fech     | P22315 | Ferrochelatase mitochondrial OS=Mus musculus OX=10090 GN=Fech PE=1 SV=2                         | 0.933333333 |
| Nucb2    | P81117 | Nucleobindin-2 OS=Mus musculus OX=10090 GN=Nucb2 PE=1 SV=2                                      | 1.013333333 |
| Rpl18    | P35980 | 60S ribosomal protein L18 OS=Mus musculus OX=10090 GN=Rpl18 PE=1 SV=3                           | 0.91        |
| Snrpa1   | P57784 | U2 small nuclear ribonucleoprotein A' OS=Mus musculus OX=10090 GN=Snrpa1 PE=1 SV=2              | 0.896666667 |
| Exoc1    | Q8R3S6 | Exocyst complex component 1 OS=Mus musculus OX=10090 GN=Exoc1 PE=1 SV=4                         | 0.963333333 |
| Ppp1r21  | Q3TDD9 | Protein phosphatase 1 regulatory subunit 21 OS=Mus musculus OX=10090 GN=Ppp1r21 PE=1 SV=2       | 0.903333333 |
| Trim32   | Q8CH72 | E3 ubiquitin-protein ligase TRIM32 OS=Mus musculus OX=10090 GN=Trim32 PE=1 SV=2                 | 1.11        |
| Zc3hc1   | Q80YV2 | Nuclear-interacting partner of ALK OS=Mus musculus OX=10090 GN=Zc3hc1 PE=1 SV=1                 | 0.92        |
| Slc25a11 | Q9CR62 | Mitochondrial 2-oxoglutarate/malate carrier protein OS=Mus musculus OX=10090 GN=Slc25a11        | 0.813333333 |
| Rpl18a   | P62717 | 60S ribosomal protein L18a OS=Mus musculus OX=10090 GN=Rpl18a PE=1 SV=1                         | 0.906666667 |
| Ppme1    | Q8BVQ5 | Protein phosphatase methylesterase 1 OS=Mus musculus OX=10090 GN=Ppme1 PE=1 SV=5                | 0.886666667 |

|           |        |                                                                                                    |             |
|-----------|--------|----------------------------------------------------------------------------------------------------|-------------|
| EEF1AKNMT | Q91YR5 | eEF1A lysine and N-terminal methyltransferase OS=Mus musculus OX=10090 GN=EEF1AKNMT PE=1 SV=1      | 1.006666667 |
| Plod2     | Q9R0B9 | Procollagen-lysine 2-oxoglutarate 5-dioxygenase 2 OS=Mus musculus OX=10090 GN=Plod2 PE=1 SV=1      | 0.96        |
| Atp5f1c   | Q91VR2 | ATP synthase subunit gamma mitochondrial OS=Mus musculus OX=10090 GN=Atp5f1c PE=1 SV=1             | 0.99        |
| Il6st     | Q00560 | Interleukin-6 receptor subunit beta OS=Mus musculus OX=10090 GN=Il6st PE=1 SV=2                    | 0.746666667 |
| Impa1     | O55023 | Inositol monophosphatase 1 OS=Mus musculus OX=10090 GN=Impa1 PE=1 SV=1                             | 0.903333333 |
| Hccs      | P53702 | Cytochrome c-type heme lyase OS=Mus musculus OX=10090 GN=Hccs PE=1 SV=2                            | 0.8         |
| Peak1     | Q69Z38 | Inactive tyrosine-protein kinase PEAK1 OS=Mus musculus OX=10090 GN=Peak1 PE=1 SV=4                 | 0.983333333 |
| Hgs       | Q99LI8 | Hepatocyte growth factor-regulated tyrosine kinase substrate OS=Mus musculus OX=10090 GN=Hgs       | 0.976666667 |
| Ptpa      | P58389 | Serine/threonine-protein phosphatase 2A activator OS=Mus musculus OX=10090 GN=Ptpa PE=1 SV=1       | 0.806666667 |
| Pxn       | Q8VI36 | Paxillin OS=Mus musculus OX=10090 GN=Pxn PE=1 SV=1                                                 | 0.926666667 |
| Trip13    | Q3UA06 | Pachytene checkpoint protein 2 homolog OS=Mus musculus OX=10090 GN=Trip13 PE=1 SV=1                | 0.85        |
| Psph      | Q99LS3 | Phosphoserine phosphatase OS=Mus musculus OX=10090 GN=Psph PE=1 SV=1                               | 0.896666667 |
| Ric8a     | Q3TIR3 | Synembryn-A OS=Mus musculus OX=10090 GN=Ric8a PE=1 SV=2                                            | 1.116666667 |
| Chaf1a    | Q9QWF0 | Chromatin assembly factor 1 subunit A OS=Mus musculus OX=10090 GN=Chaf1a PE=1 SV=1                 | 0.966666667 |
| Crtap     | Q9CYD3 | Cartilage-associated protein OS=Mus musculus OX=10090 GN=Crtap PE=1 SV=3                           | 0.933333333 |
| Srbd1     | Q497V5 | S1 RNA-binding domain-containing protein 1 OS=Mus musculus OX=10090 GN=Srbd1 PE=2 SV=3             | 1.156666667 |
| Dnajc3    | Q91YW3 | DnaJ homolog subfamily C member 3 OS=Mus musculus OX=10090 GN=Dnajc3 PE=1 SV=1                     | 0.876666667 |
| Npr3      | P70180 | Atrial natriuretic peptide receptor 3 OS=Mus musculus OX=10090 GN=Npr3 PE=1 SV=3                   | 0.9         |
| Nle1      | Q8VEJ4 | Notchless protein homolog 1 OS=Mus musculus OX=10090 GN=Nle1 PE=1 SV=4                             | 0.8         |
| Rpl13     | P47963 | 60S ribosomal protein L13 OS=Mus musculus OX=10090 GN=Rpl13 PE=1 SV=3                              | 0.873333333 |
| Cpt2      | P52825 | Carnitine O-palmitoyltransferase 2 mitochondrial OS=Mus musculus OX=10090 GN=Cpt2 PE=1 SV=1        | 0.99        |
| Grb2      | Q60631 | Growth factor receptor-bound protein 2 OS=Mus musculus OX=10090 GN=Grb2 PE=1 SV=1                  | 0.94        |
| Msto1     | Q2YDW2 | Protein misato homolog 1 OS=Mus musculus OX=10090 GN=Msto1 PE=1 SV=1                               | 1.07        |
| Wdr4      | Q9EP82 | tRNA (guanine-N(7)-)-methyltransferase non-catalytic subunit WDR4 OS=Mus musculus OX=10090 GN=Wdr4 | 1.08        |
| Exoc7     | O35250 | Exocyst complex component 7 OS=Mus musculus OX=10090 GN=Exoc7 PE=1 SV=2                            | 0.853333333 |
| Ddx56     | Q9D0R4 | Probable ATP-dependent RNA helicase DDX56 OS=Mus musculus OX=10090 GN=Ddx56 PE=2 SV=1              | 0.833333333 |
| Xrn1      | P97789 | 5'-3' exoribonuclease 1 OS=Mus musculus OX=10090 GN=Xrn1 PE=1 SV=1                                 | 0.866666667 |
| Nif3l1    | Q9EQ80 | NIF3-like protein 1 OS=Mus musculus OX=10090 GN=Nif3l1 PE=1 SV=4                                   | 0.86        |
| Uchl5     | Q9WUP7 | Ubiquitin carboxyl-terminal hydrolase isozyme L5 OS=Mus musculus OX=10090 GN=Uchl5 PE=1 SV=1       | 0.903333333 |
| Tfip11    | Q9ERA6 | Tuftelin-interacting protein 11 OS=Mus musculus OX=10090 GN=Tfip11 PE=1 SV=1                       | 0.813333333 |
| Chp1      | P61022 | Calcineurin B homologous protein 1 OS=Mus musculus OX=10090 GN=Chp1 PE=1 SV=2                      | 0.9         |
| Dok1      | P97465 | Docking protein 1 OS=Mus musculus OX=10090 GN=Dok1 PE=1 SV=2                                       | 0.903333333 |
| Tom1      | O88746 | Target of Myb protein 1 OS=Mus musculus OX=10090 GN=Tom1 PE=1 SV=1                                 | 0.783333333 |
| Scpep1    | Q920A5 | Retinoid-inducible serine carboxypeptidase OS=Mus musculus OX=10090 GN=Scpep1 PE=1 SV=2            | 0.873333333 |



|        |        |                                                                                                               |             |
|--------|--------|---------------------------------------------------------------------------------------------------------------|-------------|
| Rps18  | P62270 | 40S ribosomal protein S18 OS=Mus musculus OX=10090 GN=Rps18 PE=1 SV=3                                         | 0.913333333 |
| Tk1    | P04184 | Thymidine kinase cytosolic OS=Mus musculus OX=10090 GN=Tk1 PE=1 SV=3                                          | 0.87        |
| Ilkap  | Q8R0F6 | Integrin-linked kinase-associated serine/threonine phosphatase 2C OS=Mus musculus OX=10090 GN=Ilkap PE=1 SV=2 | 0.873333333 |
| Hbs1l  | Q69ZS7 | HBS1-like protein OS=Mus musculus OX=10090 GN=Hbs1l PE=1 SV=2                                                 | 1.08        |
| Hspe1  | Q64433 | 10 kDa heat shock protein mitochondrial OS=Mus musculus OX=10090 GN=Hspe1 PE=1 SV=2                           | 0.926666667 |
| Eci2   | Q9WUR2 | Enoyl-CoA delta isomerase 2 OS=Mus musculus OX=10090 GN=Eci2 PE=1 SV=2                                        | 0.816666667 |
| Pbk    | Q9JJ78 | Lymphokine-activated killer T-cell-originated protein kinase OS=Mus musculus OX=10090 GN=Pbk PE=1 SV=2        | 0.856666667 |
| Cog7   | Q3UM29 | Conserved oligomeric Golgi complex subunit 7 OS=Mus musculus OX=10090 GN=Cog7 PE=1 SV=1                       | 1.11        |
| Ncapg2 | Q6DFV1 | Condensin-2 complex subunit G2 OS=Mus musculus OX=10090 GN=Ncapg2 PE=1 SV=2                                   | 0.736666667 |
| Llgl1  | Q80Y17 | Lethal(2) giant larvae protein homolog 1 OS=Mus musculus OX=10090 GN=Llgl1 PE=1 SV=1                          | 0.763333333 |
| H6pd   | Q8CFX1 | GDH/6PGL endoplasmic bifunctional protein OS=Mus musculus OX=10090 GN=H6pd PE=1 SV=2                          | 0.913333333 |
| Parn   | Q8VDG3 | Poly(A)-specific ribonuclease PARN OS=Mus musculus OX=10090 GN=Parn PE=1 SV=1                                 | 1.013333333 |
| Trip10 | Q8CJ53 | Cdc42-interacting protein 4 OS=Mus musculus OX=10090 GN=Trip10 PE=1 SV=2                                      | 0.99        |
| Ddr2   | Q62371 | Discoidin domain-containing receptor 2 OS=Mus musculus OX=10090 GN=Ddr2 PE=1 SV=2                             | 0.83        |
| Nr2f2  | P43135 | COUP transcription factor 2 OS=Mus musculus OX=10090 GN=Nr2f2 PE=1 SV=2                                       | 0.853333333 |
| Ythdf2 | Q91YT7 | YTH domain-containing family protein 2 OS=Mus musculus OX=10090 GN=Ythdf2 PE=1 SV=1                           | 0.856666667 |
| Prps1  | Q9D7G0 | Ribose-phosphate pyrophosphokinase 1 OS=Mus musculus OX=10090 GN=Prps1 PE=1 SV=4                              | 0.853333333 |
| Kpna6  | O35345 | Importin subunit alpha-7 OS=Mus musculus OX=10090 GN=Kpna6 PE=1 SV=2                                          | 0.973333333 |
| Prkaca | P05132 | cAMP-dependent protein kinase catalytic subunit alpha OS=Mus musculus OX=10090 GN=Prkaca PE=1 SV=2            | 0.876666667 |
| Mark2  | Q05512 | Serine/threonine-protein kinase MARK2 OS=Mus musculus OX=10090 GN=Mark2 PE=1 SV=3                             | 0.946666667 |
| Gstm2  | P15626 | Glutathione S-transferase Mu 2 OS=Mus musculus OX=10090 GN=Gstm2 PE=1 SV=2                                    | 0.916666667 |
| Ehd4   | Q9EQP2 | EH domain-containing protein 4 OS=Mus musculus OX=10090 GN=Ehd4 PE=1 SV=1                                     | 0.85        |
| Cstf2  | Q8BIQ5 | Cleavage stimulation factor subunit 2 OS=Mus musculus OX=10090 GN=Cstf2 PE=1 SV=2                             | 0.816666667 |
| Pycr1  | Q922W5 | Pyrroline-5-carboxylate reductase 1 mitochondrial OS=Mus musculus OX=10090 GN=Pycr1 PE=1 SV=2                 | 0.81        |
| Fmnl3  | Q6ZPF4 | Formin-like protein 3 OS=Mus musculus OX=10090 GN=Fmnl3 PE=1 SV=2                                             | 0.766666667 |
| Bzw2   | Q91VK1 | Basic leucine zipper and W2 domain-containing protein 2 OS=Mus musculus OX=10090 GN=Bzw2 PE=1 SV=2            | 0.846666667 |
| Camk1  | Q91YS8 | Calcium/calmodulin-dependent protein kinase type 1 OS=Mus musculus OX=10090 GN=Camk1 PE=1 SV=2                | 0.856666667 |
| Gnao1  | P18872 | Guanine nucleotide-binding protein G(o) subunit alpha OS=Mus musculus OX=10090 GN=Gnao1 PE=1 SV=2             | 0.963333333 |
| Map1a  | Q9QYR6 | Microtubule-associated protein 1A OS=Mus musculus OX=10090 GN=Map1a PE=1 SV=2                                 | 1.373333333 |
| Dlg1   | Q811D0 | Disks large homolog 1 OS=Mus musculus OX=10090 GN=Dlg1 PE=1 SV=1                                              | 1.02        |
| Naa10  | Q9QY36 | N-alpha-acetyltransferase 10 OS=Mus musculus OX=10090 GN=Naa10 PE=1 SV=1                                      | 0.826666667 |
| Rab10  | P61027 | Ras-related protein Rab-10 OS=Mus musculus OX=10090 GN=Rab10 PE=1 SV=1                                        | 0.86        |
| Hdgfl2 | Q3UMU9 | Hepatoma-derived growth factor-related protein 2 OS=Mus musculus OX=10090 GN=Hdgfl2 PE=1 SV=2                 | 0.846666667 |
| Cpne3  | Q8BT60 | Copine-3 OS=Mus musculus OX=10090 GN=Cpne3 PE=1 SV=2                                                          | 0.9         |

|         |        |                                                                                                                                             |             |
|---------|--------|---------------------------------------------------------------------------------------------------------------------------------------------|-------------|
| Oxsr1   | Q6P9R2 | Serine/threonine-protein kinase OSR1 OS=Mus musculus OX=10090 GN=Oxsr1 PE=1 SV=1                                                            | 0.946666667 |
| Smarcd2 | Q99JR8 | SWI/SNF-related matrix-associated actin-dependent regulator of chromatin subfamily D member 2 OS=Mus musculus OX=10090 GN=Smarcd2 PE=1 SV=1 | 1.013333333 |
| Ras2    | P62071 | Ras-related protein R-Ras2 OS=Mus musculus OX=10090 GN=Ras2 PE=1 SV=1                                                                       | 0.893333333 |
| Vps4b   | P46467 | Vacuolar protein sorting-associated protein 4B OS=Mus musculus OX=10090 GN=Vps4b PE=1 SV=2                                                  | 0.866666667 |
| Hnrnpab | Q99020 | Heterogeneous nuclear ribonucleoprotein A/B OS=Mus musculus OX=10090 GN=Hnrnpab PE=1 SV=1                                                   | 0.893333333 |
| Cnn3    | Q9DAW9 | Calponin-3 OS=Mus musculus OX=10090 GN=Cnn3 PE=1 SV=1                                                                                       | 0.9         |
| Ppib    | P24369 | Peptidyl-prolyl cis-trans isomerase B OS=Mus musculus OX=10090 GN=Ppib PE=1 SV=2                                                            | 0.89        |
| Celf1   | P28659 | CUGBP Elav-like family member 1 OS=Mus musculus OX=10090 GN=Celf1 PE=1 SV=2                                                                 | 0.893333333 |
| Ube2k   | P61087 | Ubiquitin-conjugating enzyme E2 K OS=Mus musculus OX=10090 GN=Ube2k PE=1 SV=3                                                               | 0.863333333 |
| Rrs1    | Q9CYH6 | Ribosome biogenesis regulatory protein homolog OS=Mus musculus OX=10090 GN=Rrs1 PE=1 SV=1                                                   | 0.84        |
| Enah    | Q03173 | Protein enabled homolog OS=Mus musculus OX=10090 GN=Enah PE=1 SV=2                                                                          | 0.913333333 |
| Noc4l   | Q8BHY2 | Nucleolar complex protein 4 homolog OS=Mus musculus OX=10090 GN=Noc4l PE=2 SV=1                                                             | 0.856666667 |
| Uap1    | Q91YN5 | UDP-N-acetylhexosamine pyrophosphorylase OS=Mus musculus OX=10090 GN=Uap1 PE=1 SV=1                                                         | 0.826666667 |
| Apbb2   | Q9DBR4 | Amyloid-beta A4 precursor protein-binding family B member 2 OS=Mus musculus OX=10090 GN=Apbb2 PE=1 SV=1                                     | 0.803333333 |
| Csk     | P41241 | Tyrosine-protein kinase CSK OS=Mus musculus OX=10090 GN=Csk PE=1 SV=2                                                                       | 0.863333333 |
| Kif20b  | Q80WE4 | Kinesin-like protein KIF20B OS=Mus musculus OX=10090 GN=Kif20b PE=1 SV=3                                                                    | 1.143333333 |
| Psma5   | Q9Z2U1 | Proteasome subunit alpha type-5 OS=Mus musculus OX=10090 GN=Psma5 PE=1 SV=1                                                                 | 0.883333333 |
| Apex1   | P28352 | DNA-(apurinic or apyrimidinic site) endonuclease OS=Mus musculus OX=10090 GN=Apex1 PE=1 SV=1                                                | 0.846666667 |
| Set     | Q9EQU5 | Protein SET OS=Mus musculus OX=10090 GN=Set PE=1 SV=1                                                                                       | 0.94        |
| Rcc1    | Q8VE37 | Regulator of chromosome condensation OS=Mus musculus OX=10090 GN=Rcc1 PE=1 SV=1                                                             | 0.933333333 |
| Cope    | O89079 | Coatomer subunit epsilon OS=Mus musculus OX=10090 GN=Cope PE=1 SV=3                                                                         | 0.903333333 |
| Bcat1   | P24288 | Branched-chain-amino-acid aminotransferase cytosolic OS=Mus musculus OX=10090 GN=Bcat1 PE=1 SV=1                                            | 0.886666667 |
| Rps14   | P62264 | 40S ribosomal protein S14 OS=Mus musculus OX=10090 GN=Rps14 PE=1 SV=3                                                                       | 0.926666667 |
| St13    | Q99L47 | Hsc70-interacting protein OS=Mus musculus OX=10090 GN=St13 PE=1 SV=1                                                                        | 0.886666667 |
| Atxn2   | O70305 | Ataxin-2 OS=Mus musculus OX=10090 GN=Atxn2 PE=1 SV=1                                                                                        | 0.95        |
| Bcap31  | Q61335 | B-cell receptor-associated protein 31 OS=Mus musculus OX=10090 GN=Bcap31 PE=1 SV=4                                                          | 0.89        |
| Ptges3  | Q9R0Q7 | Prostaglandin E synthase 3 OS=Mus musculus OX=10090 GN=Ptges3 PE=1 SV=1                                                                     | 0.856666667 |
| Ctsa    | P16675 | Lysosomal protective protein OS=Mus musculus OX=10090 GN=Ctsa PE=1 SV=1                                                                     | 0.883333333 |
| Eif3f   | Q9DCH4 | Eukaryotic translation initiation factor 3 subunit F OS=Mus musculus OX=10090 GN=Eif3f PE=1 SV=1                                            | 0.873333333 |
| Sephs1  | Q8BH69 | Selenide water dikinase 1 OS=Mus musculus OX=10090 GN=Sephs1 PE=1 SV=1                                                                      | 0.89        |
| Opa1    | P58281 | Dynamin-like 120 kDa protein mitochondrial OS=Mus musculus OX=10090 GN=Opa1 PE=1 SV=1                                                       | 1.063333333 |
| Utp18   | Q5SSI6 | U3 small nucleolar RNA-associated protein 18 homolog OS=Mus musculus OX=10090 GN=Utp18 PE=1 SV=1                                            | 0.866666667 |
| Snrnp70 | Q62376 | U1 small nuclear ribonucleoprotein 70 kDa OS=Mus musculus OX=10090 GN=Snrnp70 PE=1 SV=2                                                     | 0.906666667 |
| Ppa2    | Q91VM9 | Inorganic pyrophosphatase 2 mitochondrial OS=Mus musculus OX=10090 GN=Ppa2 PE=1 SV=1                                                        | 0.923333333 |

|         |        |                                                                                            |             |
|---------|--------|--------------------------------------------------------------------------------------------|-------------|
| Rae1    | Q8C570 | mRNA export factor OS=Mus musculus OX=10090 GN=Rae1 PE=1 SV=1                              | 0.87        |
| Fhl3    | Q9R059 | Four and a half LIM domains protein 3 OS=Mus musculus OX=10090 GN=Fhl3 PE=1 SV=2           | 0.883333333 |
| Acaa1a  | Q921H8 | 3-ketoacyl-CoA thiolase A peroxisomal OS=Mus musculus OX=10090 GN=Acaa1a PE=1 SV=1         | 0.82        |
| Faf2    | Q3TDN2 | FAS-associated factor 2 OS=Mus musculus OX=10090 GN=Faf2 PE=1 SV=2                         | 0.86        |
| Tbc1d8b | A3KGB4 | TBC1 domain family member 8B OS=Mus musculus OX=10090 GN=Tbc1d8b PE=1 SV=1                 | 0.8         |
| Tm9sf2  | P58021 | Transmembrane 9 superfamily member 2 OS=Mus musculus OX=10090 GN=Tm9sf2 PE=1 SV=1          | 0.873333333 |
| Cdv3    | Q4VAA2 | Protein CDV3 OS=Mus musculus OX=10090 GN=Cdv3 PE=1 SV=2                                    | 0.826666667 |
| Psmb1   | O09061 | Proteasome subunit beta type-1 OS=Mus musculus OX=10090 GN=Psmb1 PE=1 SV=1                 | 0.89        |
| Wdr74   | Q8VCG3 | WD repeat-containing protein 74 OS=Mus musculus OX=10090 GN=Wdr74 PE=2 SV=1                | 0.81        |
| Ergic1  | Q9DC16 | Endoplasmic reticulum-Golgi intermediate compartment protein 1 OS=Mus musculus OX=10090 G  | 0.876666667 |
| Psmd4   | O35226 | 26S proteasome non-ATPase regulatory subunit 4 OS=Mus musculus OX=10090 GN=Psmd4 PE=1 SV=  | 0.863333333 |
| Brix1   | Q9DCA5 | Ribosome biogenesis protein BRX1 homolog OS=Mus musculus OX=10090 GN=Brix1 PE=1 SV=3       | 0.833333333 |
| Nrbp1   | Q99J45 | Nuclear receptor-binding protein OS=Mus musculus OX=10090 GN=Nrbp1 PE=1 SV=1               | 0.836666667 |
| Arhgap1 | Q5FWK3 | Rho GTPase-activating protein 1 OS=Mus musculus OX=10090 GN=Arhgap1 PE=1 SV=1              | 0.833333333 |
| Pawr    | Q925B0 | PRKC apoptosis WT1 regulator protein OS=Mus musculus OX=10090 GN=Pawr PE=1 SV=2            | 0.89        |
| Parp3   | Q3ULW8 | Protein mono-ADP-ribosyltransferase PARP3 OS=Mus musculus OX=10090 GN=Parp3 PE=2 SV=1      | 0.85        |
| Hnrnpc  | Q9Z204 | Heterogeneous nuclear ribonucleoproteins C1/C2 OS=Mus musculus OX=10090 GN=Hnrnpc PE=1 S'  | 0.883333333 |
| Nip7    | Q9CXK8 | 60S ribosome subunit biogenesis protein NIP7 homolog OS=Mus musculus OX=10090 GN=Nip7 PE=  | 0.91        |
| Dido1   | Q8C9B9 | Death-inducer obliterator 1 OS=Mus musculus OX=10090 GN=Dido1 PE=1 SV=4                    | 0.686666667 |
| Spr     | Q64105 | Sepiapterin reductase OS=Mus musculus OX=10090 GN=Spr PE=1 SV=1                            | 0.843333333 |
| Rps15a  | P62245 | 40S ribosomal protein S15a OS=Mus musculus OX=10090 GN=Rps15a PE=1 SV=2                    | 0.896666667 |
| Gtf2f1  | Q3THK3 | General transcription factor IIF subunit 1 OS=Mus musculus OX=10090 GN=Gtf2f1 PE=1 SV=2    | 0.88        |
| Slc12a2 | P55012 | Solute carrier family 12 member 2 OS=Mus musculus OX=10090 GN=Slc12a2 PE=1 SV=2            | 0.886666667 |
| Trip6   | Q9Z1Y4 | Thyroid receptor-interacting protein 6 OS=Mus musculus OX=10090 GN=Trip6 PE=1 SV=1         | 0.94        |
| Nub1    | P54729 | NEDD8 ultimate buster 1 OS=Mus musculus OX=10090 GN=Nub1 PE=1 SV=2                         | 0.886666667 |
| Rfc5    | Q9D0F6 | Replication factor C subunit 5 OS=Mus musculus OX=10090 GN=Rfc5 PE=1 SV=1                  | 0.92        |
| Rpl9    | P51410 | 60S ribosomal protein L9 OS=Mus musculus OX=10090 GN=Rpl9 PE=2 SV=2                        | 0.873333333 |
| Pbdc1   | Q9D0B6 | Protein PBDC1 OS=Mus musculus OX=10090 GN=Pbdc1 PE=1 SV=1                                  | 0.896666667 |
| Wdr46   | Q9Z0H1 | WD repeat-containing protein 46 OS=Mus musculus OX=10090 GN=Wdr46 PE=2 SV=1                | 0.85        |
| Dnaaf5  | B9EJR8 | Dynein assembly factor 5 axonemal OS=Mus musculus OX=10090 GN=Dnaaf5 PE=1 SV=1             | 0.936666667 |
| Lrpap1  | P55302 | Alpha-2-macroglobulin receptor-associated protein OS=Mus musculus OX=10090 GN=Lrpap1 PE=1  | 0.933333333 |
| Pigs    | Q6PD26 | GPI transamidase component PIG-S OS=Mus musculus OX=10090 GN=Pigs PE=1 SV=3                | 0.953333333 |
| Acsf2   | Q8VCW8 | Medium-chain acyl-CoA ligase ACSF2 mitochondrial OS=Mus musculus OX=10090 GN=Acsf2 PE=1 S' | 0.876666667 |
| Ppp1r8  | Q8R3G1 | Nuclear inhibitor of protein phosphatase 1 OS=Mus musculus OX=10090 GN=Ppp1r8 PE=1 SV=1    | 0.846666667 |

|         |        |                                                                                                         |             |
|---------|--------|---------------------------------------------------------------------------------------------------------|-------------|
| Gas2    | P11862 | Growth arrest-specific protein 2 OS=Mus musculus OX=10090 GN=Gas2 PE=1 SV=1                             | 0.833333333 |
| Mccc1   | Q99MR8 | Methylcrotonoyl-CoA carboxylase subunit alpha mitochondrial OS=Mus musculus OX=10090 GN=Mccc1 PE=1 SV=1 | 1.03        |
| Ptgr1   | Q91YR9 | Prostaglandin reductase 1 OS=Mus musculus OX=10090 GN=Ptgr1 PE=1 SV=2                                   | 0.903333333 |
| Lancl2  | Q9JJK2 | LanC-like protein 2 OS=Mus musculus OX=10090 GN=Lancl2 PE=1 SV=1                                        | 0.873333333 |
| Nudt21  | Q9CQF3 | Cleavage and polyadenylation specificity factor subunit 5 OS=Mus musculus OX=10090 GN=Nudt21 PE=1 SV=1  | 0.933333333 |
| Adprh   | P54923 | [Protein ADP-ribosylarginine] hydrolase OS=Mus musculus OX=10090 GN=Adprh PE=1 SV=1                     | 0.813333333 |
| Syap1   | Q9D5V6 | Synapse-associated protein 1 OS=Mus musculus OX=10090 GN=Syap1 PE=1 SV=1                                | 0.943333333 |
| Smyd5   | Q3TYX3 | SET and MYND domain-containing protein 5 OS=Mus musculus OX=10090 GN=Smyd5 PE=1 SV=2                    | 0.863333333 |
| Etfb    | Q9DCW4 | Electron transfer flavoprotein subunit beta OS=Mus musculus OX=10090 GN=Etfb PE=1 SV=3                  | 0.87        |
| Dhfr    | P00375 | Dihydrofolate reductase OS=Mus musculus OX=10090 GN=Dhfr PE=1 SV=3                                      | 0.856666667 |
| Rpf2    | Q9JJ80 | Ribosome production factor 2 homolog OS=Mus musculus OX=10090 GN=Rpf2 PE=2 SV=2                         | 0.896666667 |
| Srprb   | P47758 | Signal recognition particle receptor subunit beta OS=Mus musculus OX=10090 GN=Srprb PE=1 SV=1           | 0.863333333 |
| Sh3gl1  | Q62419 | Endophilin-A2 OS=Mus musculus OX=10090 GN=Sh3gl1 PE=1 SV=1                                              | 0.863333333 |
| Wapl    | Q65Z40 | Wings apart-like protein homolog OS=Mus musculus OX=10090 GN=Wapl PE=1 SV=2                             | 0.866666667 |
| Vrk1    | Q80X41 | Serine/threonine-protein kinase VRK1 OS=Mus musculus OX=10090 GN=Vrk1 PE=1 SV=2                         | 0.886666667 |
| Kifbp   | Q6ZPU9 | KIF-binding protein OS=Mus musculus OX=10090 GN=Kifbp PE=1 SV=2                                         | 0.763333333 |
| Zzef1   | Q5SSH7 | Zinc finger ZZ-type and EF-hand domain-containing protein 1 OS=Mus musculus OX=10090 GN=Zzef1 PE=1 SV=1 | 0.656666667 |
| Rps10   | P63325 | 40S ribosomal protein S10 OS=Mus musculus OX=10090 GN=Rps10 PE=1 SV=1                                   | 0.863333333 |
| Thoc5   | Q8BKT7 | THO complex subunit 5 homolog OS=Mus musculus OX=10090 GN=Thoc5 PE=1 SV=2                               | 0.983333333 |
| Poldip3 | Q8BG81 | Polymerase delta-interacting protein 3 OS=Mus musculus OX=10090 GN=Poldip3 PE=1 SV=1                    | 0.773333333 |
| Hprt1   | P00493 | Hypoxanthine-guanine phosphoribosyltransferase OS=Mus musculus OX=10090 GN=Hprt1 PE=1 SV=1              | 0.943333333 |
| Pepd    | Q11136 | Xaa-Pro dipeptidase OS=Mus musculus OX=10090 GN=Pepd PE=1 SV=3                                          | 0.88        |
| Wdr6    | Q99ME2 | WD repeat-containing protein 6 OS=Mus musculus OX=10090 GN=Wdr6 PE=1 SV=1                               | 0.73        |
| Txn     | P10639 | Thioredoxin OS=Mus musculus OX=10090 GN=Txn PE=1 SV=3                                                   | 0.853333333 |
| S100a6  | P14069 | Protein S100-A6 OS=Mus musculus OX=10090 GN=S100a6 PE=1 SV=3                                            | 0.95        |
| Usp10   | P52479 | Ubiquitin carboxyl-terminal hydrolase 10 OS=Mus musculus OX=10090 GN=Usp10 PE=1 SV=3                    | 0.863333333 |
| Sltm    | Q8CH25 | SAFB-like transcription modulator OS=Mus musculus OX=10090 GN=Sltm PE=1 SV=1                            | 0.85        |
| Flot2   | Q60634 | Flotillin-2 OS=Mus musculus OX=10090 GN=Flot2 PE=1 SV=2                                                 | 0.853333333 |
| Igfbp1  | Q61249 | Immunoglobulin-binding protein 1 OS=Mus musculus OX=10090 GN=Igfbp1 PE=1 SV=1                           | 0.826666667 |
| Rpl23a  | P62751 | 60S ribosomal protein L23a OS=Mus musculus OX=10090 GN=Rpl23a PE=1 SV=1                                 | 0.88        |
| Pofut2  | Q8VHI3 | GDP-fucose protein O-fucosyltransferase 2 OS=Mus musculus OX=10090 GN=Pofut2 PE=1 SV=1                  | 0.916666667 |
| Acbd3   | Q8BMP6 | Golgi resident protein GCP60 OS=Mus musculus OX=10090 GN=Acbd3 PE=1 SV=3                                | 0.926666667 |
| Ak3     | Q9WTP7 | GTP:AMP phosphotransferase AK3 mitochondrial OS=Mus musculus OX=10090 GN=Ak3 PE=1 SV=3                  | 0.826666667 |
| Esf1    | Q3V1V3 | ESF1 homolog OS=Mus musculus OX=10090 GN=Esf1 PE=1 SV=1                                                 | 0.883333333 |

|           |        |                                                                                                                |             |
|-----------|--------|----------------------------------------------------------------------------------------------------------------|-------------|
| Ubxn1     | Q922Y1 | UBX domain-containing protein 1 OS=Mus musculus OX=10090 GN=Ubxn1 PE=1 SV=1                                    | 0.796666667 |
| Bysl      | O54825 | Bystin OS=Mus musculus OX=10090 GN=Bysl PE=1 SV=3                                                              | 0.796666667 |
| Atg7      | Q9D906 | Ubiquitin-like modifier-activating enzyme ATG7 OS=Mus musculus OX=10090 GN=Atg7 PE=1 SV=1                      | 0.79        |
| Gabpa     | Q00422 | GA-binding protein alpha chain OS=Mus musculus OX=10090 GN=Gabpa PE=1 SV=2                                     | 1.003333333 |
| Prim1     | P20664 | DNA primase small subunit OS=Mus musculus OX=10090 GN=Prim1 PE=1 SV=1                                          | 0.913333333 |
| Mrps22    | Q9CXW2 | 28S ribosomal protein S22 mitochondrial OS=Mus musculus OX=10090 GN=Mrps22 PE=1 SV=1                           | 0.923333333 |
| Scrn2     | Q8VCA8 | Secernin-2 OS=Mus musculus OX=10090 GN=Scrn2 PE=1 SV=1                                                         | 0.966666667 |
| Fam160b1  | Q8CDM8 | Protein FAM160B1 OS=Mus musculus OX=10090 GN=Fam160b1 PE=1 SV=2                                                | 0.79        |
| Ston1     | Q8CDJ8 | Stonin-1 OS=Mus musculus OX=10090 GN=Ston1 PE=1 SV=2                                                           | 0.89        |
| Ddx51     | Q6P9R1 | ATP-dependent RNA helicase DDX51 OS=Mus musculus OX=10090 GN=Ddx51 PE=1 SV=1                                   | 1.003333333 |
| Mre11     | Q61216 | Double-strand break repair protein MRE11 OS=Mus musculus OX=10090 GN=Mre11 PE=1 SV=1                           | 0.88        |
| Adgrl2    | Q8JZZ7 | Adhesion G protein-coupled receptor L2 OS=Mus musculus OX=10090 GN=Adgrl2 PE=1 SV=3                            | 0.98        |
| Ints7     | Q7TQK1 | Integrator complex subunit 7 OS=Mus musculus OX=10090 GN=Ints7 PE=1 SV=1                                       | 1.033333333 |
| Pik3r4    | Q8VD65 | Phosphoinositide 3-kinase regulatory subunit 4 OS=Mus musculus OX=10090 GN=Pik3r4 PE=1 SV=3                    | 0.923333333 |
| Ddx10     | Q80Y44 | Probable ATP-dependent RNA helicase DDX10 OS=Mus musculus OX=10090 GN=Ddx10 PE=1 SV=2                          | 0.973333333 |
| Mrpl19    | Q9D338 | 39S ribosomal protein L19 mitochondrial OS=Mus musculus OX=10090 GN=Mrpl19 PE=1 SV=1                           | 1.056666667 |
| Rabep2    | Q91WG2 | Rab GTPase-binding effector protein 2 OS=Mus musculus OX=10090 GN=Rabep2 PE=1 SV=3                             | 0.84        |
| Ppp1r18   | Q8BQ30 | Phostensin OS=Mus musculus OX=10090 GN=Ppp1r18 PE=1 SV=1                                                       | 0.903333333 |
| Hist2h3c2 | P84228 | Histone H3.2 OS=Mus musculus OX=10090 GN=H3c2 PE=1 SV=2                                                        |             |
| Gspt2     | Q149F3 | Eukaryotic peptide chain release factor GTP-binding subunit ERF3B OS=Mus musculus OX=10090 GN=Gspt2 PE=1 SV=1  |             |
| Arf2      | Q8BSL7 | ADP-ribosylation factor 2 OS=Mus musculus OX=10090 GN=Arf2 PE=1 SV=2                                           | 1.73        |
| RbmX      | Q9WV02 | RNA-binding motif protein X chromosome OS=Mus musculus OX=10090 GN=RbmX PE=1 SV=1                              |             |
| Rap1a     | P62835 | Ras-related protein Rap-1A OS=Mus musculus OX=10090 GN=Rap1a PE=1 SV=1                                         | 2.203333333 |
| Arf5      | P84084 | ADP-ribosylation factor 5 OS=Mus musculus OX=10090 GN=Arf5 PE=1 SV=2                                           | 0.91        |
| Rab2a     | P53994 | Ras-related protein Rab-2A OS=Mus musculus OX=10090 GN=Rab2a PE=1 SV=1                                         | 0.876666667 |
| Cux1      | P53564 | Homeobox protein cut-like 1 OS=Mus musculus OX=10090 GN=Cux1 PE=1 SV=3                                         | 1.146666667 |
| Anp32a    | O35381 | Acidic leucine-rich nuclear phosphoprotein 32 family member A OS=Mus musculus OX=10090 GN=Anp32a PE=1 SV=1     | 0.886666667 |
| Luc7l     | Q9CYI4 | Putative RNA-binding protein Luc7-like 1 OS=Mus musculus OX=10090 GN=Luc7l PE=1 SV=2                           | 0.843333333 |
| Ythdf3    | Q8BYK6 | YTH domain-containing family protein 3 OS=Mus musculus OX=10090 GN=Ythdf3 PE=1 SV=2                            | 0.916666667 |
| Ubqln1    | Q8R317 | Ubiquilin-1 OS=Mus musculus OX=10090 GN=Ubqln1 PE=1 SV=1                                                       | 0.85        |
| Luc7l2    | Q7TNC4 | Putative RNA-binding protein Luc7-like 2 OS=Mus musculus OX=10090 GN=Luc7l2 PE=1 SV=1                          | 0.883333333 |
| Camk2d    | Q6PHZ2 | Calcium/calmodulin-dependent protein kinase type II subunit delta OS=Mus musculus OX=10090 GN=Camk2d PE=1 SV=1 | 0.75        |
| Cab39     | Q06138 | Calcium-binding protein 39 OS=Mus musculus OX=10090 GN=Cab39 PE=1 SV=2                                         | 0.826666667 |
| Nmt2      | O70311 | Glycylpeptide N-tetradecanoyltransferase 2 OS=Mus musculus OX=10090 GN=Nmt2 PE=1 SV=1                          | 0.856666667 |



|          |        |                                                                                                  |             |
|----------|--------|--------------------------------------------------------------------------------------------------|-------------|
| Clasp2   | Q8BRT1 | CLIP-associating protein 2 OS=Mus musculus OX=10090 GN=Clasp2 PE=1 SV=1                          | 0.863333333 |
| Ubqln4   | Q99NB8 | Ubiquilin-4 OS=Mus musculus OX=10090 GN=Ubqln4 PE=1 SV=1                                         | 0.833333333 |
| Chd1     | P40201 | Chromodomain-helicase-DNA-binding protein 1 OS=Mus musculus OX=10090 GN=Chd1 PE=1 SV=3           | 0.823333333 |
| Pfkf     | Q9WUA3 | ATP-dependent 6-phosphofructokinase platelet type OS=Mus musculus OX=10090 GN=Pfkf PE=1 SV=1     | 0.833333333 |
| Gnas     | Q6R0H7 | Guanine nucleotide-binding protein G(s) subunit alpha isoforms XLas OS=Mus musculus OX=10090     | 0.866666667 |
| Gnas     | P63094 | Guanine nucleotide-binding protein G(s) subunit alpha isoforms short OS=Mus musculus OX=10090    | 0.866666667 |
| Fam49b   | Q921M7 | CYFIP-related Rac1 interactor B OS=Mus musculus OX=10090 GN=Cyrib PE=1 SV=1                      | 0.936666667 |
| Cdc42    | P60766 | Cell division control protein 42 homolog OS=Mus musculus OX=10090 GN=Cdc42 PE=1 SV=2             | 0.876666667 |
| Abcb1b   | P06795 | ATP-dependent translocase ABCB1 OS=Mus musculus OX=10090 GN=Abcb1b PE=1 SV=1                     | 0.706666667 |
| Anxa11   | P97384 | Annexin A11 OS=Mus musculus OX=10090 GN=Anxa11 PE=1 SV=2                                         | 0.976666667 |
| Dync1li2 | Q6PDL0 | Cytoplasmic dynein 1 light intermediate chain 2 OS=Mus musculus OX=10090 GN=Dync1li2 PE=1 SV=1   | 0.77        |
| Arhgef25 | Q9CWR0 | Rho guanine nucleotide exchange factor 25 OS=Mus musculus OX=10090 GN=Arhgef25 PE=1 SV=1         | 1.02        |
| Ube2n    | P61089 | Ubiquitin-conjugating enzyme E2 N OS=Mus musculus OX=10090 GN=Ube2n PE=1 SV=1                    | 0.84        |
| Casp3    | P70677 | Caspase-3 OS=Mus musculus OX=10090 GN=Casp3 PE=1 SV=1                                            | 0.896666667 |
| Dnajb1   | Q9QYJ3 | DnaJ homolog subfamily B member 1 OS=Mus musculus OX=10090 GN=Dnajb1 PE=1 SV=3                   | 0.743333333 |
| Usp19    | Q3UJD6 | Ubiquitin carboxyl-terminal hydrolase 19 OS=Mus musculus OX=10090 GN=Usp19 PE=1 SV=1             | 0.813333333 |
| Acs1     | P41216 | Long-chain-fatty-acid--CoA ligase 1 OS=Mus musculus OX=10090 GN=Acs1 PE=1 SV=2                   | 0.886666667 |
| Utp15    | Q8C7V3 | U3 small nucleolar RNA-associated protein 15 homolog OS=Mus musculus OX=10090 GN=Utp15 PE=1 SV=1 | 0.996666667 |
| Prc1     | Q99K43 | Protein regulator of cytokinesis 1 OS=Mus musculus OX=10090 GN=Prc1 PE=1 SV=2                    | 0.84        |
| Chordc1  | Q9D1P4 | Cysteine and histidine-rich domain-containing protein 1 OS=Mus musculus OX=10090 GN=Chordc1      | 0.85        |
| Arhgdia  | Q99PT1 | Rho GDP-dissociation inhibitor 1 OS=Mus musculus OX=10090 GN=Arhgdia PE=1 SV=3                   | 0.863333333 |
| Psmd7    | P26516 | 26S proteasome non-ATPase regulatory subunit 7 OS=Mus musculus OX=10090 GN=Psmd7 PE=1 SV=1       | 0.88        |
| Cavin2   | Q63918 | Caveolae-associated protein 2 OS=Mus musculus OX=10090 GN=Cavin2 PE=1 SV=3                       | 0.866666667 |
|          | P10404 | MLV-related proviral Env polyprotein OS=Mus musculus OX=10090 PE=1 SV=3                          | 0.856666667 |
| Gstp1    | P19157 | Glutathione S-transferase P 1 OS=Mus musculus OX=10090 GN=Gstp1 PE=1 SV=2                        | 0.843333333 |
| Dld      | O08749 | Dihydrolipoyl dehydrogenase mitochondrial OS=Mus musculus OX=10090 GN=Dld PE=1 SV=2              | 0.916666667 |
| Erp44    | Q9D1Q6 | Endoplasmic reticulum resident protein 44 OS=Mus musculus OX=10090 GN=Erp44 PE=1 SV=1            | 0.91        |
| Lrrc59   | Q922Q8 | Leucine-rich repeat-containing protein 59 OS=Mus musculus OX=10090 GN=Lrrc59 PE=1 SV=1           | 0.903333333 |
| Tomm40   | Q9QYA2 | Mitochondrial import receptor subunit TOM40 homolog OS=Mus musculus OX=10090 GN=Tomm40           | 0.856666667 |
| Rpl17    | Q9CPR4 | 60S ribosomal protein L17 OS=Mus musculus OX=10090 GN=Rpl17 PE=1 SV=3                            | 0.916666667 |
| Tyms     | P07607 | Thymidylate synthase OS=Mus musculus OX=10090 GN=Tyms PE=1 SV=1                                  | 0.933333333 |
| Usp39    | Q3TIX9 | U4/U6.U5 tri-snRNP-associated protein 2 OS=Mus musculus OX=10090 GN=Usp39 PE=1 SV=2              | 1.023333333 |
| Vat1     | Q62465 | Synaptic vesicle membrane protein VAT-1 homolog OS=Mus musculus OX=10090 GN=Vat1 PE=1 SV=1       | 0.8         |
| Golga2   | Q921M4 | Golgin subfamily A member 2 OS=Mus musculus OX=10090 GN=Golga2 PE=1 SV=3                         | 1.096666667 |

|          |        |                                                                                                |             |
|----------|--------|------------------------------------------------------------------------------------------------|-------------|
| Nup37    | Q9CWU9 | Nucleoporin Nup37 OS=Mus musculus OX=10090 GN=Nup37 PE=1 SV=2                                  | 0.853333333 |
| Nol11    | Q8BJW5 | Nucleolar protein 11 OS=Mus musculus OX=10090 GN=Nol11 PE=2 SV=1                               | 0.956666667 |
| Psmb5    | O55234 | Proteasome subunit beta type-5 OS=Mus musculus OX=10090 GN=Psmb5 PE=1 SV=3                     | 0.91        |
| Drg1     | P32233 | Developmentally-regulated GTP-binding protein 1 OS=Mus musculus OX=10090 GN=Drg1 PE=1 SV=      | 0.913333333 |
| Tes      | P47226 | Testin OS=Mus musculus OX=10090 GN=Tes PE=1 SV=1                                               | 0.843333333 |
| Sucla2   | Q9Z2I9 | Succinate--CoA ligase [ADP-forming] subunit beta mitochondrial OS=Mus musculus OX=10090 GN=    | 0.893333333 |
| Tomm34   | Q9CYG7 | Mitochondrial import receptor subunit TOM34 OS=Mus musculus OX=10090 GN=Tomm34 PE=1 SV=        | 0.843333333 |
| Ptpn1    | P35821 | Tyrosine-protein phosphatase non-receptor type 1 OS=Mus musculus OX=10090 GN=Ptpn1 PE=1 SV=    | 1.01        |
| Cnot10   | Q8BH15 | CCR4-NOT transcription complex subunit 10 OS=Mus musculus OX=10090 GN=Cnot10 PE=1 SV=1         | 1.033333333 |
| Trrap    | Q80YV3 | Transformation/transcription domain-associated protein OS=Mus musculus OX=10090 GN=Trrap P=    | 1.066666667 |
| Dlst     | Q9D2G2 | Dihydrolipoyllysine-residue succinyltransferase component of 2-oxoglutarate dehydrogenase comp | 0.886666667 |
| Dus3l    | Q91X11 | tRNA-dihydrouridine(47) synthase [NAD(P)(+)]-like OS=Mus musculus OX=10090 GN=Dus3l PE=1 SV=   | 0.876666667 |
| Svil     | Q8K4L3 | Supervillin OS=Mus musculus OX=10090 GN=Svil PE=1 SV=1                                         | 0.856666667 |
| Add1     | Q9QYC0 | Alpha-adducin OS=Mus musculus OX=10090 GN=Add1 PE=1 SV=2                                       | 0.923333333 |
| Cherp    | Q8CGZ0 | Calcium homeostasis endoplasmic reticulum protein OS=Mus musculus OX=10090 GN=Cherp PE=1       | 0.83        |
| Tgfb1i1  | Q62219 | Transforming growth factor beta-1-induced transcript 1 protein OS=Mus musculus OX=10090 GN=T   | 0.966666667 |
| Mrps9    | Q9D7N3 | 28S ribosomal protein S9 mitochondrial OS=Mus musculus OX=10090 GN=Mrps9 PE=1 SV=3             | 0.91        |
| Ankle2   | Q6P1H6 | Ankyrin repeat and LEM domain-containing protein 2 OS=Mus musculus OX=10090 GN=Ankle2 PE=      | 0.786666667 |
| Ccdc22   | Q9JIG7 | Coiled-coil domain-containing protein 22 OS=Mus musculus OX=10090 GN=Ccdc22 PE=1 SV=1          | 0.92        |
| Rps5     | P97461 | 40S ribosomal protein S5 OS=Mus musculus OX=10090 GN=Rps5 PE=1 SV=3                            | 0.886666667 |
| Aldh3a2  | P47740 | Aldehyde dehydrogenase family 3 member A2 OS=Mus musculus OX=10090 GN=Aldh3a2 PE=1 SV=2        | 0.92        |
| Dpp9     | Q8BVG4 | Dipeptidyl peptidase 9 OS=Mus musculus OX=10090 GN=Dpp9 PE=1 SV=2                              | 0.883333333 |
| Atp6v1h  | Q8BVE3 | V-type proton ATPase subunit H OS=Mus musculus OX=10090 GN=Atp6v1h PE=1 SV=1                   | 0.986666667 |
| Cdc16    | Q8R349 | Cell division cycle protein 16 homolog OS=Mus musculus OX=10090 GN=Cdc16 PE=1 SV=1             | 0.926666667 |
| Nadk2    | Q8C5H8 | NAD kinase 2 mitochondrial OS=Mus musculus OX=10090 GN=Nadk2 PE=1 SV=2                         | 0.996666667 |
| Aatf     | Q9JKX4 | Protein AATF OS=Mus musculus OX=10090 GN=Aatf PE=1 SV=1                                        | 0.953333333 |
| Stub1    | Q9WUD1 | STIP1 homology and U box-containing protein 1 OS=Mus musculus OX=10090 GN=Stub1 PE=1 SV=1      | 0.95        |
| Prpf3    | Q922U1 | U4/U6 small nuclear ribonucleoprotein Prp3 OS=Mus musculus OX=10090 GN=Prpf3 PE=1 SV=1         | 0.836666667 |
| Aarsd1   | Q3THG9 | Alanyl-tRNA editing protein Aarsd1 OS=Mus musculus OX=10090 GN=Aarsd1 PE=1 SV=2                | 0.82        |
| Zmpste24 | Q80W54 | CAAX prenyl protease 1 homolog OS=Mus musculus OX=10090 GN=Zmpste24 PE=1 SV=2                  | 0.96        |
| Snx7     | Q9CY18 | Sorting nexin-7 OS=Mus musculus OX=10090 GN=Snx7 PE=1 SV=1                                     | 0.976666667 |
| Mad1l1   | Q9WTX8 | Mitotic spindle assembly checkpoint protein MAD1 OS=Mus musculus OX=10090 GN=Mad1l1 PE=1       | 0.91        |
| Raly     | Q64012 | RNA-binding protein Raly OS=Mus musculus OX=10090 GN=Raly PE=1 SV=3                            | 0.826666667 |
| Gusb     | P12265 | Beta-glucuronidase OS=Mus musculus OX=10090 GN=Gusb PE=1 SV=2                                  | 0.836666667 |

|         |        |                                                                                                      |             |
|---------|--------|------------------------------------------------------------------------------------------------------|-------------|
| Diaph3  | Q9Z207 | Protein diaphanous homolog 3 OS=Mus musculus OX=10090 GN=Diaph3 PE=1 SV=1                            | 0.89        |
| Heatr5b | Q8C547 | HEAT repeat-containing protein 5B OS=Mus musculus OX=10090 GN=Heatr5b PE=1 SV=3                      | 0.79        |
| Rbm19   | Q8R3C6 | Probable RNA-binding protein 19 OS=Mus musculus OX=10090 GN=Rbm19 PE=1 SV=1                          | 0.916666667 |
| Noc2l   | Q9WV70 | Nucleolar complex protein 2 homolog OS=Mus musculus OX=10090 GN=Noc2l PE=1 SV=2                      | 0.866666667 |
| Ap3m1   | Q9JKC8 | AP-3 complex subunit mu-1 OS=Mus musculus OX=10090 GN=Ap3m1 PE=1 SV=1                                | 0.856666667 |
| Plbd2   | Q3TCN2 | Putative phospholipase B-like 2 OS=Mus musculus OX=10090 GN=Plbd2 PE=1 SV=2                          | 0.853333333 |
| Gtf3c1  | Q8K284 | General transcription factor 3C polypeptide 1 OS=Mus musculus OX=10090 GN=Gtf3c1 PE=1 SV=2           | 0.786666667 |
| Sntb2   | Q61235 | Beta-2-syntrophin OS=Mus musculus OX=10090 GN=Sntb2 PE=1 SV=2                                        | 0.76        |
| Syne3   | Q4FZC9 | Nesprin-3 OS=Mus musculus OX=10090 GN=Syne3 PE=1 SV=1                                                | 0.916666667 |
| Glo1    | Q9CPU0 | Lactoylglutathione lyase OS=Mus musculus OX=10090 GN=Glo1 PE=1 SV=3                                  | 0.876666667 |
| Smg1    | Q8BKX6 | Serine/threonine-protein kinase SMG1 OS=Mus musculus OX=10090 GN=Smg1 PE=1 SV=3                      | 0.923333333 |
| Stau1   | Q9Z108 | Double-stranded RNA-binding protein Staufen homolog 1 OS=Mus musculus OX=10090 GN=Stau1 P            | 0.923333333 |
| Dek     | Q7TNV0 | Protein DEK OS=Mus musculus OX=10090 GN=Dek PE=1 SV=1                                                | 0.873333333 |
| Cwf19l1 | Q8CI33 | CWF19-like protein 1 OS=Mus musculus OX=10090 GN=Cwf19l1 PE=1 SV=2                                   | 1.04        |
| Trmt1l  | A2RSY6 | TRMT1-like protein OS=Mus musculus OX=10090 GN=Trmt1l PE=1 SV=1                                      | 1.046666667 |
| Dhx30   | Q99PU8 | ATP-dependent RNA helicase DHX30 OS=Mus musculus OX=10090 GN=Dhx30 PE=1 SV=1                         | 1.073333333 |
| Srgap2  | Q91Z67 | SLIT-ROBO Rho GTPase-activating protein 2 OS=Mus musculus OX=10090 GN=Srgap2 PE=1 SV=2               | 0.986666667 |
| Prmt7   | Q922X9 | Protein arginine N-methyltransferase 7 OS=Mus musculus OX=10090 GN=Prmt7 PE=1 SV=1                   | 1.056666667 |
| Elp3    | Q9CZX0 | Elongator complex protein 3 OS=Mus musculus OX=10090 GN=Elp3 PE=1 SV=1                               | 0.926666667 |
| Letm1   | Q9Z210 | Mitochondrial proton/calcium exchanger protein OS=Mus musculus OX=10090 GN=Letm1 PE=1 SV             | 0.876666667 |
| Crnk1l  | P63154 | Crooked neck-like protein 1 OS=Mus musculus OX=10090 GN=Crnk1l PE=1 SV=1                             | 0.9         |
| Gphn    | Q8BUV3 | Gephyrin OS=Mus musculus OX=10090 GN=Gphn PE=1 SV=2                                                  | 0.92        |
| Ppwd1   | Q8CEC6 | Peptidylprolyl isomerase domain and WD repeat-containing protein 1 OS=Mus musculus OX=10090 GN=Ppwd1 | 1.103333333 |
| Upf2    | A2AT37 | Regulator of nonsense transcripts 2 OS=Mus musculus OX=10090 GN=Upf2 PE=1 SV=1                       | 0.93        |
| Tbrg4   | Q91YM4 | FAST kinase domain-containing protein 4 OS=Mus musculus OX=10090 GN=Tbrg4 PE=1 SV=1                  | 0.873333333 |
| Dtymk   | P97930 | Thymidylate kinase OS=Mus musculus OX=10090 GN=Dtymk PE=1 SV=2                                       | 0.876666667 |
| Rps16   | P14131 | 40S ribosomal protein S16 OS=Mus musculus OX=10090 GN=Rps16 PE=1 SV=4                                | 0.923333333 |
| Col3a1  | P08121 | Collagen alpha-1(III) chain OS=Mus musculus OX=10090 GN=Col3a1 PE=1 SV=4                             | 0.853333333 |
| Ada     | P03958 | Adenosine deaminase OS=Mus musculus OX=10090 GN=Ada PE=1 SV=3                                        | 0.893333333 |
| Galnt7  | Q80VA0 | N-acetylgalactosaminyltransferase 7 OS=Mus musculus OX=10090 GN=Galnt7 PE=1 SV=2                     | 0.846666667 |
| Mlkl    | Q9D2Y4 | Mixed lineage kinase domain-like protein OS=Mus musculus OX=10090 GN=Mlkl PE=1 SV=1                  | 0.79        |
| Arf1    | P84078 | ADP-ribosylation factor 1 OS=Mus musculus OX=10090 GN=Arf1 PE=1 SV=2                                 | 0.873333333 |
| Smarca1 | Q6PGB8 | Probable global transcription activator SNF2L1 OS=Mus musculus OX=10090 GN=Smarca1 PE=1 SV: 0        |             |
| MyI9    | Q9CQ19 | Myosin regulatory light polypeptide 9 OS=Mus musculus OX=10090 GN=MyI9 PE=1 SV=3                     | 0.903333333 |

|          |        |                                                                                                                |             |
|----------|--------|----------------------------------------------------------------------------------------------------------------|-------------|
| Rps27a   | P62983 | Ubiquitin-40S ribosomal protein S27a OS=Mus musculus OX=10090 GN=Rps27a PE=1 SV=2                              | 0.873333333 |
| Mnda     | P0DOV1 | Interferon-activable protein 205-B OS=Mus musculus OX=10090 GN=Mnda PE=1 SV=1                                  | 0.87        |
| Gnb1     | P62874 | Guanine nucleotide-binding protein G(I)/G(S)/G(T) subunit beta-1 OS=Mus musculus OX=10090 GN=Gnb1 PE=1 SV=1    | 0.95        |
| Gnai3    | Q9DC51 | Guanine nucleotide-binding protein G(i) subunit alpha OS=Mus musculus OX=10090 GN=Gnai3 PE=1 SV=1              | 0.886666667 |
| Rab1A    | P62821 | Ras-related protein Rab-1A OS=Mus musculus OX=10090 GN=Rab1A PE=1 SV=3                                         | 0.89        |
| Camk2g   | Q923T9 | Calcium/calmodulin-dependent protein kinase type II subunit gamma OS=Mus musculus OX=10090 GN=Camk2g PE=1 SV=1 | 0.856666667 |
| Eif4g3   | Q80XI3 | Eukaryotic translation initiation factor 4 gamma 3 OS=Mus musculus OX=10090 GN=Eif4g3 PE=1 SV=1                | 1.29        |
| Ywhag    | P61982 | 14-3-3 protein gamma OS=Mus musculus OX=10090 GN=Ywhag PE=1 SV=2                                               | 0.93        |
| Src      | P05480 | Neuronal proto-oncogene tyrosine-protein kinase Src OS=Mus musculus OX=10090 GN=Src PE=1 SV=1                  | 0.866666667 |
| Tbl1x    | Q9QXE7 | F-box-like/WD repeat-containing protein TBL1X OS=Mus musculus OX=10090 GN=Tbl1x PE=1 SV=2                      | 0.836666667 |
| Sfxn1    | Q99JR1 | Sideroflexin-1 OS=Mus musculus OX=10090 GN=Sfxn1 PE=1 SV=3                                                     | 0.87        |
| Kpna3    | O35344 | Importin subunit alpha-4 OS=Mus musculus OX=10090 GN=Kpna3 PE=1 SV=1                                           | 0.873333333 |
| Rad23b   | P54728 | UV excision repair protein RAD23 homolog B OS=Mus musculus OX=10090 GN=Rad23b PE=1 SV=2                        | 0.843333333 |
| Septin10 | Q8C650 | Septin-10 OS=Mus musculus OX=10090 GN=Septin10 PE=1 SV=1                                                       | 1.083333333 |
| Rock1    | P70335 | Rho-associated protein kinase 1 OS=Mus musculus OX=10090 GN=Rock1 PE=1 SV=1                                    | 0.883333333 |
| Fxr2     | Q9WVR4 | Fragile X mental retardation syndrome-related protein 2 OS=Mus musculus OX=10090 GN=Fxr2 PE=1 SV=1             | 0.923333333 |
| Nek7     | Q9ES74 | Serine/threonine-protein kinase Nek7 OS=Mus musculus OX=10090 GN=Nek7 PE=1 SV=1                                | 0.85        |
| Stag1    | Q9D3E6 | Cohesin subunit SA-1 OS=Mus musculus OX=10090 GN=Stag1 PE=1 SV=3                                               | 1.576666667 |
| Stk24    | Q99KH8 | Serine/threonine-protein kinase 24 OS=Mus musculus OX=10090 GN=Stk24 PE=1 SV=1                                 | 0.98        |
| Hnrnpd   | Q60668 | Heterogeneous nuclear ribonucleoprotein D0 OS=Mus musculus OX=10090 GN=Hnrnpd PE=1 SV=2                        | 0.86        |
| Hnrnpdl  | Q9Z130 | Heterogeneous nuclear ribonucleoprotein D-like OS=Mus musculus OX=10090 GN=Hnrnpdl PE=1 SV=1                   | 0.9         |
| Srpk1    | O70551 | SRSF protein kinase 1 OS=Mus musculus OX=10090 GN=Srpk1 PE=1 SV=2                                              | 0.906666667 |
| Ppm1a    | P49443 | Protein phosphatase 1A OS=Mus musculus OX=10090 GN=Ppm1a PE=1 SV=1                                             | 0.793333333 |
| Nap1l4   | Q78ZA7 | Nucleosome assembly protein 1-like 4 OS=Mus musculus OX=10090 GN=Nap1l4 PE=1 SV=1                              | 0.796666667 |
| Rab14    | Q91V41 | Ras-related protein Rab-14 OS=Mus musculus OX=10090 GN=Rab14 PE=1 SV=3                                         | 0.873333333 |
| Cpne1    | Q8C166 | Copine-1 OS=Mus musculus OX=10090 GN=Cpne1 PE=1 SV=1                                                           | 0.913333333 |
| Nab2     | Q61127 | NGFI-A-binding protein 2 OS=Mus musculus OX=10090 GN=Nab2 PE=1 SV=2                                            | 0.693333333 |
| Akr1a1   | Q9JII6 | Aldo-keto reductase family 1 member A1 OS=Mus musculus OX=10090 GN=Akr1a1 PE=1 SV=3                            | 0.91        |
| Rab18    | P35293 | Ras-related protein Rab-18 OS=Mus musculus OX=10090 GN=Rab18 PE=1 SV=2                                         | 0.89        |
| Coro1c   | Q9WUM4 | Coronin-1C OS=Mus musculus OX=10090 GN=Coro1c PE=1 SV=2                                                        | 0.893333333 |
| Snx6     | Q6P8X1 | Sorting nexin-6 OS=Mus musculus OX=10090 GN=Snx6 PE=1 SV=2                                                     | 0.796666667 |
| Arfgap3  | Q9D8S3 | ADP-ribosylation factor GTPase-activating protein 3 OS=Mus musculus OX=10090 GN=Arfgap3 PE=1 SV=1              | 0.923333333 |
| Taok1    | Q5F2E8 | Serine/threonine-protein kinase TAO1 OS=Mus musculus OX=10090 GN=Taok1 PE=1 SV=1                               | 0.993333333 |
| Prrc2b   | Q7TPM1 | Protein PRRC2B OS=Mus musculus OX=10090 GN=Prrc2b PE=1 SV=1                                                    | 0.8         |

|          |        |                                                                                                                   |             |
|----------|--------|-------------------------------------------------------------------------------------------------------------------|-------------|
| Mapk14   | P47811 | Mitogen-activated protein kinase 14 OS=Mus musculus OX=10090 GN=Mapk14 PE=1 SV=3                                  | 0.903333333 |
| Ncor2    | Q9WU42 | Nuclear receptor corepressor 2 OS=Mus musculus OX=10090 GN=Ncor2 PE=1 SV=3                                        | 0.863333333 |
| Dync1i2  | O88487 | Cytoplasmic dynein 1 intermediate chain 2 OS=Mus musculus OX=10090 GN=Dync1i2 PE=1 SV=1                           | 0.826666667 |
| Tardbp   | Q921F2 | TAR DNA-binding protein 43 OS=Mus musculus OX=10090 GN=Tardbp PE=1 SV=1                                           | 0.853333333 |
| Dnpep    | Q9Z2W0 | Aspartyl aminopeptidase OS=Mus musculus OX=10090 GN=Dnpep PE=1 SV=2                                               | 0.823333333 |
| Caprin1  | Q60865 | Caprin-1 OS=Mus musculus OX=10090 GN=Caprin1 PE=1 SV=2                                                            | 0.84        |
| Acat1    | Q8QZT1 | Acetyl-CoA acetyltransferase mitochondrial OS=Mus musculus OX=10090 GN=Acat1 PE=1 SV=1                            | 0.856666667 |
| Etfa     | Q99LC5 | Electron transfer flavoprotein subunit alpha mitochondrial OS=Mus musculus OX=10090 GN=Etfa P                     | 0.866666667 |
| Tmem43   | Q9DBS1 | Transmembrane protein 43 OS=Mus musculus OX=10090 GN=Tmem43 PE=1 SV=1                                             | 0.836666667 |
| Psma7    | Q9Z2U0 | Proteasome subunit alpha type-7 OS=Mus musculus OX=10090 GN=Psma7 PE=1 SV=1                                       | 0.86        |
| Fam91a1  | Q3UVG3 | Protein FAM91A1 OS=Mus musculus OX=10090 GN=Fam91a1 PE=1 SV=1                                                     | 0.94        |
| Aimp1    | P31230 | Aminoacyl tRNA synthase complex-interacting multifunctional protein 1 OS=Mus musculus OX=10090 GN=Aimp1 PE=1 SV=1 | 0.856666667 |
| Ranbp1   | P34022 | Ran-specific GTPase-activating protein OS=Mus musculus OX=10090 GN=Ranbp1 PE=1 SV=2                               | 0.843333333 |
| Otub1    | Q7TQI3 | Ubiquitin thioesterase OTUB1 OS=Mus musculus OX=10090 GN=Otub1 PE=1 SV=2                                          | 0.893333333 |
| Myl6     | Q60605 | Myosin light polypeptide 6 OS=Mus musculus OX=10090 GN=Myl6 PE=1 SV=3                                             | 0.893333333 |
| Adss2    | P46664 | Adenylosuccinate synthetase isozyme 2 OS=Mus musculus OX=10090 GN=Adss2 PE=1 SV=2                                 | 0.903333333 |
| Pacsin2  | Q9WVE8 | Protein kinase C and casein kinase substrate in neurons protein 2 OS=Mus musculus OX=10090 GN=Pacsin2 PE=1 SV=1   | 0.853333333 |
| Ilf2     | Q9CXY6 | Interleukin enhancer-binding factor 2 OS=Mus musculus OX=10090 GN=Ilf2 PE=1 SV=1                                  | 0.87        |
| Btf3     | Q64152 | Transcription factor BTF3 OS=Mus musculus OX=10090 GN=Btf3 PE=1 SV=3                                              | 0.843333333 |
| Mdh1     | P14152 | Malate dehydrogenase cytoplasmic OS=Mus musculus OX=10090 GN=Mdh1 PE=1 SV=3                                       | 0.88        |
| Emd      | O08579 | Emerin OS=Mus musculus OX=10090 GN=Emd PE=1 SV=1                                                                  | 0.936666667 |
| Cops5    | O35864 | COP9 signalosome complex subunit 5 OS=Mus musculus OX=10090 GN=Cops5 PE=1 SV=3                                    | 0.873333333 |
| Clint1   | Q99KN9 | Clathrin interactor 1 OS=Mus musculus OX=10090 GN=Clint1 PE=1 SV=2                                                | 0.856666667 |
| Timeless | Q9R1X4 | Protein timeless homolog OS=Mus musculus OX=10090 GN=Timeless PE=1 SV=3                                           | 0.93        |
| Pcmt1    | P23506 | Protein-L-isoaspartate(D-aspartate) O-methyltransferase OS=Mus musculus OX=10090 GN=Pcmt1 P                       | 0.85        |
| Mri1     | Q9CQT1 | Methylthioribose-1-phosphate isomerase OS=Mus musculus OX=10090 GN=Mri1 PE=1 SV=1                                 | 0.933333333 |
| Nisch    | Q80TM9 | Nischarin OS=Mus musculus OX=10090 GN=Nisch PE=1 SV=2                                                             | 1.093333333 |
| Lims1    | Q99JW4 | LIM and senescent cell antigen-like-containing domain protein 1 OS=Mus musculus OX=10090 GN=Lims1 PE=1 SV=1       | 0.856666667 |
| Gmds     | Q8K0C9 | GDP-mannose 4 6 dehydratase OS=Mus musculus OX=10090 GN=Gmds PE=1 SV=1                                            | 0.916666667 |
| Aip      | O08915 | AH receptor-interacting protein OS=Mus musculus OX=10090 GN=Aip PE=1 SV=1                                         | 0.88        |
| Lemd3    | Q9WU40 | Inner nuclear membrane protein Man1 OS=Mus musculus OX=10090 GN=Lemd3 PE=1 SV=2                                   | 0.803333333 |
| Mat2a    | Q3THS6 | S-adenosylmethionine synthase isoform type-2 OS=Mus musculus OX=10090 GN=Mat2a PE=1 SV=2                          | 0.92        |
| Nploc4   | P60670 | Nuclear protein localization protein 4 homolog OS=Mus musculus OX=10090 GN=Nploc4 PE=1 SV=1                       | 0.826666667 |
| Adk      | P55264 | Adenosine kinase OS=Mus musculus OX=10090 GN=Adk PE=1 SV=2                                                        | 0.903333333 |



|         |        |                                                                                                                |            |
|---------|--------|----------------------------------------------------------------------------------------------------------------|------------|
| Rfc1    | P35601 | Replication factor C subunit 1 OS=Mus musculus OX=10090 GN=Rfc1 PE=1 SV=2                                      | 0.93       |
| Prim2   | P33610 | DNA primase large subunit OS=Mus musculus OX=10090 GN=Prim2 PE=1 SV=1                                          | 0.92       |
| Cops6   | O88545 | COP9 signalosome complex subunit 6 OS=Mus musculus OX=10090 GN=Cops6 PE=1 SV=1                                 | 0.94       |
| Ctcf    | Q61164 | Transcriptional repressor CTCF OS=Mus musculus OX=10090 GN=Ctcf PE=1 SV=2                                      | 0.91       |
| Pcolce  | Q61398 | Procollagen C-endopeptidase enhancer 1 OS=Mus musculus OX=10090 GN=Pcolce PE=1 SV=2                            | 0.84       |
| Tubgcp3 | P58854 | Gamma-tubulin complex component 3 OS=Mus musculus OX=10090 GN=Tubgcp3 PE=1 SV=2                                | 0.87666667 |
| Aebp1   | Q640N1 | Adipocyte enhancer-binding protein 1 OS=Mus musculus OX=10090 GN=Aebp1 PE=1 SV=1                               | 0.76       |
| Cpsf3   | Q9QXK7 | Cleavage and polyadenylation specificity factor subunit 3 OS=Mus musculus OX=10090 GN=Cpsf3 PE=1 SV=1          | 0.98333333 |
| Ctnnbl1 | Q9CWL8 | Beta-catenin-like protein 1 OS=Mus musculus OX=10090 GN=Ctnnbl1 PE=1 SV=1                                      | 0.95666667 |
| Sf1     | Q64213 | Splicing factor 1 OS=Mus musculus OX=10090 GN=Sf1 PE=1 SV=6                                                    | 0.75       |
| Lbr     | Q3U9G9 | Delta(14)-sterol reductase LBR OS=Mus musculus OX=10090 GN=Lbr PE=1 SV=2                                       | 0.87       |
| Actl6a  | Q9Z2N8 | Actin-like protein 6A OS=Mus musculus OX=10090 GN=Actl6a PE=1 SV=2                                             | 0.88666667 |
| Fndc3a  | Q8BX90 | Fibronectin type-III domain-containing protein 3A OS=Mus musculus OX=10090 GN=Fndc3a PE=1 SV=1                 | 0.71333333 |
| Eif2d   | Q61211 | Eukaryotic translation initiation factor 2D OS=Mus musculus OX=10090 GN=Eif2d PE=1 SV=3                        | 0.81       |
| Arhgef1 | Q61210 | Rho guanine nucleotide exchange factor 1 OS=Mus musculus OX=10090 GN=Arhgef1 PE=1 SV=2                         | 0.82666667 |
| Osbpl3  | Q9DBS9 | Oxysterol-binding protein-related protein 3 OS=Mus musculus OX=10090 GN=Osbpl3 PE=1 SV=2                       | 0.88       |
| Pspc1   | Q8R326 | Paraspeckle component 1 OS=Mus musculus OX=10090 GN=Pspc1 PE=1 SV=1                                            | 0.87666667 |
| Eps15   | P42567 | Epidermal growth factor receptor substrate 15 OS=Mus musculus OX=10090 GN=Eps15 PE=1 SV=1                      | 0.80333333 |
| Pmpcb   | Q9CXT8 | Mitochondrial-processing peptidase subunit beta OS=Mus musculus OX=10090 GN=Pmpcb PE=1 SV=1                    | 0.83333333 |
| Col6a2  | Q02788 | Collagen alpha-2(VI) chain OS=Mus musculus OX=10090 GN=Col6a2 PE=1 SV=3                                        | 0.93       |
| Gys1    | Q9Z1E4 | Glycogen [starch] synthase muscle OS=Mus musculus OX=10090 GN=Gys1 PE=1 SV=2                                   | 0.89333333 |
| Atad2   | Q8CDM1 | ATPase family AAA domain-containing protein 2 OS=Mus musculus OX=10090 GN=Atad2 PE=1 SV=1                      | 0.97       |
| P3h3    | Q8CG70 | Prolyl 3-hydroxylase 3 OS=Mus musculus OX=10090 GN=P3h3 PE=1 SV=1                                              | 0.82666667 |
| Carm1   | Q9WVG6 | Histone-arginine methyltransferase CARM1 OS=Mus musculus OX=10090 GN=Carm1 PE=1 SV=2                           | 0.89666667 |
| Lman2   | Q9DBH5 | Vesicular integral-membrane protein VIP36 OS=Mus musculus OX=10090 GN=Lman2 PE=1 SV=2                          | 0.9        |
| Asna1   | O54984 | ATPase GET3 OS=Mus musculus OX=10090 GN=Get3 PE=1 SV=2                                                         | 0.87666667 |
| Mfge8   | P21956 | Lactadherin OS=Mus musculus OX=10090 GN=Mfge8 PE=1 SV=3                                                        | 0.89666667 |
| Ptcd3   | Q14C51 | Pentatricopeptide repeat domain-containing protein 3 mitochondrial OS=Mus musculus OX=10090 GN=Ptcd3 PE=1 SV=1 | 0.83666667 |
| Ngf     | Q8CHT1 | Ephexin-1 OS=Mus musculus OX=10090 GN=Ngf PE=1 SV=1                                                            | 0.79333333 |
| Noc3l   | Q8VI84 | Nucleolar complex protein 3 homolog OS=Mus musculus OX=10090 GN=Noc3l PE=2 SV=2                                | 0.96       |
| Ppp5c   | Q60676 | Serine/threonine-protein phosphatase 5 OS=Mus musculus OX=10090 GN=Ppp5c PE=1 SV=3                             | 1.01333333 |
| Xrcc5   | P27641 | X-ray repair cross-complementing protein 5 OS=Mus musculus OX=10090 GN=Xrcc5 PE=1 SV=4                         | 0.84       |
| Nol10   | Q5RJG1 | Nucleolar protein 10 OS=Mus musculus OX=10090 GN=Nol10 PE=2 SV=1                                               | 0.98333333 |
| Gtpbp1  | O08582 | GTP-binding protein 1 OS=Mus musculus OX=10090 GN=Gtpbp1 PE=1 SV=2                                             | 0.97333333 |

|          |        |                                                                                                                                             |            |
|----------|--------|---------------------------------------------------------------------------------------------------------------------------------------------|------------|
| Phldb1   | Q6PDH0 | Pleckstrin homology-like domain family B member 1 OS=Mus musculus OX=10090 GN=Phldb1 PE=1 SV=1                                              | 0.82       |
| Sec16a   | E9QAT4 | Protein transport protein Sec16A OS=Mus musculus OX=10090 GN=Sec16a PE=1 SV=1                                                               | 0.87666667 |
| Vcpip1   | Q8CDG3 | Deubiquitinating protein VCIP135 OS=Mus musculus OX=10090 GN=Vcpip1 PE=1 SV=1                                                               | 0.87       |
| Ints1    | Q6P4S8 | Integrator complex subunit 1 OS=Mus musculus OX=10090 GN=Ints1 PE=1 SV=2                                                                    | 1.09666667 |
| Rps11    | P62281 | 40S ribosomal protein S11 OS=Mus musculus OX=10090 GN=Rps11 PE=1 SV=3                                                                       | 0.92666667 |
| Gnl1     | P36916 | Guanine nucleotide-binding protein-like 1 OS=Mus musculus OX=10090 GN=Gnl1 PE=1 SV=4                                                        | 0.84666667 |
| Trim47   | Q8C0E3 | E3 ubiquitin-protein ligase TRIM47 OS=Mus musculus OX=10090 GN=Trim47 PE=1 SV=2                                                             | 1.06666667 |
| Asl      | Q91YI0 | Argininosuccinate lyase OS=Mus musculus OX=10090 GN=Asl PE=1 SV=1                                                                           | 0.81666667 |
| Xrcc6    | P23475 | X-ray repair cross-complementing protein 6 OS=Mus musculus OX=10090 GN=Xrcc6 PE=1 SV=5                                                      | 0.73333333 |
| Ddx47    | Q9CWX9 | Probable ATP-dependent RNA helicase DDX47 OS=Mus musculus OX=10090 GN=Ddx47 PE=2 SV=2                                                       | 0.96       |
| Ccdc93   | Q7TQK5 | Coiled-coil domain-containing protein 93 OS=Mus musculus OX=10090 GN=Ccdc93 PE=1 SV=1                                                       | 0.88333333 |
| Acads    | Q07417 | Short-chain specific acyl-CoA dehydrogenase mitochondrial OS=Mus musculus OX=10090 GN=Acad                                                  | 0.91       |
| Pold2    | O35654 | DNA polymerase delta subunit 2 OS=Mus musculus OX=10090 GN=Pold2 PE=1 SV=2                                                                  | 0.81666667 |
| Dcaf8    | Q8N7N5 | DDB1- and CUL4-associated factor 8 OS=Mus musculus OX=10090 GN=Dcaf8 PE=1 SV=1                                                              | 0.93333333 |
| Zc3h11a  | Q6NZF1 | Zinc finger CCCH domain-containing protein 11A OS=Mus musculus OX=10090 GN=Zc3h11a PE=1 SV=1                                                | 0.89       |
| Ebna1bp2 | Q9D903 | Probable rRNA-processing protein EBP2 OS=Mus musculus OX=10090 GN=Ebna1bp2 PE=2 SV=1                                                        | 0.87333333 |
| Pgm3     | Q9CYR6 | Phosphoacetylglucosamine mutase OS=Mus musculus OX=10090 GN=Pgm3 PE=1 SV=1                                                                  | 0.93333333 |
| Smarce1  | O54941 | SWI/SNF-related matrix-associated actin-dependent regulator of chromatin subfamily E member 1 OS=Mus musculus OX=10090 GN=Smarce1 PE=1 SV=1 | 0.78333333 |
| Lig3     | P97386 | DNA ligase 3 OS=Mus musculus OX=10090 GN=Lig3 PE=1 SV=2                                                                                     | 0.98666667 |
| Appl1    | Q8K3H0 | DCC-interacting protein 13-alpha OS=Mus musculus OX=10090 GN=Appl1 PE=1 SV=1                                                                | 0.88333333 |
| Eif2b4   | Q61749 | Translation initiation factor eIF-2B subunit delta OS=Mus musculus OX=10090 GN=Eif2b4 PE=1 SV=1                                             | 0.84       |
| Eml1     | Q05BC3 | Echinoderm microtubule-associated protein-like 1 OS=Mus musculus OX=10090 GN=Eml1 PE=1 SV=1                                                 | 0.83666667 |
| Supv3l1  | Q80YD1 | ATP-dependent RNA helicase SUPV3L1 mitochondrial OS=Mus musculus OX=10090 GN=Supv3l1 PE=1 SV=1                                              | 0.81666667 |
| Ttc27    | Q8CD92 | Tetratricopeptide repeat protein 27 OS=Mus musculus OX=10090 GN=Ttc27 PE=1 SV=2                                                             | 0.85       |
| Eif2b5   | Q8CHW4 | Translation initiation factor eIF-2B subunit epsilon OS=Mus musculus OX=10090 GN=Eif2b5 PE=1 SV=1                                           | 0.83333333 |
| Sec14l1  | A8Y5H7 | SEC14-like protein 1 OS=Mus musculus OX=10090 GN=Sec14l1 PE=1 SV=1                                                                          | 1.06       |
| Ppp2ca   | P63330 | Serine/threonine-protein phosphatase 2A catalytic subunit alpha isoform OS=Mus musculus OX=10090 GN=Ppp2ca PE=1 SV=1                        | 0.84666667 |
| Ppp2cb   | P62715 | Serine/threonine-protein phosphatase 2A catalytic subunit beta isoform OS=Mus musculus OX=10090 GN=Ppp2cb PE=1 SV=1                         | 1.08       |
| Acacb    | E9Q4Z2 | Acetyl-CoA carboxylase 2 OS=Mus musculus OX=10090 GN=Acacb PE=1 SV=1                                                                        | 0.59333333 |
| Atp1a2   | Q6PIE5 | Sodium/potassium-transporting ATPase subunit alpha-2 OS=Mus musculus OX=10090 GN=Atp1a2 PE=1 SV=1                                           | 0.84       |
| Ppp1cc   | P63087 | Serine/threonine-protein phosphatase PP1-gamma catalytic subunit OS=Mus musculus OX=10090 GN=Ppp1cc PE=1 SV=1                               | 0.94333333 |
| Myl12b   | Q3THE2 | Myosin regulatory light chain 12B OS=Mus musculus OX=10090 GN=Myl12b PE=1 SV=2                                                              | 0.91666667 |
| Septin6  | Q9R1T4 | Septin-6 OS=Mus musculus OX=10090 GN=Septin6 PE=1 SV=4                                                                                      | 1.10333333 |
| Rap1b    | Q99JI6 | Ras-related protein Rap-1b OS=Mus musculus OX=10090 GN=Rap1b PE=1 SV=2                                                                      | 0.86666667 |

|          |        |                                                                                                |             |
|----------|--------|------------------------------------------------------------------------------------------------|-------------|
| Ppp2r2d  | Q925E7 | Serine/threonine-protein phosphatase 2A 55 kDa regulatory subunit B delta isoform OS=Mus muscu | 9.945       |
| Hdac2    | P70288 | Histone deacetylase 2 OS=Mus musculus OX=10090 GN=Hdac2 PE=1 SV=1                              | 0.853333333 |
| Ctbp1    | O88712 | C-terminal-binding protein 1 OS=Mus musculus OX=10090 GN=Ctbp1 PE=1 SV=2                       | 0.88        |
| Brd4     | Q9ESU6 | Bromodomain-containing protein 4 OS=Mus musculus OX=10090 GN=Brd4 PE=1 SV=2                    | 1.21        |
| Ctbp2    | P56546 | C-terminal-binding protein 2 OS=Mus musculus OX=10090 GN=Ctbp2 PE=1 SV=2                       | 0.896666667 |
| Pak1     | O88643 | Serine/threonine-protein kinase PAK 1 OS=Mus musculus OX=10090 GN=Pak1 PE=1 SV=1               | 0.963333333 |
| Ywhah    | P68510 | 14-3-3 protein eta OS=Mus musculus OX=10090 GN=Ywhah PE=1 SV=2                                 | 0.883333333 |
| Hmgb2    | P30681 | High mobility group protein B2 OS=Mus musculus OX=10090 GN=Hmgb2 PE=1 SV=3                     | 0.81        |
| Slc25a13 | Q9QXX4 | Calcium-binding mitochondrial carrier protein Aralar2 OS=Mus musculus OX=10090 GN=Slc25a13     | 0.946666667 |
| Prkar2b  | P31324 | cAMP-dependent protein kinase type II-beta regulatory subunit OS=Mus musculus OX=10090 GN=P    | 0.86        |
| Capza2   | P47754 | F-actin-capping protein subunit alpha-2 OS=Mus musculus OX=10090 GN=Capza2 PE=1 SV=3           | 0.94        |
| Mapre1   | Q61166 | Microtubule-associated protein RP/EB family member 1 OS=Mus musculus OX=10090 GN=Mapre1 F      | 0.843333333 |
| Efl1     | Q8C0D5 | Elongation factor-like GTPase 1 OS=Mus musculus OX=10090 GN=Efl1 PE=1 SV=1                     | 0.786666667 |
| Cdk4     | P30285 | Cyclin-dependent kinase 4 OS=Mus musculus OX=10090 GN=Cdk4 PE=1 SV=1                           | 0.86        |
| Impdh1   | P50096 | Inosine-5'-monophosphate dehydrogenase 1 OS=Mus musculus OX=10090 GN=Impdh1 PE=1 SV=2          | 0.873333333 |
| Galnt2   | Q6PB93 | Polypeptide N-acetylgalactosaminyltransferase 2 OS=Mus musculus OX=10090 GN=Galnt2 PE=1 SV=    | 0.896666667 |
| Sbno1    | Q689Z5 | Protein strawberry notch homolog 1 OS=Mus musculus OX=10090 GN=Sbno1 PE=1 SV=2                 | 0.866666667 |
| Csnk2a2  | O54833 | Casein kinase II subunit alpha' OS=Mus musculus OX=10090 GN=Csnk2a2 PE=1 SV=1                  | 0.893333333 |
| Trnt1    | Q8K1J6 | CCA tRNA nucleotidyltransferase 1 mitochondrial OS=Mus musculus OX=10090 GN=Trnt1 PE=1 SV=     | 0.903333333 |
| Gatad2a  | Q8CHY6 | Transcriptional repressor p66 alpha OS=Mus musculus OX=10090 GN=Gatad2a PE=1 SV=2              | 0.883333333 |
| Twf1     | Q91YR1 | Twinfilin-1 OS=Mus musculus OX=10090 GN=Twf1 PE=1 SV=2                                         | 0.883333333 |
| Crk      | Q64010 | Adapter molecule crk OS=Mus musculus OX=10090 GN=Crk PE=1 SV=1                                 | 0.856666667 |
| Papss1   | Q60967 | Bifunctional 3'-phosphoadenosine 5'-phosphosulfate synthase 1 OS=Mus musculus OX=10090 GN=F    | 0.89        |
| Dip2b    | Q3UH60 | Disco-interacting protein 2 homolog B OS=Mus musculus OX=10090 GN=Dip2b PE=1 SV=1              | 0.916666667 |
| Ipo8     | Q7TMY7 | Importin-8 OS=Mus musculus OX=10090 GN=Ipo8 PE=1 SV=3                                          | 0.936666667 |
| Scrib    | Q80U72 | Protein scribble homolog OS=Mus musculus OX=10090 GN=Scrib PE=1 SV=2                           | 0.72        |
| Rcn3     | Q8BH97 | Reticulocalbin-3 OS=Mus musculus OX=10090 GN=Rcn3 PE=1 SV=1                                    | 0.92        |
| Fhl1     | P97447 | Four and a half LIM domains protein 1 OS=Mus musculus OX=10090 GN=Fhl1 PE=1 SV=3               | 0.896666667 |
| Plin3    | Q9DBG5 | Perilipin-3 OS=Mus musculus OX=10090 GN=Plin3 PE=1 SV=1                                        | 0.836666667 |
| Fh       | P97807 | Fumarate hydratase mitochondrial OS=Mus musculus OX=10090 GN=Fh PE=1 SV=3                      | 0.836666667 |
| Dctn2    | Q99KJ8 | Dynactin subunit 2 OS=Mus musculus OX=10090 GN=Dctn2 PE=1 SV=3                                 | 0.86        |
| Psm6     | Q9QUM9 | Proteasome subunit alpha type-6 OS=Mus musculus OX=10090 GN=Psm6 PE=1 SV=1                     | 0.883333333 |
| Bub3     | Q9WVA3 | Mitotic checkpoint protein BUB3 OS=Mus musculus OX=10090 GN=Bub3 PE=1 SV=2                     | 0.883333333 |
| Dbnl     | Q62418 | Drebrin-like protein OS=Mus musculus OX=10090 GN=Dbnl PE=1 SV=2                                | 0.856666667 |

|        |        |                                                                                                 |             |
|--------|--------|-------------------------------------------------------------------------------------------------|-------------|
| Tcea1  | P10711 | Transcription elongation factor A protein 1 OS=Mus musculus OX=10090 GN=Tcea1 PE=1 SV=2         | 0.863333333 |
| Rps2   | P25444 | 40S ribosomal protein S2 OS=Mus musculus OX=10090 GN=Rps2 PE=1 SV=3                             | 0.9         |
| Zpr1   | Q62384 | Zinc finger protein ZPR1 OS=Mus musculus OX=10090 GN=Zpr1 PE=1 SV=1                             | 0.75        |
| RO60   | O08848 | 60 kDa SS-A/Ro ribonucleoprotein OS=Mus musculus OX=10090 GN=RO60 PE=1 SV=1                     | 0.85        |
| Ppm1g  | Q61074 | Protein phosphatase 1G OS=Mus musculus OX=10090 GN=Ppm1g PE=1 SV=3                              | 0.99        |
| Ncaph  | Q8C156 | Condensin complex subunit 2 OS=Mus musculus OX=10090 GN=Ncaph PE=1 SV=1                         | 0.883333333 |
| Lasp1  | Q61792 | LIM and SH3 domain protein 1 OS=Mus musculus OX=10090 GN=Lasp1 PE=1 SV=1                        | 0.866666667 |
| Nans   | Q99J77 | Sialic acid synthase OS=Mus musculus OX=10090 GN=Nans PE=1 SV=1                                 | 0.886666667 |
| Flot1  | O08917 | Flotillin-1 OS=Mus musculus OX=10090 GN=Flot1 PE=1 SV=1                                         | 0.89        |
| Ppp4r2 | Q0VGB7 | Serine/threonine-protein phosphatase 4 regulatory subunit 2 OS=Mus musculus OX=10090 GN=Ppp4r2  | 0.87        |
| Capzb  | P47757 | F-actin-capping protein subunit beta OS=Mus musculus OX=10090 GN=Capzb PE=1 SV=3                | 0.856666667 |
| Metap1 | Q8BP48 | Methionine aminopeptidase 1 OS=Mus musculus OX=10090 GN=Metap1 PE=1 SV=1                        | 0.906666667 |
| Ilvbl  | Q8BU33 | 2-hydroxyacyl-CoA lyase 2 OS=Mus musculus OX=10090 GN=Ilvbl PE=1 SV=1                           | 0.886666667 |
| Elavl1 | P70372 | ELAV-like protein 1 OS=Mus musculus OX=10090 GN=Elavl1 PE=1 SV=2                                | 0.903333333 |
| Tubg1  | P83887 | Tubulin gamma-1 chain OS=Mus musculus OX=10090 GN=Tubg1 PE=1 SV=1                               | 0.903333333 |
| Hspa14 | Q99M31 | Heat shock 70 kDa protein 14 OS=Mus musculus OX=10090 GN=Hspa14 PE=1 SV=2                       | 0.9         |
| Nxn    | P97346 | Nucleoredoxin OS=Mus musculus OX=10090 GN=Nxn PE=1 SV=1                                         | 0.923333333 |
| Seh1l  | Q8R2U0 | Nucleoporin SEH1 OS=Mus musculus OX=10090 GN=Seh1l PE=2 SV=1                                    | 0.9         |
| Nrp1   | P97333 | Neuropilin-1 OS=Mus musculus OX=10090 GN=Nrp1 PE=1 SV=2                                         | 0.876666667 |
| Ahsa1  | Q8BK64 | Activator of 90 kDa heat shock protein ATPase homolog 1 OS=Mus musculus OX=10090 GN=Ahsa1       | 0.856666667 |
| Niban1 | Q3UW53 | Protein Niban 1 OS=Mus musculus OX=10090 GN=Niban1 PE=1 SV=2                                    | 0.846666667 |
| Map1s  | Q8C052 | Microtubule-associated protein 1S OS=Mus musculus OX=10090 GN=Map1s PE=1 SV=2                   | 0.856666667 |
| Ik     | Q9Z1M8 | Protein Red OS=Mus musculus OX=10090 GN=Ik PE=1 SV=2                                            | 0.816666667 |
| Nup54  | Q8BTS4 | Nuclear pore complex protein Nup54 OS=Mus musculus OX=10090 GN=Nup54 PE=1 SV=1                  | 0.893333333 |
| Prkaa1 | Q5EG47 | 5'-AMP-activated protein kinase catalytic subunit alpha-1 OS=Mus musculus OX=10090 GN=Prkaa1    | 0.926666667 |
| Ylpm1  | Q9R0I7 | YLP motif-containing protein 1 OS=Mus musculus OX=10090 GN=Ylpm1 PE=2 SV=2                      | 0.873333333 |
| Phb2   | O35129 | Prohibitin-2 OS=Mus musculus OX=10090 GN=Phb2 PE=1 SV=1                                         | 0.916666667 |
| Gsr    | P47791 | Glutathione reductase mitochondrial OS=Mus musculus OX=10090 GN=Gsr PE=1 SV=3                   | 0.936666667 |
| Baiap2 | Q8BKX1 | Brain-specific angiogenesis inhibitor 1-associated protein 2 OS=Mus musculus OX=10090 GN=Baiap2 | 0.816666667 |
| Mical1 | Q8VDP3 | [F-actin]-monooxygenase MICAL1 OS=Mus musculus OX=10090 GN=Mical1 PE=1 SV=1                     | 0.863333333 |
| Sgpl1  | Q8R0X7 | Sphingosine-1-phosphate lyase 1 OS=Mus musculus OX=10090 GN=Sgpl1 PE=1 SV=1                     | 0.876666667 |
| Psme1  | P97371 | Proteasome activator complex subunit 1 OS=Mus musculus OX=10090 GN=Psme1 PE=1 SV=2              | 0.846666667 |
| Zc3h14 | Q8BJ05 | Zinc finger CCCH domain-containing protein 14 OS=Mus musculus OX=10090 GN=Zc3h14 PE=1 SV=1      | 0.986666667 |
| Glrx3  | Q9CQM9 | Glutaredoxin-3 OS=Mus musculus OX=10090 GN=Glrx3 PE=1 SV=1                                      | 0.896666667 |

|          |        |                                                                                                 |             |
|----------|--------|-------------------------------------------------------------------------------------------------|-------------|
| Tgm2     | P21981 | Protein-glutamine gamma-glutamyltransferase 2 OS=Mus musculus OX=10090 GN=Tgm2 PE=1 SV=4        | 0.826666667 |
| Aaas     | P58742 | Aladin OS=Mus musculus OX=10090 GN=Aaas PE=1 SV=1                                               | 0.866666667 |
| Ano6     | Q6P9J9 | Anoctamin-6 OS=Mus musculus OX=10090 GN=Ano6 PE=1 SV=1                                          | 0.816666667 |
| Pnpt1    | Q8K1R3 | Polyribonucleotide nucleotidyltransferase 1 mitochondrial OS=Mus musculus OX=10090 GN=Pnpt      | 0.993333333 |
| Nr3c1    | P06537 | Glucocorticoid receptor OS=Mus musculus OX=10090 GN=Nr3c1 PE=1 SV=1                             | 0.893333333 |
| Rpl6     | P47911 | 60S ribosomal protein L6 OS=Mus musculus OX=10090 GN=Rpl6 PE=1 SV=3                             | 0.906666667 |
| RTRAF    | Q9CQE8 | RNA transcription translation and transport factor protein OS=Mus musculus OX=10090 GN=RTRAF    | 0.943333333 |
| Rfc3     | Q8R323 | Replication factor C subunit 3 OS=Mus musculus OX=10090 GN=Rfc3 PE=1 SV=1                       | 0.913333333 |
| Anapc5   | Q8BTZ4 | Anaphase-promoting complex subunit 5 OS=Mus musculus OX=10090 GN=Anapc5 PE=1 SV=1               | 0.89        |
| Wdr18    | Q4VBE8 | WD repeat-containing protein 18 OS=Mus musculus OX=10090 GN=Wdr18 PE=1 SV=1                     | 0.963333333 |
| Ikbp     | Q9DBZ1 | Inhibitor of nuclear factor kappa-B kinase-interacting protein OS=Mus musculus OX=10090 GN=Ikbi | 0.903333333 |
| Arhgap35 | Q91YM2 | Rho GTPase-activating protein 35 OS=Mus musculus OX=10090 GN=Arhgap35 PE=1 SV=3                 | 1.046666667 |
| Pdia5    | Q921X9 | Protein disulfide-isomerase A5 OS=Mus musculus OX=10090 GN=Pdia5 PE=1 SV=1                      | 0.783333333 |
| Lrrc47   | Q505F5 | Leucine-rich repeat-containing protein 47 OS=Mus musculus OX=10090 GN=Lrrc47 PE=1 SV=1          | 0.886666667 |
| Utp6     | Q8VCY6 | U3 small nucleolar RNA-associated protein 6 homolog OS=Mus musculus OX=10090 GN=Utp6 PE=2       | 0.89        |
| Nup88    | Q8CEC0 | Nuclear pore complex protein Nup88 OS=Mus musculus OX=10090 GN=Nup88 PE=1 SV=1                  | 0.88        |
| Samm50   | Q8BGH2 | Sorting and assembly machinery component 50 homolog OS=Mus musculus OX=10090 GN=Samm5           | 0.836666667 |
| Racgap1  | Q9WVM1 | Rac GTPase-activating protein 1 OS=Mus musculus OX=10090 GN=Racgap1 PE=1 SV=1                   | 0.836666667 |
| Cpsf2    | O35218 | Cleavage and polyadenylation specificity factor subunit 2 OS=Mus musculus OX=10090 GN=Cpsf2 P   | 0.98        |
| Dab2     | P98078 | Disabled homolog 2 OS=Mus musculus OX=10090 GN=Dab2 PE=1 SV=2                                   | 0.843333333 |
| Lama5    | Q61001 | Laminin subunit alpha-5 OS=Mus musculus OX=10090 GN=Lama5 PE=1 SV=4                             | 1.02        |
| Setd3    | Q91WC0 | Actin-histidine N-methyltransferase OS=Mus musculus OX=10090 GN=Setd3 PE=1 SV=1                 | 0.81        |
| Rbm10    | Q99KG3 | RNA-binding protein 10 OS=Mus musculus OX=10090 GN=Rbm10 PE=1 SV=1                              | 0.81        |
| Wwc2     | Q6NXJ0 | Protein WWC2 OS=Mus musculus OX=10090 GN=Wwc2 PE=1 SV=1                                         | 0.883333333 |
| Larp4    | Q8BWW4 | La-related protein 4 OS=Mus musculus OX=10090 GN=Larp4 PE=1 SV=2                                | 0.886666667 |
| Plcd1    | Q8R3B1 | 1-phosphatidylinositol 4 5-bisphosphate phosphodiesterase delta-1 OS=Mus musculus OX=10090 G    | 1.096666667 |
| Ccdc6    | D3YZP9 | Coiled-coil domain-containing protein 6 OS=Mus musculus OX=10090 GN=Ccdc6 PE=1 SV=1             | 1.016666667 |
| Srpra    | Q9DBG7 | Signal recognition particle receptor subunit alpha OS=Mus musculus OX=10090 GN=Srpra PE=1 SV=   | 0.816666667 |
| Tmem214  | Q8BM55 | Transmembrane protein 214 OS=Mus musculus OX=10090 GN=Tmem214 PE=1 SV=1                         | 0.843333333 |
| Vac14    | Q80WQ2 | Protein VAC14 homolog OS=Mus musculus OX=10090 GN=Vac14 PE=1 SV=1                               | 1.17        |
| Gtf3c4   | Q8BMQ2 | General transcription factor 3C polypeptide 4 OS=Mus musculus OX=10090 GN=Gtf3c4 PE=1 SV=2      | 0.803333333 |
| Fto      | Q8BGW1 | Alpha-ketoglutarate-dependent dioxygenase FTO OS=Mus musculus OX=10090 GN=Fto PE=1 SV=1         | 0.95        |
| Rps9     | Q6ZWN5 | 40S ribosomal protein S9 OS=Mus musculus OX=10090 GN=Rps9 PE=1 SV=3                             | 0.903333333 |
| Rbmxl1   | Q91VM5 | RNA binding motif protein X-linked-like-1 OS=Mus musculus OX=10090 GN=Rbmxl1 PE=2 SV=1          | 0.856666667 |



|         |        |                                                                                                                                |             |
|---------|--------|--------------------------------------------------------------------------------------------------------------------------------|-------------|
| Ppp1ca  | P62137 | Serine/threonine-protein phosphatase PP1-alpha catalytic subunit OS=Mus musculus OX=10090 GN=Ppp1ca PE=1 SV=1                  | 0.87        |
| Ppp1cb  | P62141 | Serine/threonine-protein phosphatase PP1-beta catalytic subunit OS=Mus musculus OX=10090 GN=Ppp1cb PE=1 SV=1                   | 0.723333333 |
| Ahcyl2  | Q68FL4 | Putative adenosylhomocysteinase 3 OS=Mus musculus OX=10090 GN=Ahcyl2 PE=1 SV=1                                                 | 1.056666667 |
| Eif5a   | P63242 | Eukaryotic translation initiation factor 5A-1 OS=Mus musculus OX=10090 GN=Eif5a PE=1 SV=2                                      | 0.963333333 |
| Ppp2r1b | Q7TNP2 | Serine/threonine-protein phosphatase 2A 65 kDa regulatory subunit A beta isoform OS=Mus musculus OX=10090 GN=Ppp2r1b PE=1 SV=1 | 0.813333333 |
| Gnb2    | P62880 | Guanine nucleotide-binding protein G(I)/G(S)/G(T) subunit beta-2 OS=Mus musculus OX=10090 GN=Gnb2 PE=1 SV=1                    | 0.846666667 |
| Safb2   | Q80YR5 | Scaffold attachment factor B2 OS=Mus musculus OX=10090 GN=Safb2 PE=1 SV=2                                                      | 1.043333333 |
| Ubqln2  | Q9QZM0 | Ubiquilin-2 OS=Mus musculus OX=10090 GN=Ubqln2 PE=1 SV=2                                                                       | 0.856666667 |
| Irf2bp2 | E9Q1P8 | Interferon regulatory factor 2-binding protein 2 OS=Mus musculus OX=10090 GN=Irf2bp2 PE=1 SV=1                                 | 0.74        |
| Prdx4   | O08807 | Peroxiredoxin-4 OS=Mus musculus OX=10090 GN=Prdx4 PE=1 SV=1                                                                    | 0.896666667 |
| Pitpnb  | P53811 | Phosphatidylinositol transfer protein beta isoform OS=Mus musculus OX=10090 GN=Pitpnb PE=1 SV=1                                | 0.876666667 |
| Pycr2   | Q922Q4 | Pyrroline-5-carboxylate reductase 2 OS=Mus musculus OX=10090 GN=Pycr2 PE=1 SV=1                                                | 0.916666667 |
| Vdac3   | Q60931 | Voltage-dependent anion-selective channel protein 3 OS=Mus musculus OX=10090 GN=Vdac3 PE=1 SV=1                                | 0.926666667 |
| Akr1b8  | P45377 | Aldose reductase-related protein 2 OS=Mus musculus OX=10090 GN=Akr1b8 PE=1 SV=2                                                | 0.933333333 |
| Rrm2    | P11157 | Ribonucleoside-diphosphate reductase subunit M2 OS=Mus musculus OX=10090 GN=Rrm2 PE=1 SV=1                                     | 0.89        |
| Brd2    | Q7JJ13 | Bromodomain-containing protein 2 OS=Mus musculus OX=10090 GN=Brd2 PE=1 SV=1                                                    | 1.083333333 |
| Anxa4   | P97429 | Annexin A4 OS=Mus musculus OX=10090 GN=Anxa4 PE=1 SV=4                                                                         | 0.906666667 |
| Myo1b   | P46735 | Unconventional myosin-Ib OS=Mus musculus OX=10090 GN=Myo1b PE=1 SV=3                                                           | 0.87        |
| Papola  | Q61183 | Poly(A) polymerase alpha OS=Mus musculus OX=10090 GN=Papola PE=1 SV=4                                                          | 0.896666667 |
| Csnk2a1 | Q60737 | Casein kinase II subunit alpha OS=Mus musculus OX=10090 GN=Csnk2a1 PE=1 SV=2                                                   | 0.853333333 |
| Ddah1   | Q9CWS0 | N(G) N(G)-dimethylarginine dimethylaminohydrolase 1 OS=Mus musculus OX=10090 GN=Ddah1 PE=1 SV=1                                | 0.926666667 |
| Ddx20   | Q9JJY4 | Probable ATP-dependent RNA helicase DDX20 OS=Mus musculus OX=10090 GN=Ddx20 PE=1 SV=2                                          | 0.893333333 |
| Kif23   | E9Q5G3 | Kinesin-like protein KIF23 OS=Mus musculus OX=10090 GN=Kif23 PE=1 SV=1                                                         | 0.986666667 |
| Ank3    | G5E8K5 | Ankyrin-3 OS=Mus musculus OX=10090 GN=Ank3 PE=1 SV=1                                                                           | 0.833333333 |
| Gnl3    | Q8CI11 | Guanine nucleotide-binding protein-like 3 OS=Mus musculus OX=10090 GN=Gnl3 PE=1 SV=2                                           | 0.876666667 |
| Anxa7   | Q07076 | Annexin A7 OS=Mus musculus OX=10090 GN=Anxa7 PE=1 SV=2                                                                         | 0.853333333 |
| Kifc1   | Q9QWT9 | Kinesin-like protein KIFC1 OS=Mus musculus OX=10090 GN=Kifc1 PE=1 SV=2                                                         | 0.803333333 |
| Tmod3   | Q9JHJ0 | Tropomodulin-3 OS=Mus musculus OX=10090 GN=Tmod3 PE=1 SV=1                                                                     | 0.843333333 |
| Tns2    | Q8CGB6 | Tensin-2 OS=Mus musculus OX=10090 GN=Tns2 PE=1 SV=1                                                                            | 0.803333333 |
| Acsl5   | Q8JZR0 | Long-chain-fatty-acid--CoA ligase 5 OS=Mus musculus OX=10090 GN=Acsl5 PE=1 SV=1                                                | 0.82        |
| Pcnt    | P48725 | Pericentrin OS=Mus musculus OX=10090 GN=Pcnt PE=1 SV=2                                                                         | 1.06        |
| Ranbp3  | Q9CT10 | Ran-binding protein 3 OS=Mus musculus OX=10090 GN=Ranbp3 PE=1 SV=2                                                             | 0.913333333 |
| Acat2   | Q8CAY6 | Acetyl-CoA acetyltransferase cytosolic OS=Mus musculus OX=10090 GN=Acat2 PE=1 SV=2                                             | 0.866666667 |
| Uqcrc2  | Q9DB77 | Cytochrome b-c1 complex subunit 2 mitochondrial OS=Mus musculus OX=10090 GN=Uqcrc2 PE=1 SV=1                                   | 0.923333333 |

|         |        |                                                                                                 |             |
|---------|--------|-------------------------------------------------------------------------------------------------|-------------|
| U2af2   | P26369 | Splicing factor U2AF 65 kDa subunit OS=Mus musculus OX=10090 GN=U2af2 PE=1 SV=3                 | 0.883333333 |
| Pfn1    | P62962 | Profilin-1 OS=Mus musculus OX=10090 GN=Pfn1 PE=1 SV=2                                           | 0.89        |
| Memo1   | Q91VH6 | Protein MEMO1 OS=Mus musculus OX=10090 GN=Memo1 PE=1 SV=1                                       | 0.9         |
| Eif3h   | Q91WK2 | Eukaryotic translation initiation factor 3 subunit H OS=Mus musculus OX=10090 GN=Eif3h PE=1 SV= | 0.92        |
| Lyar    | Q08288 | Cell growth-regulating nucleolar protein OS=Mus musculus OX=10090 GN=Lyar PE=1 SV=2             | 0.966666667 |
| Myg1    | Q9JK81 | MYG1 exonuclease OS=Mus musculus OX=10090 GN=Myg1 PE=1 SV=1                                     | 0.84        |
| Ctsd    | P18242 | Cathepsin D OS=Mus musculus OX=10090 GN=Ctsd PE=1 SV=1                                          | 0.846666667 |
| Klhdc4  | Q92112 | Kelch domain-containing protein 4 OS=Mus musculus OX=10090 GN=Klhdc4 PE=2 SV=2                  | 0.866666667 |
| Cat     | P24270 | Catalase OS=Mus musculus OX=10090 GN=Cat PE=1 SV=4                                              | 0.833333333 |
| Raver1  | Q9CW46 | Ribonucleoprotein PTB-binding 1 OS=Mus musculus OX=10090 GN=Raver1 PE=1 SV=2                    | 0.836666667 |
| Znf326  | O88291 | DBIRD complex subunit ZNF326 OS=Mus musculus OX=10090 GN=Znf326 PE=1 SV=1                       | 0.846666667 |
| Mthfd2  | P18155 | Bifunctional methylenetetrahydrofolate dehydrogenase/cyclohydrolase mitochondrial OS=Mus m      | 0.866666667 |
| Tagln2  | Q9WVA4 | Transgelin-2 OS=Mus musculus OX=10090 GN=Tagln2 PE=1 SV=4                                       | 0.91        |
| Gps1    | Q99LD4 | COP9 signalosome complex subunit 1 OS=Mus musculus OX=10090 GN=Gps1 PE=1 SV=1                   | 0.853333333 |
| Gcat    | O88986 | 2-amino-3-ketobutyrate coenzyme A ligase mitochondrial OS=Mus musculus OX=10090 GN=Gcat P       | 0.84        |
| Rpl7a   | P12970 | 60S ribosomal protein L7a OS=Mus musculus OX=10090 GN=Rpl7a PE=1 SV=2                           | 0.893333333 |
| Dlat    | Q8BMF4 | Dihydrolipoyllysine-residue acetyltransferase component of pyruvate dehydrogenase complex mit   | 0.85        |
| Kif20a  | P97329 | Kinesin-like protein KIF20A OS=Mus musculus OX=10090 GN=Kif20a PE=1 SV=1                        | 1.003333333 |
| Rps8    | P62242 | 40S ribosomal protein S8 OS=Mus musculus OX=10090 GN=Rps8 PE=1 SV=2                             | 0.893333333 |
| Blmh    | Q8R016 | Bleomycin hydrolase OS=Mus musculus OX=10090 GN=Blmh PE=1 SV=1                                  | 0.863333333 |
| Rab7a   | P51150 | Ras-related protein Rab-7a OS=Mus musculus OX=10090 GN=Rab7a PE=1 SV=2                          | 0.913333333 |
| Tp53bp1 | P70399 | TP53-binding protein 1 OS=Mus musculus OX=10090 GN=Tp53bp1 PE=1 SV=3                            | 0.846666667 |
| Vcan    | Q62059 | Versican core protein OS=Mus musculus OX=10090 GN=Vcan PE=1 SV=2                                | 0.95        |
| Phip    | Q8VDD9 | PH-interacting protein OS=Mus musculus OX=10090 GN=Phip PE=1 SV=2                               | 1.07        |
| Rnmt    | Q9D0L8 | mRNA cap guanine-N7 methyltransferase OS=Mus musculus OX=10090 GN=Rnmt PE=1 SV=1                | 0.883333333 |
| Pak1ip1 | Q9DCE5 | p21-activated protein kinase-interacting protein 1 OS=Mus musculus OX=10090 GN=Pak1ip1 PE=1     | 0.816666667 |
| Aqr     | Q8CFQ3 | RNA helicase aquarius OS=Mus musculus OX=10090 GN=Aqr PE=1 SV=2                                 | 0.886666667 |
| Rasa3   | Q60790 | Ras GTPase-activating protein 3 OS=Mus musculus OX=10090 GN=Rasa3 PE=1 SV=2                     | 0.763333333 |
| Rpl10a  | P53026 | 60S ribosomal protein L10a OS=Mus musculus OX=10090 GN=Rpl10a PE=1 SV=3                         | 0.896666667 |
| Col5a1  | O88207 | Collagen alpha-1(V) chain OS=Mus musculus OX=10090 GN=Col5a1 PE=1 SV=2                          | 0.716666667 |
| Dnajc7  | Q9QYI3 | DnaJ homolog subfamily C member 7 OS=Mus musculus OX=10090 GN=Dnajc7 PE=1 SV=2                  | 0.91        |
| Eif3g   | Q9Z1D1 | Eukaryotic translation initiation factor 3 subunit G OS=Mus musculus OX=10090 GN=Eif3g PE=1 SV= | 0.866666667 |
| Zc3h15  | Q3TIV5 | Zinc finger CCCH domain-containing protein 15 OS=Mus musculus OX=10090 GN=Zc3h15 PE=1 SV=       | 0.833333333 |
| Tsta3   | P23591 | GDP-L-fucose synthase OS=Mus musculus OX=10090 GN=Tsta3 PE=1 SV=3                               | 0.84        |

|         |        |                                                                                                                                       |
|---------|--------|---------------------------------------------------------------------------------------------------------------------------------------|
| Hadhb   | Q99JY0 | Trifunctional enzyme subunit beta mitochondrial OS=Mus musculus OX=10090 GN=Hadhb PE=1 SV=0.963333333                                 |
| Adam9   | Q61072 | Disintegrin and metalloproteinase domain-containing protein 9 OS=Mus musculus OX=10090 GN=Adam9 PE=1 SV=0.783333333                   |
| Me2     | Q99KE1 | NAD-dependent malic enzyme mitochondrial OS=Mus musculus OX=10090 GN=Me2 PE=1 SV=1 0.91                                               |
| Anapc4  | Q91W96 | Anaphase-promoting complex subunit 4 OS=Mus musculus OX=10090 GN=Anapc4 PE=1 SV=1 0.746666667                                         |
| Mpp1    | P70290 | 55 kDa erythrocyte membrane protein OS=Mus musculus OX=10090 GN=Mpp1 PE=1 SV=1 0.846666667                                            |
| Hspbp1  | Q99P31 | Hsp70-binding protein 1 OS=Mus musculus OX=10090 GN=Hspbp1 PE=1 SV=1 0.956666667                                                      |
| Cert    | Q9EQG9 | Ceramide transfer protein OS=Mus musculus OX=10090 GN=Cert1 PE=1 SV=1 1.046666667                                                     |
| Tbk1    | Q9WUN2 | Serine/threonine-protein kinase TBK1 OS=Mus musculus OX=10090 GN=Tbk1 PE=1 SV=1 0.883333333                                           |
| Pwp2    | Q8BU03 | Periodic tryptophan protein 2 homolog OS=Mus musculus OX=10090 GN=Pwp2 PE=1 SV=1 0.82                                                 |
| Nup85   | Q8R480 | Nuclear pore complex protein Nup85 OS=Mus musculus OX=10090 GN=Nup85 PE=1 SV=1 0.863333333                                            |
| Nf1     | Q04690 | Neurofibromin OS=Mus musculus OX=10090 GN=Nf1 PE=1 SV=1 1.02                                                                          |
| Smu1    | Q3UKJ7 | WD40 repeat-containing protein SMU1 OS=Mus musculus OX=10090 GN=Smu1 PE=2 SV=2 0.84                                                   |
| Ccdc47  | Q9D024 | Coiled-coil domain-containing protein 47 OS=Mus musculus OX=10090 GN=Ccdc47 PE=1 SV=2 0.94                                            |
| Filip1l | Q6P6L0 | Filamin A-interacting protein 1-like OS=Mus musculus OX=10090 GN=Filip1l PE=1 SV=2 0.886666667                                        |
| Tagln   | P37804 | Transgelin OS=Mus musculus OX=10090 GN=Tagln PE=1 SV=3 0.943333333                                                                    |
| Acadl   | P51174 | Long-chain specific acyl-CoA dehydrogenase mitochondrial OS=Mus musculus OX=10090 GN=Acadl PE=1 SV=1 0.88                             |
| Ddost   | O54734 | Dolichyl-diphosphooligosaccharide--protein glycosyltransferase 48 kDa subunit OS=Mus musculus OX=10090 GN=Ddost PE=1 SV=1 0.866666667 |
| Snx4    | Q91YJ2 | Sorting nexin-4 OS=Mus musculus OX=10090 GN=Snx4 PE=1 SV=1 0.923333333                                                                |
| Oga     | Q9EQQ9 | Protein O-GlcNAcase OS=Mus musculus OX=10090 GN=Oga PE=1 SV=2 0.833333333                                                             |
| Apeh    | Q8R146 | Acylamino-acid-releasing enzyme OS=Mus musculus OX=10090 GN=Apeh PE=1 SV=3 0.88                                                       |
| Xpo4    | Q9ESJ0 | Exportin-4 OS=Mus musculus OX=10090 GN=Xpo4 PE=1 SV=2 0.916666667                                                                     |
| Arpc2   | Q9CVB6 | Actin-related protein 2/3 complex subunit 2 OS=Mus musculus OX=10090 GN=Arpc2 PE=1 SV=3 0.876666667                                   |
| Rbpj    | P31266 | Recombining binding protein suppressor of hairless OS=Mus musculus OX=10090 GN=Rbpj PE=1 SV=1 0.886666667                             |
|         | Q8C3W1 | Uncharacterized protein C1orf198 homolog OS=Mus musculus OX=10090 GN=Q8C3W1 PE=1 SV=1 0.746666667                                     |
| Idh3a   | Q9D6R2 | Isocitrate dehydrogenase [NAD] subunit alpha mitochondrial OS=Mus musculus OX=10090 GN=Idh3a PE=1 SV=1 0.863333333                    |
| Htatsf1 | Q8BGC0 | HIV Tat-specific factor 1 homolog OS=Mus musculus OX=10090 GN=Htatsf1 PE=1 SV=1 0.906666667                                           |
| Slfn9   | B1ARD6 | Schlafen family member 9 OS=Mus musculus OX=10090 GN=Slfn9 PE=2 SV=1 0.806666667                                                      |
| Snw1    | Q9CSN1 | SNW domain-containing protein 1 OS=Mus musculus OX=10090 GN=Snw1 PE=1 SV=3 0.873333333                                                |
| Pum1    | Q80U78 | Pumilio homolog 1 OS=Mus musculus OX=10090 GN=Pum1 PE=1 SV=2 0.933333333                                                              |
| Pes1    | Q9EQ61 | Pescadillo homolog OS=Mus musculus OX=10090 GN=Pes1 PE=1 SV=1 0.893333333                                                             |
| Arih1   | Q9Z1K5 | E3 ubiquitin-protein ligase ARIH1 OS=Mus musculus OX=10090 GN=Arih1 PE=1 SV=3 0.813333333                                             |
| Colec12 | Q8K4Q8 | Collectin-12 OS=Mus musculus OX=10090 GN=Colec12 PE=1 SV=1 0.893333333                                                                |
| Mrps27  | Q8BK72 | 28S ribosomal protein S27 mitochondrial OS=Mus musculus OX=10090 GN=Mrps27 PE=1 SV=2 0.813333333                                      |
| Dglucy  | Q8BH86 | D-glutamate cyclase mitochondrial OS=Mus musculus OX=10090 GN=Dglucy PE=1 SV=1 0.833333333                                            |

|           |        |                                                                                              |             |
|-----------|--------|----------------------------------------------------------------------------------------------|-------------|
| Relch     | Q148V7 | RAB11-binding protein RELCH OS=Mus musculus OX=10090 GN=Relch PE=1 SV=1                      | 0.976666667 |
| Atad3     | Q92511 | ATPase family AAA domain-containing protein 3 OS=Mus musculus OX=10090 GN=Atad3 PE=1 SV=1    | 0.896666667 |
| Fbxw8     | Q8BIA4 | F-box/WD repeat-containing protein 8 OS=Mus musculus OX=10090 GN=Fbxw8 PE=1 SV=2             | 0.84        |
| Pdha1     | P35486 | Pyruvate dehydrogenase E1 component subunit alpha somatic form mitochondrial OS=Mus muscu    | 0.873333333 |
| Vcam1     | P29533 | Vascular cell adhesion protein 1 OS=Mus musculus OX=10090 GN=Vcam1 PE=1 SV=1                 | 0.87        |
| Xab2      | Q9DCD2 | Pre-mRNA-splicing factor SYF1 OS=Mus musculus OX=10090 GN=Xab2 PE=1 SV=1                     | 0.953333333 |
| Acad9     | Q8JZN5 | Complex I assembly factor ACAD9 mitochondrial OS=Mus musculus OX=10090 GN=Acad9 PE=1 SV=     | 0.926666667 |
| Sin3a     | Q60520 | Paired amphipathic helix protein Sin3a OS=Mus musculus OX=10090 GN=Sin3a PE=1 SV=3           | 0.89        |
| Nemf      | Q8CCP0 | Nuclear export mediator factor Nemf OS=Mus musculus OX=10090 GN=Nemf PE=1 SV=2               | 0.923333333 |
| Ampd2     | Q9DBT5 | AMP deaminase 2 OS=Mus musculus OX=10090 GN=Ampd2 PE=1 SV=1                                  | 1.01        |
| Glmn      | Q8BZM1 | Glomulin OS=Mus musculus OX=10090 GN=Glmn PE=1 SV=1                                          | 0.84        |
| Hist1h2ah | Q8CGP6 | Histone H2A type 1-H OS=Mus musculus OX=10090 GN=H2ac12 PE=1 SV=3                            | 0.89        |
| Hist1h2af | Q8CGP5 | Histone H2A type 1-F OS=Mus musculus OX=10090 GN=Hist1h2af PE=1 SV=3                         | 0.89        |
| Hist1h2an | C0HKE7 | Histone H2A type 1-N OS=Mus musculus OX=10090 GN=Hist1h2an PE=1 SV=1                         | 0.89        |
| H2ac13    | C0HKE6 | Histone H2A type 1-I OS=Mus musculus OX=10090 GN=H2ac13 PE=1 SV=1                            | 0.89        |
| H2ac11    | C0HKE5 | Histone H2A type 1-G OS=Mus musculus OX=10090 GN=H2ac11 PE=1 SV=1                            | 0.89        |
| H2ac15    | Q8CGP7 | Histone H2A type 1-K OS=Mus musculus OX=10090 GN=H2ac15 PE=1 SV=3                            | 0.89        |
| Hist3h2a  | Q8BFU2 | Histone H2A type 3 OS=Mus musculus OX=10090 GN=H2aw PE=1 SV=3                                | 0.89        |
| H2ac7     | C0HKE3 | Histone H2A type 1-D OS=Mus musculus OX=10090 GN=H2ac7 PE=1 SV=1                             | 0.89        |
| Hist1h2ap | C0HKE9 | Histone H2A type 1-P OS=Mus musculus OX=10090 GN=Hist1h2ap PE=1 SV=1                         | 0.89        |
| H2ac4     | C0HKE1 | Histone H2A type 1-B OS=Mus musculus OX=10090 GN=H2ac4 PE=1 SV=1                             | 0.89        |
| Hist1h2ac | C0HKE2 | Histone H2A type 1-C OS=Mus musculus OX=10090 GN=H2ac6 PE=1 SV=1                             | 0.89        |
| H2ac8     | C0HKE4 | Histone H2A type 1-E OS=Mus musculus OX=10090 GN=H2ac8 PE=1 SV=1                             | 0.89        |
| Hist1h2ao | C0HKE8 | Histone H2A type 1-O OS=Mus musculus OX=10090 GN=Hist1h2ao PE=1 SV=1                         | 0.89        |
| Hnrnp2    | P70333 | Heterogeneous nuclear ribonucleoprotein H2 OS=Mus musculus OX=10090 GN=Hnrnp2 PE=1 SV=       | 0.88        |
| Tpm3      | P21107 | Tropomyosin alpha-3 chain OS=Mus musculus OX=10090 GN=Tpm3 PE=1 SV=3                         | 0.896666667 |
| Gnai2     | P08752 | Guanine nucleotide-binding protein G(i) subunit alpha-2 OS=Mus musculus OX=10090 GN=Gnai2 P  | 0.876666667 |
| Arfgef1   | G3X9K3 | Brefeldin A-inhibited guanine nucleotide-exchange protein 1 OS=Mus musculus OX=10090 GN=Arfg | 0.7         |
| Hdac1     | O09106 | Histone deacetylase 1 OS=Mus musculus OX=10090 GN=Hdac1 PE=1 SV=1                            | 0.886666667 |
| Septin8   | Q8CHH9 | Septin-8 OS=Mus musculus OX=10090 GN=Septin8 PE=1 SV=4                                       | 0.81        |
| Map2k1    | P31938 | Dual specificity mitogen-activated protein kinase kinase 1 OS=Mus musculus OX=10090 GN=Map2k | 0.963333333 |
| Brd3      | Q8K2F0 | Bromodomain-containing protein 3 OS=Mus musculus OX=10090 GN=Brd3 PE=1 SV=2                  | 0.96        |
| Irf2bpl   | Q8K3X4 | Probable E3 ubiquitin-protein ligase IRF2BPL OS=Mus musculus OX=10090 GN=Irf2bpl PE=1 SV=1   | 1.036666667 |
| Ywhaq     | P68254 | 14-3-3 protein theta OS=Mus musculus OX=10090 GN=Ywhaq PE=1 SV=1                             | 0.913333333 |

|          |        |                                                                                                            |             |
|----------|--------|------------------------------------------------------------------------------------------------------------|-------------|
| Kpna4    | O35343 | Importin subunit alpha-3 OS=Mus musculus OX=10090 GN=Kpna4 PE=1 SV=1                                       | 0.91        |
| Pitpna   | P53810 | Phosphatidylinositol transfer protein alpha isoform OS=Mus musculus OX=10090 GN=Pitpna PE=1 SV=1           | 0.88        |
| Mta1     | Q8K4B0 | Metastasis-associated protein MTA1 OS=Mus musculus OX=10090 GN=Mta1 PE=1 SV=1                              | 0.903333333 |
| Hdgf     | P51859 | Hepatoma-derived growth factor OS=Mus musculus OX=10090 GN=Hdgf PE=1 SV=2                                  | 0.82        |
| H2afy2   | Q8CCK0 | Core histone macro-H2A.2 OS=Mus musculus OX=10090 GN=Macroh2a2 PE=1 SV=3                                   | 0.863333333 |
| Ldhb     | P16125 | L-lactate dehydrogenase B chain OS=Mus musculus OX=10090 GN=Ldhb PE=1 SV=2                                 | 0.82        |
| Arid1a   | A2BH40 | AT-rich interactive domain-containing protein 1A OS=Mus musculus OX=10090 GN=Arid1a PE=1 SV=1              | 0.946666667 |
| Bzw1     | Q9CQC6 | Basic leucine zipper and W2 domain-containing protein 1 OS=Mus musculus OX=10090 GN=Bzw1 PE=1 SV=1         | 0.863333333 |
| Snx2     | Q9CWK8 | Sorting nexin-2 OS=Mus musculus OX=10090 GN=Snx2 PE=1 SV=2                                                 | 0.83        |
| Tmx3     | Q8BXZ1 | Protein disulfide-isomerase TMX3 OS=Mus musculus OX=10090 GN=Tmx3 PE=1 SV=2                                | 0.83        |
| Kif2a    | P28740 | Kinesin-like protein KIF2A OS=Mus musculus OX=10090 GN=Kif2a PE=1 SV=2                                     | 0.986666667 |
| Strn     | O55106 | Striatin OS=Mus musculus OX=10090 GN=Strn PE=1 SV=2                                                        | 0.96        |
| Snx1     | Q9WV80 | Sorting nexin-1 OS=Mus musculus OX=10090 GN=Snx1 PE=1 SV=1                                                 | 0.916666667 |
| Utp14a   | Q640M1 | U3 small nucleolar RNA-associated protein 14 homolog A OS=Mus musculus OX=10090 GN=Utp14a PE=1 SV=1        | 0.773333333 |
| Clic1    | Q9Z1Q5 | Chloride intracellular channel protein 1 OS=Mus musculus OX=10090 GN=Clic1 PE=1 SV=3                       | 0.866666667 |
| Bod1l    | E9Q6J5 | Biorientation of chromosomes in cell division protein 1-like 1 OS=Mus musculus OX=10090 GN=Bod1l PE=1 SV=1 | 0.89        |
| Shmt1    | P50431 | Serine hydroxymethyltransferase cytosolic OS=Mus musculus OX=10090 GN=Shmt1 PE=1 SV=3                      | 0.85        |
| Clic4    | Q9QYB1 | Chloride intracellular channel protein 4 OS=Mus musculus OX=10090 GN=Clic4 PE=1 SV=3                       | 0.813333333 |
| Vdac2    | Q60930 | Voltage-dependent anion-selective channel protein 2 OS=Mus musculus OX=10090 GN=Vdac2 PE=1 SV=1            | 0.903333333 |
| Acsl4    | Q9QUJ7 | Long-chain-fatty-acid--CoA ligase 4 OS=Mus musculus OX=10090 GN=Acsl4 PE=1 SV=2                            | 0.88        |
| Nol6     | Q8R5K4 | Nucleolar protein 6 OS=Mus musculus OX=10090 GN=Nol6 PE=2 SV=2                                             | 0.84        |
| Stxbp1   | O08599 | Syntaxin-binding protein 1 OS=Mus musculus OX=10090 GN=Stxbp1 PE=1 SV=2                                    | 0.89        |
| Gns      | Q8BFR4 | N-acetylglucosamine-6-sulfatase OS=Mus musculus OX=10090 GN=Gns PE=1 SV=1                                  | 0.88        |
| Gsto1    | O09131 | Glutathione S-transferase omega-1 OS=Mus musculus OX=10090 GN=Gsto1 PE=1 SV=2                              | 0.886666667 |
| Dstn     | Q9R0P5 | Destrin OS=Mus musculus OX=10090 GN=Dstn PE=1 SV=3                                                         | 0.93        |
| Sh3pxd2b | A2AAY5 | SH3 and PX domain-containing protein 2B OS=Mus musculus OX=10090 GN=Sh3pxd2b PE=1 SV=1                     | 0.816666667 |
| Snx5     | Q9D8U8 | Sorting nexin-5 OS=Mus musculus OX=10090 GN=Snx5 PE=1 SV=1                                                 | 0.886666667 |
| Mif      | P34884 | Macrophage migration inhibitory factor OS=Mus musculus OX=10090 GN=Mif PE=1 SV=2                           | 0.88        |
| Sec13    | Q9D1M0 | Protein SEC13 homolog OS=Mus musculus OX=10090 GN=Sec13 PE=1 SV=3                                          | 0.91        |
| Fbl      | P35550 | rRNA 2'-O-methyltransferase fibrillarin OS=Mus musculus OX=10090 GN=Fbl PE=1 SV=2                          | 0.903333333 |
| Ctsb     | P10605 | Cathepsin B OS=Mus musculus OX=10090 GN=Ctsb PE=1 SV=2                                                     | 0.873333333 |
| Plrg1    | Q922V4 | Pleiotropic regulator 1 OS=Mus musculus OX=10090 GN=Plrg1 PE=1 SV=1                                        | 0.86        |
| Fhl2     | O70433 | Four and a half LIM domains protein 2 OS=Mus musculus OX=10090 GN=Fhl2 PE=1 SV=1                           | 0.883333333 |
| Eif3m    | Q99JX4 | Eukaryotic translation initiation factor 3 subunit M OS=Mus musculus OX=10090 GN=Eif3m PE=1 SV=1           | 0.866666667 |



|          |        |                                                                                                           |             |
|----------|--------|-----------------------------------------------------------------------------------------------------------|-------------|
| Psma2    | P49722 | Proteasome subunit alpha type-2 OS=Mus musculus OX=10090 GN=Psma2 PE=1 SV=3                               | 0.833333333 |
| Sqstm1   | Q64337 | Sequestosome-1 OS=Mus musculus OX=10090 GN=Sqstm1 PE=1 SV=1                                               | 0.806666667 |
| Abcf1    | Q6P542 | ATP-binding cassette sub-family F member 1 OS=Mus musculus OX=10090 GN=Abcf1 PE=1 SV=1                    | 0.88        |
| Fam114a1 | Q9D281 | Protein Noxp20 OS=Mus musculus OX=10090 GN=Fam114a1 PE=1 SV=1                                             | 0.85        |
| Ppp1r7   | Q3UM45 | Protein phosphatase 1 regulatory subunit 7 OS=Mus musculus OX=10090 GN=Ppp1r7 PE=1 SV=2                   | 0.863333333 |
| Rbm39    | Q8VH51 | RNA-binding protein 39 OS=Mus musculus OX=10090 GN=Rbm39 PE=1 SV=2                                        | 0.88        |
| Itga11   | P61622 | Integrin alpha-11 OS=Mus musculus OX=10090 GN=Itga11 PE=1 SV=1                                            | 0.946666667 |
| Lox      | P28301 | Protein-lysine 6-oxidase OS=Mus musculus OX=10090 GN=Lox PE=1 SV=1                                        | 0.883333333 |
| Nampt    | Q99KQ4 | Nicotinamide phosphoribosyltransferase OS=Mus musculus OX=10090 GN=Nampt PE=1 SV=1                        | 0.85        |
| P4ha2    | Q60716 | Prolyl 4-hydroxylase subunit alpha-2 OS=Mus musculus OX=10090 GN=P4ha2 PE=1 SV=1                          | 0.946666667 |
| Pdhb     | Q9D051 | Pyruvate dehydrogenase E1 component subunit beta mitochondrial OS=Mus musculus OX=10090 GN=Pdhb PE=1 SV=1 | 0.84        |
| Pex5     | O09012 | Peroxisomal targeting signal 1 receptor OS=Mus musculus OX=10090 GN=Pex5 PE=1 SV=2                        | 0.816666667 |
| Fhod1    | Q6P9Q4 | FH1/FH2 domain-containing protein 1 OS=Mus musculus OX=10090 GN=Fhod1 PE=1 SV=3                           | 0.86        |
| Acaa2    | Q8BWT1 | 3-ketoacyl-CoA thiolase mitochondrial OS=Mus musculus OX=10090 GN=Acaa2 PE=1 SV=3                         | 0.873333333 |
| Drg2     | Q9QXB9 | Developmentally-regulated GTP-binding protein 2 OS=Mus musculus OX=10090 GN=Drg2 PE=1 SV=1                | 0.883333333 |
| Nsfl1c   | Q9CZ44 | NSFL1 cofactor p47 OS=Mus musculus OX=10090 GN=Nsfl1c PE=1 SV=1                                           | 0.863333333 |
| Mtdh     | Q80WJ7 | Protein LYRIC OS=Mus musculus OX=10090 GN=Mtdh PE=1 SV=1                                                  | 0.833333333 |
| Cops2    | P61202 | COP9 signalosome complex subunit 2 OS=Mus musculus OX=10090 GN=Cops2 PE=1 SV=1                            | 0.903333333 |
| Gaa      | P70699 | Lysosomal alpha-glucosidase OS=Mus musculus OX=10090 GN=Gaa PE=1 SV=2                                     | 0.89        |
| Slc25a24 | Q8BMD8 | Calcium-binding mitochondrial carrier protein SCaMC-1 OS=Mus musculus OX=10090 GN=Slc25a24 PE=1 SV=1      | 0.853333333 |
| Lss      | Q8BLN5 | Lanosterol synthase OS=Mus musculus OX=10090 GN=Lss PE=1 SV=2                                             | 0.92        |
| Psap     | Q61207 | Prosaposin OS=Mus musculus OX=10090 GN=Psap PE=1 SV=2                                                     | 0.823333333 |
| Api5     | O35841 | Apoptosis inhibitor 5 OS=Mus musculus OX=10090 GN=Api5 PE=1 SV=2                                          | 0.886666667 |
| Gpt2     | Q8BGT5 | Alanine aminotransferase 2 OS=Mus musculus OX=10090 GN=Gpt2 PE=1 SV=1                                     | 0.893333333 |
| Cyp20a1  | Q8BKE6 | Cytochrome P450 20A1 OS=Mus musculus OX=10090 GN=Cyp20a1 PE=1 SV=1                                        | 0.823333333 |
| Rpl15    | Q9CZM2 | 60S ribosomal protein L15 OS=Mus musculus OX=10090 GN=Rpl15 PE=1 SV=4                                     | 0.876666667 |
| Cdc23    | Q8BGZ4 | Cell division cycle protein 23 homolog OS=Mus musculus OX=10090 GN=Cdc23 PE=1 SV=2                        | 0.93        |
| Dbn1     | Q9QXS6 | Drebrin OS=Mus musculus OX=10090 GN=Dbn1 PE=1 SV=4                                                        | 0.913333333 |
| Akap2    | O54931 | A-kinase anchor protein 2 OS=Mus musculus OX=10090 GN=Akap2 PE=1 SV=3                                     | 0.813333333 |
| Ppp4r1   | Q8K2V1 | Serine/threonine-protein phosphatase 4 regulatory subunit 1 OS=Mus musculus OX=10090 GN=Ppp4r1 PE=1 SV=1  | 0.866666667 |
| Emc1     | Q8C7X2 | ER membrane protein complex subunit 1 OS=Mus musculus OX=10090 GN=Emc1 PE=1 SV=1                          | 0.873333333 |
| Ckap2    | Q3V1H1 | Cytoskeleton-associated protein 2 OS=Mus musculus OX=10090 GN=Ckap2 PE=1 SV=1                             | 0.813333333 |
| Pgm2     | Q7TSV4 | Phosphoglucomutase-2 OS=Mus musculus OX=10090 GN=Pgm2 PE=1 SV=1                                           | 0.88        |
| Rab3gap1 | Q80UJ7 | Rab3 GTPase-activating protein catalytic subunit OS=Mus musculus OX=10090 GN=Rab3gap1 PE=1 SV=1           | 1.12        |

|           |        |                                                                                                    |             |
|-----------|--------|----------------------------------------------------------------------------------------------------|-------------|
| Atp6v1c1  | Q9Z1G3 | V-type proton ATPase subunit C 1 OS=Mus musculus OX=10090 GN=Atp6v1c1 PE=1 SV=4                    | 0.873333333 |
| Larp7     | Q05CL8 | La-related protein 7 OS=Mus musculus OX=10090 GN=Larp7 PE=1 SV=2                                   | 0.806666667 |
| Pmpca     | Q9DC61 | Mitochondrial-processing peptidase subunit alpha OS=Mus musculus OX=10090 GN=Pmpca PE=1 SV=1       | 0.866666667 |
| Esyt2     | Q3TZZ7 | Extended synaptotagmin-2 OS=Mus musculus OX=10090 GN=Esyt2 PE=1 SV=1                               | 0.923333333 |
| Nid1      | P10493 | Nidogen-1 OS=Mus musculus OX=10090 GN=Nid1 PE=1 SV=2                                               | 0.963333333 |
| Ncln      | Q8VCM8 | Nicalin OS=Mus musculus OX=10090 GN=Ncln PE=1 SV=2                                                 | 0.863333333 |
| Inpp1     | Q6P549 | Phosphatidylinositol 3 4 5-trisphosphate 5-phosphatase 2 OS=Mus musculus OX=10090 GN=Inpp1         | 1.016666667 |
| Ccdc88a   | Q5SNZ0 | Girdin OS=Mus musculus OX=10090 GN=Ccdc88a PE=1 SV=2                                               | 1.03        |
| Mov10     | P23249 | Putative helicase MOV-10 OS=Mus musculus OX=10090 GN=Mov10 PE=1 SV=2                               | 0.953333333 |
| U2surp    | Q6NV83 | U2 snRNP-associated SURP motif-containing protein OS=Mus musculus OX=10090 GN=U2surp PE=1 SV=1     | 0.993333333 |
| Ap1m1     | P35585 | AP-1 complex subunit mu-1 OS=Mus musculus OX=10090 GN=Ap1m1 PE=1 SV=3                              | 0.903333333 |
| Anapc7    | Q9WVM3 | Anaphase-promoting complex subunit 7 OS=Mus musculus OX=10090 GN=Anapc7 PE=1 SV=3                  | 1.143333333 |
| Ncoa5     | Q91W39 | Nuclear receptor coactivator 5 OS=Mus musculus OX=10090 GN=Ncoa5 PE=1 SV=1                         | 0.8         |
| Hook3     | Q8BUK6 | Protein Hook homolog 3 OS=Mus musculus OX=10090 GN=Hook3 PE=1 SV=2                                 | 0.916666667 |
| Dock11    | A2AF47 | Dedicator of cytokinesis protein 11 OS=Mus musculus OX=10090 GN=Dock11 PE=1 SV=1                   | 0.973333333 |
| Nup50     | Q9JIH2 | Nuclear pore complex protein Nup50 OS=Mus musculus OX=10090 GN=Nup50 PE=1 SV=3                     | 0.84        |
| Med23     | Q80YQ2 | Mediator of RNA polymerase II transcription subunit 23 OS=Mus musculus OX=10090 GN=Med23 PE=1 SV=1 | 0.83        |
| Blvra     | Q9CY64 | Biliverdin reductase A OS=Mus musculus OX=10090 GN=Blvra PE=1 SV=1                                 | 0.856666667 |
| Mical2    | Q8BML1 | [F-actin]-monooxygenase MICAL2 OS=Mus musculus OX=10090 GN=Mical2 PE=1 SV=1                        | 0.903333333 |
| H2bc15    | P10853 | Histone H2B type 1-F/J/L OS=Mus musculus OX=10090 GN=H2bc7 PE=1 SV=2                               | 0.633333333 |
| H2bc12    | Q8CGP1 | Histone H2B type 1-K OS=Mus musculus OX=10090 GN=H2bc12 PE=1 SV=3                                  | 0.633333333 |
| Hist1h2bh | Q64478 | Histone H2B type 1-H OS=Mus musculus OX=10090 GN=H2bc9 PE=1 SV=3                                   | 0.633333333 |
| H2bc8     | Q6ZWY9 | Histone H2B type 1-C/E/G OS=Mus musculus OX=10090 GN=H2bc4 PE=1 SV=3                               | 0.633333333 |
| Actr1b    | Q8R5C5 | Beta-centractin OS=Mus musculus OX=10090 GN=Actr1b PE=1 SV=1                                       | 0.843333333 |
| Ywhab     | Q9CQV8 | 14-3-3 protein beta/alpha OS=Mus musculus OX=10090 GN=Ywhab PE=1 SV=3                              | 0.903333333 |
| Tpm2      | P58774 | Tropomyosin beta chain OS=Mus musculus OX=10090 GN=Tpm2 PE=1 SV=1                                  | 0.86        |
| Prkca     | P20444 | Protein kinase C alpha type OS=Mus musculus OX=10090 GN=Prkca PE=1 SV=3                            | 0.843333333 |
| Mapk3     | Q63844 | Mitogen-activated protein kinase 3 OS=Mus musculus OX=10090 GN=Mapk3 PE=1 SV=5                     | 0.733333333 |
| Gstm1     | P10649 | Glutathione S-transferase Mu 1 OS=Mus musculus OX=10090 GN=Gstm1 PE=1 SV=2                         | 0.843333333 |
| Nedd4l    | Q8CFI0 | E3 ubiquitin-protein ligase NEDD4-like OS=Mus musculus OX=10090 GN=Nedd4l PE=1 SV=2                | 0.81        |
| Safb      | D3YXK2 | Scaffold attachment factor B1 OS=Mus musculus OX=10090 GN=Safb PE=1 SV=2                           | 0.833333333 |
| Ybx3      | Q9JKB3 | Y-box-binding protein 3 OS=Mus musculus OX=10090 GN=Ybx3 PE=1 SV=2                                 | 0.836666667 |
| Nmt1      | O70310 | Glycylpeptide N-tetradecanoyltransferase 1 OS=Mus musculus OX=10090 GN=Nmt1 PE=1 SV=1              | 0.843333333 |
| Clip2     | Q9Z0H8 | CAP-Gly domain-containing linker protein 2 OS=Mus musculus OX=10090 GN=Clip2 PE=1 SV=2             | 0.973333333 |

|         |        |                                                                                                        |             |
|---------|--------|--------------------------------------------------------------------------------------------------------|-------------|
| Psip1   | Q99JF8 | PC4 and SFRS1-interacting protein OS=Mus musculus OX=10090 GN=Psip1 PE=1 SV=1                          | 0.84        |
| Strn3   | Q9ERG2 | Striatin-3 OS=Mus musculus OX=10090 GN=Strn3 PE=1 SV=1                                                 | 0.83        |
| Pdia6   | Q922R8 | Protein disulfide-isomerase A6 OS=Mus musculus OX=10090 GN=Pdia6 PE=1 SV=3                             | 0.893333333 |
| Prdx2   | Q61171 | Peroxiredoxin-2 OS=Mus musculus OX=10090 GN=Prdx2 PE=1 SV=3                                            | 0.883333333 |
| Pcna    | P17918 | Proliferating cell nuclear antigen OS=Mus musculus OX=10090 GN=Pcna PE=1 SV=2                          | 0.886666667 |
| Epha2   | Q03145 | Ephrin type-A receptor 2 OS=Mus musculus OX=10090 GN=Epha2 PE=1 SV=3                                   | 0.953333333 |
| Arpc1b  | Q9WV32 | Actin-related protein 2/3 complex subunit 1B OS=Mus musculus OX=10090 GN=Arpc1b PE=1 SV=4              | 0.823333333 |
| Cnn2    | Q08093 | Calponin-2 OS=Mus musculus OX=10090 GN=Cnn2 PE=1 SV=1                                                  | 0.86        |
| Actr2   | P61161 | Actin-related protein 2 OS=Mus musculus OX=10090 GN=Actr2 PE=1 SV=1                                    | 0.886666667 |
| Gpc4    | P51655 | Glypican-4 OS=Mus musculus OX=10090 GN=Gpc4 PE=1 SV=2                                                  | 0.86        |
| Hars    | Q61035 | Histidine--tRNA ligase cytoplasmic OS=Mus musculus OX=10090 GN=Hars1 PE=1 SV=2                         | 0.92        |
| Fkbp9   | Q9Z247 | Peptidyl-prolyl cis-trans isomerase FKBP9 OS=Mus musculus OX=10090 GN=Fkbp9 PE=1 SV=1                  | 0.91        |
| Ddx50   | Q99MJ9 | ATP-dependent RNA helicase DDX50 OS=Mus musculus OX=10090 GN=Ddx50 PE=2 SV=1                           | 0.866666667 |
| Cit     | P49025 | Citron Rho-interacting kinase OS=Mus musculus OX=10090 GN=Cit PE=1 SV=3                                | 1.02        |
| Rps6ka4 | Q9Z2B9 | Ribosomal protein S6 kinase alpha-4 OS=Mus musculus OX=10090 GN=Rps6ka4 PE=1 SV=2                      | 0.87        |
| Rplp0   | P14869 | 60S acidic ribosomal protein P0 OS=Mus musculus OX=10090 GN=Rplp0 PE=1 SV=3                            | 0.873333333 |
| Pebp1   | P70296 | Phosphatidylethanolamine-binding protein 1 OS=Mus musculus OX=10090 GN=Pebp1 PE=1 SV=3                 | 0.843333333 |
| Prkcsb  | O08795 | Glucosidase 2 subunit beta OS=Mus musculus OX=10090 GN=Prkcsb PE=1 SV=1                                | 0.886666667 |
| Picalm  | Q7M6Y3 | Phosphatidylinositol-binding clathrin assembly protein OS=Mus musculus OX=10090 GN=Picalm PE=1 SV=1    | 0.873333333 |
| Mtap    | Q9CQ65 | S-methyl-5'-thioadenosine phosphorylase OS=Mus musculus OX=10090 GN=Mtap PE=1 SV=1                     | 0.86        |
| Me1     | P06801 | NADP-dependent malic enzyme OS=Mus musculus OX=10090 GN=Me1 PE=1 SV=2                                  | 0.916666667 |
| Dnaja1  | P63037 | DnaJ homolog subfamily A member 1 OS=Mus musculus OX=10090 GN=Dnaja1 PE=1 SV=1                         | 0.94        |
| Strap   | Q9Z1Z2 | Serine-threonine kinase receptor-associated protein OS=Mus musculus OX=10090 GN=Strap PE=1 SV=1        | 0.92        |
| Sugt1   | Q9CX34 | Protein SGT1 homolog OS=Mus musculus OX=10090 GN=Sugt1 PE=1 SV=3                                       | 0.893333333 |
| Sae1    | Q9R1T2 | SUMO-activating enzyme subunit 1 OS=Mus musculus OX=10090 GN=Sae1 PE=1 SV=1                            | 0.903333333 |
| Psmc6   | P62334 | 26S proteasome regulatory subunit 10B OS=Mus musculus OX=10090 GN=Psmc6 PE=1 SV=1                      | 0.873333333 |
| Uba3    | Q8C878 | NEDD8-activating enzyme E1 catalytic subunit OS=Mus musculus OX=10090 GN=Uba3 PE=1 SV=2                | 0.93        |
| Uqcrc1  | Q9CZ13 | Cytochrome b-c1 complex subunit 1 mitochondrial OS=Mus musculus OX=10090 GN=Uqcrc1 PE=1 SV=1           | 0.89        |
| Dnajc2  | P54103 | DnaJ homolog subfamily C member 2 OS=Mus musculus OX=10090 GN=Dnajc2 PE=1 SV=2                         | 0.92        |
| Psmc14  | O35593 | 26S proteasome non-ATPase regulatory subunit 14 OS=Mus musculus OX=10090 GN=Psmc14 PE=1 SV=1           | 0.88        |
| Prdx6   | O08709 | Peroxiredoxin-6 OS=Mus musculus OX=10090 GN=Prdx6 PE=1 SV=3                                            | 0.833333333 |
| Metap2  | O08663 | Methionine aminopeptidase 2 OS=Mus musculus OX=10090 GN=Metap2 PE=1 SV=1                               | 0.973333333 |
| Hat1    | Q8BY71 | Histone acetyltransferase type B catalytic subunit OS=Mus musculus OX=10090 GN=Hat1 PE=1 SV=1          | 0.866666667 |
| Nsdhl   | Q9R1J0 | Sterol-4-alpha-carboxylate 3-dehydrogenase decarboxylating OS=Mus musculus OX=10090 GN=Nsdhl PE=1 SV=1 | 0.85        |

|          |        |                                                                                             |             |
|----------|--------|---------------------------------------------------------------------------------------------|-------------|
| Srp54    | P14576 | Signal recognition particle 54 kDa protein OS=Mus musculus OX=10090 GN=Srp54 PE=1 SV=2      | 0.876666667 |
| Mcmbp    | Q8R3C0 | Mini-chromosome maintenance complex-binding protein OS=Mus musculus OX=10090 GN=Mcmbp       | 0.88        |
| Swap70   | Q6A028 | Switch-associated protein 70 OS=Mus musculus OX=10090 GN=Swap70 PE=1 SV=2                   | 0.856666667 |
| Bin1     | O08539 | Myc box-dependent-interacting protein 1 OS=Mus musculus OX=10090 GN=Bin1 PE=1 SV=1          | 0.856666667 |
| Wars     | P32921 | Tryptophan--tRNA ligase cytoplasmic OS=Mus musculus OX=10090 GN=Wars1 PE=1 SV=2             | 0.883333333 |
| Rcn1     | Q05186 | Reticulocalbin-1 OS=Mus musculus OX=10090 GN=Rcn1 PE=1 SV=1                                 | 0.913333333 |
| Ehbp1l1  | Q99MS7 | EH domain-binding protein 1-like protein 1 OS=Mus musculus OX=10090 GN=Ehbp1l1 PE=1 SV=1    | 0.833333333 |
| Srm      | Q64674 | Spermidine synthase OS=Mus musculus OX=10090 GN=Srm PE=1 SV=1                               | 0.92        |
| Sun2     | Q8BJS4 | SUN domain-containing protein 2 OS=Mus musculus OX=10090 GN=Sun2 PE=1 SV=3                  | 1.01        |
| Glod4    | Q9CPV4 | Glyoxalase domain-containing protein 4 OS=Mus musculus OX=10090 GN=Glod4 PE=1 SV=1          | 0.886666667 |
| Nfkb2    | Q9WTK5 | Nuclear factor NF-kappa-B p100 subunit OS=Mus musculus OX=10090 GN=Nfkb2 PE=1 SV=1          | 0.8         |
| Utp4     | Q8R2N2 | U3 small nucleolar RNA-associated protein 4 homolog OS=Mus musculus OX=10090 GN=Utp4 PE=2   | 1.013333333 |
| Suc1g2   | Q9Z218 | Succinate--CoA ligase [GDP-forming] subunit beta mitochondrial OS=Mus musculus OX=10090 GN= | 0.91        |
| Ugp2     | Q91ZJ5 | UTP--glucose-1-phosphate uridylyltransferase OS=Mus musculus OX=10090 GN=Ugp2 PE=1 SV=3     | 0.846666667 |
| Washc4   | Q3UMB9 | WASH complex subunit 4 OS=Mus musculus OX=10090 GN=Washc4 PE=1 SV=2                         | 0.906666667 |
| Gnl2     | Q99LH1 | Nucleolar GTP-binding protein 2 OS=Mus musculus OX=10090 GN=Gnl2 PE=1 SV=2                  | 0.873333333 |
| Pbrm1    | Q8BSQ9 | Protein polybromo-1 OS=Mus musculus OX=10090 GN=Pbrm1 PE=1 SV=4                             | 0.84        |
| Ercc6l   | Q8BHK9 | DNA excision repair protein ERCC-6-like OS=Mus musculus OX=10090 GN=Ercc6l PE=1 SV=1        | 0.783333333 |
| Herc4    | Q6PAV2 | Probable E3 ubiquitin-protein ligase HERC4 OS=Mus musculus OX=10090 GN=Herc4 PE=1 SV=2      | 0.84        |
| Wdhd1    | P59328 | WD repeat and HMG-box DNA-binding protein 1 OS=Mus musculus OX=10090 GN=Wdhd1 PE=1 SV=      | 0.793333333 |
| Vwa5a    | Q99KC8 | von Willebrand factor A domain-containing protein 5A OS=Mus musculus OX=10090 GN=Vwa5a PE=  | 0.89        |
| Rpap3    | Q9D706 | RNA polymerase II-associated protein 3 OS=Mus musculus OX=10090 GN=Rpap3 PE=1 SV=1          | 0.826666667 |
| Cip2a    | Q8BWY9 | Protein CIP2A OS=Mus musculus OX=10090 GN=Cip2a PE=1 SV=3                                   | 0.91        |
| Wdr11    | Q8K1X1 | WD repeat-containing protein 11 OS=Mus musculus OX=10090 GN=Wdr11 PE=1 SV=1                 | 0.806666667 |
| Rab3gap2 | Q8BMG7 | Rab3 GTPase-activating protein non-catalytic subunit OS=Mus musculus OX=10090 GN=Rab3gap2   | 0.84        |
| Far1     | Q922J9 | Fatty acyl-CoA reductase 1 OS=Mus musculus OX=10090 GN=Far1 PE=1 SV=1                       | 0.83        |
| Mms19    | Q9D071 | MMS19 nucleotide excision repair protein homolog OS=Mus musculus OX=10090 GN=Mms19 PE=1     | 0.806666667 |
| Hip1     | Q8VD75 | Huntingtin-interacting protein 1 OS=Mus musculus OX=10090 GN=Hip1 PE=1 SV=2                 | 0.85        |
| Ptk2     | P34152 | Focal adhesion kinase 1 OS=Mus musculus OX=10090 GN=Ptk2 PE=1 SV=4                          | 0.896666667 |
| Sec24a   | Q3U2P1 | Protein transport protein Sec24A OS=Mus musculus OX=10090 GN=Sec24a PE=1 SV=1               | 0.843333333 |
| Ltn1     | Q6A009 | E3 ubiquitin-protein ligase listerin OS=Mus musculus OX=10090 GN=Ltn1 PE=1 SV=3             | 0.79        |
| Pnn      | O35691 | Pinin OS=Mus musculus OX=10090 GN=Pnn PE=1 SV=4                                             | 0.956666667 |
| Cdkn2aip | Q8BI72 | CDKN2A-interacting protein OS=Mus musculus OX=10090 GN=Cdkn2aip PE=1 SV=1                   | 0.986666667 |
| Pdlim7   | Q3TJD7 | PDZ and LIM domain protein 7 OS=Mus musculus OX=10090 GN=Pdlim7 PE=1 SV=1                   | 0.916666667 |

|           |        |                                                                                                                          |             |
|-----------|--------|--------------------------------------------------------------------------------------------------------------------------|-------------|
| Rbm28     | Q8CGC6 | RNA-binding protein 28 OS=Mus musculus OX=10090 GN=Rbm28 PE=1 SV=4                                                       | 1.026666667 |
| Tex10     | Q3URQ0 | Testis-expressed protein 10 OS=Mus musculus OX=10090 GN=Tex10 PE=1 SV=1                                                  | 0.97        |
| Casp8     | O89110 | Caspase-8 OS=Mus musculus OX=10090 GN=Casp8 PE=1 SV=1                                                                    | 0.853333333 |
| Cul5      | Q9D5V5 | Cullin-5 OS=Mus musculus OX=10090 GN=Cul5 PE=1 SV=3                                                                      | 0.753333333 |
| Ndufv1    | Q91YT0 | NADH dehydrogenase [ubiquinone] flavoprotein 1 mitochondrial OS=Mus musculus OX=10090 GN=Ndufv1 PE=1 SV=1                | 0.913333333 |
| Dnajc10   | Q9DC23 | DnaJ homolog subfamily C member 10 OS=Mus musculus OX=10090 GN=Dnajc10 PE=1 SV=2                                         | 0.873333333 |
| Prkar1a   | Q9DBC7 | cAMP-dependent protein kinase type I-alpha regulatory subunit OS=Mus musculus OX=10090 GN=Prkar1a PE=1 SV=1              | 0.83        |
| Asap1     | Q9QWY8 | Arf-GAP with SH3 domain ANK repeat and PH domain-containing protein 1 OS=Mus musculus OX=10090 GN=Asap1 PE=1 SV=1        | 0.84        |
| Stt3a     | P46978 | Dolichyl-diphosphooligosaccharide--protein glycosyltransferase subunit STT3A OS=Mus musculus OX=10090 GN=Stt3a PE=1 SV=1 | 0.853333333 |
| Aco1      | P28271 | Cytoplasmic aconitate hydratase OS=Mus musculus OX=10090 GN=Aco1 PE=1 SV=3                                               | 0.86        |
| Rbm12     | Q8R4X3 | RNA-binding protein 12 OS=Mus musculus OX=10090 GN=Rbm12 PE=1 SV=3                                                       | 0.923333333 |
| Hist2h2ab | Q64522 | Histone H2A type 2-B OS=Mus musculus OX=10090 GN=H2ac21 PE=1 SV=3                                                        | 0.87        |
| Stk3      | Q9JI10 | Serine/threonine-protein kinase 3 OS=Mus musculus OX=10090 GN=Stk3 PE=1 SV=1                                             | 0.85        |
| Klc1      | O88447 | Kinesin light chain 1 OS=Mus musculus OX=10090 GN=Klc1 PE=1 SV=3                                                         | 0.836666667 |
| Akt1      | P31750 | RAC-alpha serine/threonine-protein kinase OS=Mus musculus OX=10090 GN=Akt1 PE=1 SV=2                                     | 0.883333333 |
| Tpm4      | Q6IRU2 | Tropomyosin alpha-4 chain OS=Mus musculus OX=10090 GN=Tpm4 PE=1 SV=3                                                     | 0.896666667 |
| G3bp2     | P97379 | Ras GTPase-activating protein-binding protein 2 OS=Mus musculus OX=10090 GN=G3bp2 PE=1 SV=1                              | 0.91        |
| Igf2bp1   | O88477 | Insulin-like growth factor 2 mRNA-binding protein 1 OS=Mus musculus OX=10090 GN=Igf2bp1 PE=1 SV=1                        | 0.83        |
| Ctps2     | P70303 | CTP synthase 2 OS=Mus musculus OX=10090 GN=Ctps2 PE=1 SV=1                                                               | 0.81        |
| Cdk1      | P11440 | Cyclin-dependent kinase 1 OS=Mus musculus OX=10090 GN=Cdk1 PE=1 SV=3                                                     | 0.87        |
| Osbp      | Q3B7Z2 | Oxysterol-binding protein 1 OS=Mus musculus OX=10090 GN=Osbp PE=1 SV=3                                                   | 0.896666667 |
| Plod1     | Q9R0E2 | Procollagen-lysine 2-oxoglutarate 5-dioxygenase 1 OS=Mus musculus OX=10090 GN=Plod1 PE=1 SV=1                            | 0.946666667 |
| Triobp    | Q99KW3 | TRIO and F-actin-binding protein OS=Mus musculus OX=10090 GN=Triobp PE=1 SV=3                                            | 0.853333333 |
| Bclaf1    | Q8K019 | Bcl-2-associated transcription factor 1 OS=Mus musculus OX=10090 GN=Bclaf1 PE=1 SV=2                                     | 0.816666667 |
| Dync1li1  | Q8R1Q8 | Cytoplasmic dynein 1 light intermediate chain 1 OS=Mus musculus OX=10090 GN=Dync1li1 PE=1 SV=1                           | 0.823333333 |
| Las1l     | A2BE28 | Ribosomal biogenesis protein LAS1L OS=Mus musculus OX=10090 GN=Las1l PE=1 SV=1                                           | 0.65        |
| Marcks    | P26645 | Myristoylated alanine-rich C-kinase substrate OS=Mus musculus OX=10090 GN=Marcks PE=1 SV=2                               | 0.733333333 |
| Cops4     | O88544 | COP9 signalosome complex subunit 4 OS=Mus musculus OX=10090 GN=Cops4 PE=1 SV=1                                           | 0.88        |
| Oat       | P29758 | Ornithine aminotransferase mitochondrial OS=Mus musculus OX=10090 GN=Oat PE=1 SV=1                                       | 0.916666667 |
| Lman1     | Q9D0F3 | Protein ERGIC-53 OS=Mus musculus OX=10090 GN=Lman1 PE=1 SV=1                                                             | 0.913333333 |
| Cavin1    | O54724 | Caveolae-associated protein 1 OS=Mus musculus OX=10090 GN=Cavin1 PE=1 SV=1                                               | 0.85        |
| Pelp1     | Q9DBD5 | Proline- glutamic acid- and leucine-rich protein 1 OS=Mus musculus OX=10090 GN=Pelp1 PE=1 SV=1                           | 0.823333333 |
| Cttn      | Q60598 | Src substrate cortactin OS=Mus musculus OX=10090 GN=Cttn PE=1 SV=2                                                       | 0.89        |
| Napa      | Q9DB05 | Alpha-soluble NSF attachment protein OS=Mus musculus OX=10090 GN=Napa PE=1 SV=1                                          | 0.88        |



|          |        |                                                                                                  |             |
|----------|--------|--------------------------------------------------------------------------------------------------|-------------|
| Ints3    | Q7TPD0 | Integrator complex subunit 3 OS=Mus musculus OX=10090 GN=Ints3 PE=1 SV=2                         | 0.91        |
| Pus7     | Q91VU7 | Pseudouridylate synthase 7 homolog OS=Mus musculus OX=10090 GN=Pus7 PE=2 SV=2                    | 0.88666667  |
| Cacybp   | Q9CXW3 | Calcyclin-binding protein OS=Mus musculus OX=10090 GN=Cacybp PE=1 SV=1                           | 0.883333333 |
| Poglut2  | Q9JHP7 | Protein O-glucosyltransferase 2 OS=Mus musculus OX=10090 GN=Poglut2 PE=1 SV=1                    | 0.86        |
| Agps     | Q8C0I1 | Alkyldihydroxyacetonephosphate synthase peroxisomal OS=Mus musculus OX=10090 GN=Agps PE=         | 0.88        |
| Heatr3   | Q8BQM4 | HEAT repeat-containing protein 3 OS=Mus musculus OX=10090 GN=Heatr3 PE=1 SV=1                    | 0.88        |
| Cndp2    | Q9D1A2 | Cytosolic non-specific dipeptidase OS=Mus musculus OX=10090 GN=Cndp2 PE=1 SV=1                   | 0.853333333 |
| Pml      | Q60953 | Protein PML OS=Mus musculus OX=10090 GN=Pml PE=1 SV=3                                            | 0.896666667 |
| Nae1     | Q8VBW6 | NEDD8-activating enzyme E1 regulatory subunit OS=Mus musculus OX=10090 GN=Nae1 PE=1 SV=1         | 0.926666667 |
| Kdm1a    | Q6ZQ88 | Lysine-specific histone demethylase 1A OS=Mus musculus OX=10090 GN=Kdm1a PE=1 SV=2               | 0.853333333 |
| Rb1cc1   | Q9ESK9 | RB1-inducible coiled-coil protein 1 OS=Mus musculus OX=10090 GN=Rb1cc1 PE=1 SV=3                 | 0.93        |
| Wdr75    | Q3U821 | WD repeat-containing protein 75 OS=Mus musculus OX=10090 GN=Wdr75 PE=1 SV=1                      | 0.82        |
| Ccar1    | Q8CH18 | Cell division cycle and apoptosis regulator protein 1 OS=Mus musculus OX=10090 GN=Ccar1 PE=1 SV= | 0.813333333 |
| Maoa     | Q64133 | Amine oxidase [flavin-containing] A OS=Mus musculus OX=10090 GN=Maoa PE=1 SV=3                   | 0.813333333 |
| Nup188   | Q6ZQH8 | Nucleoporin NUP188 homolog OS=Mus musculus OX=10090 GN=Nup188 PE=1 SV=2                          | 0.916666667 |
| Cebpz    | P53569 | CCAAT/enhancer-binding protein zeta OS=Mus musculus OX=10090 GN=Cebpz PE=1 SV=2                  | 0.863333333 |
| Hnrnpul1 | Q8VDM6 | Heterogeneous nuclear ribonucleoprotein U-like protein 1 OS=Mus musculus OX=10090 GN=Hnrnp       | 0.896666667 |
| Ube2o    | Q6ZPJ3 | (E3-independent) E2 ubiquitin-conjugating enzyme UBE2O OS=Mus musculus OX=10090 GN=Ube2c         | 0.823333333 |
| Cdc40    | Q9DC48 | Pre-mRNA-processing factor 17 OS=Mus musculus OX=10090 GN=Cdc40 PE=2 SV=1                        | 0.843333333 |
| Specc1l  | Q2KN98 | Cytospin-A OS=Mus musculus OX=10090 GN=Specc1l PE=1 SV=1                                         | 0.726666667 |
| Lrrc8c   | Q8R502 | Volume-regulated anion channel subunit LRRC8C OS=Mus musculus OX=10090 GN=Lrrc8c PE=1 SV=        | 0.86        |
| Diaph1   | O08808 | Protein diaphanous homolog 1 OS=Mus musculus OX=10090 GN=Diaph1 PE=1 SV=1                        | 1           |
| Prpf4    | Q9DAW6 | U4/U6 small nuclear ribonucleoprotein Prp4 OS=Mus musculus OX=10090 GN=Prpf4 PE=1 SV=1           | 0.916666667 |
| Eefsec   | Q9JHW4 | Selenocysteine-specific elongation factor OS=Mus musculus OX=10090 GN=Eefsec PE=1 SV=2           | 0.863333333 |
| Gigyf2   | Q6Y7W8 | GRB10-interacting GYF protein 2 OS=Mus musculus OX=10090 GN=Gigyf2 PE=1 SV=2                     | 0.83        |
| Ogfr     | Q99PG2 | Opioid growth factor receptor OS=Mus musculus OX=10090 GN=Ogfr PE=1 SV=1                         | 0.86        |
| Thoc1    | Q8R3N6 | THO complex subunit 1 OS=Mus musculus OX=10090 GN=Thoc1 PE=1 SV=1                                | 0.803333333 |
| Vps35l   | Q8BWQ6 | VPS35 endosomal protein sorting factor-like OS=Mus musculus OX=10090 GN=Vps35l PE=1 SV=2         | 0.976666667 |
| Rad21    | Q61550 | Double-strand-break repair protein rad21 homolog OS=Mus musculus OX=10090 GN=Rad21 PE=1 SV=      | 0.906666667 |
| Ddx27    | Q921N6 | Probable ATP-dependent RNA helicase DDX27 OS=Mus musculus OX=10090 GN=Ddx27 PE=1 SV=3            | 0.866666667 |
| Rrp1b    | Q91YK2 | Ribosomal RNA processing protein 1 homolog B OS=Mus musculus OX=10090 GN=Rrp1b PE=1 SV=2         | 0.863333333 |
| Tjp2     | Q9ZOU1 | Tight junction protein ZO-2 OS=Mus musculus OX=10090 GN=Tjp2 PE=1 SV=2                           | 0.923333333 |
| Pc       | Q05920 | Pyruvate carboxylase mitochondrial OS=Mus musculus OX=10090 GN=Pc PE=1 SV=1                      | 0.933333333 |
| Uhrf1    | Q8VDF2 | E3 ubiquitin-protein ligase UHRF1 OS=Mus musculus OX=10090 GN=Uhrf1 PE=1 SV=2                    | 0.856666667 |

|          |        |                                                                                                  |             |
|----------|--------|--------------------------------------------------------------------------------------------------|-------------|
| Cstf3    | Q99LI7 | Cleavage stimulation factor subunit 3 OS=Mus musculus OX=10090 GN=Cstf3 PE=1 SV=1                | 0.82        |
| Itga5    | P11688 | Integrin alpha-5 OS=Mus musculus OX=10090 GN=Itga5 PE=1 SV=3                                     | 0.943333333 |
| Ahcyl1   | Q80SW1 | S-adenosylhomocysteine hydrolase-like protein 1 OS=Mus musculus OX=10090 GN=Ahcyl1 PE=1 SV=      | 0.873333333 |
| Map2k2   | Q63932 | Dual specificity mitogen-activated protein kinase kinase 2 OS=Mus musculus OX=10090 GN=Map2k     | 0.876666667 |
| H2afy    | Q9QZQ8 | Core histone macro-H2A.1 OS=Mus musculus OX=10090 GN=Macroh2a1 PE=1 SV=3                         | 0.926666667 |
| Igf2bp3  | Q9CPN8 | Insulin-like growth factor 2 mRNA-binding protein 3 OS=Mus musculus OX=10090 GN=Igf2bp3 PE=1     | 0.87        |
| Prdx1    | P35700 | Peroxiredoxin-1 OS=Mus musculus OX=10090 GN=Prdx1 PE=1 SV=1                                      | 0.866666667 |
| Plod3    | Q9R0E1 | Multifunctional procollagen lysine hydroxylase and glycosyltransferase LH3 OS=Mus musculus OX=1  | 0.856666667 |
| Igf2bp2  | Q5SF07 | Insulin-like growth factor 2 mRNA-binding protein 2 OS=Mus musculus OX=10090 GN=Igf2bp2 PE=1     | 0.916666667 |
| Eif4b    | Q8BGD9 | Eukaryotic translation initiation factor 4B OS=Mus musculus OX=10090 GN=Eif4b PE=1 SV=1          | 0.83        |
| Sart1    | Q9Z315 | U4/U6.U5 tri-snRNP-associated protein 1 OS=Mus musculus OX=10090 GN=Sart1 PE=1 SV=1              | 0.803333333 |
| Aak1     | Q3UHQ0 | AP2-associated protein kinase 1 OS=Mus musculus OX=10090 GN=Aak1 PE=1 SV=2                       | 0.903333333 |
| Pdgfrb   | P05622 | Platelet-derived growth factor receptor beta OS=Mus musculus OX=10090 GN=Pdgfrb PE=1 SV=2        | 0.8         |
| Nln      | Q91YP2 | Neurolysin mitochondrial OS=Mus musculus OX=10090 GN=Nln PE=1 SV=1                               | 0.933333333 |
| Fkbp10   | Q61576 | Peptidyl-prolyl cis-trans isomerase FKBP10 OS=Mus musculus OX=10090 GN=Fkbp10 PE=1 SV=2          | 0.936666667 |
| Tomm70   | Q9CZW5 | Mitochondrial import receptor subunit TOM70 OS=Mus musculus OX=10090 GN=Tomm70 PE=1 SV           | 0.893333333 |
| Pnp      | P23492 | Purine nucleoside phosphorylase OS=Mus musculus OX=10090 GN=Pnp PE=1 SV=2                        | 0.863333333 |
| Rpl5     | P47962 | 60S ribosomal protein L5 OS=Mus musculus OX=10090 GN=Rpl5 PE=1 SV=3                              | 0.956666667 |
| Emilin1  | Q99K41 | EMILIN-1 OS=Mus musculus OX=10090 GN=Emilin1 PE=1 SV=1                                           | 0.9         |
| Cs       | Q9CZU6 | Citrate synthase mitochondrial OS=Mus musculus OX=10090 GN=Cs PE=1 SV=1                          | 0.926666667 |
| Eif3i    | Q9QZD9 | Eukaryotic translation initiation factor 3 subunit I OS=Mus musculus OX=10090 GN=Eif3i PE=1 SV=1 | 0.906666667 |
| Ftsj3    | Q9DBE9 | pre-rRNA 2'-O-ribose RNA methyltransferase FTSJ3 OS=Mus musculus OX=10090 GN=Ftsj3 PE=1 SV=1     | 0.876666667 |
| Txnl1    | Q8CDN6 | Thioredoxin-like protein 1 OS=Mus musculus OX=10090 GN=Txnl1 PE=1 SV=3                           | 0.92        |
| Hmgcs1   | Q8JZK9 | Hydroxymethylglutaryl-CoA synthase cytoplasmic OS=Mus musculus OX=10090 GN=Hmgcs1 PE=1           | 0.88        |
| Atp6v1b2 | P62814 | V-type proton ATPase subunit B brain isoform OS=Mus musculus OX=10090 GN=Atp6v1b2 PE=1 SV=       | 0.886666667 |
| Pafah1b1 | P63005 | Platelet-activating factor acetylhydrolase IB subunit alpha OS=Mus musculus OX=10090 GN=Pafah1   | 0.856666667 |
| Etf1     | Q8BWY3 | Eukaryotic peptide chain release factor subunit 1 OS=Mus musculus OX=10090 GN=Etf1 PE=1 SV=4     | 0.893333333 |
| Grb10    | Q60760 | Growth factor receptor-bound protein 10 OS=Mus musculus OX=10090 GN=Grb10 PE=1 SV=2              | 0.843333333 |
| Abcc1    | O35379 | Multidrug resistance-associated protein 1 OS=Mus musculus OX=10090 GN=Abcc1 PE=1 SV=1            | 0.963333333 |
| Atp6v1a  | P50516 | V-type proton ATPase catalytic subunit A OS=Mus musculus OX=10090 GN=Atp6v1a PE=1 SV=2           | 0.93        |
| Exoc4    | O35382 | Exocyst complex component 4 OS=Mus musculus OX=10090 GN=Exoc4 PE=1 SV=2                          | 0.973333333 |
| Acadvl   | P50544 | Very long-chain specific acyl-CoA dehydrogenase mitochondrial OS=Mus musculus OX=10090 GN=       | 0.856666667 |
| Ipo11    | Q8K2V6 | Importin-11 OS=Mus musculus OX=10090 GN=Ipo11 PE=1 SV=1                                          | 0.833333333 |
| Cyp51a1  | Q8K0C4 | Lanosterol 14-alpha demethylase OS=Mus musculus OX=10090 GN=Cyp51a1 PE=1 SV=1                    | 0.866666667 |

|          |        |                                                                                              |             |
|----------|--------|----------------------------------------------------------------------------------------------|-------------|
| Asah1    | Q9WV54 | Acid ceramidase OS=Mus musculus OX=10090 GN=Asah1 PE=1 SV=1                                  | 0.86        |
| Xpnpep1  | Q6P1B1 | Xaa-Pro aminopeptidase 1 OS=Mus musculus OX=10090 GN=Xpnpep1 PE=1 SV=1                       | 0.863333333 |
| Ubap2    | Q91VX2 | Ubiquitin-associated protein 2 OS=Mus musculus OX=10090 GN=Ubap2 PE=1 SV=1                   | 0.756666667 |
| Mogs     | Q80UM7 | Mannosyl-oligosaccharide glucosidase OS=Mus musculus OX=10090 GN=Mogs PE=1 SV=1              | 0.836666667 |
| Ero1a    | Q8R180 | ERO1-like protein alpha OS=Mus musculus OX=10090 GN=Ero1a PE=1 SV=2                          | 0.886666667 |
| Elp2     | Q91WG4 | Elongator complex protein 2 OS=Mus musculus OX=10090 GN=Elp2 PE=1 SV=1                       | 1.08        |
| Ap1g1    | P22892 | AP-1 complex subunit gamma-1 OS=Mus musculus OX=10090 GN=Ap1g1 PE=1 SV=3                     | 0.94        |
| Mdc1     | Q5PSV9 | Mediator of DNA damage checkpoint protein 1 OS=Mus musculus OX=10090 GN=Mdc1 PE=1 SV=1       | 0.766666667 |
| Scyl1    | Q9EQC5 | N-terminal kinase-like protein OS=Mus musculus OX=10090 GN=Scyl1 PE=1 SV=1                   | 0.88        |
| Asph     | Q8BSY0 | Aspartyl/asparaginyl beta-hydroxylase OS=Mus musculus OX=10090 GN=Asph PE=1 SV=1             | 0.91        |
| Exosc10  | P56960 | Exosome component 10 OS=Mus musculus OX=10090 GN=Exosc10 PE=1 SV=2                           | 0.846666667 |
| Ap2m1    | P84091 | AP-2 complex subunit mu OS=Mus musculus OX=10090 GN=Ap2m1 PE=1 SV=1                          | 0.853333333 |
| Ssrp1    | Q08943 | FACT complex subunit SSRP1 OS=Mus musculus OX=10090 GN=Ssrp1 PE=1 SV=2                       | 0.903333333 |
| Ilk      | O55222 | Integrin-linked protein kinase OS=Mus musculus OX=10090 GN=Ilk PE=1 SV=2                     | 0.85        |
| Colgalt1 | Q8K297 | Procollagen galactosyltransferase 1 OS=Mus musculus OX=10090 GN=Colgalt1 PE=1 SV=2           | 0.886666667 |
| Kntc1    | Q8C3Y4 | Kinetochore-associated protein 1 OS=Mus musculus OX=10090 GN=Kntc1 PE=1 SV=2                 | 1.003333333 |
| Usp34    | Q6ZQ93 | Ubiquitin carboxyl-terminal hydrolase 34 OS=Mus musculus OX=10090 GN=Usp34 PE=1 SV=3         | 0.82        |
| Actr1a   | P61164 | Alpha-centractin OS=Mus musculus OX=10090 GN=Actr1a PE=1 SV=1                                | 0.92        |
| Eno3     | P21550 | Beta-enolase OS=Mus musculus OX=10090 GN=Eno3 PE=1 SV=3                                      | 0.773333333 |
| Tnpo2    | Q99LG2 | Transportin-2 OS=Mus musculus OX=10090 GN=Tnpo2 PE=1 SV=1                                    | 0.893333333 |
| Rbbp4    | Q60972 | Histone-binding protein RBBP4 OS=Mus musculus OX=10090 GN=Rbbp4 PE=1 SV=5                    | 0.87        |
| Arfgef2  | A2A5R2 | Brefeldin A-inhibited guanine nucleotide-exchange protein 2 OS=Mus musculus OX=10090 GN=Arfg | 0.836666667 |
| Eef1d    | P57776 | Elongation factor 1-delta OS=Mus musculus OX=10090 GN=Eef1d PE=1 SV=3                        | 0.89        |
| Vdac1    | Q60932 | Voltage-dependent anion-selective channel protein 1 OS=Mus musculus OX=10090 GN=Vdac1 PE=1   | 0.9         |
| Sec23ip  | Q6NZC7 | SEC23-interacting protein OS=Mus musculus OX=10090 GN=Sec23ip PE=1 SV=2                      | 0.9         |
| Nap1l1   | P28656 | Nucleosome assembly protein 1-like 1 OS=Mus musculus OX=10090 GN=Nap1l1 PE=1 SV=2            | 0.836666667 |
| Kank2    | Q8BX02 | KN motif and ankyrin repeat domain-containing protein 2 OS=Mus musculus OX=10090 GN=Kank2    | 0.93        |
| Tubgcp2  | Q921G8 | Gamma-tubulin complex component 2 OS=Mus musculus OX=10090 GN=Tubgcp2 PE=1 SV=2              | 0.963333333 |
| Tns3     | Q5SSZ5 | Tensin-3 OS=Mus musculus OX=10090 GN=Tns3 PE=1 SV=1                                          | 0.806666667 |
| Uap1l1   | Q3TW96 | UDP-N-acetylhexosamine pyrophosphorylase-like protein 1 OS=Mus musculus OX=10090 GN=Uap1     | 0.87        |
| Ubap2l   | Q80X50 | Ubiquitin-associated protein 2-like OS=Mus musculus OX=10090 GN=Ubap2l PE=1 SV=1             | 0.866666667 |
| Pgd      | Q9DCD0 | 6-phosphogluconate dehydrogenase decarboxylating OS=Mus musculus OX=10090 GN=Pgd PE=1 S'     | 0.866666667 |
| NARS1    | Q8BP47 | Asparagine--tRNA ligase cytoplasmic OS=Mus musculus OX=10090 GN=NARS1 PE=1 SV=2              | 0.89        |
| Rcc2     | Q8BK67 | Protein RCC2 OS=Mus musculus OX=10090 GN=Rcc2 PE=1 SV=1                                      | 0.866666667 |

|          |        |                                                                                                                                           |
|----------|--------|-------------------------------------------------------------------------------------------------------------------------------------------|
| Oxct1    | Q9D0K2 | Succinyl-CoA:3-ketoacid coenzyme A transferase 1 mitochondrial OS=Mus musculus OX=10090 GN=0.893333333                                    |
| Rtcb     | Q99LF4 | RNA-splicing ligase RtcB homolog OS=Mus musculus OX=10090 GN=Rtcb PE=1 SV=1 0.866666667                                                   |
| Umps     | P13439 | Uridine 5'-monophosphate synthase OS=Mus musculus OX=10090 GN=Umps PE=1 SV=3 0.873333333                                                  |
| Rpl8     | P62918 | 60S ribosomal protein L8 OS=Mus musculus OX=10090 GN=Rpl8 PE=1 SV=2 0.946666667                                                           |
| Eif2s1   | Q6ZWX6 | Eukaryotic translation initiation factor 2 subunit 1 OS=Mus musculus OX=10090 GN=Eif2s1 PE=1 SV=0.893333333                               |
| Scfd1    | Q8BRF7 | Sec1 family domain-containing protein 1 OS=Mus musculus OX=10090 GN=Scfd1 PE=1 SV=1 0.853333333                                           |
| Acot9    | Q9R0X4 | Acyl-coenzyme A thioesterase 9 mitochondrial OS=Mus musculus OX=10090 GN=Acot9 PE=1 SV=1 0.866666667                                      |
| Bag3     | Q9JLV1 | BAG family molecular chaperone regulator 3 OS=Mus musculus OX=10090 GN=Bag3 PE=1 SV=2 0.803333333                                         |
| Nudc     | O35685 | Nuclear migration protein nudC OS=Mus musculus OX=10090 GN=Nudc PE=1 SV=1 0.846666667                                                     |
| Psmd5    | Q8BJY1 | 26S proteasome non-ATPase regulatory subunit 5 OS=Mus musculus OX=10090 GN=Psmd5 PE=1 SV=0.913333333                                      |
| Eif5     | P59325 | Eukaryotic translation initiation factor 5 OS=Mus musculus OX=10090 GN=Eif5 PE=1 SV=1 0.866666667                                         |
| Zw10     | O54692 | Centromere/kinetochore protein zw10 homolog OS=Mus musculus OX=10090 GN=Zw10 PE=1 SV=3 0.88                                               |
| Zc3hav1  | Q3UPF5 | Zinc finger CCCH-type antiviral protein 1 OS=Mus musculus OX=10090 GN=Zc3hav1 PE=1 SV=1 0.93                                              |
| Aifm1    | Q9Z0X1 | Apoptosis-inducing factor 1 mitochondrial OS=Mus musculus OX=10090 GN=Aifm1 PE=1 SV=1 0.906666667                                         |
| Hnrnpul2 | Q00PI9 | Heterogeneous nuclear ribonucleoprotein U-like protein 2 OS=Mus musculus OX=10090 GN=Hnrnp 0.836666667                                    |
| Myo18a   | Q9JMH9 | Unconventional myosin-XVIIIa OS=Mus musculus OX=10090 GN=Myo18a PE=1 SV=2 0.883333333                                                     |
| Nucb1    | Q02819 | Nucleobindin-1 OS=Mus musculus OX=10090 GN=Nucb1 PE=1 SV=2 0.853333333                                                                    |
| Obsl1    | D3YYU8 | Obscurin-like protein 1 OS=Mus musculus OX=10090 GN=Obsl1 PE=1 SV=1 0.783333333                                                           |
| Sh3kbp1  | Q8R550 | SH3 domain-containing kinase-binding protein 1 OS=Mus musculus OX=10090 GN=Sh3kbp1 PE=1 SV=0.833333333                                    |
| Wdr43    | Q6ZQL4 | WD repeat-containing protein 43 OS=Mus musculus OX=10090 GN=Wdr43 PE=1 SV=2 0.953333333                                                   |
| Rin1     | Q921Q7 | Ras and Rab interactor 1 OS=Mus musculus OX=10090 GN=Rin1 PE=1 SV=1 0.783333333                                                           |
| Rpl7     | P14148 | 60S ribosomal protein L7 OS=Mus musculus OX=10090 GN=Rpl7 PE=1 SV=2 0.906666667                                                           |
| Plcg1    | Q62077 | 1-phosphatidylinositol 4 5-bisphosphate phosphodiesterase gamma-1 OS=Mus musculus OX=10090 GN=Plcg1 PE=1 SV=0.923333333                   |
| Sacm1l   | Q9EP69 | Phosphatidylinositol-3-phosphatase SAC1 OS=Mus musculus OX=10090 GN=Sacm1l PE=1 SV=1 0.86                                                 |
| Tsr1     | Q5SWD9 | Pre-rRNA-processing protein TSR1 homolog OS=Mus musculus OX=10090 GN=Tsr1 PE=1 SV=1 1.186666667                                           |
| Pold1    | P52431 | DNA polymerase delta catalytic subunit OS=Mus musculus OX=10090 GN=Pold1 PE=1 SV=2 0.816666667                                            |
| Arhgef40 | Q3UPH7 | Rho guanine nucleotide exchange factor 40 OS=Mus musculus OX=10090 GN=Arhgef40 PE=1 SV=1 0.816666667                                      |
| Tpm1     | P58771 | Tropomyosin alpha-1 chain OS=Mus musculus OX=10090 GN=Tpm1 PE=1 SV=1 0.853333333                                                          |
| Gspt1    | Q8R050 | Eukaryotic peptide chain release factor GTP-binding subunit ERF3A OS=Mus musculus OX=10090 GN=Gspt1 PE=1 SV=0.84                          |
| Ppp2r2a  | Q6P1F6 | Serine/threonine-protein phosphatase 2A 55 kDa regulatory subunit B alpha isoform OS=Mus musculus OX=10090 GN=Ppp2r2a PE=1 SV=0.923333333 |
| Pak2     | Q8CIN4 | Serine/threonine-protein kinase PAK 2 OS=Mus musculus OX=10090 GN=Pak2 PE=1 SV=1 0.85                                                     |
| Gdi1     | P50396 | Rab GDP dissociation inhibitor alpha OS=Mus musculus OX=10090 GN=Gdi1 PE=1 SV=3 0.826666667                                               |
| Ybx1     | P62960 | Y-box-binding protein 1 OS=Mus musculus OX=10090 GN=Ybx1 PE=1 SV=3 0.87                                                                   |
| Txndc5   | Q91W90 | Thioredoxin domain-containing protein 5 OS=Mus musculus OX=10090 GN=Txndc5 PE=1 SV=2 0.876666667                                          |

|         |        |                                                                                                 |             |
|---------|--------|-------------------------------------------------------------------------------------------------|-------------|
| Copg2   | Q9QXK3 | Coatomer subunit gamma-2 OS=Mus musculus OX=10090 GN=Copg2 PE=1 SV=1                            | 0.793333333 |
| Ywhae   | P62259 | 14-3-3 protein epsilon OS=Mus musculus OX=10090 GN=Ywhae PE=1 SV=1                              | 0.903333333 |
| Septin2 | P42208 | Septin-2 OS=Mus musculus OX=10090 GN=Septin2 PE=1 SV=2                                          | 0.873333333 |
| Psmc1   | P62192 | 26S proteasome regulatory subunit 4 OS=Mus musculus OX=10090 GN=Psmc1 PE=1 SV=1                 | 0.876666667 |
| Ruvbl1  | P60122 | RuvB-like 1 OS=Mus musculus OX=10090 GN=Ruvbl1 PE=1 SV=1                                        | 0.883333333 |
| Eps15l1 | Q60902 | Epidermal growth factor receptor substrate 15-like 1 OS=Mus musculus OX=10090 GN=Eps15l1 PE=    | 0.913333333 |
| Prpf40a | Q9R1C7 | Pre-mRNA-processing factor 40 homolog A OS=Mus musculus OX=10090 GN=Prpf40a PE=1 SV=1           | 0.896666667 |
| Tmtc3   | Q8BRH0 | Protein O-mannosyl-transferase TMTC3 OS=Mus musculus OX=10090 GN=Tmtc3 PE=1 SV=2                | 0.776666667 |
| Acsl3   | Q9CZW4 | Long-chain-fatty-acid--CoA ligase 3 OS=Mus musculus OX=10090 GN=Acsl3 PE=1 SV=2                 | 0.873333333 |
| Mdh2    | P08249 | Malate dehydrogenase mitochondrial OS=Mus musculus OX=10090 GN=Mdh2 PE=1 SV=3                   | 0.886666667 |
| Rpsa    | P14206 | 40S ribosomal protein SA OS=Mus musculus OX=10090 GN=Rpsa PE=1 SV=4                             | 0.876666667 |
| Tpi1    | P17751 | Triosephosphate isomerase OS=Mus musculus OX=10090 GN=Tpi1 PE=1 SV=4                            | 0.846666667 |
| Ahcy    | P50247 | Adenosylhomocysteinase OS=Mus musculus OX=10090 GN=Ahcy PE=1 SV=3                               | 0.876666667 |
| Cops3   | O88543 | COP9 signalosome complex subunit 3 OS=Mus musculus OX=10090 GN=Cops3 PE=1 SV=3                  | 0.906666667 |
| Rangap1 | P46061 | Ran GTPase-activating protein 1 OS=Mus musculus OX=10090 GN=Rangap1 PE=1 SV=2                   | 0.906666667 |
| Cast    | P51125 | Calpastatin OS=Mus musculus OX=10090 GN=Cast PE=1 SV=2                                          | 0.826666667 |
| Rps3a   | P97351 | 40S ribosomal protein S3a OS=Mus musculus OX=10090 GN=Rps3a PE=1 SV=3                           | 0.936666667 |
| Eif2s3x | Q9Z0N1 | Eukaryotic translation initiation factor 2 subunit 3 X-linked OS=Mus musculus OX=10090 GN=Eif2s | 0.876666667 |
| Dnaja2  | Q9QYJ0 | DnaJ homolog subfamily A member 2 OS=Mus musculus OX=10090 GN=Dnaja2 PE=1 SV=1                  | 0.903333333 |
| Eif3d   | O70194 | Eukaryotic translation initiation factor 3 subunit D OS=Mus musculus OX=10090 GN=Eif3d PE=1 SV= | 0.916666667 |
| Fdps    | Q920E5 | Farnesyl pyrophosphate synthase OS=Mus musculus OX=10090 GN=Fdps PE=1 SV=1                      | 0.876666667 |
| Anxa5   | P48036 | Annexin A5 OS=Mus musculus OX=10090 GN=Anxa5 PE=1 SV=1                                          | 0.87        |
| Pgm1    | Q9D0F9 | Phosphoglucomutase-1 OS=Mus musculus OX=10090 GN=Pgm1 PE=1 SV=4                                 | 0.88        |
| Tcerg1  | Q8CGF7 | Transcription elongation regulator 1 OS=Mus musculus OX=10090 GN=Tcerg1 PE=1 SV=2               | 0.883333333 |
| Rbm25   | B2RY56 | RNA-binding protein 25 OS=Mus musculus OX=10090 GN=Rbm25 PE=1 SV=2                              | 0.863333333 |
| Abcf2   | Q99LE6 | ATP-binding cassette sub-family F member 2 OS=Mus musculus OX=10090 GN=Abcf2 PE=1 SV=1          | 0.886666667 |
| Dhx36   | Q8VHK9 | ATP-dependent DNA/RNA helicase DHX36 OS=Mus musculus OX=10090 GN=Dhx36 PE=1 SV=2                | 0.856666667 |
| Eif3e   | P60229 | Eukaryotic translation initiation factor 3 subunit E OS=Mus musculus OX=10090 GN=Eif3e PE=1 SV= | 0.883333333 |
| Afdn    | Q9QZQ1 | Afadin OS=Mus musculus OX=10090 GN=Afdn PE=1 SV=3                                               | 0.89        |
| Dock1   | Q8BUR4 | Dedicator of cytokinesis protein 1 OS=Mus musculus OX=10090 GN=Dock1 PE=1 SV=3                  | 0.94        |
| Ubtf    | P25976 | Nucleolar transcription factor 1 OS=Mus musculus OX=10090 GN=Ubtf PE=1 SV=1                     | 0.853333333 |
| Psmd6   | Q99JI4 | 26S proteasome non-ATPase regulatory subunit 6 OS=Mus musculus OX=10090 GN=Psmd6 PE=1 SV=       | 0.87        |
| Nop14   | Q8R3N1 | Nucleolar protein 14 OS=Mus musculus OX=10090 GN=Nop14 PE=1 SV=2                                | 0.94        |
| Nvl     | Q9DBY8 | Nuclear valosin-containing protein-like OS=Mus musculus OX=10090 GN=Nvl PE=1 SV=1               | 0.85        |



|         |        |                                                                                         |             |
|---------|--------|-----------------------------------------------------------------------------------------|-------------|
| Polr1a  | O35134 | DNA-directed RNA polymerase I subunit RPA1 OS=Mus musculus OX=10090 GN=Polr1a PE=1 SV=2 | 0.916666667 |
| Lrrc40  | Q9CRC8 | Leucine-rich repeat-containing protein 40 OS=Mus musculus OX=10090 GN=Lrrc40 PE=1 SV=2  | 0.843333333 |
| Nipbl   | Q6KCD5 | Nipped-B-like protein OS=Mus musculus OX=10090 GN=Nipbl PE=1 SV=1                       | 0.97        |
| Psme4   | Q5SSW2 | Proteasome activator complex subunit 4 OS=Mus musculus OX=10090 GN=Psme4 PE=1 SV=1      | 0.78        |
| Nme1    | P15532 | Nucleoside diphosphate kinase A OS=Mus musculus OX=10090 GN=Nme1 PE=1 SV=1              | 0.903333333 |
| Mapk1   | P63085 | Mitogen-activated protein kinase 1 OS=Mus musculus OX=10090 GN=Mapk1 PE=1 SV=3          | 0.743333333 |
| Ywhaz   | P63101 | 14-3-3 protein zeta/delta OS=Mus musculus OX=10090 GN=Ywhaz PE=1 SV=1                   | 0.873333333 |
| Rps6ka3 | P18654 | Ribosomal protein S6 kinase alpha-3 OS=Mus musculus OX=10090 GN=Rps6ka3 PE=1 SV=2       | 0.95        |
| Hmgb1   | P63158 | High mobility group protein B1 OS=Mus musculus OX=10090 GN=Hmgb1 PE=1 SV=2              | 0.853333333 |
| Idh1    | O88844 | Isocitrate dehydrogenase [NADP] cytoplasmic OS=Mus musculus OX=10090 GN=Idh1 PE=1 SV=2  | 0.88        |
| Rock2   | P70336 | Rho-associated protein kinase 2 OS=Mus musculus OX=10090 GN=Rock2 PE=1 SV=1             | 0.916666667 |
| Fmr1    | P35922 | Synaptic functional regulator FMR1 OS=Mus musculus OX=10090 GN=Fmr1 PE=1 SV=1           | 0.843333333 |
| Wnk1    | P83741 | Serine/threonine-protein kinase WNK1 OS=Mus musculus OX=10090 GN=Wnk1 PE=1 SV=2         | 0.79        |
| Cap1    | P40124 | Adenylyl cyclase-associated protein 1 OS=Mus musculus OX=10090 GN=Cap1 PE=1 SV=4        | 0.863333333 |
| Septin7 | O55131 | Septin-7 OS=Mus musculus OX=10090 GN=Septin7 PE=1 SV=1                                  | 0.91        |
| Atl3    | Q91YH5 | Atlastin-3 OS=Mus musculus OX=10090 GN=Atl3 PE=1 SV=1                                   | 0.92        |
| Ddx18   | Q8K363 | ATP-dependent RNA helicase DDX18 OS=Mus musculus OX=10090 GN=Ddx18 PE=1 SV=1            | 0.863333333 |
| Dhx29   | Q6PGC1 | ATP-dependent RNA helicase DHX29 OS=Mus musculus OX=10090 GN=Dhx29 PE=1 SV=1            | 1.02        |
| Kpna2   | P52293 | Importin subunit alpha-1 OS=Mus musculus OX=10090 GN=Kpna2 PE=1 SV=2                    | 0.846666667 |
| Rps3    | P62908 | 40S ribosomal protein S3 OS=Mus musculus OX=10090 GN=Rps3 PE=1 SV=1                     | 0.893333333 |
| Phb     | P67778 | Prohibitin OS=Mus musculus OX=10090 GN=Phb PE=1 SV=1                                    | 0.946666667 |
| Sars    | P26638 | Serine-tRNA ligase cytoplasmic OS=Mus musculus OX=10090 GN=Sars1 PE=1 SV=3              | 0.85        |
| Ncbp1   | Q3UYV9 | Nuclear cap-binding protein subunit 1 OS=Mus musculus OX=10090 GN=Ncbp1 PE=1 SV=2       | 0.913333333 |
| Nxf1    | Q99JX7 | Nuclear RNA export factor 1 OS=Mus musculus OX=10090 GN=Nxf1 PE=1 SV=3                  | 0.896666667 |
| Psmd13  | Q9WVJ2 | 26S proteasome non-ATPase regulatory subunit 13 OS=Mus musculus OX=10090 GN=Psmd13 PE=1 | 0.92        |
| Psmc4   | P54775 | 26S proteasome regulatory subunit 6B OS=Mus musculus OX=10090 GN=Psmc4 PE=1 SV=2        | 0.873333333 |
| Rps4x   | P62702 | 40S ribosomal protein S4 X isoform OS=Mus musculus OX=10090 GN=Rps4x PE=1 SV=2          | 0.906666667 |
| Farsa   | Q8C0C7 | Phenylalanine-tRNA ligase alpha subunit OS=Mus musculus OX=10090 GN=Farsa PE=1 SV=1     | 0.883333333 |
| Eif2a   | Q8BJW6 | Eukaryotic translation initiation factor 2A OS=Mus musculus OX=10090 GN=Eif2a PE=1 SV=2 | 0.843333333 |
| Zfr     | O88532 | Zinc finger RNA-binding protein OS=Mus musculus OX=10090 GN=Zfr PE=1 SV=2               | 0.82        |
| Rabgap1 | A2AWA9 | Rab GTPase-activating protein 1 OS=Mus musculus OX=10090 GN=Rabgap1 PE=1 SV=1           | 0.916666667 |
| Ppid    | Q9CR16 | Peptidyl-prolyl cis-trans isomerase D OS=Mus musculus OX=10090 GN=Ppid PE=1 SV=3        | 0.873333333 |
| Psmd11  | Q8BG32 | 26S proteasome non-ATPase regulatory subunit 11 OS=Mus musculus OX=10090 GN=Psmd11 PE=1 | 0.883333333 |
| Rbm14   | Q8C2Q3 | RNA-binding protein 14 OS=Mus musculus OX=10090 GN=Rbm14 PE=1 SV=1                      | 0.92        |

|          |        |                                                                                                           |  |
|----------|--------|-----------------------------------------------------------------------------------------------------------|--|
| Rpa1     | Q8VEE4 | Replication protein A 70 kDa DNA-binding subunit OS=Mus musculus OX=10090 GN=Rpa1 PE=1 SV= 0.9            |  |
| Samhd1   | Q60710 | Deoxynucleoside triphosphate triphosphohydrolase SAMHD1 OS=Mus musculus OX=10090 GN=Sar 0.876666667       |  |
| Erc1     | Q99MI1 | ELKS/Rab6-interacting/CAST family member 1 OS=Mus musculus OX=10090 GN=Erc1 PE=1 SV=1 1.063333333         |  |
| Pdlim5   | Q8CI51 | PDZ and LIM domain protein 5 OS=Mus musculus OX=10090 GN=Pdlim5 PE=1 SV=4 0.87                            |  |
| Slc3a2   | P10852 | 4F2 cell-surface antigen heavy chain OS=Mus musculus OX=10090 GN=Slc3a2 PE=1 SV=1 0.886666667             |  |
| Thoc2    | B1AZI6 | THO complex subunit 2 OS=Mus musculus OX=10090 GN=Thoc2 PE=1 SV=1 0.886666667                             |  |
| Cpsf1    | Q9EPU4 | Cleavage and polyadenylation specificity factor subunit 1 OS=Mus musculus OX=10090 GN=Cpsf1 P 0.903333333 |  |
| Gapvd1   | Q6PAR5 | GTPase-activating protein and VPS9 domain-containing protein 1 OS=Mus musculus OX=10090 GN= 0.846666667   |  |
| Mvp      | Q9EQK5 | Major vault protein OS=Mus musculus OX=10090 GN=Mvp PE=1 SV=4 0.863333333                                 |  |
| Iars2    | Q8BIJ6 | Isoleucine--tRNA ligase mitochondrial OS=Mus musculus OX=10090 GN=Iars2 PE=1 SV=1 0.8                     |  |
| Pum3     | Q8BKS9 | Pumilio homolog 3 OS=Mus musculus OX=10090 GN=Pum3 PE=1 SV=2 0.9                                          |  |
| Sf3a3    | Q9D554 | Splicing factor 3A subunit 3 OS=Mus musculus OX=10090 GN=Sf3a3 PE=1 SV=2 0.876666667                      |  |
| Elac2    | Q80Y81 | Zinc phosphodiesterase ELAC protein 2 OS=Mus musculus OX=10090 GN=Elac2 PE=1 SV=1 0.853333333             |  |
| Mical12  | Q3TN34 | MICAL-like protein 2 OS=Mus musculus OX=10090 GN=Mical12 PE=1 SV=1 0.816666667                            |  |
| Znf638   | Q61464 | Zinc finger protein 638 OS=Mus musculus OX=10090 GN=Znf638 PE=1 SV=2 0.836666667                          |  |
| Ncam1    | P13595 | Neural cell adhesion molecule 1 OS=Mus musculus OX=10090 GN=Ncam1 PE=1 SV=3 0.826666667                   |  |
| Gfm1     | Q8K0D5 | Elongation factor G mitochondrial OS=Mus musculus OX=10090 GN=Gfm1 PE=1 SV=1 0.986666667                  |  |
| Plcb3    | P51432 | 1-phosphatidylinositol 4 5-bisphosphate phosphodiesterase beta-3 OS=Mus musculus OX=10090 G 0.82          |  |
| Chd5     | A2A8L1 | Chromodomain-helicase-DNA-binding protein 5 OS=Mus musculus OX=10090 GN=Chd5 PE=1 SV=1 0.95               |  |
| Hnrnp1   | O35737 | Heterogeneous nuclear ribonucleoprotein H OS=Mus musculus OX=10090 GN=Hnrnp1 PE=1 SV=3 0.87               |  |
| Tmpo     | Q61029 | Lamina-associated polypeptide 2 isoforms beta/delta/epsilon/gamma OS=Mus musculus OX=10090 0.88           |  |
| Tln2     | Q71LX4 | Talin-2 OS=Mus musculus OX=10090 GN=Tln2 PE=1 SV=3 0.976666667                                            |  |
| Pcbp2    | Q61990 | Poly(rC)-binding protein 2 OS=Mus musculus OX=10090 GN=Pcbp2 PE=1 SV=1 0.833333333                        |  |
| Pfkm     | P47857 | ATP-dependent 6-phosphofructokinase muscle type OS=Mus musculus OX=10090 GN=Pfkm PE=1 S 0.9               |  |
| Hnrnpf   | Q9Z2X1 | Heterogeneous nuclear ribonucleoprotein F OS=Mus musculus OX=10090 GN=Hnrnpf PE=1 SV=3 0.903333333        |  |
| Stag2    | O35638 | Cohesin subunit SA-2 OS=Mus musculus OX=10090 GN=Stag2 PE=1 SV=3 0.943333333                              |  |
| Epb41l1  | Q9Z2H5 | Band 4.1-like protein 1 OS=Mus musculus OX=10090 GN=Epb41l1 PE=1 SV=2 0.846666667                         |  |
| Slc25a12 | Q8BH59 | Calcium-binding mitochondrial carrier protein Aralar1 OS=Mus musculus OX=10090 GN=Slc25a12 0.91           |  |
| Lap3     | Q9CPY7 | Cytosol aminopeptidase OS=Mus musculus OX=10090 GN=Lap3 PE=1 SV=3 0.893333333                             |  |
| Anxa3    | O35639 | Annexin A3 OS=Mus musculus OX=10090 GN=Anxa3 PE=1 SV=4 0.916666667                                        |  |
| Psmc5    | P62196 | 26S proteasome regulatory subunit 8 OS=Mus musculus OX=10090 GN=Psmc5 PE=1 SV=1 0.883333333               |  |
| Thrap3   | Q569Z6 | Thyroid hormone receptor-associated protein 3 OS=Mus musculus OX=10090 GN=Thrap3 PE=1 SV= 0.856666667     |  |
| Akr1b1   | P45376 | Aldo-keto reductase family 1 member B1 OS=Mus musculus OX=10090 GN=Akr1b1 PE=1 SV=3 0.94                  |  |
| Cyb5r3   | Q9DCN2 | NADH-cytochrome b5 reductase 3 OS=Mus musculus OX=10090 GN=Cyb5r3 PE=1 SV=3 0.873333333                   |  |

|          |        |                                                                                              |             |
|----------|--------|----------------------------------------------------------------------------------------------|-------------|
| Psat1    | Q99K85 | Phosphoserine aminotransferase OS=Mus musculus OX=10090 GN=Psat1 PE=1 SV=1                   | 0.866666667 |
| Dkc1     | Q9ESX5 | H/ACA ribonucleoprotein complex subunit DKC1 OS=Mus musculus OX=10090 GN=Dkc1 PE=1 SV=4      | 0.883333333 |
| Lpp      | Q8BFW7 | Lipoma-preferred partner homolog OS=Mus musculus OX=10090 GN=Lpp PE=1 SV=1                   | 0.823333333 |
| Adsl     | P54822 | Adenylosuccinate lyase OS=Mus musculus OX=10090 GN=Adsl PE=1 SV=2                            | 0.89        |
| Actr3    | Q99JY9 | Actin-related protein 3 OS=Mus musculus OX=10090 GN=Actr3 PE=1 SV=3                          | 0.9         |
| Slc25a3  | Q8VEM8 | Phosphate carrier protein mitochondrial OS=Mus musculus OX=10090 GN=Slc25a3 PE=1 SV=1        | 0.896666667 |
| Prpf19   | Q99KP6 | Pre-mRNA-processing factor 19 OS=Mus musculus OX=10090 GN=Prpf19 PE=1 SV=1                   | 0.843333333 |
| Washc2   | Q6PGL7 | WASH complex subunit 2 OS=Mus musculus OX=10090 GN=Washc2 PE=1 SV=1                          | 0.773333333 |
| Prmt1    | Q9JIF0 | Protein arginine N-methyltransferase 1 OS=Mus musculus OX=10090 GN=Prmt1 PE=1 SV=1           | 0.906666667 |
| Ola1     | Q9CZ30 | Obg-like ATPase 1 OS=Mus musculus OX=10090 GN=Ola1 PE=1 SV=1                                 | 0.903333333 |
| Sec63    | Q8VHE0 | Translocation protein SEC63 homolog OS=Mus musculus OX=10090 GN=Sec63 PE=1 SV=4              | 0.983333333 |
| Rsl1d1   | Q8BVY0 | Ribosomal L1 domain-containing protein 1 OS=Mus musculus OX=10090 GN=Rsl1d1 PE=1 SV=1        | 0.866666667 |
| Nup107   | Q8BH74 | Nuclear pore complex protein Nup107 OS=Mus musculus OX=10090 GN=Nup107 PE=1 SV=1             | 0.923333333 |
| Ube3a    | O08759 | Ubiquitin-protein ligase E3A OS=Mus musculus OX=10090 GN=Ube3a PE=1 SV=2                     | 0.923333333 |
| HnrnpII  | Q921F4 | Heterogeneous nuclear ribonucleoprotein L-like OS=Mus musculus OX=10090 GN=HnrnpII PE=1 SV=  | 0.91        |
| Ran      | P62827 | GTP-binding nuclear protein Ran OS=Mus musculus OX=10090 GN=Ran PE=1 SV=3                    | 0.883333333 |
| Got1     | P05201 | Aspartate aminotransferase cytoplasmic OS=Mus musculus OX=10090 GN=Got1 PE=1 SV=3            | 0.856666667 |
| Lima1    | Q9ERG0 | LIM domain and actin-binding protein 1 OS=Mus musculus OX=10090 GN=Lima1 PE=1 SV=3           | 0.886666667 |
| Ly75     | Q60767 | Lymphocyte antigen 75 OS=Mus musculus OX=10090 GN=Ly75 PE=1 SV=2                             | 0.86        |
| Farsb    | Q9WUA2 | Phenylalanine-tRNA ligase beta subunit OS=Mus musculus OX=10090 GN=Farsb PE=1 SV=2           | 0.913333333 |
| Ccar2    | Q8VDP4 | Cell cycle and apoptosis regulator protein 2 OS=Mus musculus OX=10090 GN=Ccar2 PE=1 SV=2     | 0.846666667 |
| Atp13a1  | Q9EPE9 | Manganese-transporting ATPase 13A1 OS=Mus musculus OX=10090 GN=Atp13a1 PE=1 SV=2             | 0.923333333 |
| Myo1e    | E9Q634 | Unconventional myosin-Ie OS=Mus musculus OX=10090 GN=Myo1e PE=1 SV=1                         | 0.96        |
| Prmt5    | Q8CIG8 | Protein arginine N-methyltransferase 5 OS=Mus musculus OX=10090 GN=Prmt5 PE=1 SV=3           | 0.793333333 |
| Eif4a2   | P10630 | Eukaryotic initiation factor 4A-II OS=Mus musculus OX=10090 GN=Eif4a2 PE=1 SV=2              | 0.866666667 |
| Nme2     | Q01768 | Nucleoside diphosphate kinase B OS=Mus musculus OX=10090 GN=Nme2 PE=1 SV=1                   | 0.886666667 |
| Lmnb2    | P21619 | Lamin-B2 OS=Mus musculus OX=10090 GN=Lmnb2 PE=1 SV=2                                         | 0.956666667 |
| Usp4     | P35123 | Ubiquitin carboxyl-terminal hydrolase 4 OS=Mus musculus OX=10090 GN=Usp4 PE=1 SV=3           | 0.866666667 |
| Serpinb6 | Q60854 | Serpin B6 OS=Mus musculus OX=10090 GN=Serpinb6 PE=1 SV=1                                     | 0.88        |
| Fxr1     | Q61584 | Fragile X mental retardation syndrome-related protein 1 OS=Mus musculus OX=10090 GN=Fxr1 PE= | 0.883333333 |
| Trio     | Q0KL02 | Triple functional domain protein OS=Mus musculus OX=10090 GN=Trio PE=1 SV=3                  | 0.92        |
| Ptgs2    | Q05769 | Prostaglandin G/H synthase 2 OS=Mus musculus OX=10090 GN=Ptgs2 PE=1 SV=1                     | 0.99        |
| Serbp1   | Q9CY58 | Plasminogen activator inhibitor 1 RNA-binding protein OS=Mus musculus OX=10090 GN=Serbp1 PE= | 0.866666667 |
| Kif15    | Q6P9L6 | Kinesin-like protein KIF15 OS=Mus musculus OX=10090 GN=Kif15 PE=1 SV=1                       | 0.896666667 |

|         |        |                                                                                                |             |
|---------|--------|------------------------------------------------------------------------------------------------|-------------|
| Myo9b   | Q9QY06 | Unconventional myosin-IXb OS=Mus musculus OX=10090 GN=Myo9b PE=1 SV=2                          | 0.906666667 |
| Ube3c   | Q80U95 | Ubiquitin-protein ligase E3C OS=Mus musculus OX=10090 GN=Ube3c PE=1 SV=2                       | 0.943333333 |
| Uba2    | Q9Z1F9 | SUMO-activating enzyme subunit 2 OS=Mus musculus OX=10090 GN=Uba2 PE=1 SV=1                    | 0.893333333 |
| Nop58   | Q6DFW4 | Nucleolar protein 58 OS=Mus musculus OX=10090 GN=Nop58 PE=1 SV=1                               | 0.893333333 |
| Zyx     | Q62523 | Zyxin OS=Mus musculus OX=10090 GN=Zyx PE=1 SV=2                                                | 0.783333333 |
| Psmc3   | O88685 | 26S proteasome regulatory subunit 6A OS=Mus musculus OX=10090 GN=Psmc3 PE=1 SV=2               | 0.906666667 |
| Got2    | P05202 | Aspartate aminotransferase mitochondrial OS=Mus musculus OX=10090 GN=Got2 PE=1 SV=1            | 0.9         |
| Pdlim1  | O70400 | PDZ and LIM domain protein 1 OS=Mus musculus OX=10090 GN=Pdlim1 PE=1 SV=4                      | 0.853333333 |
| Psmc2   | P46471 | 26S proteasome regulatory subunit 7 OS=Mus musculus OX=10090 GN=Psmc2 PE=1 SV=5                | 0.896666667 |
| Ppa1    | Q9D819 | Inorganic pyrophosphatase OS=Mus musculus OX=10090 GN=Ppa1 PE=1 SV=1                           | 0.9         |
| Puf60   | Q3UEB3 | Poly(U)-binding-splicing factor PUF60 OS=Mus musculus OX=10090 GN=Puf60 PE=1 SV=2              | 0.883333333 |
| Psmc12  | Q9D8W5 | 26S proteasome non-ATPase regulatory subunit 12 OS=Mus musculus OX=10090 GN=Psmc12 PE=1        | 0.896666667 |
| Gpi     | P06745 | Glucose-6-phosphate isomerase OS=Mus musculus OX=10090 GN=Gpi PE=1 SV=4                        | 0.886666667 |
| Snx9    | Q91VH2 | Sorting nexin-9 OS=Mus musculus OX=10090 GN=Snx9 PE=1 SV=1                                     | 0.913333333 |
| Ssb     | P32067 | Lupus La protein homolog OS=Mus musculus OX=10090 GN=Ssb PE=1 SV=1                             | 0.88        |
| Aacs    | Q9D2R0 | Acetoacetyl-CoA synthetase OS=Mus musculus OX=10090 GN=Aacs PE=1 SV=1                          | 0.86        |
| Ctnnb1  | Q02248 | Catenin beta-1 OS=Mus musculus OX=10090 GN=Ctnnb1 PE=1 SV=1                                    | 0.903333333 |
| Psmc3   | P14685 | 26S proteasome non-ATPase regulatory subunit 3 OS=Mus musculus OX=10090 GN=Psmc3 PE=1 SV=1     | 0.89        |
| Wdr3    | Q8BHB4 | WD repeat-containing protein 3 OS=Mus musculus OX=10090 GN=Wdr3 PE=1 SV=1                      | 0.913333333 |
| Bag6    | Q9Z1R2 | Large proline-rich protein BAG6 OS=Mus musculus OX=10090 GN=Bag6 PE=1 SV=1                     | 0.83        |
| Sympk   | Q80X82 | Symplekin OS=Mus musculus OX=10090 GN=Sympk PE=1 SV=2                                          | 0.873333333 |
| Stat3   | P42227 | Signal transducer and activator of transcription 3 OS=Mus musculus OX=10090 GN=Stat3 PE=1 SV=2 | 0.94        |
| Son     | Q9QX47 | Protein SON OS=Mus musculus OX=10090 GN=Son PE=1 SV=2                                          | 0.833333333 |
| Ndufs1  | Q91VD9 | NADH-ubiquinone oxidoreductase 75 kDa subunit mitochondrial OS=Mus musculus OX=10090 GN=       | 0.893333333 |
| Tbc1d15 | Q9CXF4 | TBC1 domain family member 15 OS=Mus musculus OX=10090 GN=Tbc1d15 PE=1 SV=1                     | 0.89        |
| Rnpep   | Q8VCT3 | Aminopeptidase B OS=Mus musculus OX=10090 GN=Rnpep PE=1 SV=2                                   | 0.92        |
| Bop1    | P97452 | Ribosome biogenesis protein BOP1 OS=Mus musculus OX=10090 GN=Bop1 PE=1 SV=1                    | 0.866666667 |
| Xpot    | Q9CRT8 | Exportin-T OS=Mus musculus OX=10090 GN=Xpot PE=1 SV=3                                          | 0.896666667 |
| Washc5  | Q8C2E7 | WASH complex subunit 5 OS=Mus musculus OX=10090 GN=Washc5 PE=1 SV=2                            | 0.846666667 |
| Xpo7    | Q9EPK7 | Exportin-7 OS=Mus musculus OX=10090 GN=Xpo7 PE=1 SV=3                                          | 0.846666667 |
| Mon2    | Q80TL7 | Protein MON2 homolog OS=Mus musculus OX=10090 GN=Mon2 PE=1 SV=2                                | 0.963333333 |
| Gak     | Q99KY4 | Cyclin-G-associated kinase OS=Mus musculus OX=10090 GN=Gak PE=1 SV=2                           | 0.956666667 |
| Usp24   | B1AY13 | Ubiquitin carboxyl-terminal hydrolase 24 OS=Mus musculus OX=10090 GN=Usp24 PE=1 SV=1           | 0.996666667 |
| Esyt1   | Q3U7R1 | Extended synaptotagmin-1 OS=Mus musculus OX=10090 GN=Esyt1 PE=1 SV=2                           | 0.853333333 |

|          |        |                                                                                                       |             |
|----------|--------|-------------------------------------------------------------------------------------------------------|-------------|
| Srrt     | Q99MR6 | Serrate RNA effector molecule homolog OS=Mus musculus OX=10090 GN=Srrt PE=1 SV=1                      | 0.84        |
| Septin11 | Q8C1B7 | Septin-11 OS=Mus musculus OX=10090 GN=Septin11 PE=1 SV=4                                              | 0.893333333 |
| Atp2b1   | G5E829 | Plasma membrane calcium-transporting ATPase 1 OS=Mus musculus OX=10090 GN=Atp2b1 PE=1 SV=1            | 0.83        |
| Mta2     | Q9R190 | Metastasis-associated protein MTA2 OS=Mus musculus OX=10090 GN=Mta2 PE=1 SV=1                         | 0.936666667 |
| Pygb     | Q8CI94 | Glycogen phosphorylase brain form OS=Mus musculus OX=10090 GN=Pygb PE=1 SV=3                          | 0.863333333 |
| Khsrp    | Q3U0V1 | Far upstream element-binding protein 2 OS=Mus musculus OX=10090 GN=Khsrp PE=1 SV=2                    | 0.86        |
| Nasp     | Q99MD9 | Nuclear autoantigenic sperm protein OS=Mus musculus OX=10090 GN=Nasp PE=1 SV=2                        | 0.863333333 |
| Fubp1    | Q91WJ8 | Far upstream element-binding protein 1 OS=Mus musculus OX=10090 GN=Fubp1 PE=1 SV=1                    | 0.866666667 |
| Ankrd17  | Q99NH0 | Ankyrin repeat domain-containing protein 17 OS=Mus musculus OX=10090 GN=Ankrd17 PE=1 SV=2             | 0.993333333 |
| Ppia     | P17742 | Peptidyl-prolyl cis-trans isomerase A OS=Mus musculus OX=10090 GN=Ppia PE=1 SV=2                      | 0.916666667 |
| Itgb1    | P09055 | Integrin beta-1 OS=Mus musculus OX=10090 GN=Itgb1 PE=1 SV=1                                           | 0.863333333 |
| Aldh2    | P47738 | Aldehyde dehydrogenase mitochondrial OS=Mus musculus OX=10090 GN=Aldh2 PE=1 SV=1                      | 0.89        |
| Col6a1   | Q04857 | Collagen alpha-1(VI) chain OS=Mus musculus OX=10090 GN=Col6a1 PE=1 SV=1                               | 0.89        |
| Hsd17b4  | P51660 | Peroxisomal multifunctional enzyme type 2 OS=Mus musculus OX=10090 GN=Hsd17b4 PE=1 SV=3               | 0.873333333 |
| Ltbp1    | Q8CG19 | Latent-transforming growth factor beta-binding protein 1 OS=Mus musculus OX=10090 GN=Ltbp1 PE=1 SV=1  | 0.81        |
| Ipo9     | Q91YE6 | Importin-9 OS=Mus musculus OX=10090 GN=Ipo9 PE=1 SV=3                                                 | 0.916666667 |
| Tufm     | Q8BFR5 | Elongation factor Tu mitochondrial OS=Mus musculus OX=10090 GN=Tufm PE=1 SV=1                         | 0.876666667 |
| Atxn10   | P28658 | Ataxin-10 OS=Mus musculus OX=10090 GN=Atxn10 PE=1 SV=2                                                | 0.88        |
| Srp68    | Q8BMA6 | Signal recognition particle subunit SRP68 OS=Mus musculus OX=10090 GN=Srp68 PE=1 SV=2                 | 0.896666667 |
| Cdc5l    | Q6A068 | Cell division cycle 5-like protein OS=Mus musculus OX=10090 GN=Cdc5l PE=1 SV=2                        | 0.853333333 |
| Ptpn11   | P35235 | Tyrosine-protein phosphatase non-receptor type 11 OS=Mus musculus OX=10090 GN=Ptpn11 PE=1 SV=1        | 0.93        |
| Supt5h   | O55201 | Transcription elongation factor SPT5 OS=Mus musculus OX=10090 GN=Supt5h PE=1 SV=1                     | 0.793333333 |
| Nudcd1   | Q6PIP5 | NudC domain-containing protein 1 OS=Mus musculus OX=10090 GN=Nudcd1 PE=1 SV=2                         | 0.943333333 |
| Lamc1    | P02468 | Laminin subunit gamma-1 OS=Mus musculus OX=10090 GN=Lamc1 PE=1 SV=2                                   | 0.976666667 |
| Ctdp1    | Q7TSG2 | RNA polymerase II subunit A C-terminal domain phosphatase OS=Mus musculus OX=10090 GN=Ctdp1 PE=1 SV=1 | 0.9         |
| Gtpbp4   | Q99ME9 | Nucleolar GTP-binding protein 1 OS=Mus musculus OX=10090 GN=Gtpbp4 PE=1 SV=3                          | 0.863333333 |
| Naa25    | Q8BWZ3 | N-alpha-acetyltransferase 25 NatB auxiliary subunit OS=Mus musculus OX=10090 GN=Naa25 PE=1 SV=1       | 0.9         |
| Ankfy1   | Q810B6 | Rabankyrin-5 OS=Mus musculus OX=10090 GN=Ankfy1 PE=1 SV=2                                             | 0.88        |
| Hells    | Q60848 | Lymphocyte-specific helicase OS=Mus musculus OX=10090 GN=Hells PE=1 SV=2                              | 1.006666667 |
| Nop2     | Q922K7 | Probable 28S rRNA (cytosine-C(5))-methyltransferase OS=Mus musculus OX=10090 GN=Nop2 PE=1 SV=1        | 0.926666667 |
| Ptk7     | Q8BKG3 | Inactive tyrosine-protein kinase 7 OS=Mus musculus OX=10090 GN=Ptk7 PE=1 SV=1                         | 0.886666667 |
| Dnm1     | P39053 | Dynamin-1 OS=Mus musculus OX=10090 GN=Dnm1 PE=1 SV=2                                                  | 0.85        |
| Ago2     | Q8CJG0 | Protein argonaute-2 OS=Mus musculus OX=10090 GN=Ago2 PE=1 SV=3                                        | 0.87        |
| Hnrnpa3  | Q8BG05 | Heterogeneous nuclear ribonucleoprotein A3 OS=Mus musculus OX=10090 GN=Hnrnpa3 PE=1 SV=1              | 0.886666667 |



|         |        |                                                                                                     |             |
|---------|--------|-----------------------------------------------------------------------------------------------------|-------------|
| Txnrd1  | Q9JMH6 | Thioredoxin reductase 1 cytoplasmic OS=Mus musculus OX=10090 GN=Txnrd1 PE=1 SV=3                    | 0.886666667 |
| Hspa4l  | P48722 | Heat shock 70 kDa protein 4L OS=Mus musculus OX=10090 GN=Hspa4l PE=1 SV=2                           | 0.89        |
| Thbs1   | P35441 | Thrombospondin-1 OS=Mus musculus OX=10090 GN=Thbs1 PE=1 SV=1                                        | 0.753333333 |
| Nono    | Q99K48 | Non-POU domain-containing octamer-binding protein OS=Mus musculus OX=10090 GN=Nono PE=1 SV=1        | 0.85        |
| Calu    | O35887 | Calumenin OS=Mus musculus OX=10090 GN=Calu PE=1 SV=1                                                | 0.846666667 |
| Esd     | Q9R0P3 | S-formylglutathione hydrolase OS=Mus musculus OX=10090 GN=Esd PE=1 SV=1                             | 0.903333333 |
| Rpl3    | P27659 | 60S ribosomal protein L3 OS=Mus musculus OX=10090 GN=Rpl3 PE=1 SV=3                                 | 0.91        |
| Eif2s2  | Q99L45 | Eukaryotic translation initiation factor 2 subunit 2 OS=Mus musculus OX=10090 GN=Eif2s2 PE=1 SV=1   | 0.87        |
| Dpp3    | Q99KK7 | Dipeptidyl peptidase 3 OS=Mus musculus OX=10090 GN=Dpp3 PE=1 SV=2                                   | 0.893333333 |
| Hadha   | Q8BMS1 | Trifunctional enzyme subunit alpha mitochondrial OS=Mus musculus OX=10090 GN=Hadha PE=1 SV=1        | 0.92        |
| Arhgef2 | Q60875 | Rho guanine nucleotide exchange factor 2 OS=Mus musculus OX=10090 GN=Arhgef2 PE=1 SV=4              | 0.85        |
| Kif11   | Q6P9P6 | Kinesin-like protein KIF11 OS=Mus musculus OX=10090 GN=Kif11 PE=1 SV=1                              | 0.916666667 |
| Ddx6    | P54823 | Probable ATP-dependent RNA helicase DDX6 OS=Mus musculus OX=10090 GN=Ddx6 PE=1 SV=1                 | 0.86        |
| Tcof1   | O08784 | Treacle protein OS=Mus musculus OX=10090 GN=Tcof1 PE=1 SV=1                                         | 0.733333333 |
| Ptpn23  | Q6PB44 | Tyrosine-protein phosphatase non-receptor type 23 OS=Mus musculus OX=10090 GN=Ptpn23 PE=1 SV=1      | 0.813333333 |
| Heatr5a | Q5PRF0 | HEAT repeat-containing protein 5A OS=Mus musculus OX=10090 GN=Heatr5a PE=1 SV=2                     | 0.843333333 |
| Lonp1   | Q8CGK3 | Lon protease homolog mitochondrial OS=Mus musculus OX=10090 GN=Lonp1 PE=1 SV=2                      | 0.89        |
| Nup160  | Q9Z0W3 | Nuclear pore complex protein Nup160 OS=Mus musculus OX=10090 GN=Nup160 PE=1 SV=2                    | 0.846666667 |
| Lnpep   | Q8C129 | Leucyl-cystinyl aminopeptidase OS=Mus musculus OX=10090 GN=Lnpep PE=1 SV=1                          | 0.876666667 |
| Rif1    | Q6PR54 | Telomere-associated protein RIF1 OS=Mus musculus OX=10090 GN=Rif1 PE=1 SV=2                         | 0.846666667 |
| H4f16   | P62806 | Histone H4 OS=Mus musculus OX=10090 GN=H4c1 PE=1 SV=2                                               | 0.93        |
| Cep170  | Q6A065 | Centrosomal protein of 170 kDa OS=Mus musculus OX=10090 GN=Cep170 PE=1 SV=2                         | 0.846666667 |
| Sart3   | Q9JLI8 | Squamous cell carcinoma antigen recognized by T-cells 3 OS=Mus musculus OX=10090 GN=Sart3 PE=1 SV=1 | 0.866666667 |
| Msh2    | P43247 | DNA mismatch repair protein Msh2 OS=Mus musculus OX=10090 GN=Msh2 PE=1 SV=1                         | 0.866666667 |
| Rad50   | P70388 | DNA repair protein RAD50 OS=Mus musculus OX=10090 GN=Rad50 PE=1 SV=1                                | 0.886666667 |
| Adnp    | Q9Z103 | Activity-dependent neuroprotector homeobox protein OS=Mus musculus OX=10090 GN=Adnp PE=1 SV=1       | 0.943333333 |
| Thada   | A8C756 | Thyroid adenoma-associated protein homolog OS=Mus musculus OX=10090 GN=Thada PE=1 SV=1              | 0.87        |
| Pkn2    | Q8BWW9 | Serine/threonine-protein kinase N2 OS=Mus musculus OX=10090 GN=Pkn2 PE=1 SV=3                       | 0.926666667 |
| Hspa2   | P17156 | Heat shock-related 70 kDa protein 2 OS=Mus musculus OX=10090 GN=Hspa2 PE=1 SV=2                     | 0.61        |
| Ddx39b  | Q9Z1N5 | Spliceosome RNA helicase Ddx39b OS=Mus musculus OX=10090 GN=Ddx39b PE=1 SV=1                        | 0.853333333 |
| Smarcc2 | Q6PDG5 | SWI/SNF complex subunit SMARCC2 OS=Mus musculus OX=10090 GN=Smarcc2 PE=1 SV=2                       | 0.823333333 |
| Pgam1   | Q9DBJ1 | Phosphoglycerate mutase 1 OS=Mus musculus OX=10090 GN=Pgam1 PE=1 SV=3                               | 0.846666667 |
| Eif4a3  | Q91VC3 | Eukaryotic initiation factor 4A-III OS=Mus musculus OX=10090 GN=Eif4a3 PE=1 SV=3                    | 0.906666667 |
| Dpysl2  | O08553 | Dihydropyrimidinase-related protein 2 OS=Mus musculus OX=10090 GN=Dpysl2 PE=1 SV=2                  | 0.87        |

|         |        |                                                                                                                    |             |
|---------|--------|--------------------------------------------------------------------------------------------------------------------|-------------|
| Dpysl3  | Q62188 | Dihydropyrimidinase-related protein 3 OS=Mus musculus OX=10090 GN=Dpysl3 PE=1 SV=1                                 | 0.85        |
| Pcbp1   | P60335 | Poly(rC)-binding protein 1 OS=Mus musculus OX=10090 GN=Pcbp1 PE=1 SV=1                                             | 0.826666667 |
| G3bp1   | P97855 | Ras GTPase-activating protein-binding protein 1 OS=Mus musculus OX=10090 GN=G3bp1 PE=1 SV=1                        | 0.876666667 |
| Sec23b  | Q9D662 | Protein transport protein Sec23B OS=Mus musculus OX=10090 GN=Sec23b PE=1 SV=1                                      | 0.89        |
| Ctps1   | P70698 | CTP synthase 1 OS=Mus musculus OX=10090 GN=Ctps1 PE=1 SV=2                                                         | 0.886666667 |
| Shmt2   | Q9CZN7 | Serine hydroxymethyltransferase mitochondrial OS=Mus musculus OX=10090 GN=Shmt2 PE=1 SV=1                          | 0.903333333 |
| Thop1   | Q8C1A5 | Thimet oligopeptidase OS=Mus musculus OX=10090 GN=Thop1 PE=1 SV=1                                                  | 0.886666667 |
| Nsf     | P46460 | Vesicle-fusing ATPase OS=Mus musculus OX=10090 GN=Nsf PE=1 SV=2                                                    | 0.893333333 |
| Npm1    | Q61937 | Nucleophosmin OS=Mus musculus OX=10090 GN=Npm1 PE=1 SV=1                                                           | 0.903333333 |
| Lta4h   | P24527 | Leukotriene A-4 hydrolase OS=Mus musculus OX=10090 GN=Lta4h PE=1 SV=4                                              | 0.853333333 |
| Rnh1    | Q91VI7 | Ribonuclease inhibitor OS=Mus musculus OX=10090 GN=Rnh1 PE=1 SV=1                                                  | 0.886666667 |
| Ugdh    | O70475 | UDP-glucose 6-dehydrogenase OS=Mus musculus OX=10090 GN=Ugdh PE=1 SV=1                                             | 0.873333333 |
| Syncrip | Q7TMK9 | Heterogeneous nuclear ribonucleoprotein Q OS=Mus musculus OX=10090 GN=Syncrip PE=1 SV=2                            | 0.88        |
| Tfrc    | Q62351 | Transferrin receptor protein 1 OS=Mus musculus OX=10090 GN=Tfrc PE=1 SV=1                                          | 0.91        |
| Sdha    | Q8K2B3 | Succinate dehydrogenase [ubiquinone] flavoprotein subunit mitochondrial OS=Mus musculus OX=10090 GN=Sdha PE=1 SV=1 | 0.936666667 |
| Niban2  | Q8R1F1 | Protein Niban 2 OS=Mus musculus OX=10090 GN=Niban2 PE=1 SV=2                                                       | 0.88        |
| Tbl3    | Q8C4J7 | Transducin beta-like protein 3 OS=Mus musculus OX=10090 GN=Tbl3 PE=2 SV=1                                          | 0.9         |
| Tnpo3   | Q6P2B1 | Transportin-3 OS=Mus musculus OX=10090 GN=Tnpo3 PE=1 SV=1                                                          | 0.893333333 |
| Pla2g4a | P47713 | Cytosolic phospholipase A2 OS=Mus musculus OX=10090 GN=Pla2g4a PE=1 SV=1                                           | 0.883333333 |
| Atxn2l  | Q7TQH0 | Ataxin-2-like protein OS=Mus musculus OX=10090 GN=Atxn2l PE=1 SV=1                                                 | 0.836666667 |
| Pck2    | Q8BH04 | Phosphoenolpyruvate carboxykinase [GTP] mitochondrial OS=Mus musculus OX=10090 GN=Pck2 PE=1 SV=1                   | 0.89        |
| Larp1   | Q6ZQ58 | La-related protein 1 OS=Mus musculus OX=10090 GN=Larp1 PE=1 SV=3                                                   | 0.85        |
| Capn1   | O35350 | Calpain-1 catalytic subunit OS=Mus musculus OX=10090 GN=Capn1 PE=1 SV=1                                            | 0.853333333 |
| Fermt2  | Q8CIB5 | Fermitin family homolog 2 OS=Mus musculus OX=10090 GN=Fermt2 PE=1 SV=1                                             | 0.856666667 |
| Ddx19a  | Q61655 | ATP-dependent RNA helicase DDX19A OS=Mus musculus OX=10090 GN=Ddx19a PE=1 SV=2                                     | 0.876666667 |
| Slc25a4 | P48962 | ADP/ATP translocase 1 OS=Mus musculus OX=10090 GN=Slc25a4 PE=1 SV=4                                                | 0.916666667 |
| Ezr     | P26040 | Ezrin OS=Mus musculus OX=10090 GN=Ezr PE=1 SV=3                                                                    | 0.903333333 |
| Dnm2    | P39054 | Dynamin-2 OS=Mus musculus OX=10090 GN=Dnm2 PE=1 SV=2                                                               | 0.843333333 |
| Rbbp7   | Q60973 | Histone-binding protein RBBP7 OS=Mus musculus OX=10090 GN=Rbbp7 PE=1 SV=1                                          | 0.87        |
| Plxna1  | P70206 | Plexin-A1 OS=Mus musculus OX=10090 GN=Plxna1 PE=1 SV=1                                                             | 0.89        |
| Cfl1    | P18760 | Cofilin-1 OS=Mus musculus OX=10090 GN=Cfl1 PE=1 SV=3                                                               | 0.87        |
| Ehd2    | Q8BH64 | EH domain-containing protein 2 OS=Mus musculus OX=10090 GN=Ehd2 PE=1 SV=1                                          | 0.823333333 |
| Cul7    | Q8VE73 | Cullin-7 OS=Mus musculus OX=10090 GN=Cul7 PE=1 SV=2                                                                | 0.766666667 |
| Inf2    | Q0GNC1 | Inverted formin-2 OS=Mus musculus OX=10090 GN=Inf2 PE=1 SV=1                                                       | 0.876666667 |

|          |        |                                                                                                          |             |
|----------|--------|----------------------------------------------------------------------------------------------------------|-------------|
| Ruvbl2   | Q9WTM5 | RuvB-like 2 OS=Mus musculus OX=10090 GN=Ruvbl2 PE=1 SV=3                                                 | 0.886666667 |
| Kif4     | P33174 | Chromosome-associated kinesin KIF4 OS=Mus musculus OX=10090 GN=Kif4 PE=1 SV=3                            | 0.883333333 |
| Elp1     | Q7TT37 | Elongator complex protein 1 OS=Mus musculus OX=10090 GN=Elp1 PE=1 SV=2                                   | 0.84        |
| Ppp6r3   | Q922D4 | Serine/threonine-protein phosphatase 6 regulatory subunit 3 OS=Mus musculus OX=10090 GN=Ppp6r3 PE=1 SV=2 | 0.933333333 |
| Hnrnpk   | P61979 | Heterogeneous nuclear ribonucleoprotein K OS=Mus musculus OX=10090 GN=Hnrnpk PE=1 SV=1                   | 0.873333333 |
| Asns     | Q61024 | Asparagine synthetase [glutamine-hydrolyzing] OS=Mus musculus OX=10090 GN=Asns PE=1 SV=3                 | 0.863333333 |
| Eif3l    | Q8QZY1 | Eukaryotic translation initiation factor 3 subunit L OS=Mus musculus OX=10090 GN=Eif3l PE=1 SV=1         | 0.923333333 |
| Rpl4     | Q9D8E6 | 60S ribosomal protein L4 OS=Mus musculus OX=10090 GN=Rpl4 PE=1 SV=3                                      | 0.88        |
| Gls      | D3Z7P3 | Glutaminase kidney isoform mitochondrial OS=Mus musculus OX=10090 GN=Gls PE=1 SV=1                       | 0.886666667 |
| Nup133   | Q8R0G9 | Nuclear pore complex protein Nup133 OS=Mus musculus OX=10090 GN=Nup133 PE=1 SV=2                         | 0.91        |
| Por      | P37040 | NADPH-cytochrome P450 reductase OS=Mus musculus OX=10090 GN=Por PE=1 SV=2                                | 0.88        |
| Cul3     | Q9JLV5 | Cullin-3 OS=Mus musculus OX=10090 GN=Cul3 PE=1 SV=1                                                      | 0.896666667 |
| Abce1    | P61222 | ATP-binding cassette sub-family E member 1 OS=Mus musculus OX=10090 GN=Abce1 PE=1 SV=1                   | 0.903333333 |
| Ddx46    | Q569Z5 | Probable ATP-dependent RNA helicase DDX46 OS=Mus musculus OX=10090 GN=Ddx46 PE=1 SV=2                    | 0.9         |
| Nat10    | Q8K224 | RNA cytidine acetyltransferase OS=Mus musculus OX=10090 GN=Nat10 PE=1 SV=1                               | 0.883333333 |
| Arcn1    | Q5XJY5 | Coatamer subunit delta OS=Mus musculus OX=10090 GN=Arcn1 PE=1 SV=2                                       | 0.88        |
| Lig1     | P37913 | DNA ligase 1 OS=Mus musculus OX=10090 GN=Lig1 PE=1 SV=2                                                  | 0.853333333 |
| Top1     | Q04750 | DNA topoisomerase 1 OS=Mus musculus OX=10090 GN=Top1 PE=1 SV=2                                           | 0.95        |
| Ide      | Q9JHR7 | Insulin-degrading enzyme OS=Mus musculus OX=10090 GN=Ide PE=1 SV=1                                       | 0.876666667 |
| Ubr5     | Q80TP3 | E3 ubiquitin-protein ligase UBR5 OS=Mus musculus OX=10090 GN=Ubr5 PE=1 SV=2                              | 0.86        |
| Ephx1    | Q9D379 | Epoxide hydrolase 1 OS=Mus musculus OX=10090 GN=Ephx1 PE=1 SV=2                                          | 0.85        |
| Yars     | Q91WQ3 | Tyrosine-tRNA ligase cytoplasmic OS=Mus musculus OX=10090 GN=Yars1 PE=1 SV=3                             | 0.833333333 |
| Ap3b1    | Q9Z1T1 | AP-3 complex subunit beta-1 OS=Mus musculus OX=10090 GN=Ap3b1 PE=1 SV=2                                  | 0.89        |
| Cdc42bpb | Q7TT50 | Serine/threonine-protein kinase MRCK beta OS=Mus musculus OX=10090 GN=Cdc42bpb PE=1 SV=2                 | 1.02        |
| Gtf2i    | Q9ESZ8 | General transcription factor II-I OS=Mus musculus OX=10090 GN=Gtf2i PE=1 SV=3                            | 0.9         |
| Actbl2   | Q8BFZ3 | Beta-actin-like protein 2 OS=Mus musculus OX=10090 GN=Actbl2 PE=1 SV=1                                   | 2.4         |
| Ddx39a   | Q8VDW0 | ATP-dependent RNA helicase DDX39A OS=Mus musculus OX=10090 GN=Ddx39a PE=1 SV=1                           | 0.856666667 |
| Slc25a5  | P51881 | ADP/ATP translocase 2 OS=Mus musculus OX=10090 GN=Slc25a5 PE=1 SV=3                                      | 0.84        |
| Pfkl     | P12382 | ATP-dependent 6-phosphofructokinase liver type OS=Mus musculus OX=10090 GN=Pfkl PE=1 SV=4                | 0.89        |
| Ilf3     | Q9Z1X4 | Interleukin enhancer-binding factor 3 OS=Mus musculus OX=10090 GN=Ilf3 PE=1 SV=2                         | 0.84        |
| Sec23a   | Q01405 | Protein transport protein Sec23A OS=Mus musculus OX=10090 GN=Sec23a PE=1 SV=2                            | 0.876666667 |
| Idh2     | P54071 | Isocitrate dehydrogenase [NADP] mitochondrial OS=Mus musculus OX=10090 GN=Idh2 PE=1 SV=3                 | 0.873333333 |
| Ptbp1    | P17225 | Polypyrimidine tract-binding protein 1 OS=Mus musculus OX=10090 GN=Ptbp1 PE=1 SV=2                       | 0.88        |
| Paics    | Q9DCL9 | Multifunctional protein ADE2 OS=Mus musculus OX=10090 GN=Paics PE=1 SV=4                                 | 0.873333333 |

|          |        |                                                                                                                     |             |
|----------|--------|---------------------------------------------------------------------------------------------------------------------|-------------|
| Rack1    | P68040 | Receptor of activated protein C kinase 1 OS=Mus musculus OX=10090 GN=Rack1 PE=1 SV=3                                | 0.876666667 |
| Syne2    | Q6ZWQ0 | Nesprin-2 OS=Mus musculus OX=10090 GN=Syne2 PE=1 SV=2                                                               | 0.956666667 |
| Serpinh1 | P19324 | Serpin H1 OS=Mus musculus OX=10090 GN=Serpinh1 PE=1 SV=3                                                            | 0.906666667 |
| Cct6a    | P80317 | T-complex protein 1 subunit zeta OS=Mus musculus OX=10090 GN=Cct6a PE=1 SV=3                                        | 0.913333333 |
| Eif3c    | Q8R1B4 | Eukaryotic translation initiation factor 3 subunit C OS=Mus musculus OX=10090 GN=Eif3c PE=1 SV=                     | 0.92        |
| Rpn2     | Q9DBG6 | Dolichyl-diphosphooligosaccharide--protein glycosyltransferase subunit 2 OS=Mus musculus OX=10090 GN=Rpn2 PE=1 SV=1 | 0.873333333 |
| P4ha1    | Q60715 | Prolyl 4-hydroxylase subunit alpha-1 OS=Mus musculus OX=10090 GN=P4ha1 PE=1 SV=2                                    | 0.866666667 |
| Fscn1    | Q61553 | Fascin OS=Mus musculus OX=10090 GN=Fscn1 PE=1 SV=4                                                                  | 0.93        |
| Capn2    | O08529 | Calpain-2 catalytic subunit OS=Mus musculus OX=10090 GN=Capn2 PE=1 SV=4                                             | 0.9         |
| Nop56    | Q9D6Z1 | Nucleolar protein 56 OS=Mus musculus OX=10090 GN=Nop56 PE=1 SV=2                                                    | 0.923333333 |
| Plaa     | P27612 | Phospholipase A-2-activating protein OS=Mus musculus OX=10090 GN=Plaa PE=1 SV=4                                     | 0.906666667 |
| Cd109    | Q8R422 | CD109 antigen OS=Mus musculus OX=10090 GN=Cd109 PE=1 SV=1                                                           | 0.856666667 |
| Prpf6    | Q91YR7 | Pre-mRNA-processing factor 6 OS=Mus musculus OX=10090 GN=Prpf6 PE=1 SV=1                                            | 0.813333333 |
| Mtrex    | Q9CZU3 | Exosome RNA helicase MTR4 OS=Mus musculus OX=10090 GN=Mtrex PE=1 SV=1                                               | 0.846666667 |
| Polr2b   | Q8CFI7 | DNA-directed RNA polymerase II subunit RPB2 OS=Mus musculus OX=10090 GN=Polr2b PE=1 SV=2                            | 0.886666667 |
| Acin1    | Q9JIX8 | Apoptotic chromatin condensation inducer in the nucleus OS=Mus musculus OX=10090 GN=Acin1                           | 0.853333333 |
| Usp7     | Q6A4J8 | Ubiquitin carboxyl-terminal hydrolase 7 OS=Mus musculus OX=10090 GN=Usp7 PE=1 SV=1                                  | 0.863333333 |
| Golga3   | P55937 | Golgin subfamily A member 3 OS=Mus musculus OX=10090 GN=Golga3 PE=1 SV=3                                            | 1.02        |
| Mia3     | Q8BI84 | Transport and Golgi organization protein 1 homolog OS=Mus musculus OX=10090 GN=Mia3 PE=1 SV=1                       | 0.823333333 |
| Cobll1   | Q3UMF0 | Cordon-bleu protein-like 1 OS=Mus musculus OX=10090 GN=Cobll1 PE=1 SV=2                                             | 0.796666667 |
| Ap1b1    | O35643 | AP-1 complex subunit beta-1 OS=Mus musculus OX=10090 GN=Ap1b1 PE=1 SV=2                                             | 0.883333333 |
| Epb41l3  | Q9WV92 | Band 4.1-like protein 3 OS=Mus musculus OX=10090 GN=Epb41l3 PE=1 SV=1                                               | 0.86        |
| Spag9    | Q58A65 | C-Jun-amino-terminal kinase-interacting protein 4 OS=Mus musculus OX=10090 GN=Spag9 PE=1 SV=1                       | 0.886666667 |
| Pcm1     | Q9R0L6 | Pericentriolar material 1 protein OS=Mus musculus OX=10090 GN=Pcm1 PE=1 SV=2                                        | 0.946666667 |
| Slk      | O54988 | STE20-like serine/threonine-protein kinase OS=Mus musculus OX=10090 GN=Slk PE=1 SV=2                                | 0.903333333 |
| Dhx15    | O35286 | Pre-mRNA-splicing factor ATP-dependent RNA helicase DHX15 OS=Mus musculus OX=10090 GN=Dhx15                         | 0.913333333 |
| Tbcd     | Q8BYA0 | Tubulin-specific chaperone D OS=Mus musculus OX=10090 GN=Tbcd PE=1 SV=1                                             | 0.98        |
| Atp5f1b  | P56480 | ATP synthase subunit beta mitochondrial OS=Mus musculus OX=10090 GN=Atp5f1b PE=1 SV=2                               | 0.9         |
| Eps8     | Q08509 | Epidermal growth factor receptor kinase substrate 8 OS=Mus musculus OX=10090 GN=Eps8 PE=1 SV=1                      | 0.803333333 |
| Ttll12   | Q3UDE2 | Tubulin--tyrosine ligase-like protein 12 OS=Mus musculus OX=10090 GN=Ttll12 PE=1 SV=1                               | 0.873333333 |
| Glud1    | P26443 | Glutamate dehydrogenase 1 mitochondrial OS=Mus musculus OX=10090 GN=Glud1 PE=1 SV=1                                 | 0.9         |
| Nup155   | Q99P88 | Nuclear pore complex protein Nup155 OS=Mus musculus OX=10090 GN=Nup155 PE=1 SV=1                                    | 0.866666667 |
| Cul2     | Q9D4H8 | Cullin-2 OS=Mus musculus OX=10090 GN=Cul2 PE=1 SV=2                                                                 | 0.873333333 |
| Pdxdc1   | Q99K01 | Pyridoxal-dependent decarboxylase domain-containing protein 1 OS=Mus musculus OX=10090 GN=Pdxdc1                    | 0.93        |

|          |        |                                                                                                                                 |             |
|----------|--------|---------------------------------------------------------------------------------------------------------------------------------|-------------|
| Usp14    | Q9JMA1 | Ubiquitin carboxyl-terminal hydrolase 14 OS=Mus musculus OX=10090 GN=Usp14 PE=1 SV=3                                            | 0.843333333 |
| Ddx42    | Q810A7 | ATP-dependent RNA helicase DDX42 OS=Mus musculus OX=10090 GN=Ddx42 PE=1 SV=3                                                    | 0.9         |
| Ube4b    | Q9ES00 | Ubiquitin conjugation factor E4 B OS=Mus musculus OX=10090 GN=Ube4b PE=1 SV=3                                                   | 0.846666667 |
| Sf3a1    | Q8K4Z5 | Splicing factor 3A subunit 1 OS=Mus musculus OX=10090 GN=Sf3a1 PE=1 SV=1                                                        | 0.87        |
| Cspg4    | Q8VHY0 | Chondroitin sulfate proteoglycan 4 OS=Mus musculus OX=10090 GN=Cspg4 PE=1 SV=3                                                  | 0.9         |
| Ahctf1   | Q8CJF7 | Protein ELYS OS=Mus musculus OX=10090 GN=Ahctf1 PE=1 SV=1                                                                       | 0.966666667 |
| Supt6h   | Q62383 | Transcription elongation factor SPT6 OS=Mus musculus OX=10090 GN=Supt6h PE=1 SV=2                                               | 0.953333333 |
| Smarca4  | Q3TKT4 | Transcription activator BRG1 OS=Mus musculus OX=10090 GN=Smarca4 PE=1 SV=1                                                      | 0.95        |
| Rdx      | P26043 | Radixin OS=Mus musculus OX=10090 GN=Rdx PE=1 SV=3                                                                               | 0.873333333 |
| Ehd1     | Q9WVK4 | EH domain-containing protein 1 OS=Mus musculus OX=10090 GN=Ehd1 PE=1 SV=1                                                       | 0.863333333 |
| Smarcc1  | P97496 | SWI/SNF complex subunit SMARCC1 OS=Mus musculus OX=10090 GN=Smarcc1 PE=1 SV=2                                                   | 0.816666667 |
| Hk1      | P17710 | Hexokinase-1 OS=Mus musculus OX=10090 GN=Hk1 PE=1 SV=3                                                                          | 0.886666667 |
| Trap1    | Q9CQN1 | Heat shock protein 75 kDa mitochondrial OS=Mus musculus OX=10090 GN=Trap1 PE=1 SV=1                                             | 0.9         |
| Ppp1r12a | Q9DBR7 | Protein phosphatase 1 regulatory subunit 12A OS=Mus musculus OX=10090 GN=Ppp1r12a PE=1 SV=1                                     | 0.87        |
| Lrrfip1  | Q3UZ39 | Leucine-rich repeat flightless-interacting protein 1 OS=Mus musculus OX=10090 GN=Lrrfip1 PE=1 SV=1                              | 0.773333333 |
| Septin9  | Q80UG5 | Septin-9 OS=Mus musculus OX=10090 GN=Septin9 PE=1 SV=1                                                                          | 0.886666667 |
| Qars     | Q8BML9 | Glutamine--tRNA ligase OS=Mus musculus OX=10090 GN=Qars1 PE=1 SV=1                                                              | 0.923333333 |
| Cct2     | P80314 | T-complex protein 1 subunit beta OS=Mus musculus OX=10090 GN=Cct2 PE=1 SV=4                                                     | 0.9         |
| Hnrnpl   | Q8R081 | Heterogeneous nuclear ribonucleoprotein L OS=Mus musculus OX=10090 GN=Hnrnpl PE=1 SV=2                                          | 0.876666667 |
| Pa2g4    | P50580 | Proliferation-associated protein 2G4 OS=Mus musculus OX=10090 GN=Pa2g4 PE=1 SV=3                                                | 0.9         |
| Lgals1   | P16045 | Galectin-1 OS=Mus musculus OX=10090 GN=Lgals1 PE=1 SV=3                                                                         | 0.87        |
| Cul1     | Q9WTX6 | Cullin-1 OS=Mus musculus OX=10090 GN=Cul1 PE=1 SV=1                                                                             | 0.946666667 |
| Kars1    | Q99MN1 | Lysine--tRNA ligase OS=Mus musculus OX=10090 GN=Kars1 PE=1 SV=1                                                                 | 0.906666667 |
| Palld    | Q9ET54 | Palladin OS=Mus musculus OX=10090 GN=Palld PE=1 SV=2                                                                            | 0.803333333 |
| Nup214   | Q80U93 | Nuclear pore complex protein Nup214 OS=Mus musculus OX=10090 GN=Nup214 PE=1 SV=2                                                | 0.853333333 |
| Tmpo     | Q61033 | Lamina-associated polypeptide 2 isoforms alpha/zeta OS=Mus musculus OX=10090 GN=Tmpo PE=1 SV=1                                  | 0.816666667 |
| Ddx17    | Q501J6 | Probable ATP-dependent RNA helicase DDX17 OS=Mus musculus OX=10090 GN=Ddx17 PE=1 SV=1                                           | 0.893333333 |
| Ppp2r1a  | Q76MZ3 | Serine/threonine-protein phosphatase 2A 65 kDa regulatory subunit A alpha isoform OS=Mus musculus OX=10090 GN=Ppp2r1a PE=1 SV=1 | 0.823333333 |
| Gfpt1    | P47856 | Glutamine--fructose-6-phosphate aminotransferase [isomerizing] 1 OS=Mus musculus OX=10090 GN=Gfpt1 PE=1 SV=1                    | 0.9         |
| Clip1    | Q922J3 | CAP-Gly domain-containing linker protein 1 OS=Mus musculus OX=10090 GN=Clip1 PE=1 SV=1                                          | 0.88        |
| Impdh2   | P24547 | Inosine-5'-monophosphate dehydrogenase 2 OS=Mus musculus OX=10090 GN=Impdh2 PE=1 SV=2                                           | 0.926666667 |
| Cand2    | Q6ZQ73 | Cullin-associated NEDD8-dissociated protein 2 OS=Mus musculus OX=10090 GN=Cand2 PE=1 SV=2                                       | 0.826666667 |
| Phgdh    | Q61753 | D-3-phosphoglycerate dehydrogenase OS=Mus musculus OX=10090 GN=Phgdh PE=1 SV=3                                                  | 0.866666667 |
| Mrip     | P97434 | Myosin phosphatase Rho-interacting protein OS=Mus musculus OX=10090 GN=Mrip PE=1 SV=2                                           | 0.846666667 |



|          |        |                                                                                                 |             |
|----------|--------|-------------------------------------------------------------------------------------------------|-------------|
| Ubr2     | Q6WKZ8 | E3 ubiquitin-protein ligase UBR2 OS=Mus musculus OX=10090 GN=Ubr2 PE=1 SV=2                     | 0.896666667 |
| Atp5f1a  | Q03265 | ATP synthase subunit alpha mitochondrial OS=Mus musculus OX=10090 GN=Atp5f1a PE=1 SV=1          | 0.91        |
| Ckap4    | Q8BMK4 | Cytoskeleton-associated protein 4 OS=Mus musculus OX=10090 GN=Ckap4 PE=1 SV=2                   | 0.896666667 |
| Calr     | P14211 | Calreticulin OS=Mus musculus OX=10090 GN=Calr PE=1 SV=1                                         | 0.88        |
| Trim28   | Q62318 | Transcription intermediary factor 1-beta OS=Mus musculus OX=10090 GN=Trim28 PE=1 SV=3           | 0.876666667 |
| Mcm7     | Q61881 | DNA replication licensing factor MCM7 OS=Mus musculus OX=10090 GN=Mcm7 PE=1 SV=1                | 0.896666667 |
| Mars     | Q68FL6 | Methionine--tRNA ligase cytoplasmic OS=Mus musculus OX=10090 GN=Mars1 PE=1 SV=1                 | 0.883333333 |
| FAM120A  | Q6A0A9 | Constitutive coactivator of PPAR-gamma-like protein 1 OS=Mus musculus OX=10090 GN=FAM120A       | 0.846666667 |
| Gmps     | Q3THK7 | GMP synthase [glutamine-hydrolyzing] OS=Mus musculus OX=10090 GN=Gmps PE=1 SV=2                 | 0.896666667 |
| Dars     | Q922B2 | Aspartate--tRNA ligase cytoplasmic OS=Mus musculus OX=10090 GN=Dars1 PE=1 SV=2                  | 0.903333333 |
| Cars     | Q9ER72 | Cysteine--tRNA ligase cytoplasmic OS=Mus musculus OX=10090 GN=Cars1 PE=1 SV=2                   | 0.966666667 |
| Dis3     | Q9CSH3 | Exosome complex exonuclease RRP44 OS=Mus musculus OX=10090 GN=Dis3 PE=1 SV=4                    | 0.876666667 |
| Gpd2     | Q64521 | Glycerol-3-phosphate dehydrogenase mitochondrial OS=Mus musculus OX=10090 GN=Gpd2 PE=1 SV=1     | 0.923333333 |
| Anapc1   | P53995 | Anaphase-promoting complex subunit 1 OS=Mus musculus OX=10090 GN=Anapc1 PE=1 SV=2               | 0.903333333 |
| Cluh     | Q5SW19 | Clustered mitochondria protein homolog OS=Mus musculus OX=10090 GN=Cluh PE=1 SV=2               | 0.94        |
| Itgav    | P43406 | Integrin alpha-V OS=Mus musculus OX=10090 GN=Itgav PE=1 SV=2                                    | 0.933333333 |
| Hspa1b   | P17879 | Heat shock 70 kDa protein 1B OS=Mus musculus OX=10090 GN=Hspa1b PE=1 SV=3                       | 0.853333333 |
| Tnpo1    | Q8BFY9 | Transportin-1 OS=Mus musculus OX=10090 GN=Tnpo1 PE=1 SV=2                                       | 0.886666667 |
| Hnrnpa1  | P49312 | Heterogeneous nuclear ribonucleoprotein A1 OS=Mus musculus OX=10090 GN=Hnrnpa1 PE=1 SV=2        | 0.876666667 |
| Hk2      | O08528 | Hexokinase-2 OS=Mus musculus OX=10090 GN=Hk2 PE=1 SV=1                                          | 0.9         |
| Naa15    | Q80UM3 | N-alpha-acetyltransferase 15 NatA auxiliary subunit OS=Mus musculus OX=10090 GN=Naa15 PE=1 SV=1 | 0.863333333 |
| Usp15    | Q8R5H1 | Ubiquitin carboxyl-terminal hydrolase 15 OS=Mus musculus OX=10090 GN=Usp15 PE=1 SV=1            | 0.896666667 |
| Anxa1    | P10107 | Annexin A1 OS=Mus musculus OX=10090 GN=Anxa1 PE=1 SV=2                                          | 0.856666667 |
| Sfpq     | Q8VIJ6 | Splicing factor proline- and glutamine-rich OS=Mus musculus OX=10090 GN=Sfpq PE=1 SV=1          | 0.846666667 |
| Parp1    | P11103 | Poly [ADP-ribose] polymerase 1 OS=Mus musculus OX=10090 GN=Parp1 PE=1 SV=3                      | 0.923333333 |
| Wdr1     | O88342 | WD repeat-containing protein 1 OS=Mus musculus OX=10090 GN=Wdr1 PE=1 SV=3                       | 0.903333333 |
| Anxa2    | P07356 | Annexin A2 OS=Mus musculus OX=10090 GN=Anxa2 PE=1 SV=2                                          | 0.883333333 |
| Aldh18a1 | Q9Z110 | Delta-1-pyrroline-5-carboxylate synthase OS=Mus musculus OX=10090 GN=Aldh18a1 PE=1 SV=2         | 0.876666667 |
| Atic     | Q9CWI9 | Bifunctional purine biosynthesis protein ATIC OS=Mus musculus OX=10090 GN=Atic PE=1 SV=2        | 0.866666667 |
| Ddx1     | Q91VR5 | ATP-dependent RNA helicase DDX1 OS=Mus musculus OX=10090 GN=Ddx1 PE=1 SV=1                      | 0.896666667 |
| Uso1     | Q9Z1Z0 | General vesicular transport factor p115 OS=Mus musculus OX=10090 GN=Uso1 PE=1 SV=2              | 0.89        |
| Vps35    | Q9EQH3 | Vacuolar protein sorting-associated protein 35 OS=Mus musculus OX=10090 GN=Vps35 PE=1 SV=1      | 0.876666667 |
| Immt     | Q8CAQ8 | MICOS complex subunit Mic60 OS=Mus musculus OX=10090 GN=Immt PE=1 SV=1                          | 0.903333333 |
| Farp1    | F8VPU2 | FERM ARHGEF and pleckstrin domain-containing protein 1 OS=Mus musculus OX=10090 GN=Farp1        | 0.873333333 |

|           |        |                                                                                                                            |             |
|-----------|--------|----------------------------------------------------------------------------------------------------------------------------|-------------|
| Nomo1     | Q6GQT9 | Nodal modulator 1 OS=Mus musculus OX=10090 GN=Nomo1 PE=1 SV=1                                                              | 0.876666667 |
| Cct4      | P80315 | T-complex protein 1 subunit delta OS=Mus musculus OX=10090 GN=Cct4 PE=1 SV=3                                               | 0.896666667 |
| Rai14     | Q9EP71 | Ankycorbin OS=Mus musculus OX=10090 GN=Rai14 PE=1 SV=1                                                                     | 0.856666667 |
| Prrc2a    | Q7TSC1 | Protein PRRC2A OS=Mus musculus OX=10090 GN=Prrc2a PE=1 SV=1                                                                | 0.776666667 |
| Hcfc1     | Q61191 | Host cell factor 1 OS=Mus musculus OX=10090 GN=Hcfc1 PE=1 SV=2                                                             | 0.84        |
| Eef1g     | Q9D8N0 | Elongation factor 1-gamma OS=Mus musculus OX=10090 GN=Eef1g PE=1 SV=3                                                      | 0.903333333 |
| Rpn1      | Q91YQ5 | Dolichyl-diphosphooligosaccharide--protein glycosyltransferase subunit 1 OS=Mus musculus OX=10090 GN=Rpn1 PE=1 SV=1        | 0.916666667 |
| Ctnnd1    | P30999 | Catenin delta-1 OS=Mus musculus OX=10090 GN=Ctnnd1 PE=1 SV=2                                                               | 0.88        |
| Gars1     | Q9CZD3 | Glycine--tRNA ligase OS=Mus musculus OX=10090 GN=Gars1 PE=1 SV=1                                                           | 0.87        |
| Mrc2      | Q64449 | C-type mannose receptor 2 OS=Mus musculus OX=10090 GN=Mrc2 PE=1 SV=3                                                       | 0.933333333 |
| G6pdx     | Q00612 | Glucose-6-phosphate 1-dehydrogenase X OS=Mus musculus OX=10090 GN=G6pdx PE=1 SV=3                                          | 0.883333333 |
| Aldh1l2   | Q8K009 | Mitochondrial 10-formyltetrahydrofolate dehydrogenase OS=Mus musculus OX=10090 GN=Aldh1l2 PE=1 SV=1                        | 0.836666667 |
| Nckap1    | P28660 | Nck-associated protein 1 OS=Mus musculus OX=10090 GN=Nckap1 PE=1 SV=2                                                      | 0.85        |
| Csde1     | Q91W50 | Cold shock domain-containing protein E1 OS=Mus musculus OX=10090 GN=Csde1 PE=1 SV=1                                        | 0.906666667 |
| Supt16h   | Q920B9 | FACT complex subunit SPT16 OS=Mus musculus OX=10090 GN=Supt16h PE=1 SV=2                                                   | 0.91        |
| Anln      | Q8K298 | Anillin OS=Mus musculus OX=10090 GN=Anln PE=1 SV=2                                                                         | 0.87        |
| Myo5a     | Q99104 | Unconventional myosin-Va OS=Mus musculus OX=10090 GN=Myo5a PE=1 SV=2                                                       | 0.88        |
| Cul4a     | Q3TCH7 | Cullin-4A OS=Mus musculus OX=10090 GN=Cul4a PE=1 SV=1                                                                      | 0.89        |
| Ctnna1    | P26231 | Catenin alpha-1 OS=Mus musculus OX=10090 GN=Ctnna1 PE=1 SV=1                                                               | 0.896666667 |
| Ldha      | P06151 | L-lactate dehydrogenase A chain OS=Mus musculus OX=10090 GN=Ldha PE=1 SV=3                                                 | 0.876666667 |
| Aco2      | Q99KI0 | Aconitate hydratase mitochondrial OS=Mus musculus OX=10090 GN=Aco2 PE=1 SV=1                                               | 0.893333333 |
| Fkbp4     | P30416 | Peptidyl-prolyl cis-trans isomerase FKBP4 OS=Mus musculus OX=10090 GN=Fkbp4 PE=1 SV=5                                      | 0.893333333 |
| Ncl       | P09405 | Nucleolin OS=Mus musculus OX=10090 GN=Ncl PE=1 SV=2                                                                        | 0.88        |
| Edc4      | Q3UJB9 | Enhancer of mRNA-decapping protein 4 OS=Mus musculus OX=10090 GN=Edc4 PE=1 SV=2                                            | 0.876666667 |
| Pls3      | Q99K51 | Plastin-3 OS=Mus musculus OX=10090 GN=Pls3 PE=1 SV=3                                                                       | 0.836666667 |
| Usp5      | P56399 | Ubiquitin carboxyl-terminal hydrolase 5 OS=Mus musculus OX=10090 GN=Usp5 PE=1 SV=1                                         | 0.893333333 |
| Flii      | Q9JJ28 | Protein flightless-1 homolog OS=Mus musculus OX=10090 GN=Flii PE=1 SV=1                                                    | 0.916666667 |
| Nup93     | Q8BJ71 | Nuclear pore complex protein Nup93 OS=Mus musculus OX=10090 GN=Nup93 PE=1 SV=1                                             | 0.886666667 |
| Ogt       | Q8CGY8 | UDP-N-acetylglucosamine--peptide N-acetylglucosaminyltransferase 110 kDa subunit OS=Mus musculus OX=10090 GN=Ogt PE=1 SV=1 | 0.92        |
| Xrn2      | Q9DBR1 | 5'-3' exoribonuclease 2 OS=Mus musculus OX=10090 GN=Xrn2 PE=1 SV=1                                                         | 0.886666667 |
| Ap2b1     | Q9DBG3 | AP-2 complex subunit beta OS=Mus musculus OX=10090 GN=Ap2b1 PE=1 SV=1                                                      | 0.876666667 |
| Ap2a2     | P17427 | AP-2 complex subunit alpha-2 OS=Mus musculus OX=10090 GN=Ap2a2 PE=1 SV=2                                                   | 0.923333333 |
| Ddx5      | Q61656 | Probable ATP-dependent RNA helicase DDX5 OS=Mus musculus OX=10090 GN=Ddx5 PE=1 SV=2                                        | 0.903333333 |
| Hnrnpa2b1 | O88569 | Heterogeneous nuclear ribonucleoproteins A2/B1 OS=Mus musculus OX=10090 GN=Hnrnpa2b1 PE=1 SV=1                             | 0.846666667 |

|        |        |                                                                                                  |             |
|--------|--------|--------------------------------------------------------------------------------------------------|-------------|
| Copg1  | Q9QZE5 | Coatomer subunit gamma-1 OS=Mus musculus OX=10090 GN=Copg1 PE=1 SV=1                             | 0.903333333 |
| Pdia4  | P08003 | Protein disulfide-isomerase A4 OS=Mus musculus OX=10090 GN=Pdia4 PE=1 SV=3                       | 0.903333333 |
| Clasp1 | Q80TV8 | CLIP-associating protein 1 OS=Mus musculus OX=10090 GN=Clasp1 PE=1 SV=2                          | 0.903333333 |
| Anxa6  | P14824 | Annexin A6 OS=Mus musculus OX=10090 GN=Anxa6 PE=1 SV=3                                           | 0.88        |
| Tkt    | P40142 | Transketolase OS=Mus musculus OX=10090 GN=Tkt PE=1 SV=1                                          | 0.88        |
| Eif5b  | Q05D44 | Eukaryotic translation initiation factor 5B OS=Mus musculus OX=10090 GN=Eif5b PE=1 SV=2          | 0.86        |
| Rtn4   | Q99P72 | Reticulon-4 OS=Mus musculus OX=10090 GN=Rtn4 PE=1 SV=2                                           | 0.846666667 |
| Gart   | Q64737 | Trifunctional purine biosynthetic protein adenosine-3 OS=Mus musculus OX=10090 GN=Gart PE=1 SV=1 | 0.866666667 |
| Atp2a2 | O55143 | Sarcoplasmic/endoplasmic reticulum calcium ATPase 2 OS=Mus musculus OX=10090 GN=Atp2a2 PE=1 SV=1 | 0.903333333 |
| Ap3d1  | O54774 | AP-3 complex subunit delta-1 OS=Mus musculus OX=10090 GN=Ap3d1 PE=1 SV=1                         | 0.833333333 |
| Xpo5   | Q924C1 | Exportin-5 OS=Mus musculus OX=10090 GN=Xpo5 PE=1 SV=1                                            | 0.893333333 |
| Dnm1l  | Q8K1M6 | Dynamin-1-like protein OS=Mus musculus OX=10090 GN=Dnm1l PE=1 SV=2                               | 0.88        |
| Rrp12  | Q6P5B0 | RRP12-like protein OS=Mus musculus OX=10090 GN=Rrp12 PE=1 SV=1                                   | 0.92        |
| Rrm1   | P07742 | Ribonucleoside-diphosphate reductase large subunit OS=Mus musculus OX=10090 GN=Rrm1 PE=1 SV=1    | 0.863333333 |
| Plxnb2 | B2RXS4 | Plexin-B2 OS=Mus musculus OX=10090 GN=Plxnb2 PE=1 SV=1                                           | 0.893333333 |
| Nrdc   | Q8BHG1 | Nardilysin OS=Mus musculus OX=10090 GN=Nrdc PE=1 SV=1                                            | 0.873333333 |
| Polr2a | P08775 | DNA-directed RNA polymerase II subunit RPB1 OS=Mus musculus OX=10090 GN=Polr2a PE=1 SV=3         | 0.876666667 |
| Ipo4   | Q8VI75 | Importin-4 OS=Mus musculus OX=10090 GN=Ipo4 PE=1 SV=1                                            | 0.91        |
| Tuba8  | Q9JJZ2 | Tubulin alpha-8 chain OS=Mus musculus OX=10090 GN=Tuba8 PE=1 SV=1                                |             |
| Tubb3  | Q9ERD7 | Tubulin beta-3 chain OS=Mus musculus OX=10090 GN=Tubb3 PE=1 SV=1                                 | 0.946666667 |
| Lmnb1  | P14733 | Lamin-B1 OS=Mus musculus OX=10090 GN=Lmnb1 PE=1 SV=3                                             | 0.883333333 |
| Ddx3x  | Q62167 | ATP-dependent RNA helicase DDX3X OS=Mus musculus OX=10090 GN=Ddx3x PE=1 SV=3                     | 0.91        |
| Tcp1   | P11983 | T-complex protein 1 subunit alpha OS=Mus musculus OX=10090 GN=Tcp1 PE=1 SV=3                     | 0.89        |
| Canx   | P35564 | Calnexin OS=Mus musculus OX=10090 GN=Canx PE=1 SV=1                                              | 0.876666667 |
| Gsn    | P13020 | Gelsolin OS=Mus musculus OX=10090 GN=Gsn PE=1 SV=3                                               | 0.853333333 |
| Cct7   | P80313 | T-complex protein 1 subunit eta OS=Mus musculus OX=10090 GN=Cct7 PE=1 SV=1                       | 0.88        |
| Matr3  | Q8K310 | Matrin-3 OS=Mus musculus OX=10090 GN=Matr3 PE=1 SV=1                                             | 0.87        |
| Hyou1  | Q9JKR6 | Hypoxia up-regulated protein 1 OS=Mus musculus OX=10090 GN=Hyou1 PE=1 SV=1                       | 0.866666667 |
| Pfas   | Q5SUR0 | Phosphoribosylformylglycinamide synthase OS=Mus musculus OX=10090 GN=Pfas PE=1 SV=1              | 0.846666667 |
| Gemin5 | Q8BX17 | Gem-associated protein 5 OS=Mus musculus OX=10090 GN=Gemin5 PE=1 SV=2                            | 0.886666667 |
| Pola1  | P33609 | DNA polymerase alpha catalytic subunit OS=Mus musculus OX=10090 GN=Pola1 PE=1 SV=2               | 0.833333333 |
| Ascc3  | E9PZJ8 | Activating signal cointegrator 1 complex subunit 3 OS=Mus musculus OX=10090 GN=Ascc3 PE=1 SV=1   | 0.91        |
| Eno1   | P17182 | Alpha-enolase OS=Mus musculus OX=10090 GN=Eno1 PE=1 SV=3                                         | 0.893333333 |
| Cul4b  | A2A432 | Cullin-4B OS=Mus musculus OX=10090 GN=Cul4b PE=1 SV=1                                            | 0.86        |

|         |        |                                                                                                 |            |
|---------|--------|-------------------------------------------------------------------------------------------------|------------|
| Ap2a1   | P17426 | AP-2 complex subunit alpha-1 OS=Mus musculus OX=10090 GN=Ap2a1 PE=1 SV=1                        | 0.91       |
| Kif5b   | Q61768 | Kinesin-1 heavy chain OS=Mus musculus OX=10090 GN=Kif5b PE=1 SV=3                               | 0.90666667 |
| Pabpc1  | P29341 | Polyadenylate-binding protein 1 OS=Mus musculus OX=10090 GN=Pabpc1 PE=1 SV=2                    | 0.89666667 |
| Cct5    | P80316 | T-complex protein 1 subunit epsilon OS=Mus musculus OX=10090 GN=Cct5 PE=1 SV=1                  | 0.90333333 |
| Npepps  | Q11011 | Puromycin-sensitive aminopeptidase OS=Mus musculus OX=10090 GN=Npepps PE=1 SV=2                 | 0.85       |
| Eif3b   | Q8JZQ9 | Eukaryotic translation initiation factor 3 subunit B OS=Mus musculus OX=10090 GN=Eif3b PE=1 SV= | 0.89       |
| Pdcd6ip | Q9WU78 | Programmed cell death 6-interacting protein OS=Mus musculus OX=10090 GN=Pdcd6ip PE=1 SV=3       | 0.85333333 |
| Srrm2   | Q8BTI8 | Serine/arginine repetitive matrix protein 2 OS=Mus musculus OX=10090 GN=Srrm2 PE=1 SV=3         | 0.82666667 |
| Eif4g2  | Q62448 | Eukaryotic translation initiation factor 4 gamma 2 OS=Mus musculus OX=10090 GN=Eif4g2 PE=1 SV   | 0.85333333 |
| Pitrm1  | Q8K411 | Presequence protease mitochondrial OS=Mus musculus OX=10090 GN=Pitrm1 PE=1 SV=1                 | 0.87666667 |
| Smc2    | Q8CG48 | Structural maintenance of chromosomes protein 2 OS=Mus musculus OX=10090 GN=Smc2 PE=1 SV        | 0.89666667 |
| Msh6    | P54276 | DNA mismatch repair protein Msh6 OS=Mus musculus OX=10090 GN=Msh6 PE=1 SV=3                     | 0.88333333 |
| Tubb6   | Q922F4 | Tubulin beta-6 chain OS=Mus musculus OX=10090 GN=Tubb6 PE=1 SV=1                                | 0.88666667 |
| Eif4a1  | P60843 | Eukaryotic initiation factor 4A-I OS=Mus musculus OX=10090 GN=Eif4a1 PE=1 SV=1                  | 0.89       |
| Gdi2    | Q61598 | Rab GDP dissociation inhibitor beta OS=Mus musculus OX=10090 GN=Gdi2 PE=1 SV=1                  | 0.89333333 |
| Hspa9   | P38647 | Stress-70 protein mitochondrial OS=Mus musculus OX=10090 GN=Hspa9 PE=1 SV=3                     | 0.87666667 |
| Cct3    | P80318 | T-complex protein 1 subunit gamma OS=Mus musculus OX=10090 GN=Cct3 PE=1 SV=1                    | 0.89666667 |
| Hnrnpu  | Q8VEK3 | Heterogeneous nuclear ribonucleoprotein U OS=Mus musculus OX=10090 GN=Hnrnpu PE=1 SV=1          | 0.86       |
| Mcm4    | P49717 | DNA replication licensing factor MCM4 OS=Mus musculus OX=10090 GN=Mcm4 PE=1 SV=1                | 0.91       |
| Mcm6    | P97311 | DNA replication licensing factor MCM6 OS=Mus musculus OX=10090 GN=Mcm6 PE=1 SV=1                | 0.9        |
| Rars    | Q9D0I9 | Arginine--tRNA ligase cytoplasmic OS=Mus musculus OX=10090 GN=Rars1 PE=1 SV=2                   | 0.89666667 |
| Mcm2    | P97310 | DNA replication licensing factor MCM2 OS=Mus musculus OX=10090 GN=Mcm2 PE=1 SV=3                | 0.86666667 |
| Smc4    | Q8CG47 | Structural maintenance of chromosomes protein 4 OS=Mus musculus OX=10090 GN=Smc4 PE=1 SV        | 0.9        |
| Atp1a1  | Q8VDN2 | Sodium/potassium-transporting ATPase subunit alpha-1 OS=Mus musculus OX=10090 GN=Atp1a1 F       | 0.89333333 |
| P4hb    | P09103 | Protein disulfide-isomerase OS=Mus musculus OX=10090 GN=P4hb PE=1 SV=2                          | 0.9        |
| Uba6    | Q8C7R4 | Ubiquitin-like modifier-activating enzyme 6 OS=Mus musculus OX=10090 GN=Uba6 PE=1 SV=1          | 0.91333333 |
| Mcm5    | P49718 | DNA replication licensing factor MCM5 OS=Mus musculus OX=10090 GN=Mcm5 PE=1 SV=2                | 0.88333333 |
| Prrc2c  | Q3TLH4 | Protein PRRC2C OS=Mus musculus OX=10090 GN=Prrc2c PE=1 SV=3                                     | 0.82       |
| Xpo1    | Q6P5F9 | Exportin-1 OS=Mus musculus OX=10090 GN=Xpo1 PE=1 SV=1                                           | 0.88666667 |
| Ppfibp1 | Q8C8U0 | Liprin-beta-1 OS=Mus musculus OX=10090 GN=Ppfibp1 PE=1 SV=3                                     | 0.85       |
| Map4    | P27546 | Microtubule-associated protein 4 OS=Mus musculus OX=10090 GN=Map4 PE=1 SV=3                     | 0.83333333 |
| Nsun2   | Q1HFZ0 | RNA cytosine C(5)-methyltransferase NSUN2 OS=Mus musculus OX=10090 GN=Nsun2 PE=1 SV=2           | 0.88       |
| Nup98   | Q6PFD9 | Nuclear pore complex protein Nup98-Nup96 OS=Mus musculus OX=10090 GN=Nup98 PE=1 SV=2            | 0.92       |
| Smarca5 | Q91ZW3 | SWI/SNF-related matrix-associated actin-dependent regulator of chromatin subfamily A member 5 ( | 0.86666667 |

|         |        |                                                                                               |             |
|---------|--------|-----------------------------------------------------------------------------------------------|-------------|
| Pgk1    | P09411 | Phosphoglycerate kinase 1 OS=Mus musculus OX=10090 GN=Pgk1 PE=1 SV=4                          | 0.86        |
| Pds5a   | Q6A026 | Sister chromatid cohesion protein PDS5 homolog A OS=Mus musculus OX=10090 GN=Pds5a PE=1 SV=1  | 0.903333333 |
| Mcm3    | P25206 | DNA replication licensing factor MCM3 OS=Mus musculus OX=10090 GN=Mcm3 PE=1 SV=2              | 0.906666667 |
| Atrx    | Q61687 | Transcriptional regulator ATRX OS=Mus musculus OX=10090 GN=Atrx PE=1 SV=3                     | 0.853333333 |
| Cse1l   | Q9ERK4 | Exportin-2 OS=Mus musculus OX=10090 GN=Cse1l PE=1 SV=1                                        | 0.886666667 |
| Cct8    | P42932 | T-complex protein 1 subunit theta OS=Mus musculus OX=10090 GN=Cct8 PE=1 SV=3                  | 0.906666667 |
| Ogdh    | Q60597 | 2-oxoglutarate dehydrogenase mitochondrial OS=Mus musculus OX=10090 GN=Ogdh PE=1 SV=3         | 0.916666667 |
| Igf2r   | Q07113 | Cation-independent mannose-6-phosphate receptor OS=Mus musculus OX=10090 GN=Igf2r PE=1 SV=1   | 0.88        |
| Msn     | P26041 | Moesin OS=Mus musculus OX=10090 GN=Msn PE=1 SV=3                                              | 0.886666667 |
| Aldoa   | P05064 | Fructose-bisphosphate aldolase A OS=Mus musculus OX=10090 GN=Aldoa PE=1 SV=2                  | 0.856666667 |
| Nedd4   | P46935 | E3 ubiquitin-protein ligase NEDD4 OS=Mus musculus OX=10090 GN=Nedd4 PE=1 SV=3                 | 0.86        |
| Tars1   | Q9D0R2 | Threonine--tRNA ligase 1 cytoplasmic OS=Mus musculus OX=10090 GN=Tars1 PE=1 SV=2              | 0.87        |
| Mthfd1  | Q922D8 | C-1-tetrahydrofolate synthase cytoplasmic OS=Mus musculus OX=10090 GN=Mthfd1 PE=1 SV=4        | 0.86        |
| Myo1c   | Q9WTI7 | Unconventional myosin-Ic OS=Mus musculus OX=10090 GN=Myo1c PE=1 SV=2                          | 0.883333333 |
| Hspd1   | P63038 | 60 kDa heat shock protein mitochondrial OS=Mus musculus OX=10090 GN=Hspd1 PE=1 SV=1           | 0.896666667 |
| Ipo7    | Q9EPL8 | Importin-7 OS=Mus musculus OX=10090 GN=Ipo7 PE=1 SV=2                                         | 0.896666667 |
| Prep    | Q9QUR6 | Prolyl endopeptidase OS=Mus musculus OX=10090 GN=Prep PE=1 SV=1                               | 0.886666667 |
| Cyfp1   | Q7TMB8 | Cytoplasmic FMR1-interacting protein 1 OS=Mus musculus OX=10090 GN=Cyfp1 PE=1 SV=1            | 0.87        |
| Lamb1   | P02469 | Laminin subunit beta-1 OS=Mus musculus OX=10090 GN=Lamb1 PE=1 SV=3                            | 0.89        |
| Trip12  | G5E870 | E3 ubiquitin-protein ligase TRIP12 OS=Mus musculus OX=10090 GN=Trip12 PE=1 SV=1               | 0.843333333 |
| Mthfd1l | Q3V3R1 | Monofunctional C1-tetrahydrofolate synthase mitochondrial OS=Mus musculus OX=10090 GN=Mthfd1l | 0.86        |
| Rrbp1   | Q99PL5 | Ribosome-binding protein 1 OS=Mus musculus OX=10090 GN=Rrbp1 PE=1 SV=2                        | 0.896666667 |
| Psmd2   | Q8VDM4 | 26S proteasome non-ATPase regulatory subunit 2 OS=Mus musculus OX=10090 GN=Psmd2 PE=1 SV=1    | 0.883333333 |
| Psmd1   | Q3TXS7 | 26S proteasome non-ATPase regulatory subunit 1 OS=Mus musculus OX=10090 GN=Psmd1 PE=1 SV=1    | 0.873333333 |
| Hnrnpm  | Q9D0E1 | Heterogeneous nuclear ribonucleoprotein M OS=Mus musculus OX=10090 GN=Hnrnpm PE=1 SV=3        | 0.886666667 |
| Sf3b3   | Q921M3 | Splicing factor 3B subunit 3 OS=Mus musculus OX=10090 GN=Sf3b3 PE=1 SV=1                      | 0.896666667 |
| Usp47   | Q8BY87 | Ubiquitin carboxyl-terminal hydrolase 47 OS=Mus musculus OX=10090 GN=Usp47 PE=1 SV=2          | 0.84        |
| Hectd1  | Q69ZR2 | E3 ubiquitin-protein ligase HECTD1 OS=Mus musculus OX=10090 GN=Hectd1 PE=1 SV=2               | 0.936666667 |
| Pds5b   | Q4VA53 | Sister chromatid cohesion protein PDS5 homolog B OS=Mus musculus OX=10090 GN=Pds5b PE=1 SV=1  | 0.946666667 |
| Hsph1   | Q61699 | Heat shock protein 105 kDa OS=Mus musculus OX=10090 GN=Hsph1 PE=1 SV=2                        | 0.863333333 |
| Eftud2  | O08810 | 116 kDa U5 small nuclear ribonucleoprotein component OS=Mus musculus OX=10090 GN=Eftud2       | 0.863333333 |
| Stip1   | Q60864 | Stress-induced-phosphoprotein 1 OS=Mus musculus OX=10090 GN=Stip1 PE=1 SV=1                   | 0.9         |
| Glg1    | Q61543 | Golgi apparatus protein 1 OS=Mus musculus OX=10090 GN=Glg1 PE=1 SV=1                          | 0.87        |
| Copb2   | O55029 | Coatamer subunit beta' OS=Mus musculus OX=10090 GN=Copb2 PE=1 SV=2                            | 0.86        |



|          |        |                                                                                              |             |
|----------|--------|----------------------------------------------------------------------------------------------|-------------|
| Ncapd2   | Q8K2Z4 | Condensin complex subunit 1 OS=Mus musculus OX=10090 GN=Ncapd2 PE=1 SV=2                     | 0.823333333 |
| Smc1a    | Q9CU62 | Structural maintenance of chromosomes protein 1A OS=Mus musculus OX=10090 GN=Smc1a PE=1 SV=2 | 0.9         |
| Tjp1     | P39447 | Tight junction protein ZO-1 OS=Mus musculus OX=10090 GN=Tjp1 PE=1 SV=2                       | 0.86        |
| Baz1b    | Q9Z277 | Tyrosine-protein kinase BAZ1B OS=Mus musculus OX=10090 GN=Baz1b PE=1 SV=2                    | 0.933333333 |
| Rnf213   | E9Q555 | E3 ubiquitin-protein ligase RNF213 OS=Mus musculus OX=10090 GN=Rnf213 PE=1 SV=2              | 0.886666667 |
| Pdia3    | P27773 | Protein disulfide-isomerase A3 OS=Mus musculus OX=10090 GN=Pdia3 PE=1 SV=2                   | 0.926666667 |
| Epb41l2  | O70318 | Band 4.1-like protein 2 OS=Mus musculus OX=10090 GN=Epb41l2 PE=1 SV=2                        | 0.823333333 |
| Sec31a   | Q3UPL0 | Protein transport protein Sec31A OS=Mus musculus OX=10090 GN=Sec31a PE=1 SV=2                | 0.89        |
| Copb1    | Q9JIF7 | Coatamer subunit beta OS=Mus musculus OX=10090 GN=Copb1 PE=1 SV=1                            | 0.863333333 |
| Lars     | Q8BMJ2 | Leucine--tRNA ligase cytoplasmic OS=Mus musculus OX=10090 GN=Lars1 PE=1 SV=2                 | 0.863333333 |
| Smc3     | Q9CW03 | Structural maintenance of chromosomes protein 3 OS=Mus musculus OX=10090 GN=Smc3 PE=1 SV=2   | 0.893333333 |
| Itpr3    | P70227 | Inositol 1 4 5-trisphosphate receptor type 3 OS=Mus musculus OX=10090 GN=Itpr3 PE=1 SV=3     | 0.83        |
| Hspa4    | Q61316 | Heat shock 70 kDa protein 4 OS=Mus musculus OX=10090 GN=Hspa4 PE=1 SV=1                      | 0.883333333 |
| Hdlbp    | Q8VDJ3 | Vigilin OS=Mus musculus OX=10090 GN=Hdlbp PE=1 SV=1                                          | 0.9         |
| Ganab    | Q8BHN3 | Neutral alpha-glucosidase AB OS=Mus musculus OX=10090 GN=Ganab PE=1 SV=1                     | 0.866666667 |
| Dhx9     | O70133 | ATP-dependent RNA helicase A OS=Mus musculus OX=10090 GN=Dhx9 PE=1 SV=2                      | 0.936666667 |
| Tnks1bp1 | P58871 | 182 kDa tankyrase-1-binding protein OS=Mus musculus OX=10090 GN=Tnks1bp1 PE=1 SV=2           | 0.81        |
| Aars     | Q8BGQ7 | Alanine--tRNA ligase cytoplasmic OS=Mus musculus OX=10090 GN=Aars1 PE=1 SV=1                 | 0.883333333 |
| Kpnb1    | P70168 | Importin subunit beta-1 OS=Mus musculus OX=10090 GN=Kpnb1 PE=1 SV=2                          | 0.873333333 |
| Ecpas    | Q6PDI5 | Proteasome adapter and scaffold protein ECM29 OS=Mus musculus OX=10090 GN=Ecpas PE=1 SV=3    | 0.87        |
| Ktn1     | Q61595 | Kinectin OS=Mus musculus OX=10090 GN=Ktn1 PE=1 SV=1                                          | 0.896666667 |
| Dctn1    | O08788 | Dynactin subunit 1 OS=Mus musculus OX=10090 GN=Dctn1 PE=1 SV=3                               | 0.896666667 |
| Top2b    | Q64511 | DNA topoisomerase 2-beta OS=Mus musculus OX=10090 GN=Top2b PE=1 SV=2                         | 0.916666667 |
| Upf1     | Q9EPU0 | Regulator of nonsense transcripts 1 OS=Mus musculus OX=10090 GN=Upf1 PE=1 SV=2               | 0.906666667 |
| Gapdh    | P16858 | Glyceraldehyde-3-phosphate dehydrogenase OS=Mus musculus OX=10090 GN=Gapdh PE=1 SV=2         | 0.893333333 |
| Eea1     | Q8BL66 | Early endosome antigen 1 OS=Mus musculus OX=10090 GN=Eea1 PE=1 SV=2                          | 0.866666667 |
| Hspa5    | P20029 | Endoplasmic reticulum chaperone BiP OS=Mus musculus OX=10090 GN=Hspa5 PE=1 SV=3              | 0.89        |
| Lmna     | P48678 | Prelamin-A/C OS=Mus musculus OX=10090 GN=Lmna PE=1 SV=2                                      | 0.876666667 |
| Dock7    | Q8R1A4 | Dedicator of cytokinesis protein 7 OS=Mus musculus OX=10090 GN=Dock7 PE=1 SV=3               | 0.866666667 |
| Col1a2   | Q01149 | Collagen alpha-2(I) chain OS=Mus musculus OX=10090 GN=Col1a2 PE=1 SV=2                       | 0.76        |
| Sf3b1    | Q99NB9 | Splicing factor 3B subunit 1 OS=Mus musculus OX=10090 GN=Sf3b1 PE=1 SV=1                     | 0.853333333 |
| Iars     | Q8BU30 | Isoleucine--tRNA ligase cytoplasmic OS=Mus musculus OX=10090 GN=Iars1 PE=1 SV=2              | 0.893333333 |
| Tubb4a   | Q9D6F9 | Tubulin beta-4A chain OS=Mus musculus OX=10090 GN=Tubb4a PE=1 SV=3                           | 0.98        |
| Uba1     | Q02053 | Ubiquitin-like modifier-activating enzyme 1 OS=Mus musculus OX=10090 GN=Uba1 PE=1 SV=1       | 0.873333333 |

|         |        |                                                                                                 |              |
|---------|--------|-------------------------------------------------------------------------------------------------|--------------|
| Fbln2   | P37889 | Fibulin-2 OS=Mus musculus OX=10090 GN=Fbln2 PE=1 SV=2                                           | 0.853333333  |
| Tuba4a  | P68368 | Tubulin alpha-4A chain OS=Mus musculus OX=10090 GN=Tuba4a PE=1 SV=1                             | 0.91         |
| Ddx21   | Q9JIK5 | Nucleolar RNA helicase 2 OS=Mus musculus OX=10090 GN=Ddx21 PE=1 SV=3                            | 0.923333333  |
| Cnot1   | Q6ZQ08 | CCR4-NOT transcription complex subunit 1 OS=Mus musculus OX=10090 GN=Cnot1 PE=1 SV=2            | 0.893333333  |
| Tubb2b  | Q9CWF2 | Tubulin beta-2B chain OS=Mus musculus OX=10090 GN=Tubb2b PE=1 SV=1                              | 0.933333333  |
| Tubb2a  | Q7TMM9 | Tubulin beta-2A chain OS=Mus musculus OX=10090 GN=Tubb2a PE=1 SV=1                              | 1.953333333  |
| Uggt1   | Q6P5E4 | UDP-glucose:glycoprotein glucosyltransferase 1 OS=Mus musculus OX=10090 GN=Uggt1 PE=1 SV=4      | 0.893333333  |
| Acly    | Q91V92 | ATP-citrate synthase OS=Mus musculus OX=10090 GN=Acly PE=1 SV=1                                 | 0.87         |
| Tpp2    | Q64514 | Tripeptidyl-peptidase 2 OS=Mus musculus OX=10090 GN=Tpp2 PE=1 SV=3                              | 0.866666667  |
| Nes     | Q6P5H2 | Nestin OS=Mus musculus OX=10090 GN=Nes PE=1 SV=1                                                | 0.873333333  |
| Cand1   | Q6ZQ38 | Cullin-associated NEDD8-dissociated protein 1 OS=Mus musculus OX=10090 GN=Cand1 PE=1 SV=2       | 0.896666667  |
| Snd1    | Q78PY7 | Staphylococcal nuclease domain-containing protein 1 OS=Mus musculus OX=10090 GN=Snd1 PE=1       | 0.886666667  |
| Tubb4b  | P68372 | Tubulin beta-4B chain OS=Mus musculus OX=10090 GN=Tubb4b PE=1 SV=1                              | 0.896666667  |
| Vcp     | Q01853 | Transitional endoplasmic reticulum ATPase OS=Mus musculus OX=10090 GN=Vcp PE=1 SV=4             | 0.893333333  |
| Dnmt1   | P13864 | DNA (cytosine-5)-methyltransferase 1 OS=Mus musculus OX=10090 GN=Dnmt1 PE=1 SV=5                | 0.89         |
| Akap12  | Q9WTQ5 | A-kinase anchor protein 12 OS=Mus musculus OX=10090 GN=Akap12 PE=1 SV=1                         | 0.83         |
| Ddb1    | Q3U1J4 | DNA damage-binding protein 1 OS=Mus musculus OX=10090 GN=Ddb1 PE=1 SV=2                         | 0.91         |
| Utp20   | Q5XG71 | Small subunit processome component 20 homolog OS=Mus musculus OX=10090 GN=Utp20 PE=1 S          | 0.92         |
| Tuba1c  | P68373 | Tubulin alpha-1C chain OS=Mus musculus OX=10090 GN=Tuba1c PE=1 SV=1                             | 0.95         |
| Tuba1a  | P68369 | Tubulin alpha-1A chain OS=Mus musculus OX=10090 GN=Tuba1a PE=1 SV=1                             | 0.933333333  |
| Acta1   | P68134 | Actin alpha skeletal muscle OS=Mus musculus OX=10090 GN=Acta1 PE=1 SV=1                         | 23.796666667 |
| Tubb5   | P99024 | Tubulin beta-5 chain OS=Mus musculus OX=10090 GN=Tubb5 PE=1 SV=1                                | 0.9          |
| Chd4    | Q6PDQ2 | Chromodomain-helicase-DNA-binding protein 4 OS=Mus musculus OX=10090 GN=Chd4 PE=1 SV=1          | 0.876666667  |
| Ipo5    | Q8BKC5 | Importin-5 OS=Mus musculus OX=10090 GN=Ipo5 PE=1 SV=3                                           | 0.893333333  |
| Man2a1  | P27046 | Alpha-mannosidase 2 OS=Mus musculus OX=10090 GN=Man2a1 PE=1 SV=2                                | 0.886666667  |
| Copa    | Q8CIE6 | Coatomer subunit alpha OS=Mus musculus OX=10090 GN=Copa PE=1 SV=2                               | 0.876666667  |
| Pdcd11  | Q6NS46 | Protein RRP5 homolog OS=Mus musculus OX=10090 GN=Pdcd11 PE=1 SV=2                               | 0.9          |
| Hsp90b1 | P08113 | Endoplasmin OS=Mus musculus OX=10090 GN=Hsp90b1 PE=1 SV=2                                       | 0.906666667  |
| Lrpprc  | Q6PB66 | Leucine-rich PPR motif-containing protein mitochondrial OS=Mus musculus OX=10090 GN=Lrpprc      | 0.89         |
| Numa1   | E9Q7G0 | Nuclear mitotic apparatus protein 1 OS=Mus musculus OX=10090 GN=Numa1 PE=1 SV=1                 | 0.866666667  |
| Smchd1  | Q6P5D8 | Structural maintenance of chromosomes flexible hinge domain-containing protein 1 OS=Mus musculi | 0.873333333  |
| Eif4g1  | Q6NZJ6 | Eukaryotic translation initiation factor 4 gamma 1 OS=Mus musculus OX=10090 GN=Eif4g1 PE=1 SV   | 0.9          |
| Ckap5   | A2AGT5 | Cytoskeleton-associated protein 5 OS=Mus musculus OX=10090 GN=Ckap5 PE=1 SV=1                   | 0.896666667  |
| Col1a1  | P11087 | Collagen alpha-1(I) chain OS=Mus musculus OX=10090 GN=Col1a1 PE=1 SV=4                          | 0.683333333  |

|          |        |                                                                                                 |             |
|----------|--------|-------------------------------------------------------------------------------------------------|-------------|
| Acta2    | P62737 | Actin aortic smooth muscle OS=Mus musculus OX=10090 GN=Acta2 PE=1 SV=1                          | 0.953333333 |
| Vars     | Q9Z1Q9 | Valine--tRNA ligase OS=Mus musculus OX=10090 GN=Vars1 PE=1 SV=1                                 | 0.866666667 |
| Hspa8    | P63017 | Heat shock cognate 71 kDa protein OS=Mus musculus OX=10090 GN=Hspa8 PE=1 SV=1                   | 0.883333333 |
| Top2a    | Q01320 | DNA topoisomerase 2-alpha OS=Mus musculus OX=10090 GN=Top2a PE=1 SV=2                           | 0.873333333 |
| Vcl      | Q64727 | Vinculin OS=Mus musculus OX=10090 GN=Vcl PE=1 SV=4                                              | 0.89        |
| Actn4    | P57780 | Alpha-actinin-4 OS=Mus musculus OX=10090 GN=Actn4 PE=1 SV=1                                     | 0.883333333 |
| Actn1    | Q7TPR4 | Alpha-actinin-1 OS=Mus musculus OX=10090 GN=Actn1 PE=1 SV=1                                     | 0.883333333 |
| Tpr      | F6ZDS4 | Nucleoprotein TPR OS=Mus musculus OX=10090 GN=Tpr PE=1 SV=1                                     | 0.856666667 |
| Eif3a    | P23116 | Eukaryotic translation initiation factor 3 subunit A OS=Mus musculus OX=10090 GN=Eif3a PE=1 SV= | 0.87        |
| Hsp90aa1 | P07901 | Heat shock protein HSP 90-alpha OS=Mus musculus OX=10090 GN=Hsp90aa1 PE=1 SV=4                  | 0.873333333 |
| Eef1a1   | P10126 | Elongation factor 1-alpha 1 OS=Mus musculus OX=10090 GN=Eef1a1 PE=1 SV=3                        | 0.853333333 |
| Mybbp1a  | Q7TPV4 | Myb-binding protein 1A OS=Mus musculus OX=10090 GN=Mybbp1a PE=1 SV=2                            | 0.883333333 |
| Vim      | P20152 | Vimentin OS=Mus musculus OX=10090 GN=Vim PE=1 SV=3                                              | 0.883333333 |
| Eprs     | Q8CGC7 | Bifunctional glutamate/proline--tRNA ligase OS=Mus musculus OX=10090 GN=Eprs1 PE=1 SV=4         | 0.896666667 |
| Usp9x    | P70398 | Probable ubiquitin carboxyl-terminal hydrolase FAF-X OS=Mus musculus OX=10090 GN=Usp9x PE=      | 0.86        |
| Map1b    | P14873 | Microtubule-associated protein 1B OS=Mus musculus OX=10090 GN=Map1b PE=1 SV=2                   | 0.873333333 |
| Birc6    | O88738 | Baculoviral IAP repeat-containing protein 6 OS=Mus musculus OX=10090 GN=Birc6 PE=1 SV=2         | 0.906666667 |
| Dst      | Q91ZU6 | Dystonin OS=Mus musculus OX=10090 GN=Dst PE=1 SV=2                                              | 0.913333333 |
| Pkm      | P52480 | Pyruvate kinase PKM OS=Mus musculus OX=10090 GN=Pkm PE=1 SV=4                                   | 0.883333333 |
| Hspg2    | Q05793 | Basement membrane-specific heparan sulfate proteoglycan core protein OS=Mus musculus OX=100     | 0.78        |
| Mki67    | E9PVX6 | Proliferation marker protein Ki-67 OS=Mus musculus OX=10090 GN=Mki67 PE=1 SV=1                  | 0.856666667 |
| Iqgap1   | Q9JKF1 | Ras GTPase-activating-like protein IQGAP1 OS=Mus musculus OX=10090 GN=Iqgap1 PE=1 SV=2          | 0.883333333 |
| Ranbp2   | Q9ERU9 | E3 SUMO-protein ligase RanBP2 OS=Mus musculus OX=10090 GN=Ranbp2 PE=1 SV=2                      | 0.863333333 |
| Ubr4     | A2AN08 | E3 ubiquitin-protein ligase UBR4 OS=Mus musculus OX=10090 GN=Ubr4 PE=1 SV=1                     | 0.863333333 |
| Huwe1    | Q7TMY8 | E3 ubiquitin-protein ligase HUWE1 OS=Mus musculus OX=10090 GN=Huwe1 PE=1 SV=5                   | 0.893333333 |
| Gcn1     | E9PVA8 | eIF-2-alpha kinase activator GCN1 OS=Mus musculus OX=10090 GN=Gcn1 PE=1 SV=1                    | 0.89        |
| Acaca    | Q5SWU9 | Acetyl-CoA carboxylase 1 OS=Mus musculus OX=10090 GN=Acaca PE=1 SV=1                            | 0.86        |
| Eef2     | P58252 | Elongation factor 2 OS=Mus musculus OX=10090 GN=Eef2 PE=1 SV=2                                  | 0.896666667 |
| Snrnp200 | Q6P4T2 | U5 small nuclear ribonucleoprotein 200 kDa helicase OS=Mus musculus OX=10090 GN=Snrnp200 P      | 0.903333333 |
| Prpf8    | Q99PV0 | Pre-mRNA-processing-splicing factor 8 OS=Mus musculus OX=10090 GN=Prpf8 PE=1 SV=2               | 0.883333333 |
| Cad      | B2RQC6 | CAD protein OS=Mus musculus OX=10090 GN=Cad PE=1 SV=1                                           | 0.893333333 |
| Macf1    | Q9QXZ0 | Microtubule-actin cross-linking factor 1 OS=Mus musculus OX=10090 GN=Macf1 PE=1 SV=2            | 0.86        |
| Actb     | P60710 | Actin cytoplasmic 1 OS=Mus musculus OX=10090 GN=Actb PE=1 SV=1                                  | 0.9         |
| Actg1    | P63260 | Actin cytoplasmic 2 OS=Mus musculus OX=10090 GN=Actg1 PE=1 SV=1                                 | 0.903333333 |

|          |        |                                                                                             |             |
|----------|--------|---------------------------------------------------------------------------------------------|-------------|
| Hsp90ab1 | P11499 | Heat shock protein HSP 90-beta OS=Mus musculus OX=10090 GN=Hsp90ab1 PE=1 SV=3               | 0.883333333 |
| Myof     | Q69ZN7 | Myoferlin OS=Mus musculus OX=10090 GN=Myof PE=1 SV=2                                        | 0.873333333 |
| Tln1     | P26039 | Talin-1 OS=Mus musculus OX=10090 GN=Tln1 PE=1 SV=2                                          | 0.88        |
| Cltc     | Q68FD5 | Clathrin heavy chain 1 OS=Mus musculus OX=10090 GN=Cltc PE=1 SV=3                           | 0.896666667 |
| Sptbn1   | Q62261 | Spectrin beta chain non-erythrocytic 1 OS=Mus musculus OX=10090 GN=Sptbn1 PE=1 SV=2         | 0.88        |
| Fasn     | P19096 | Fatty acid synthase OS=Mus musculus OX=10090 GN=Fasn PE=1 SV=2                              | 0.883333333 |
| Sptan1   | P16546 | Spectrin alpha chain non-erythrocytic 1 OS=Mus musculus OX=10090 GN=Sptan1 PE=1 SV=4        | 0.87        |
| Myh10    | Q61879 | Myosin-10 OS=Mus musculus OX=10090 GN=Myh10 PE=1 SV=2                                       | 0.913333333 |
| Lrp1     | Q91ZX7 | Prolow-density lipoprotein receptor-related protein 1 OS=Mus musculus OX=10090 GN=Lrp1 PE=1 | 0.916666667 |
| Flnb     | Q80X90 | Filamin-B OS=Mus musculus OX=10090 GN=Flnb PE=1 SV=3                                        | 0.873333333 |
| Flnc     | Q8VHX6 | Filamin-C OS=Mus musculus OX=10090 GN=Flnc PE=1 SV=3                                        | 0.833333333 |
| Myh9     | Q8VDD5 | Myosin-9 OS=Mus musculus OX=10090 GN=Myh9 PE=1 SV=4                                         | 0.893333333 |
| Flna     | Q8BTM8 | Filamin-A OS=Mus musculus OX=10090 GN=Flna PE=1 SV=5                                        | 0.863333333 |
| Fn1      | P11276 | Fibronectin OS=Mus musculus OX=10090 GN=Fn1 PE=1 SV=4                                       | 0.833333333 |
| Dync1h1  | Q9JHU4 | Cytoplasmic dynein 1 heavy chain 1 OS=Mus musculus OX=10090 GN=Dync1h1 PE=1 SV=2            | 0.886666667 |
| Plec     | Q9QXS1 | Plectin OS=Mus musculus OX=10090 GN=Plec PE=1 SV=3                                          | 0.873333333 |
