# Supplementary material for: Quantitative Proteomics Analysis Expands the Roles of Lysine β-Hydroxybutyrylation Pathway in Response to Environmental β-Hydroxybutyrate
Source: Oxid Med Cell Longev. 2022 Feb 24;2022:4592170. doi: 10.1155/2022/4592170 (PMC8894020; doi:10.1155/2022/4592170)
Supplement: Supplementary Materials — Table S1/S2/S3 are the complete lists of identified proteins/Kac sites/Kbhb sites in MEF cells with or without BHB treated. [file 4592170.f1.zip]

Archive with 3 entries (3 files):
- Table S1. The identification of whole cell proteins in MEF.pdf
- Table S2. The identification of Kac sites and substrates.pdf
- Table S3. The identification of Kbhb sites and substrates.pdf
